# Supplementary material for: GATA6 mutations in hiPSCs inform mechanisms for maldevelopment of the heart, pancreas, and diaphragm
Source: eLife. 2020 Oct 15;9:e53278. doi: 10.7554/eLife.53278 (PMC7593088; doi:10.7554/eLife.53278)
Supplement: Supplementary file 1. [file elife-53278-supp1.xlsx]

## Sheet: GATA6.Variants & Phenotypes
Supplemental Table 1. Damaging Variants in GATA6 and Second Heart Field Genes Associated with CHD and Extra-Cardiac Phenotypes.
Table 1A: Distribution and clinical phenotypes of GATA6 variants in the PCGC dataset and published literature
Variant	LoF	Unique LoF	Missense	Unique Missense	Missense -containing Amino Acid	Exon 4	PCGC Variant	Cardiac Phenotype	Truncus Arteriosus	Outflow Tract	Pulmonary Valve	Aortic Valve	Ventricular Septum	Ventriculoarterial Junction	Atrial Septum	Pulmonary Arteries	Extracardiac Phenotype	Neurodevelopmental Delay	Pancreatic Agenesis	Extracardiac Phenotype Details	Reference
A29E			x	x	x			TGA						x							https://www.ncbi.nlm.nih.gov/pubmed/29101065
E51K			x	x	x			TOF		x	x		x								https://www.ncbi.nlm.nih.gov/pubmed/24841381
V99D			x	x	x			DORV						x							https://www.ncbi.nlm.nih.gov/pubmed/29101065
L112W			x	x	x		1-04687	coarctation		x								Yes			PCGC
E142K			x	x	x			PAVSD, MAPCA					x		x	x					https://www.jstage.jst.go.jp/article/circj/76/7/76_CJ-11-1389/_article
E142K			x					DORV, VSD, PS, dextrocardia		x	x		x	x							https://www.jstage.jst.go.jp/article/circj/76/7/76_CJ-11-1389/_article
A178V			x	x	x			AVSD/VSD/hypoplastic LV					x		x						https://www.ncbi.nlm.nih.gov/pubmed/20581743
S184N			x	x	x			DORV						x							https://www.ncbi.nlm.nih.gov/pubmed/29101065
S184N			x					DORV						x							https://www.ncbi.nlm.nih.gov/pubmed/29101065
S184N			x					DORV						x							https://www.ncbi.nlm.nih.gov/pubmed/29101065
S184N			x					PA/VSD		x	x		x								https://www.ncbi.nlm.nih.gov/pubmed/29101065
S184N			x					TOF		x	x		x								https://www.ncbi.nlm.nih.gov/pubmed/29101065
S184N			x					TOF		x	x		x								https://www.ncbi.nlm.nih.gov/pubmed/29101065
S184N			x					TGA						x							https://www.ncbi.nlm.nih.gov/pubmed/29101065
S184N			x					TGA						x							https://www.ncbi.nlm.nih.gov/pubmed/29101065
S184N			x					TOF		x	x		x								https://www.ncbi.nlm.nih.gov/pubmed/24841381
S184N			x					TOF		x	x		x								https://www.ncbi.nlm.nih.gov/pubmed/20631719
S184N			x					ASD							x						https://www.ncbi.nlm.nih.gov/pubmed/20631719
S184N			x					ASD							x						https://www.ncbi.nlm.nih.gov/pubmed/20631719
L198V			x	x	x			TOF													https://www.ncbi.nlm.nih.gov/pubmed/20581743
H204fs	x	x						PTA type III	x	x	x	x	x	x		x	x	Unknown (<1yo)	x	pancreatic and gallbladder agenesis, unilateral hydroureteronephrosis, IUGR/SGA	https://www.ncbi.nlm.nih.gov/pmc/articles/PMC4102676/
G220S			x	x	x			VSD					x								https://www.ncbi.nlm.nih.gov/pubmed/22407241
G220S			x					VSD/ASD					x		x						https://www.ncbi.nlm.nih.gov/pubmed/22407241
G220S			x					VSD					x								https://www.ncbi.nlm.nih.gov/pubmed/22407241
G220S			x					VSD					x								https://www.ncbi.nlm.nih.gov/pubmed/22407241
S232fs	x	x					1-09834	PTA Type I	x	x	x	x	x	x	x	x	x	Unknown (<1yo)		abnormal fingers	PCGC
P234fs	x	x						ASD/VSD					x		x		x	Not reported	x	pancreatic agenesis	https://www.ncbi.nlm.nih.gov/pubmed/24385578
G238*	x	x						PDA									x	No		malrotation, absence of the pericardium	https://www.ncbi.nlm.nih.gov/pmc/articles/PMC4062962/
G238*	x							VSD					x				x	Unknown (<1yo)		congenital diaphragmatic hernia, bilateral cervical ribs, absent R 12th rib, L ureteral duplicaton	https://www.ncbi.nlm.nih.gov/pubmed/24385578
G238*	x							VSD					x				x	Unknown (<1yo)		congenital diaphragmatic hernia	https://www.ncbi.nlm.nih.gov/pubmed/24385578
G245R			x	x	x			PTA	x	x	x	x	x	x		x					https://www.ncbi.nlm.nih.gov/pubmed/24841381
H258fs	x	x					S59X561F	PTA	x	x	x		x		x	x		No			PCGC
G280A			x	x	x		1-17395	Conotruncal		x							x	Yes		anophthalmia/microphthalmia and central incisor	PCGC
V293fs	x	x						TOF		x	x		x				x	Yes	x	pancreatic agenesis, biliary agenesis, microcephaly, NDD, inguinal hernia	https://www.ncbi.nlm.nih.gov/pubmed/22158542
Y323fs	x	x						ASD/VSD/supravalvarPS		x	x		x		x		x	No	x	pancreating hypoplasia, IUGR/SGA	https://www.ncbi.nlm.nih.gov/pmc/articles/PMC4184756/
W349S			x	x	x		1-04727	DOLV/TV stenosis		x	x	x	x	x				No			PCGC
V358fs	x	x						ASD							x		x	Not reported		congenital diaphragmatic hernia	https://www.ncbi.nlm.nih.gov/pubmed/24385578
G367*	x	x						TOF		x	x		x								https://www.ncbi.nlm.nih.gov/pubmed/23175051
G375fs	x	x						TOF		x	x		x				x	Not reported	x	pancreatic agenesis	https://www.ncbi.nlm.nih.gov/pmc/articles/PMC4062962/
Y377fs	x	x					1-02980	ASD/VSD/valvar and subvalvar PS/hypoplastic RV/hypoplastic LPA/hypoplastic TV/subaortic conus		x	x	x	x		x	x		No			PCGC
G394C			x	x	x			TOF		x	x		x								https://www.ncbi.nlm.nih.gov/pubmed/23175051
D404Y			x	x	x			VSD					x								https://www.ncbi.nlm.nih.gov/pubmed/23020118
D404Y			x					VSD/PDA					x					Not reported		Atral fibrillation	https://www.ncbi.nlm.nih.gov/pubmed/23020118
D404Y			x					VSD/PS		x	x		x								https://www.ncbi.nlm.nih.gov/pubmed/23020118
S418fs	x	x						PTA	x	x	x	x	x	x		x					https://www.ncbi.nlm.nih.gov/pubmed/29101065
G441*	x	x				x	1-02568	PTA type III	x	x	x	x	x	x		x	x	Yes		skeletal anomalies (pectus excavatum, kyphosis and thoracic scoliosis)	PCGC
T452A			x	x	x	x		ASD							x		x	Yes	x	pancreatic agenesis, colonic perforation, NDD	https://www.ncbi.nlm.nih.gov/pmc/articles/PMC4062962/
R456G			x	x	x	x	1-04280	PTA Type IIA/VSD	x	x	x	x	x	x		x	x	Yes		micropenis	PCGC
R456C			x	x		x		TOF		x	x		x				x	No		congenital diaphragmatic hernia, single umbilical artery	https://www.ncbi.nlm.nih.gov/pubmed/24385578
R456C			x			x		TOF		x	x		x				x	Yes	x	pancreatic agnesis, umbilical hernia, NDD	https://www.ncbi.nlm.nih.gov/pubmed/22158542
R456C			x			x		PTA/VSD	x	x	x	x	x	x		x	x	Yes	x	pancreatic agenesis, NDD, seizures	https://www.ncbi.nlm.nih.gov/pubmed/22158542
R456H			x	x		x		VSD/PDA/hypoplastic LPA									x	Yes	x	pancreatic agenesis, severe NDD	https://www.ncbi.nlm.nih.gov/pubmed/22158542
E460*	x	x				x		TOF		x	x		x								https://www.ncbi.nlm.nih.gov/pubmed/23020118
N466D			x	x	x	x		PDA									x	Yes	x	pancreatic and gallbladder agenesis, transient hypothyroidism, NDD, epilepsy, malrotation, microcolon	https://www.ncbi.nlm.nih.gov/pubmed/22158542
N466H			x	x		x		PTA	x	x	x	x	x	x		x					https://www.ncbi.nlm.nih.gov/pmc/articles/PMC2728998/; https://www.pnas.org/content/106/33/13933
N466S			x	x		x		ASD/PS/PDA		x	x				x		x	No	x	pancreatic hypoplasia, cholestasis, SGA/IUGR	https://www.ncbi.nlm.nih.gov/pubmed/23639568
A467T			x	x	x	x		ASD/PS		x	x				x		x	Yes	x	pancreatic agenesis, pituitary agenesis, NDD, seizures	https://www.ncbi.nlm.nih.gov/pmc/articles/PMC4062962/
K473Q			x	x	x	x		ASD							x		x	Not reported	x	pancreatic and gallbladder agenesis	https://www.ncbi.nlm.nih.gov/pubmed/22158542
M483V			x	x	x		1-00192	ASD/VSD/BAV/IAA TypeB/hypoplastic RV/hypoplastic TV/branch PA stenosis		x		x	x		x	x		Yes			PCGC
M483fs	x	x						VSD/ASD/PS, PDA		x	x		x	x	x		x	Not reported	x	pancreatic and gallbladder agenesis	https://www.ncbi.nlm.nih.gov/pmc/articles/PMC4062962/
E486fs	x	x						PTA/ASD	x	x	x	x	x	x		x					https://www.pnas.org/content/106/33/13933
E486fs	x							PS		x	x										https://www.pnas.org/content/106/33/13933
E486fs	x							PS/ASD/PDA		x	x				x						https://www.pnas.org/content/106/33/13933
R493*	x	x						VSD/PDA					x				x	Not reported	x	pancreatic agenesis, congenital diaphragmatic hernia, IUGR/SGA	https://www.ncbi.nlm.nih.gov/pubmed/24310933?dopt=Abstract
K500fs	x	x						DOLV/VSD/valvular PS/PFO/PDA/hypoplastic PA		x	x		x	x		x	x	Not reported	x	pancreatic agenesis	https://www.ncbi.nlm.nih.gov/pubmed/22158542
K502fs	x	x						PDA/ASD							x			No			https://www.ncbi.nlm.nih.gov/clinvar/variation/39844/; https://jmg-bmj-com.ezp-prod1.hul.harvard.edu/content/jmedgenet/49/10/642.full.pdf
K502fs	x							TGA/VSD/PS/ASD		x	x		x	x	x		x	Unknown (<1yo)	x	pancreatic hypoplasia, IUGR/SGA	https://www.ncbi.nlm.nih.gov/clinvar/variation/39844/; https://jmg-bmj-com.ezp-prod1.hul.harvard.edu/content/jmedgenet/49/10/642.full.pdf
K502fs	x							TOF		x	x		x				x	Yes	x	pancreatic hypoplasia, IUGR/SGA	https://www.ncbi.nlm.nih.gov/clinvar/variation/39844/; https://jmg-bmj-com.ezp-prod1.hul.harvard.edu/content/jmedgenet/49/10/642.full.pdf
c.1303-10C>G	x	x						IAA		x							x	Not reported	x	pancreatic and gallbladder agenesis	https://www.ncbi.nlm.nih.gov/pmc/articles/PMC4062962/
c.1516+1G>C	x	x						ASD/PFO							x		x	Not reported	x	pancreatic agenesis, transient hypothyroidism	https://www.ncbi.nlm.nih.gov/pubmed/22158542
TOTALS
70	27	21	43	24	20	13	9	70	10	40	36	12	45	21	21	14	29		20
TGA: Transposition of the Great Arteries
ToF: Tetrology of Fallot
DORV: Double Outlet Right Ventricle
DOLV: Double Outlet Left Ventricle
DX: Dextrocardia
VSD: Ventricular Septal Defect
HLV: Hypoplastic Left Ventricle
PA: Pulmonary Atresia
ASD: Atrial Septal Defect
PTA: Persistent Truncus Arteriosis
SPS: Supravalvular Pulmonary Stenosis
HLPA: Hypoplastic Left Pulmonary Artery
PS: Pulmonary Stenosis
HPA: Hypoplastic Pulmonary Artery

## Sheet: 1B. Unique & Recurrent Variants
Supplemental Table 1. Damaging Variants in GATA6 and Second Heart Field Genes Associated with CHD and Extra-Cardiac Phenotypes.
Table 1B. Unique and Recurrent Gata6 Variants
Residue	Variants	Recurrent
29	A29E
51	E51K
99	V99D
112	L112W
142	E142K	2
178	A178V
184	S184N	12
198	L198V
204	H204fs
220	G220S	4
232	S232fs
234	P234fs
238	G238*	3
245	G245R
258	H258fs
280	G280A
293	V293fs
323	Y323fs
349	W349S
358	V358fs
367	G367*
375	G375fs
377	Y377fs
394	G394C
404	D404Y	3
418	S418fs
441	G441*
452	T452A
456	R456C	3
456	R456G
456	R456H
460	E460*
466	N466H
466	N466D
466	N466S
467	A467T
473	K473Q
483	M483V
483	M483fs
486	E486fs	3
493	R493*
500	K500fs	4
c.1303-10C>G	c.1303-10C>G
c.1516+1G>C	c.1516+1G>C

## Sheet: 1C. 2nd Heart Field Gene Pheno 
Supplemental Table 1. Damaging Variants in GATA6 and Second Heart Field Genes Associated with CHD and Extra-Cardiac Phenotypes.
Table 1C: Clinical phenotypes associated with second heart field variants (exclusive of GATA6) in the PCGC dataset
Gene	Variant Type	ID	Sex	Phenotype	Truncus Arteriosus	Outflow Tract	Pulmonary Valve	Aortic Valve	Ventricular Septum	Ventriculoarterial Junction	Atrial Septum	Pulmonary Arteries	Extracardiac Abnormalities
EOMES	DMIS	1-03655	F	ASD							x
EOMES	DMIS	1-09757	M	ASD							x		Undescended testes, cerebral palsy
EOMES	DMIS	SAGW17NM	F	AVSD					x		x
EOMES	LOF	1-02082	M	HLHS/AA		x		x			x
EOMES	DMIS	1-04132	M	ToF		x	x		x	x		x
EOMES	LOF	M006-17	F	ToF									Heterotaxy
GATA4	DMIS	1-04852	F	ASD							x		Multiple liver hemangiomas, Gilbert syndrome
GATA4	DMIS	1-05149	F	ASD							x
GATA4	DMIS	1-06332	F	ASD			x				x		Diaphragmatic hernia
GATA4	LOF	1-06752	F	ASD			x				x
GATA4	LOF	1-00792	M	ASD/VSD		x	x		x		x
GATA4	DMIS	1-02637	M	CAVC					x		x	x
GATA4	DMIS	1-00483	M	Coarctation		x		x
GATA4	DMIS	1-01498	F	DORV/VSD		x	x		x	x	x		Strabismus, hearing loss
GATA4	DMIS	1-14603	F
GATA4	DMIS	1-15110	F										Hypospadias
GATA4	LOF	1-15812	F
HAND2	DMIS	1-04413	M	ASD/cleft MV							x		Seizures
HAND2	DMIS	1-05661	F	CAVC					x		x
HAND2	DMIS	1-13136	M	HLHS		x		x			x
HAND2	DMIS	1-06717	M	HLHS/AA		x		x				x
HAND2	DMIS	1-00442	F	VSD		x			x		x
ISL1	DMIS	1-05603	F	PA/IVS			x						Sacral dimple
ISL1	DMIS	1-02818	F	Shones		x			x		x
MEF2C	DMIS	1-10601	M	L-TGA/PA/VSD			x		x	x
MEF2C	DMIS	9504000084	M
MEIS1	DMIS	1-06927	F	HLHS		x		x			x
MEIS1	DMIS	1-07292	F	HLHS		x		x
MEIS1	DMIS	1-03325	F	MS/VSD		x			x
MEIS1	DMIS	SV225O8S	F	Single ventricle
MEIS2	DMIS	S13442K9	F	D-TGA						x
MEIS2	LOF	1-04135	F	Ebstein/ToF/VSD		x	x		x	x	x	x	Strabismus, congenital scoliosis
MEIS2	DMIS	1-03160	M	Scimitar/HLHS		x		x	x		x	x	Lung hypoplasia, R diaphragmatic eventration, undescended testes
MEIS2	DMIS	9504000194-0	F
NKX2-5	DMIS	1-05216	F	ASD							x
NKX2-5	LOF	1-05124	M	DORV/AVSD		x		x	x	x	x		Heterotaxy, asplenia, malrotation, umbilical hernia
NKX2-5	LOF	1-14814	M	HLHS/AS				x
NKX2-5	DMIS	BRZ-2011	F	ToF
NKX2-5	DMIS	1-01009	F	VSD		x			x
SMYD1	DMIS	S4D215R6	M	ASD							x
SMYD1	LOF	1-04192	M	Scimitar/ASD/VSD		x			x		x
TBX20	DMIS	1-02711	M	Ebstein/ToF/VSD		x	x	x
TBX20	DMIS	1-00075	M	PA/CAVC/TAPVR		x	x	x	x	x	x	x	Heterotaxy, low set ears, transverse liver, asplenia, malrotation, hydronephrosis, wide-spaced and overriding toes
TBX20	DMIS	1-03600	F	PA/IVS		x	x
TBX20	DMIS	1-02349	F	PTA	x	x	x	x	x		x	x
TBX20	DMIS	1-04162	M	ToF		x	x		x	x
TBX5	LOF	1-05525	M	ASD		x					x
TBX5	DMIS	1-07247	F	ASD							x
TBX5	DMIS	1-01337	M	ASD/VSD		x			x		x
TBX5	LOF	1-03626	F	ASD/VSD					x		x		Holt-Oram, triphalangeal thumb
TBX5	DMIS	1-10698	F	ASD/VSD					x		x		Holt-Oram, abnormal thumb
TBX5	DMIS	1-00976	F	PDA									Pyloric stenosis
TBX5	DMIS	92121078	M
TBX5	DMIS	GT04007023	M
TGA: Transposition of the Great Arteries
ToF: Tetrology of Fallot
DORV: Double Outlet Right Ventricle
DOLV: Double Outlet Left Ventricle
DX: Dextrocardia
VSD: Ventricular Septal Defect
HLV: Hypoplastic Left Ventricle
PA: Pulmonary Atresia
ASD: Atrial Septal Defect
PTA: Persistent Truncus Arteriosis
SPS: Supravalvular Pulmonary Stenosis
HLPA: Hypoplastic Left Pulmonary Artery
PS: Pulmonary Stenosis
HPA: Hypoplastic Pulmonary Artery
Cleft MV: Cleft Mitral Valve
CAVC: Complete Atrioventricular Canal
TAPVR: Total anomalous Pulmonary Artery Retur
Epstein Anomaly: Misplacement of Tricuspid Valve
Scimitar:Pulmonary Venobulbar syndrome
Shone: Syndrome with suprvalvular mitral or aortic membrane and parachute mitral valve
