# Supplementary material for: GATA6 mutations in hiPSCs inform mechanisms for maldevelopment of the heart, pancreas, and diaphragm
Source: eLife. 2020 Oct 15;9:e53278. doi: 10.7554/eLife.53278 (PMC7593088; doi:10.7554/eLife.53278)
Supplement: Supplementary file 2. [file elife-53278-supp2.xlsx]

## Sheet: GATA6_Het
Supplemental Table 2: Mean Differential Gene Expression in Heterozygous GATA6 Lines
Gene	GATA6 WT D0	GATA6 +/- D0	GATA6 WT D4	GATA6 +/- D4	GATA6 WT D8	GATA6 +/- D8	GATA6 WT D12	GATA6 +/- D12	GATA6 WT D30	GATA6 +/- D30
DDX11L1	0	0	0	0.366401	1.02089	0.542115	0.573148	0	0	0.466024
WASH7P	28.7323	43.4909	33.581	38.6351	36.5806	21.3101	19.6904	21.2337	45.1332	30.6644
MIR6859.1	5.38731	4.83232	8.95478	10.2547	3.01979	4.36485	2.92675	0	7.35516	6.41042
MIR1302.2HG	0	0	0	0	0	0.551424	0	0	0	0.437545
MIR1302.2	0	0	0	0	0	0	0	0	0	0
FAM138A	0	0	0	0	0	0	0	0	0.499638	0
OR4G4P	0	0	0	0	0	0	0	0	0	0
OR4G11P	0	0	0	0.366401	0	0	0	0	0.357303	0.437545
OR4F5	0	0	0	0	0	0	0	0	0	0
AL627309.1	0	0	0	0.348737	0	0.542115	0.593484	0	0.714605	2.2162
AL627309.3	0	0	0	0	0	0	0	0	0	0
CICP27	1.79577	1.93293	0.897307	3.61102	1.59567	1.64496	1.73978	1.29956	1.85622	5.94439
AL627309.7	14.3662	18.3628	32.0864	33.5232	17.9728	16.431	20.9384	17.0124	19.2129	22.1517
AL627309.8	44.8943	20.2958	57.0779	75.5488	27.4182	44.8351	25.6456	25.9048	29.4962	40.5078
AL627309.2	10.7746	0.966465	1.7346	0.348737	2.04178	0.542115	1.18697	1.94934	2.42849	7.2855
AL627309.5	10.7746	13.5305	16.1984	16.5718	10.6979	6.0005	7.02013	8.24265	13.284	18.5943
RNU6.1100P	0	0	0.34692	0	0	2.16846	0	0	0	0
AL627309.4	0	0	0	0	0	0	0	0	0	0
FO538757.2	0	0	0	0.715138	2.08467	0.542115	0	0	0	0
FO538757.1	82.6055	89.8812	79.946	95.4753	73.3928	57.9669	69.5671	64.8006	71.9162	61.5566
MIR6859.2	0	0	0	0	0	0	0	0	0	0
AP006222.1	8.08097	4.83232	10.4025	8.65231	9.18802	10.356	12.6906	14.536	25.1389	41.5641
RPL23AP24	0	0	0	0	0	0	0	0	0	0
AL732372.1	0	0	0	0	0	0	0	0	0	0
AL732372.2	38.6091	57.0214	54.7512	67.7484	34.2213	40.461	40.1166	43.1171	49.0635	60.9093
WBP1LP7	0	0	0	0	0	0	0	0	0	0
OR4F29	0	0	0	0	0	0	0	0	0	0
CICP7	0	0	0	0	0	0	0	0	0	0
AL732372.3	4.48943	4.83232	1.79461	7.7782	2.53079	2.18708	1.18697	1.25866	1.71388	1.83562
U6	0	0	0	0	0	0	0	0	0	0
AL669831.3	8.97886	4.83232	7.89573	6.10517	1.55278	4.37416	6.97945	4.34397	6.28325	7.31398
AC114498.1	0	0	0	0	0	0	0	0	0	0
MTND1P23	16.1619	17.3964	10.5876	11.2832	16.8233	16.9545	32.1129	23.4284	19.7852	31.1873
MTND2P28	2167.5	2152.32	2117.19	2001.48	2420.89	2112.48	3749.46	3241.14	3452.87	3393.57
MTCO1P12	394.172	524.79	354.208	348.255	509.846	486.448	640.521	735.272	1803.14	1544.13
MIR6723	0	0	0	0	0	0	0	0	0	0
MTCO2P12	24.2429	26.0945	10.3842	11.8086	15.4849	28.4227	18.5644	38.4096	23.9973	40.9842
MTATP8P1	1.79577	1.93293	0.34692	1.41261	3.06267	0	1.18697	0	1.21424	1.39807
MTATP6P1	14037.5	14049.5	11031.4	11131.9	11558.7	10124.5	15118.5	14706.9	16995.4	22616.9
MTCO3P12	103.257	65.7196	15.4628	20.302	25.9255	27.8713	36.1452	29.031	63.6983	115.551
WBP1LP6	0	0	0	0	0	0	0	0	0	0
OR4F16	0	0	0	0	0	0	0	0	0	0
CICP3	1.79577	0	0.897307	0.366401	1.59567	1.10285	0.573148	0.608882	0.357303	2.2162
AL669831.1	68.2393	76.3507	86.1906	118.819	90.2589	82.062	71.6767	56.7579	66.272	83.0429
RNU6.1199P	0	0	0	0	0	0	0	0	0.357303	0
AL669831.2	1.79577	0	0.897307	0.348737	0	0.542115	0	1.29956	0.357303	0
AL669831.5	43.9964	52.1891	40.2925	50.9161	51.6622	35.6005	40.4013	36.9874	101.842	86.5147
AL669831.4	0.897886	4.83232	3.87614	5.33704	5.50769	0.542115	1.78045	4.38487	4.85697	7.66609
FAM87B	6.2852	6.76525	3.1823	7.46479	3.10556	3.28993	6.36563	5.76622	14.353	10.8143
LINC01128	253.204	197.159	250.212	227.833	534.664	441.781	936.371	522.34	1328.17	1273.23
LINC00115	4.48943	8.69818	11.5867	13.2566	4.04068	4.40209	5.83316	5.72532	17.4961	20.7821
FAM41C	0.897886	0	0.448654	0	0	0	1.16663	0.649779	0	0.932047
TUBB8P11	3.59154	1.93293	1.24423	0.348737	0.531889	1.64496	1.18697	0	0	0
AL669831.6	0	0.966465	0	0	0	0.542115	0	0	0	1.31263
AL645608.7	2.69366	1.93293	19.1355	24.7871	21.9277	22.357	10.52	6.86129	9.49605	9.03568
AL645608.3	8.97886	16.4299	239.914	260.641	265.26	276.282	93.924	106.377	104.558	98.2042
AL645608.5	0	0	0	0.715138	0.489003	1.63565	0	0	0	0.466024
AL645608.1	23.345	32.8598	1063.78	1101.76	985.572	1128.84	467.945	587.99	416.348	1540.98
SAMD11	23.345	17.3964	1500.92	1397.93	1246.81	1274.41	384.131	680.041	155.972	616.627
NOC2L	2876.83	3012.47	1832.72	1875.53	1489.22	1550.48	1578.79	1308.51	1113.38	1006.9
KLHL17	542.323	602.108	690.942	874.888	446.567	453.277	371.643	364.812	183.249	174.075
PLEKHN1	68.2393	68.619	58.789	64.5613	64.8481	49.2744	53.8481	77.3463	30.8499	0.87509
PERM1	10.7746	5.79879	4.9169	14.3204	5.67923	5.47701	8.20709	13.1546	11.0705	3.11977
AL645608.8	0.897886	0	22.156	23.807	18.5649	26.815	19.3206	25.4186	3.9274	4.48936
HES4	6.2852	8.69818	158.048	164.376	251.971	283.732	282.861	434.684	93.9091	129.039
ISG15	135.581	109.211	137.741	118.21	144.855	181.649	244.297	235.288	75.1987	91.0895
AL645608.4	0	0	0.34692	0	0.489003	0.542115	0.573148	0	0.999275	1.86409
AL645608.2	0.897886	0	1.7346	1.08154	7.7639	9.86047	6.44698	5.68443	26.998	8.59814
AGRN	10501.7	9620.19	13823.1	20336.4	18672.4	26512.5	13732.7	17769.9	5812.43	10100.5
AL645608.6	0	0	0	0	0	0	0	0	0	0
AL390719.1	36.8133	34.7927	28.7841	48.8237	31.8364	30.6098	31.0479	63.6601	10.1409	11.7749
AL645608.9	1.79577	0.966465	0	1.41261	0.489003	0.551424	3.49989	0.608882	0	0
RNF223	0.897886	0	1.38768	0.732802	4.65834	6.04705	8.20709	22.3696	4.642	1.36959
C1orf159	206.514	200.058	282.984	350.63	316.339	348.839	314.441	261.602	143.69	153.236
LINC01342	2.69366	1.93293	0	0.732802	0	0	0	0	0	0
MIR200B	0	0	2.24327	3.19163	0.531889	0	0	0	0	0
MIR200A	0.897886	0	1.79461	2.49415	0	0	0	0	0	0
MIR429	0.897886	0.966465	6.7298	7.01007	0	0	0	0	0	0
AL390719.2	20.6514	20.2958	28.8573	55.9968	3.01979	2.19639	4.03237	0	0	0
TTLL10.AS1	3.59154	4.83232	4.42652	14.8589	1.46701	0.551424	0	0	0	0
TTLL10	5.38731	1.93293	4.87518	21.922	1.46701	0.551424	0	0.649779	0	0
TNFRSF18	2.69366	6.76525	23.1734	23.3346	2.12755	1.63565	1.71944	4.34397	0.357303	1.31263
TNFRSF4	4.48943	0	0.34692	0.697475	0.531889	1.63565	0.573148	0	0.714605	0.466024
SDF4	885.315	935.538	1415.99	1371.94	905.754	1140.17	1425.44	1272.83	1133.01	1374.53
B3GALT6	91.5843	115.009	452.055	256.377	375.877	384.598	463.197	330.26	372.374	480.823
C1QTNF12	12.5704	26.0945	86.1672	94.4644	41.9596	45.4517	15.7597	25.2141	22.9951	19.384
AL162741.1	0.897886	3.86586	5.26382	4.72789	5.10446	5.43977	4.64619	3.1671	0.714605	2.71071
UBE2J2	576.443	651.397	682.216	638.658	608.049	621.196	638.989	622.551	425.06	419.401
LINC01786	3.59154	0	4.67171	7.90185	3.46591	3.28062	5.81282	5.68443	6.64056	5.802
SCNN1D	32.3239	34.7927	109.609	161.445	109.407	98.3348	140.772	127.002	173.32	157.317
ACAP3	582.728	560.55	690.143	991.217	881.45	885.627	1398.18	944.673	752.923	1252.78
MIR6726	0	0	0	0	0	0	0	0	0	0
PUSL1	333.116	309.269	265.223	267.81	215.76	287.508	233.818	198.014	149.389	146.073
INTS11	1862.21	1762.83	1684.78	1971.85	1329.26	1254.51	1168.15	1067.47	1036.66	920.49
MIR6727	0	0	0	0	0	0	0	0	0	0
AL139287.1	17.0598	24.1616	19.5241	26.288	20.0575	15.2816	19.8327	13.9271	25.9987	21.1342
CPTP	270.264	318.933	296.598	298.861	256.132	267.449	498.03	401.304	312.725	405.731
TAS1R3	10.7746	11.5976	17.3592	23.1448	12.7826	9.33698	7.59327	5.60263	15.0735	19.2986
DVL1	1018.2	949.068	1423.64	1358.02	959.973	1002.53	810.728	719.296	626.247	518.972
MIR6808	0	0	0	0	0	0	0	0	0	0
MXRA8	221.778	198.125	2061.64	2241.65	1467.46	1702.22	1171.67	1534	499.98	450.909
AURKAIP1	520.774	579.879	553.824	466.959	399.203	364.486	675.093	531.678	320.441	379.662
NDUFB4P8	0	0	0	0.366401	0	0	0	0	0	0
CCNL2	2182.76	2133.95	2977.59	3938.03	2699.72	2503.8	2838.72	2727.29	2395.26	2194.13
AL391244.1	281.936	303.47	262.91	235.903	180.261	185.985	190.202	193.834	164.323	215.117
MRPL20	148.151	135.305	229.016	223.472	200.309	184.715	284.516	255.136	180.117	216.401
RN7SL657P	0	0	0	0	0	0	0	0	0	0
AL391244.3	87.0949	92.7806	94.4698	112.661	37.9016	46.4708	16.9263	25.4958	77.6331	73.4272
ANKRD65	28.7323	19.3293	45.9581	58.2351	22.1594	27.3199	13.4061	34.311	6.28325	1.77866
AL391244.2	2.69366	0.966465	3.87614	3.90677	1.9989	4.36485	0.593484	0.608882	1.35658	0.466024
TMEM88B	1.79577	5.79879	7.54881	8.21526	3.14845	6.57055	0	0.608882	0.499638	0.437545
LINC01770	3.59154	8.69818	16.1149	18.2095	11.1869	15.833	13.4264	19.975	39.2072	17.5769
VWA1	486.654	540.254	817.229	839.258	480.257	595.418	634.407	701.034	288.806	171.44
ATAD3C	8.97886	5.79879	8.26094	10.6564	22.3738	8.72039	17.4791	13.4	17.6414	4.43241
ATAD3B	624.031	646.565	490.217	590.134	395.746	362.69	390.74	327.938	287.659	293.204
AL645728.2	0	0.966465	0.795574	1.08154	0.531889	1.08423	4.07304	0.649779	5.56865	1.75018
ATAD3A	797.322	772.205	518.67	620.762	457.548	498.047	630.819	503.787	349.777	386.279
TMEM240	39.507	28.0275	68.748	60.544	57.9591	60.0888	51.8236	57.5713	67.6315	53.1112
SSU72	1178.92	1159.76	1272.99	1180.31	1053.67	990.363	1210.72	1116.53	960.933	1019.22
AL645728.1	7.18308	4.83232	9.09823	9.92362	5.14734	3.83204	8.16642	7.67466	11.5702	11.2804
AL691432.3	0	0	0	0	0	0	0	0	0.357303	0
FNDC10	275.651	248.381	226.204	223.494	185.416	205.276	252.545	188.958	468.746	523.464
AL691432.2	78.116	79.2501	81.8841	79.9057	48.814	73.2578	74.5017	80.6316	194.328	272.003
MIB2	1000.24	972.263	1809.06	3200.66	1341.99	1329.03	1217.17	1085.85	1856.92	1519.93
MMP23B	5.38731	6.76525	41.7168	54.8759	34.8819	30.5912	10.459	13.7226	10.5709	13.0875
CDK11B	674.312	696.821	559.189	657.967	528.513	530.059	536.549	549.908	378.855	364.337
FO704657.1	0	0	0	0	0	1.08423	0	0	0	0.932047
SLC35E2B	1647.62	1665.22	1587.16	1674.7	1609.11	1714	1273.39	1360.28	1185.66	1428.45
AL691432.1	18.8556	24.1616	34.4366	49.6226	44.8335	51.8733	36.6981	34.5927	46.4142	49.1163
MMP23A	1.79577	2.89939	4.18134	2.45882	1.02089	2.72919	1.18697	0	0.357303	0
CDK11A	35.9154	39.6251	31.9247	53.2336	40.8785	44.293	42.5109	32.0754	36.7817	22.0377
AL031282.2	17.9577	20.2958	48.1648	57.9969	38.751	52.3875	25.7066	30.2079	42.9894	58.4368
AL031282.1	79.0139	78.2836	141.748	164.76	119.565	149.74	90.2207	99.9205	149.18	212.843
SLC35E2	74.5245	82.1495	121.099	134.406	80.1185	120.392	72.9043	84.612	124.84	167.644
NADK	1301.04	1298.93	1092.62	1060.26	947.156	1034.52	920.761	872.975	550.769	615.902
GNB1	8060.32	6994.3	5896.64	5573.09	6647.77	6914.22	7508.94	6910.03	3603.27	3852.51
AL109917.1	0.897886	0	2.63191	1.06388	1.02089	1.09354	5.28035	3.77598	4.42704	7.55218
CALML6	0.897886	0.966465	6.50805	3.94209	0.489003	1.64496	3.49989	5.68443	3.21279	4.51784
TMEM52	192.148	201.991	133.578	119.843	62.5061	64.0326	27.4057	68.0495	35.9974	15.8552
CFAP74	3.59154	4.83232	6.91498	41.8752	2.53079	1.64496	1.78045	7.95637	41.9901	3.52884
AL391845.2	6.2852	3.86586	0.693841	0	0	0	0	0	0	0
GABRD	30.5281	21.2622	1.38768	5.4077	2.12755	1.64496	0	0	0.999275	0
AL391845.1	0	0	0.34692	0.366401	0.489003	0	1.16663	1.25866	0.499638	0.437545
PRKCZ	736.266	707.452	455.102	455.172	316.468	376.205	390.004	455.222	502.269	365.966
AL590822.2	2.69366	13.5305	5.91594	8.9304	5.19023	3.82273	2.86574	2.43553	6.35589	4.98387
PRKCZ.AS1	36.8133	43.4909	62.0965	68.6886	78.4371	72.6319	50.6773	57.8166	81.052	46.4237
FAAP20	597.094	676.525	914.38	849.897	680.051	772.685	625.851	570.824	450.583	521.939
AL590822.1	0	0	1.04076	0	0.978006	0	2.37394	1.25866	0	0.87509
SKI	2386.58	2298.25	2219.67	2234.54	2339.39	2392.88	1452.73	1525.64	1108.75	1056.84
MORN1	140.07	100.512	268.502	313.972	205.242	212.493	176.531	166.957	199.958	174.332
AL589739.1	0	2.89939	7.44707	6.01685	3.01979	1.64496	4.05271	1.21776	2.28615	0.437545
AL513477.1	35.0175	30.9269	83.1466	103.876	50.6241	45.3121	60.6242	56.1945	32.067	38.1311
AL513477.2	0	0	4.97691	7.88419	3.10556	7.63616	6.38597	2.51732	14.9253	9.47323
RER1	822.463	758.675	899.126	872.808	788.823	798.761	1076.64	896.485	792.159	852.637
PEX10	547.71	539.287	472.305	444.723	392.289	384.917	374.041	306.086	279.807	356.635
PLCH2	0	0.966465	1.38768	1.0992	0.978006	1.10285	0.593484	1.94934	2.71316	2.27316
AL139246.1	0	0	0	0	0	0	0	0	0	0
AL139246.4	0	0	0	0	0	0.551424	0.593484	0	0	0.932047
PANK4	223.574	267.711	297.889	287.172	270.854	274.357	350.054	305.646	531.208	523.453
HES5	0.897886	0	1.04076	0.348737	0	1.08423	0.573148	0	0	0
AL139246.5	0	0	0	0	0	0	0	0	0	0
TNFRSF14.AS1	0	0	0	0	0	0	0	0	0	0
TNFRSF14	0	0	7.40535	3.87144	1.50989	0	1.16663	1.86754	2.35585	0
AL139246.2	0	0	0	0	0	0	0	0	0	0
AL139246.3	0	0	0	0	0	0	0	0	0	0
FAM213B	353.767	329.564	166.137	192.522	87.3678	110.485	90.9159	101.138	103.481	81.9115
MMEL1	6.2852	13.5305	2.53018	2.45882	0.489003	1.08423	0	2.47643	1.49891	0
AL831784.1	0.897886	0	0	0	0	0	0	0	0	0
TTC34	4.48943	0	0.448654	2.11009	0	0.542115	1.18697	0.608882	1.49891	3.64275
AC242022.1	0	0	0	1.43028	0.489003	0	0	0	0	0
AL592464.2	0	0	0	0	0	0	0	0	0	0
AL592464.1	0	0	0	0	0	0	0	0	0	0
AL589702.1	0	0	0	0	0	0	0	0	0	0
ACTRT2	0	0	2.14153	0.348737	3.63745	1.62634	0.593484	0.608882	1.71388	0
LINC00982	0	0.966465	1.59115	1.41261	1.55278	1.63565	6.95912	0	2217.73	575.252
PRDM16	15.2641	18.3628	31.1708	11.3716	27.8815	25.1142	96.9524	20.2204	1164.74	419.38
MIR4251	0	0	0	0	0	0	0	0	0	0.437545
AL008733.1	0	0	2.24327	0.697475	0	0	1.16663	0.649779	3.21279	0.437545
AL512383.1	0	0	0.448654	0	0.978006	0	0	0.649779	10.5709	2.71071
AL590438.1	0	0	1.04076	0	0	0	0.573148	0.649779	20.1425	8.48422
ARHGEF16	490.246	465.836	671.045	942.397	397.41	500.131	490.867	481.531	191.888	79.848
AL512413.1	0.897886	0	3.87614	10.7271	7.01758	6.01912	7.02013	1.90844	4.49967	1.36959
MEGF6	1007.43	1075.68	2012.34	2912.93	1871.54	2783.25	1418.24	1719.15	880.034	1068.84
MIR551A	0	0	0	0	0	1.08423	0	0	0	0
AL513320.1	4.48943	1.93293	4.9169	5.02363	0	2.71057	0.573148	1.90844	2.71316	4.92691
TPRG1L	276.549	307.336	449.619	504.419	402.858	462.763	585.303	466.795	478.144	574.68
WRAP73	360.052	400.116	441.762	479.156	327.337	347.269	309.385	348.477	241.03	215.753
TP73	120.317	140.137	136.872	131.051	71.3337	94.5865	63.9817	213.445	45.781	17.9005
AL136528.1	0	0	0	0.348737	0	0	0	1.21776	0.714605	0
AL136528.2	2.69366	0	0	0.697475	0	0	0.573148	0.649779	0.357303	0
TP73.AS1	928.414	1035.08	944.896	987.536	915.02	957.491	751.351	734.731	888.778	917.578
TP73.AS1.1	0	0	0	0	0	0	0	0	0	0
CCDC27	18.8556	16.4299	11.9753	9.33213	6.70012	8.15965	20.3855	14.4542	68.195	42.3538
SMIM1	6.2852	8.69818	19.399	12.5591	10.655	14.2346	21.04	23.4284	41.781	60.8627
LRRC47	1901.72	1780.23	978.25	934.707	942.386	881.514	972.442	869.562	1194.98	1205.64
RN7SL574P	6.2852	3.86586	3.22402	1.79668	1.02089	1.63565	0.593484	0.608882	4.2847	5.85896
AL365330.1	6.2852	15.4634	10.5042	12.069	5.14734	8.15965	6.40631	3.12621	9.99861	17.929
CEP104	593.502	542.187	648.911	543.082	736.809	775.573	683.378	713.248	618.348	497.517
DFFB	209.207	173.964	116.362	106.432	116.167	126.776	93.1438	95.781	119.553	91.118
C1orf174	232.552	236.784	288.545	284.294	255.06	271.777	254.265	250.674	204.26	174.236
LINC01134	4.48943	2.89939	7.05843	11.6673	2.53079	1.65427	1.73978	1.86754	7.9245	6.70557
LINC01346	0	0	0	0	0	0	0.593484	0	0.357303	0
LINC01345	0	0	0	0	0	0	0	0	0	0
AL805961.1	0	0	0	0	0	0	0	0	0	0
AL805961.2	0	0	0	0	0.489003	0	0	0	0.85694	0
EEF1DP6	0	0	0.448654	0	0	0	0	0	0	0
LINC01777	0	0	0	0	0	0	0	0	1.07191	0
AL355602.1	0	0	0	0	0	0	0	0	0	0
Z98747.1	0	0	0	0	0	0	0	0	0	0
LINC01646	0	0.966465	0	0	0.531889	0	0	0	1.42921	0
AJAP1	62.852	66.6861	22.9048	49.6226	8.9736	10.4119	18.0726	18.3119	4.3544	1.36959
BX005132.2	0	0	0	0	0	0	0	0	0	0
BX005132.1	0	0	0	0	0	0	0	0.608882	0	0
AL691497.1	0.897886	0.966465	0	0.348737	0	0	0	0	0	0
AL139823.1	0	0	0	0.366401	0	0	0	0	0.499638	0
Z98259.3	0	0	0.34692	0	0	0	0	0	0.714605	0
Z98259.2	0	0	0	0	0	0	0	0	0	0
Z98259.1	0	0	0	0	0	0	0	0	0	0
Z97988.1	0	0	0	0	0	0	0	0	0	0
AL365255.1	0	0	0.448654	0	1.06378	0	0	0	0	0
MIR4417	2.69366	0	0	0	0	0	0	0	0	0
MIR4689	0	0	0.795574	1.77901	0	0	0	0	0	0
NPHP4	376.214	302.503	909.589	1004.84	495.922	540.199	371.298	361.318	209.033	201.107
KCNAB2	178.679	224.22	329.37	349.835	192.691	250.925	141.695	201.013	172.184	134.831
CHD5	91.5843	110.177	31.4943	38.5867	50.7444	42.0966	21.6539	70.3215	5.71391	10.7574
RPL22	1262.43	1472.89	2207.32	1834.9	1588.58	1316.5	1286.28	1340.33	1918.74	1700.58
AL031847.1	0	3.86586	0	0.732802	0.531889	1.10285	4.66653	0.608882	7.92743	11.7749
RNF207	79.9118	110.177	89.086	133.095	345.765	258.038	633.895	450.315	2798.04	4265.53
ICMT	2776.26	2515.71	1738.53	1850.79	1514.1	1568.73	1902.08	1608.61	1263.97	1699.73
LINC00337	94.278	123.707	37.8875	34.7637	27.2639	28.4506	9.35339	15.5901	6.71319	2.73918
HES3	129.296	115.976	4.77344	11.4245	4.52968	1.65427	0	1.86754	0	0
GPR153	323.239	434.909	365.288	362.372	128.735	92.774	156.268	178.248	523.992	734.992
ACOT7	2840.91	2652.95	775.622	810.557	657.832	721.943	1117.55	924.348	145.979	169.11
AL031848.2	0	0	0	0	0	0	0	0	0	0
HES2	17.9577	18.3628	3.08056	3.19163	5.14734	5.51424	16.3328	28.5039	39.274	0.437545
ESPN	201.126	225.186	52.4845	47.0094	60.5501	65.51	38.007	96.4717	15.9246	8.10364
MIR4252	0	0	0.34692	0	0	0	0	0	0	0
AL031848.1	1.79577	0.966465	0	0	0	0.551424	0	0	0	0
TNFRSF25	197.535	209.723	271.046	248.347	245.692	181.051	223.359	172.478	167.318	170.319
PLEKHG5	1192.39	1444.86	1189.35	1165.14	1027.75	828.659	824.951	668.549	687.586	733.224
NOL9	630.316	692.955	590.462	671.32	650.84	629.965	567.881	478.001	444.657	412.198
RNU6.731P	0.897886	0	1.69288	1.43028	0	1.08423	0.573148	0	3.21279	1.83562
AL591866.1	3.59154	9.66465	8.11749	7.48246	3.14845	11.4496	7.51193	4.34397	5.14164	5.50685
TAS1R1	3.59154	0.966465	3.52922	4.29083	6.21112	6.02843	4.68686	2.55822	4.92667	2.24468
ZBTB48	369.031	346.961	321.756	360.739	314.066	308.229	284.825	250.76	241.527	244.763
KLHL21	900.579	1029.28	802.283	902.155	1125.42	927.377	1212.03	923.326	2027.55	2688.74
PHF13	699.453	693.922	1019.75	939.127	1027.94	1016.86	725.258	744.587	484.564	683.357
THAP3	102.359	103.412	165.873	125.008	150.157	146.46	142.797	144.378	138.827	134.148
DNAJC11	1532.69	1430.37	818.163	878.233	698.479	666.863	893.973	703.824	814.637	847.899
LINC01672	0	0	0	0	0.531889	0	0	0	0.357303	0.466024
AL591163.1	0	0	0.34692	0	1.50989	0	0.593484	0	0	0.437545
CAMTA1.DT	5.38731	0	4.22306	2.16308	2.08467	0	0.573148	2.43553	2.14382	5.39293
CAMTA1	355.563	414.613	643.225	665.154	580.871	581.958	626.733	562.172	615.333	595.682
AL590128.1	0	0	1.14249	0.348737	0.978006	0.551424	0	0.608882	2.71316	0.437545
AL512330.1	0	0	0	0	0	0	0.593484	0	0	0.437545
RNU1.8P	0	0	0	0	0	0	0.573148	0	0.357303	0.466024
CAMTA1.IT1	0	1.93293	0.34692	0	0	0.542115	0.593484	0	0.85694	0.903568
Z97987.1	0	0	0.693841	1.44794	0	0.542115	0	0	0.714605	0.437545
AL365194.1	0	0	1.34596	0.697475	0.531889	0	0.593484	0	0	0.437545
AL359881.3	0.897886	3.86586	11.078	6.85564	1.9989	6.57985	7.63395	7.63376	3.28543	2.68223
AL359881.2	4.48943	0	2.28499	3.55803	0.489003	4.38347	2.90641	1.25866	1.07191	0
AL359881.1	0	0	10.2825	4.60424	9.54837	3.28062	1.73978	3.81688	4.35733	0.87509
VAMP3	492.939	592.443	567.08	550.361	828.776	900.039	1156.46	1319.38	1416.3	1614.27
Z98884.2	5.38731	6.76525	7.60882	10.4313	6.65724	4.91627	8.71923	7.51107	20.9239	18.918
PER3	430.087	363.391	251.464	292.982	282.118	324.725	112.407	294.568	933.162	687.551
Z98884.1	4.48943	1.93293	3.32575	5.4077	4.21222	6.01912	0	5.07554	17.3567	11.7179
UTS2	0	3.86586	1.48941	0.715138	2.4879	3.82273	3.47956	2.47643	0	0.466024
TNFRSF9	0	0	0	0.366401	4.12645	3.85066	18.1133	6.25241	7.21283	4.02334
AL009183.1	0	0	0	0	0	0	0	0	0	0.466024
PARK7	625.826	673.626	1285.83	953.315	840.7	829.696	1377.93	1201.1	707.964	824.285
Y_RNA	2.69366	0	2.97883	1.43028	2.53079	3.28062	2.3536	1.21776	1.57155	0
AL034417.4	2.69366	0.966465	9.64862	10.0296	12.3365	10.8982	12.1988	4.38487	5.35661	2.71071
AL034417.3	0	0	0.34692	0.348737	1.46701	0.542115	1.16663	1.94934	0.85694	0.466024
ERRFI1	802.71	712.284	1176.64	814.957	3416.09	3467.78	2643.41	1901.9	826.417	273.525
AL034417.2	2.69366	1.93293	5.2221	6.80265	7.7639	6.00981	5.28035	4.99375	6.64056	3.52884
AL034417.1	0	0	0.448654	0	0	0	0	0	0.357303	0.466024
AL358876.1	0	6.76525	0	0	0	0	0	0	0	0.466024
LINC01714	0	0	0	0	0	0	0	0	0.499638	0
RNU1.7P	0	0	0	0	0	0	0	0	0	0
AL358876.2	0	0	0	0	0	0	0	0	0.999275	0
RNU6.991P	0	0	0	0	0	0	0	0	0	0
SLC45A1	59.2605	47.3568	8.20093	12.2103	20.9068	9.33698	5.21934	12.5048	12.5694	12.1555
Y_RNA.1	0	0	0	0	0	0	0.593484	0	0	0
RERE	2713.41	2396.83	2427.17	2752.67	4168.22	4003.21	3449.76	3516.52	1973.03	2589.27
AL096855.1	2.69366	1.93293	3.38576	2.84289	3.55168	2.2057	5.30068	5.11644	2.71316	5.802
SNORA77	0.897886	0.966465	0.795574	0.715138	0	0.542115	0	1.21776	0.85694	0.466024
AL096855.2	2.69366	0	0	0.348737	1.02089	2.18708	0.593484	0.608882	1.71388	0.903568
RPL7P11	0.897886	2.89939	3.4692	5.66812	5.19023	2.74781	2.86574	3.08531	10.9979	5.83048
RPL7P7	0.897886	0	4.36651	5.02363	6.65724	2.72919	8.16642	5.76622	12.4968	8.95025
Y_RNA.2	0	0	0.34692	2.82523	0.489003	2.7385	3.49989	1.86754	1.57155	1.77866
AL357552.1	1.79577	1.93293	2.48846	4.95298	2.57367	2.72919	1.76012	0.608882	4.2847	1.86409
AL357552.2	0	0	3.97787	6.43624	5.59346	2.2057	5.89417	6.29331	10.4983	5.01234
RPL23AP19	0	0	0	0	0	0	0	0	0.357303	0
ENO1	28855.4	34540.5	20370.9	17985.7	17888.4	16548.7	36029.7	20320.9	31359.3	26047.8
MIR6728	0	0	0	0	1.06378	1.09354	0.573148	0.649779	1.21424	0.87509
ENO1.IT1	2.69366	9.66465	3.97787	5.35471	6.35704	9.28112	8.14608	1.90844	22.998	18.0714
ENO1.AS1	0	0	1.24423	0.715138	0.489003	1.09354	1.16663	1.25866	1.07191	3.96638
RNU6.304P	0	0.966465	0	0	0	0	0	0	0	0
HMGN2P17	0	3.86586	4.12132	4.30849	2.44501	4.92558	4.66653	1.86754	0.85694	4.95539
AL139415.1	0	0	0	0	0.531889	0	0	0	0	0
AL139415.2	0	0	0	0	0	0	0	0	0	0
CA6	0	0	0	0	0	0	0	0	0.999275	0
RN7SL451P	0	0	0	0	0	0	0	0	0	0
SLC2A7	0.897886	0.966465	0	0	0.531889	1.10285	0	0.649779	0.714605	0
SLC2A5	0.897886	1.93293	0.34692	0	0	0	1.76012	0.608882	3.9274	8.59814
SCARNA16	0	0	0	0	0	0	0	0	0	0
GPR157	42.2006	50.2562	90.2519	57.3877	248.463	229.466	532.171	653.327	313.942	334.349
MIR34AHG	281.936	365.324	173.584	201.157	178.416	253.738	146.727	239.341	248.891	183.406
MIR34A	0	0	0	0	0	0	0	0	0	0
LINC01759	11.6725	9.66465	12.5674	7.22204	12.9112	15.8703	16.3939	36.8238	32.2123	17.1393
Z98044.1	5.38731	0.966465	1.7346	3.26228	5.99669	11.4682	3.45922	6.86129	11.6399	11.1949
H6PD	361.848	316.034	1173.37	577.921	1117.04	1171.36	1313.39	1296.57	1367.55	1884.5
SPSB1	84.4012	106.311	417.035	438.825	313.036	466.418	333.266	570.942	154.621	233.082
BX323043.1	0	0	0	0.348737	0.489003	2.7385	0.593484	1.86754	0.714605	2.30164
AL928921.2	0	0	0.693841	1.76135	1.95601	3.27131	2.3536	1.25866	6.99786	5.42141
RNA5SP40	0	0	0	0	0	0	0	0	0	0
AL928921.1	0	0	0	0	0	0	0	0	0.357303	0
SLC25A33	237.94	220.354	198.719	197.572	211.531	166.144	183.816	165.98	115.135	116.322
AL954705.1	20.6514	6.76525	8.15921	9.31446	7.14624	4.35554	3.47956	2.55822	7.7851	4.48936
TMEM201	777.569	806.998	769.862	852.17	767.916	655.712	727.754	554.093	693.643	708.009
PIK3CD	689.576	852.422	382.7	441.753	377.309	450.501	276.756	288.433	211.037	213.928
PIK3CD.AS1	0	0	0	0	0.489003	0.551424	0	0	0	0
AL691449.1	0	0	0.34692	0	0.531889	0	0	0	0	0
PIK3CD.AS2	47.5879	70.5519	55.1449	41.1293	26.3716	34.4046	29.1861	30.2488	37.8477	22.5038
CLSTN1	3241.37	3578.82	3910.85	4235.39	3794.54	4088.71	3010.93	3689.58	2009.08	2806.71
MZT1P1	0	0	0	0	0.531889	0	0	0	0.357303	1.31263
AL357140.3	0	0	0.34692	0	0	0	0	0	0.357303	0.437545
CTNNBIP1	988.572	952.934	1283.71	1179.44	1226.85	1239.95	1527.61	1380.17	976.07	1358.96
AL357140.1	0	0	0	0	0	0	0	0	0	0
LZIC	253.204	320.866	399.506	328.835	489.024	486.953	780.066	579.052	828.61	972.672
AL357140.2	4.48943	3.86586	5.07864	2.82523	3.06267	1.64496	7.02013	0	2.28615	7.14311
NMNAT1	67.3414	53.1556	73.7118	74.167	83.859	82.5762	175.344	155.179	185.053	302.677
RN7SKP269	0.897886	5.79879	1.48941	3.13864	2.57367	0	3.47956	4.42576	5.14164	6.791
AL357140.4	0.897886	2.89939	1.69288	2.49415	2.04178	1.09354	2.33326	5.68443	8.1424	11.5082
MIR5697	0	0	0.448654	0.697475	0.531889	2.18708	0.573148	0	1.21424	0.466024
AL603962.1	0	0	0	0	0	0	0	0	0	0
RBP7	17.9577	2.89939	17.3826	12.5414	10.8266	10.3654	23.8448	18.7572	6.42852	2.24468
UBE4B	3124.64	2926.46	2713.11	2665.88	2468.24	2327.02	2656.2	2724.72	2540.05	2637.83
AL590639.1	0	0	0.448654	1.04621	0	0	1.76012	0	0	0
PGAM1P11	0.897886	0	2.59019	2.49415	1.06378	1.63565	2.90641	0	0.357303	0.437545
RNU6.828P	0	1.93293	1.83634	2.87822	0	1.64496	1.76012	0.649779	3.14309	10.0247
KIF1B	5458.25	5150.29	4327.34	4133.76	4095.98	4142.99	5730.54	5228.34	4589.74	5444.91
MIR1273D	0	0	0	1.0992	0.978006	0	0	0	0	0.437545
RNU6.37P	0	0.966465	1.48941	1.77901	1.50989	1.08423	4.66653	1.29956	1.21424	2.68223
RN7SL731P	0	0	0	0	0	0	0	0	0	0
AL139424.3	8.08097	21.2622	29.7231	26.8265	28.4992	19.1137	37.8443	40.9678	17.4961	28.676
AL139424.2	3.59154	0.966465	8.60786	20.7213	11.1011	18.0201	21.5318	18.0666	7.71246	14.1619
PGD	6156.8	6859.97	4533.45	4702.12	3223.13	3442.78	3040.57	3126.96	2462.95	2585.3
AL139424.1	1.79577	0	1.59115	0.348737	0.531889	1.09354	0	0	0	0
CENPS.CORT	2.69366	6.76525	5.2221	5.00597	5.06157	4.91627	2.31293	5.03465	1.78651	4.54632
CENPS	5.38731	6.76525	14.3621	11.5129	14.3354	8.17827	15.1662	11.9777	9.42634	8.62662
CORT	7.18308	9.66465	7.60882	12.1397	9.18802	9.29043	6.99979	3.85778	14.783	9.12112
DFFA	3068.08	3129.41	2455.8	2427.81	2228.1	2249.38	1819.58	2026.2	2199.81	1627.23
AL354956.1	0	0	0	0	0	0	0	0	0	0
PEX14	271.161	309.269	341.705	313.875	323.726	366.906	352.689	341.661	224.884	305.996
RN7SL614P	2.69366	0.966465	3.52922	1.43028	0.489003	3.82273	0	0.608882	2.92812	4.89843
CASZ1	123.01	129.506	99.0501	75.2969	292.232	114.298	871.213	573.5	1361.87	1878.17
AL139423.1	8.08097	5.79879	12.2205	4.9883	20.1176	4.93489	31.8688	11.0826	47.8463	75.2525
HSPE1P24	0	0	0	0	0	0	0	0	0	0
C1orf127	19.7535	20.2958	4.77344	4.60424	1.02089	0	0.573148	0	6.99786	31.2728
CFL1P6	0.897886	0	0.795574	2.11009	1.95601	0.551424	0.593484	1.21776	1.71388	2.33012
TARDBP	1960.08	2357.21	2699.62	2566.54	2367.47	2355.57	2185	1997.02	1998.98	2167.78
AL109811.4	0	0.966465	0	0	0.531889	0.542115	0	0.608882	0.499638	0
MASP2	42.2006	49.2897	86.1255	148.206	214.748	189.061	141.858	117.869	146.412	105.319
AL109811.3	12.5704	19.3293	43.3262	64.5522	62.8235	68.865	43.023	30.8986	49.2785	47.3377
SRM	3694.8	3336.24	1671.52	1782.9	1225.99	1478.89	1523.04	1103.19	691.505	640.612
EXOSC10	1933.15	1874.94	1504.17	1391.5	1185.34	1120.51	1187.28	1099.9	750.308	799.192
AL109811.1	0	3.86586	3.63095	5.68578	3.50879	3.27131	3.47956	3.08531	9.78365	8.13212
AL109811.2	0.897886	1.93293	5.12036	2.80756	1.9989	0.551424	4.68686	3.73509	0.714605	1.39807
MTOR	6601.26	6032.67	3647.43	3774.36	3491.44	3369.18	3514.56	3046.18	2559.62	2675.92
MTOR.AS1	0.897886	0	0.693841	2.87822	0.489003	1.10285	2.29259	0	3.07046	0.466024
RNU6.537P	0	0	0	0	0	0	1.16663	0.608882	0	0
ANGPTL7	1.79577	0.966465	8.24265	3.20929	5.55057	6.0005	15.1662	12.0186	4.642	3.58579
RNU6.291P	0	0	0.693841	0.366401	0.978006	0	0.593484	0	0.999275	0.932047
RPL39P6	0	0.966465	0	0	0	0	0	0	0	0
UBIAD1	975.104	809.897	431.637	456.54	394.33	392.553	416.223	334.109	331.084	331.182
UBE2V2P3	0.897886	0.966465	0.795574	2.12775	2.53079	4.93489	0	2.51732	0.499638	2.24468
AL031291.1	0	1.93293	0	0	1.46701	0.542115	0	0	0	0
MTCYBP45	0	0	0	0	0.489003	0	0	0	0.499638	0.466024
DISP3	214.595	236.784	765.715	344.17	68.6743	89.7633	43.4538	71.4211	3.21279	2.68223
LINC01647	0	1.93293	0.34692	0.715138	0.531889	0	0.573148	0	1.42921	0.466024
AL031731.1	9.87674	16.4299	5.01863	10.3607	9.23091	3.83204	4.64619	5.11644	11.4975	0.87509
FBXO2	604.277	805.065	730.834	555.34	355.219	378.672	501.96	511.307	375.421	255.169
FBXO44	549.506	562.482	458.644	542.124	383.718	381.945	442.137	484.185	515.344	481.498
FBXO6	44.8943	67.6525	46.2867	53.216	52.8719	58.5462	66.437	72.598	55.1289	29.2378
MAD2L2	4890.78	4434.14	1098.42	1200.44	921.222	793.807	628.099	737.853	340.508	277.929
DRAXIN	1039.75	1116.27	800.907	1038.09	272.741	254.513	133.528	221.929	13.4961	3.64275
AGTRAP	1113.38	1124.96	956.574	854.339	576.701	626.158	624.355	625.877	295.302	342.74
C1orf167	37.7112	50.2562	30.657	57.9969	19.1396	15.3375	1.1463	4.42576	0.357303	1.36959
AL953897.1	5.38731	1.93293	1.79461	3.24462	0	1.10285	0	0	0	0
MTHFR	618.643	599.208	441.88	483.808	370.507	391.983	882.713	641.627	2072.91	2358.29
CLCN6	588.115	585.678	610.129	697.405	677.623	666.003	1006.16	784.96	772.859	1013.38
NPPA.AS1	4.48943	1.93293	4.77344	3.20929	1.50989	2.18708	5.83316	8.11996	1.21424	1.36959
NPPA.AS1_1	0	0	0	0	0	0	0	0	0	0
NPPA.AS1_2	0	0	0	0	0	0	0	0	0	0
NPPA	0	4.83232	36.0826	6.8733	69.6952	33.3017	3172.19	106.009	2684.61	774.381
NPPA.AS1_3	0	0	0	0	0	0	0	0	0	0
NPPB	2.69366	5.79879	181.086	99.0121	976.839	2006.67	5190.35	1042.69	285.443	278.423
AL021155.1	0	0	0	0	0	0	0	0	0	0.87509
RNU5E.1	0	0	0	0.366401	0.489003	0	0.573148	0	1.07191	0
RNU5E.4P	0	0	0	0	0	0	0.573148	0	0	0.466024
KIAA2013	1652.11	1745.44	1376.15	1151.43	1171.74	1153.1	1194.96	1079.24	1147.12	1260.78
PLOD1	1661.99	1745.44	2750.96	2118.62	2061.56	2279.69	2751.84	2757.43	3506.26	3527.84
MFN2	2570.65	2337.88	1782.7	1727.99	1970.22	1997	3741.14	2760.6	6042.34	6552.79
AL096840.1	0	0	0.448654	0	0	0	0	0	0	0
MIIP	765.896	692.955	789.59	800.724	501.258	435.864	397.513	317.26	158.97	159.903
Y_RNA.3	0	10.6311	5.46729	9.19082	3.46591	3.28062	5.26001	3.69419	4.21207	1.83562
MIR6729	0	0	0	0	0	0	0	0	0	0
RN7SL649P	0	0	0	0	0.531889	0.542115	0.593484	0	0	0
TNFRSF8	590.809	503.528	96.1862	135.43	9.05937	12.5338	4.05271	7.47018	1.35658	0.437545
RNU6.777P	0	0	0	0	0	0	0	0	0	0
RPL23AP89	0	0	0	0	0	0	0	0	0	0
MIR7846	0	0	0	0	0	0	0	0	0	0
TNFRSF1B	31.426	68.619	90.2856	54.5271	43.8298	38.7974	26.8529	20.952	24.8513	1.36959
MIR4632	0	0	0	0	0	0	0	0	0	0
RPL10P17	0	0	0	0	0	0	0	0	0	0
SNORA70	0	0	0	0	0	0	0	0	0	0
VPS13D	2047.18	2061.47	1499	1495.33	1715.56	1813.57	2199.49	1999.85	4222.62	2905.37
SNORA59A	5.38731	4.83232	2.48846	3.22695	4.04068	3.262	4.07304	0.649779	37.0693	14.9801
AC243836.1	0	0	0	0	0.489003	0.542115	0	0	0	0
DHRS3	459.717	476.467	209.471	270.278	426.39	282.685	692.898	457.339	887.489	534.076
RNU6ATAC18P	0	0	0.448654	0.697475	0	0.551424	6.40631	0	2.64345	0.932047
MIR6730	1.79577	3.86586	0	0.697475	0	0	0	0	2.07118	0
AC254633.1	7.18308	13.5305	1.48941	3.27995	3.55168	0.551424	10.337	7.63376	24.279	10.5192
AADACL4	0	0	0	0.366401	0	0	0	0.608882	0.357303	2.27316
AC244670.1	0	0	0	0	0	0	0	0	0	0
AADACL3	74.5245	54.122	0.795574	4.30849	24.9475	15.2909	36.7997	27.527	0	0
C1orf158	0	0	0.34692	5.24872	1.02089	0	0.593484	0.608882	0.357303	0
PRAMEF12	8.08097	2.89939	0	0	0	0.542115	0	0	0	0.87509
PRAMEF1	0	0	0	0	0	0	0	0	0	0.437545
LINC01784	0	0	0	0	0	0	0	0	0	0
PRAMEF11	0	0	0	0	0	0	0	0	0	0
PRAMEF30P	0	0	0	0	0	0	0	0	0.499638	0
HNRNPCL1	0	0	0.34692	0	0	0	0	0	0	0
PRAMEF2	0	0.966465	0	0.348737	0	0	0	0.608882	0	0
PRAMEF4	0	0	0	0	0	0	0	0	0	0
PRAMEF10	0	0	0	0	0.489003	0	0	0	0	0.932047
PRAMEF7	0	0	0	0	0	0	0	0	0	0
RNU6.1072P	0	0	0	0	0	0	0	0	0	0
PRAMEF29P	0	0	0	0	0	0	0	0	0	0
PRAMEF6	0	0	0	0	0	0	0	0	0	0
PRAMEF28P	0	0	0	0	0	0	0	0	0	0
PRAMEF27	0	0	0	0	0	0	0	0	0	0
HNRNPCL3	0	0	0	0	0	0	0	0	0	0
PRAMEF25	0	0	0	0	0	0	0	0	0	0
PRAMEF34P	0.897886	0	0	0	0	0	0	0	0	0
PRAMEF35P	0	0	0.693841	0	0	0	0	0	0	0
HNRNPCL2	0	0	0	0	0	0	0	0	0	0
PRAMEF36P	0	0	0	0	0	0	0	0	0	0
AC245056.1	0	0	0	0	0	0	0	0	0	0
PRAMEF26	0	0	0	0	0	0	0	0	0	0
HNRNPCL4	0	0	0	0	0	0	0	0	0	0
PRAMEF9	0	0	0	0	0	0	0	0	0	0
PRAMEF13	0	0	0	0	0	0	0	0	0	0
PRAMEF18	0	0	0	0	0	0	0	0	0	0
PRAMEF31P	0	0	0	0	0	0	0	0	0	0
PRAMEF5	0	0	0	0	0	0	0	0	0	0
PRAMEF32P	0	0	0	0	0	0	0	0	0	0
RNU6.771P	0	0	0	0	0	0	0	0	0	0
PRAMEF8	0	0	0	0	0	0	0	0	0	0
PRAMEF33	0	0	0	0	0	0	0	0	0	0
PRAMEF15	0.897886	0	0	0	0	0	0	0.649779	0	0
AC243961.1	0	0	0	0	0	0	0	0	0	0
PRAMEF14	0	0	0	0	0	0	0	0	0.357303	0
PRAMEF19	0	0	0	0	0	0	0	0	0	0
PRAMEF17	0	0	0	0	0	0	0	0	0.714605	0
PRAMEF20	0.897886	0	0	0	0	0	0	0	0.357303	0
LRRC38	0.897886	2.89939	3.73268	1.79668	0.531889	0	0	0.649779	0	0
AL354712.1	0	0	0	0	0	0	0	0	0	0
BRWD1P1	0	0	0	0	0	0	0	0	0	0
PDPN	1294.75	1401.37	302.762	363.414	273.77	216.979	182.958	569.238	300.464	316.391
RNA5SP41	0	3.86586	0.448654	0	0.489003	0	0	0	0.357303	0
AL359771.1	0	0	0.448654	0.732802	0	0	0	0	1.07191	0
SCARNA11	0	0	0	0	0.489003	0	0	0	0	0
PRDM2	648.273	689.089	871.158	875.382	987.657	1011.89	1003.43	1022.42	919.928	954.502
KAZN	273.855	288.973	971.741	466.945	744.728	685.921	337.791	542.397	334.5	236.994
RNU6.1265P	0	0	0	0	0	0	0	0	0	0
AL357873.1	0	0	0	0	0	0	0	0	0	0
KAZN.AS1	0	0	0	0	0	0	1.76012	0	0	0
TBCAP2	0	0.966465	2.63191	4.2555	3.63745	3.27131	0.573148	1.82665	0.714605	3.67123
TMEM51.AS1	5.38731	6.76525	13.5248	14.2498	15.9739	9.82324	56.3681	21.3972	219.743	183.919
TMEM51	70.0351	83.116	90.2468	111.734	77.9052	59.6491	192.043	112.507	233.756	179.155
C1orf195	0	0	1.93807	0.366401	0.489003	0	1.73978	0.608882	6.28618	2.65375
AL035405.1	1.79577	0	0.34692	0.366401	0.531889	0	1.1463	0	4.642	1.86409
AL391094.1	0	0	0	0	1.06378	0	0	0	0.357303	0.437545
FHAD1	18.8556	12.564	67.0968	207.341	15.1847	18.5902	15.6783	14.536	30.7104	13.0305
AL031283.2	0	0	0	0	0	0	0	0	0	0
AL031283.3	0	1.93293	0.897307	2.86055	0	0	0	0.608882	3.07046	0.466024
AL031283.1	0	0.966465	1.79461	5.99919	0.978006	0	0.593484	2.51732	2.35585	1.36959
EFHD2	290.915	374.988	498.744	474.206	246.241	349.998	216.583	213.082	317.437	172.752
CTRC	0	0	0	0.697475	1.50989	1.09354	0.573148	0	1.92885	1.36959
CELA2A	0	0	0	1.77901	1.02089	0	0.573148	0	9.06904	5.91591
CELA2B	6.2852	2.89939	5.12036	4.71022	4.61545	2.71988	3.47956	4.34397	8.857	12.3263
CASP9	271.161	365.324	229.926	246.405	189.611	203.557	299.129	236.874	638.752	758.744
DNAJC16	734.47	748.044	712.635	632.769	702.065	624.504	764.7	691.682	855.599	989.268
SCARNA21B	0	0.966465	0	0.732802	0.531889	0	0.593484	0	2.92812	0.437545
AL121992.3	0	0	0.34692	0	0	0	0	0	0.499638	1.31263
AGMAT	64.6478	61.8537	22.2161	25.8288	15.7166	8.72039	9.33305	8.11996	2.92812	1.80714
AL121992.1	6.2852	1.93293	4.46824	4.32616	1.50989	3.28993	0.573148	0	0.714605	0.903568
CHCHD2P6	1.79577	3.86586	1.83634	1.43028	1.95601	0	1.73978	0.608882	3.42776	3.67123
RNU7.179P	0	0	0	0	0	0	0	0	0.499638	0.466024
CD24P1	0	0	0	0	0.489003	0	0	0	0	0
DDI2	1887.36	1761.87	1434.75	1436.67	1511.35	1363.02	1459.16	1534.54	1565.47	1303.27
RSC1A1	0	0	0	0	0	0	0	0	0	0
AL121992.2	0	0	0.693841	0	1.50989	0	0	0	0	0
PLEKHM2	2066.93	1768.63	2078.51	1892.68	2172.51	2187.52	1839.67	1809.46	1837.96	2338.34
AL450998.2	10.7746	17.3964	24.5011	29.6871	22.2452	16.3845	23.292	18.3119	34.4258	36.6372
SLC25A34	1.79577	3.86586	12.5674	9.55722	33.964	22.9643	50.1448	48.07	25.0662	46.7862
SLC25A34.AS1	0	0	0	0	0	0	0	0	0	0
TMEM82	4.48943	5.79879	8.89477	2.18074	7.10335	2.2057	3.49989	0	0	0
FBLIM1	2077.71	1828.55	1256.56	1199.7	1039.4	1186.27	1781.98	1306.2	1932	3003.2
RPL12P14	0	0	1.24423	0.366401	2.08467	0	0	0.649779	0.357303	0
UQCRHL	8.08097	10.6311	13.1178	12.8902	22.9486	16.3752	17.5401	22.4923	28.3546	22.9983
AL450998.1	1.79577	5.79879	16.6053	11.4069	13.2287	12.0569	10.4793	13.8453	6.71319	4.5748
FLJ37453	44.8943	48.3232	67.1151	62.429	48.1534	50.3494	47.2587	53.1092	97.485	130.647
SPEN	2862.46	2636.52	3675.73	3620.11	4207.15	3847.85	2160.65	2221.36	1340.4	1731.42
AL034555.1	0	0	0	0	0.531889	0	0	0	0	0.466024
ZBTB17	416.619	396.251	389.828	354.06	307.151	322.818	345.591	377.598	251.028	366.481
AL355994.4	0	0	0.795574	1.44794	2.57367	1.63565	3.43889	3.69419	0	1.36959
AL355994.1	0	0	0	0	0	0	0	0	0	0
AL355994.5	0	0	0	0	0	0	0	0	0	0
TBC1D3P6	0	0	0	0	0	0	0	0	0	0
SRARP	0.897886	0	1.79461	0.697475	5.55057	7.09404	4.05271	4.91196	0	1.31263
AL355994.3	0	0	0	0	0	0	0	0	0	0
HSPB7	8.08097	2.89939	5.2221	4.60424	562.383	197.184	7234.42	2305.54	29050.1	21451
CLCNKA	27.8345	16.4299	21.337	11.8616	147.129	71.6594	90.6312	56.3535	84.3433	85.6112
AL355994.2	0	0.966465	3.42748	2.82523	5.10446	8.76693	3.47956	2.43553	5.49894	9.03568
CLCNKB	49.3837	50.2562	43.6131	36.5957	191.096	134.992	80.6399	115.592	197.465	185.156
FAM131C	7.18308	8.69818	18.2982	21.1761	21.5245	29.5256	16.906	24.3599	53.4238	26.1465
EPHA2	1658.39	1289.26	3111.72	2254.41	1896.95	2464.49	2145.63	2225.86	873.4	715.067
AL451042.2	0	0	4.52826	2.87822	3.06267	4.91627	7.51193	5.64353	11.6428	4.89843
AL451042.1	1.79577	0	1.59115	2.16308	1.9989	3.82273	8.24777	1.94934	8.99934	9.1496
ARHGEF19.AS1	0	0	0	0	0	0	0	0	0	0
ARHGEF19	1163.66	1218.71	548.456	725.905	445.194	282.657	286.971	628.672	119.545	19.0034
ANO7L1	2.69366	7.73172	5.12036	5.75643	8.16713	1.08423	2.90641	4.38487	27.1374	7.63761
RSG1	48.4858	38.6586	67.7307	51.8917	80.7963	84.8191	126.2	126.112	122.548	126.329
MT1XP1	3.59154	0.966465	0	1.0992	1.46701	3.28993	3.54057	1.29956	0.357303	0.903568
FBXO42	924.822	778.004	676.699	704.706	792.307	773.544	866.584	791.507	930.586	908.441
SZRD1	1151.09	1240.94	1237.22	1243.06	1034.93	1130.11	1352.63	1322.84	1133.25	1339.1
AL358794.1	0	0	1.59115	2.12775	0.978006	2.18708	1.16663	1.25866	0.357303	1.80714
SPATA21	1.79577	2.89939	1.48941	4.67489	2.57367	0.551424	1.16663	2.51732	4.85697	1.36959
NECAP2	289.119	347.927	616.04	549.429	576.16	582.305	559.983	621.733	295.305	283.254
LINC01772	27.8345	30.9269	49.8211	60.3497	47.0039	55.1818	29.6169	31.9118	66.1326	97.5284
CROCCP3	98.7674	145.936	325.942	327.807	235.715	272.124	219.55	177.717	281.893	387.631
RNU1.1	0	0	0.448654	0	0	0	0	0	1.35658	0
AL137802.2	2.69366	0.966465	2.59019	0.715138	0.489003	1.09354	2.37394	6.7795	0.85694	0.437545
AL137802.1	0	0.966465	0	1.76135	1.59567	0	0	0.608882	0	0
LINC01783	12.5704	15.4634	3.97787	1.83201	20.5465	34.4232	16.3939	23.3466	5.57158	4.10878
RNU1.6P	0	0	0	0	0	0	0	0	0	0
FAM231B	0	0	0	0	0	0.551424	0	0	1.21424	0
AL355149.1	0	0	0	0.348737	0	0	0	0.608882	0.357303	0
NBPF1	580.932	453.272	408.061	426.628	394.159	379.786	341.925	342.07	579.498	559.757
AL137798.1	1.79577	0.966465	3.32575	1.06388	2.04178	0.551424	0.593484	0	0.714605	0
CROCCP2	345.686	347.927	563.089	578.975	518.021	501.935	326.396	354.052	277.739	282.817
AL137798.3	0	0	0	0	0	0	0	0	0	0
MST1P2	11.6725	8.69818	93.8726	82.7794	53.4467	40.9565	23.8651	24.6052	17.5658	16.2927
AL137798.2	0	0	0.795574	0.366401	0	0	0	0	0	0
RNU1.3	0	0	0	0	0	0	0	0	0	0
FAM231A	0	0	0	0	0	0	0	0	0	0
AL021920.2	20.6514	10.6311	2.28499	2.19841	8.52748	9.29974	1.16663	0.608882	1.92885	0.466024
EIF1AXP1	3.59154	7.73172	2.28499	3.57569	3.01979	4.39278	2.33326	1.25866	1.07191	2.71071
ESPNP	27.8345	16.4299	19.279	17.1986	28.6278	44.8258	12.2191	9.9875	12.2818	1.31263
AL021920.1	0	0	0.34692	0	1.06378	0	0	0	0.357303	0
FAM231C	0	0	0.34692	0	0	0	0	0	0	0
AL021920.3	0	0	0.448654	0.348737	0	0	0	0	0	0
CROCC	1795.77	1919.4	1554.77	2246.6	1156.41	1222.61	410.983	580.965	214.677	205.377
CROCCP4	0	2.89939	0.693841	0	1.55278	2.16846	0	0	1.42921	0.903568
RNU1.4	0	0	0.448654	0	0	0	0	0	0	0
MST1L	40.4049	60.8873	131.672	128.981	73.9074	69.463	24.4789	22.2515	17.6414	8.97873
BX284668.1	0	0	0	0	0	0	0	0	0	0
BX284668.3	0	0	0	0	0	1.08423	0	0.649779	0	0
MIR3675	0	0	0	0	0	0	0	0	0	0
BX284668.2	30.5281	21.2622	9.89381	10.7271	63.4067	97.2971	48.9375	72.6752	39.1375	22.7031
RNU1.5P	0	0	0	0	0	0	0	0	0	0
BX284668.5	6.2852	18.3628	19.7276	12.8902	5.99669	8.2062	12.1581	14.2497	16.0001	14.8662
BX284668.4	6.2852	4.83232	5.81421	5.99919	2.4879	4.35554	2.33326	2.55822	2.07118	0.466024
RNU1.2	0	0	1.14249	0	0.489003	0.542115	0	0	0	0
BX284668.6	0	0.966465	3.42748	3.20929	3.01979	2.7385	1.73978	1.90844	3.07046	3.58579
MFAP2	1446.49	1409.11	2134.75	2141.17	1220.75	1412.17	699.983	1043.09	733.849	742.146
AL049569.1	4.48943	0.966465	3.12228	3.92443	2.57367	3.29924	1.78045	2.47643	2.21352	1.86409
ATP13A2	4097.95	3841.7	1903.15	2069.01	1648.47	1847.32	2075.36	1823.26	1063.32	1111.54
SDHB	583.626	767.373	613.721	499.537	651.449	598.662	1596.06	1223.61	1619.31	1457.78
PADI2	199.331	259.979	26.9661	74.07	96.0067	145.478	50.2668	114.052	81.8481	73.8259
AL590644.1	0	0	0	0	0	0	0	0.649779	0.357303	0
AL590644.3	0	0	0	0	0	0	0	0	0	0
PADI1	3.59154	5.79879	4.9169	3.90677	15.3991	10.4026	5.87383	5.68443	27.7126	9.85382
PADI3	123.01	115.009	16.6053	32.7949	33.2004	28.9741	1.16663	22.0879	0.999275	0.466024
MIR3972	0	0.966465	0	0	0	0	0	0	0	0
PADI4	1.79577	0	0	0	0	1.09354	0.593484	0	0.714605	0
PADI6	0	0	0	0	0.531889	1.10285	0.593484	0	0.499638	0
AC004824.1	0	0	0	0	0	0	0	0	0	0
RCC2	7765.81	7738.48	4254.82	4635.13	3113.81	3374.6	1651.93	2104.49	907.64	769.708
ARHGEF10L	1859.52	1733.84	1310.3	1056.66	712.291	640.151	880.278	784.914	1011.3	1075.03
AL136529.1	0	0	0	0	0	0	0	0	0	0
ACTL8	0	0.966465	0	0.715138	0	0	0	0.649779	0	0
AL357509.1	0	0	0	0	0	0	0	0	0	0
LINC01654	0	0	0	0	0	0	0	0	0	0
IGSF21	385.193	330.531	26.8461	49.9759	202.686	255.141	33.3608	73.1251	0	0
AL365209.1	12.5704	5.79879	0.693841	2.51182	3.14845	4.93489	4.07304	1.94934	0	0
AL359738.1	0	0.966465	0	0.732802	0	0	0	0	0	0
AL591896.1	0.897886	0	0	0	1.06378	0	0	0.649779	5.21427	1.34111
KLHDC7A	518.978	346.961	88.3167	86.6685	38.0904	39.9933	37.946	32.1163	35.2769	32.0055
DYNLL1P3	0	0	0	0	0	0	0	0	0	0
AL031737.1	0	0	0	0	0.489003	0	0	0	0.499638	0
PAX7	2.69366	1.93293	52.1661	59.8904	3.10556	1.10285	0	0	0	0
TAS1R2	0	0	0	0	0.489003	0	0	0	0	0
AL080251.1	2.69366	0	0	0	0.531889	0	0.593484	0	0.999275	0.466024
ALDH4A1	655.457	685.223	441.601	621.15	650.437	465.259	814.109	614.181	630.831	985.071
MIR4695	0	0	0	0	0	0	0	0	0	0
MIR1290	0	0	0	0	0	0	0	0	0	0
IFFO2	287.323	236.784	310.655	462.623	280.831	464.335	318.572	490.101	134.769	126.976
AL137127.1	7.18308	9.66465	13.9734	18.8893	12.6968	6.00981	8.14608	4.95285	17.2144	25.9653
UBR4	20376.6	17853.5	9044.17	10831.6	10521.3	10880.3	9370.51	9175.38	14739.7	16142.6
AL035413.1	3.59154	3.86586	1.48941	4.69256	5.55057	8.17827	2.92675	3.77598	7.42779	10.8428
EMC1	2531.14	2138.79	2672.51	2725.62	2600.74	2827.22	2633.35	2758.97	1370.65	1808.82
MRTO4	483.96	498.696	424.346	474.586	285.704	303.555	345.408	273.089	161.822	165.99
AKR7L	3.59154	8.69818	17.1974	23.1272	25.2906	20.2444	12.7719	9.41951	7.28546	7.20007
AKR7A3	16.1619	13.5305	29.3762	44.0428	23.5407	33.9183	20.4466	19.5297	12.0669	11.604
AL035413.2	32.3239	19.3293	79.2156	86.673	66.0405	74.9586	52.9495	59.925	76.5612	49.1733
AKR7A2	492.041	557.65	810.786	719.512	704.664	769.226	694.329	731.187	544.834	581.396
RNU6.1099P	3.59154	0.966465	5.77248	4.71022	3.06267	5.43046	6.36563	5.72532	2.42849	4.51784
PQLC2	407.64	357.592	340.002	342.083	302.519	299.032	388.817	361.227	225.895	298.312
CAPZB	3895.03	4175.13	2685.8	2504.95	2849.96	2967.9	3233.19	2959.97	1748.65	2968.8
RN7SL277P	0.897886	0	0.34692	0.366401	0	0.551424	0.593484	0	0	0
RNU4.28P	0	0	0	0	0	0	0	0.649779	0	0
AL031727.2	0	0	0	0	0	0	0	0	0.357303	0.466024
MINOS1	43.0985	55.0885	77.6896	100.102	65.6801	63.9581	186.519	125.375	142.488	132.579
MINOS1.NBL1	0	0	0	0	0	0	0	0	0	0
AL031727.1	12.5704	8.69818	13.9734	7.81353	6.61435	3.262	4.62585	10.0693	12.8541	5.91591
NBL1	26.0387	28.0275	49.349	49.3269	23.3518	30.0491	26.2797	48.8015	6.71612	5.94439
HTR6	15.2641	24.1616	2.97883	4.23784	2.9769	1.63565	0	1.94934	0.357303	0
TMCO4	241.531	205.857	79.3722	78.1883	36.9838	46.957	44.2507	90.8236	39.8521	9.99621
RNF186	3.59154	0	0	0	0	0	0	0	0.499638	0
AL391883.1	0	0	0	0	0	0	0	0	0	0
OTUD3	509.999	603.074	880.447	1020.11	866.72	987.671	551.366	610.901	515.852	440.923
PLA2G2E	0	0	0	0	0	0	0	0	0	0
RN7SL304P	0	0	0	0	0	0	0	0	1.21424	0
PLA2G2A	15.2641	7.73172	0	0	0.489003	1.62634	7.0608	0	0.85694	0
PLA2G5	0.897886	1.93293	0	0	0	0	0	0	1.71388	0.437545
PLA2G2D	0	0	0	0	0	0	0	0	0	0
PLA2G2F	0	0	0.795574	0	0	0.542115	0	0	1.85622	0
Z98257.1	0	0	0.34692	0	0	0	0	0	0	0
PLA2G2C	0	0	0	0	0	0	0	0	0.499638	0
UBXN10.AS1	0	1.93293	0.795574	1.43028	1.06378	0	0.593484	1.25866	0.499638	0
UBXN10	21.5493	21.2622	42.1237	89.6083	14.8244	14.7302	14.5727	16.8897	4.2847	8.48422
LINC01757	0	0	0	0	0	0	0	0	0	0
Z98257.2	0	0	0	0	0	0	0	0	0.357303	0
VWA5B1	29.6302	31.8933	39.3352	152.368	2.04178	1.64496	0	0	1.07191	1.34111
AL020998.1	0	0	0	0.715138	0	0	0	0	0	0
LINC01141	0	0	0.448654	6.38325	0.531889	0	0	0	1.07191	0
AL139254.1	0	0	0	0	0	0	0	0	0	0
AL139254.2	0	0	0	0	0	0	0.573148	0	0	0
AL139254.3	0	0	0	0	0	0	0	0	0	0
CAMK2N1	22.4471	21.2622	154.816	372.454	192.966	213.305	249.005	110.521	82.92	10.7004
MUL1	713.819	722.916	487.77	479.407	542.128	551.032	795.643	649.424	802.803	885.155
RPS4XP4	0	0	0	0	0	0	0	0	0.85694	0
FAM43B	12.5704	23.1952	14.0986	14.7928	3.95491	1.64496	1.1463	6.25241	10.4256	1.77866
CDA	202.922	145.936	112.99	113.274	10.6979	10.9261	3.54057	16.4444	0	0
PINK1	538.731	505.461	242.037	164.972	238.709	305.014	495.981	424.287	550.609	989.143
MIR6084	0	0	0	0	0	0	0	0	0	0
PINK1.AS	47.5879	58.9543	67.6055	73.2706	60.1641	65.6775	116.521	110.517	57.6329	106.877
DDOST	3852.83	4085.25	4857.3	4313.87	3720.75	4349.77	4767.19	4911.5	2612.9	3439.52
KIF17	636.601	672.659	419.387	351.637	238.031	268.964	64.1241	115.838	160.048	66.2841
AL663074.2	4.48943	0	0.795574	1.08154	0.489003	1.09354	0	0.649779	0.85694	0
SH2D5	225.369	279.308	148.297	185.45	53.4467	75.4356	44.8848	65.6549	29.8535	4.46088
AL663074.1	0	0	0	0	0.489003	0	0	0	0.499638	0
HP1BP3	1836.18	1935.83	2827.82	2848.53	3764.73	3753.93	2453.02	3025.61	2187.64	2110.12
EIF4G3	2535.63	2334.01	2448.33	2502.26	2758.73	2642.06	2556.04	2588.85	1761.12	2322.94
RNU7.200P	0	0	0	0	0	0.551424	0	0.608882	0.499638	0.932047
MIR1256	2.69366	2.89939	0	0.348737	0	0	0.593484	1.21776	0.714605	0.437545
RPS15AP6	0	0	1.04076	1.06388	2.04178	1.08423	1.73978	1.94934	2.35585	0.437545
AL627311.1	0	0	0	0.366401	2.12755	1.09354	1.16663	0	0.999275	1.31263
HSPE1P27	0	0	1.93807	2.86055	1.46701	2.18708	1.16663	0	4.00003	0.437545
ECE1	1638.64	1432.3	4124.26	3037.13	3193.87	3374.32	3390.69	3016.49	1844.52	2516.66
AL031005.1	0.897886	0.966465	4.42652	0.697475	2.57367	3.85066	2.92675	1.29956	5.64128	3.61427
AL031728.1	0	0	6.60978	4.69256	8.2529	6.03774	8.20709	10.0284	14.141	9.91077
PPP1R11P1	0	0	0	0	0	0	0	0	0	0
AL592309.1	0	0	0	0	0	0	0	0	0	0
AL592309.2	0	0	0	0	0	0	0	0	0	0
NBPF2P	14.3662	16.4299	17.6044	15.3666	6.16823	10.4026	6.38597	10.8827	10.8556	6.73404
HS6ST1P1	5.38731	4.83232	3.42748	2.49415	2.04178	3.80411	1.18697	2.51732	0.499638	0.932047
CROCCP5	0	1.93293	1.38768	1.76135	0.489003	1.08423	0	0	0	0.437545
NBPF3	501.02	602.108	533.185	515.438	386.652	342.624	259.728	355.874	324.522	242.669
PFN1P10	0	0	1.7346	0.732802	0	1.09354	0	0.608882	0.357303	0.437545
ALPL	5895.52	5265.3	3691.86	2552.68	1635.32	2145.41	263.415	391.362	13.3537	12.0985
AL359815.1	0	0	0.34692	0.732802	0.531889	1.09354	0	0	0	0
RAP1GAP	243.327	248.381	231.893	249.751	319.685	228.091	155.04	141.942	220.455	195.59
USP48	2283.32	2202.57	1153.57	1256.15	1253.43	1350.99	1321.29	1295.43	1463.98	1514.24
AL590103.1	0	0	0	0	0	1.63565	0	0	0	0
LDLRAD2	12.5704	9.66465	9.19997	10.6741	11.633	7.65478	13.9182	8.76973	18.4983	10.8143
HSPG2	8748.1	7728.82	16666.1	19744.4	18879.4	33893.7	26214.1	21060.6	24028.3	19970.2
AL590556.1	0	0	0.34692	0	0	1.64496	0.573148	0	4.215	0.932047
AL590556.2	0	0	0	0	0	0	0.573148	0	0	0
CELA3B	0	0	0	0	0.531889	0.542115	0	0	0	0
RN7SL386P	0	0	0	0	0	0	0.593484	0	0	0
RNU6.1022P	0	0	0	0	0	0	0	0	0	0
CELA3A	0	0	0.34692	0	0	0.542115	1.1463	0	0	0.437545
RN7SL186P	0	0	0	0	0	0	0	0	0	0
RNU6.776P	0	0	0	0	0	0	0	0	0	0
LINC01635	0	0.966465	0.693841	0	0.489003	0	0	0	0	1.39807
LINC00339	174.19	155.601	128.625	122.88	122.481	108.784	119.529	147.263	141.843	130.399
CDC42	2575.14	2680.97	2194.93	1841.4	3024.9	3369.76	4281.02	4077.05	2550.33	3364.27
CDC42.IT1	0	0	0	2.89588	7.67813	2.18708	2.94708	5.60263	12.1424	6.26802
AL031281.1	0	0	2.83538	2.91354	1.55278	1.08423	5.85349	4.38487	9.49898	5.53533
AL031281.2	0	0	3.97787	2.49415	6.16823	3.30855	7.04046	4.42576	7.28546	4.54632
WNT4	20.6514	15.4634	65.7794	38.0391	29.6059	25.1514	68.994	83.2307	26.2805	3.11977
MIR4418	0	0	0	0	0	0	0	0	0	0
PPIAP34	0	0.966465	0	0	0	0	0	0.608882	0	0
AL591122.1	0	0	0	0.366401	0	0	0	0	0	0
ZBTB40	931.107	703.586	1142.76	1259.27	872.7	879.992	1019.88	876.919	863.294	943.848
ZBTB40.IT1	2.69366	1.93293	7.20189	7.0454	8.74191	4.39278	5.85349	2.51732	4.99931	5.85896
EPHA8	111.338	123.707	29.478	37.3815	27.0494	15.8889	6.36563	13.0319	4.5723	4.10878
MIR6127	0	0	0	0	0	0	0	0	0	0
C1QA	1.79577	0	0	0	0	0	0	0	0.357303	0
C1QC	0	0	0	0	0	0	0	0	0	0
C1QB	0	0	0	0	0	0	0	0	0.357303	0
EPHB2	474.981	418.479	2967.75	1861.4	5496.11	4489.5	1383.27	1017.59	361.937	883.027
MIR4684	0	0	0	0.366401	0.489003	0.551424	0	0	0	0
AL512444.1	0	0	1.59115	0.715138	4.04068	3.28993	0.573148	0.608882	0.85694	0.466024
MIR4253	0	0	0	0	0.531889	0.542115	0	0	0	0
LACTBL1	0	0	0	0	0	0	1.18697	0	0	0
TEX46	0.897886	0.966465	0.34692	1.79668	0.489003	3.29924	0.573148	0	0.999275	0
KDM1A	4095.26	4401.28	5249.37	4770.84	4986.96	5210.54	3261.18	3733.16	2417.68	2111.25
AL031428.1	0.897886	0	0.448654	1.04621	1.55278	0.542115	0	1.21776	0.85694	1.77866
MIR3115	0	0	0.448654	0.366401	0	0.542115	0	0	0.357303	0
MIR4419A	0	0.966465	0	0	1.59567	0	0	0.608882	0	0
LUZP1	2813.97	2733.16	2320.83	2510.79	2820.95	3358.17	2846.87	2752.23	1724.93	2076.9
AL161672.1	0	2.89939	4.56998	5.05896	8.12425	11.4682	5.75181	3.73509	17.1388	15.2183
RNU6.514P	0	0	0.693841	2.47649	2.53079	1.63565	5.23967	3.81688	2.42849	1.80714
RNU6.135P	0	0	1.48941	3.20929	2.04178	6.01912	5.26001	0.608882	5.28398	2.30164
HTR1D	234.348	285.107	82.818	88.8755	15.7166	13.6367	5.26001	13.9271	15.9972	3.23369
AL109936.1	0	0	0.34692	0.366401	0	0	0	0	0.357303	0
LINC01355	62.852	61.8537	190.875	283.111	124.978	156.937	127.594	92.6093	434.806	339.514
AL109936.8	8.08097	9.66465	28.5624	34.0839	14.7815	20.1793	11.707	8.97422	50.3533	29.8747
HNRNPR	3230.59	3424.18	4212.25	3855.79	4234.81	3912.45	3163	3366.6	2344.38	2328.26
ZNF436	62.852	54.122	270.529	279.566	228.002	228.559	574.291	453.85	3129.92	2886.84
ZNF436.AS1	3.59154	6.76525	130.586	146.992	78.7975	86.9876	86.0867	120.3	308.168	279.946
Y_RNA.4	0	0	0	0	0	0	0	0	0	0
AL109936.2	0	0	0.34692	1.0992	0.531889	0.542115	4.09338	2.51732	21.7808	22.2086
TCEA3	0	1.93293	37.632	52.0416	40.3038	43.7881	141.122	96.6352	1269.6	862.89
AL357134.1	0	0	1.04076	0	0	0	0.573148	0	16.7118	4.43241
ASAP3	2012.16	1843.05	1801.9	1769.88	1482.86	1409.16	1282.27	1226.17	1680.09	1527.18
E2F2	137.376	114.043	137.968	121.189	128.718	128.935	71.1645	84.6938	32.4911	55.1461
AL021154.1	3.59154	0.966465	6.71151	3.64635	7.72101	4.89765	4.05271	5.64353	7.42779	4.92691
ID3	367.235	245.482	2146.21	2001.88	1684.2	1738.59	1425.26	2190.43	143.405	505.827
MDS2	0	0	1.48941	2.14541	0.489003	0	0.573148	1.25866	0.85694	0.932047
AL451000.1	0	0	0	0	0	0	0	1.29956	0.499638	0
RPL11	5653.99	6857.07	9370.19	7694.84	5865.8	5556.9	5832.07	6002.72	4345	3861.15
ELOA	1113.38	976.129	818.45	868.566	893.624	875.73	1042.16	903.878	989.215	856.945
ELOA.AS1	27.8345	32.8598	17.1374	17.8431	16.3772	20.7214	12.8329	21.9243	34.5711	32.5
PITHD1	723.696	591.476	723.883	676.375	769.461	743.486	614.798	634.32	559.356	477.913
LYPLA2	2262.67	2321.45	1641.66	1693.24	1474.69	1627.28	1868.46	1664.52	790.337	934.026
GALE	415.721	352.76	513.064	484.797	392.657	412.602	731.946	540.288	411.149	331.068
HMGCL	329.524	328.598	427.586	417.389	390.084	419.123	435.995	538.948	433.156	419.256
FUCA1	216.39	222.287	186.618	233.731	159.13	217.109	285.333	386.441	248.69	304.78
CNR2	0	1.93293	0	0.348737	1.50989	0	0	0	0.999275	0.87509
BTBD6P1	0	0	0	0	0	0.551424	1.1463	0.608882	0	0
AL590609.3	0	0	0	0	0	0	0	0	0	0
MIR378F	0	0	0	0	0	0	0	0	0	0
AL590609.2	0	0	0	0	0	1.08423	0	0.608882	0	0
PNRC2	1330.67	1565.67	1367.26	1207.59	1510.46	1489.78	1292.72	1523.85	1023.68	969.143
SRSF10	3340.13	3188.37	2816.37	3161.46	4183.63	3697.59	3453.51	3167.22	2855.76	2990.07
AL590609.1	0	0	0	0.366401	0	0	0	0	0	0
AL591178.1	0	0	0	0	0	0	0	0	0.357303	0
MYOM3	2.69366	0.966465	4.46824	2.86055	2.04178	1.62634	0.593484	3.08531	22.783	38.825
AL591178.2	0	0	0	0	0	0	0	0	0	0
IL22RA1	8.97886	7.73172	1.59115	1.79668	0	7.6827	0.573148	1.21776	0.357303	0.437545
IFNLR1	251.408	243.549	199.18	187.203	178.87	157.321	163.267	158.669	216.533	283.34
AL590683.1	0	0	0	0	0	0.551424	0	0	1.42921	0
AL138902.1	0.897886	0	1.24423	0	0.531889	0	0	0	0	0
GRHL3	68.2393	57.0214	77.549	38.4055	234.273	57.4527	87.8061	154.774	53.4238	2.27316
STPG1	243.327	233.884	174.338	171.006	130.734	147.142	105.875	144.782	142.691	73.8933
NIPAL3	476.777	449.406	232.68	225.212	489.668	479.494	629.961	707.491	1268.15	1653.46
RCAN3	457.024	439.741	502.062	610.962	373.835	475.99	403.549	475.488	249.248	252.963
AL445686.2	0	0	0	0	0.489003	0	0	0	0	0
NCMAP	15.2641	21.2622	1.14249	4.72789	7.67813	4.38347	2.92675	10.0693	11.3552	12.6784
AL445686.1	0	0	0	0	0	0.542115	0	0	0	0
Y_RNA.5	0	0	0	0	0	0	0	0	0	0
SRRM1	1595.54	1732.87	2118.84	2147.37	2046.61	2052.67	1391.11	1459.31	2312.58	1590.96
AL445648.1	0	0	0	0	0.489003	0	0	0	0	0
CLIC4	11007.2	9496.48	4780.52	4158.5	7020.95	6555.65	9205.33	9677.97	17668.2	10769.5
RNU6.1208P	0.897886	0	0.448654	0.348737	2.04178	1.08423	1.78045	0.608882	1.92885	1.77866
RUNX3	21.5493	19.3293	38.2527	28.2568	16.2056	19.6837	12.2395	19.5706	17.9987	0.437545
MIR6731	0	0	0	0	0	0	0	0	0	0.437545
AL445471.1	2.69366	2.89939	0.693841	0.697475	1.06378	1.63565	0	1.25866	1.57155	0
AL445471.2	0	0	0	0	0	0	0	0	0	0
MIR4425	0	0	0	0	0	0	0	0	0.499638	0
AL050344.1	0	0	0	0	0	0	1.18697	0	0.499638	0.466024
AL121994.1	0	0	0	0	0	0	0	0	0	0
AL031432.1	0	0	0	0	0	0	0	0	0.357303	0
SYF2	105.053	109.211	228.382	185.097	227.084	186.583	261.655	252.909	266.459	257.033
AL031432.4	5.38731	17.3964	21.5222	21.0524	6.78589	7.10335	1.1463	5.11644	26.2078	21.1627
AL031432.5	4.48943	7.73172	8.79304	10.6741	8.52748	3.81342	0.593484	3.85778	8.71467	10.2914
RSRP1	325.932	361.458	499.615	567.431	360.186	347.718	591.909	513.248	832.531	1002.65
AL031432.3	2.69366	0	2.14153	3.20929	0.489003	0.542115	3.47956	0.608882	3.00076	3.67123
AL031432.2	2.69366	3.86586	2.73364	1.04621	2.4879	2.72919	0	0.649779	8.35737	8.10364
RHD	1.79577	5.79879	9.69034	11.1465	13.1429	11.4682	11.0322	9.5422	8.85407	10.4338
SDHDP6	3.59154	3.86586	1.83634	4.27317	5.14734	3.85997	9.29238	6.94309	5.49894	7.98972
AL928711.1	0	0	0.795574	2.49415	1.46701	1.10285	1.1463	0	2.07118	4.05182
TMEM50A	855.685	806.998	943.211	1004.38	1208.39	1153.48	1436.88	1300.14	675.546	976.03
RHCE	4.48943	3.86586	5.01863	6.5069	9.99449	6.60778	11.0118	15.7946	53.7055	21.6002
AL031284.1	0.897886	4.83232	0.34692	1.77901	1.02089	0.542115	2.3536	1.90844	3.9274	8.07516
TMEM57	412.129	414.613	293.157	271.81	332.768	323.641	339.453	336.826	340.322	356.045
LDLRAP1	508.203	566.348	309.739	340.009	253.001	236.747	295.609	269.149	296.879	279.555
AL606491.1	1.79577	4.83232	1.38768	2.49415	2.57367	1.10285	2.88607	2.51732	21.6414	7.25703
MAN1C1	191.25	189.427	90.8623	53.5693	105.066	57.3038	298.678	124.117	2840.77	3276.13
AL031280.1	1.79577	2.89939	0.34692	1.08154	0.489003	0.542115	1.18697	0.649779	14.1381	8.18907
SELENON	3554.73	3534.36	4878.13	3717.94	3215.49	3379.14	3345.94	3034.46	2261.41	3825.06
AL020996.2	0	0	0	0	0	0	0	0	0	0
AL020996.1	2.69366	0.966465	9.48688	6.40092	12.9714	5.44908	11.646	18.0257	21.7837	24.72
MTFR1L	453.432	428.144	514.595	495.493	738.937	562.191	1730.79	1249.97	3024.27	3077.45
AL020996.3	0	0	0	0	0	0	0	0	0	0
AUNIP	444.453	312.168	247.697	242.326	160.64	170.022	82.1967	122.008	25.1389	50.6568
AL033528.2	0	0	0	0	0	0	0	0.608882	0.357303	0
PAQR7	161.619	138.204	263.113	267.232	245.349	267.982	261.858	269.84	278.451	225.949
Y_RNA.6	0	0	0.897307	0.732802	0	1.08423	0.573148	0.608882	0	0
STMN1	2678.39	3054.03	5707.25	5084.82	4954.25	4356.82	3458.83	4215.56	1440.25	3574.77
SNRPFP2	0	0	1.24423	0.697475	0	2.72919	0	2.59912	0.85694	0.466024
AL033528.1	0	0	0.34692	0.366401	1.55278	1.08423	1.18697	0.608882	0.357303	1.36959
MIR3917	0	0	0	0	0	0	0	0	0	0
PAFAH2	234.348	265.778	271.218	277.765	350.629	308.462	349.562	344.305	297.236	282.931
RNU6.110P	0	0	0	0	0.489003	1.09354	0	0.608882	0.357303	0.437545
SCARNA17	0	0	0	0	0	0	0	0	0	0
SCARNA18	0	0	0	0	0	0.542115	0	0.649779	0.85694	0
EXTL1	35.0175	40.5915	74.0301	95.2986	100.493	78.6324	153.239	125.984	467.134	692.322
SLC30A2	4.48943	1.93293	2.59019	4.32616	24.5872	13.1504	15.2476	6.94309	25.0692	40.0237
AL391650.2	0	0	0	0	0	0	0.573148	0	2.57082	2.33012
TRIM63	0	0	0	0	6.03958	3.29924	99.062	33.2523	1399.93	1400.1
PDIK1L	83.5034	88.9148	95.6489	116.28	156.9	125.71	121.74	105.482	195.778	175.758
FAM110D	3.59154	1.93293	30.237	24.6104	25.3079	22.4036	39.011	27.2862	12.8541	52.7591
C1orf232	0	0	0.34692	3.57569	0	1.63565	0	1.21776	0	0.932047
AL391650.1	4.48943	5.79879	4.18134	4.58658	6.21112	4.39278	4.09338	1.94934	3.07046	3.17673
ZNF593	0	0.966465	1.24423	0.715138	0.489003	0.542115	1.18697	0	0.714605	1.31263
CNKSR1	256.795	223.253	334.35	433.652	320.346	302.331	241.269	279.178	124.12	64.6297
CATSPER4	2.69366	6.76525	2.93711	5.33704	3.01979	2.2057	2.3536	0	0.499638	0.437545
AL355877.1	19.7535	24.1616	9.69034	10.4843	4.08357	7.11266	5.85349	4.46666	33.6386	4.92691
AL355877.3	0.897886	0	0	0	0.489003	0	0	0.608882	0.714605	0
CEP85	1119.66	1136.56	886.71	898.651	903.069	822.921	578.958	599.573	794.808	859.941
AL355877.2	0.897886	1.93293	0.795574	3.59336	1.55278	1.63565	1.76012	0.649779	5.21427	7.17159
SH3BGRL3	706.636	739.345	1019.88	917.204	638.847	800.864	879.006	997.873	195.33	183.339
UBXN11	293.609	295.738	407.981	533.92	317.369	314.939	350.05	324.694	206.961	294.822
CD52	1.79577	4.83232	6.9567	4.97064	4.52968	4.37416	1.1463	4.46666	0	0
CRYBG2	257.693	304.436	52.1975	51.7726	47.8532	62.3597	130.663	171.95	50.1266	0
AL451139.1	0.897886	0	0.795574	0	1.02089	3.262	1.16663	1.29956	0.357303	0
ZNF683	0	0	1.34596	1.04621	0	0	0	0	0	0
LIN28A	49278.7	47788.8	31314.8	29441.5	28245	30262.1	7808.63	10364.6	5.92888	3.58579
DHDDS	858.379	813.763	580.372	618.485	565.016	660.347	724.6	731.237	554.043	604.05
AL513365.1	0	0	1.24423	3.92443	4.12645	2.19639	4.66653	3.81688	0.85694	3.64275
AL513365.2	6.2852	0.966465	7.54881	5.00597	2.04178	2.17777	3.5609	5.68443	11.5702	12.1839
HMGN2	719.206	824.394	1655.8	1495.92	1490.28	1331.09	935.374	1112.89	648.007	1126.53
DPPA2P2	0	0	0	0	0	0	0	0	0	0
RPS6KA1	1420.46	1578.24	801.148	853.35	705.822	733.006	652.35	742.519	303.374	205.12
MIR1976	0	0	0	0	0	0	0	0	0	0
RN7SL679P	0	0	0	0	0.531889	0	0	0	0	0
Y_RNA.7	0	0	0	0	0	0	0	0	0	0
RNU7.29P	0	0	0	0	0	0	0	0	0	0
AL627313.1	0	0	0	0	0	0	0	0	0	0
snoU13	0	0	0	0	0	0	0	0	0	0
AL627082.1	0	0	0	0	0	0	0	0	0	0
AL512408.1	0	0.966465	3.08056	1.08154	4.08357	5.4677	5.23967	7.42928	6.07122	8.54118
ARID1A	6172.96	5366.78	9115.98	8757.29	10697.4	10132.6	6941.43	6183.18	5043.31	5241.88
PIGV	275.651	314.101	279.831	223.834	210.389	186.332	228.334	239.264	200.178	173.666
RN7SL165P	0	0	0.448654	0	0.531889	0	0	0	0.999275	1.36959
ZDHHC18	877.234	849.522	1171.58	1147.4	1003.93	1070.17	776.956	799.359	529.979	310.048
SFN	53.8731	56.055	28.7658	35.7922	26.6891	31.1798	141.675	83.1126	68.2038	0.466024
AL034380.1	0	0	0	0	0	0	0	0	0	0
GPN2	509.999	485.165	498.582	436.711	473.016	491.569	595.722	488.524	595.408	600.599
GPATCH3	162.517	180.729	166.891	183.508	152.688	168.414	178.617	154.565	102.406	122.181
NUDC	1096.32	1211.95	1222.44	1219.74	1116.32	1129.63	1306.61	1062.23	727.014	702.997
NR0B2	1.79577	0	1.48941	0.715138	0.978006	1.64496	2.94708	1.94934	9.28401	5.42141
KDF1	385.193	388.519	210.512	242.834	146.133	211.072	138.707	161.39	34.4984	6.76252
RPL12P13	0	0	0.34692	0.715138	1.06378	2.18708	0	0.649779	0	0.437545
AL356390.1	0	0	2.14153	0.732802	0.489003	1.63565	0	0	0.357303	0
OSTCP2	0	0	0.448654	1.39495	0.531889	0	0.593484	0	0	0
TRNP1	109.542	104.378	59.4046	43.6058	69.9954	50.8356	231.668	87.4974	319.017	233.017
FAM46B	3290.75	3684.16	443.925	720.105	896.609	941.763	590.356	596.724	187.905	192.955
SLC9A1	717.411	599.208	631.915	546.824	713.037	717.774	783.594	696.276	473.139	401.433
AL590640.2	0	0	0	0	0	0	0	0	0	0
CHCHD3P3	0.897886	0	0.34692	0	1.02089	0.551424	0	0	0.499638	0
NPM1P39	7.18308	2.89939	3.52922	0.715138	0.531889	1.64496	1.78045	0	1.07191	1.75018
SNRPEP7	0	0	0	0	0	0	0	0	0	0.466024
AL590640.1	0	0	0	0.366401	0	0	0	0	0	0
WDTC1	909.558	879.483	1430.42	1293.37	2094.27	2160.41	1737.11	1730.93	1763.89	1894.7
Y_RNA.8	0	0	0	0	1.02089	0	0	0	0.357303	1.77866
FO393419.3	0.897886	0	0	1.08154	1.02089	0.542115	2.29259	2.43553	2.78579	1.31263
TMEM222	657.252	527.69	774.803	828.156	645.735	666.433	620.112	533.554	656.533	609.691
RNU6.48P	0	0	1.59115	3.62868	5.55057	2.7385	2.3536	4.38487	4.3544	1.36959
ACTG1P20	8.97886	9.66465	16.8505	22.2046	21.9277	28.9555	21.6945	8.07906	18.4954	14.8092
SYTL1	261.285	216.488	173.404	211.421	177.824	239.327	221.103	560.872	311.299	91.5271
MAP3K6	490.246	453.272	281.33	261.926	341.055	375.075	339.164	349.213	373.06	220.31
FCN3	2.69366	3.86586	2.73364	4.69256	8.87056	34.4511	44.393	17.0124	9.21431	2.62527
CD164L2	45.7922	36.7257	26.6426	31.9561	7.23201	10.4026	6.40631	13.0319	2.85549	2.30164
FO393419.1	0	0	0	0	0	0	0	0	0	0
GPR3	255.897	238.717	110.663	136.909	150.749	174.994	96.2369	102.115	29.7053	20.373
WASF2	4044.08	3957.67	3405.58	3011.74	3740.66	3981.76	3148.26	3461.25	2499.2	1935.06
FO393419.2	0	0	0.448654	0	0	0.551424	0	0	1.57155	0.437545
BX293535.1	0	1.93293	6.20285	5.00597	3.59456	1.08423	1.16663	2.47643	16.9965	21.9523
AHDC1	806.301	773.172	2286.2	1931.98	1922.01	2054.64	1490.37	1929.41	1312.74	1281.88
FGR	21.5493	4.83232	2.77536	1.81434	1.95601	0.551424	0	0	0	0
AL031729.1	0	0	0	0.732802	0	0	0.593484	0	0.357303	0
LINC02574	0	0	0	0	0	0	0	0	0	0
IFI6	39.507	44.4574	28.4372	25.7097	45.5113	45.9287	57.8194	66.9136	53.3482	83.7471
AL445490.1	1.79577	0.966465	0.795574	0.366401	1.06378	0.542115	1.71944	0	1.21424	4.10878
RNU6.949P	0	0	0	0	0	0	0	0	0	0
CHMP1AP1	0	0	0	0	0	0	0	0	0	0
RNU6.424P	0	0	0	0	0	0	0	0	0	0
FAM76A	331.32	257.08	160.573	179.729	207.747	182.163	209.112	173.486	202.976	167.836
AL020997.1	1.79577	0.966465	0.448654	0.715138	2.08467	1.08423	1.1463	0	2.99783	0
RPEP3	0	0	0.795574	2.12775	0	0.551424	0.573148	0	0	0
STX12	247.816	290.906	291.561	298.275	573.123	520.815	661.988	581.334	871.489	814.128
AL020997.2	0	0	1.34596	0.715138	0	0	0	0	1.21424	0.932047
AL020997.3	0	0	1.38768	1.08154	0.489003	1.09354	2.33326	1.82665	5.14164	7.69457
RNU6.1245P	0	0	0	0	0	0	0	0	0	0
PPP1R8	752.428	697.788	749.702	651.473	759.921	731.045	683.171	678.378	428.238	519.42
SCARNA1	3.59154	0.966465	2.63191	3.90677	4.70123	5.47701	5.30068	5.60263	6.21355	3.55732
THEMIS2	380.704	326.665	167.373	140.255	95.3461	84.1653	41.3646	43.2807	9.21431	5.77352
RPA2	714.717	630.135	750.617	711.73	657.42	627.477	589.21	585.805	590.996	582.356
SMPDL3B	1744.59	1612.06	159.303	268.777	89.8385	124.626	95.5824	180.066	79.0564	195
AL512288.1	12.5704	10.6311	2.69192	1.44794	2.57367	0	1.78045	1.94934	1.35658	2.2162
XKR8	489.348	599.208	471.467	412.873	286.081	317.005	263.886	240.318	199.037	232.256
EYA3	834.136	738.379	1056.31	994.237	1092.23	1047.62	926.635	897.003	908.654	1204.97
AL512288.2	0.897886	2.89939	2.63191	1.79668	1.55278	3.28062	2.3536	1.21776	2.92812	2.71071
RN7SL559P	0.897886	1.93293	1.14249	2.87822	2.57367	3.81342	4.68686	4.34397	4.35733	5.01234
SPCS2P4	13.4683	0.966465	11.0963	7.81353	6.12535	3.28993	4.60552	8.76973	8.78437	10.7289
AL137792.2	0	0	0	0	0	0	0	0	0	0
AL137792.1	0	0	0	0.348737	0	0	0	0	0	0
RNU6.176P	0	0	0	0	0	0	0.573148	0	0	0
PTAFR	45.7922	61.8537	11.9936	26.3541	11.7188	18.0387	26.8529	39.9546	3.21279	3.61427
DNAJC8	1776.92	1844.98	1990.86	1712.22	1800.65	1768.48	1885.17	1766.47	1220.21	1385.55
ATPIF1	438.168	462.937	539.375	428.588	420.316	386.143	761.42	781.293	949.959	1193.03
AL353622.1	27.8345	34.7927	42.5775	52.6775	20.2034	36.1333	34.3445	40.6816	109.909	79.571
AL353622.2	0	0	0	0.366401	0	0	0	0	0.999275	0
SESN2	3345.52	2852.04	649.385	545.571	637.723	776.797	1005.52	1060.8	596.196	594.569
MED18	76.3203	88.9148	130.354	150.43	75.7777	99.6145	125.996	103.819	75.1987	97.3187
PHACTR4	1748.18	1603.36	1309.16	1333.94	1214.02	1205.52	1149.4	1155.97	912.883	1076.45
Y_RNA.9	0	0	0	0.366401	0.531889	0.551424	0	0	0.357303	0
CR391992.1	0	0	1.48941	1.41261	0.489003	2.72919	0.593484	0.608882	1.71388	1.34111
RNU6ATAC27P	0	0	2.14153	2.14541	1.06378	0	0.593484	1.29956	3.42776	1.77866
RCC1	1880.17	2133.95	1697.53	1603.54	1367.38	1425.89	783.838	726.852	323.726	224.761
SNHG3	1075.67	1219.68	647.892	846.737	483.894	589.548	364.81	398.991	228.612	175.844
SNORA73A	0	0	0	0	0	0	0	0	0	0
SNORA73B	12.5704	25.1281	7.36363	20.1828	24.2268	36.124	14.6134	17.6622	3.00076	2.18772
PRDX3P2	2.69366	3.86586	6.16113	6.41858	2.61656	1.63565	1.1463	0	2.42849	0.466024
AL513497.1	2.69366	4.83232	7.85401	11.9984	26.4574	12.001	12.8329	8.72884	12.7844	3.64275
TRNAU1AP	171.496	184.595	354.656	342.167	340.858	273.001	286.686	311.78	218.192	263.529
SNHG12	182.271	154.634	137.653	178.581	99.6441	87.4459	78.8595	56.6398	77.0549	52.1507
SNORD99	1.79577	0.966465	2.0398	3.54036	1.06378	2.72919	1.76012	0.649779	0.999275	2.24468
SNORA61	0	0	0	0	0	0	0	0	0	0
SNORA44	0	0	0	0	0	0	0	0	0	0
SNORA16A	0	0	0	0	0	0	0	0	0	0
SNORA16A.1	0	0	0	0	0	0	0	0	0	0
TAF12	280.14	255.147	206.499	179.098	217.424	239.017	224.688	267.563	173.762	180.03
RAB42	129.296	98.5794	68.688	55.591	54.4247	39.3488	31.4787	33.6976	38.8528	17.6338
LINC01715	0.897886	0	1.04076	0.732802	0	0	0	0.608882	2.42849	2.24468
RNU11	0	0	0	0	0	0	0	0	0	0
AL360012.1	0	0	0	0	0	0	0	0	0	0
GMEB1	572.851	557.65	529.134	521.993	427.128	415.966	303.491	303.537	229.895	239.598
SCARNA24	0	0	0	0.715138	0.531889	1.10285	1.1463	0.608882	1.57155	0
YTHDF2	2242.92	2335.95	1945.94	1981.96	2090.98	1989.3	1806.08	1726.26	1160.7	1195.73
OPRD1	79.9118	71.5184	38.3076	42.2991	56.149	58.4438	28.1008	21.9243	9.64131	7.20007
AL009181.1	1.79577	0	0	0	0	0	1.1463	0	1.71388	1.80714
Y_RNA.10	0	0	0	0	0	0	0	0	0	0
EPB41	2522.16	2202.57	2164.29	2254.59	2170.36	2025.59	1742.72	1638.65	1043.02	1018.88
AL138785.1	1.79577	0.966465	1.83634	1.08154	1.50989	1.09354	0.573148	1.21776	0.714605	0
Y_RNA.11	0	1.93293	0	0	0.531889	0	0	0	0	0
Metazoa_SRP	0	0	0	0.366401	0	1.09354	0	1.29956	0.714605	0.466024
TMEM200B	280.14	220.354	633.509	610.357	530.006	633.085	492.705	367.525	179.917	637.862
AL357500.1	0	0	0.795574	1.04621	0.531889	0.542115	0	0.649779	0.357303	1.75018
SRSF4	1701.49	1769.6	2063.86	2011.76	2258.97	2173.5	1951.98	1845.92	1269.55	1662.95
uc_338	0	0	0	0	0	0	0	0	0	0
MECR	418.415	405.915	339.267	387.614	327.938	388.104	326.124	328.061	444.491	315.811
AL590729.1	5.38731	3.86586	3.03884	2.51182	3.63745	3.28993	5.15833	2.51732	5.71391	4.0803
PTPRU	3711.86	3308.21	2795.76	3145.96	1960.83	2238.98	1165.95	2484.54	1972.25	642.846
LINC01756	0.897886	0	0	0.732802	0	1.64496	0	2.59912	1.21424	0
AL671862.1	0	0	0	0	0	0	0	0	0	0
AC092265.1	0	0	0	0	0	0	0	0	0	0
AL645944.2	0	0	0	0.348737	0.531889	0	0.593484	0	0.357303	0
AL645944.1	0	0	0	0	0	0	0	0	0	0
LINC01648	0	0.966465	0	1.08154	0	1.08423	0	0	0	0.932047
AL137076.1	0	0	0.34692	0.366401	0.489003	0	0	0	0	0
AL021921.1	0	0	0	0	0	0	0	0	0	0
AL161638.2	0	0	0	0	0	0	0	0	0	0
AL161638.1	0	0	0	0	0	0	0	0	0	0
MATN1	0	1.93293	1.83634	0.697475	2.4879	1.65427	7.57294	6.17062	28.0699	7.17159
MATN1.AS1	0	0.966465	2.28499	1.77901	3.99779	5.44908	14.5117	11.855	30.8499	16.2642
LAPTM5	0.897886	0	4.22306	3.5227	8.91345	16.4124	30.9666	17.5804	15.0647	0.466024
MIR4420	0	0	0	0	0	0	0.573148	0	0	0
AL137027.1	0	0	0	0	0	0	0	0	0	0
LINC01778	0	0	0	0	0	0	0.593484	0.608882	1.57155	0.466024
RN7SKP91	0	0	0	0	0.531889	0	0	0	0.357303	0
AL445235.1	0	0	0	0	0	0	0.593484	0	0	0
SDC3	1213.94	1155.89	2864.79	2273.64	1772.05	2070.03	3455.2	1961.96	2471.36	3114.43
RN7SL371P	0	0	0	0	0	0	0	0	0.357303	0
PUM1	3956.08	4234.08	4619.96	4360.24	5009.54	4812.52	3903.88	3976.48	4022.31	4183.4
AL356320.2	0.897886	0	0.693841	2.86055	3.50879	2.7385	1.73978	1.86754	2.71316	2.73918
AL356320.1	0	0	0	1.08154	0	1.63565	1.1463	0.649779	0.357303	0
SELENOWP1	0	0	0.897307	1.44794	1.9989	1.63565	3.47956	4.50756	1.07191	2.27316
AC114495.1	0	0	0	0	0.531889	0	0	0	0	0
NKAIN1	731.777	749.977	613.337	541.157	403.707	355.952	148.857	190.094	23.4976	13.582
SNRNP40	1160.97	1203.25	1109.24	1044.03	964.494	975.27	679.02	771.55	484.148	382.057
AC114495.2	0.897886	6.76525	10.5459	15.2607	12.1649	10.9168	15.8207	7.59287	18.9283	14.9801
ZCCHC17	545.914	593.409	589.974	457.781	507.777	523.096	770.058	691.891	492.854	528.238
AL451070.1	0	0	0	1.79668	0	1.10285	0	1.25866	6.14092	0.87509
FABP3	76.3203	106.311	44.3121	52.4701	142.093	88.0718	786.703	392.498	3349.83	3838.99
SERINC2	893.396	811.83	414.692	460.434	318.175	378.86	458.51	671.757	335.014	273.61
AC209007.1	0	2.89939	0.693841	1.79668	0	0.542115	0	0	0.999275	0.466024
RNU6.40P	0	0	0	0	0	0	0	0	0	0
LINC01225	0.897886	0	0.34692	0	0	1.09354	0	0	1.35658	0
Y_RNA.12	0	0	0	0	0	0	0	0	0	0
LINC01226	0	0.966465	2.08152	0	1.02089	2.17777	0	1.25866	3.42776	0
AC114488.1	0	0	0	0.366401	0	0	0	0	0	0.437545
TINAGL1	264.876	308.302	53.8721	63.1487	178.759	113.737	332.51	203.867	601.953	264.528
HCRTR1	11.6725	7.73172	4.18134	3.59336	6.70012	3.83204	5.81282	8.24265	6.42559	4.89843
PEF1	988.572	1167.49	1003.55	890.599	1183.86	1276.66	1404.34	1236.81	1223.84	1328.73
AC114488.2	2.69366	1.93293	10.4442	6.12283	2.4879	7.08473	6.44698	3.1671	31.2856	21.8565
AC114488.3	0	0	0	0.348737	0.489003	0	0	0.608882	0.499638	0
COL16A1	198.433	134.339	280.485	349.494	67.8851	43.1995	187.112	57.6985	1012.28	596.842
ADGRB2	865.562	754.809	3393.69	1690.74	1140.95	868.766	1357.66	888.279	4855.58	4533.36
MIR4254	0	0	1.04076	1.39495	0.489003	1.08423	0.573148	0.608882	1.92885	1.36959
AL354919.2	0	0	0	0	0	0.551424	0	0	0.499638	0
SPOCD1	87.0949	83.116	71.4633	65.1659	59.5721	60.1354	43.3484	46.1615	10.9282	14.9231
AL354919.1	0	0	0	0	0	0	0	0	1.85622	0.903568
AL136115.2	0	4.83232	4.67171	1.41261	3.99779	0.551424	1.18697	3.81688	4.56937	3.14825
PTP4A2	3173.13	3054.03	3531.5	2842.55	3484.12	3351.56	3613.96	3537.68	3633.97	4084.27
AL136115.1	0	2.89939	5.61074	2.16308	3.55168	6.54262	6.48765	5.64353	6.71319	10.0532
AL136115.3	0	0	0	0.366401	0	0	0	1.21776	0.357303	0
KHDRBS1	4337.69	4717.31	5157.12	4520.67	5105.55	4929.95	3680.93	4064.06	2986.44	2713.95
AL445248.1	0.897886	0.966465	6.26286	5.73877	8.78479	11.9917	8.78024	1.25866	17.1388	7.20007
TMEM39B	443.555	403.982	388.321	402.009	364.004	373.963	253.525	279.259	179.536	197.892
MIR5585	0	0	0	0.348737	0.489003	0	0	0	0.999275	0.437545
Metazoa_SRP.1	0	0	0	0	0.531889	0	0	0	0.357303	1.36959
KPNA6	3490.08	3700.59	2903.69	2690.41	3526.91	3704.64	3554.84	3529.97	3326.78	3464.38
AL049795.2	0	0	0	0	0	0	0	0	0	0
TXLNA	2841.81	2461.59	1705.94	1788.09	1703.76	1826.73	1674.86	1664.19	1811.91	1601.95
CCDC28B	130.193	109.211	156.97	143.31	136.036	138.365	185.23	206.661	169.683	254.141
AL049795.1	2.69366	5.79879	2.73364	8.52867	5.06157	4.91627	3.54057	3.77598	3.28543	6.02983
IQCC	44.8943	53.1556	87.5966	111.102	99.4041	92.3994	85.8999	71.7028	62.2808	77.6965
DCDC2B	4.48943	9.66465	19.6442	31.082	13.6319	9.31836	17.0483	20.6248	26.6407	35.2392
TMEM234	64.6478	34.7927	106.589	113.937	80.3073	93.4743	123.602	112.221	84.0645	177.423
EIF3I	1959.19	2067.27	2049.26	1909.16	1701.13	1753.21	2350.14	2027.69	1462.01	1525.23
MTMR9LP	211.003	230.985	181.659	203.033	137.546	144.329	109.643	133.382	70.4144	30.0844
FAM167B	25.1408	54.122	27.6416	29.3737	19.3112	28.9648	15.2069	15.7537	29.0663	10.8143
LCK	2026.53	1942.59	168.938	277.941	32.1366	43.2088	4.74787	38.9776	0.357303	0
Metazoa_SRP.2	0	0	0	0	0	0	0	0	0	0
Y_RNA.13	0	0	0	0	0.489003	0	0	0	0	0
HDAC1	2493.43	2280.86	3744.47	3202.43	2622.83	2317.24	1485.13	1680.05	1146.49	1216.32
MARCKSL1	5640.52	5788.16	5956.69	5813.56	4210.54	4916.03	3232.88	3274	1646.7	1799.4
AL109945.1	0	0	0.448654	0	1.02089	0	0	0	2.21352	2.33012
TSSK3	2.69366	10.6311	13.0578	13.2919	12.3365	18.6088	13.3654	12.2231	51.062	38.4444
FAM229A	52.9753	39.6251	100.923	126.465	120.036	133.244	118.874	109.585	142.415	118.52
BSDC1	1387.23	1542.48	1180.05	1231.32	1216.22	1360.01	1561.41	1407.25	1427.99	1717.53
GAPDHP20	5.38731	1.93293	1.24423	0.366401	0	1.63565	1.78045	0.649779	2.42849	1.80714
AL356986.1	0	0	0	1.06388	0	0	0	0	0	0
LRRC37A12P	22.4471	8.69818	4.97691	4.58658	1.9989	0.542115	0.593484	0.608882	2.07118	0.903568
RN7SL122P	1.79577	0	0	0	0	0	0	0	0	0
AL033529.1	0.897886	0	1.04076	0.366401	0.531889	0	0	0	1.35658	0
ZBTB8B	214.595	194.259	274.804	272.146	232.909	192.875	129.479	166.425	258.767	221.509
ZBTB8A	145.457	161.4	201.225	169.227	254.434	294.125	148.8	171.26	151.417	158.735
ZBTB8OS	201.126	184.595	192.623	217.804	183.752	191.79	291.353	303.21	239.821	253.628
Y_RNA.14	1.79577	0.966465	3.4692	4.30849	2.08467	2.72919	1.73978	1.25866	6.14385	8.10364
RBBP4	3987.51	4531.75	5896.69	5658.28	6059.52	5830.3	3816.93	4246.11	4899.65	4498.45
SYNC	3.59154	0.966465	1.93807	2.89588	3.19133	2.7385	2.96742	6.12972	43.0649	51.4749
AC114489.1	0	0	0	0.366401	0	0.542115	0	0	1.07191	0
KIAA1522	3929.15	3688.03	2609.61	2143.63	1943.71	2403.01	1674.25	2164.73	1464.39	855.092
YARS	4007.26	2946.75	1658.96	1557.03	1659.46	1828.86	1736.18	1884.92	1773.76	1403.29
S100PBP	1178.92	1036.05	1038.41	1028.71	1253.23	1049.76	831.381	845.212	1125.37	1108.41
FNDC5	19.7535	16.4299	174.88	105.068	68.1424	62.9111	38.5395	66.1365	348.165	416.032
HPCA	9.87674	11.5976	6.87326	3.55803	4.61545	7.65478	1.73978	2.51732	1.21424	0.466024
TMEM54	106.848	116.942	393.09	181.358	690.843	598.829	292.19	311.535	107.76	83.5943
RNF19B	496.531	403.016	358.501	316.418	425.3	462.765	346.185	398.55	402.559	357.29
AL031602.1	0	0	0	0	0.978006	0	0.593484	0	0.714605	0.903568
AL355864.1	0	0	0.448654	0.366401	0	0.542115	0	0	1.71388	1.31263
AL355864.2	0.897886	0	0	1.39495	0.978006	0	1.16663	0	2.07118	1.80714
AL020995.1	0	1.93293	0.693841	1.06388	1.50989	0	1.18697	1.21776	7.35516	4.51784
AK2	1296.55	1284.43	1184.72	1230.04	924.439	881.027	1162.76	984.51	2217.71	1929.65
Metazoa_SRP.3	1.79577	0.966465	0	0.348737	0.489003	0.551424	0.573148	0.608882	2.92812	3.14825
AZIN2	9.87674	23.1952	74.2804	64.9055	58.2766	66.6221	65.9859	98.9844	96.9883	114.031
AL662907.1	2.69366	6.76525	7.14188	19.8694	8.21002	10.4026	2.31293	19.4888	11.6428	2.73918
TRIM62	304.383	312.168	165.093	277.063	126.462	176.041	185.783	324.771	93.5606	87.8274
AL662907.2	6.2852	17.3964	11.6101	24.9415	8.78479	11.5241	5.30068	26.6364	7.42779	12.5645
AL662907.3	0	1.93293	0	0.366401	0.531889	0.551424	0.593484	0	0.714605	0.437545
ZNF362	365.439	328.598	373.675	331.983	544.83	444.5	456.133	607.443	484.107	742.971
AL513327.3	0.897886	0.966465	9.75035	3.55803	9.54837	8.73901	8.73957	9.37862	7.28546	14.5425
A3GALT2	0	0	0	0	1.46701	1.09354	0.593484	2.43553	0.357303	1.39807
AL513327.1	0	5.79879	38.391	32.7551	46.1718	47.0501	45.5393	44.4985	93.3427	114.973
PHC2	72.7287	106.311	859.066	673.201	1129.71	1340.89	1231.18	1131.65	851.358	917.979
MIR3605	2.69366	0	0	0.697475	0	0	0.573148	0	0.85694	1.39807
RN7SKP16	0	0	3.32575	1.74369	0.489003	2.72919	2.92675	3.1671	8.21503	7.66609
AL513327.2	0	0	2.18326	3.64635	2.4879	2.16846	1.1463	4.38487	3.78506	1.36959
TLR12P	0	0	0	0	0	0	0	0	0.85694	0
ZSCAN20	153.538	128.54	156.475	137.042	150.603	130.738	125.793	143.124	118.415	123.504
AC115285.1	0	0.966465	0.693841	1.08154	1.02089	1.64496	1.18697	0.608882	1.57155	0
CSMD2	1042.45	903.644	363.955	362.372	71.5053	76.4826	18.6864	41.2541	13.3537	9.0072
HSPD1P14	0.897886	0.966465	0	0.348737	0	0	0	0	0	0
HMGB4	0	0	1.04076	0	0	0	0	0	0	0
CSMD2.AS1	4.48943	1.93293	0.795574	0.715138	0	0	0	1.25866	0	0
RNA5SP42	0	0	0	0.366401	0	0	0	0	0	0
C1orf94	249.612	202.958	8.14092	9.24381	1.02089	3.28062	2.37394	0.649779	0	0
AC115286.1	0	0	0	0	0	0	0	0	0.357303	0
MIR552	0	0	0	0	0	0	0	0	0	0
SMIM12	347.482	330.531	352.283	349.579	347.524	399.384	571.67	391.276	292.467	404.959
GJB5	7.18308	6.76525	2.83538	2.11009	2.57367	4.89765	4.11371	2.55822	2.78579	0
GJB4	0.897886	2.89939	2.28499	1.76135	3.50879	2.19639	1.18697	0	4.14237	0.437545
AL121988.1	0	0	0	0	0	0	0.593484	0	0.499638	0
GJB3	18.8556	7.73172	7.71055	5.33704	6.78589	7.08473	8.22743	7.55197	10.568	2.2162
GJA4	20.6514	36.7257	97.7619	19.2028	78.5229	82.9787	30.1291	17.8257	12.5665	6.26802
AL122010.1	17.0598	9.66465	14.0751	19.503	13.2716	16.9173	16.9263	11.0417	19.7852	18.9465
DLGAP3	296.302	200.058	138.56	202.993	53.1465	73.9582	22.2067	42.0629	2.50112	5.77352
AC114490.1	26.0387	39.6251	78.3366	95.5681	69.5064	81.0895	49.7954	51.7687	121.982	87.2759
AC114490.2	0	0	0	0.715138	0.489003	0.551424	0	0	2.64345	1.80714
TMEM35B	5.38731	9.66465	2.63191	4.22018	2.4879	1.63565	1.16663	1.86754	0.357303	3.20521
ZMYM6	152.641	147.869	114.341	133.66	118.312	113.709	175.958	187.418	340.755	324.744
RPL12P45	0	0	0	0	0	0	0	0	0	0
ZMYM1	737.164	693.922	520.065	525.878	666.342	610.579	519.375	583.728	316.891	276.645
EFCAB14P1	0	0	0	0	0	0	0	0	0	0
AL590434.1	0.897886	1.93293	0.34692	0	3.01979	1.10285	4.66653	3.73509	1.92885	8.13212
SFPQ	5213.12	4681.55	7939.78	9606.84	11133.2	9872.52	4476.02	4602.82	3427.08	4314.05
Y_RNA.15	0	0	0	0	0	0	0	0	0.357303	0
ZMYM4	2892.09	2336.91	3298.01	2967.57	2814.87	2806.51	2494.16	2542.96	2344.29	2555.81
RN7SL503P	0.897886	0.966465	0.795574	0.366401	0	0.542115	0.593484	0	0.499638	1.36959
SNORA62	0	1.93293	0	0	0.531889	0	0	0	0	0
RPL5P4	11.6725	6.76525	9.38514	11.4069	12.2078	9.30905	10.459	8.85153	8.00006	9.53019
ZMYM4.AS1	0	0	0.693841	1.79668	0.531889	1.09354	0.573148	0.608882	1.07191	2.27316
Metazoa_SRP.4	0	0	0	0	0	0	0	0	0	0.466024
KIAA0319L	3103.99	2874.27	1651.93	1797.61	1532.54	1679.07	1955.89	1984.54	2141.43	2699.01
AC004865.1	0	0	0	0.348737	1.02089	0	0.593484	0	0.357303	0.466024
NCDN	946.371	890.114	617.882	780.732	483.508	539.115	634.627	572.523	867.271	989.762
AC004865.2	6.2852	1.93293	5.36555	3.92443	4.57257	4.92558	3.47956	2.47643	21.4932	9.50171
TFAP2E	11.6725	16.4299	24.0524	22.9727	20.5465	13.6739	10.4793	16.6852	65.9176	40.6606
PSMB2	1401.6	1554.08	1207.16	1097.27	1245.63	1187.02	1764.75	1878.68	1041.96	1162.94
C1orf216	634.805	546.053	552.371	546.052	323.486	310.246	177.165	203.576	157.326	132.949
CLSPN	550.404	552.818	641.681	631.992	665.81	652.357	296.141	323.926	89.5576	125.358
AL354864.1	0	0	0	1.08154	0.489003	1.65427	0	0	0	0
AGO4	735.368	630.135	1153.74	1070.42	2245.71	2039.86	1367.18	1385.42	1924.5	2659.64
AGO1	3302.42	3211.56	3173.52	3327.71	2998.32	3426.98	2217.77	2400.77	1685.32	1614.13
AL139286.1	0	0	0	0	1.50989	0	0.593484	0	0	0.437545
AL139286.2	0	0	0	0	0	0	0	0	0	0
AGO3	546.812	598.242	982.204	1001.04	1260.02	1305.81	1093.4	1131.28	1930.46	1743.21
AL138787.2	1.79577	0.966465	6.01767	7.42947	4.65834	5.4677	4.66653	1.90844	5.64128	4.13725
AL138787.1	0	0	1.93807	2.47649	1.06378	2.72919	0.593484	3.12621	0.357303	0
TEKT2	11.6725	18.3628	63.0721	106.003	41.9852	41.5173	17.5605	34.5927	10.5012	10.3768
ADPRHL2	378.908	416.546	399.232	382.36	369.752	400.899	570.568	415.84	374.579	396.118
COL8A2	117.623	109.211	31.356	42.82	27.3068	19.6837	8.71923	10.0693	69.4848	8.16059
TRAPPC3	288.221	342.129	449.035	444.268	342.779	382.683	531.598	494.45	555.002	626.31
MAP7D1	940.086	872.718	2418.73	2290.16	2587.65	2747.86	2808.82	2441.66	1955.53	2101.27
RN7SL131P	0	0	0	0.348737	0	0	0	1.21776	0	0
THRAP3	4147.33	4380.02	3290.1	3184.23	2971.85	2797.25	2512.11	2508	2398.04	1980.44
UBE2V2P4	0	0	0	0	0	0	0	0.608882	1.07191	0.437545
SH3D21	185.862	204.891	299.459	417.822	232.609	221.988	434.15	225.905	693.585	384.56
EVA1B	86.197	98.5794	308.163	248.652	188.985	217.428	150.987	150.549	127.551	78.8771
AL591845.1	160.722	165.265	146.492	287.631	148.621	136.094	218.119	112.998	456.273	265.012
STK40	1020	881.416	580.565	561.269	558.994	625.898	1174.27	973.586	1003.01	1171.49
LSM10	286.426	260.945	166.142	152.916	138.43	157.46	289.162	212.509	169.253	222.84
RNU4.27P	0	0	0.34692	0	0	0	0	0	0	0.87509
OSCP1	24.2429	14.497	95.0671	93.0694	72.0973	74.3793	128.451	134.799	118.476	137.342
SNORA63C	0	0	0.448654	0.715138	0	0	0.593484	0.649779	0.357303	0.437545
MRPS15	612.358	681.358	600.293	516.166	438.357	477.849	662.626	590.149	393.295	397.513
CSF3R	0	0	203.831	78.5814	114.34	151.9	95.8709	53.5954	176.245	13.5535
FTLP18	0	0	0	0	0	0	0	0	0	0
AL596257.1	0	0	40.5194	51.6489	0	0	1.16663	0	0	0
AC117945.2	3.59154	0	365.476	514.608	0	1.65427	0	0	0	0
AC117945.1	0	0	2.93711	7.48246	0	0	0	0	0.357303	0
GRIK3	188.556	179.762	2653.85	5124.43	76.4209	125.701	16.1905	26.3501	2.35585	2.71071
AL031430.1	0	0	0	0	0	0	0	0	0	0
MIR4255	0	0	0	0	0	0	0	0	0	0
RNU6.636P	0	0	0	0	0	0	0	0	0.499638	0
AL353604.1	0	0	0	0	0	0	0	0	0	0
RNA5SP43	0	0	0	0	0	0	0	0	0	0
RPS29P6	0	0	0	0	0	0	0	0	0	0
LINC01137	1.79577	3.86586	6.60978	3.22695	3.59456	4.35554	9.98754	6.33421	13.711	7.14311
ZC3H12A	132.887	161.4	148.407	180.723	201.493	239.101	211.733	181.615	66.9837	55.7934
MIR6732	0	0	0	0	0	0	0	0	0	0
MEAF6	249.612	260.945	395.486	368.667	350.886	379.607	385.602	403.985	409.171	473.434
MIR5581	4.48943	9.66465	6.05939	11.8439	7.23201	8.76693	8.73957	5.64353	15.1403	21.5717
SNIP1	216.39	215.522	329.97	325.149	294.463	284.695	281.036	298.139	198.264	248.994
FTH1P1	1.79577	0	2.48846	0.348737	2.04178	4.40209	0	1.25866	3.35806	2.2162
AL034379.1	4.48943	0.966465	4.42652	1.41261	13.8035	7.07542	5.23967	4.42576	3.8577	2.68223
DNALI1	173.292	208.756	443.594	521.185	356.797	368.86	355.945	375.845	342.59	422.166
GNL2	1494.08	1577.27	1040.97	869.683	934.982	998.897	1032.14	882.158	1135.55	970.795
AL513220.1	0	0	0	0	0	0	0	0	0	0.87509
RSPO1	0.897886	4.83232	123.517	26.0761	7.06047	15.3468	2.90641	5.07554	7.42779	1.36959
C1orf109	688.678	629.169	548.33	500.155	467.406	482.728	344.977	387.382	376.008	286.403
CDCA8	887.111	839.858	746.519	641.85	1219.21	1153.73	483.132	655.077	116.837	160.027
EPHA10	13.4683	19.3293	7.01671	4.67489	2.53079	1.64496	4.11371	3.69419	2.35585	12.2409
Y_RNA.16	0	0	0	0	0	0	0	0	0	0.87509
ACTN4P2	0	0	0	0	0.531889	0	0	0	0.357303	0
AL929472.1	0	0	0	0	0	0	0	0	0.357303	0
MANEAL	106.848	129.506	138.61	146.356	49.2172	38.2925	21.5522	27.8132	20.3545	30.2268
AL929472.3	0	0	0	0	0	0	0	0	0	0
YRDC	279.242	246.448	238.057	238.331	267.619	278.834	259.094	201.1	167.693	130.779
C1orf122	117.623	130.473	283.151	229.762	209.643	230.288	427.032	338.898	198.035	276.37
MTF1	349.278	385.619	474.741	463.785	434.385	422.76	350.315	329.978	274.39	347.475
AL929472.4	0	0	1.48941	0.348737	0.531889	0.542115	0	0.608882	1.21424	0
AL929472.2	0	0	0	0	0	0	0	0	0	0
INPP5B	990.368	971.297	436.371	554.13	408.434	438.835	382.655	401.386	282.962	275.104
SNORA63	0	1.93293	0	0	0	0	0	0	1.07191	0.466024
RNU6.584P	1.79577	0	0.795574	1.06388	0	0	0.573148	0	0.85694	2.27316
Metazoa_SRP.5	0	0.966465	0	0.732802	0.531889	0	0	0	0.499638	0
SF3A3	2089.38	2403.6	1894.03	1874.3	1805.75	1841.29	1563.83	1681.25	1118.07	1020.09
RNU6.510P	0.897886	0	3.52922	3.55803	3.14845	0	4.7072	2.51732	2.21352	2.24468
FHL3	852.991	812.797	696.359	630.828	746.916	835.988	544.959	607.288	383.445	306.349
UTP11	354.665	335.363	330.087	278.206	278.043	266.582	319.884	315.024	240.981	240.007
POU3F1	117.623	118.875	26.0088	39.8403	8.69902	7.63616	0.573148	11.3689	1.71388	0
AL139158.2	7.18308	20.2958	2.73364	5.72111	2.4879	4.9442	1.78045	6.86129	3.35513	0
AL139158.1	1.79577	0	0.34692	0	0	0	0	0	0	0
MIR3659	0	0.966465	0.34692	0.348737	0	1.08423	0	0	0	0
AL139158.3	0.897886	0.966465	0	0	0	0	0	0.649779	0	0
LINC01343	3.59154	0	0	3.50504	0	0.551424	0	0.608882	0	0
AL513479.1	0	1.93293	0.795574	1.77901	0	1.65427	0	0.608882	0	0
RNU6.753P	0	0	0	0	0.531889	0	0	0	0	0
LINC01685	0	0	0.795574	0.366401	0	0	0	0	0.499638	0
AL354702.1	6.2852	7.73172	21.1153	18.5759	15.8453	18.0387	22.288	24.4826	4.642	6.2965
AL354702.2	0	0	0	0	0	0	0	0	0	0
RRAGC	157.13	138.204	181.114	176.131	242.921	202.361	261.041	259.889	224.835	257.346
AL139260.2	0	0	0	0	0	0	0	0	0	0
AL139260.1	0	2.89939	5.61074	8.28591	2.44501	4.36485	8.6989	3.77598	8.35737	10.7004
MYCBP	503.714	572.147	433.655	385.301	453.585	431.313	550.979	502.329	366.251	411.315
AL139260.3	0	0.966465	0.34692	1.06388	0.489003	1.10285	0	0	2.14382	4.05182
GJA9	0	0	1.48941	0	0.489003	0.551424	1.16663	0.649779	1.92885	1.83562
RHBDL2	13.4683	7.73172	3.7744	10.6564	5.59346	6.01912	3.52023	3.04441	9.28694	11.8603
RNU6.605P	0	0	0	0	0	0	0	0	0	0
Y_RNA.17	0	0	0	0	0	0	0	0	0	0
EIF1P2	0	0	0	0	0	0	0	0	0	0
AKIRIN1	5399.88	5466.32	2542.57	2861.38	3015.94	2920.84	3550.39	3287	3419.1	4005.65
NDUFS5	413.027	475.501	1081.99	819.028	792.726	854.036	1565.03	1461.37	879.12	1136.34
MACF1	14973.1	13756.7	6402.16	8605.52	15037.5	15428.3	19909.7	17503.1	16000.8	21656.1
RNU6.608P	0	0	0	0.366401	0	0	2.31293	0.649779	0.357303	0.437545
RNA5SP44	0	0	0	1.39495	0.531889	0.551424	0	1.82665	1.99855	1.36959
AL356055.1	0	0	0.34692	1.08154	1.55278	2.17777	4.66653	1.90844	2.28615	3.17673
AL442071.1	0	0	0	0.348737	1.02089	0.542115	2.37394	0.649779	3.9274	1.36959
HSPE1P8	0	0	0	0	1.02089	1.10285	1.16663	0	2.57082	1.36959
BMP8A	6.2852	1.93293	4.97691	6.8733	13.4002	24.002	20.918	8.20175	3.71243	6.81948
OXCT2P1	6.2852	15.4634	2.48846	4.65723	1.9989	5.50493	3.47956	2.43553	1.49891	0.903568
AL365277.1	2.69366	6.76525	9.69034	13.2212	13.7177	18.0108	15.1865	13.1137	19.9943	33.8411
PPIEL	0	0	1.34596	3.24462	3.50879	2.19639	1.71944	0.649779	8.13947	8.39879
PABPC4	3211.74	3258.92	2584.87	2725.85	2856.21	2885.94	1784.55	1978.61	2764.29	3081.78
AL365277.2	4.48943	6.76525	14.6255	16.0994	8.65614	10.954	4.09338	3.08531	11.8548	7.17159
SNORA55	3.59154	2.89939	2.97883	7.58844	10.2518	5.44908	4.66653	3.12621	3.35806	4.46088
HEYL	173.292	109.211	123.215	99.9826	134.054	124.729	22.105	128.302	66.6322	14.7807
AL035404.2	0	0	0.795574	0.697475	0	0.542115	0	0	0.357303	0
NT5C1A	0	0	0	0	0	0	0	0	4.35733	4.05182
HPCAL4	17.0598	20.2958	4.81517	2.51182	1.95601	2.7385	2.3536	2.59912	154.4	4.16573
PPIE	395.968	437.809	517.939	513.032	404.136	440.743	390.7	433.134	371.52	351.68
AL035404.1	0	0	0	0	0	0	0	0	0	0
RNU7.121P	0	0	0	0	0	0	0	0	0	0
BMP8B	32.3239	28.0275	37.7389	42.0519	43.4951	35.0119	48.9172	26.4319	21.9261	10.4622
OXCT2	15.2641	21.2622	1.93807	2.47649	4.16934	3.29924	4.68686	5.64353	1.21424	0
AL033527.3	0	0.966465	1.24423	1.44794	0.489003	0	0	0	0	0
AL033527.1	0	0	0	0	0	0	0	0	0.357303	0
AL033527.5	0	2.89939	0.34692	0	0.531889	0.542115	0.593484	0.608882	0.357303	0.466024
AL033527.4	0	0	0	0	0	0	0	0	0	0
TRIT1	462.411	432.01	373.163	339.77	353.863	337.904	314.377	320.754	329.388	295.534
Y_RNA.18	4.48943	0	0	0.697475	0	0.551424	0.573148	0.608882	1.71388	0.466024
MYCL	595.298	517.059	383.088	269.978	650.308	673.227	279.15	422.71	91.5649	52.4924
AL033527.2	0.897886	2.89939	0.795574	0	0	1.09354	1.18697	0.649779	0	0
Y_RNA.19	0	0	0	0	0	0	0	0	0	0
MFSD2A	272.059	187.494	86.8742	112.678	69.8239	53.032	10.459	25.9048	19.849	11.7464
AL663070.1	16.1619	11.5976	7.81229	4.93531	3.46591	3.82273	2.33326	3.12621	1.71388	0.932047
CAP1	2966.61	3042.43	1814.31	1560.65	1886.81	2008.85	2670.05	2526.1	767.34	762.889
PPT1	3379.64	3394.22	2486.38	2274.56	1866.45	1987.84	1268.04	1513.35	704.714	694.197
AL512599.1	0	0	0	0	0	0	0	0	0	0
RLF	1124.15	1215.81	1074.91	1003.11	1293.88	1136.21	1241.44	1181.84	1899.26	1749.73
RNU6.1237P	0	0	1.48941	0.715138	3.01979	2.71988	1.76012	0	3.35806	2.24468
TMCO2	0	0	0	0	0.531889	0	0	0	0.357303	0
AL050341.2	29.6302	74.4178	78.7435	72.9618	64.1875	67.1922	76.3229	77.469	151.844	152.618
ZMPSTE24	876.336	818.596	501.681	478.705	503.463	476.848	713.45	557.819	270.18	344.658
AL050341.1	0	0	0.897307	0	0.489003	2.19639	1.71944	1.21776	2.28615	1.31263
COL9A2	82.6055	89.8812	2835.85	1153.96	1231.87	1374.35	81.1317	201.14	15.1403	6.41042
AL031985.2	0	0.966465	0	0	0.531889	0.551424	0.573148	1.21776	0.499638	0
SMAP2	170.598	123.707	227.143	198.318	281.432	282.48	458.551	363.144	337.734	392.902
AL031985.1	0	0	0	0	0	0	0	0	0	0
AL031985.4	0	0	0.795574	0	0	0	0	0.608882	0	0
ZFP69B	405.844	308.302	129.897	135.174	109.621	90.203	70.7744	89.6467	48.9938	43.2185
AL031985.3	288.221	256.113	129	111.094	109.467	131.094	64.3274	80.9178	54.7136	41.1836
AL603839.4	10.7746	5.79879	6.54977	4.34382	10.7837	5.43046	1.18697	7.63376	4.00003	1.34111
ZFP69	160.722	135.305	139.356	130.588	137.391	133.375	83.9568	99.5979	117.628	82.406
AL603839.3	4.48943	5.79879	3.28403	6.06984	6.74301	5.4677	2.90641	4.91196	13.1388	4.98387
EXO5	148.151	101.479	170.952	189.816	159.233	147.197	114.167	94.9267	99.4227	97.2902
AL603839.1	0	0	0	0	0	0	0.593484	0.649779	0	0
AL603839.2	8.97886	5.79879	11.7301	6.83797	8.16713	10.9075	8.78024	5.72532	4.5723	8.56966
ZNF684	100.563	75.3842	55.4501	53.9311	58.5768	41.5173	68.2784	61.0246	107.841	92.573
AL356379.1	0	0	0	0	0	0	0	0	2.57082	0
GTF2F2P2	0	0	0	0	0	0	0	0	0.714605	0
RIMS3	2119.01	1663.29	827.74	560.493	620.102	766.029	767.871	845.852	1884.78	1723.37
AL031289.1	3.59154	0.966465	2.0398	2.80756	1.59567	0	2.90641	1.86754	5.49894	3.14825
NFYC.AS1	28.7323	31.8933	53.979	51.98	29.563	36.0775	25.7066	17.744	78.4174	64.8472
NFYC	1792.18	1387.84	813.321	882.692	957.974	811.069	1169.45	1013.1	1764.27	2198.81
MIR30E	0	0	0.34692	1.04621	0.531889	1.62634	0	0	1.21424	1.77866
MIR30C1	0	0	0	0.697475	0	0	0	0	0	0
KCNQ4	125.704	131.439	64.058	102.693	82.289	87.5018	50.779	66.5909	47.062	16.6733
RN7SL326P	0	0	0	0.366401	0	0	0	0	1.21424	0
CITED4	64.6478	75.3842	150.202	108.608	169.039	134.215	386.688	262.856	590.429	581.204
AC119677.1	0	0	0	0	0	0	0	0	0	0
AL391730.1	0	0	0	0.348737	0	0	0	0	0.999275	0
UBE2V1P8	0	0	0	0	0	0	0	0	0	0
CTPS1	1425.84	1270.9	1286.91	1319.75	1259.11	1199.99	856.409	796.774	376.45	326.447
SLFNL1.AS1	52.9753	50.2562	60.3905	74.551	73.5471	74.4538	52.9495	42.7945	60.3519	67.7676
SLFNL1	33.2218	30.9269	49.8577	44.0075	51.851	61.2568	29.7796	34.4292	45.2087	28.8003
SCMH1	394.172	313.135	703.225	500.111	1438.14	1295.17	1696.45	1407.09	1365.85	1719.18
RPL23AP17	0	0	1.59115	1.08154	5.19023	2.72919	3.52023	4.38487	3.78506	1.36959
AC093151.3	0	0	0	0	1.46701	0	3.54057	1.21776	6.21355	6.67709
AC093151.1	0	0	0	0	0	0	0	0	0.357303	0
FOXO6	36.8133	31.8933	14.9124	49.1502	35.4739	36.124	42.1411	78.0779	144.965	152.39
AC093151.2	0	0	0.795574	0.348737	0	0	0	1.29956	3.14309	6.02983
RNA5SP45	0	0	0	0	0	0	0	0	0	0
EDN2	0	0	1.69288	2.12775	4.9758	4.38347	9.37372	5.80712	13.8563	9.06416
HIVEP3	15.2641	9.66465	22.0909	57.851	41.1102	65.5565	76.957	110.394	105.767	144.856
AL445933.2	0	0	0	0	0	0	0.573148	0.649779	0.357303	0
AL445933.1	0	0.966465	0.448654	2.11009	0.489003	4.35554	8.08508	5.11644	6.85552	4.92691
HNRNPFP1	0	0	0	0	0	0	0	0	0	0
AC114492.1	0	0	0	0	0	0	0	0	0	0
GUCA2B	0	0	0	0	0	1.63565	4.13405	0	0	0
GUCA2A	0	0	0	0.366401	1.59567	1.63565	4.66653	1.25866	0	0
FOXJ3	2396.46	2028.61	2061.48	2502.44	2778.08	2957.49	2161.47	2734.44	2856.25	2980.36
AC096540.1	0	0	2.97883	5.68578	1.46701	1.08423	1.16663	4.99375	2.78579	5.42141
RIMKLA	454.33	552.818	68.696	133.982	51.2763	56.3685	319.921	173.041	1077.91	926.207
AL513331.1	0	0	0	0.697475	0	0	1.1463	0	0.357303	0.437545
ZMYND12	26.9366	21.2622	8.40439	15.6447	8.08136	6.02843	5.21934	8.93332	26.998	28.3627
PPCS	211.003	256.113	306.353	276.749	219.449	221.409	342.868	350.558	429.017	463.352
CCDC30	13.4683	19.3293	41.5733	66.2076	35.817	47.5829	46.6449	79.2139	104.843	66.512
AL445669.1	0	0	0	0	0	0	0	0	0.85694	0.437545
TMSB4XP1	0	1.93293	0	0.715138	0	0	0	0.649779	0	1.34111
RNU6.536P	0	0	0.448654	0	0	0	0.593484	0	0	0
AL445669.2	0	0.966465	1.14249	1.39495	0	1.10285	0	0	0.714605	0.903568
PPIH	279.242	265.778	365.369	337.806	318.261	329.558	251.562	263.224	167.257	155.965
AC098484.2	0.897886	0.966465	2.63191	2.54714	1.46701	1.09354	2.31293	1.25866	1.07191	2.68223
YBX1	13382.1	13320.8	9429.4	8575.45	7476.69	7741.4	10303.2	8818.65	9001.01	9226.64
CLDN19	519.876	601.141	575.237	614.295	385.949	381.289	176.324	166.63	52.985	27.4592
P3H1	947.269	930.705	1319.14	892.064	1146.68	1594.7	1501.76	1412.35	773.73	497.845
C1orf50	17.9577	20.2958	15.5045	16.4658	19.8859	22.4315	33.873	27.6497	27.2101	43.5422
AC098484.3	0	0	1.7346	0.715138	0	1.10285	0	0	0.499638	0.87509
AC098484.1	38.6091	32.8598	26.9478	29.0779	37.3441	38.3204	51.3318	38.2051	47.9248	69.5929
TMEM269	19.7535	24.1616	19.2189	22.5887	30.0949	27.2919	27.304	26.391	24.9298	16.4066
SVBP	135.581	119.842	189.453	129.873	113.791	111.494	137.602	150.958	101.197	147.73
ERMAP	105.053	99.5459	157.085	83.7903	92.2835	96.755	114.066	109.667	228.908	298.473
AL512353.1	17.9577	15.4634	9.69034	9.62787	6.12535	5.47701	9.37372	6.90219	17.4961	15.5031
ZNF691	410.334	419.446	257.99	243.58	176.7	172.64	155.674	135.731	189.474	221.128
AL512353.2	4.48943	5.79879	5.91594	3.61102	3.01979	2.19639	0	0	1.42921	0
AL512353.3	0	0	0.34692	0.366401	0	1.08423	1.1463	0	0.714605	1.36959
ATP6V1E1P1	0	0	1.79461	1.08154	1.50989	0.551424	2.33326	0	1.35658	0.466024
SLC2A1	3455.96	3259.89	2076.41	2059.73	1811.35	1183.67	4228.59	1816.52	5360.78	2853.31
AC099795.2	1.79577	14.497	1.14249	2.44116	4.04068	2.18708	4.64619	1.90844	5.21427	5.39293
SLC2A1.AS1	49.3837	47.3568	30.5422	40.6968	20.9926	28.46	33.2592	13.2773	155.833	100.943
AC099795.1	6.2852	9.66465	4.46824	7.58844	2.08467	1.09354	5.83316	2.47643	27.4947	26.2889
RNU6.880P	1.79577	0	0.34692	0.366401	1.02089	0	0	0	1.71388	1.83562
U6.1	0	0	0	0	0	0	0	0	0	0
AL161637.1	0	0	0	0.697475	0	0	0	0	0	0
FAM183A	13.4683	19.3293	31.0742	30.4729	29.7774	31.1798	14.0199	27.6497	20.7845	34.421
EBNA1BP2	663.537	586.644	375.007	386.404	295.287	326.566	601.551	493.677	188.042	191.158
MIR6733	0	0	0	0	0	0	0	0	0	0
CFAP57	15.2641	13.5305	29.2328	44.4224	23.2488	35.4795	16.2718	21.9652	9.85628	10.8998
RNA5SP46	0	0	0.34692	0.366401	0.531889	1.09354	0	0.649779	0	0.437545
TMEM125	454.33	540.254	181.634	250.576	272.69	366.952	276.963	326.08	64.3402	24.8624
C1orf210	290.915	230.985	44.8939	78.5062	55.4885	80.0052	90.7939	85.0619	8.99934	0.466024
TIE1	70.0351	62.8202	22.2161	21.4541	41.5992	60.1633	77.201	27.0408	37.993	15.7412
MPL	9.87674	8.69818	7.75227	9.17315	7.2749	5.44908	8.78024	1.21776	8.06977	8.59814
AL139289.2	15.2641	16.4299	5.61074	5.99919	5.4648	5.48632	1.1463	3.1671	4.92667	5.94439
CDC20	3064.48	3502.47	2195.99	1885.01	3316.02	2794.22	1222.69	1631.59	300.446	365.575
ELOVL1	356.461	358.558	333.768	286.784	395.548	509.654	922.867	724.98	312.237	291.692
MIR6734	0	0	0	0	0	0	0	0	0	0
MED8	211.901	234.851	154.166	143.323	190.332	218.147	332.612	292.01	305.887	363.662
AL139289.1	7.18308	8.69818	3.4875	4.6219	2.04178	7.6827	8.14608	12.5866	6.42852	2.71071
SZT2	719.206	605.007	1234.77	1406.74	1122.58	1211.34	1275.12	1039.12	1381.82	1540.7
SZT2.AS1	0.897886	0	0.693841	0.697475	0	0	0	0	0	0.466024
MIR6735	0	0	0	0	0	0	0	0	0	0
HYI	0	0	0	0	0	0	0	0	0	0
HYI.AS1	0	2.89939	0.448654	0.348737	0.489003	2.17777	1.1463	0.608882	1.71388	1.36959
PTPRF	16101.8	15688.6	14052.5	14910.2	14903.5	16600.6	12508.7	15257	3921.33	2875.29
KDM4A	5230.18	4589.74	1478.4	1509.17	1381.33	1390.7	1202.09	1492.12	1120.03	1190.28
KDM4A.AS1	14.3662	17.3964	22.0543	30.9584	17.2265	20.7866	13.4264	14.5769	20.0699	16.1218
ST3GAL3	70.0351	98.5794	201.079	176.317	183.546	177.042	270.045	228.872	457.705	502.555
AL451062.1	0.897886	0	1.59115	0.348737	0	0	0.573148	1.29956	1.57155	2.76766
U6.2	0	0.966465	0.693841	0.348737	0.489003	1.62634	0	0	3.14309	0
AL451062.2	0	0	1.14249	0.732802	1.02089	1.64496	1.73978	1.25866	5.85625	4.10878
MIR6079	0	0	0.448654	0.348737	0	0	0	0	0	0.437545
SHMT1P1	5.38731	1.93293	6.05939	6.45391	1.50989	9.28112	4.05271	2.59912	9.28401	7.60913
ARTN	127.5	126.607	18.9503	45.4378	22.5883	13.6739	22.7391	41.8175	9.64131	56.0782
AL357079.1	3.59154	6.76525	0.795574	0.348737	1.9989	1.09354	0.573148	0.649779	3.07046	2.71071
IPO13	1099.91	931.672	691.163	669.713	736.235	757.786	1104.78	913.825	788.789	1011.13
DPH2	1343.24	1188.75	665.895	790.761	459.453	494.233	495.9	420.393	491.634	428.75
ATP6V0B	417.517	410.747	701.813	670.402	617.502	506.683	946.878	765.871	587.714	893.422
B4GALT2	882.622	978.062	1518.35	1359.01	1123.51	1303.29	1029.48	952.352	609.253	715.476
CCDC24	198.433	267.711	196.071	244.855	142.942	153.984	167.3	192.003	95.2715	93.8857
SLC6A9	1541.67	902.678	299.871	297.365	220.127	198.557	301.235	308.372	172.326	101.865
AL139220.2	17.0598	4.83232	4.9169	2.51182	11.7188	8.74831	12.2191	12.1004	19.425	8.07516
AL139220.1	0	0	0	0	0.489003	0	0.573148	0	0.499638	0
KRT8P47	0	0	0	0	0	0	0	0	0	0
RN7SL479P	0	0	0	0	0.531889	0	0	0	0	0
KLF17	4.48943	0.966465	0	0	0.489003	0	0	0	0.357303	0
AL356653.1	0	2.89939	2.83538	2.11009	2.04178	0.542115	0.593484	2.47643	0	0
KLF18	18.8556	8.69818	0	0	0	0	0	0	0.714605	0
AL359839.1	0	0	0	0	0	0	0	0	0	0
Y_RNA.20	0	0	0	0	0	0	0	0	0	0
OOSP1P1	0	0	0	0	0	0	0	0	0	0
AL035417.1	0	0	0	0	0	0	0	0	0	0
AL035417.2	0.897886	0	1.34596	1.44794	0.978006	1.09354	1.71944	0	1.71388	0.466024
DMAP1	756.02	648.498	708.048	793.556	843.368	717.669	763.668	654.908	546.638	640.488
ERI3	984.083	954.867	933.508	934.69	923.89	955.884	864.023	783.923	764.577	769.442
ERI3.IT1	14.3662	4.83232	16.1384	20.686	9.05937	9.32767	12.7923	10.76	32.8543	29.6469
RNU6.369P	0	0	0	0	0	0	0	0	0	0
RNF220	2003.18	1903.94	1533.15	1584.76	1161.85	1211.3	893.27	922.113	532.921	581.432
MIR5584	0	0	0	0.348737	0	0	0	0	0.499638	0
TMEM53	210.105	164.299	192.396	185.3	107.854	93.5488	161.975	143.001	154.197	131.131
C1orf228	10.7746	10.6311	43.9783	74.3037	27.4354	25.198	21.5115	30.167	25.7111	28.1245
RNU5F.1	0	0	0	1.77901	0.531889	0	0	0.649779	1.07191	0.903568
RNU5D.1	0	0	0.448654	0.697475	0	0	0.593484	0	0	0
KIF2C	1666.48	1921.33	1341.7	1093.94	1815.97	1801.71	733.201	1046.68	257.387	320.208
AL592166.1	8.97886	3.86586	3.1823	10.7977	7.10335	7.08473	6.44698	3.1671	0	3.69971
RPS8	13115.4	15285.6	16409	13633.8	10261.1	9653.76	7457.96	8438.8	9032.54	6070.01
SNORD55	0	0	0	0	0	0	0	0	0	0
SNORD46	3.59154	2.89939	3.38576	6.52456	2.04178	4.35554	8.7599	6.33421	1.92885	1.80714
SNORD38A	0.897886	0.966465	1.59115	3.59336	1.9989	4.36485	1.73978	1.25866	2.07118	1.83562
SNORD38B	0	0	0	0	0	0	0	0	0	0
SNORD38B.1	0	0	0	0	0	0	0	0	0	0
RPS15AP11	0	0.966465	1.14249	2.12775	3.68033	2.18708	1.18697	1.29956	1.35658	0.87509
BEST4	14.3662	19.3293	10.7911	16.7086	9.2738	13.646	7.61361	9.5422	4.642	1.36959
PLK3	227.165	177.83	105.793	132.376	161.678	246.542	263.476	275.033	102.839	64.3631
TCTEX1D4	0	3.86586	1.93807	1.43028	1.59567	1.64496	4.09338	8.85153	2.42849	1.80714
BTBD19	21.5493	7.73172	37.7389	38.7719	38.1762	39.3395	49.1002	50.2647	49.7752	22.5892
PTCH2	22.4471	39.6251	80.7182	130.844	73.0581	56.892	34.4055	39.0185	31.1375	36.4379
RNU5E.6P	0	0	0	0	0	0	0	0	0	0
AL136380.1	0	0	0.34692	0.715138	1.59567	0.542115	1.18697	1.94934	0.357303	0
EIF2B3	360.95	382.72	334.292	262.946	309.991	296.835	444.897	330.578	339.941	326.152
RNA5SP47	0	0	0	0.348737	1.06378	1.08423	0	0	0.357303	0
CCNB1IP1P1	0	0	1.38768	0.366401	0.531889	0	0	0	0.714605	0
PPIAP35	1.79577	0	0.795574	1.77901	0	0.551424	0.593484	0	1.35658	0.437545
MRPS17P1	0.897886	0.966465	0.693841	1.08154	3.06267	1.10285	1.73978	0	3.8577	0.903568
HECTD3	1584.77	1520.25	1299.29	1285	1020.13	1163.92	1269.54	1029.17	688.161	604.337
UROD	1095.42	1008.99	1041.1	786.109	755.125	749.335	1014.62	886.007	671.226	1006.38
ZSWIM5	83.5034	69.5855	301.113	183.984	179.214	131.776	317.466	234.756	289.89	415.709
OSTCP5	0	0	1.04076	0.715138	1.50989	0	0	0.649779	0.999275	2.27316
LINC01144	12.5704	7.73172	9.85209	7.09839	6.12535	6.03774	6.50799	6.90219	13.9957	9.03568
HPDL	219.084	221.32	188.895	207.5	47.8104	53.4996	37.3525	38.3278	27.3524	16.7018
MUTYH	1292.96	1320.19	704.354	728.875	455.644	434.903	268.451	247.184	165.907	154.767
TOE1	404.049	244.516	247.225	269.964	167.829	184.275	139.545	123.313	81.7754	108.439
TESK2	422.006	435.876	296.141	309.849	331.704	307.901	237.704	258.594	147.478	142.013
PPIAP36	0	0	2.38672	1.43028	0	1.64496	0.573148	0.649779	0.499638	0
CCDC163	73.6266	57.9879	82.8649	71.1959	63.5698	67.2573	55.8763	58.0211	35.3495	37.9784
MMACHC	136.479	127.573	147.108	148.899	175.765	163.984	154.63	156.842	251.191	230.62
PRDX1	1668.27	2317.58	2156.63	1694.25	1690.77	1557.69	2437.95	2388.15	943.739	762.537
HMGB1P48	0	0	0.34692	0	0	0	0	0	0	0
AKR1A1	1788.59	2307.92	1962.47	1740.05	1688.07	1800.62	1316.58	1445.91	1408.84	1044.01
AL355480.3	0	0.966465	0	0.366401	0.489003	0	0	0	1.35658	0.932047
AL355480.1	0	0	1.59115	1.06388	3.01979	0	0.593484	0	2.35585	0.437545
NASP	6671.29	7444.68	7066.2	6834.62	5324.28	5181.01	3006.31	3564.51	1827.4	2304.71
AL355480.2	0	0	0	0	0	1.65427	0	0	0	0.87509
AL355480.4	0.897886	0	0.897307	1.06388	0.489003	0	0	0	0	0
CCDC17	18.8556	32.8598	11.7301	21.8559	29.2455	24.5534	47.8116	27.1226	24.9268	28.9815
GPBP1L1	2119.01	2291.49	1544.62	1412.73	1720.03	1581.7	1555.61	1596.06	1797.29	1813.16
RPS15AP10	6.2852	15.4634	10.7911	10.449	7.7639	5.98188	4.66653	5.60263	23.213	13.9911
AL604028.2	14.3662	16.4299	19.5058	19.066	11.6759	10.9447	19.2596	9.46041	26.7801	21.0487
TMEM69	650.069	688.123	448.956	432.376	464.145	471.288	522.509	571.919	580.637	559.433
IPP	119.419	160.433	238.101	233.704	277.125	294.227	279.646	321.572	455.373	418.611
AL604028.1	2.69366	2.89939	6.6515	13.2389	7.50659	13.6553	8.73957	20.952	12.8541	17.1678
AL603882.1	0	0.966465	0	0	0	0	0	0	0	0.437545
MAST2	2057.06	1915.53	2015.64	1933.14	2526.95	2456.05	2430.93	1921.35	3188.79	2553.45
TMA16P2	0	0	0.34692	0.697475	0.489003	0	0	0	0	0
PIK3R3	267.57	231.952	252.856	273.191	239.052	236.747	254.838	418.448	360.601	430.355
AL358075.4	0	0	0	0	0	0	0	0	0	0
AL358075.1	0	0	0	0.348737	2.53079	0	1.1463	0	2.35585	0
AL358075.3	0	0	0	0	0.489003	0	0.593484	0	0	0
AL358075.2	0	0	0.448654	0.697475	0	0	0.573148	0	1.85622	0
TSPAN1	1.79577	0.966465	11.1798	9.27913	11.7617	9.29974	7.61361	12.5048	12.9267	8.5127
AL672043.1	0	0	0	0	0.489003	0	0	0	0	0
POMGNT1	1118.77	1160.72	1730.02	1649.43	1555.35	1512.78	1754.96	1559.02	2386.53	2304.41
LURAP1	65.5457	39.6251	38.7614	44.2548	25.9684	37.7225	50.4536	33.4568	344.232	135.546
RAD54L	489.348	558.617	589.171	580.445	438.409	443.94	223.868	199.032	75.7101	79.5529
LRRC41	2060.65	2200.64	2936.96	2328.25	2611.03	2647.63	2931.28	2535.22	3585.23	3151.51
UQCRH	568.362	734.513	1135.46	869.144	879.777	762.122	1635.78	1264.66	1481.61	1375.02
NSUN4	648.273	600.175	431.49	429.101	387.664	474.186	448.072	379.539	569.148	575.384
AL122001.1	0	0	1.04076	2.47649	0.489003	3.81342	2.33326	0	1.35658	1.31263
FAAH	254.102	184.595	254.813	263.771	262.447	247.177	171.047	105.687	144.544	97.4715
FAAHP1	0.897886	12.564	9.40343	16.2054	7.06047	5.49562	3.52023	3.2489	5.14164	3.26217
LINC01398	0.897886	1.93293	6.87326	5.46069	0.531889	2.19639	1.18697	1.29956	0	0
DMBX1	0.897886	1.93293	333.247	572.735	114.932	113.121	19.8531	176.494	0.357303	0.437545
AL136373.1	0	0	0	0.348737	0	0.551424	0	0	0	0
MKNK1.AS1	8.08097	6.76525	7.794	12.5767	2.53079	6.55193	2.33326	4.38487	9.42634	4.10878
KNCN	0	0	0	1.43028	0	0	0	0	0	0.437545
MKNK1	403.151	331.497	236.596	278.1	207.095	231.961	362.127	352.911	284.098	367.649
MOB3C	131.091	102.445	71.0747	110.392	50.2381	65.1168	65.8842	93.1364	173.683	186.021
ATPAF1	1315.4	1322.12	1042.88	1186.25	1555.45	1343.84	1414.23	1336.21	1660.43	2269.08
NENFP1	2.69366	0	0.448654	1.77901	4.12645	2.72919	0	1.86754	2.71316	0.87509
TEX38	1.79577	2.89939	5.01863	5.66812	4.52968	7.6827	7.02013	3.1671	4.78727	9.47323
EFCAB14.AS1	8.97886	8.69818	7.71055	17.8961	12.5253	7.65478	7.57294	5.64353	8.1424	12.3263
EFCAB14	1600.93	1630.43	1242.58	1683.08	1415.2	1421.49	1725.11	1747.11	2162.32	2199.8
AL593856.1	0	0	0	0.348737	0.489003	0.551424	0	0	0	0
CYP4B1	4.48943	4.83232	3.93615	4.30849	15.442	6.58916	3.49989	11.9777	0.499638	0.437545
CYP4Z2P	0	0	0	0.366401	0.531889	1.09354	0	0	1.21424	0
AL731892.1	0	0	0.795574	0.366401	2.04178	0.551424	0.573148	0	0	0
CYP4A11	0	0	0.897307	0	6.08246	1.09354	0	0	0	0
CYP4A26P	0	0	0	0	0	0	0	0	0	0
CYP4A43P	0	0	0	0	0	0	0	0	0	0
CYP4A27P	0	0	0	0	0	0	0	0	0	0
CYP4A44P	0	0	0	0	0	0	0	0	0	0
CYP4X1	28.7323	28.0275	32.1282	16.4305	155.725	86.3896	87.8875	18.7572	1.21424	2.33012
CYP4Z1	1.79577	0	2.28499	2.91354	2.57367	2.17777	0.573148	1.94934	1.21424	0.466024
AL450996.1	0	1.93293	0	0	0	1.64496	0	0	0	0
CYP4A22.AS1	14.3662	20.2958	16.2584	21.6969	8.16713	9.82324	4.72753	3.1671	0.999275	0.437545
CYP4A22	3.59154	0.966465	1.83634	2.51182	0.978006	2.19639	0	0.649779	0.714605	0.437545
MTND1P34	0	1.93293	0	0.366401	0	0	1.18697	0.608882	0.499638	0
LINC00853	3.59154	2.89939	2.28499	1.0992	1.06378	1.08423	0	1.94934	0.499638	0.437545
PDZK1IP1	0	0	0	0	1.50989	0.542115	0	0	0.499638	0
TAL1	1.79577	0	8.66787	1.4656	56.7667	52.9761	37.1085	9.5422	4.71464	2.24468
AL135960.1	0	0	0	0	0.531889	1.09354	1.73978	0.608882	0	0.437545
STIL	1403.4	1339.52	812.027	764.474	1227.74	1079.4	521.874	572.646	131.838	146.407
CMPK1	321.443	373.055	482.999	421.318	696.368	731.866	1081.63	1105.75	1029.41	919.939
LINC01389	0	0	1.48941	1.06388	4.12645	4.9442	7.65428	3.77598	3.28543	3.17673
FOXE3	0	0	0.448654	0	1.59567	1.10285	1.76012	3.12621	0.499638	0.466024
FOXD2.AS1	5.38731	0	40.0473	24.3854	16.6345	14.7488	5.30068	8.20175	3.64273	0.466024
FOXD2	0	0.966465	20.0328	8.98339	3.63745	4.92558	1.18697	4.95285	0.357303	0
AL356458.1	0	0	0	0	0	0	0	0	0	0
RPL21P24	0	0	0	0	0	0.542115	0	0	0	0
ATP6V0E1P4	0	0	0	0	0	0	0	0	0	0
LINC01738	0	0	0	1.44794	0.978006	0	0.593484	0.608882	0	0
TRABD2B	127.5	139.171	465.974	663.212	307.469	252.514	168.897	87.2157	105.2	271.814
AL691459.1	0	0	0	0	0	0	0	0	0	0
AC096541.1	0.897886	1.93293	1.34596	3.59336	5.37903	2.16846	2.3536	2.59912	0.357303	0.903568
AL356289.1	0	3.86586	4.32479	7.93718	5.55057	3.81342	0.593484	1.21776	3.21572	7.20007
AL356289.2	0	0	0.795574	0	0	1.10285	0	0	0	0
CYP46A4P	0	0	0.897307	2.91354	1.55278	0	0	0	0.85694	2.27316
SKINT1L	1.79577	2.89939	36.8782	41.9681	12.5682	6.57055	4.09338	11.9368	5.85625	2.65375
AL356289.3	0.897886	0	15.6846	25.851	3.72322	2.18708	1.76012	1.86754	0.85694	1.36959
AL109659.1	1.79577	3.86586	7.95574	12.1927	4.16934	0	0.593484	0	2.50112	3.14825
SLC5A9	18.8556	33.8263	296.382	434.128	160.194	106.045	59.5389	19.4888	18.6407	19.7076
AL109659.2	0	2.89939	22.4978	36.1233	5.63635	15.8982	8.14608	4.34397	3.71243	1.36959
AL109659.3	0	0	0	0.715138	0.531889	0	2.31293	0.608882	0.499638	0
SPATA6	320.545	260.945	885.158	988.595	382.32	423.658	234.635	355.152	171.757	140.33
PPP1R8P1	0	0	1.38768	0.715138	0	1.10285	1.71944	0.608882	1.21424	0
RNU6.723P	0	0	1.69288	0.366401	0	1.10285	0	0	0.85694	0
AL356968.2	21.5493	14.497	6.56806	8.25059	6.21112	6.04705	7.02013	10.6373	14.6435	23.0552
RNU4.61P	0	0	0	0	0	0	0.573148	0	0	0
AL356968.1	0	0	0	0	0	0	0	0	0	0
AGBL4	22.4471	15.4634	28.7607	50.8586	32.7972	41.5079	19.8124	15.9582	5.78655	23.5497
BEND5	87.0949	88.9148	87.3931	83.7726	103.985	70.4076	97.3832	80.677	87.6287	136.905
AC092264.1	0	0	0.897307	0	0.489003	1.08423	0	0	0.357303	0.932047
AL590432.1	0	0	0	0	0	0	0	0	0	0
AGBL4.IT1	0	0	0	0	0	0	0	0	0.357303	0
AL390023.1	0	0	0	0	0	0	0	0	0	0
ZNF859P	0	0	0	0	0	0	0	1.25866	0	0
AL645730.1	0	0	0	0	0	0	0	0	0.499638	0.437545
MTND2P29	0	0	0.448654	0	0	0	0	0	0	0
ELAVL4	15.2641	26.0945	29.598	37.3063	43.1091	45.9659	12.2395	11.1644	1.42921	1.83562
AL583843.1	0	0	0	0.348737	0	0.551424	0	0	0.357303	0
AL592182.2	0	0	0	0	0.489003	0	0	0	0	0
AL592182.1	0	0	0	0.348737	0	0	0	0	0	0
AL596275.2	0	0	0	0	0.489003	0	0	0	0	0
AL592182.3	0	0	0	0	0	0	0	0	0	0
AL596275.1	0	0	2.0398	2.18074	0.489003	1.63565	1.71944	1.90844	4.215	1.36959
HMGB1P45	0	0	0	0	0.489003	0	0	0	0	0
FCF1P6	0.897886	0	0	0.366401	1.02089	0	0	0	0.357303	0.437545
DMRTA2	1.79577	0.966465	78.8716	53.1499	2.9769	4.37416	0.573148	0.649779	0	0
AL049637.2	0	0	0	0.366401	0	0	0	0	0	0
FAF1	1042.45	907.51	756.997	739.422	858.141	838.335	868.856	812.714	926.638	878.385
AL049637.1	2.69366	2.89939	5.46729	4.69256	5.14734	6.00981	4.66653	4.42576	12.9267	3.64275
RNU6.1026P	0	0	0	0.732802	0.531889	0	0	0	0.714605	0
PHBP12	6.2852	6.76525	1.04076	2.52948	2.04178	2.71988	1.76012	2.51732	10.995	5.01234
MRPS6P2	0.897886	0	0.795574	0	0.978006	0	0	0.608882	0.714605	0
CDKN2C	0	0	0	0.366401	5.63635	10.9447	2.86574	5.03465	14.4983	29.5226
MIR4421	0	0	0	0	0	0	0	0	0	0
MIR6500	0	0	0	0	0	0	0	0	0.499638	0
C1orf185	0	0	0	0	0	0	0	0	0	0
Y_RNA.21	0	0	0	0	0	0	0	0	0	0
CFL1P2	0	0	0	0.366401	0	0	0	0	0	0
LINC01562	0	0	1.59115	0.348737	1.50989	0	0.593484	0	1.78651	2.27316
RNF11	780.263	903.644	1249.29	1117.61	1497.07	1506.62	2185.02	2028.85	1926.65	2111.83
AL162430.1	12.5704	17.3964	30.417	24.6104	19.3541	24.6093	30.8039	35.0789	13.5687	8.10364
AL162430.2	0	0	0.34692	0.715138	4.57257	0.542115	1.76012	2.51732	1.57155	2.2162
TTC39A	205.616	158.5	87.448	86.3596	134.964	126.281	196.059	153.234	505.642	499.521
TTC39A.AS1	0	0	0	0	1.02089	0	0	0	2.42849	4.54632
EPS15	2528.45	1947.43	898.385	828.312	1470.68	1268.66	2421.83	1894.72	3077.85	3619.23
AL671986.1	4.48943	3.86586	2.14153	1.06388	4.04068	1.63565	8.24777	2.51732	6.85552	11.7749
RNU6.877P	0	0	0.448654	0	1.02089	0	0	0	1.35658	1.36959
AC104170.2	0	0	0	0	0	0	1.1463	0	3.00076	0.87509
AC104170.1	0	0	0	0	0	0	2.29259	1.29956	0.999275	1.34111
RNU6.1281P	0	0	0	0	0	0	0.593484	0	1.85622	0.466024
CALR4P	0.897886	0	0	0.348737	1.02089	2.18708	5.32102	1.29956	23.5035	17.6338
OSBPL9	2292.3	2455.79	2274.22	1776.73	4612.85	3448.4	6835.3	5992.95	6464.08	6572.02
GAPDHP51	0	0	0.34692	0.366401	1.02089	0	1.73978	0	1.35658	0.87509
SLC25A6P3	0	0	0	0.366401	0.489003	0	0	0	0.357303	0.903568
SNORA26	0	0	0	0	0	0	0	0.608882	0.357303	0.903568
NRDC	3833.07	3628.11	2441.39	2034.05	2920.19	2623.25	3160.55	3112.81	3595.38	4006.34
AL050343.1	3.59154	5.79879	8.09919	10.343	17.1407	15.8703	17.5605	15.6719	12.857	20.3445
AL050343.2	0	0	0	1.44794	0.531889	0.551424	1.1463	1.25866	1.21424	0
MIR761	0	0	0	0	0	0	0	0	0	0
TSEN15P2	1.79577	0	1.14249	1.79668	0.978006	1.10285	0	0	1.21424	0.903568
RAB3B	3331.16	3341.07	3521.18	6023.02	3149.27	4433.43	2719.67	2529.39	346.091	330.535
RNA5SP48	0	0	1.59115	3.19163	3.91202	1.65427	0	0	0	0
AL445685.2	0	0	0.795574	0.366401	1.06378	1.10285	0.593484	0	0	0
RN7SL290P	0	0	0	0	0	0	0	0	0	0
TXNDC12	1077.46	1220.64	817.367	673.223	758.3	847.456	903.404	886.457	530.784	571.503
KTI12	130.193	127.573	144.8	128.169	102.432	139.515	111.464	125.253	88.5612	90.4526
AL445685.1	3.59154	0	1.14249	2.12775	3.99779	2.7385	0.573148	1.21776	1.07191	2.73918
TXNDC12.AS1	2.69366	0.966465	0.34692	2.14541	1.02089	3.262	2.37394	0.649779	3.9274	2.76766
BTF3L4	2326.42	2306.95	1259.52	1280.71	1568.78	1605.42	1473.29	1586.31	1815	1799.22
ZFYVE9	1668.27	1435.2	1468.1	1455.19	1457.65	1268.26	865.372	977.857	995.283	1006.49
RN7SL788P	0	0	0	0.348737	0	0	0	0	1.21424	0.437545
AL139156.2	2.69366	1.93293	2.63191	3.87144	4.61545	1.65427	4.64619	6.94309	0	0
AL139156.1	2.69366	0	0.34692	0	2.08467	0.551424	0	0.649779	0.714605	0.466024
PDCL3P6	0	0	0	0.348737	1.02089	0	1.73978	0.649779	0.714605	0
AL139156.3	0	0	0.693841	1.0992	0	0.551424	0	0	0.85694	0
DNAJC19P7	0	0	0.448654	0.366401	1.02089	0	0	0.649779	0.999275	0.466024
ANAPC10P1	0	0	1.34596	0.366401	0	0.551424	0.573148	1.29956	0.714605	0.903568
CC2D1B	342.094	263.845	537.605	561.189	470.7	471.306	513.521	406.461	321.67	389.609
AL513218.1	0	1.93293	2.83538	2.14541	2.53079	2.16846	2.3536	0.608882	1.85622	2.2162
PLA2G12AP1	7.18308	2.89939	3.4875	4.60424	3.01979	2.19639	3.45922	4.30307	5.28398	0.932047
ORC1	1268.71	1329.86	782.636	714.984	496.823	521.179	223.623	261.147	48.2066	57.106
PRPF38A	994.857	944.236	999.54	1003.43	1051.14	1109.61	919.391	944.76	785.893	716.949
ZCCHC11	1536.28	1497.05	1780.39	1769.6	1760.57	1899.67	1591.23	1817.95	1934.62	1912.74
AL591167.1	0	0	0.34692	3.19163	1.02089	1.09354	0	0.608882	2.71316	3.20521
EEF1GP7	0	0.966465	3.28403	1.0992	0	0.542115	0.573148	0	0.357303	0.932047
GPX7	108.644	126.607	156.219	132.274	39.7719	30.6098	26.7105	55.0948	27.7097	13.059
FAM159A	2.69366	3.86586	8.64958	6.10517	5.42192	7.13128	2.90641	13.2773	0.714605	0.87509
COA7	784.752	766.406	481.671	479.098	388.462	392.141	251.358	282.39	355.747	315.565
NDUFS5P3	0	0	0	0	0	0	0	0	0	0
RN7SL62P	0	0	0	0	0	0	0.573148	0.608882	0	0
ZYG11B	1211.25	1162.66	1236.82	1030.45	1474.24	1389.55	1946.71	1663.21	3559.75	3229.64
RNU2.30P	0	0	0	0	0	0.542115	0	0	0.999275	0
RPS13P2	1.79577	1.93293	2.28499	1.41261	2.08467	0	0	1.21776	1.57155	1.36959
RNU6.969P	0	0	0.693841	0.366401	1.02089	0.551424	2.90641	0	0.357303	1.86409
ZYG11A	145.457	144.97	34.7001	27.9081	27.0322	33.9742	11.0932	29.2309	8.5694	5.44989
AC099677.4	2.69366	5.79879	0.693841	1.43028	0.489003	2.17777	0.573148	0.608882	0.499638	0
ECHDC2	384.295	453.272	435.633	509.726	520.861	634.851	235.578	285.916	598.609	214.697
AC099677.1	17.0598	5.79879	9.64862	7.90185	7.72101	10.4212	4.68686	3.12621	11.9275	4.51784
AC099677.2	0	0	0	0	0	0	0	0.649779	2.07118	1.34111
SCP2	261.285	288.006	555.313	410.026	659.127	703.511	893.144	759.323	1705.96	1779.26
MIR1273F	0.897886	0	0	0	0.531889	0	0	0	1.85622	0.437545
MIR5095	0	0	0	0	0	0	0	0	0	0
MIR1273G	0	0	0	0	0	0	0	0	0	0
AC099677.3	0	0	0.693841	0.366401	0	0	0	0	0	0
AL445183.3	0.897886	0.966465	1.48941	0	0.978006	2.18708	0.573148	0.608882	0.714605	0
TUBBP10	0	0	0	0	0	1.08423	0	0	0	0.87509
PODN	11.6725	18.3628	128.969	122.474	249.732	635.179	41.9987	66.5864	210.171	243.241
AL445183.1	0	0	0	0	0	0	0	0	0	0
HIGD1AP11	0	0	0	0	0	0	0	0	0	0
SLC1A7	0	1.93293	19.519	33.02	29.9662	66.2103	2.3536	3.08531	33.136	11.8318
AL445183.2	0	0.966465	3.38576	3.59336	5.10446	13.1504	0	1.25866	4.56937	0.932047
AL606760.4	0	0	0.448654	0	0	0	0	0	0.357303	0.437545
CPT2	520.774	470.668	337.381	328.257	407.91	443.109	662.643	625.309	573.677	604.347
AL606760.2	5.38731	6.76525	2.73364	1.43028	2.4879	1.63565	1.73978	0.649779	1.49891	1.83562
C1orf123	385.193	473.568	641.762	604.777	471.996	478.763	370.375	387.182	401.452	386.168
AL606760.3	1.79577	0.966465	1.14249	1.76135	1.46701	4.38347	3.52023	0.608882	12.1424	7.69457
MAGOH	82.6055	81.183	145.786	109.942	103.342	100.699	119.61	104.669	64.2735	63.1928
AL606760.1	2.69366	0.966465	3.87614	1.77901	2.57367	2.7385	2.94708	1.94934	2.92812	2.27316
LRP8	3091.42	2684.84	1655.63	2259.32	286.124	248.308	324.307	307.477	347.389	236.45
AL355483.4	0	0	0	0	0	0	0	0	0	0
AL355483.2	3.59154	1.93293	2.59019	2.44116	0	0	0	0	1.85622	0.466024
AL355483.1	2.69366	1.93293	1.34596	4.60424	0.489003	0	0.593484	0	0	0
AL355483.3	8.08097	9.66465	4.9169	9.62787	0.489003	0.542115	1.1463	1.25866	1.71388	0.466024
LINC01771	18.8556	6.76525	1.14249	2.16308	0.489003	0.542115	0	0	0	0
AC119428.1	0	0	0	0	0	0	0	0	0	0
AC119428.2	0	0	0.448654	0	0	0	0	0	0	0
SLC25A3P1	8.08097	5.79879	4.87518	2.18074	0.489003	0	0	1.94934	0	0
DMRTB1	3.59154	7.73172	0	0	0	0	0	0	0.357303	0
GLIS1	5.38731	4.83232	109.401	128.358	9.14514	10.9354	4.11371	4.99375	1.35658	2.24468
RNU7.95P	0	0	0	0	0	0	0	0	0	0
NDC1	3506.24	3602.01	1965.59	1863.87	2089.59	1949.24	1378.92	1552.45	959.097	892.821
SNORA58	1.79577	6.76525	2.0398	0.366401	1.46701	0	0	0	0	1.39807
AL049745.1	0	0	0	0	0.489003	0.542115	0	0	0.357303	0
YIPF1	449.841	480.333	397.072	345.999	312.925	307.396	406.028	377.312	341.176	398.217
DIO1	0	2.89939	6.05939	6.89096	4.04068	4.92558	4.09338	3.77598	1.21424	2.71071
HSPB11	79.9118	58.9543	168.917	163.392	120.929	139.861	132.423	139.671	89.8511	89.3678
LRRC42	553.098	562.482	721.757	649.028	568.191	587.091	821.272	667.041	403.805	567.824
HNRNPA3P12	1.79577	0	2.8771	1.44794	1.06378	1.10285	5.32102	3.81688	0.85694	0.437545
LDLRAD1	0	0	0	0	0	0.551424	1.1463	0	1.35658	0
TMEM59	875.438	1007.06	773.48	647.099	930.993	894.264	1528.72	1409.94	1321.12	1856.74
AL353898.3	4.48943	6.76525	4.67171	7.93718	5.55057	4.92558	2.90641	3.77598	11.4975	9.88229
TCEANC2	377.112	415.58	338.223	368.023	376.22	357.615	363.233	425.023	480.294	505.998
MIR4781	0	0	0	0	0	0	0	0	0	0
AL353898.1	0	0	1.24423	0	0.531889	0	0	0	0.357303	1.36959
AL353898.2	0	0	0	0	0	0	0	0	0	0
AL357673.1	1.79577	2.89939	2.28499	1.79668	0.489003	1.63565	2.33326	3.89868	4.14237	1.31263
CDCP2	0	0	0.448654	0	1.06378	0	0	0	0.714605	0
AL357673.2	0.897886	1.93293	1.83634	1.81434	3.06267	3.28993	2.33326	1.82665	3.78506	0.437545
CYB5RL	591.707	565.382	283.814	338.614	260.756	258.887	197.344	219.457	276.958	192.887
MRPL37	1772.43	1761.87	1090.04	976.468	929.904	1002.35	1048.79	958.805	678.677	787.857
SSBP3	2272.55	1820.82	3254.82	2416.69	3693.29	3614.39	2199.26	1763.89	783.369	1143.32
SSBP3.AS1	28.7323	37.6921	75.8247	85.5032	109.699	108.139	77.0587	48.9651	94.8416	80.8836
AL161644.1	1.79577	0	1.93807	0	2.53079	0.551424	2.3536	0.649779	1.42921	0
AL035415.1	0	0	0	0	0	0	0	0	0	0.87509
AC099796.1	0	0	0	0	0.489003	0	0	0	0.357303	0
AC099796.2	0	0	0	0	0	0	0.593484	0	0	0
HNRNPA1P63	0	0	0.34692	1.44794	0	0	1.73978	0.649779	0.499638	0
ACOT11	112.236	100.512	84.5709	114.559	108.789	87.5297	128.065	58.1029	2172.17	1534.92
FAM151A	4.48943	5.79879	5.95766	3.13864	5.50769	6.57985	26.6698	3.81688	81.3455	57.6575
AL590093.1	0	0	1.59115	1.81434	0.489003	0.551424	2.33326	1.25866	33.4962	19.327
MROH7	0	1.93293	6.60978	9.71619	12.122	11.4961	15.597	3.77598	397.58	260.601
MROH7.TTC4	0	0	0	1.06388	0	0.542115	0	0	45.2755	25.2145
TTC4	25.1408	21.2622	10.7728	19.7281	20.5036	14.7674	15.7394	18.3119	22.568	16.9296
PARS2	372.623	437.809	230.792	242.242	161.781	160.685	160.914	177.144	221.399	198.661
TTC22	41.3027	63.7867	5.18038	11.0228	1.02089	1.08423	0.593484	0	1.07191	0
AC096536.2	0	0	0	0.348737	0	0	0	0	0	0
LEXM	9.87674	12.564	2.8771	5.05896	1.55278	3.262	3.54057	1.90844	3.42776	0.437545
DHCR24	15997.6	12816.3	5954.98	7345.52	2076	2648.72	5590.92	4026.11	1819.38	1732.53
AC096536.3	1.79577	0	0.448654	0.366401	0	1.08423	1.16663	0	0.714605	0.437545
AC096536.1	0	0	0.34692	0.715138	0.531889	0	0.573148	1.25866	1.21424	0.437545
AL590440.2	2.69366	0	0	0	0.978006	0	0	0	0	0
TMEM61	13.4683	10.6311	1.48941	3.20929	0	0.542115	1.71944	3.208	1.35658	0
AL590440.1	0	0	0	0	0	0	0	0	0	0
BSND	33.2218	21.2622	0.448654	6.73199	1.55278	0.551424	0.593484	4.99375	0	0.437545
PCSK9	8051.34	8351.22	781.791	553.552	150.963	148.759	57.6974	79.4956	2.92812	2.76766
USP24	3114.77	2980.58	4463.93	2719.81	3655.22	3334.45	2730.97	2664.05	3053.93	3112.07
MIR4422HG	0	0	0	0	0	0	0	0	0.499638	0
GYG1P3	0	0	0.448654	0	0	0	0	1.21776	0	0
MIR4422	0	0	0	0	0.489003	0	0	0	0.357303	0
GOT2P1	0	0	0	0	0	0	0	0	0	0
MTCO2P34	0	0	0	0	0	0	0	0	0	0
RN7SKP291	0	0	0	0	0	0	0	0	0	0
RNU6.830P	0	0	0	0	0	0	0	0	0	0
Y_RNA.22	0	0	0	0	0	0	0	0	0	0
AL603840.1	0	0	0.34692	0.348737	0	0	0.573148	0.608882	0.85694	0.903568
LINC01753	0	0	0	0	0	0	0.573148	0	0	0
PIGQP1	0	0	0.448654	0	0.489003	0	0	0	0	0
LINC01755	0	0	0	0	0	0	0	0	0	0
AL353681.1	0	0	0	0	0	0.542115	0	0	0	0.87509
AC119674.1	1.79577	4.83232	2.28499	1.79668	3.01979	1.63565	2.88607	0	2.92812	7.2855
AC119674.2	0	0	1.14249	2.11009	0.531889	0	0.573148	0	0.714605	0
RPSAP20	0	0	0	0	0	1.08423	0	0.649779	1.21424	0.437545
LINC01767	0	1.93293	2.48846	2.84289	11.6759	11.5241	8.16642	3.1671	1.57155	0.466024
PLPP3	653.661	781.87	602.803	552.055	664.566	735.663	530.329	402.29	538.792	1073.59
RPL21P23	0	0.966465	0	0	1.46701	1.09354	2.29259	0.649779	1.21424	0.437545
RPL23AP85	0	0	0	0	0	0	0	0	0.85694	0.87509
AC099789.1	0	0	0.34692	0.366401	0	0	0	0	0	0
PRKAA2	632.111	473.568	512.714	565.185	1229.44	932.145	1008.11	794.488	2640.63	2561.32
FYB2	0	4.83232	336.186	230.071	440.811	206.586	52.5188	96.717	18.2804	26.175
AL360295.1	0	0	0.34692	0	0	0	0	0	0	0.437545
C8A	0	0	0.693841	0	1.50989	0	2.31293	0	0.357303	0
C8B	0	0	0	0	2.04178	0	0	0.649779	0	0
AL161740.1	0.897886	0	0	0	0.978006	0	0	0	0	0
DAB1	498.327	415.58	1086.28	764.019	1440.43	786.443	576.97	551.898	423.381	341.577
AL390243.1	4.48943	5.79879	9.75035	12.5767	6.57147	7.66408	2.88607	0.608882	5.14164	2.24468
RPS20P5	0.897886	0	0	0	0	0.542115	0	0.608882	0.357303	0.437545
DAB1.AS1	1.79577	0	0	0.348737	0.489003	1.64496	0	0	0	0
HNRNPA1P6	0.897886	0.966465	1.59115	1.08154	2.53079	1.10285	0	0	0	0
RPS26P15	0.897886	1.93293	0	0.366401	0	0.551424	0	0.608882	0.499638	0.437545
AL445193.2	0	0	0	0.366401	0	0	0	0	0	0
AL445193.1	0	0	0	0	0	0	0	0	0	0
AL357373.1	0	0	0	0.348737	0	1.10285	0	0	0	0.466024
OMA1	154.436	212.622	116.529	115.676	199.855	184.948	147.67	193.788	207.621	206.441
AL035411.2	0	0	0	0	0	0	0	0	0	0
RN7SL713P	0	0	0	0	0	1.08423	0	0	0	0
TACSTD2	17.0598	14.497	5.38384	8.26825	48.917	137.328	78.7578	206.984	173.108	0
AL035411.1	1.79577	0.966465	0.34692	0	0	1.62634	1.1463	0.649779	0	0.437545
MYSM1	4198.51	3715.09	1517.18	2022.56	1636.07	1660.11	1856.01	1788.1	2392.65	1933.17
AL136985.3	0	0	0	0	1.9989	0.542115	0.593484	0	1.07191	0
JUN	162.517	92.7806	186.59	266.16	384.902	435.836	534.521	283.031	1262.72	1111.51
LINC01135	0	0	0	0	0	0.542115	0	1.29956	6.71319	4.54632
AL136985.2	0	0	0	0.732802	0.489003	0	0	0	0.85694	0.932047
AL136985.1	0	0	0	0	0.531889	0	0	0	1.35658	0
AC105277.1	0.897886	1.93293	0.34692	1.0992	3.01979	2.18708	1.16663	0	2.78579	8.35995
LINC01358	3.59154	0.966465	0	0	0.978006	0	0	0	0.85694	2.33012
PHBP3	0.897886	0.966465	0.448654	0.732802	0	0	1.18697	0.608882	0	0
AL592431.2	0.897886	0	0	0	0	0	0	0	0	0
AL592431.1	8.08097	5.79879	0.448654	0	0	0	0	0	0	0
HSD52	0	0	0	0	0	0	0	1.29956	0.357303	0.437545
AC093424.1	0	4.83232	0.795574	0.366401	1.55278	1.09354	1.71944	4.46666	4.78434	0.903568
FGGY	125.704	138.204	160.393	98.5301	149.625	118.13	80.0871	106.986	84.6192	134.461
MIR4711	0	0	0	0	0.489003	0	0	0	0	0
AL035416.1	0	0	0	0.348737	0.489003	0	1.18697	0.608882	0.357303	0
HOOK1	1368.38	1459.36	322.505	457.516	708.911	621.344	696.235	911.984	1265.39	843.177
CYP2J2	9.87674	12.564	7.32191	4.29083	6.48569	5.99119	325.019	90.2556	499.722	726.632
RN7SL475P	0	0	0	0	0.531889	0	0.573148	0	0	0.466024
C1orf87	6.2852	11.5976	1.34596	3.19163	2.57367	0	16.3125	1.94934	0.357303	0.466024
PGBD4P8	0	0	0	0	0	0	4.11371	0	0	0
AC097066.1	0	0	0	0	0	0	0.593484	0	0	0
LINC01748	133.785	173.964	51.6757	70.2557	54.7678	63.3322	39.6045	62.8922	175.124	125.102
AC099792.1	0	0	0	0	0	0	0	0	2.07118	0
NFIA	33.2218	23.1952	26.9295	43.5528	29.3914	22.8712	38.4175	25.4549	538.723	508.567
NFIA.AS2	0	0	0	0	0.489003	0	0	0	1.85622	0
AC096947.1	0.897886	0	0	0	0	0	0	0.649779	3.64273	1.31263
NFIA.AS1	0	0	1.14249	0	0	0	0	0	1.07191	0.87509
AC099791.1	0	0	0	0	0	0	0	0	0	0.466024
TM2D1	89.7886	101.479	127.537	135.634	176.597	166.088	262.716	239.718	275.046	292.055
AC099791.2	0	0.966465	0.448654	0.715138	0.489003	1.62634	1.71944	0.608882	0.85694	0
PATJ	1800.26	1870.11	1199.35	1361.44	2000.82	1828.37	1830.88	1789.59	1447.48	856.528
RNU6.414P	0	0	0	0	0	0	0	0	1.85622	0.437545
RNU6.1177P	0	0.966465	0.897307	0	0.489003	0.542115	0.593484	0	1.21424	0
LAMTOR5P1	0	0	0.795574	0.732802	0	1.63565	1.18697	0	1.85622	0
RN7SL180P	0	0	0.34692	0.715138	0	0	0	3.1671	0.357303	0
MIR3116.1	0	0	0	0	0	0	0	0	0.499638	0
MIR3116.2	0	0	0	0	0	0	0	0	0	0
PIGPP2	0	0	0	0	0	0	0	0	0	0.466024
RPS15AP7	0	0	0	0	0	0	0	0.649779	0	0
L1TD1	8062.11	7129.61	859.893	1107.76	1288.31	831.988	530.655	700.461	41.7083	0
AL162739.1	25.1408	41.558	5.01863	2.82523	0.978006	2.17777	0	0	0	0
Y_RNA.23	0	0	0	0	0	0	0	0	0	0
KANK4	22.4471	14.497	12.9927	24.2748	110.514	68.1833	401.833	40.359	298.024	51.1513
RNU6.371P	0	0	0	0	0	0	0.573148	0	0.499638	0
USP1	1413.27	1473.86	1238.2	1224.83	1314.21	1256.71	866.437	991.575	788.578	693.363
DOCK7	1333.36	1325.02	1532.22	1459.06	1871.34	1698.32	2144.68	2086.36	1488.27	2111.8
AL451044.1	0	0	0.34692	0.732802	0.531889	0.551424	0.573148	0	0.714605	1.36959
ANGPTL3	8.08097	4.83232	2.14153	1.44794	2.4879	3.83204	8.12575	3.08531	4.35733	4.48936
AL138847.2	0.897886	5.79879	1.24423	2.51182	2.57367	3.80411	1.16663	3.73509	4.78434	2.24468
AL138847.1	0	0.966465	0.34692	1.44794	0.489003	4.9442	1.76012	0.649779	1.07191	1.39807
AC103923.1	9.87674	5.79879	9.09823	8.32124	10.655	5.99119	9.31272	15.1448	25.932	43.2574
ATG4C	281.936	285.107	234.751	184.532	264.806	208.436	207.396	277.996	201.271	186.459
AC099794.1	0	0	0	0	1.02089	0	0.573148	0	0.499638	0
AC099794.2	0	0	0	0	0	0	0	0	0.357303	0
LINC01739	0	0	0	0	0.489003	0	0	0	0.357303	0
AL162400.1	0	0	0	0	0	0	0	0	0.357303	0
AL162400.2	0	0	0	0	0	0	0	0	0	0
AC096543.1	1.79577	0	0	0	0.489003	0	0	0.649779	0	0
LINC00466	0.897886	6.76525	0.34692	0.715138	3.14845	1.08423	0	0	1.07191	0.437545
RNA5SP49	0	0	0	0	0	0	0	0	0.357303	0
AC096543.2	0	0	0	0	0	0	0	0	0	0.87509
RPSAP65	0	0	0	0	0	0	0	0	0	0
FOXD3.AS1	483.96	467.769	29.6397	70.8386	12.2078	12.571	1.16663	17.6622	0	0
FOXD3	295.404	314.101	26.2122	83.9185	12.611	12.0289	0	12.5866	0.357303	0.932047
MIR6068	0	0	0	0	0	0	0	0	0.357303	0
Y_RNA.24	0	0	0	0	0	0	0	0	0	0
AL049636.1	0	4.83232	0.34692	0	0.489003	0	1.73978	0	3.14309	0.903568
ALG6	313.362	378.854	184.523	219.512	179.806	192.621	162.284	226.446	121.555	96.977
ITGB3BP	253.204	334.397	323.504	329.282	351.418	320.986	202.77	318.968	186.061	140.092
EFCAB7	33.2218	31.8933	92.5369	102	86.0122	68.3322	97.6273	103.737	131.135	164.983
RN7SL488P	0	0	0	0	0	0	0	0	0	0
RNU7.123P	0	0	0.448654	0	0.531889	0.551424	1.16663	0	2.57082	0
DLEU2L	8.97886	8.69818	13.1178	27.2636	25.9255	27.3106	19.2189	20.1386	46.0657	35.5343
DLEU2_6	0	0	0	0	0	0	0	0	0	0
DLEU2_5	0	0	0	0	0	0	0	0	0	0
DLEU2_4	0	0	0	0	0	0	0	0	0	0
DLEU2_3	0	0	0	0	0	0	0	0	0	0
DLEU2_2	0	0	0	0	0	0	0	0	0	0
DLEU2_1	0	0	0	0	0	0	0	0	0	0
PGM1	2383.89	2913.89	1928.17	1599.18	1654.3	1443.78	2609.32	1674.29	3376.1	3344.76
RN7SL130P	2.69366	1.93293	1.93807	1.76135	0.489003	0.551424	2.31293	0.649779	13.7807	9.93925
ROR1	3495.47	2944.82	3462.06	3507.93	2990.39	3313.34	1615.81	1965.61	1521.71	1637.86
AL161742.1	0.897886	1.93293	1.59115	4.2555	3.55168	4.91627	2.31293	0.649779	1.92885	1.31263
CFL1P3	0.897886	3.86586	1.48941	5.00597	2.65944	4.35554	1.76012	0.649779	1.49891	1.31263
RNU6.809P	0	0	0.448654	0.348737	0	0	0	0	0	0.466024
Y_RNA.25	0	0.966465	1.14249	0.697475	0	0	0	0	0.357303	0
ROR1.AS1	4.48943	7.73172	21.5222	26.1644	27.3925	21.8987	15.841	16.3217	21.5688	23.6352
UBE2U	1.79577	0.966465	0	0.348737	1.55278	0.542115	0	0	0.357303	0.437545
RNU7.62P	0	0	0	0	0	0	0	0	0	0
CACHD1	3557.42	2572.73	5243.67	3613.07	922.131	750.242	988.222	696.808	3735.88	2822.09
MIR4794	0	0	0	0	0	0	0	0	0	0
RAVER2	1026.28	978.062	895.487	901.687	766.183	799.033	681.622	765.989	1665.29	1499.86
JAK1	967.921	1114.33	563.336	706.323	613.179	821.585	1356.09	1148.91	2220.49	2461.12
AL606517.2	0	0	0	0	0	0	0	0	0	0
AL606517.1	0.897886	0	0	1.04621	0	1.10285	0	1.25866	0.499638	0.466024
LINC01359	2.69366	3.86586	3.52922	7.62377	7.67813	8.19689	5.85349	1.86754	6.57085	9.1496
SLC2A3P2	0	0	1.93807	1.41261	1.50989	3.28993	1.1463	0	3.9274	4.51784
AL357078.3	0	0	1.14249	1.06388	0.531889	0	0	0	4.78434	1.36959
RNU6.1176P	0	0	0.34692	0	0	0	0	0	1.92885	0.87509
MIR3671	8.97886	8.69818	4.32479	6.80265	3.63745	4.90696	4.07304	2.55822	7.64276	6.70557
MIR101.1	0	0	0	0	0	0	0	0	0	0
AL357078.1	0	0	1.24423	0	0	0	0	0	0.357303	0
AL357078.2	0	0	0	0	0	0	0	0	1.07191	0
MRPS21P1	0	0	0	0	0	0	0	0	0.499638	0
AK4	4353.85	4542.38	1501.76	1832.4	1712.48	1758.82	2997.19	1575.9	4557.38	3822.59
RPS29P7	0	0	0.448654	0.348737	0	0	1.76012	0	0.499638	0
DNAJC6	188.556	163.333	651.891	342.119	2720.17	2294.79	3462.8	2510.92	2835.46	2502.7
AL139294.1	0	0.966465	0	0.348737	2.57367	1.08423	2.33326	1.86754	3.28543	1.34111
COX6CP13	0	0	0.795574	0	1.06378	0	1.18697	0	2.57082	0.87509
RNU2.15P	0	0	0	0	0.489003	0	0	0.649779	0	0
LEPROT	650.069	705.519	826.669	877.938	1392.41	1340.51	2214.72	2066.42	2027.24	2906.3
LEPR	554.893	669.76	615.946	672.39	1370.39	1570.43	807.533	1228.24	1304.17	752.427
AC119800.1	0	0	1.93807	1.4656	0.978006	2.19639	0.593484	3.12621	1.07191	0.466024
AC097063.1	0.897886	1.93293	0	0.732802	1.50989	2.16846	0	1.29956	1.21424	0.932047
RN7SL854P	0	0	0	0	0.531889	0	0	0	0.357303	0
PDE4B	494.735	345.028	99.9086	311.796	92.4121	149.18	53.6447	168.82	263.673	205.576
AL590783.1	0	0	0	0	0	0	0	0	0.499638	0
RNU4.88P	0	0	0	0	0	0	0	0	0	0
SGIP1	58.3626	53.1556	58.9874	130.306	256.75	509.843	152.256	579.543	282.256	206.109
MIR3117	0.897886	0	0.448654	1.0992	1.55278	4.36485	1.78045	5.03465	2.57082	1.77866
AL139147.1	1.79577	0.966465	2.48846	2.84289	5.63635	10.9261	3.49989	17.744	13.3567	8.5127
TCTEX1D1	19.7535	29.9604	31.3509	78.3957	12.9112	19.6651	63.9817	44.294	20.1425	7.2855
INSL5	0	0	0	0	0	0	1.71944	0	0	0.437545
WDR78	12.5704	4.83232	19.811	21.975	24.2441	17.4594	27.4057	43.0808	41.4904	66.3514
AL592161.1	0	0	0	0	0.978006	0	0	0	0	0.437545
MIER1	765.896	756.742	746.14	645.204	957.931	864.447	781.545	850.555	798.492	646.367
SLC35D1	226.267	195.226	263.249	249.574	430.439	373.234	551.406	420.348	675.493	500.825
C1orf141	0	0	0	0.366401	1.55278	1.08423	0.573148	0	0	0
SNORA31	0	0	0	0	0	0	0	0	0	0
AL133320.1	0	0	0	0	0	0	0	0	0	0
IL23R	0	0	0.693841	0	1.55278	0	1.71944	0.649779	0	0.466024
RNU6.586P	0	0	0	0	0.489003	0	0	0	0	0
RNU4ATAC4P	0	0	0	0	0	0	0	0	0	0
AL389925.1	0	0	0	0	0	0	0	0	0	0
IL12RB2	40.4049	45.4238	27.1513	34.362	15.6737	10.9168	5.85349	4.42576	9.35371	1.75018
SERBP1	11030.5	12184.2	7549.72	7234.88	7653.39	8015.62	6606.85	7342.47	7744.99	6115.3
RNU6.387P	3.59154	18.3628	7.16017	8.21526	9.14514	10.8982	1.76012	0	8.42707	6.76252
LINC01702	0	0	0	0	0	0	0	0	0	0
RNU6.1031P	0	0	0	0	0	0	0	0	0	0
AL590559.1	0	0	0	0	0	0	0	0	0	0
RN7SL392P	0	0	0	0	0	0	0	0	0	0
HNRNPCP9	0	0	0	0	0	0	0	0	0	0
GADD45A	101.461	100.512	388.281	179.138	631.306	493.915	677.301	616.008	370.881	447.266
GNG12	1989.71	1790.86	572.685	604.045	841.601	920.06	1967.68	2447.31	3232.49	6802.77
RNU7.80P	0	0	1.04076	0	0	0	0	0	0	2.2162
GNG12.AS1	2.69366	12.564	95.1688	87.0394	61.4596	49.2186	60.234	77.3054	98.6963	126.937
AL157407.1	0	0	0	0	0	0	0	0	0.357303	0
DIRAS3	4.48943	1.93293	22.9099	19.8472	9.63414	11.0006	34.8363	29.1128	148.056	138.285
ARL5AP3	0	0	5.2221	4.63957	1.9989	4.89765	4.03237	2.59912	25.3568	37.1887
WLS	84.4012	50.2562	5300.74	4039.7	3313.32	2890.02	3089.61	4281.8	2066.38	4740.41
CTBP2P8	1.79577	0.966465	39.4735	48.3337	20.7353	21.936	23.4343	28.5811	26.9951	53.3675
MIR1262	0	0	1.34596	1.08154	0.489003	1.65427	1.16663	0	0	2.73918
RPS7P4	0	1.93293	0	0	0	0.542115	0	0	0	0.437545
COX6B1P7	0	0	0	0	0	0	0	0	0.357303	0
ELOCP18	0	0	0	0	0	0	0	0	0	0
AL139413.1	0	0	0	0	0	0	0	0.608882	0	0
RPE65	0	0	0	0.348737	1.02089	0.542115	0.593484	1.82665	7.28546	21.6572
DEPDC1	1469.84	1416.84	619.195	522.02	1211.4	1203.82	509.615	907.318	419.236	502.594
AL138789.1	43.0985	38.6586	22.7064	18.3155	19.8859	23.5158	11.6867	14.6586	4.49967	6.67709
DEPDC1.AS1	0	1.93293	1.69288	0	0	0.551424	0.573148	0.649779	0.357303	0
TXNP2	0	0	0	0	0	0	0	0	0.357303	0
LINC01707	0	0	0.448654	0.348737	0.531889	0.551424	0	0	0.499638	0.466024
AL512271.1	0	0	0	0	0	0	0	0	0.999275	0
LINC01758	0	2.89939	0.34692	0.348737	0	0	0	0	1.71388	0
LRRC7	18.8556	28.9939	12.9561	20.7743	42.0882	62.3876	101.025	42.1856	108.776	44.2749
SGO1P1	0	0	0	0	0	0.542115	0	0	1.42921	0
RN7SL538P	0	0	0	0	0.531889	0	0	0	0	0
PIN1P1	0	0	0	0	0	0	0	0	0	0
AL158840.1	0	0	0	0	0.531889	1.09354	3.49989	1.29956	4.00003	0.437545
LRRC40	785.65	814.73	522.381	533.529	640.468	603.045	758.473	675.983	525.421	482.707
RN7SL242P	0.897886	0	0	0	0.489003	0	0.593484	0	0	0.466024
SRSF11	4284.71	4484.4	4822.84	5091.67	5196.8	5332.17	4781.72	4791.37	6072.16	5223.08
AL353771.1	1.79577	0	0.897307	1.81434	0.978006	3.28993	1.16663	0.649779	3.00076	4.10878
ANKRD13C	504.612	540.254	499.192	426.205	625.043	618.971	534.809	652.55	514.662	524.386
HHLA3	217.288	201.991	297.654	279.734	218.642	220.895	148.634	166.675	133.267	135.126
AL158839.1	8.08097	11.5976	10.0373	11.1111	13.8892	9.86978	4.62585	1.86754	14.2833	16.0934
CTH	980.491	662.995	312.191	284.912	273.916	261.551	189.856	231.144	104.489	91.4701
Metazoa_SRP.6	0	0	0	0	0.531889	0	0.593484	0	0	0
AL354872.2	6.2852	0	9.99554	10.0296	7.23201	3.83204	2.29259	6.33421	2.42849	1.86409
AL354872.1	0	0.966465	0.897307	0	0	0	0	0	0	0
CASP3P1	0.897886	0	0	0	0	0	0	0	0	0
LINC01788	0	0	0	0	0.978006	0	0	0	0.714605	0
AL513285.1	0	0	0	0	0	0	0	0	0.714605	0
PTGER3	30.5281	19.3293	5.06035	1.44794	65.2769	15.8703	2.88607	5.56174	202.694	551.205
AL031429.1	0	0	0	0	0	0	0	0	0	0
AL031429.2	0	1.93293	0	0	0	1.65427	0	0	3.85477	7.22855
ZRANB2.AS1	0	0.966465	1.04076	3.24462	3.63745	2.74781	1.73978	2.47643	3.28543	5.01234
ZRANB2	1250.75	1432.3	1227.58	1378.19	1402.95	1426.51	1520.66	1568.76	1946.46	1828.5
MIR186	0.897886	6.76525	4.22306	6.85564	10.1231	8.74831	7.02013	9.33772	12.2121	12.2694
ZRANB2.AS2	6.2852	2.89939	9.38514	7.22204	6.57147	7.62685	12.3005	10.6373	11.4975	25.2714
AL358453.1	0	0	0	0	0.531889	0	0.593484	0	0	0
NEGR1	37.7112	51.2226	8.44612	17.8785	13.2287	13.1411	7.53226	22.1697	57.6388	115.571
AL354949.1	0	0	0	1.08154	0	0	0	0.608882	0.357303	0.437545
AL359821.1	0	0	0.34692	0	0	0	0	0	0	0.437545
NEGR1.IT1	0	0	0	0	0	0	0	0	0.357303	0
GDI2P2	6.2852	2.89939	4.0796	1.41261	2.44501	0.551424	1.1463	4.46666	2.35585	4.95539
RPL31P12	1.79577	0	0	1.44794	1.02089	1.62634	1.18697	0	4.07266	4.40393
RNU6.1246P	3.59154	4.83232	1.24423	2.11009	1.02089	3.83204	2.94708	0.608882	6.14092	9.03568
AL583808.1	45.7922	49.2897	12.3223	17.3884	12.2936	9.83254	17.4995	16.4444	12.857	25.8799
AL583808.2	1.79577	3.86586	2.08152	1.44794	3.55168	1.62634	5.81282	5.07554	4.642	3.67123
AL732618.1	2.69366	5.79879	0	0	0	0	0	0	0.499638	0
KRT8P21	0.897886	3.86586	0.448654	0.366401	0	0	0.573148	0	0.357303	0
RN7SKP19	0	0	0	0	0	0	0	0	0	0
LINC01360	0	3.86586	0	0	0	0	0	0	0	0
LINC02238	0	0	0	0	0.531889	0	0	0	0.714605	0
RNA5SP50	0	0	0	0	0	0	0	0	0	0
RNU4ATAC8P	0	0	0	0	0	0	0	0	0	0
LRRIQ3	3.59154	11.5976	9.93553	10.6741	12.0792	15.8517	8.65822	14.3724	13.9986	11.6325
FPGT	96.0738	115.009	146.761	130.601	293.845	313.229	266.362	370.615	147.269	308.888
FPGT.TNNI3K	7.18308	16.4299	24.1124	30.5743	51.748	48.1343	43.2874	65.3277	299.697	750.562
TNNI3K	0	0	2.83538	4.65723	13.1	3.83204	15.1662	25.1732	202.845	490.335
AC093158.1	0	0	0.693841	1.0992	0.531889	3.83204	1.73978	1.29956	25.0692	39.8709
AC105271.1	0	0	1.69288	0.732802	4.21222	0.551424	2.33326	1.25866	29.2145	51.2471
LRRC53	0	0	0	1.0992	8.61325	7.09404	3.49989	12.6275	35.7795	120.089
ERICH3	4.48943	0	0.34692	0	4.04068	0.542115	2.90641	1.21776	5.85625	15.6273
ERICH3.AS1	0	0	0	0	0	0	0	0	0.357303	0
AC135803.1	0.897886	0	0.34692	0.366401	0.978006	1.63565	1.1463	1.25866	8.71174	6.791
CRYZ	288.221	288.006	257.721	225.445	430.164	354.26	1057.28	527.252	500.378	855.521
TYW3	652.763	642.699	340.706	282.192	473.6	321.482	426.251	392.175	536.933	532.639
AC133865.1	0	0	0	0	0.531889	0	0.573148	0	0	0.437545
AC099786.3	0.897886	0	0	4.65723	0	0	0	1.25866	1.07191	0
AC099786.1	0	0	0.34692	2.16308	0	0	0	0	0.357303	0.903568
LHX8	8.08097	15.4634	11.018	70.3354	27.6927	24.0206	34.3851	19.4888	14.0713	21.5432
AC099786.2	0	2.89939	0.693841	6.76732	1.50989	2.71988	0	0	0.499638	0
RNU6.622P	0	0	0	0	0	0	0	0	0	0
SLC44A5	347.482	301.537	423.269	447.469	765.608	1015.03	586.076	898.434	864.668	1414.74
AC093156.1	0	0	0	0	0.531889	0	0	0	0	0.466024
RNU6.503P	0	0	0	0	0.531889	0	0	0	0	0
AL096829.1	0	0	0	0	0	0	0	0	0.357303	0
AL096829.2	0	4.83232	1.04076	0.697475	0.489003	1.09354	1.78045	0.649779	0.85694	0.466024
AL357314.1	0	0	0	0	0.531889	0	0	0	0	0
ACADM	471.39	453.272	655.654	568.221	727.081	595.886	1251.84	919.782	1405.85	1527.88
DLSTP1	7.18308	14.497	25.6201	28.5702	17.3123	24.5907	33.3202	25.6594	47.7796	56.9248
RABGGTB	1257.04	1115.3	920.036	1084.78	1151.25	1069.67	1283.69	929.701	1591.73	1292.27
SNORD45C	0	0	0	0	0	0	0	0	0	0
SNORD45A	0	0	0	0	0	0	0	0	0	0
SNORD45B	0	0	0	0	0	0	0	0	0	0
MSH4	2.69366	9.66465	9.24169	16.2892	11.2298	4.39278	8.12575	8.16085	17.7808	6.62013
ASB17	0	0	0	0	0	0	0	0	0	0
AC092813.1	0	0	0	0	0	0	0	0	0	0
AC092813.2	0	0	0	0	0	0	0.593484	0	0.357303	0.932047
ST6GALNAC3	418.415	444.574	744.213	590.933	355.322	392.899	441.97	837.569	335.265	1091.99
AC103592.1	0	0	1.14249	0.732802	0	0	0.573148	0.608882	0	1.34111
AC104458.1	0	2.89939	3.42748	0.348737	1.02089	0	0.573148	2.55822	0.499638	4.05182
TPI1P1	10.7746	21.2622	5.56902	2.49415	3.06267	5.45839	14.6337	6.25241	8.57233	8.21755
RNU6.161P	0	0	0	0	0	0	0	0	0	0
LINC02567	0	0	0	0	0	0	0	0	0	0
ST6GALNAC5	78.116	93.7471	43.3862	72.1361	36.7521	55.1632	18.6254	65.1232	107.702	105.756
MIR7156	0	0	0	0	0	0	0	0	0.499638	0
AL035409.1	1.79577	2.89939	0	2.87822	0.489003	1.63565	1.16663	0.649779	2.57082	1.80714
PIGK	561.179	586.644	377.133	345.42	591.534	592.512	625.05	821.452	568.164	690.585
AC113935.1	19.7535	33.8263	13.9734	14.2321	13.1429	9.86978	9.92654	11.4097	12.9994	9.79686
AC093433.1	0.897886	0.966465	0.693841	0.348737	1.06378	0	0.573148	0.608882	0.357303	0
AK5	116.725	85.0489	18.7703	21.1584	28.6707	27.3571	11.707	28.2176	28.2152	4.48936
AC095030.1	0	0	0	0	0	0	0	0	0	0
[truncated: 56,304 more rows]

## Sheet: GATA6_Hom
Supplemental Table 2: Mean Differential Gene Expression in GATA6 Homozygous Lines
Gene	GATA6 WT D0	GATA6 -/- D0	GATA6 WT D4	GATA6 -/- D4	GATA6 WT D8	GATA6 -/- D8	GATA6 WT D12	GATA6 -/- D12	GATA6 WT D30	GATA6 -/- D30
DDX11L1	0	0	0	0	1.02089	0	0.573148	0.625053	0	0
WASH7P	28.7323	27.6655	33.581	36.6843	36.5806	19.8968	19.6904	18.3227	45.1332	33.3807
MIR6859.1	5.38731	5.86845	8.95478	12.8043	3.01979	1.66585	2.92675	6.26828	7.35516	2.31427
MIR1302.2HG	0	0	0	0	0	0.667597	0	0	0	0
MIR1302.2	0	0	0	0	0	0	0	0	0	0
FAM138A	0	0	0	0	0	0	0	0	0.499638	0
OR4G4P	0	0	0	0	0	0	0	0	0	0
OR4G11P	0	0	0	0	0	0	0	0	0.357303	0
OR4F5	0	0	0	0	0	0	0	0	0	0
AL627309.1	0	0	0	0.393543	0	0.555285	0.593484	0	0.714605	0.470737
AL627309.3	0	0	0	0	0	0	0	0	0	0
CICP27	1.79577	4.19175	0.897307	2.1692	1.59567	2.55808	1.73978	0.785755	1.85622	3.24261
AL627309.7	14.3662	9.22184	32.0864	36.1985	17.9728	27.1217	20.9384	22.1086	19.2129	21.3517
AL627309.8	44.8943	15.9286	57.0779	86.0166	27.4182	58.2491	25.6456	43.3959	29.4962	37.0809
AL627309.2	10.7746	0.838349	1.7346	3.22179	2.04178	2.88874	1.18697	2.66091	2.42849	5.12556
AL627309.5	10.7746	22.6354	16.1984	19.1198	10.6979	15.1176	7.02013	18.1976	13.284	10.6693
RNU6.1100P	0	0	0.34692	0.393543	0	0.667597	0	0	0	0.457599
AL627309.4	0	0	0	0	0	0	0	0	0	0
FO538757.2	0	0	0	0	2.08467	1.22288	0	0	0	0
FO538757.1	82.6055	98.9252	79.946	114.356	73.3928	68.8057	69.5671	60.1826	71.9162	61.2965
MIR6859.2	0	0	0	0	0	0	0	0	0	0
AP006222.1	8.08097	5.86845	10.4025	11.313	9.18802	11.9979	12.6906	10.9651	25.1389	12.0158
RPL23AP24	0	0	0	0	0	0	0	0	0	0.457599
AL732372.1	0	0	0	0	0	1.33519	0	0	0	0
AL732372.2	38.6091	32.6956	54.7512	66.6859	34.2213	50.4688	40.1166	45.7354	49.0635	47.8028
WBP1LP7	0	0	0	0	0	0	0	0	0	0
OR4F29	0	0	0	0	0	0	0	0	0	0
CICP7	0	0	0	0	0	0	0	0	0	0
AL732372.3	4.48943	5.0301	1.79461	3.67935	2.53079	3.78096	1.18697	2.66091	1.71388	4.60227
U6	0	0	0	0.329523	0	0	0	0	0	0
AL669831.3	8.97886	0	7.89573	5.98601	1.55278	8.89083	6.97945	7.05404	6.28325	4.14467
AC114498.1	0	0	0	0	0	0	0	0	0	0
MTND1P23	16.1619	16.767	10.5876	11.6425	16.8233	22.2365	32.1129	16.9119	19.7852	12.526
MTND2P28	2167.5	1822.57	2117.19	2079.62	2420.89	2718.69	3749.46	3511.35	3452.87	2492.34
MTCO1P12	394.172	400.731	354.208	350.821	509.846	587.151	640.521	502.641	1803.14	572.584
MIR6723	0	0	0	0	0	0	0	0	0	0
MTCO2P12	24.2429	14.2519	10.3842	13.1526	15.4849	19.7845	18.5644	15.6441	23.9973	26.8955
MTATP8P1	1.79577	0.838349	0.34692	2.82824	3.06267	0.555285	1.18697	2.19656	1.21424	1.38594
MTATP6P1	14037.5	11721	11031.4	11132.7	11558.7	15239.5	15118.5	15214.1	16995.4	13528.3
MTCO3P12	103.257	36.049	15.4628	24.0175	25.9255	44.9097	36.1452	32.77	63.6983	32.3998
WBP1LP6	0	0	0	0	0	0	0	0	0	0
OR4F16	0	0	0	0	0	0	0	0	0	0
CICP3	1.79577	0	0.897307	0	1.59567	1.11057	0.573148	0.785755	0.357303	1.38594
AL669831.1	68.2393	70.4214	86.1906	132.485	90.2589	74.0342	71.6767	87.756	66.272	57.9882
RNU6.1199P	0	0	0	0	0	0	0	0.625053	0.357303	0
AL669831.2	1.79577	0	0.897307	0.393543	0	0	0	0	0.357303	0.470737
AL669831.5	43.9964	56.1694	40.2925	49.2419	51.6622	32.1256	40.4013	37.3061	101.842	46.8744
AL669831.4	0.897886	1.6767	3.87614	7.48674	5.50769	2.88874	1.78045	4.69678	4.85697	5.58316
FAM87B	6.2852	6.7068	3.1823	8.41129	3.10556	6.22672	6.36563	3.44667	14.353	5.58316
LINC01128	253.204	256.535	250.212	193.106	534.664	463.316	936.371	511.552	1328.17	467.122
LINC00115	4.48943	10.8985	11.5867	11.1115	4.04068	4.33624	5.83316	4.37537	17.4961	8.79949
FAM41C	0.897886	0	0.448654	0.659045	0	1.22288	1.16663	0	0	0
TUBB8P11	3.59154	0	1.24423	1.38211	0.531889	0	1.18697	0	0	0.457599
AL669831.6	0	0	0	0.787087	0	0	0	0.625053	0	0
AL645608.7	2.69366	4.19175	19.1355	26.2224	21.9277	10.669	10.52	1.25011	9.49605	7.87115
AL645608.3	8.97886	19.282	239.914	184.067	265.26	118.158	93.924	30.0913	104.558	101.62
AL645608.5	0	0	0	0.329523	0.489003	1.33519	0	0	0	0
AL645608.1	23.345	29.3422	1063.78	663.754	985.572	810.233	467.945	107.043	416.348	391.782
SAMD11	23.345	4.19175	1500.92	613.529	1246.81	995.912	384.131	126.919	155.972	289.378
NOC2L	2876.83	3199.14	1832.72	1679.98	1489.22	1530.78	1578.79	1313.13	1113.38	1623.61
KLHL17	542.323	560.856	690.942	664.385	446.567	455.523	371.643	405.224	183.249	313.92
PLEKHN1	68.2393	68.7447	58.789	59.3912	64.8481	29.6861	53.8481	15.8048	30.8499	15.8343
PERM1	10.7746	11.7369	4.9169	11.0381	5.67923	5.22219	8.20709	5.48253	11.0705	5.09928
AL645608.8	0.897886	0.838349	22.156	6.90114	18.5649	15.7851	19.3206	19.2692	3.9274	14.3826
HES4	6.2852	9.22184	158.048	51.6747	251.971	114.601	282.861	282.305	93.9091	139.027
ISG15	135.581	122.399	137.741	166.388	144.855	140.282	244.297	79.7555	75.1987	67.6372
AL645608.4	0	0	0.34692	0	0.489003	0.667597	0.573148	1.41081	0.999275	2.34055
AL645608.2	0.897886	0	1.7346	1.83968	7.7639	2.00279	6.44698	2.35726	26.998	2.31427
AGRN	10501.7	10760.2	13823.1	19880.7	18672.4	19080.8	13732.7	15911.9	5812.43	13938.6
AL645608.6	0	0	0	0	0	0	0	0	0	0
AL390719.1	36.8133	36.8874	28.7841	65.1494	31.8364	30.3474	31.0479	33.538	10.1409	18.1091
AL645608.9	1.79577	0	0	3.74337	0.489003	1.77817	3.49989	4.23242	0	2.77187
RNF223	0.897886	0	1.38768	2.04116	4.65834	0.667597	8.20709	2.35726	4.642	1.88295
C1orf159	206.514	202.881	282.984	310.395	316.339	334.689	314.441	239.892	143.69	166.654
LINC01342	2.69366	1.6767	0	0	0	0	0	0	0	0.457599
MIR200B	0	0	2.24327	2.63618	0.531889	0	0	0	0	0
MIR200A	0.897886	0	1.79461	1.97714	0	0	0	0	0	0
MIR429	0.897886	0	6.7298	5.79395	0	0	0	0	0	0
AL390719.2	20.6514	7.54515	28.8573	44.5759	3.01979	0	4.03237	0	0	0
TTLL10.AS1	3.59154	1.6767	4.42652	62.1404	1.46701	0	0	0	0	1.39907
TTLL10	5.38731	6.7068	4.87518	114.139	1.46701	3.22567	0	0	0	0.470737
TNFRSF18	2.69366	7.54515	23.1734	43.1561	2.12755	3.78096	1.71944	2.19656	0.357303	0
TNFRSF4	4.48943	0	0.34692	4.924	0.531889	3.66864	0.573148	2.03586	0.714605	0
SDF4	885.315	871.883	1415.99	1277.73	905.754	1068.18	1425.44	1296.48	1133.01	1464.33
B3GALT6	91.5843	59.5228	452.055	258.942	375.877	464.62	463.197	444.065	372.374	501.181
C1QTNF12	12.5704	25.9888	86.1672	69.9453	41.9596	20.5706	15.7597	25.0909	22.9951	14.9453
AL162741.1	0.897886	2.51505	5.26382	7.02918	5.10446	6.11441	4.64619	5.80393	0.714605	5.98821
UBE2J2	576.443	565.886	682.216	600.021	608.049	691.296	638.989	661.956	425.06	553.63
LINC01786	3.59154	3.3534	4.67171	10.315	3.46591	8.11092	5.81282	4.85748	6.64056	5.08614
SCNN1D	32.3239	37.7257	109.609	185.257	109.407	105.923	140.772	89.9526	173.32	63.4925
ACAP3	582.728	532.352	690.143	1036.95	881.45	1156.07	1398.18	1708.81	752.923	1062.64
MIR6726	0	0	0	0	0	0	0	0	0	0
PUSL1	333.116	336.178	265.223	232.095	215.76	274.668	233.818	245.41	149.389	207.358
INTS11	1862.21	1877.06	1684.78	1775.32	1329.26	1174.28	1168.15	1135.36	1036.66	1019.89
MIR6727	0	0	0	0	0	0	0	0	0	0
AL139287.1	17.0598	17.6053	19.5241	28.3088	20.0575	21.7872	19.8327	10.9651	25.9987	15.311
CPTP	270.264	271.625	296.598	282.913	256.132	344.147	498.03	438.976	312.725	404.413
TAS1R3	10.7746	5.0301	17.3592	21.6374	12.7826	9.55843	7.59327	21.7872	15.0735	13.9513
DVL1	1018.2	1073.93	1423.64	1282.85	959.973	888.635	810.728	884.31	626.247	647.626
MIR6808	0	0	0	0	0	0	0	0	0	0
MXRA8	221.778	194.497	2061.64	3009	1467.46	3159.16	1171.67	2783.32	499.98	1454.1
AURKAIP1	520.774	587.683	553.824	481.828	399.203	366.54	675.093	385.009	320.441	321.883
NDUFB4P8	0	0	0	0	0	0	0	0	0	0
CCNL2	2182.76	2299.59	2977.59	4001.16	2699.72	3120.07	2838.72	4454.47	2395.26	3010.53
AL391244.1	281.936	334.501	262.91	245.166	180.261	190.751	190.202	147.153	164.323	192.466
MRPL20	148.151	159.286	229.016	218.662	200.309	184.306	284.516	231.141	180.117	188.021
RN7SL657P	0	0	0	0	0	0	0	0	0	0
AL391244.3	87.0949	99.7636	94.4698	72.1974	37.9016	50.9055	16.9263	14.7154	77.6331	63.5057
ANKRD65	28.7323	28.5039	45.9581	73.4703	22.1594	15.1113	13.4061	20.3764	6.28325	5.98821
AL391244.2	2.69366	0.838349	3.87614	3.28581	1.9989	1.22288	0.593484	0	1.35658	0
TMEM88B	1.79577	0.838349	7.54881	6.05003	3.14845	6.33275	0	3.44667	0.499638	1.84354
LINC01770	3.59154	7.54515	16.1149	14.3973	11.1869	8.7848	13.4264	8.78625	39.2072	3.21633
VWA1	486.654	539.897	817.229	942.596	480.257	701.965	634.407	878.881	288.806	623.577
ATAD3C	8.97886	14.2519	8.26094	10.782	22.3738	12.2288	17.4791	22.3945	17.6414	20.384
ATAD3B	624.031	592.713	490.217	489.902	395.746	476.761	390.74	619.72	287.659	505.825
AL645728.2	0	0	0.795574	2.49872	0.531889	0	4.07304	6.58969	5.56865	1.8304
ATAD3A	797.322	848.41	518.67	531.101	457.548	560.585	630.819	598.897	349.777	507.209
TMEM240	39.507	36.049	68.748	79.7199	57.9591	68.4876	51.8236	46.3605	67.6315	29.1703
SSU72	1178.92	1243.27	1272.99	1196.65	1053.67	1126.28	1210.72	1088.98	960.933	1176.73
AL645728.1	7.18308	8.38349	9.09823	9.66536	5.14734	13.7886	8.16642	5.32183	11.5702	15.3504
AL691432.3	0	0	0	0	0	0	0	0	0.357303	0
FNDC10	275.651	218.809	226.204	267.717	185.416	310.805	252.545	195.71	468.746	399.537
AL691432.2	78.116	104.794	81.8841	88.1952	48.814	74.7018	74.5017	41.5207	194.328	78.5824
MIB2	1000.24	1039.55	1809.06	4285.67	1341.99	1224.61	1217.17	1033.43	1856.92	935.432
MMP23B	5.38731	5.0301	41.7168	90.7862	34.8819	23.5717	10.459	22.0908	10.5709	5.54374
CDK11B	674.312	692.477	559.189	699.892	528.513	541.462	536.549	613.649	378.855	444.947
FO704657.1	0	0	0	0	0	0	0	0	0	0
SLC35E2B	1647.62	1535.02	1587.16	1919.28	1609.11	1510.11	1273.39	1259.3	1185.66	1301.14
AL691432.1	18.8556	24.3121	34.4366	58.4309	44.8335	37.4538	36.6981	45.2888	46.4142	37.5779
MMP23A	1.79577	0	4.18134	3.02031	1.02089	0.555285	1.18697	1.25011	0.357303	0.928336
CDK11A	35.9154	32.6956	31.9247	73.3498	40.8785	39.3568	42.5109	42.5924	36.7817	25.0914
AL031282.2	17.9577	29.3422	48.1648	66.9608	38.751	36.4681	25.7066	16.9297	42.9894	34.4798
AL031282.1	79.0139	94.7335	141.748	194.064	119.565	111.725	90.2207	66.7901	149.18	118.972
SLC35E2	74.5245	93.8951	121.099	125.74	80.1185	92.1465	72.9043	70.4871	124.84	116.239
NADK	1301.04	1187.94	1092.62	945.349	947.156	1045.06	920.761	1112.36	550.769	1001.64
GNB1	8060.32	8045.64	5896.64	5257.1	6647.77	8137.88	7508.94	8843.85	3603.27	8154.36
AL109917.1	0.897886	1.6767	2.63191	2.62676	1.02089	3.78096	5.28035	2.19656	4.42704	6.00134
CALML6	0.897886	3.3534	6.50805	6.97458	0.489003	1.89048	3.49989	3.91102	3.21279	6.02762
TMEM52	192.148	201.204	133.578	86.3386	62.5061	64.7004	27.4057	57.3965	35.9974	54.1829
CFAP74	3.59154	10.8985	6.91498	239.985	2.53079	8.22951	1.78045	0.785755	41.9901	2.79815
AL391845.2	6.2852	5.0301	0.693841	2.49872	0	0	0	0	0	1.38594
GABRD	30.5281	23.4738	1.38768	6.44357	2.12755	3.00105	0	6.89334	0.999275	6.96909
AL391845.1	0	1.6767	0.34692	0.393543	0.489003	0	1.16663	0	0.499638	0
PRKCZ	736.266	771.282	455.102	439.756	316.468	327.389	390.004	316.128	502.269	300.139
AL590822.2	2.69366	4.19175	5.91594	8.94229	5.19023	5.00384	2.86574	3.44667	6.35589	5.05987
PRKCZ.AS1	36.8133	64.5529	62.0965	64.7464	78.4371	64.6879	50.6773	44.6637	81.052	57.6225
FAAP20	597.094	633.792	914.38	841.662	680.051	744.691	625.851	496.444	450.583	502.593
AL590822.1	0	0	1.04076	0.659045	0.978006	0.555285	2.37394	0	0	0
SKI	2386.58	2266.06	2219.67	2153.87	2339.39	3087.34	1452.73	3178.09	1108.75	2154.59
MORN1	140.07	135.813	268.502	297.702	205.242	154.526	176.531	116.615	199.958	103.372
AL589739.1	0	1.6767	7.44707	6.83712	3.01979	3.44402	4.05271	0.625053	2.28615	0.457599
AL513477.1	35.0175	32.6956	83.1466	136.315	50.6241	66.9153	60.6242	43.0922	32.067	26.5167
AL513477.2	0	0	4.97691	6.96516	3.10556	3.55633	6.38597	2.35726	14.9253	3.71335
RER1	822.463	819.906	899.126	801.253	788.823	809.154	1076.64	1161.47	792.159	1164.08
PEX10	547.71	528.999	472.305	417.689	392.289	355.284	374.041	197.407	279.807	295.08
PLCH2	0	0	1.38768	2.49872	0.978006	2.22114	0.593484	37.7349	2.71316	48.626
AL139246.1	0	0	0	0	0	0	0	0	0	0
AL139246.4	0	0	0	0.329523	0	0	0.593484	0.625053	0	0.928336
PANK4	223.574	266.595	297.889	248.432	270.854	274.362	350.054	236.927	531.208	255.279
HES5	0.897886	0	1.04076	0	0	0	0.573148	0	0	0.470737
AL139246.5	0	0	0	0	0	0	0	0	0	0
TNFRSF14.AS1	0	0	0	0	0	0	0	0	0	0
TNFRSF14	0	0.838349	7.40535	3.28581	1.50989	2.33345	1.16663	0	2.35585	0
AL139246.2	0	0	0	0	0	0	0	0	0	0
AL139246.3	0	0	0	0	0	0	0	0	0	0
FAM213B	353.767	339.532	166.137	146.317	87.3678	126.412	90.9159	92.0062	103.481	95.1742
MMEL1	6.2852	7.54515	2.53018	2.36126	0.489003	0	0	3.44667	1.49891	1.84354
AL831784.1	0.897886	0	0	0	0	0	0	0	0	0
TTC34	4.48943	0	0.448654	2.76422	0	1.22288	1.18697	0.625053	1.49891	0.928336
AC242022.1	0	0	0	0.787087	0.489003	0	0	1.25011	0	0
AL592464.2	0	0	0	0	0	0	0	0	0	0
AL592464.1	0	0	0	0	0	0	0	0	0	0
AL589702.1	0	0	0	0	0	0	0	0	0	0
ACTRT2	0	0	2.14153	0	3.63745	0	0.593484	0	1.71388	0
LINC00982	0	0	1.59115	0.329523	1.55278	0	6.95912	3.44667	2217.73	1.38594
PRDM16	15.2641	17.6053	31.1708	10.7085	27.8815	5.22219	96.9524	18.0191	1164.74	10.6693
MIR4251	0	0	0	0	0	0	0	0	0	0
AL008733.1	0	0	2.24327	0.329523	0	0	1.16663	0	3.21279	0
AL512383.1	0	0	0.448654	0	0.978006	0	0	0.785755	10.5709	0.470737
AL590438.1	0	0	1.04076	0.329523	0	0	0.573148	0.625053	20.1425	0
ARHGEF16	490.246	424.205	671.045	1101.22	397.41	311.691	490.867	308.396	191.888	261.933
AL512413.1	0.897886	1.6767	3.87614	20.0538	7.01758	9.45239	7.02013	14.4117	4.49967	16.1736
MEGF6	1007.43	899.549	2012.34	2370.71	1871.54	2462.63	1418.24	3153.91	880.034	2297.37
MIR551A	0	0	0	0	0	0.555285	0	2.66091	0	0
AL513320.1	4.48943	0.838349	4.9169	11.0475	0	1.22288	0.573148	2.98232	2.71316	2.31427
TPRG1L	276.549	295.937	449.619	502.439	402.858	432.968	585.303	521.179	478.144	608.334
WRAP73	360.052	395.701	441.762	410.208	327.337	334.14	309.385	346.184	241.03	293.98
TP73	120.317	117.369	136.872	97.2223	71.3337	31.5703	63.9817	26.1625	45.781	23.1821
AL136528.1	0	0.838349	0	0	0	0	0	0	0.714605	0
AL136528.2	2.69366	0	0	0	0	0	0.573148	0.625053	0.357303	0
TP73.AS1	928.414	1039.55	944.896	910.282	915.02	1097.67	751.351	731.175	888.778	798.724
TP73.AS1.1	0	0	0	0	0	0	0	0	0	0
CCDC27	18.8556	22.6354	11.9753	5.92199	6.70012	5.55912	20.3855	8.9292	68.195	8.32875
SMIM1	6.2852	4.19175	19.399	15.7154	10.655	11.3366	21.04	4.53607	41.781	7.85802
LRRC47	1901.72	1938.26	978.25	976.442	942.386	818.837	972.442	734.336	1194.98	921.98
RN7SL574P	6.2852	0	3.22402	2.82824	1.02089	1.89048	0.593484	0.625053	4.2847	1.39907
AL365330.1	6.2852	10.8985	10.5042	11.2584	5.14734	9.22777	6.40631	7.21474	9.99861	14.814
CEP104	593.502	571.754	648.911	626.183	736.809	670.632	683.378	667.064	618.348	653.212
DFFB	209.207	159.286	116.362	125.247	116.167	122.956	93.1438	128.384	119.553	119.258
C1orf174	232.552	230.546	288.545	251.471	255.06	331.463	254.265	366.186	204.26	243.603
LINC01134	4.48943	13.4136	7.05843	13.7477	2.53079	2.44576	1.73978	2.19656	7.9245	7.43983
LINC01346	0	0	0	0	0	0	0.593484	0	0.357303	0.470737
LINC01345	0	0	0	0	0	0	0	0	0	0
AL805961.1	0	0	0	0	0	0	0	0	0	0
AL805961.2	0	0	0	0	0.489003	0	0	0	0.85694	1.85667
EEF1DP6	0	0	0.448654	0	0	0	0	0	0	0
LINC01777	0	0	0	0	0	0	0	0	1.07191	0
AL355602.1	0	0	0	0	0	0	0	0	0	0.470737
Z98747.1	0	0	0	0	0	0	0	0	0	0
LINC01646	0	0	0	0	0.531889	0	0	0	1.42921	0
AJAP1	62.852	55.3311	22.9048	84.9509	8.9736	9.00314	18.0726	39.967	4.3544	54.785
BX005132.2	0	0	0	0	0	0	0	0	0	0
BX005132.1	0	0	0	0	0	0	0	0	0	0
AL691497.1	0.897886	0	0	0	0	0	0	0	0	0
AL139823.1	0	0	0	1.83968	0	0	0	0	0.499638	0
Z98259.3	0	0	0.34692	0	0	0	0	0	0.714605	0
Z98259.2	0	0	0	0	0	0	0	0	0	0
Z98259.1	0	0	0	0	0	0	0	0	0	0.470737
Z97988.1	0	0	0	0	0	0	0	0	0	0
AL365255.1	0	0	0.448654	0	1.06378	0	0	0	0	0
MIR4417	2.69366	0	0	0	0	0	0	0	0	0
MIR4689	0	0	0.795574	0.393543	0	0.667597	0	0	0	0
NPHP4	376.214	312.704	909.589	1061.39	495.922	660.948	371.298	500.087	209.033	303.971
KCNAB2	178.679	217.133	329.37	377.988	192.691	243.235	141.695	132.241	172.184	95.461
CHD5	91.5843	99.7636	31.4943	29.1335	50.7444	25.4622	21.6539	61.1291	5.71391	112.145
RPL22	1262.43	1461.24	2207.32	2079.64	1588.58	1447.87	1286.28	1272.64	1918.74	1423.98
AL031847.1	0	0.838349	0	0.787087	0.531889	1.22288	4.66653	0.625053	7.92743	1.38594
RNF207	79.9118	81.3199	89.086	154.037	345.765	235.673	633.895	201.8	2798.04	615.553
ICMT	2776.26	2750.62	1738.53	1686.1	1514.1	1934.9	1902.08	1884.4	1263.97	1727.03
LINC00337	94.278	73.7748	37.8875	32.9409	27.2639	13.7886	9.35339	10.5007	6.71319	49.6726
HES3	129.296	78.8049	4.77344	4.73194	4.52968	9.22777	0	9.0899	0	48.3129
GPR153	323.239	341.208	365.288	278.908	128.735	291.582	156.268	209.943	523.992	288.907
ACOT7	2840.91	2659.24	775.622	690.779	657.832	1070.14	1117.55	1176.37	145.979	1147.11
AL031848.2	0	0	0	0	0	0	0	0	0	0
HES2	17.9577	16.767	3.08056	0.329523	5.14734	6.782	16.3328	14.8761	39.274	14.4615
ESPN	201.126	162.64	52.4845	62.807	60.5501	22.4611	38.007	15.9655	15.9246	37.983
MIR4252	0	0	0.34692	0	0	0	0	0	0	0
AL031848.1	1.79577	0	0	0.329523	0	0	0	0	0	0.457599
TNFRSF25	197.535	172.7	271.046	264.806	245.692	122.719	223.359	236.588	167.318	150.717
PLEKHG5	1192.39	1132.61	1189.35	1063.95	1027.75	648.202	824.951	713.263	687.586	638.067
NOL9	630.316	730.202	590.462	578.338	650.84	588.717	567.881	689.815	444.657	551.182
RNU6.731P	0.897886	0	1.69288	1.11661	0	0	0.573148	0	3.21279	0.928336
AL591866.1	3.59154	7.54515	8.11749	11.1115	3.14845	14.3439	7.51193	6.42899	5.14164	7.89743
TAS1R1	3.59154	10.8985	3.52922	4.13691	6.21112	1.89048	4.68686	2.82162	4.92667	3.22947
ZBTB48	369.031	335.34	321.756	351.22	314.066	340.379	284.825	242.231	241.527	250.598
KLHL21	900.579	1117.52	802.283	842.033	1125.42	1500.88	1212.03	1113.58	2027.55	1421.62
PHF13	699.453	732.717	1019.75	789.526	1027.94	1040.47	725.258	662.938	484.564	650.37
THAP3	102.359	100.602	165.873	125.612	150.157	116.723	142.797	85.381	138.827	88.1263
DNAJC11	1532.69	1497.29	818.163	841.248	698.479	701.104	893.973	847.683	814.637	916.305
LINC01672	0	0	0	0	0.531889	0	0	0.785755	0.357303	0.941474
AL591163.1	0	0	0.34692	0	1.50989	0.667597	0.593484	0	0	0
CAMTA1.DT	5.38731	2.51505	4.22306	1.71163	2.08467	3.89327	0.573148	2.19656	2.14382	2.78501
CAMTA1	355.563	425.882	643.225	727.265	580.871	944.545	626.733	766.392	615.333	554.125
AL590128.1	0	0	1.14249	1.83968	0.978006	0.555285	0	0.625053	2.71316	0.915199
AL512330.1	0	0	0	0	0	0	0.593484	0.625053	0	0
RNU1.8P	0	0	0	0	0	0	0.573148	0	0.357303	0
CAMTA1.IT1	0	0.838349	0.34692	0.787087	0	0	0.593484	2.19656	0.85694	0.470737
Z97987.1	0	0	0.693841	0	0	0	0	0	0.714605	0
AL365194.1	0	1.6767	1.34596	0	0.531889	0	0.593484	0	0	0.457599
AL359881.3	0.897886	2.51505	11.078	3.80739	1.9989	8.56017	7.63395	2.98232	3.28543	5.08614
AL359881.2	4.48943	0	2.28499	3.02031	0.489003	3.00105	2.90641	0.785755	1.07191	2.30113
AL359881.1	0	0	10.2825	6.50759	9.54837	6.66969	1.73978	7.85755	4.35733	8.35503
VAMP3	492.939	601.097	567.08	589.182	828.776	988.874	1156.46	1465.98	1416.3	1496.51
Z98884.2	5.38731	5.86845	7.60882	7.0386	6.65724	9.22149	8.71923	10.6614	20.9239	16.7757
PER3	430.087	596.066	251.464	248.241	282.118	439.626	112.407	225.123	933.162	251.697
Z98884.1	4.48943	5.0301	3.32575	2.95628	4.21222	2.44576	0	5.17888	17.3567	5.57002
UTS2	0	0.838349	1.48941	0	2.4879	0	3.47956	0.785755	0	0
TNFRSF9	0	0	0	0.723066	4.12645	10.6753	18.1133	10.6437	7.21283	14.3695
AL009183.1	0	0	0	0	0	0	0	0	0	0
PARK7	625.826	617.025	1285.83	958.754	840.7	946.891	1377.93	945.439	707.964	744.327
Y_RNA	2.69366	1.6767	2.97883	4.53046	2.53079	1.66585	2.3536	0.625053	1.57155	1.3728
AL034417.4	2.69366	4.19175	9.64862	8.54875	12.3365	3.78096	12.1988	9.71495	5.35661	11.6108
AL034417.3	0	0	0.34692	0.787087	1.46701	1.66585	1.16663	0.785755	0.85694	1.38594
ERRFI1	802.71	747.808	1176.64	421.203	3416.09	779.767	2643.41	3290.35	826.417	2358.66
AL034417.2	2.69366	2.51505	5.2221	0.723066	7.7639	3.00105	5.28035	4.23242	6.64056	4.17095
AL034417.1	0	0	0.448654	0	0	0	0	0.785755	0.357303	0
AL358876.1	0	0	0	0	0	0	0	0	0	0
LINC01714	0	0	0	0	0	0	0	0	0.499638	0
RNU1.7P	0	0	0	0	0	0	0	0	0	0
AL358876.2	0	0	0	0	0	0	0	0	0.999275	0
RNU6.991P	0	0	0	0	0	0	0	0	0	0
SLC45A1	59.2605	46.9476	8.20093	8.81425	20.9068	17.7879	5.21934	36.5026	12.5694	53.3728
Y_RNA.1	0	0	0	0	0	0	0.593484	0	0	0.470737
RERE	2713.41	2562	2427.17	3090.17	4168.22	3412.76	3449.76	4402.75	1973.03	2952.42
AL096855.1	2.69366	0	3.38576	1.96772	3.55168	1.66585	5.30068	5.48253	2.71316	4.13153
SNORA77	0.897886	0	0.795574	0.723066	0	0	0	1.25011	0.85694	0.457599
AL096855.2	2.69366	0.838349	0	0.723066	1.02089	1.22288	0.593484	0	1.71388	0.470737
RPL7P11	0.897886	0.838349	3.4692	4.85998	5.19023	6.66969	2.86574	4.07172	10.9979	4.58913
RPL7P7	0.897886	2.51505	4.36651	4.79596	6.65724	4.33624	8.16642	5.48253	12.4968	7.41355
Y_RNA.2	0	0.838349	0.34692	1.44613	0.489003	4.33624	3.49989	4.85748	1.57155	2.77187
AL357552.1	1.79577	1.6767	2.48846	3.15777	2.57367	1.33519	1.76012	2.98232	4.2847	3.22947
AL357552.2	0	2.51505	3.97787	5.39098	5.59346	7.33729	5.89417	7.51839	10.4983	8.81263
RPL23AP19	0	0	0	0	0	0	0	0	0.357303	0
ENO1	28855.4	36026.4	20370.9	16296.2	17888.4	18490.1	36029.7	20392.1	31359.3	18961.5
MIR6728	0	0	0	0.393543	1.06378	1.11057	0.573148	1.41081	1.21424	0.470737
ENO1.IT1	2.69366	1.6767	3.97787	5.71109	6.35704	8.44786	8.14608	11.8938	22.998	6.05389
ENO1.AS1	0	0.838349	1.24423	1.11661	0.489003	3.66864	1.16663	0	1.07191	0
RNU6.304P	0	0	0	0.723066	0	0	0	0	0	0
HMGN2P17	0	0	4.12132	3.55131	2.44501	2.77642	4.66653	2.82162	0.85694	2.30113
AL139415.1	0	0	0	0	0.531889	0	0	0	0	0
AL139415.2	0	0	0	0	0	0	0	0	0	0
CA6	0	0	0	0	0	0	0	0	0.999275	0.470737
RN7SL451P	0	0	0	0	0	0	0	0	0	0
SLC2A7	0.897886	0	0	0	0.531889	0	0	0	0.714605	0
SLC2A5	0.897886	1.6767	0.34692	0	0	0	1.76012	1.41081	3.9274	4.62854
SCARNA16	0	0	0	0	0	0	0	0	0	0.457599
GPR157	42.2006	65.3913	90.2519	58.2106	248.463	101.718	532.171	78.809	313.942	77.0388
MIR34AHG	281.936	415.821	173.584	120.294	178.416	228.991	146.727	280.001	248.891	205.333
MIR34A	0	0	0	0	0	0	0	0	0	0
LINC01759	11.6725	18.4437	12.5674	10.6445	12.9112	27.1217	16.3939	31.4844	32.2123	22.2669
Z98044.1	5.38731	1.6767	1.7346	3.55131	5.99669	12.5658	3.45922	7.83979	11.6399	10.238
H6PD	361.848	254.02	1173.37	703.718	1117.04	951.757	1313.39	851.022	1367.55	1138.53
SPSB1	84.4012	89.7034	417.035	391.135	313.036	1395.82	333.266	2187.99	154.621	1925.9
BX323043.1	0	0	0	0.393543	0.489003	1.11057	0.593484	3.44667	0.714605	7.45297
AL928921.2	0	1.6767	0.693841	1.44613	1.95601	4.6669	2.3536	8.9292	6.99786	16.2393
RNA5SP40	0	0	0	0	0	0	0	0	0	0
AL928921.1	0	0	0	0	0	0	0	0	0.357303	0
SLC25A33	237.94	258.212	198.719	165.584	211.531	240.234	183.816	198.549	115.135	190.27
AL954705.1	20.6514	4.19175	8.15921	3.68877	7.14624	16.0035	3.47956	4.85748	7.7851	6.91654
TMEM201	777.569	800.624	769.862	804.034	767.916	865.319	727.754	545.074	693.643	542.017
PIK3CD	689.576	693.315	382.7	519.572	377.309	670.108	276.756	640.169	211.037	382.514
PIK3CD.AS1	0	0	0	0	0.489003	0	0	0	0	0
AL691449.1	0	0	0.34692	0	0.531889	0	0	0	0	0
PIK3CD.AS2	47.5879	44.4325	55.1449	72.5721	26.3716	49.0213	29.1861	22.4122	37.8477	13.4018
CLSTN1	3241.37	3345.01	3910.85	4408.85	3794.54	4509.77	3010.93	4795.52	2009.08	4381.1
MZT1P1	0	0	0	0	0.531889	0	0	0	0.357303	0
AL357140.3	0	0.838349	0.34692	0.329523	0	2.33345	0	0	0.357303	0
CTNNBIP1	988.572	899.549	1283.71	1234.01	1226.85	1287.27	1527.61	714.996	976.07	631.164
AL357140.1	0	0	0	0	0	0	0	0	0	0
LZIC	253.204	293.422	399.506	311.169	489.024	408.405	780.066	391.865	828.61	436.817
AL357140.2	4.48943	1.6767	5.07864	3.94485	3.06267	2.44576	7.02013	1.57151	2.28615	5.11242
NMNAT1	67.3414	64.5529	73.7118	77.9631	83.859	101.381	175.344	95.6313	185.053	92.8862
RN7SKP269	0.897886	0	1.48941	3.88083	2.57367	3.00105	3.47956	1.57151	5.14164	2.34055
AL357140.4	0.897886	2.51505	1.69288	3.61533	2.04178	2.88874	2.33326	0	8.1424	0.941474
MIR5697	0	0	0.448654	0.393543	0.531889	0.667597	0.573148	0	1.21424	0.915199
AL603962.1	0	0	0	0	0	0	0	0	0	0
RBP7	17.9577	11.7369	17.3826	8.48473	10.8266	11.2243	23.8448	2.03586	6.42852	7.38728
UBE4B	3124.64	3059.14	2713.11	2708.99	2468.24	2368.91	2656.2	2142.34	2540.05	2399.8
AL590639.1	0	0	0.448654	0.393543	0	0.667597	1.76012	0	0	0.941474
PGAM1P11	0.897886	0	2.59019	4.3384	1.06378	1.33519	2.90641	1.57151	0.357303	0.470737
RNU6.828P	0	0.838349	1.83634	3.28581	0	1.89048	1.76012	0	3.14309	0.457599
KIF1B	5458.25	5234.65	4327.34	4057.04	4095.98	5272.1	5730.54	5949.73	4589.74	5159.35
MIR1273D	0	0	0	0	0.978006	0	0	0	0	0.457599
RNU6.37P	0	0	1.48941	1.05259	1.50989	0.555285	4.66653	0	1.21424	3.68707
RN7SL731P	0	0	0	0	0	0	0	0	0	0
AL139424.3	8.08097	6.7068	29.7231	44.4083	28.4992	42.0209	37.8443	47.3069	17.4961	31.4321
AL139424.2	3.59154	10.8985	8.60786	20.6206	11.1011	23.6777	21.5318	36.3418	7.71246	13.9776
PGD	6156.8	6020.19	4533.45	4794.8	3223.13	5067.94	3040.57	4573.12	2462.95	3534.38
AL139424.1	1.79577	0	1.59115	0.329523	0.531889	0.555285	0	0.625053	0	0.941474
CENPS.CORT	2.69366	2.51505	5.2221	4.13691	5.06157	9.77677	2.31293	2.66091	1.78651	3.25575
CENPS	5.38731	5.0301	14.3621	15.2578	14.3354	17.1141	15.1662	10.0186	9.42634	6.47208
CORT	7.18308	15.9286	7.60882	8.62219	9.18802	8.89083	6.99979	7.35769	14.783	6.98223
DFFA	3068.08	2686.07	2455.8	1684.34	2228.1	1870.22	1819.58	1524.43	2199.81	1850.24
AL354956.1	0	0	0	0	0	0	0	0	0	0
PEX14	271.161	297.614	341.705	342.571	323.726	337.827	352.689	286.466	224.884	243.969
RN7SL614P	2.69366	1.6767	3.52922	1.51015	0.489003	1.89048	0	1.41081	2.92812	1.38594
CASZ1	123.01	108.147	99.0501	153.501	292.232	159.761	871.213	108.9	1361.87	359.435
AL139423.1	8.08097	24.3121	12.2205	12.1001	20.1176	9.78305	31.8688	17.8762	47.8463	16.6706
HSPE1P24	0	0	0	0	0	0	0	0	0	0.470737
C1orf127	19.7535	9.22184	4.77344	24.0909	1.02089	0.667597	0.573148	0.625053	6.99786	5.05987
CFL1P6	0.897886	0	0.795574	1.44613	1.95601	0	0.593484	0	1.71388	1.39907
TARDBP	1960.08	2431.21	2699.62	2386.24	2367.47	2701.14	2185	2378.07	1998.98	2562.29
AL109811.4	0	0	0	0.723066	0.531889	0.555285	0	0	0.499638	0
MASP2	42.2006	73.7748	86.1255	135.05	214.748	166.742	141.858	111.115	146.412	86.6747
AL109811.3	12.5704	32.6956	43.3262	54.9719	62.8235	46.9062	43.023	31.3414	49.2785	35.2768
SRM	3694.8	3627.54	1671.52	1402.9	1225.99	1620.64	1523.04	2005.21	691.505	2015.64
EXOSC10	1933.15	1885.45	1504.17	1383.66	1185.34	1431.84	1187.28	1398.13	750.308	1094.91
AL109811.1	0	5.0301	3.63095	4.20094	3.50879	6.11441	3.47956	2.98232	9.78365	4.15781
AL109811.2	0.897886	1.6767	5.12036	4.6039	1.9989	0.555285	4.68686	1.41081	0.714605	3.73962
MTOR	6601.26	6603.68	3647.43	3290.71	3491.44	3327	3514.56	3410.27	2559.62	3056.28
MTOR.AS1	0.897886	0	0.693841	1.05259	0.489003	2.44576	2.29259	4.55383	3.07046	2.78501
RNU6.537P	0	0	0	0.393543	0	0	1.16663	0.625053	0	0
ANGPTL7	1.79577	0	8.24265	5.31754	5.55057	27.9017	15.1662	8.1612	4.642	12.0552
RNU6.291P	0	0	0.693841	0.329523	0.978006	0	0.593484	0	0.999275	0.457599
RPL39P6	0	0	0	0	0	0	0	0	0	0
UBIAD1	975.104	945.658	431.637	372.07	394.33	403.513	416.223	285.323	331.084	383.035
UBE2V2P3	0.897886	5.0301	0.795574	2.4347	2.53079	3.78096	0	1.25011	0.499638	2.77187
AL031291.1	0	0	0	0.659045	1.46701	0	0	0	0	0
MTCYBP45	0	0	0	0	0.489003	0	0	0	0.499638	0.915199
DISP3	214.595	186.114	765.715	97.2655	68.6743	41.135	43.4538	33.8239	3.21279	55.3477
LINC01647	0	1.6767	0.34692	0.393543	0.531889	0	0.573148	0	1.42921	0
AL031731.1	9.87674	20.1204	5.01863	6.37013	9.23091	1.77817	4.64619	5.48253	11.4975	5.55688
FBXO2	604.277	737.748	730.834	508.807	355.219	298.258	501.96	287.216	375.421	369.11
FBXO44	549.506	534.867	458.644	531.024	383.718	398.609	442.137	416.779	515.344	322.052
FBXO6	44.8943	65.3913	46.2867	56.2259	52.8719	30.0105	66.437	23.2157	55.1289	32.8311
MAD2L2	4890.78	4744.22	1098.42	1262.79	921.222	653.954	628.099	677.689	340.508	1134.7
DRAXIN	1039.75	897.872	800.907	803.857	272.741	221.772	133.528	336.612	13.4961	365.802
AGTRAP	1113.38	1156.92	956.574	891.414	576.701	567.891	624.355	401.313	295.302	493.533
C1orf167	37.7112	52.816	30.657	60.5718	19.1396	6.22672	1.1463	5.96464	0.357303	12.5522
AL953897.1	5.38731	3.3534	1.79461	3.94485	0	0	0	0	0	0.457599
MTHFR	618.643	531.514	441.88	499.366	370.507	426.43	882.713	510.41	2072.91	543.703
CLCN6	588.115	581.815	610.129	687.031	677.623	757.774	1006.16	873.507	772.859	699.69
NPPA.AS1	4.48943	3.3534	4.77344	4.40242	1.50989	7.22498	5.83316	23.5016	1.21424	7.41355
NPPA.AS1_1	0	0	0	0	0	0	0	0	0	0
NPPA.AS1_2	0	0	0	0	0	0	0	0	0	0
NPPA	0	4.19175	36.0826	6.63564	69.6952	6.55738	3172.19	17.5547	2684.61	104.326
NPPA.AS1_3	0	0	0	0	0	0	0	0	0	0
NPPB	2.69366	0.838349	181.086	125.514	976.839	2516.23	5190.35	698.119	285.443	246.178
AL021155.1	0	0	0	0.393543	0	0.555285	0	0	0	0.457599
RNU5E.1	0	0	0	0	0.489003	0.555285	0.573148	2.03586	1.07191	0
RNU5E.4P	0	0	0	0	0	0	0.573148	0.625053	0	0.470737
KIAA2013	1652.11	1666.64	1376.15	1143.97	1171.74	947.658	1194.96	1179.94	1147.12	1330.73
PLOD1	1661.99	1635.62	2750.96	1716.81	2061.56	2386.26	2751.84	4779.88	3506.26	5726.36
MFN2	2570.65	2651.7	1782.7	1628.44	1970.22	2414.05	3741.14	2408.86	6042.34	2708.06
AL096840.1	0	0	0.448654	0	0	0	0	0	0	0
MIIP	765.896	867.692	789.59	661.118	501.258	496.77	397.513	447.746	158.97	316.931
Y_RNA.3	0	5.86845	5.46729	6.31553	3.46591	3.55633	5.26001	4.23242	4.21207	2.34055
MIR6729	0	0	0	0	0	0	0	0	0	0
RN7SL649P	0	0	0	0	0.531889	1.22288	0.593484	0	0	0
TNFRSF8	590.809	491.273	96.1862	96.3542	9.05937	24.1144	4.05271	54.3965	1.35658	19.9789
RNU6.777P	0	0	0	0	0	0	0	0	0	0
RPL23AP89	0	0	0	0	0	0	0	0	0	0
MIR7846	0	0	0	0	0	0	0	0	0	0
TNFRSF1B	31.426	38.5641	90.2856	28.3182	43.8298	36.0126	26.8529	33.5557	24.8513	15.8211
MIR4632	0	0	0	0	0	0	0	0	0	0
RPL10P17	0	0	0	0	0	0	0	0	0	0
SNORA70	0	0	0	0	0	0	0	0	0	0
VPS13D	2047.18	2034.67	1499	1390.66	1715.56	1933.47	2199.49	2482.58	4222.62	2504.44
SNORA59A	5.38731	4.19175	2.48846	2.10518	4.04068	7.4496	4.07304	3.60737	37.0693	12.9573
AC243836.1	0	0	0	0	0.489003	0	0	0.625053	0	0
DHRS3	459.717	456.9	209.471	213.783	426.39	375.911	692.898	368.614	887.489	968.421
RNU6ATAC18P	0	0.838349	0.448654	0.329523	0	2.44576	6.40631	1.25011	2.64345	3.75276
MIR6730	1.79577	0	0	0.393543	0	0	0	1.25011	2.07118	0
AC254633.1	7.18308	3.3534	1.48941	1.9037	3.55168	3.33171	10.337	4.07172	24.279	11.5714
AADACL4	0	0	0	0.723066	0	0	0	0	0.357303	1.41221
AC244670.1	0	0	0	0	0	0	0	0	0	0
AADACL3	74.5245	19.282	0.795574	23.7877	24.9475	42.2456	36.7997	230.498	0	179.979
C1orf158	0	0.838349	0.34692	69.8851	1.02089	3.44402	0.593484	8.46485	0.357303	3.68707
PRAMEF12	8.08097	1.6767	0	0	0	0.555285	0	0	0	3.70021
PRAMEF1	0	0	0	0	0	0	0	0	0	0.470737
LINC01784	0	0	0	0	0	0	0	0	0	0
PRAMEF11	0	0	0	0	0	0	0	0	0	0
PRAMEF30P	0	0	0	0	0	0.667597	0	0	0.499638	0
HNRNPCL1	0	0	0.34692	0	0	0	0	0	0	0
PRAMEF2	0	0	0	0	0	0	0	0	0	1.38594
PRAMEF4	0	0	0	0	0	0	0	0	0	0.470737
PRAMEF10	0	0	0	0	0.489003	0	0	0	0	0
PRAMEF7	0	0	0	0	0	0	0	0	0	0
RNU6.1072P	0	0	0	0	0	0	0	0	0	0
PRAMEF29P	0	0	0	0	0	0	0	0	0	0
PRAMEF6	0	0	0	0	0	0	0	0	0	0
PRAMEF28P	0	0	0	0	0	0	0	0	0	0
PRAMEF27	0	0	0	0	0	0	0	0	0	0
HNRNPCL3	0	0	0	0	0	0	0	0	0	0
PRAMEF25	0	0	0	0	0	0	0	0	0	0.457599
PRAMEF34P	0.897886	0	0	0	0	0	0	0	0	0
PRAMEF35P	0	0	0.693841	0	0	0	0	0	0	0
HNRNPCL2	0	0	0	0	0	0	0	0	0	0
PRAMEF36P	0	0	0	0	0	0	0	0	0	0
AC245056.1	0	0	0	0	0	0	0	0	0	0
PRAMEF26	0	0	0	0	0	0	0	0	0	0
HNRNPCL4	0	0	0	0	0	0	0	0	0	0
PRAMEF9	0	0	0	0	0	0	0	0	0	0
PRAMEF13	0	1.6767	0	0	0	0	0	0	0	0
PRAMEF18	0	0	0	0	0	0	0	0	0	0
PRAMEF31P	0	0	0	0	0	0	0	0	0	0
PRAMEF5	0	0	0	0	0	0	0	0	0	0
PRAMEF32P	0	0	0	0	0	0	0	0	0	0
RNU6.771P	0	0	0	0	0	0	0	0	0	0
PRAMEF8	0	0	0	0	0	0	0	0	0	0
PRAMEF33	0	0	0	0	0	0	0	0	0	0
PRAMEF15	0.897886	0	0	0	0	0	0	0	0	0
AC243961.1	0	0	0	0	0	0	0	0	0	0
PRAMEF14	0	0	0	0	0	0	0	0	0.357303	0.457599
PRAMEF19	0	0	0	0	0	0	0	0	0	0
PRAMEF17	0	0	0	0	0	0	0	0	0.714605	0
PRAMEF20	0.897886	0	0	0	0	0	0	0	0.357303	0
LRRC38	0.897886	1.6767	3.73268	1.05259	0.531889	0.555285	0	1.57151	0	0.928336
AL354712.1	0	0	0	0	0	0	0	0	0	0.457599
BRWD1P1	0	0	0	0	0	0	0	0	0	0
PDPN	1294.75	1251.66	302.762	339.143	273.77	561.128	182.958	697.279	300.464	696.265
RNA5SP41	0	4.19175	0.448654	0.787087	0.489003	0	0	0	0.357303	0
AL359771.1	0	0	0.448654	0.787087	0	0.555285	0	0	1.07191	0
SCARNA11	0	1.6767	0	0	0.489003	0.555285	0	0	0	0.457599
PRDM2	648.273	706.729	871.158	909.137	987.657	1246.57	1003.43	1411.83	919.928	1125.58
KAZN	273.855	247.313	971.741	310.843	744.728	567.386	337.791	847.2	334.5	535.477
RNU6.1265P	0	0	0	0	0	0	0	0	0	0
AL357873.1	0	0.838349	0	0	0	0	0	0	0	0
KAZN.AS1	0	0	0	0	0	0	1.76012	0	0	0
TBCAP2	0	0	2.63191	2.23322	3.63745	1.22288	0.573148	4.85748	0.714605	0.457599
TMEM51.AS1	5.38731	7.54515	13.5248	24.8497	15.9739	6.22672	56.3681	4.23242	219.743	8.78635
TMEM51	70.0351	81.3199	90.2468	120.085	77.9052	106.166	192.043	68.0047	233.756	48.718
C1orf195	0	0.838349	1.93807	2.10518	0.489003	0.555285	1.73978	0	6.28618	1.86981
AL035405.1	1.79577	0	0.34692	1.05259	0.531889	0	1.1463	0.625053	4.642	0
AL391094.1	0	1.6767	0	0	1.06378	0	0	1.87516	0.357303	0.470737
FHAD1	18.8556	25.9888	67.0968	512.341	15.1847	20.5644	15.6783	5.01818	30.7104	8.36817
AL031283.2	0	0	0	0.787087	0	0	0	0	0	0
AL031283.3	0	0	0.897307	6.76368	0	0	0	0.785755	3.07046	0.457599
AL031283.1	0	1.6767	1.79461	20.2553	0.978006	0	0.593484	0.785755	2.35585	0.457599
EFHD2	290.915	347.077	498.744	563.864	246.241	396.619	216.583	282.698	317.437	207.829
CTRC	0	0	0	0	1.50989	0	0.573148	0	1.92885	0.928336
CELA2A	0	0	0	1.18063	1.02089	0	0.573148	0.785755	9.06904	0.928336
CELA2B	6.2852	0.838349	5.12036	3.74337	4.61545	3.00105	3.47956	2.35726	8.857	1.86981
CASP9	271.161	323.603	229.926	284.762	189.611	219.875	299.129	200.585	638.752	193.536
DNAJC16	734.47	727.687	712.635	651.434	702.065	647.06	764.7	714.138	855.599	680.825
SCARNA21B	0	2.51505	0	0.723066	0.531889	1.22288	0.593484	0	2.92812	0
AL121992.3	0	0.838349	0.34692	0	0	0	0	1.25011	0.499638	0
AGMAT	64.6478	65.3913	22.2161	23.88	15.7166	7.11266	9.33305	9.2506	2.92812	13.9513
AL121992.1	6.2852	5.0301	4.46824	7.16664	1.50989	5.11615	0.573148	2.19656	0.714605	0.470737
CHCHD2P6	1.79577	1.6767	1.83634	1.38211	1.95601	0.667597	1.73978	0.785755	3.42776	1.88295
RNU7.179P	0	0	0	0.393543	0	0	0	0	0.499638	0
CD24P1	0	0	0	0	0.489003	0	0	0	0	0
DDI2	1887.36	1864.49	1434.75	1240.18	1511.35	1636.5	1459.16	1677.44	1565.47	1278.24
RSC1A1	0	0	0	0	0	0	0	0	0	0
AL121992.2	0	0	0.693841	0	1.50989	1.11057	0	0	0	1.38594
PLEKHM2	2066.93	2036.35	2078.51	1697.76	2172.51	1691.39	1839.67	1540.07	1837.96	1649.65
AL450998.2	10.7746	14.2519	24.5011	19.9709	22.2452	22.4486	23.292	30.5557	34.4258	28.831
SLC25A34	1.79577	8.38349	12.5674	10.5805	33.964	27.677	50.1448	48.7355	25.0662	35.198
SLC25A34.AS1	0	0	0	0	0	0	0	0	0	0.457599
TMEM82	4.48943	21.7971	8.89477	1.77565	7.10335	2.00279	3.49989	0.625053	0	0
FBLIM1	2077.71	1883.77	1256.56	1079.62	1039.4	1399.06	1781.98	2340.7	1932	2856.24
RPL12P14	0	0.838349	1.24423	1.05259	2.08467	0	0	0.625053	0.357303	0.470737
UQCRHL	8.08097	5.0301	13.1178	8.74081	22.9486	5.44681	17.5401	6.42899	28.3546	5.12556
AL450998.1	1.79577	5.86845	16.6053	17.0881	13.2287	6.44507	10.4793	5.96464	6.71319	5.11242
FLJ37453	44.8943	33.534	67.1151	47.5849	48.1534	25.7928	47.2587	18.6619	97.485	42.2065
SPEN	2862.46	2668.47	3675.73	3586.07	4207.15	3201.23	2160.65	3370.37	1340.4	2631.47
AL034555.1	0	0	0	0	0.531889	0	0	1.25011	0	0
ZBTB17	416.619	425.882	389.828	351.934	307.151	358.866	345.591	331.862	251.028	277.531
AL355994.4	0	0	0.795574	0.329523	2.57367	0.555285	3.43889	2.82162	0	1.85667
AL355994.1	0	0	0	0	0	0	0	0	0	0
AL355994.5	0	0	0	0	0	0	0	0	0	0
TBC1D3P6	0	0	0	0	0	0	0	0	0	0
SRARP	0.897886	0	1.79461	0.659045	5.55057	0.667597	4.05271	0	0	1.38594
AL355994.3	0	0	0	0	0	0	0	0	0	0
HSPB7	8.08097	6.7068	5.2221	1.44613	562.383	5.22846	7234.42	21.0014	29050.1	2473.29
CLCNKA	27.8345	18.4437	21.337	19.3213	147.129	6.0021	90.6312	4.85748	84.3433	13.4674
AL355994.2	0	4.19175	3.42748	3.02031	5.10446	2.88874	3.47956	0.785755	5.49894	0.941474
CLCNKB	49.3837	67.9063	43.6131	31.4308	191.096	55.4726	80.6399	20.0727	197.465	16.2525
FAM131C	7.18308	5.86845	18.2982	13.8023	21.5245	11.5612	16.906	1.25011	53.4238	11.0743
EPHA2	1658.39	1499.81	3111.72	2232.11	1896.95	4719.78	2145.63	4996.07	873.4	2693.55
AL451042.2	0	2.51505	4.52826	2.95628	3.06267	10.12	7.51193	2.03586	11.6428	2.77187
AL451042.1	1.79577	1.6767	1.59115	4.47586	1.9989	8.22323	8.24777	6.12534	8.99934	4.68109
ARHGEF19.AS1	0	0	0	0	0	0	0	0	0	0
ARHGEF19	1163.66	1299.44	548.456	544.158	445.194	161.626	286.971	142.224	119.545	288.894
ANO7L1	2.69366	2.51505	5.12036	6.96516	8.16713	4.6669	2.90641	7.05404	27.1374	5.12556
RSG1	48.4858	41.9175	67.7307	62.0293	80.7963	44.9097	126.2	52.9679	122.548	45.8016
MT1XP1	3.59154	5.0301	0	0.723066	1.46701	0.555285	3.54057	3.60737	0.357303	0.470737
FBXO42	924.822	927.215	676.699	670.533	792.307	798.909	866.584	1036.09	930.586	931.121
SZRD1	1151.09	1201.35	1237.22	1170.72	1034.93	1383.71	1352.63	1376.29	1133.25	1350.5
AL358794.1	0	0	1.59115	0.723066	0.978006	0.667597	1.16663	2.82162	0.357303	0.470737
SPATA21	1.79577	0	1.48941	3.74337	2.57367	1.89048	1.16663	5.78618	4.85697	4.66796
NECAP2	289.119	320.25	616.04	621.511	576.16	695.975	559.983	757.945	295.305	634.706
LINC01772	27.8345	25.9888	49.8211	58.5307	47.0039	42.0084	29.6169	28.6805	66.1326	34.309
CROCCP3	98.7674	130.783	325.942	408.997	235.715	216.993	219.55	168.94	281.893	226.148
RNU1.1	0	0	0.448654	0	0	0	0	0	1.35658	0
AL137802.2	2.69366	3.3534	2.59019	1.38211	0.489003	1.77817	2.37394	0	0.85694	0.470737
AL137802.1	0	2.51505	0	0.329523	1.59567	0	0	0	0	0
LINC01783	12.5704	6.7068	3.97787	3.15777	20.5465	3.66864	16.3939	2.35726	5.57158	2.31427
RNU1.6P	0	0	0	0	0	0	0	0	0	0
FAM231B	0	0	0	0	0	0	0	0	1.21424	0
AL355149.1	0	0	0	0	0	0	0	0	0.357303	0
NBPF1	580.932	537.382	408.061	427.769	394.159	318.816	341.925	311.575	579.498	409.92
AL137798.1	1.79577	0	3.32575	0.659045	2.04178	1.22288	0.593484	1.41081	0.714605	0
CROCCP2	345.686	329.471	563.089	529.002	518.021	397.524	326.396	303.985	277.739	263.908
AL137798.3	0	0	0	0	0	0	0	0	0	0
MST1P2	11.6725	21.7971	93.8726	77.6147	53.4467	12.6718	23.8651	10.9651	17.5658	14.4089
AL137798.2	0	0	0.795574	0.723066	0	0	0	0.785755	0	0.457599
RNU1.3	0	0	0	0	0	0	0	0	0	0
FAM231A	0	0	0	0	0	0	0	0	0	0
AL021920.2	20.6514	14.2519	2.28499	1.83968	8.52748	1.22288	1.16663	2.03586	1.92885	3.24261
EIF1AXP1	3.59154	5.86845	2.28499	3.15777	3.01979	3.00105	2.33326	2.03586	1.07191	1.41221
ESPNP	27.8345	27.6655	19.279	12.3561	28.6278	9.00314	12.2191	4.85748	12.2818	7.38728
AL021920.1	0	0	0.34692	0	1.06378	0	0	0	0.357303	0
FAM231C	0	0	0.34692	0	0	0	0	0	0	0
AL021920.3	0	0.838349	0.448654	0	0	0.555285	0	0	0	0.470737
CROCC	1795.77	2010.36	1554.77	2295.54	1156.41	1058.32	410.983	811.59	214.677	745.712
CROCCP4	0	0.838349	0.693841	1.83968	1.55278	1.89048	0	0	1.42921	0
RNU1.4	0	0	0.448654	0	0	0	0	0	0	0
MST1L	40.4049	60.3612	131.672	95.2338	73.9074	7.78026	24.4789	8.46485	17.6414	6.96909
BX284668.1	0	0	0	0	0	0	0	0	0	0
BX284668.3	0	0	0	0	0	0.667597	0	0	0	0
MIR3675	0	0	0	0	0	0	0	0	0	0
BX284668.2	30.5281	25.9888	9.89381	7.68822	63.4067	5.88978	48.9375	2.19656	39.1375	2.77187
RNU1.5P	0	0	0	0	0	0	0	0	0	0
BX284668.5	6.2852	25.1505	19.7276	11.505	5.99669	3.11336	12.1581	5.80393	16.0001	6.96909
BX284668.4	6.2852	9.22184	5.81421	4.40242	2.4879	0.667597	2.33326	3.44667	2.07118	1.85667
RNU1.2	0	0	1.14249	0	0.489003	0.555285	0	0	0	0
BX284668.6	0	0	3.42748	3.94485	3.01979	1.33519	1.73978	0.625053	3.07046	2.81128
MFAP2	1446.49	1280.16	2134.75	2001.48	1220.75	1500.02	699.983	1109.31	733.849	1978.33
AL049569.1	4.48943	4.19175	3.12228	7.43214	2.57367	3.9993	1.78045	4.07172	2.21352	2.79815
ATP13A2	4097.95	4169.11	1903.15	2319.73	1648.47	2290.72	2075.36	2261.37	1063.32	2027.29
SDHB	583.626	629.6	613.721	517.207	651.449	581.611	1596.06	750.034	1619.31	708.281
PADI2	199.331	256.535	26.9661	67.987	96.0067	130.842	50.2668	186.53	81.8481	1037.59
AL590644.1	0	0	0	0	0	1.66585	0	0.785755	0.357303	1.88295
AL590644.3	0	0	0	0	0	0.555285	0	0	0	0
PADI1	3.59154	9.22184	4.9169	3.08433	15.3991	23.3408	5.87383	27.4304	27.7126	11.6239
PADI3	123.01	98.9252	16.6053	29.5365	33.2004	28.4632	1.16663	5.16113	0.999275	32.91
MIR3972	0	0	0	0	0	0	0	0	0	0
PADI4	1.79577	4.19175	0	1.9037	0	2.44576	0.593484	2.35726	0.714605	0
PADI6	0	0	0	0	0.531889	0	0.593484	0	0.499638	0.457599
AC004824.1	0	0	0	0	0	0	0	0	0	0
RCC2	7765.81	7638.2	4254.82	4213.88	3113.81	3286.8	1651.93	2880.72	907.64	3579.94
ARHGEF10L	1859.52	1676.7	1310.3	974.243	712.291	1017.12	880.278	1042.82	1011.3	900.379
AL136529.1	0	0	0	0	0	0	0	0	0	0
ACTL8	0	3.3534	0	0	0	0	0	1.57151	0	2.81128
AL357509.1	0	0	0	0	0	0	0	0	0	0
LINC01654	0	0	0	0	0	0	0	0	0	0
IGSF21	385.193	341.208	26.8461	75.7695	202.686	24.6823	33.3608	20.5548	0	30.0724
AL365209.1	12.5704	3.3534	0.693841	0.723066	3.14845	3.55633	4.07304	3.28597	0	3.25575
AL359738.1	0	1.6767	0	0	0	0	0	0	0	0
AL591896.1	0.897886	0.838349	0	0	1.06378	0	0	1.25011	5.21427	0.470737
KLHDC7A	518.978	309.351	88.3167	160.069	38.0904	82.0454	37.946	175.512	35.2769	66.2775
DYNLL1P3	0	0	0	0	0	0	0	0	0	0
AL031737.1	0	0	0	0.329523	0.489003	0	0	0	0.499638	0
PAX7	2.69366	1.6767	52.1661	32.0898	3.10556	6.22672	0	0	0	3.22947
TAS1R2	0	0.838349	0	0	0.489003	0	0	0	0	0
AL080251.1	2.69366	0	0	1.18063	0.531889	0	0.593484	0.625053	0.999275	1.41221
ALDH4A1	655.457	687.447	441.601	722.204	650.437	559.356	814.109	344.916	630.831	355.956
MIR4695	0	0	0	0	0	0	0	0	0	0
MIR1290	0	0	0	0	0	0	0	0	0	0
IFFO2	287.323	264.08	310.655	430.927	280.831	948.637	318.572	629.418	134.769	424.55
AL137127.1	7.18308	9.22184	13.9734	17.5551	12.6968	21.4503	8.14608	21.7694	17.2144	20.8941
UBR4	20376.6	20709.7	9044.17	10831	10521.3	12857.4	9370.51	15432.9	14739.7	12626
AL035413.1	3.59154	3.3534	1.48941	4.99744	5.55057	9.22149	2.92675	1.25011	7.42779	3.73962
EMC1	2531.14	2269.41	2672.51	2372.79	2600.74	3159.4	2633.35	3391.55	1370.65	3153.58
MRTO4	483.96	451.032	424.346	415.484	285.704	407.307	345.408	330.826	161.822	289.444
AKR7L	3.59154	6.7068	17.1974	23.9798	25.2906	15.7851	12.7719	14.251	7.28546	12.0946
AKR7A3	16.1619	8.38349	29.3762	46.5417	23.5407	26.6788	20.4466	19.4299	12.0669	10.1854
AL035413.2	32.3239	28.5039	79.2156	78.8971	66.0405	83.1371	52.9495	57.5217	76.5612	57.9225
AKR7A2	492.041	499.656	810.786	701.05	704.664	693.91	694.329	490.23	544.834	452.349
RNU6.1099P	3.59154	1.6767	5.77248	10.1323	3.06267	4.22393	6.36563	4.53607	2.42849	6.49836
PQLC2	407.64	342.885	340.002	328.961	302.519	309.164	388.817	365.328	225.895	367.608
CAPZB	3895.03	4340.14	2685.8	2619.98	2849.96	3714.66	3233.19	2987.78	1748.65	3197.68
RN7SL277P	0.897886	3.3534	0.34692	1.97714	0	0.555285	0.593484	0	0	0.470737
RNU4.28P	0	0	0	0	0	0	0	0	0	0
AL031727.2	0	0	0	0	0	0	0	0	0.357303	0
MINOS1	43.0985	68.7447	77.6896	111.143	65.6801	93.5006	186.519	119.24	142.488	92.2184
MINOS1.NBL1	0	0	0	1.11661	0	0.555285	0	0	0	0
AL031727.1	12.5704	9.22184	13.9734	9.4733	6.61435	4.89153	4.62585	4.85748	12.8541	8.8389
NBL1	26.0387	33.534	49.349	79.0609	23.3518	152.829	26.2797	165.44	6.71612	119.18
HTR6	15.2641	16.767	2.97883	4.53046	2.9769	3.00105	0	0.785755	0.357303	6.43267
TMCO4	241.531	192.82	79.3722	68.1716	36.9838	29.5612	44.2507	18.8049	39.8521	33.8383
RNF186	3.59154	0.838349	0	0	0	0	0	0	0.499638	0
AL391883.1	0	0	0	0	0	0	0	0	0	0.470737
OTUD3	509.999	584.33	880.447	882.577	866.72	1102.5	551.366	769.214	515.852	580.775
PLA2G2E	0	0	0	0	0	0	0	0.785755	0	0
RN7SL304P	0	0	0	0	0	0	0	0	1.21424	0
PLA2G2A	15.2641	4.19175	0	0	0.489003	0	7.0608	0	0.85694	4.18408
PLA2G5	0.897886	0.838349	0	0.988568	0	0	0	0	1.71388	1.41221
PLA2G2D	0	0	0	0	0	0.667597	0	0	0	0
PLA2G2F	0	0	0.795574	0.393543	0	0.555285	0	0	1.85622	0
Z98257.1	0	0	0.34692	0	0	0	0	0	0	0
PLA2G2C	0	0	0	0	0	0.667597	0	0	0.499638	0
UBXN10.AS1	0	0	0.795574	4.8694	1.06378	0	0.593484	0.625053	0.499638	0
UBXN10	21.5493	20.9587	42.1237	272.929	14.8244	33.4608	14.5727	7.05404	4.2847	6.98223
LINC01757	0	0	0	0	0	0	0	0	0	0
Z98257.2	0	0	0	0	0	0	0	0	0.357303	0
VWA5B1	29.6302	25.9888	39.3352	616.369	2.04178	4.89153	0	0.625053	1.07191	1.38594
AL020998.1	0	0	0	1.31809	0	0	0	0	0	0
LINC01141	0	0	0.448654	3.42327	0.531889	0	0	0	1.07191	0.457599
AL139254.1	0	0	0	0	0	0	0	0	0	0
AL139254.2	0	0	0	0	0	0	0.573148	0	0	0
AL139254.3	0	0	0	0	0	0	0	0	0	0
CAMK2N1	22.4471	45.2709	154.816	279.921	192.966	62.0237	249.005	108.454	82.92	57.0861
MUL1	713.819	622.894	487.77	465.579	542.128	539.746	795.643	526.786	802.803	611.879
RPS4XP4	0	0	0	0	0	0	0	0	0.85694	0
FAM43B	12.5704	9.22184	14.0986	12.0266	3.95491	16.0035	1.1463	12.3759	10.4256	10.6693
CDA	202.922	57.8461	112.99	185.22	10.6979	24.5637	3.54057	5.01818	0	50.9797
PINK1	538.731	331.986	242.037	210.642	238.709	319.047	495.981	255.714	550.609	504.347
MIR6084	0	0	0	0	0	0	0	0	0	0
PINK1.AS	47.5879	60.3612	67.6055	78.302	60.1641	66.0293	116.521	151.528	57.6329	193.578
DDOST	3852.83	3873.17	4857.3	4237.3	3720.75	3507.58	4767.19	4027.02	2612.9	4690.3
KIF17	636.601	776.312	419.387	392.096	238.031	235.872	64.1241	115.222	160.048	224.892
AL663074.2	4.48943	0	0.795574	0.329523	0.489003	0	0	1.57151	0.85694	0.928336
SH2D5	225.369	261.565	148.297	145.338	53.4467	145.854	44.8848	77.2198	29.8535	121.063
AL663074.1	0	0	0	0	0.489003	0.667597	0	0.785755	0.499638	0
HP1BP3	1836.18	1911.44	2827.82	2787.56	3764.73	3774.61	2453.02	3559.81	2187.64	3260.79
EIF4G3	2535.63	2479.84	2448.33	2608.86	2758.73	3224.76	2556.04	4066.06	1761.12	3409.63
RNU7.200P	0	0	0	0.393543	0	0.555285	0	0	0.499638	0
MIR1256	2.69366	0	0	0	0	0	0.593484	0.785755	0.714605	0
RPS15AP6	0	0.838349	1.04076	1.18063	2.04178	1.11057	1.73978	2.35726	2.35585	1.85667
AL627311.1	0	0	0	0	2.12755	0	1.16663	0	0.999275	0
HSPE1P27	0	0.838349	1.93807	1.51015	1.46701	1.77817	1.16663	1.57151	4.00003	0.915199
ECE1	1638.64	1612.15	4124.26	3366.23	3193.87	2817.02	3390.69	5446.14	1844.52	3766.02
AL031005.1	0.897886	0	4.42652	1.44613	2.57367	0.667597	2.92675	3.28597	5.64128	3.28202
AL031728.1	0	1.6767	6.60978	6.83712	8.2529	4.89153	8.20709	2.35726	14.141	4.15781
PPP1R11P1	0	0	0	0	0	0	0	0	0	0
AL592309.1	0	0	0	0	0	0	0	0	0	0
AL592309.2	0	0	0	0	0	0	0	0	0	0
NBPF2P	14.3662	10.8985	17.6044	11.6971	6.16823	7.78026	6.38597	2.98232	10.8556	6.52463
HS6ST1P1	5.38731	10.0602	3.42748	4.6039	2.04178	3.66864	1.18697	2.98232	0.499638	3.26888
CROCCP5	0	2.51505	1.38768	2.4347	0.489003	0.555285	0	0.625053	0	0.915199
NBPF3	501.02	482.051	533.185	429.543	386.652	334.608	259.728	251.427	324.522	273.872
PFN1P10	0	0	1.7346	0.787087	0	0	0	0	0.357303	0.457599
ALPL	5895.52	5440.89	3691.86	1216.98	1635.32	632.51	263.415	1090.58	13.3537	1587.83
AL359815.1	0	0	0.34692	0.393543	0.531889	0	0	1.25011	0	0
RAP1GAP	243.327	272.464	231.893	226.476	319.685	140.956	155.04	94.9885	220.455	118.709
USP48	2283.32	2307.14	1153.57	1271.19	1253.43	1842.24	1321.29	2545.07	1463.98	2205.07
AL590103.1	0	0	0	0	0	0	0	0.785755	0	0
LDLRAD2	12.5704	20.9587	9.19997	17.0975	11.633	14.3376	13.9182	25.6982	18.4983	17.6384
HSPG2	8748.1	8713.8	16666.1	19159.6	18879.4	17278.7	26214.1	34608.5	24028.3	20229.8
AL590556.1	0	0	0.34692	0.723066	0	0	0.573148	1.41081	4.215	0
AL590556.2	0	0	0	0	0	0	0.573148	0	0	0
CELA3B	0	0	0	0	0.531889	0	0	0	0	0
RN7SL386P	0	0	0	0	0	0	0.593484	0	0	0
RNU6.1022P	0	0	0	0	0	0	0	0	0	0
CELA3A	0	0	0.34692	0	0	0	1.1463	0	0	0.470737
RN7SL186P	0	0	0	0	0	0	0	0	0	0
RNU6.776P	0	0	0	0	0	0	0	0	0	0
LINC01635	0	0	0.693841	0	0.489003	0	0	0	0	0.915199
LINC00339	174.19	142.519	128.625	141.273	122.481	108.262	119.529	85.0951	141.843	113.428
CDC42	2575.14	2416.96	2194.93	2198.38	3024.9	3096.2	4281.02	4079.89	2550.33	3520.81
CDC42.IT1	0	0	0	1.44613	7.67813	4.44855	2.94708	4.23242	12.1424	5.54374
AL031281.1	0	2.51505	2.83538	1.71163	1.55278	3.00105	5.85349	2.98232	9.49898	5.58316
AL031281.2	0	0.838349	3.97787	2.23322	6.16823	6.44507	7.04046	5.94688	7.28546	3.70021
WNT4	20.6514	9.22184	65.7794	52.3903	29.6059	48.4786	68.994	21.7872	26.2805	20.8679
MIR4418	0	0	0	0	0	0	0	0	0	0
PPIAP34	0	0	0	0.329523	0	0	0	1.41081	0	0
AL591122.1	0	3.3534	0	0	0	0	0	0	0	0
ZBTB40	931.107	749.484	1142.76	1210.6	872.7	1023.35	1019.88	1220.44	863.294	961.218
ZBTB40.IT1	2.69366	2.51505	7.20189	4.40242	8.74191	1.89048	5.85349	2.66091	4.99931	5.53061
EPHA8	111.338	128.267	29.478	23.0835	27.0494	10.4444	6.36563	9.4113	4.5723	33.315
MIR6127	0	0	0	0	0	0	0	0	0	0
C1QA	1.79577	0	0	0	0	0	0	0	0.357303	0
C1QC	0	0	0	0	0	0	0	0	0	0.941474
C1QB	0	0.838349	0	0	0	0	0	0	0.357303	0.470737
EPHB2	474.981	425.882	2967.75	1459.03	5496.11	177.087	1383.27	192.085	361.937	392.949
MIR4684	0	0	0	0	0.489003	0	0	0	0	0
AL512444.1	0	0	1.59115	2.82824	4.04068	0	0.573148	0	0.85694	0
MIR4253	0	0	0	0	0.531889	0	0	0	0	0
LACTBL1	0	0	0	0.393543	0	0	1.18697	0	0	0
TEX46	0.897886	2.51505	0.34692	0	0.489003	3.11336	0.573148	0	0.999275	0.457599
KDM1A	4095.26	4660.38	5249.37	4499.94	4986.96	4538.04	3261.18	4243.08	2417.68	3718.91
AL031428.1	0.897886	0	0.448654	0.393543	1.55278	0	0	1.87516	0.85694	0
MIR3115	0	0	0.448654	0	0	0.667597	0	0.625053	0.357303	0.457599
MIR4419A	0	0	0	0.329523	1.59567	1.33519	0	1.57151	0	0.457599
LUZP1	2813.97	2969.43	2320.83	2541.59	2820.95	5291.54	2846.87	5098.79	1724.93	3090.02
AL161672.1	0	5.0301	4.56998	8.86885	8.12425	11.6735	5.75181	13.8044	17.1388	8.31562
RNU6.514P	0	0	0.693841	1.18063	2.53079	2.44576	5.23967	1.57151	2.42849	3.26888
RNU6.135P	0	1.6767	1.48941	2.10518	2.04178	3.44402	5.26001	1.41081	5.28398	4.19722
HTR1D	234.348	311.866	82.818	113.698	15.7166	26.3481	5.26001	42.4672	15.9972	100.692
AL109936.1	0	0	0.34692	0.723066	0	0	0	0	0.357303	0
LINC01355	62.852	104.794	190.875	242.252	124.978	85.2648	127.594	49.0391	434.806	170.433
AL109936.8	8.08097	10.0602	28.5624	23.9064	14.7815	16.6711	11.707	10.6437	50.3533	19.9264
HNRNPR	3230.59	3291.36	4212.25	3500.1	4234.81	4715.93	3163	3745.36	2344.38	2711.3
ZNF436	62.852	54.4927	270.529	308.636	228.002	266.232	574.291	397.848	3129.92	627.742
ZNF436.AS1	3.59154	12.5752	130.586	148.814	78.7975	50.4751	86.0867	26.4839	308.168	44.7441
Y_RNA.4	0	0	0	0	0	0	0	0	0	0
AL109936.2	0	0	0.34692	0.723066	0.531889	0	4.09338	0.625053	21.7808	3.24261
TCEA3	0	4.19175	37.632	83.1262	40.3038	11.7796	141.122	22.5552	1269.6	44.5601
AL357134.1	0	0	1.04076	1.71163	0	0	0.573148	0.785755	16.7118	0
ASAP3	2012.16	1846.05	1801.9	1510.64	1482.86	1635.14	1282.27	1478.19	1680.09	1044.69
E2F2	137.376	135.813	137.968	69.4595	128.718	64.1388	71.1645	40.6098	32.4911	39.474
AL021154.1	3.59154	1.6767	6.71151	3.22179	7.72101	4.33624	4.05271	2.82162	7.42779	3.68707
ID3	367.235	210.426	2146.21	1951.44	1684.2	1622.52	1425.26	943.653	143.405	450.528
MDS2	0	0	1.48941	2.1692	0.489003	0	0.573148	0.625053	0.85694	0
AL451000.1	0	0	0	0	0	0	0	0	0.499638	0
RPL11	5653.99	6266.66	9370.19	8718.67	5865.8	5259.31	5832.07	4865.15	4345	4700.43
ELOA	1113.38	1033.68	818.45	812.299	893.624	1061.25	1042.16	1340.54	989.215	1094.88
ELOA.AS1	27.8345	22.6354	17.1374	18.9278	16.3772	16.1221	12.8329	11.9115	34.5711	18.6193
PITHD1	723.696	632.954	723.883	618.421	769.461	589.953	614.798	531.893	559.356	557.746
LYPLA2	2262.67	2204.86	1641.66	1988.41	1474.69	1274.22	1868.46	1338.47	790.337	1155.72
GALE	415.721	339.532	513.064	426.79	392.657	530.805	731.946	453.656	411.149	351.316
HMGCL	329.524	413.306	427.586	447.681	390.084	345.046	435.995	285.037	433.156	293.589
FUCA1	216.39	166.832	186.618	229.873	159.13	229.577	285.333	262.947	248.69	405.738
CNR2	0	0	0	0.329523	1.50989	0	0	0	0.999275	2.32741
BTBD6P1	0	0	0	0.329523	0	0	1.1463	0	0	0
AL590609.3	0	0	0	0	0	0	0	0	0	0.470737
MIR378F	0	0	0	0	0	0	0	0	0	0
AL590609.2	0	0	0	0.393543	0	0	0	0	0	0
PNRC2	1330.67	1424.36	1367.26	1278.99	1510.46	1338.34	1292.72	1293.64	1023.68	1225.62
SRSF10	3340.13	3288.01	2816.37	2949.99	4183.63	3595.82	3453.51	3610.62	2855.76	3061.61
AL590609.1	0	0	0	0	0	0	0	0	0	0
AL591178.1	0	0	0	0	0	0	0	0	0.357303	0.915199
MYOM3	2.69366	2.51505	4.46824	5.06146	2.04178	1.89048	0.593484	5.80393	22.783	6.01448
AL591178.2	0	0	0	0	0	0	0	0	0	0
IL22RA1	8.97886	6.7068	1.59115	2.23322	0	2.55808	0.573148	1.25011	0.357303	1.39907
IFNLR1	251.408	223.839	199.18	161.146	178.87	94.037	163.267	48.557	216.533	94.3378
AL590683.1	0	0	0	0	0	0	0	0	1.42921	0.457599
AL138902.1	0.897886	0.838349	1.24423	0	0.531889	0.667597	0	0	0	0
GRHL3	68.2393	62.0379	77.549	18.9372	234.273	28.6753	87.8061	76.7909	53.4238	40.2841
STPG1	243.327	254.02	174.338	232.347	130.734	155.3	105.875	100.864	142.691	72.9204
NIPAL3	476.777	373.904	232.68	292.729	489.668	390.498	629.961	631.419	1268.15	970.922
RCAN3	457.024	408.276	502.062	854.627	373.835	407.269	403.549	479.211	249.248	343.198
AL445686.2	0	0	0	0	0.489003	0	0	0	0	0
NCMAP	15.2641	8.38349	1.14249	0.723066	7.67813	1.33519	2.92675	0	11.3552	7.88429
AL445686.1	0	0	0	0	0	0	0	0	0	0
Y_RNA.5	0	0	0	0	0	0	0	0	0	0
SRRM1	1595.54	1845.21	2118.84	2009.66	2046.61	2022.79	1391.11	1564.25	2312.58	1442.19
AL445648.1	0	0	0	0	0.489003	0	0	0	0	0
CLIC4	11007.2	11747.8	4780.52	4248.17	7020.95	13847.5	9205.33	16761.1	17668.2	12936.3
RNU6.1208P	0.897886	0	0.448654	0.787087	2.04178	3.78096	1.78045	2.82162	1.92885	1.86981
RUNX3	21.5493	13.4136	38.2527	5.84855	16.2056	11.6673	12.2395	61.1291	17.9987	26.0197
MIR6731	0	0	0	0	0	0	0	0	0	0
AL445471.1	2.69366	0	0.693841	0.393543	1.06378	0	0	0.625053	1.57155	0.915199
AL445471.2	0	0	0	0	0	0	0	0	0	0
MIR4425	0	0	0	0	0	0	0	0	0.499638	0
AL050344.1	0	0	0	0	0	0	1.18697	0	0.499638	0.941474
AL121994.1	0	0	0	0	0	0	0	0	0	0
AL031432.1	0	0	0	0	0	0	0	0	0.357303	0.941474
SYF2	105.053	110.662	228.382	252.518	227.084	195.43	261.655	231.641	266.459	193.525
AL031432.4	5.38731	7.54515	21.5222	24.4562	6.78589	6.66969	1.1463	0.785755	26.2078	7.87115
AL031432.5	4.48943	3.3534	8.79304	6.37955	8.52748	3.55633	0.593484	0	8.71467	4.21036
RSRP1	325.932	341.208	499.615	644.847	360.186	397.767	591.909	444.513	832.531	609.249
AL031432.3	2.69366	0	2.14153	1.05259	0.489003	3.9993	3.47956	0	3.00076	1.39907
AL031432.2	2.69366	3.3534	2.73364	1.05259	2.4879	0.555285	0	1.25011	8.35737	1.84354
RHD	1.79577	3.3534	9.69034	13.6648	13.1429	8.7848	11.0322	6.57193	8.85407	11.6239
SDHDP6	3.59154	2.51505	1.83634	2.10518	5.14734	3.89327	9.29238	1.25011	5.49894	3.21633
AL928711.1	0	0	0.795574	0.329523	1.46701	0.667597	1.1463	0.625053	2.07118	0.457599
TMEM50A	855.685	923.023	943.211	1135.44	1208.39	1337.25	1436.88	1603.79	675.546	1459.77
RHCE	4.48943	2.51505	5.01863	3.47787	9.99449	10.0077	11.0118	6.75039	53.7055	5.59629
AL031284.1	0.897886	2.51505	0.34692	1.51015	1.02089	0.667597	2.3536	1.41081	3.9274	0
TMEM57	412.129	328.633	293.157	281.017	332.768	471.757	339.453	573.896	340.322	546.516
LDLRAP1	508.203	467.799	309.739	309.163	253.001	421.32	295.609	506.106	296.879	480.224
AL606491.1	1.79577	3.3534	1.38768	0.329523	2.57367	4.6669	2.88607	4.85748	21.6414	1.86981
MAN1C1	191.25	140.004	90.8623	52.2999	105.066	64.2449	298.678	113.293	2840.77	996.324
AL031280.1	1.79577	7.54515	0.34692	1.18063	0.489003	0	1.18697	3.92877	14.1381	4.66796
SELENON	3554.73	3182.37	4878.13	3369.63	3215.49	3673.05	3345.94	3113.89	2261.41	3059.15
AL020996.2	0	0	0	0	0	0	0	0	0	0
AL020996.1	2.69366	1.6767	9.48688	4.27438	12.9714	6.22672	11.646	7.21474	21.7837	9.24395
MTFR1L	453.432	456.9	514.595	434.18	738.937	520.342	1730.79	547.002	3024.27	782.839
AL020996.3	0	0	0	0	0	0	0	0	0	0
AUNIP	444.453	375.581	247.697	137.155	160.64	181.205	82.1967	76.1481	25.1389	108.04
AL033528.2	0	0	0	0	0	0	0	0	0.357303	0
PAQR7	161.619	137.489	263.113	209.499	245.349	243.553	261.858	191.513	278.451	142.362
Y_RNA.6	0	0	0.897307	0	0	0.555285	0.573148	0	0	0.941474
STMN1	2678.39	2650.02	5707.25	4289.5	4954.25	5907.92	3458.83	3965.02	1440.25	3076.18
SNRPFP2	0	0	1.24423	2.1692	0	2.55808	0	4.39313	0.85694	0.457599
AL033528.1	0	0	0.34692	0.393543	1.55278	1.89048	1.18697	1.25011	0.357303	0
MIR3917	0	0	0	0	0	0	0	0	0	0
PAFAH2	234.348	269.11	271.218	293.318	350.629	308.815	349.562	274.858	297.236	320.629
RNU6.110P	0	0	0	0.393543	0.489003	0.555285	0	0	0.357303	0
SCARNA17	0	0	0	0	0	0	0	0	0	0
SCARNA18	0	0	0	0	0	0	0	0	0.85694	0
EXTL1	35.0175	40.2408	74.0301	82.631	100.493	62.916	153.239	39.0205	467.134	346.178
SLC30A2	4.48943	2.51505	2.59019	5.52845	24.5872	3.22567	15.2476	1.41081	25.0692	8.79949
AL391650.2	0	0	0	0	0	0	0.573148	0	2.57082	0
TRIM63	0	0	0	0	6.03958	0.555285	99.062	0	1399.93	72.7627
PDIK1L	83.5034	106.47	95.6489	94.8516	156.9	76.0244	121.74	88.7024	195.778	123.848
FAM110D	3.59154	2.51505	30.237	24.4374	25.3079	38.683	39.011	38.6814	12.8541	39.3032
C1orf232	0	0	0.34692	1.51015	0	0.667597	0	0	0	0.457599
AL391650.1	4.48943	2.51505	4.18134	9.07975	6.21112	5.3345	4.09338	3.60737	3.07046	3.25575
ZNF593	0	0	1.24423	0.723066	0.489003	0.555285	1.18697	0.625053	0.714605	0.915199
CNKSR1	256.795	223.001	334.35	470.58	320.346	261.902	241.269	127.419	124.12	106.98
CATSPER4	2.69366	4.19175	2.93711	6.57161	3.01979	5.10987	2.3536	0.625053	0.499638	0.470737
AL355877.1	19.7535	18.4437	9.69034	12.7497	4.08357	2.33345	5.85349	1.57151	33.6386	2.288
AL355877.3	0.897886	0	0	0	0.489003	0	0	0	0.714605	0
CEP85	1119.66	1077.28	886.71	680.863	903.069	861.064	578.958	592.987	794.808	543.169
AL355877.2	0.897886	3.3534	0.795574	0.787087	1.55278	0.555285	1.76012	5.48253	5.21427	1.39907
SH3BGRL3	706.636	784.695	1019.88	894.199	638.847	1064.15	879.006	1933.74	195.33	1168.29
UBXN11	293.609	308.513	407.981	902.694	317.369	347.042	350.05	226.855	206.961	215.019
CD52	1.79577	0	6.9567	2.49872	4.52968	5.44681	1.1463	4.69678	0	0.470737
CRYBG2	257.693	317.734	52.1975	52.3639	47.8532	31.2396	130.663	39.0205	50.1266	50.2484
AL451139.1	0.897886	1.6767	0.795574	0.723066	1.02089	2.00279	1.16663	1.87516	0.357303	0
ZNF683	0	1.6767	1.34596	3.22179	0	1.33519	0	0	0	0
LIN28A	49278.7	51822.6	31314.8	26332.9	28245	22623.7	7808.63	8529.55	5.92888	15291.5
DHDDS	858.379	838.349	580.372	658.15	565.016	727.739	724.6	880.4	554.043	880.492
AL513365.1	0	0	1.24423	2.76422	4.12645	3.33799	4.66653	3.28597	0.85694	4.64168
AL513365.2	6.2852	1.6767	7.54881	8.86885	2.04178	5.22219	3.5609	7.37544	11.5702	5.55688
HMGN2	719.206	756.191	1655.8	1235.28	1490.28	1355.3	935.374	775.946	648.007	815.303
DPPA2P2	0	0	0	0	0	0	0	0.785755	0	0
RPS6KA1	1420.46	1446.99	801.148	717.451	705.822	692.325	652.35	444.209	303.374	449.483
MIR1976	0	0	0	0	0	0	0	0	0	0
RN7SL679P	0	0	0	0	0.531889	0	0	0	0	2.31427
Y_RNA.7	0	0	0	0	0	0	0	0	0	0
RNU7.29P	0	0	0	0	0	0	0	0	0	0
AL627313.1	0	0	0	0	0	0	0	0	0	0
snoU13	0	0	0	0	0	0	0	0	0	0
AL627082.1	0	0	0	0	0	0	0	0	0	0
AL512408.1	0	0.838349	3.08056	0.659045	4.08357	6.66341	5.23967	2.82162	6.07122	3.71335
ARID1A	6172.96	5678.14	9115.98	8332.63	10697.4	9223.83	6941.43	8702.4	5043.31	5504.29
PIGV	275.651	278.332	279.831	219.675	210.389	172.975	228.334	144.939	200.178	193.015
RN7SL165P	0	3.3534	0.448654	0.393543	0.531889	1.11057	0	0	0.999275	0
ZDHHC18	877.234	837.511	1171.58	1179.18	1003.93	994.882	776.956	850.808	529.979	699.361
SFN	53.8731	27.6655	28.7658	56.2353	26.6891	26.0112	141.675	35.4131	68.2038	33.3938
AL034380.1	0	0	0	0	0	0	0	0	0	0
GPN2	509.999	548.281	498.582	424.683	473.016	435.982	595.722	436.637	595.408	434.919
GPATCH3	162.517	175.215	166.891	169.41	152.688	152.423	178.617	144.171	102.406	130.895
NUDC	1096.32	1153.57	1222.44	1234.86	1116.32	1212.75	1306.61	1337.79	727.014	1001.16
NR0B2	1.79577	0	1.48941	0	0.978006	0	2.94708	0.625053	9.28401	0.928336
KDF1	385.193	396.539	210.512	213.273	146.133	34.4653	138.707	43.11	34.4984	91.0032
RPL12P13	0	0	0.34692	1.71163	1.06378	0	0	0	0	0
AL356390.1	0	0	2.14153	1.71163	0.489003	0	0	0.785755	0.357303	0
OSTCP2	0	0	0.448654	1.83968	0.531889	0	0.593484	0	0	0
TRNP1	109.542	92.2184	59.4046	73.2048	69.9954	62.2546	231.668	107.686	319.017	133.575
FAM46B	3290.75	3490.05	443.925	869.852	896.609	1178.88	590.356	941.689	187.905	997.421
SLC9A1	717.411	564.209	631.915	611.983	713.037	800.687	783.594	1093.61	473.139	729.029
AL590640.2	0	0	0	0	0	0	0	0.625053	0	0
CHCHD3P3	0.897886	0	0.34692	0.329523	1.02089	0	0	0	0.499638	0
NPM1P39	7.18308	5.0301	3.52922	1.83968	0.531889	1.22288	1.78045	0.785755	1.07191	0.470737
SNRPEP7	0	0	0	0	0	0	0	0	0	0
AL590640.1	0	0	0	0	0	0.667597	0	0	0	0.457599
WDTC1	909.558	824.098	1430.42	1592.04	2094.27	1742.12	1737.11	1008.82	1763.89	1202.6
Y_RNA.8	0	0.838349	0	1.83968	1.02089	0	0	0.785755	0.357303	0.457599
FO393419.3	0.897886	0	0	0.787087	1.02089	0	2.29259	2.66091	2.78579	1.84354
TMEM222	657.252	561.694	774.803	771.38	645.735	748.79	620.112	540.68	656.533	613.407
RNU6.48P	0	2.51505	1.59115	4.3384	5.55057	0.667597	2.3536	0.625053	4.3544	2.32741
ACTG1P20	8.97886	8.38349	16.8505	13.7929	21.9277	21.4629	21.6945	15.8225	18.4954	10.2248
SYTL1	261.285	239.768	173.404	176.035	177.824	131.609	221.103	174.619	311.299	60.2368
MAP3K6	490.246	479.536	281.33	266.819	341.055	837.48	339.164	556.199	373.06	365.073
FCN3	2.69366	13.4136	2.73364	4.46644	8.87056	7.89257	44.393	2.19656	9.21431	2.77187
CD164L2	45.7922	33.534	26.6426	49.1873	7.23201	13.2271	6.40631	4.23242	2.85549	9.21768
FO393419.1	0	0	0	0.787087	0	0	0	0	0	0.470737
GPR3	255.897	220.486	110.663	147.935	150.749	232.778	96.2369	91.8632	29.7053	84.9888
WASF2	4044.08	4268.04	3405.58	3234.54	3740.66	4433.92	3148.26	3684.82	2499.2	2828.73
FO393419.2	0	0	0.448654	0.787087	0	1.11057	0	1.57151	1.57155	0.457599
BX293535.1	0	0.838349	6.20285	10.7085	3.59456	3.00105	1.16663	3.28597	16.9965	2.31427
AHDC1	806.301	733.556	2286.2	2014.56	1922.01	2401.53	1490.37	1808.39	1312.74	940.626
FGR	21.5493	15.0903	2.77536	3.15777	1.95601	0.555285	0	2.82162	0	2.77187
AL031729.1	0	0	0	0	0	0.667597	0.593484	0.625053	0.357303	0.470737
LINC02574	0	0	0	0	0	0	0	0	0	0
IFI6	39.507	38.5641	28.4372	35.0461	45.5113	48.023	57.8194	45.0029	53.3482	43.6844
AL445490.1	1.79577	0.838349	0.795574	0	1.06378	2.33345	1.71944	0.625053	1.21424	2.31427
RNU6.949P	0	0	0	0	0	0	0	0	0	0
CHMP1AP1	0	0	0	0	0	0	0	0	0	0
RNU6.424P	0	0	0	0	0	0	0	0	0	0
FAM76A	331.32	269.949	160.573	176.377	207.747	208.663	209.112	198.996	202.976	176.96
AL020997.1	1.79577	0	0.448654	0.329523	2.08467	2.44576	1.1463	0	2.99783	0.457599
RPEP3	0	0.838349	0.795574	1.18063	0	0	0.573148	0	0	2.35368
STX12	247.816	238.93	291.561	341.944	573.123	693.866	661.988	961.495	871.489	846.719
AL020997.2	0	0	1.34596	0.787087	0	1.33519	0	0	1.21424	0.457599
AL020997.3	0	0.838349	1.38768	0.787087	0.489003	2.44576	2.33326	1.25011	5.14164	3.25575
RNU6.1245P	0	0	0	0	0	0.667597	0	0	0	1.88295
PPP1R8	752.428	704.214	749.702	702.673	759.921	683.372	683.171	734.14	428.238	638.159
SCARNA1	3.59154	4.19175	2.63191	2.89226	4.70123	9.34008	5.30068	5.32183	6.21355	6.47208
THEMIS2	380.704	331.986	167.373	115.828	95.3461	86.5811	41.3646	56.4323	9.21431	83.7583
RPA2	714.717	725.172	750.617	626.633	657.42	680.165	589.21	423.547	590.996	525.489
SMPDL3B	1744.59	1861.97	159.303	324.749	89.8385	169.419	95.5824	245.588	79.0564	513.239
AL512288.1	12.5704	5.0301	2.69192	3.28581	2.57367	0.667597	1.78045	5.01818	1.35658	8.8389
XKR8	489.348	470.314	471.467	428.729	286.081	309.233	263.886	302.7	199.037	251.056
EYA3	834.136	741.939	1056.31	878.668	1092.23	1202.37	926.635	871.56	908.654	908.668
AL512288.2	0.897886	0.838349	2.63191	1.18063	1.55278	1.77817	2.3536	4.39313	2.92812	2.32741
RN7SL559P	0.897886	5.0301	1.14249	2.76422	2.57367	3.22567	4.68686	7.05404	4.35733	3.29516
SPCS2P4	13.4683	11.7369	11.0963	7.3041	6.12535	10.12	4.60552	6.57193	8.78437	6.05389
AL137792.2	0	0	0	0	0	0	0	0	0	0
AL137792.1	0	0	0	0.659045	0	0	0	0	0	0
RNU6.176P	0	0	0	0	0	0	0.573148	0	0	0
PTAFR	45.7922	36.049	11.9936	25.3902	11.7188	32.5686	26.8529	28.6628	3.21279	28.7653
DNAJC8	1776.92	1612.98	1990.86	1692.27	1800.65	1962.88	1885.17	1499.14	1220.21	1642.97
ATPIF1	438.168	433.427	539.375	494.097	420.316	425.076	761.42	724.461	949.959	551.745
AL353622.1	27.8345	24.3121	42.5775	47.3194	20.2034	22.7918	34.3445	15.6618	109.909	40.3367
AL353622.2	0	0	0	0.329523	0	0	0	0	0.999275	0
SESN2	3345.52	3334.12	649.385	471.703	637.723	765.037	1005.52	1121.51	596.196	1014.5
MED18	76.3203	94.7335	130.354	113.725	75.7777	71.6945	125.996	55.4504	75.1987	87.0031
PHACTR4	1748.18	1500.65	1309.16	1179.38	1214.02	1459.33	1149.4	1473.81	912.883	1369.23
Y_RNA.9	0	0	0	0	0.531889	0	0	0.785755	0.357303	0.470737
CR391992.1	0	0	1.48941	1.38211	0.489003	0	0.593484	1.25011	1.71388	1.39907
RNU6ATAC27P	0	3.3534	2.14153	3.15777	1.06378	1.77817	0.593484	0	3.42776	1.8304
RCC1	1880.17	2058.99	1697.53	1383.44	1367.38	880.162	783.838	666.278	323.726	824.558
SNHG3	1075.67	1072.25	647.892	610.176	483.894	599.748	364.81	560.717	228.612	523.466
SNORA73A	0	0	0	0	0	0	0	0	0	0
SNORA73B	12.5704	22.6354	7.36363	12.0266	24.2268	15.3422	14.6134	14.1081	3.00076	18.5536
PRDX3P2	2.69366	5.0301	6.16113	2.04116	2.61656	1.66585	1.1463	1.41081	2.42849	5.55688
AL513497.1	2.69366	5.86845	7.85401	9.53732	26.4574	20.9076	12.8329	17.394	12.7844	6.49836
TRNAU1AP	171.496	122.399	354.656	311.852	340.858	288.662	286.686	247.91	218.192	205.933
SNHG12	182.271	213.779	137.653	140.433	99.6441	113.616	78.8595	133.527	77.0549	115.206
SNORD99	1.79577	4.19175	2.0398	2.10518	1.06378	1.77817	1.76012	3.12527	0.999275	0.470737
SNORA61	0	0	0	0	0	0	0	0	0	0
SNORA44	0	0	0	0	0	0	0	0	0	0
SNORA16A	0	0	0	0	0	0	0	0	0	0
SNORA16A.1	0	0	0	0	0	0	0	0	0	0
TAF12	280.14	237.253	206.499	169.017	217.424	183.301	224.688	192.781	173.762	183.666
RAB42	129.296	76.2898	68.688	44.5834	54.4247	60.932	31.4787	29.9306	38.8528	37.5648
LINC01715	0.897886	5.0301	1.04076	0.723066	0	0.555285	0	0.625053	2.42849	1.38594
RNU11	0	0	0	0	0	0	0	0	0	0
AL360012.1	0	0	0	0	0	0	0	0	0	0
GMEB1	572.851	513.07	529.134	475.834	427.128	473.024	303.491	412.296	229.895	378.225
SCARNA24	0	0	0	0.393543	0.531889	0	1.1463	1.57151	1.57155	0
YTHDF2	2242.92	2488.22	1945.94	1940.65	2090.98	2075.8	1806.08	1900.11	1160.7	1791.96
OPRD1	79.9118	101.44	38.3076	23.3396	56.149	26.2358	28.1008	20.0372	9.64131	45.4359
AL009181.1	1.79577	0	0	0	0	0.667597	1.1463	0.785755	1.71388	1.39907
Y_RNA.10	0	0	0	0	0	0	0	0	0	0
EPB41	2522.16	2608.94	2164.29	2091.62	2170.36	1970.9	1742.72	1048.61	1043.02	1458.87
AL138785.1	1.79577	0	1.83634	2.4347	1.50989	0.667597	0.573148	0.625053	0.714605	0.457599
Y_RNA.11	0	0	0	0.723066	0.531889	0	0	0	0	0
Metazoa_SRP	0	0	0	1.83968	0	0.555285	0	0	0.714605	0
TMEM200B	280.14	134.974	633.509	524.869	530.006	518.377	492.705	211.247	179.917	249.488
AL357500.1	0	0	0.795574	0	0.531889	0	0	0	0.357303	1.39907
SRSF4	1701.49	1820.9	2063.86	1916.75	2258.97	2229.02	1951.98	1759.57	1269.55	1434.62
uc_338	0	0	0	0	0	0	0	0	0	0
MECR	418.415	453.547	339.267	388.846	327.938	504.351	326.124	237.552	444.491	288.529
AL590729.1	5.38731	5.86845	3.03884	4.93342	3.63745	6.66969	5.15833	3.60737	5.71391	3.25575
PTPRU	3711.86	3436.39	2795.76	2526.22	1960.83	4108.88	1165.95	2191.45	1972.25	1757.57
LINC01756	0.897886	5.86845	0	0.329523	0	4.11162	0	7.53615	1.21424	1.84354
AL671862.1	0	0	0	0	0	0	0	0	0	0
AC092265.1	0	0	0	0	0	0	0	0	0	0
AL645944.2	0	0	0	0	0.531889	0	0.593484	0	0.357303	0.457599
AL645944.1	0	0	0	0	0	0	0	0	0	0
LINC01648	0	0	0	0	0	0	0	0.785755	0	0
AL137076.1	0	0	0.34692	0	0.489003	0	0	0	0	0
AL021921.1	0	0	0	0	0	0	0	0	0	0
AL161638.2	0	0	0	0	0	0	0	0	0	0
AL161638.1	0	0	0	0	0	0	0	0	0	0
MATN1	0	0.838349	1.83634	1.83968	2.4879	7.78026	7.57294	11.7508	28.0699	9.72783
MATN1.AS1	0	3.3534	2.28499	1.11661	3.99779	4.33624	14.5117	8.30415	30.8499	12.029
LAPTM5	0.897886	5.0301	4.22306	0.329523	8.91345	23.4531	30.9666	19.1263	15.0647	12.4603
MIR4420	0	0	0	0	0	0	0.573148	0	0	0
AL137027.1	0	0	0	0	0	0	0	0	0	0
LINC01778	0	0	0	0	0	0	0.593484	0.625053	1.57155	3.25575
RN7SKP91	0	0	0	0	0.531889	0	0	0	0.357303	0
AL445235.1	0	0	0	0	0	0	0.593484	0	0	0
SDC3	1213.94	1264.23	2864.79	2347.93	1772.05	3259.29	3455.2	4082.46	2471.36	3843.23
RN7SL371P	0	0	0	0	0	0	0	0	0.357303	0.470737
PUM1	3956.08	4215.22	4619.96	4563	5009.54	4343.5	3903.88	4556.95	4022.31	4558.16
AL356320.2	0.897886	1.6767	0.693841	0.659045	3.50879	1.11057	1.73978	1.41081	2.71316	1.38594
AL356320.1	0	0	0	0.723066	0	0.555285	1.1463	1.41081	0.357303	0.470737
SELENOWP1	0	0.838349	0.897307	1.38211	1.9989	0	3.47956	0	1.07191	0.457599
AC114495.1	0	0	0	0	0.531889	0	0	0	0	0
NKAIN1	731.777	866.853	613.337	451.937	403.707	353.544	148.857	373.401	23.4976	338.567
SNRNP40	1160.97	1127.58	1109.24	902.933	964.494	992	679.02	685.065	484.148	729.959
AC114495.2	0.897886	5.0301	10.5459	12.8137	12.1649	10.4444	15.8207	10.6614	18.9283	14.9585
ZCCHC17	545.914	564.209	589.974	476.205	507.777	563.361	770.058	648.187	492.854	592.055
AL451070.1	0	0	0	0	0	0	0	0.625053	6.14092	0.470737
FABP3	76.3203	143.358	44.3121	53.6538	142.093	99.4964	786.703	117.24	3349.83	439.272
SERINC2	893.396	930.568	414.692	508.282	318.175	480.031	458.51	499.48	335.014	553.457
AC209007.1	0	0.838349	0.693841	0.329523	0	0	0	0	0.999275	0
RNU6.40P	0	0	0	0	0	0	0	0	0	0
LINC01225	0.897886	0	0.34692	1.57417	0	1.77817	0	1.25011	1.35658	0.470737
Y_RNA.12	0	0	0	0	0	0	0	0	0	0
LINC01226	0	0	2.08152	3.08433	1.02089	1.89048	0	0.785755	3.42776	1.39907
AC114488.1	0	0	0	0.329523	0	0	0	0.625053	0	1.84354
TINAGL1	264.876	248.99	53.8721	52.4091	178.759	57.4754	332.51	37.449	601.953	733.241
HCRTR1	11.6725	3.3534	4.18134	3.34983	6.70012	3.89327	5.81282	2.66091	6.42559	7.45297
PEF1	988.572	1000.99	1003.55	864.864	1183.86	1045	1404.34	939.725	1223.84	1022.58
AC114488.2	2.69366	2.51505	10.4442	5.78453	2.4879	6.11441	6.44698	4.39313	31.2856	13.8988
AC114488.3	0	0	0	1.44613	0.489003	0.555285	0	0	0.499638	0.470737
COL16A1	198.433	145.034	280.485	301.79	67.8851	254.553	187.112	560.931	1012.28	982.804
ADGRB2	865.562	950.688	3393.69	682.616	1140.95	821.57	1357.66	872.453	4855.58	1460.31
MIR4254	0	0.838349	1.04076	1.11661	0.489003	1.22288	0.573148	0	1.92885	0.457599
AL354919.2	0	0	0	0	0	0	0	0	0.499638	0.457599
SPOCD1	87.0949	83.8349	71.4633	61.7807	59.5721	54.7988	43.3484	55.7895	10.9282	59.8449
AL354919.1	0	0	0	0	0	0	0	0	1.85622	0
AL136115.2	0	0	4.67171	0.659045	3.99779	1.33519	1.18697	4.23242	4.56937	4.15781
PTP4A2	3173.13	3293.88	3531.5	2429.68	3484.12	4548.84	3613.96	3768.44	3633.97	3048.99
AL136115.1	0	3.3534	5.61074	6.96516	3.55168	8.67248	6.48765	8.7685	6.71319	3.22947
AL136115.3	0	0	0	0	0	0	0	0	0.357303	0
KHDRBS1	4337.69	4458.34	5157.12	4262.11	5105.55	5932.2	3680.93	4722.02	2986.44	3435.3
AL445248.1	0.897886	1.6767	6.26286	7.42272	8.78479	12.2225	8.78024	16.626	17.1388	7.43983
TMEM39B	443.555	462.769	388.321	432.992	364.004	512.113	253.525	322.754	179.536	248.768
MIR5585	0	0	0	0	0.489003	0.667597	0	0	0.999275	0
Metazoa_SRP.1	0	0	0	0	0.531889	0	0	0.625053	0.357303	0
KPNA6	3490.08	3791.02	2903.69	2480.32	3526.91	3288.58	3554.84	3786.84	3326.78	3402.05
AL049795.2	0	0	0	0	0	0	0	0	0	0
TXLNA	2841.81	2665.11	1705.94	1645.39	1703.76	2020.13	1674.86	2159.5	1811.91	2173.09
CCDC28B	130.193	85.5116	156.97	187.952	136.036	222.315	185.23	218.551	169.683	171.624
AL049795.1	2.69366	1.6767	2.73364	9.00631	5.06157	5.3345	3.54057	0.625053	3.28543	2.32741
IQCC	44.8943	62.0379	87.5966	106.428	99.4041	82.0265	85.8999	57.2181	62.2808	56.0658
DCDC2B	4.48943	3.3534	19.6442	31.8695	13.6319	18.6802	17.0483	12.2152	26.6407	14.7877
TMEM234	64.6478	53.6544	106.589	151.396	80.3073	99.4901	123.602	104.025	84.0645	136.126
EIF3I	1959.19	2034.67	2049.26	1785.4	1701.13	1757.05	2350.14	1568.82	1462.01	1654.99
MTMR9LP	211.003	222.163	181.659	203.099	137.546	134.068	109.643	124.384	70.4144	113.596
FAM167B	25.1408	51.1393	27.6416	28.5008	19.3112	12.5595	15.2069	9.55425	29.0663	13.428
LCK	2026.53	1841.02	168.938	240.9	32.1366	78.1458	4.74787	92.4883	0.357303	144.245
Metazoa_SRP.2	0	0	0	0	0	0	0	0	0	0
Y_RNA.13	0	0	0	0	0.489003	0	0	0	0	0.470737
HDAC1	2493.43	2199.83	3744.47	2938.66	2622.83	2115.36	1485.13	1706.87	1146.49	1880.93
MARCKSL1	5640.52	5733.47	5956.69	4980.98	4210.54	5113.82	3232.88	3633.37	1646.7	3979.05
AL109945.1	0	0	0.448654	0.329523	1.02089	1.33519	0	1.41081	2.21352	0.457599
TSSK3	2.69366	5.86845	13.0578	18.3233	12.3365	16.7834	13.3654	8.6078	51.062	14.814
FAM229A	52.9753	56.1694	100.923	154.23	120.036	140.525	118.874	99.3283	142.415	78.2539
BSDC1	1387.23	1327.11	1180.05	1479.13	1216.22	1567.51	1561.41	1415.74	1427.99	1622.55
GAPDHP20	5.38731	0.838349	1.24423	1.44613	0	0	1.78045	0	2.42849	0
AL356986.1	0	0	0	1.31809	0	0	0	0	0	0
LRRC37A12P	22.4471	3.3534	4.97691	6.38897	1.9989	1.11057	0.593484	1.41081	2.07118	1.3728
RN7SL122P	1.79577	0	0	0	0	0	0	0	0	0
AL033529.1	0.897886	2.51505	1.04076	0	0.531889	0.667597	0	0	1.35658	0.928336
ZBTB8B	214.595	159.286	274.804	191.089	232.909	110.839	129.479	74.9158	258.767	195.395
ZBTB8A	145.457	167.67	201.225	132.404	254.434	193.078	148.8	204.21	151.417	180.934
ZBTB8OS	201.126	157.61	192.623	200.363	183.752	209.549	291.353	307.753	239.821	243.106
Y_RNA.14	1.79577	0	3.4692	5.78453	2.08467	2.00279	1.73978	0.625053	6.14385	6.04076
RBBP4	3987.51	4074.38	5896.69	4824.49	6059.52	5189.19	3816.93	3770.74	4899.65	4371.01
SYNC	3.59154	0	1.93807	3.80739	3.19133	4.77921	2.96742	64.2721	43.0649	133.641
AC114489.1	0	0	0	0	0	0	0	1.41081	1.07191	0.941474
KIAA1522	3929.15	3704.67	2609.61	2755.05	1943.71	1656.85	1674.25	2178.06	1464.39	1722.85
YARS	4007.26	3656.88	1658.96	1344.8	1659.46	2144.47	1736.18	1862.47	1773.76	2540.63
S100PBP	1178.92	1143.51	1038.41	966.312	1253.23	1049.44	831.381	869.648	1125.37	1096.56
FNDC5	19.7535	14.2519	174.88	92.093	68.1424	160.759	38.5395	114.365	348.165	195.172
HPCA	9.87674	14.2519	6.87326	5.39098	4.61545	3.00105	1.73978	1.41081	1.21424	5.55688
TMEM54	106.848	75.4515	393.09	94.5936	690.843	92.9327	292.19	28.0555	107.76	137.954
RNF19B	496.531	492.111	358.501	237.196	425.3	384.209	346.185	404.956	402.559	407.527
AL031602.1	0	0	0	0.659045	0.978006	0	0.593484	0	0.714605	1.3728
AL355864.1	0	0	0.448654	0.988568	0	0	0	0.785755	1.71388	0.457599
AL355864.2	0.897886	0.838349	0	0.329523	0.978006	0.667597	1.16663	4.85748	2.07118	1.39907
AL020995.1	0	0.838349	0.693841	2.49872	1.50989	1.89048	1.18697	5.96464	7.35516	1.39907
AK2	1296.55	1333.81	1184.72	1158	924.439	1013.44	1162.76	1105.15	2217.71	1353.72
Metazoa_SRP.3	1.79577	0	0	0.393543	0.489003	1.22288	0.573148	0	2.92812	0
AZIN2	9.87674	12.5752	74.2804	75.0331	58.2766	150.851	65.9859	183.048	96.9883	135.001
AL662907.1	2.69366	4.19175	7.14188	22.7163	8.21002	60.0335	2.31293	84.2916	11.6428	39.4346
TRIM62	304.383	297.614	165.093	423.728	126.462	1020.69	185.783	1576.45	93.5606	762.885
AL662907.2	6.2852	14.2519	11.6101	49.0574	8.78479	120.722	5.30068	137.491	7.42779	74.1355
AL662907.3	0	0	0	0.329523	0.531889	0	0.593484	0.785755	0.714605	2.32741
ZNF362	365.439	387.317	373.675	372.671	544.83	777.765	456.133	1020.64	484.107	948.744
AL513327.3	0.897886	2.51505	9.75035	5.65649	9.54837	10.4506	8.73957	15.5011	7.28546	16.1999
A3GALT2	0	0	0	0	1.46701	1.89048	0.593484	5.78618	0.357303	1.84354
AL513327.1	0	1.6767	38.391	53.3694	46.1718	114.845	45.5393	110.204	93.3427	123.024
PHC2	72.7287	95.5718	859.066	736.838	1129.71	1730.48	1231.18	2018.5	851.358	1346.98
MIR3605	2.69366	0	0	0.723066	0	1.66585	0.573148	1.41081	0.85694	2.32741
RN7SKP16	0	0	3.32575	3.61533	0.489003	2.44576	2.92675	3.76807	8.21503	11.1663
AL513327.2	0	0	2.18326	4.00887	2.4879	3.22567	1.1463	0.785755	3.78506	5.09928
TLR12P	0	0	0	0	0	0	0	0	0.85694	0
ZSCAN20	153.538	160.125	156.475	141.484	150.603	152.193	125.793	151.011	118.415	159.7
AC115285.1	0	0	0.693841	3.80739	1.02089	2.00279	1.18697	2.82162	1.57155	0.941474
CSMD2	1042.45	1203.87	363.955	424.515	71.5053	149.179	18.6864	246.178	13.3537	333.82
HSPD1P14	0.897886	4.19175	0	0	0	0	0	0	0	0.915199
HMGB4	0	0	1.04076	0	0	0	0	0	0	0.915199
CSMD2.AS1	4.48943	0	0.795574	0.393543	0	0.667597	0	0	0	0.915199
RNA5SP42	0	0	0	0	0	0	0	0	0	0
C1orf94	249.612	309.351	8.14092	14.6628	1.02089	4.89153	2.37394	18.3405	0	14.8402
AC115286.1	0	0	0	0	0	0	0	0	0.357303	0
MIR552	0	0	0	0	0	0	0	0	0	0
SMIM12	347.482	334.501	352.283	328.119	347.524	399.052	571.67	499.695	292.467	371.49
GJB5	7.18308	6.7068	2.83538	1.05259	2.57367	0.555285	4.11371	2.19656	2.78579	0.928336
GJB4	0.897886	0	2.28499	1.05259	3.50879	0.555285	1.18697	0.785755	4.14237	0
AL121988.1	0	0.838349	0	0	0	0	0.593484	0	0.499638	0
GJB3	18.8556	9.22184	7.71055	4.53988	6.78589	1.11057	8.22743	1.87516	10.568	0.470737
GJA4	20.6514	10.8985	97.7619	3.42327	78.5229	2.55808	30.1291	1.41081	12.5665	10.1854
AL122010.1	17.0598	13.4136	14.0751	20.9143	13.2716	13.3457	16.9263	35.5738	19.7852	23.1953
DLGAP3	296.302	273.302	138.56	187.461	53.1465	141.068	22.2067	80.7197	2.50112	71.3899
AC114490.1	26.0387	47.7859	78.3366	99.1787	69.5064	74.2651	49.7954	55.1645	121.982	80.6076
AC114490.2	0	0.838349	0	0	0.489003	0	0	0	2.64345	0.941474
TMEM35B	5.38731	4.19175	2.63191	6.05003	2.4879	2.55808	1.16663	1.41081	0.357303	5.12556
ZMYM6	152.641	147.55	114.341	135.901	118.312	125.376	175.958	191.995	340.755	205.423
RPL12P45	0	0	0	0	0	0	0	0	0	0
ZMYM1	737.164	689.123	520.065	520.084	666.342	542.491	519.375	642.402	316.891	492.697
EFCAB14P1	0	0	0	0	0	0	0	0	0	0
AL590434.1	0.897886	0.838349	0.34692	1.18063	3.01979	0.667597	4.66653	2.66091	1.92885	1.38594
SFPQ	5213.12	5020.88	7939.78	8647.11	11133.2	9289.94	4476.02	5986.64	3427.08	6385.54
Y_RNA.15	0	0	0	0	0	0.667597	0	0.625053	0.357303	0
ZMYM4	2892.09	2794.22	3298.01	2983.24	2814.87	3015.33	2494.16	2945.95	2344.29	2673.58
RN7SL503P	0.897886	0	0.795574	0	0	1.66585	0.593484	1.41081	0.499638	0
SNORA62	0	0	0	0	0.531889	0	0	0.625053	0	0
RPL5P4	11.6725	10.8985	9.38514	14.9283	12.2078	15.1176	10.459	11.4472	8.00006	14.4221
ZMYM4.AS1	0	0	0.693841	1.51015	0.531889	0.555285	0.573148	1.87516	1.07191	1.39907
Metazoa_SRP.4	0	0	0	0	0	0	0	0	0	0
KIAA0319L	3103.99	2967.76	1651.93	1802.56	1532.54	1757.69	1955.89	1867.45	2141.43	1916.92
AC004865.1	0	0.838349	0	0	1.02089	0	0.593484	0	0.357303	1.38594
NCDN	946.371	936.436	617.882	752.486	483.508	549.148	634.627	752.766	867.271	852.994
AC004865.2	6.2852	0.838349	5.36555	9.5279	4.57257	4.44855	3.47956	1.57151	21.4932	3.26888
TFAP2E	11.6725	20.1204	24.0524	21.6185	20.5465	16.6711	10.4793	17.2333	65.9176	15.7292
PSMB2	1401.6	1585.32	1207.16	1208.76	1245.63	1433.27	1764.75	2089.05	1041.96	1597.32
C1orf216	634.805	535.705	552.371	404.684	323.486	369.035	177.165	303.307	157.326	360.823
CLSPN	550.404	572.593	641.681	400.893	665.81	821.127	296.141	523.625	89.5576	333.104
AL354864.1	0	0.838349	0	0.787087	0.489003	2.33345	0	1.25011	0	0.470737
AGO4	735.368	620.379	1153.74	1122.89	2245.71	1796.26	1367.18	1169.53	1924.5	834.809
AGO1	3302.42	3099.38	3173.52	3251.08	2998.32	2575.86	2217.77	3264.71	1685.32	3545.8
AL139286.1	0	0	0	0	1.50989	0	0.593484	0.785755	0	0.457599
AL139286.2	0	0	0	0	0	0	0	0	0	0
AGO3	546.812	632.954	982.204	959.791	1260.02	1261.68	1093.4	1532.32	1930.46	1344.17
AL138787.2	1.79577	3.3534	6.01767	4.85998	4.65834	5.55912	4.66653	4.07172	5.64128	11.1138
AL138787.1	0	0	1.93807	7.0386	1.06378	0.667597	0.593484	2.98232	0.357303	0.915199
TEKT2	11.6725	12.5752	63.0721	457.392	41.9852	32.8992	17.5605	18.5012	10.5012	6.04076
ADPRHL2	378.908	400.731	399.232	540.767	369.752	341.271	570.568	357.9	374.579	356.558
COL8A2	117.623	102.279	31.356	36.1627	27.3068	147.619	8.71923	89.149	69.4848	101.567
TRAPPC3	288.221	273.302	449.035	464.574	342.779	398.403	531.598	476.318	555.002	458.977
MAP7D1	940.086	866.015	2418.73	2044.35	2587.65	3103.79	2808.82	3336.51	1955.53	2146.62
RN7SL131P	0	0	0	0	0	0	0	0	0	0.457599
THRAP3	4147.33	4252.95	3290.1	3099.02	2971.85	3016.02	2512.11	2888.84	2398.04	2558.78
UBE2V2P4	0	0	0	1.11661	0	0	0	0.625053	1.07191	0.470737
SH3D21	185.862	237.253	299.459	457.529	232.609	346.606	434.15	453.674	693.585	207.763
EVA1B	86.197	75.4515	308.163	330.349	188.985	406.277	150.987	335.327	127.551	222.512
AL591845.1	160.722	214.617	146.492	308.013	148.621	230.226	218.119	213.104	456.273	123.429
STK40	1020	984.222	580.565	637.643	558.994	1363.71	1174.27	1595.68	1003.01	1475.59
LSM10	286.426	236.415	166.142	146.025	138.43	166.156	289.162	175.637	169.253	190.504
RNU4.27P	0	0	0.34692	0	0	0	0	0	0	0
OSCP1	24.2429	26.8272	95.0671	180.222	72.0973	74.2526	128.451	68.3261	118.476	66.6563
SNORA63C	0	0	0.448654	0.329523	0	0	0.593484	0	0.357303	0
MRPS15	612.358	649.721	600.293	438.295	438.357	431.409	662.626	428.708	393.295	427.779
CSF3R	0	0	203.831	38.8347	114.34	23.6714	95.8709	10.9651	176.245	12.5522
FTLP18	0	0	0	0	0	0	0	0.625053	0	0
AL596257.1	0	1.6767	40.5194	59.8959	0	3.00105	1.16663	0	0	0.915199
AC117945.2	3.59154	0	365.476	531.578	0	9.78305	0	0	0	6.43267
AC117945.1	0	0	2.93711	10.2604	0	0	0	0	0.357303	0
GRIK3	188.556	180.245	2653.85	4725.01	76.4209	292.362	16.1905	34.0023	2.35585	115.871
AL031430.1	0	0	0	0	0	0	0	0.625053	0	1.3728
MIR4255	0	0	0	0	0	0	0	0	0	0
RNU6.636P	0	0	0	0	0	0	0	0	0.499638	0
AL353604.1	0	0	0	0	0	0	0	0	0	0
RNA5SP43	0	0	0	0	0	0	0	0	0	0
RPS29P6	0	0	0	0	0	0	0	0	0	0
LINC01137	1.79577	3.3534	6.60978	5.98601	3.59456	17.6756	9.98754	27.8948	13.711	16.6575
ZC3H12A	132.887	165.993	148.407	211.719	201.493	465.213	211.733	367.221	66.9837	133.236
MIR6732	0	0	0	0	0	0	0	0	0	0
MEAF6	249.612	254.02	395.486	424.363	350.886	392.851	385.602	290.984	409.171	338.438
MIR5581	4.48943	8.38349	6.05939	11.5691	7.23201	6.44507	8.73957	6.10758	15.1403	10.238
SNIP1	216.39	217.971	329.97	321.796	294.463	290.366	281.036	280.269	198.264	265.741
FTH1P1	1.79577	0	2.48846	1.18063	2.04178	1.33519	0	1.41081	3.35806	1.86981
AL034379.1	4.48943	3.3534	4.42652	3.74337	13.8035	1.89048	5.23967	7.51839	3.8577	0
DNALI1	173.292	233.061	443.594	1150.72	356.797	294.115	355.945	207.747	342.59	168.197
GNL2	1494.08	1699.33	1040.97	899.387	934.982	1139.08	1032.14	1071.9	1135.55	1173.8
AL513220.1	0	0	0	0	0	0	0	0	0	0.457599
RSPO1	0.897886	6.7068	123.517	37.0213	7.06047	91.7098	2.90641	0.785755	7.42779	4.65482
C1orf109	688.678	709.244	548.33	417.175	467.406	421.856	344.977	272.947	376.008	404.544
CDCA8	887.111	818.229	746.519	470.55	1219.21	1060.5	483.132	499.409	116.837	355.59
EPHA10	13.4683	25.1505	7.01671	9.00631	2.53079	1.22288	4.11371	1.25011	2.35585	9.25709
Y_RNA.16	0	0	0	0	0	0	0	0	0	0
ACTN4P2	0	0	0	0	0.531889	1.33519	0	0	0.357303	0
AL929472.1	0	0	0	0	0	0	0	0	0.357303	0
MANEAL	106.848	97.2485	138.61	98.659	49.2172	27.677	21.5522	19.4299	20.3545	108.981
AL929472.3	0	0	0	0	0	0	0	0	0	0
YRDC	279.242	277.494	238.057	200.329	267.619	306.344	259.094	294.484	167.693	286.635
C1orf122	117.623	139.166	283.151	227.45	209.643	266.8	427.032	335.541	198.035	283.771
MTF1	349.278	396.539	474.741	446.026	434.385	377.047	350.315	462.478	274.39	447.837
AL929472.4	0	0	1.48941	1.05259	0.531889	1.89048	0	0.625053	1.21424	0
AL929472.2	0	0	0	0	0	0	0	0	0	0
INPP5B	990.368	885.297	436.371	759.801	408.434	508.001	382.655	443.512	282.962	493.993
SNORA63	0	1.6767	0	1.44613	0	0	0	0	1.07191	0
RNU6.584P	1.79577	0	0.795574	0.659045	0	0	0.573148	0	0.85694	0
Metazoa_SRP.5	0	0	0	0	0.531889	0	0	0	0.499638	0
SF3A3	2089.38	2321.39	1894.03	1731.5	1805.75	2299.98	1563.83	1908.72	1118.07	1720.53
RNU6.510P	0.897886	0.838349	3.52922	6.43415	3.14845	7.11266	4.7072	13.7867	2.21352	6.98223
FHL3	852.991	700.86	696.359	822.691	746.916	2371.05	544.959	1417.51	383.445	1104.05
UTP11	354.665	328.633	330.087	268.644	278.043	422.886	319.884	452.049	240.981	341.315
POU3F1	117.623	189.467	26.0088	59.8601	8.69902	27.677	0.573148	36.8417	1.71388	35.7869
AL139158.2	7.18308	13.4136	2.73364	3.61533	2.4879	7.11266	1.78045	4.53607	3.35513	8.3813
AL139158.1	1.79577	0.838349	0.34692	1.18063	0	0	0	0	0	0.457599
MIR3659	0	0	0.34692	0.329523	0	0	0	0	0	0.470737
AL139158.3	0.897886	4.19175	0	0.329523	0	1.33519	0	0	0	0.928336
LINC01343	3.59154	3.3534	0	6.49817	0	0	0	0	0	0.470737
AL513479.1	0	0	0.795574	2.89226	0	0.555285	0	0	0	0
RNU6.753P	0	0	0	0	0.531889	0	0	0	0	0.915199
LINC01685	0	0	0.795574	0	0	0	0	0	0.499638	0
AL354702.1	6.2852	6.7068	21.1153	22.2324	15.8453	17.008	22.288	15.3582	4.642	24.5549
AL354702.2	0	0	0	0	0	0	0	0	0	0
RRAGC	157.13	122.399	181.114	172.182	242.921	244.876	261.041	374.794	224.835	321.623
AL139260.2	0	0	0	0	0	0	0	0	0	0
AL139260.1	0	5.86845	5.61074	8.09119	2.44501	6.11441	8.6989	3.44667	8.35737	7.4661
MYCBP	503.714	532.352	433.655	362.179	453.585	498.748	550.979	369.008	366.251	398.872
AL139260.3	0	0	0.34692	1.83968	0.489003	0.555285	0	0	2.14382	0
GJA9	0	0	1.48941	0.393543	0.489003	0	1.16663	0	1.92885	0.457599
RHBDL2	13.4683	5.86845	3.7744	12.7403	5.59346	9.67074	3.52023	7.05404	9.28694	6.96909
RNU6.605P	0	0	0	0	0	0	0	0.785755	0	0
Y_RNA.17	0	0	0	0	0	0	0	0	0	0
EIF1P2	0	0	0	0	0	0	0	0	0	0
AKIRIN1	5399.88	5921.26	2542.57	2782.86	3015.94	3480.96	3550.39	4188.39	3419.1	4153.78
NDUFS5	413.027	445.164	1081.99	932.682	792.726	911.826	1565.03	1157.65	879.12	700.185
MACF1	14973.1	13032.1	6402.16	10002.9	15037.5	27934.6	19909.7	54725.3	16000.8	21015.3
RNU6.608P	0	0	0	0.393543	0	2.55808	2.31293	0.625053	0.357303	1.3728
RNA5SP44	0	0	0	0.393543	0.531889	0.667597	0	1.87516	1.99855	0.928336
AL356055.1	0	0	0.34692	0	1.55278	2.33345	4.66653	1.57151	2.28615	4.62854
AL442071.1	0	0	0	0	1.02089	0	2.37394	4.39313	3.9274	0.928336
HSPE1P8	0	0	0	0.787087	1.02089	0	1.16663	3.28597	2.57082	0.457599
BMP8A	6.2852	6.7068	4.97691	4.41184	13.4002	0	20.918	9.0899	3.71243	13.0361
OXCT2P1	6.2852	12.5752	2.48846	2.30666	1.9989	0.555285	3.47956	0	1.49891	1.3728
AL365277.1	2.69366	7.54515	9.69034	11.0569	13.7177	9.11546	15.1865	11.1258	19.9943	23.574
PPIEL	0	0	1.34596	1.71163	3.50879	1.66585	1.71944	2.66091	8.13947	5.07301
PABPC4	3211.74	3601.55	2584.87	2210.78	2856.21	2651.04	1784.55	1990.58	2764.29	2603.54
AL365277.2	4.48943	14.2519	14.6255	10.846	8.65614	6.44507	4.09338	9.57201	11.8548	3.29516
SNORA55	3.59154	1.6767	2.97883	4.27438	10.2518	8.33555	4.66653	8.62555	3.35806	5.15183
HEYL	173.292	128.267	123.215	83.5442	134.054	104.6	22.105	143.546	66.6322	170.814
AL035404.2	0	0	0.795574	0.787087	0	0.667597	0	0	0.357303	0
NT5C1A	0	0	0	0.393543	0	0	0	0	4.35733	0
HPCAL4	17.0598	21.7971	4.81517	3.09375	1.95601	3.33799	2.3536	0.625053	154.4	0.470737
PPIE	395.968	440.972	517.939	486.663	404.136	398.696	390.7	304.217	371.52	300.952
AL035404.1	0	0	0	0	0	0	0	0	0	0
RNU7.121P	0	0	0	0	0	0	0	0	0	0
BMP8B	32.3239	31.8573	37.7389	39.7686	43.4951	13.7824	48.9172	23.0195	21.9261	14.3564
OXCT2	15.2641	12.5752	1.93807	3.61533	4.16934	0.667597	4.68686	0	1.21424	1.38594
AL033527.3	0	3.3534	1.24423	0	0.489003	1.11057	0	0	0	0
AL033527.1	0	0	0	0	0	0	0	0	0.357303	0
AL033527.5	0	0.838349	0.34692	0	0.531889	0	0.593484	0	0.357303	0.470737
AL033527.4	0	0	0	0	0	0	0	0	0	0
TRIT1	462.411	430.912	373.163	381.931	353.863	332.124	314.377	280.627	329.388	209.176
Y_RNA.18	4.48943	1.6767	0	0.393543	0	1.66585	0.573148	0.625053	1.71388	0.941474
MYCL	595.298	501.333	383.088	295.395	650.308	280.233	279.15	77.7196	91.5649	144.153
AL033527.2	0.897886	0	0.795574	0.393543	0	0.555285	1.18697	0.785755	0	0
Y_RNA.19	0	0	0	0	0	0	0	0	0	0
MFSD2A	272.059	257.373	86.8742	82.2657	69.8239	80.367	10.459	88.5595	19.849	94.6378
AL663070.1	16.1619	13.4136	7.81229	5.19892	3.46591	6.22672	2.33326	5.01818	1.71388	6.51149
CAP1	2966.61	3156.39	1814.31	1671.31	1886.81	2810.46	2670.05	4283.93	767.34	3926.4
PPT1	3379.64	3395.32	2486.38	2097.87	1866.45	1833.38	1268.04	1255.91	704.714	1454.34
AL512599.1	0	0	0	0	0	0	0	0	0	0
RLF	1124.15	1242.43	1074.91	952.028	1293.88	916.861	1241.44	1481.01	1899.26	1203.36
RNU6.1237P	0	0	1.48941	0.393543	3.01979	2.44576	1.76012	0.625053	3.35806	2.34055
TMCO2	0	0	0	0	0.531889	0	0	0	0.357303	0.941474
AL050341.2	29.6302	50.301	78.7435	77.1026	64.1875	54.9174	76.3229	52.1999	151.844	57.0861
ZMPSTE24	876.336	712.597	501.681	494.579	503.463	536.152	713.45	932.671	270.18	935.435
AL050341.1	0	1.6767	0.897307	1.11661	0.489003	1.77817	1.71944	0.625053	2.28615	2.32741
COL9A2	82.6055	61.1995	2835.85	351.766	1231.87	311.579	81.1317	50.6106	15.1403	85.3413
AL031985.2	0	0	0	0.393543	0.531889	0	0.573148	0	0.499638	0.470737
SMAP2	170.598	128.267	227.143	237.798	281.432	307.904	458.551	417.814	337.734	303.305
AL031985.1	0	0	0	0	0	0	0	0	0	0.457599
AL031985.4	0	0	0.795574	0.393543	0	0	0	0.625053	0	0.928336
ZFP69B	405.844	291.746	129.897	108.46	109.621	121.733	70.7744	112.508	48.9938	132.176
AL031985.3	288.221	232.223	129	118.922	109.467	121.502	64.3274	103.436	54.7136	131.824
AL603839.4	10.7746	7.54515	6.54977	7.75224	10.7837	7.78026	1.18697	4.39313	4.00003	5.07301
ZFP69	160.722	163.478	139.356	110.703	137.391	104.388	83.9568	94.6316	117.628	102.535
AL603839.3	4.48943	0.838349	3.28403	8.80483	6.74301	2.33345	2.90641	2.82162	13.1388	3.22947
EXO5	148.151	115.692	170.952	157.512	159.233	149.41	114.167	115.633	99.4227	93.8277
AL603839.1	0	0	0	0.723066	0	0	0.593484	0	0	0.457599
AL603839.2	8.97886	1.6767	11.7301	8.15521	8.16713	13.4517	8.78024	7.37544	4.5723	6.99537
ZNF684	100.563	61.1995	55.4501	45.0862	58.5768	53.0269	68.2784	58.272	107.841	65.8331
AL356379.1	0	0	0	0	0	0	0	0	2.57082	0.457599
GTF2F2P2	0	0	0	0	0	0	0	0	0.714605	0
RIMS3	2119.01	2241.75	827.74	516.342	620.102	1055.48	767.871	775.679	1884.78	852.513
AL031289.1	3.59154	2.51505	2.0398	1.18063	1.59567	1.22288	2.90641	0	5.49894	0.470737
NFYC.AS1	28.7323	34.3723	53.979	36.7672	29.563	21.4566	25.7066	9.71495	78.4174	25.5752
NFYC	1792.18	1493.94	813.321	991.936	957.974	984.756	1169.45	905.098	1764.27	947.282
MIR30E	0	0	0.34692	0	0.531889	0.667597	0	0	1.21424	0.457599
MIR30C1	0	0	0	0.393543	0	0	0	0.785755	0	0
KCNQ4	125.704	156.771	64.058	75.18	82.289	74.1402	50.779	168.887	47.062	45.0309
RN7SL326P	0	0	0	1.18063	0	1.11057	0	0.785755	1.21424	0
CITED4	64.6478	73.7748	150.202	96.5727	169.039	79.818	386.688	64.7187	590.429	73.2992
AC119677.1	0	0	0	0	0	0.667597	0	0	0	0
AL391730.1	0	0	0	0	0	0	0	0	0.999275	0
UBE2V1P8	0	0	0	0	0	0	0	0.625053	0	0
CTPS1	1425.84	1430.22	1286.91	969.622	1259.11	1424.49	856.409	1098.33	376.45	1135.57
SLFNL1.AS1	52.9753	56.1694	60.3905	63.6844	73.5471	57.0262	52.9495	52.1821	60.3519	45.5673
SLFNL1	33.2218	34.3723	49.8577	31.7415	51.851	27.7893	29.7796	38.5562	45.2087	32.0079
SCMH1	394.172	403.246	703.225	400.294	1438.14	875.421	1696.45	540.894	1365.85	505.667
RPL23AP17	0	0.838349	1.59115	2.56274	5.19023	0.555285	3.52023	1.41081	3.78506	0.457599
AC093151.3	0	0	0	0	1.46701	0	3.54057	0	6.21355	0
AC093151.1	0	0	0	0	0	0	0	0	0.357303	0
FOXO6	36.8133	44.4325	14.9124	82.3938	35.4739	18.8985	42.1411	12.2329	144.965	47.332
AC093151.2	0	0	0.795574	1.05259	0	1.11057	0	2.35726	3.14309	0
RNA5SP45	0	0	0	0	0	0	0	0	0	0
EDN2	0	0.838349	1.69288	2.1692	4.9758	2.88874	9.37372	7.82204	13.8563	10.643
HIVEP3	15.2641	10.8985	22.0909	106.281	41.1102	235.567	76.957	926.063	105.767	304.766
AL445933.2	0	0	0	0.988568	0	0.667597	0.573148	3.92877	0.357303	2.34055
AL445933.1	0	0	0.448654	9.2624	0.489003	1.77817	8.08508	13.7867	6.85552	8.35503
HNRNPFP1	0	0	0	0	0	0	0	0	0	0
AC114492.1	0	0	0	0	0	0	0	0	0	0.470737
GUCA2B	0	0	0	0	0	0	4.13405	0	0	0.470737
GUCA2A	0	0	0	1.18063	1.59567	0	4.66653	0	0	0
FOXJ3	2396.46	2310.49	2061.48	2791.88	2778.08	2256.08	2161.47	2016.35	2856.25	1954.28
AC096540.1	0	1.6767	2.97883	9.00631	1.46701	0	1.16663	0.625053	2.78579	1.38594
RIMKLA	454.33	665.649	68.696	169.45	51.2763	41.684	319.921	26.5017	1077.91	141.944
AL513331.1	0	0.838349	0	1.11661	0	0	1.1463	0	0.357303	0
ZMYND12	26.9366	11.7369	8.40439	33.2064	8.08136	4.77921	5.21934	1.57151	26.998	2.81128
PPCS	211.003	186.952	306.353	277.782	219.449	200.746	342.868	186.156	429.017	212.182
CCDC30	13.4683	30.1806	41.5733	145.046	35.817	53.4636	46.6449	41.5207	104.843	32.0342
AL445669.1	0	0	0	1.38211	0	0	0	0	0.85694	0.941474
TMSB4XP1	0	0.838349	0	0.329523	0	0	0	2.03586	0	0
RNU6.536P	0	0	0.448654	0.329523	0	0	0.593484	0	0	0
AL445669.2	0	0	1.14249	3.22179	0	0.555285	0	2.66091	0.714605	0.457599
PPIH	279.242	295.937	365.369	300.37	318.261	279.11	251.562	176.923	167.257	209.817
AC098484.2	0.897886	5.0301	2.63191	5.1349	1.46701	1.11057	2.31293	1.25011	1.07191	1.85667
YBX1	13382.1	13678.5	9429.4	7974.69	7476.69	8227.02	10303.2	7346.61	9001.01	8022.62
CLDN19	519.876	497.141	575.237	622.133	385.949	136.289	176.324	48.4141	52.985	59.4924
P3H1	947.269	895.357	1319.14	995.993	1146.68	1332.8	1501.76	3813.74	773.73	4015.41
C1orf50	17.9577	9.22184	15.5045	32.0164	19.8859	12.5595	33.873	24.4658	27.2101	26.0328
AC098484.3	0	0	1.7346	0	0	0.667597	0	0.625053	0.499638	0.457599
AC098484.1	38.6091	48.6243	26.9478	29.8472	37.3441	37.5724	51.3318	38.8598	47.9248	38.5325
TMEM269	19.7535	20.9587	19.2189	20.9595	30.0949	17.5633	27.304	7.67909	24.9298	11.6765
SVBP	135.581	123.237	189.453	156.668	113.791	114.601	137.602	111.829	101.197	95.6055
ERMAP	105.053	106.47	157.085	113.889	92.2835	69.4733	114.066	100.649	228.908	181.144
AL512353.1	17.9577	20.9587	9.69034	18.6623	6.12535	7.89257	9.37372	8.62555	17.4961	14.4221
ZNF691	410.334	387.317	257.99	243.052	176.7	139.29	155.674	123.473	189.474	212.639
AL512353.2	4.48943	5.86845	5.91594	6.37013	3.01979	1.11057	0	1.25011	1.42921	0
AL512353.3	0	0	0.34692	0.393543	0	0	1.1463	2.19656	0.714605	0
ATP6V1E1P1	0	0	1.79461	0.723066	1.50989	0.667597	2.33326	0.785755	1.35658	0.915199
SLC2A1	3455.96	3972.1	2076.41	1802.36	1811.35	1956.53	4228.59	10884.7	5360.78	5616.23
AC099795.2	1.79577	7.54515	1.14249	3.34983	4.04068	4.22393	4.64619	11.1258	5.21427	2.81128
SLC2A1.AS1	49.3837	51.9777	30.5422	38.524	20.9926	25.7928	33.2592	37.9134	155.833	33.9434
AC099795.1	6.2852	6.7068	4.46824	4.3384	2.08467	6.0021	5.83316	3.28597	27.4947	5.59629
RNU6.880P	1.79577	0	0.34692	1.57417	1.02089	2.00279	0	0.785755	1.71388	0.457599
U6.1	0	0	0	0	0	0	0	0	0	0
AL161637.1	0	0	0	0.329523	0	0.555285	0	0	0	0
FAM183A	13.4683	24.3121	31.0742	82.0831	29.7774	20.2211	14.0199	17.394	20.7845	15.2847
EBNA1BP2	663.537	639.661	375.007	374.708	295.287	508.094	601.551	611.184	188.042	388.123
MIR6733	0	0	0	0	0	0	0	0	0	0
CFAP57	15.2641	19.282	29.2328	136.774	23.2488	22.2302	16.2718	14.4117	9.85628	13.52
RNA5SP46	0	0	0.34692	0.393543	0.531889	0	0	0	0	0.470737
TMEM125	454.33	541.574	181.634	268.293	272.69	87.255	276.963	64.2544	64.3402	117.649
C1orf210	290.915	277.494	44.8939	81.6726	55.4885	18.7862	90.7939	15.0368	8.99934	31.1584
TIE1	70.0351	45.2709	22.2161	22.5431	41.5992	67.5829	77.201	62.808	37.993	42.2853
MPL	9.87674	14.2519	7.75227	7.36812	7.2749	5.88978	8.78024	7.37544	8.06977	5.59629
AL139289.2	15.2641	10.0602	5.61074	4.924	5.4648	5.44681	1.1463	5.01818	4.92667	4.65482
CDC20	3064.48	3516.88	2195.99	1281.26	3316.02	2397.23	1222.69	1281.32	300.446	1421.66
ELOVL1	356.461	346.238	333.768	269.689	395.548	564.79	922.867	862.219	312.237	655.966
MIR6734	0	0	0	0	0	0	0	0	0	0
MED8	211.901	220.486	154.166	133.933	190.332	224.754	332.612	403.796	305.887	389.144
AL139289.1	7.18308	5.86845	3.4875	5.84855	2.04178	7.66795	8.14608	19.2692	6.42852	12.9442
SZT2	719.206	625.409	1234.77	1392.85	1122.58	1106.59	1275.12	1533.25	1381.82	1264.37
SZT2.AS1	0.897886	0	0.693841	0	0	0	0	0	0	0
MIR6735	0	0	0	0	0	0	0	0	0	0
HYI	0	0	0	0	0	0	0	0	0	0
HYI.AS1	0	0.838349	0.448654	0.988568	0.489003	1.77817	1.1463	8.7685	1.71388	3.25575
PTPRF	16101.8	17901.3	14052.5	14275.4	14903.5	11925.8	12508.7	11301.5	3921.33	7813.46
KDM4A	5230.18	4812.96	1478.4	1621.58	1381.33	1571.18	1202.09	2039.1	1120.03	2705.79
KDM4A.AS1	14.3662	18.4437	22.0543	28.2636	17.2265	21.4566	13.4264	26.6446	20.0699	27.9158
ST3GAL3	70.0351	95.5718	201.079	186.575	183.546	390.093	270.045	247.231	457.705	185.694
AL451062.1	0.897886	0	1.59115	0.393543	0	2.55808	0.573148	1.41081	1.57155	0
U6.2	0	0	0.693841	0	0.489003	0.667597	0	1.87516	3.14309	0
AL451062.2	0	0	1.14249	1.11661	1.02089	5.3345	1.73978	2.35726	5.85625	2.30113
MIR6079	0	0	0.448654	0	0	0	0	1.57151	0	0
SHMT1P1	5.38731	2.51505	6.05939	6.04061	1.50989	6.11441	4.05271	5.33958	9.28401	3.71335
ARTN	127.5	135.813	18.9503	41.4991	22.5883	17.008	22.7391	30.395	9.64131	30.6088
AL357079.1	3.59154	5.86845	0.795574	1.38211	1.9989	1.11057	0.573148	0.785755	3.07046	1.39907
IPO13	1099.91	1009.37	691.163	733.119	736.235	785.47	1104.78	886.221	788.789	976.45
DPH2	1343.24	1241.6	665.895	649.033	459.453	557.796	495.9	515.839	491.634	699.379
ATP6V0B	417.517	409.115	701.813	660.451	617.502	454.194	946.878	449.692	587.714	499.822
B4GALT2	882.622	1021.11	1518.35	1164.09	1123.51	1174.2	1029.48	825.094	609.253	883.264
CCDC24	198.433	225.516	196.071	314.025	142.942	121.271	167.3	91.8277	95.2715	95.5136
SLC6A9	1541.67	1047.1	299.871	274.537	220.127	229.777	301.235	353.007	172.326	443.079
AL139220.2	17.0598	14.2519	4.9169	6.24209	11.7188	7.33729	12.2191	2.98232	19.425	3.26888
AL139220.1	0	0	0	0	0.489003	0	0.573148	0	0.499638	0
KRT8P47	0	0	0	0	0	0	0	0	0	0
RN7SL479P	0	0	0	0	0.531889	0	0	0	0	0
KLF17	4.48943	0	0	0	0.489003	0	0	0.625053	0.357303	2.81128
AL356653.1	0	4.19175	2.83538	4.08231	2.04178	1.33519	0.593484	2.19656	0	4.15781
KLF18	18.8556	8.38349	0	1.38211	0	1.22288	0	0	0.714605	4.64168
AL359839.1	0	0	0	0	0	0.667597	0	0	0	0.470737
Y_RNA.20	0	0	0	0	0	0	0	0	0	0
OOSP1P1	0	0	0	0	0	0	0	0	0	0
AL035417.1	0	0	0	0	0	0	0	0	0	0
AL035417.2	0.897886	0	1.34596	0.659045	0.978006	1.22288	1.71944	0	1.71388	0.470737
DMAP1	756.02	687.447	708.048	733.859	843.368	613.156	763.668	617.989	546.638	603.287
ERI3	984.083	1001.83	933.508	969.792	923.89	831.99	864.023	679.69	764.577	736.131
ERI3.IT1	14.3662	22.6354	16.1384	22.2964	9.05937	7.66795	12.7923	11.5901	32.8543	20.0184
RNU6.369P	0	0	0	0	0	0	0	0	0	0
RNF220	2003.18	1794.91	1533.15	1641.54	1161.85	967.211	893.27	862.612	532.921	887.501
MIR5584	0	0	0	0	0	0	0	0.785755	0.499638	0
TMEM53	210.105	161.801	192.396	164.688	107.854	121.502	161.975	125.009	154.197	93.0942
C1orf228	10.7746	8.38349	43.9783	111.599	27.4354	34.2407	21.5115	35.6094	25.7111	9.33591
RNU5F.1	0	0	0	0.988568	0.531889	0	0	1.87516	1.07191	0
RNU5D.1	0	0	0.448654	0	0	0	0.593484	0	0	0
KIF2C	1666.48	1846.05	1341.7	797.762	1815.97	1432.19	733.201	730.622	257.387	692.158
AL592166.1	8.97886	4.19175	3.1823	8.93287	7.10335	5.55912	6.44698	5.48253	0	3.24261
RPS8	13115.4	14511	16409	12863.9	10261.1	8935.21	7457.96	5971.91	9032.54	7021.89
SNORD55	0	0	0	0	0	0	0	0	0	0
SNORD46	3.59154	6.7068	3.38576	6.05003	2.04178	6.11441	8.7599	4.85748	1.92885	2.32741
SNORD38A	0.897886	0	1.59115	1.83968	1.9989	2.44576	1.73978	2.66091	2.07118	0.928336
SNORD38B	0	0	0	0	0	0	0	0	0	0
SNORD38B.1	0	0	0	0	0	0	0	0	0	0
RPS15AP11	0	0	1.14249	2.10518	3.68033	1.33519	1.18697	2.03586	1.35658	3.26888
BEST4	14.3662	15.9286	10.7911	42.4425	9.2738	10.3321	7.61361	6.26828	4.642	4.17095
PLK3	227.165	220.486	105.793	150.471	161.678	311.916	263.476	507.088	102.839	491.432
TCTEX1D4	0	1.6767	1.93807	10.1418	1.59567	4.89153	4.09338	19.8765	2.42849	21.7568
BTBD19	21.5493	5.0301	37.7389	88.086	38.1762	82.5881	49.1002	239.302	49.7752	378.853
PTCH2	22.4471	28.5039	80.7182	229.206	73.0581	51.5794	34.4055	66.7546	31.1375	43.6318
RNU5E.6P	0	0	0	0	0	0	0	0	0	0
AL136380.1	0	0.838349	0.34692	1.71163	1.59567	1.11057	1.18697	0	0.357303	0.457599
EIF2B3	360.95	328.633	334.292	279.544	309.991	333.372	444.897	313.003	339.941	319.098
RNA5SP47	0	0	0	0.659045	1.06378	0	0	0	0.357303	1.38594
CCNB1IP1P1	0	0	1.38768	1.11661	0.531889	0.667597	0	0	0.714605	0
PPIAP35	1.79577	0	0.795574	0.393543	0	0	0.593484	0	1.35658	0.457599
MRPS17P1	0.897886	0	0.693841	0.988568	3.06267	1.11057	1.73978	0.785755	3.8577	1.41221
HECTD3	1584.77	1509.87	1299.29	1264.37	1020.13	1026.64	1269.54	974.37	688.161	981.567
UROD	1095.42	933.083	1041.1	880.813	755.125	899.853	1014.62	616.488	671.226	745.334
ZSWIM5	83.5034	54.4927	301.113	283.745	179.214	275.685	317.466	253.642	289.89	283.692
OSTCP5	0	0	1.04076	0	1.50989	0	0	0.625053	0.999275	1.85667
LINC01144	12.5704	0	9.85209	6.97458	6.12535	9.22149	6.50799	2.82162	13.9957	3.72648
HPDL	219.084	223.001	188.895	226.041	47.8104	55.1483	37.3525	31.3237	27.3524	60.3813
MUTYH	1292.96	1275.97	704.354	686.288	455.644	431.533	268.451	243.82	165.907	365.894
TOE1	404.049	284.2	247.225	219.387	167.829	202.1	139.545	146.261	81.7754	122.07
TESK2	422.006	358.814	296.141	354.543	331.704	217.317	237.704	91.1671	147.478	147.958
PPIAP36	0	0	2.38672	2.7002	0	1.33519	0.573148	1.41081	0.499638	1.41221
CCDC163	73.6266	49.4626	82.8649	63.2909	63.5698	87.0367	55.8763	54.8608	35.3495	54.2748
MMACHC	136.479	176.892	147.108	150.381	175.765	167.946	154.63	123.134	251.191	152.77
PRDX1	1668.27	1790.71	2156.63	1707.11	1690.77	1696.97	2437.95	2819.6	943.739	2140.92
HMGB1P48	0	0	0.34692	0	0	0	0	0	0	0
AKR1A1	1788.59	2084.14	1962.47	1602.15	1688.07	1277.29	1316.58	1156.95	1408.84	1357.53
AL355480.3	0	0	0	1.57417	0.489003	0.667597	0	1.41081	1.35658	0.470737
AL355480.1	0	0	1.59115	1.11661	3.01979	0	0.593484	1.41081	2.35585	0.941474
NASP	6671.29	7546.82	7066.2	5497.08	5324.28	5774.76	3006.31	4414.16	1827.4	4441.35
AL355480.2	0	0	0	0	0	0	0	0	0	0
AL355480.4	0.897886	0.838349	0.897307	0.329523	0.489003	0.555285	0	1.57151	0	0.928336
CCDC17	18.8556	25.1505	11.7301	31.2199	29.2455	19.8968	47.8116	38.8598	24.9268	31.5766
GPBP1L1	2119.01	2150.37	1544.62	1376.34	1720.03	1522.61	1555.61	1498.62	1797.29	1875.2
RPS15AP10	6.2852	2.51505	10.7911	12.2921	7.7639	3.11336	4.66653	12.5366	23.213	12.9442
AL604028.2	14.3662	15.9286	19.5058	18.2047	11.6759	14.6746	19.2596	8.9292	26.7801	22.1487
TMEM69	650.069	683.255	448.956	438.615	464.145	444.074	522.509	499.784	580.637	425.22
IPP	119.419	147.55	238.101	214.139	277.125	253.217	279.646	245.892	455.373	288.581
AL604028.1	2.69366	3.3534	6.6515	8.53933	7.50659	10.6753	8.73957	10.1971	12.8541	13.9382
AL603882.1	0	0	0	0	0	0.555285	0	0	0	0
MAST2	2057.06	1886.29	2015.64	1751.37	2526.95	2512.37	2430.93	2040.35	3188.79	2023.45
TMA16P2	0	0	0.34692	0.393543	0.489003	0	0	0	0	0
PIK3R3	267.57	238.93	252.856	275.37	239.052	564.584	254.838	1429.38	360.601	737.112
AL358075.4	0	0	0	0	0	0	0	0	0	0
AL358075.1	0	0	0	0	2.53079	0.667597	1.1463	0.625053	2.35585	0.457599
AL358075.3	0	0	0	0.393543	0.489003	2.00279	0.593484	0	0	0.470737
AL358075.2	0	0	0.448654	0.723066	0	0.555285	0.573148	0	1.85622	0.470737
TSPAN1	1.79577	0.838349	11.1798	7.95373	11.7617	9.44611	7.61361	5.64323	12.9267	6.01448
AL672043.1	0	0	0	0	0.489003	0	0	0	0	0
POMGNT1	1118.77	932.245	1730.02	1548.76	1555.35	1461.53	1754.96	1030.2	2386.53	1445.84
LURAP1	65.5457	41.0791	38.7614	30.945	25.9684	25.4496	50.4536	19.7691	344.232	28.2551
RAD54L	489.348	527.322	589.171	356.005	438.409	428.539	223.868	241.945	75.7101	297.302
LRRC41	2060.65	1914.79	2936.96	2237.55	2611.03	2339.57	2931.28	2446.79	3585.23	2446.48
UQCRH	568.362	591.875	1135.46	918.526	879.777	705.752	1635.78	841.664	1481.61	782.885
NSUN4	648.273	514.747	431.49	431.461	387.664	467.453	448.072	435.19	569.148	408.729
AL122001.1	0	1.6767	1.04076	1.38211	0.489003	0.667597	2.33326	1.41081	1.35658	0.915199
FAAH	254.102	137.489	254.813	204.961	262.447	54.6927	171.047	42.3065	144.544	65.7936
FAAHP1	0.897886	2.51505	9.40343	6.04061	7.06047	2.22114	3.52023	1.25011	5.14164	4.60227
LINC01398	0.897886	0	6.87326	1.05259	0.531889	0	1.18697	0	0	0.457599
DMBX1	0.897886	2.51505	333.247	37.0665	114.932	137.936	19.8531	10.34	0.357303	12.0421
AL136373.1	0	0	0	0.393543	0	0	0	0	0	0.457599
MKNK1.AS1	8.08097	6.7068	7.794	9.33584	2.53079	7.11266	2.33326	3.60737	9.42634	7.89743
KNCN	0	0	0	2.7002	0	0	0	3.28597	0	0
MKNK1	403.151	276.655	236.596	360.72	207.095	253.224	362.127	277.483	284.098	247.474
MOB3C	131.091	71.2597	71.0747	203.447	50.2381	90.2435	65.8842	91.6848	173.683	101.097
ATPAF1	1315.4	1415.97	1042.88	1383.26	1555.45	1083.09	1414.23	698.352	1660.43	986.338
NENFP1	2.69366	0	0.448654	1.44613	4.12645	1.89048	0	4.07172	2.71316	3.70021
TEX38	1.79577	0.838349	5.01863	10.3244	4.52968	7.66795	7.02013	7.67909	4.78727	3.24261
EFCAB14.AS1	8.97886	6.7068	7.71055	22.287	12.5253	4.77921	7.57294	12.3759	8.1424	8.31562
EFCAB14	1600.93	1482.2	1242.58	2687.7	1415.2	1504.46	1725.11	1945.72	2162.32	1874.97
AL593856.1	0	0	0	0	0.489003	0	0	0	0	0
CYP4B1	4.48943	0.838349	3.93615	1.31809	15.442	1.89048	3.49989	0.625053	0.499638	1.39907
CYP4Z2P	0	0.838349	0	0	0.531889	1.33519	0	0	1.21424	0.457599
AL731892.1	0	0	0.795574	0.393543	2.04178	0	0.573148	0	0	0
CYP4A11	0	0	0.897307	0	6.08246	0.555285	0	0	0	0
CYP4A26P	0	0	0	0	0	0	0	0	0	0
CYP4A43P	0	0	0	0	0	0	0	0	0	0
CYP4A27P	0	0	0	0	0	0	0	0	0	0
CYP4A44P	0	0	0	0	0	0	0	0	0	0
CYP4X1	28.7323	49.4626	32.1282	24.7217	155.725	10.8936	87.8875	20.2157	1.21424	31.1584
CYP4Z1	1.79577	2.51505	2.28499	3.08433	2.57367	0.667597	0.573148	0	1.21424	2.31427
AL450996.1	0	0	0	1.51015	0	0	0	0	0	0.470737
CYP4A22.AS1	14.3662	15.9286	16.2584	15.5873	8.16713	8.00489	4.72753	5.32183	0.999275	16.1605
CYP4A22	3.59154	1.6767	1.83634	2.1692	0.978006	2.44576	0	0.785755	0.714605	1.84354
MTND1P34	0	0	0	0.393543	0	0	1.18697	0	0.499638	0
LINC00853	3.59154	1.6767	2.28499	0.393543	1.06378	1.11057	0	0	0.499638	0.470737
PDZK1IP1	0	0.838349	0	0	1.50989	1.11057	0	0	0.499638	0
TAL1	1.79577	2.51505	8.66787	3.28581	56.7667	0	37.1085	4.07172	4.71464	2.32741
AL135960.1	0	0	0	0	0.531889	0	1.73978	0	0	0
STIL	1403.4	1219.8	812.027	585.52	1227.74	961.521	521.874	857.952	131.838	654.201
CMPK1	321.443	357.975	482.999	465.34	696.368	877.892	1081.63	1896.7	1029.41	1599.52
LINC01389	0	0	1.48941	1.44613	4.12645	3.88699	7.65428	10.1971	3.28543	0.915199
FOXE3	0	0	0.448654	0.393543	1.59567	1.33519	1.76012	3.14302	0.499638	0.457599
FOXD2.AS1	5.38731	0	40.0473	19.4588	16.6345	18.4618	5.30068	8.14344	3.64273	13.4937
FOXD2	0	0	20.0328	8.08177	3.63745	12.4472	1.18697	5.01818	0.357303	8.34189
AL356458.1	0	0	0	0	0	0	0	0	0	0
RPL21P24	0	0	0	0	0	0	0	0.785755	0	0.470737
ATP6V0E1P4	0	0	0	0	0	0	0	0	0	0.470737
LINC01738	0	0	0	2.89226	0.978006	4.22393	0.593484	1.41081	0	0
TRABD2B	127.5	117.369	465.974	550.801	307.469	505.674	168.897	85.7556	105.2	123.103
AL691459.1	0	0	0	0	0	0	0	0	0	0
AC096541.1	0.897886	1.6767	1.34596	9.27182	5.37903	3.55633	2.3536	0.625053	0.357303	4.58913
AL356289.1	0	0	4.32479	4.59448	5.55057	4.11162	0.593484	0.625053	3.21572	0.941474
AL356289.2	0	0	0.795574	0.393543	0	0	0	1.41081	0	0
CYP46A4P	0	0	0.897307	1.18063	1.55278	0.667597	0	0	0.85694	0
SKINT1L	1.79577	7.54515	36.8782	39.586	12.5682	18.7862	4.09338	11.7508	5.85625	6.49836
AL356289.3	0.897886	0	15.6846	17.5456	3.72322	5.10987	1.76012	1.87516	0.85694	4.18408
AL109659.1	1.79577	1.6767	7.95574	8.74081	4.16934	3.22567	0.593484	2.66091	2.50112	0.941474
SLC5A9	18.8556	9.22184	296.382	419.987	160.194	58.4737	59.5389	37.592	18.6407	52.8495
AL109659.2	0	0.838349	22.4978	34.4417	5.63635	5.11615	8.14608	4.37537	3.71243	6.96909
AL109659.3	0	0	0	0.787087	0.531889	0	2.31293	0.625053	0.499638	0
SPATA6	320.545	245.636	885.158	841.692	382.32	682.561	234.635	355.917	171.757	248.271
PPP1R8P1	0	1.6767	1.38768	0.393543	0	3.66864	1.71944	0	1.21424	0.457599
RNU6.723P	0	0	1.69288	1.18063	0	0.555285	0	0	0.85694	0.457599
AL356968.2	21.5493	22.6354	6.56806	5.85797	6.21112	6.0021	7.02013	5.16113	14.6435	6.92968
RNU4.61P	0	0	0	0.393543	0	0	0.573148	0.785755	0	0
AL356968.1	0	0	0	0.393543	0	0	0	0	0	0
AGBL4	22.4471	37.7257	28.7607	79.7953	32.7972	36.9111	19.8124	23.1802	5.78655	20.881
BEND5	87.0949	72.9364	87.3931	81.8533	103.985	76.6858	97.3832	61.5757	87.6287	48.7836
AC092264.1	0	0	0.897307	2.49872	0.489003	1.33519	0	0.625053	0.357303	1.38594
AL590432.1	0	0	0	0	0	0	0	0	0	0
AGBL4.IT1	0	0	0	0	0	0	0	0	0.357303	0
AL390023.1	0	0	0	1.31809	0	0	0	0	0	0
ZNF859P	0	0	0	0.659045	0	1.33519	0	0	0	0.457599
AL645730.1	0	0	0	0	0	0	0	0	0.499638	0
MTND2P29	0	0	0.448654	0	0	0	0	0.625053	0	0
ELAVL4	15.2641	35.2107	29.598	17.6191	43.1091	1.89048	12.2395	1.57151	1.42921	6.04076
AL583843.1	0	0.838349	0	0.329523	0	0.555285	0	0	0.357303	0
AL592182.2	0	0	0	0	0.489003	0	0	0	0	0.941474
AL592182.1	0	0	0	0.393543	0	0	0	0	0	0
AL596275.2	0	0	0	0	0.489003	0	0	0	0	0
AL592182.3	0	0	0	0	0	0	0	0	0	0
AL596275.1	0	0	2.0398	1.83968	0.489003	0	1.71944	1.41081	4.215	0
HMGB1P45	0	0	0	0	0.489003	0	0	0	0	0.470737
FCF1P6	0.897886	0	0	0	1.02089	0	0	0	0.357303	0
DMRTA2	1.79577	0	78.8716	2.62676	2.9769	1.89048	0.573148	0	0	2.34055
AL049637.2	0	0	0	0	0	0	0	0	0	0.457599
FAF1	1042.45	1083.15	756.997	661.924	858.141	807.02	868.856	658.92	926.638	687.832
AL049637.1	2.69366	4.19175	5.46729	4.66792	5.14734	8.1172	4.66653	10.3578	12.9267	6.49836
RNU6.1026P	0	0	0	0	0.531889	0.667597	0	0	0.714605	0.915199
PHBP12	6.2852	5.0301	1.04076	2.56274	2.04178	4.44855	1.76012	0.625053	10.995	4.14467
MRPS6P2	0.897886	0	0.795574	0.329523	0.978006	0	0	0	0.714605	0
CDKN2C	0	0	0	0	5.63635	4.89153	2.86574	11.4472	14.4983	9.74096
MIR4421	0	0	0	0	0	0	0	0	0	0
MIR6500	0	0	0	0	0	0	0	0	0.499638	0.470737
C1orf185	0	0	0	0	0	0	0	0	0	0
Y_RNA.21	0	0	0	0	0	0	0	0	0	0
CFL1P2	0	0	0	0	0	0	0	1.25011	0	0.470737
LINC01562	0	0	1.59115	0	1.50989	1.33519	0.593484	0	1.78651	0.470737
RNF11	780.263	814.876	1249.29	1191.01	1497.07	1314.49	2185.02	2059.82	1926.65	2160.55
AL162430.1	12.5704	19.282	30.417	36.9235	19.3541	23.79	30.8039	25.3945	13.5687	14.3826
AL162430.2	0	0	0.34692	0.787087	4.57257	4.89153	1.76012	0	1.57155	1.41221
TTC39A	205.616	140.843	87.448	76.4078	134.964	44.4793	196.059	55.6288	505.642	68.4867
TTC39A.AS1	0	0	0	0	1.02089	1.11057	0	0	2.42849	0.470737
EPS15	2528.45	2295.4	898.385	913.125	1470.68	1645.07	2421.83	2312.67	3077.85	2419.73
AL671986.1	4.48943	5.0301	2.14153	3.14835	4.04068	2.44576	8.24777	10.0364	6.85552	8.78635
RNU6.877P	0	0	0.448654	0.393543	1.02089	0	0	0	1.35658	1.39907
AC104170.2	0	1.6767	0	0.393543	0	0	1.1463	1.41081	3.00076	0.457599
AC104170.1	0	0	0	0	0	0	2.29259	0	0.999275	0.457599
RNU6.1281P	0	0	0	0	0	0	0.593484	0	1.85622	0
CALR4P	0.897886	0	0	0	1.02089	0	5.32102	1.57151	23.5035	2.81128
OSBPL9	2292.3	2433.73	2274.22	2159.02	4612.85	2691.71	6835.3	5520.4	6464.08	5088.9
GAPDHP51	0	1.6767	0.34692	0	1.02089	0	1.73978	2.03586	1.35658	0.915199
SLC25A6P3	0	0.838349	0	1.38211	0.489003	0	0	0	0.357303	0.470737
SNORA26	0	0	0	0	0	0	0	0	0.357303	0
NRDC	3833.07	3831.26	2441.39	2289.56	2920.19	2493.54	3160.55	3621.86	3595.38	4157.39
AL050343.1	3.59154	2.51505	8.09919	14.5894	17.1407	17.1203	17.5605	43.735	12.857	34.0091
AL050343.2	0	1.6767	0	0.659045	0.531889	0.555285	1.1463	0	1.21424	1.38594
MIR761	0	0	0	0	0	0	0	0	0	0
TSEN15P2	1.79577	0	1.14249	1.11661	0.978006	0.555285	0	0	1.21424	2.79815
RAB3B	3331.16	3609.09	3521.18	12410.4	3149.27	3126.43	2719.67	6456.17	346.091	7171.29
RNA5SP48	0	1.6767	1.59115	9.53732	3.91202	1.66585	0	2.82162	0	1.84354
AL445685.2	0	0	0.795574	2.36126	1.06378	2.44576	0.593484	1.41081	0	0.470737
RN7SL290P	0	0	0	0	0	0	0	0	0	0
TXNDC12	1077.46	1091.53	817.367	669.608	758.3	759.128	903.404	991.818	530.784	1102.1
KTI12	130.193	121.561	144.8	117.724	102.432	133.706	111.464	122.848	88.5612	107.7
AL445685.1	3.59154	2.51505	1.14249	0.659045	3.99779	1.22288	0.573148	2.35726	1.07191	1.84354
TXNDC12.AS1	2.69366	0	0.34692	1.77565	1.02089	1.11057	2.37394	3.60737	3.9274	1.8304
BTF3L4	2326.42	2295.4	1259.52	1290.3	1568.78	1371.35	1473.29	1660.58	1815	1848.54
ZFYVE9	1668.27	1631.43	1468.1	1347.9	1457.65	1103.61	865.372	821.931	995.283	880.768
RN7SL788P	0	0	0	0	0	1.66585	0	0	1.21424	0.457599
AL139156.2	2.69366	1.6767	2.63191	3.67935	4.61545	0.555285	4.64619	3.44667	0	0
AL139156.1	2.69366	0	0.34692	0.723066	2.08467	0	0	0	0.714605	0.470737
PDCL3P6	0	0	0	0.659045	1.02089	0	1.73978	0.625053	0.714605	0
AL139156.3	0	0	0.693841	0.329523	0	0	0	0	0.85694	0
DNAJC19P7	0	0	0.448654	0.393543	1.02089	0	0	0	0.999275	0.457599
ANAPC10P1	0	0	1.34596	0.787087	0	1.11057	0.573148	0	0.714605	0
CC2D1B	342.094	292.584	537.605	536.912	470.7	529.114	513.521	545.966	321.67	454.362
AL513218.1	0	5.86845	2.83538	1.77565	2.53079	1.66585	2.3536	1.41081	1.85622	1.84354
PLA2G12AP1	7.18308	3.3534	3.4875	3.81681	3.01979	4.33624	3.45922	5.16113	5.28398	3.25575
ORC1	1268.71	1369.02	782.636	512.622	496.823	599.823	223.623	326.38	48.2066	496.41
PRPF38A	994.857	988.414	999.54	986.509	1051.14	1258.24	919.391	795.322	785.893	799.295
ZCCHC11	1536.28	1375.73	1780.39	1782.85	1760.57	2484.85	1591.23	3298.97	1934.62	1952.54
AL591167.1	0	2.51505	0.34692	2.29724	1.02089	1.89048	0	0	2.71316	0.470737
EEF1GP7	0	0	3.28403	3.55131	0	0.555285	0.573148	0.785755	0.357303	0.470737
GPX7	108.644	93.8951	156.219	132.095	39.7719	46.3635	26.7105	17.7155	27.7097	26.8823
FAM159A	2.69366	5.86845	8.64958	2.23322	5.42192	5.55912	2.90641	2.66091	0.714605	3.26888
COA7	784.752	777.988	481.671	412.236	388.462	472.163	251.358	376.901	355.747	454.073
NDUFS5P3	0	0	0	0	0	0	0	0	0	0
RN7SL62P	0	0	0	0	0	0	0.573148	0	0	0
ZYG11B	1211.25	1063.03	1236.82	1010.13	1474.24	1510.76	1946.71	1746.53	3559.75	1787.92
RNU2.30P	0	0	0	0	0	0	0	0	0.999275	0.457599
RPS13P2	1.79577	1.6767	2.28499	0.659045	2.08467	0.667597	0	0.785755	1.57155	1.41221
RNU6.969P	0	0	0.693841	0.393543	1.02089	1.11057	2.90641	0	0.357303	0.457599
ZYG11A	145.457	65.3913	34.7001	19.3947	27.0322	33.91	11.0932	59.0932	8.5694	199.84
AC099677.4	2.69366	0.838349	0.693841	0.723066	0.489003	1.11057	0.573148	0.625053	0.499638	3.22947
ECHDC2	384.295	361.329	435.633	447.97	520.861	92.9327	235.578	118.901	598.609	316.734
AC099677.1	17.0598	7.54515	9.64862	8.61277	7.72101	1.66585	4.68686	0	11.9275	2.77187
AC099677.2	0	0	0	0	0	0	0	0	2.07118	0.470737
SCP2	261.285	246.475	555.313	483.874	659.127	494.992	893.144	868.022	1705.96	747.992
MIR1273F	0.897886	0	0	0.393543	0.531889	0	0	0	1.85622	0
MIR5095	0	0	0	0	0	0	0	0	0	0
MIR1273G	0	0	0	0.659045	0	0	0	0	0	0
AC099677.3	0	0	0.693841	0.393543	0	0	0	0	0	0
AL445183.3	0.897886	0	1.48941	1.05259	0.978006	2.55808	0.573148	2.98232	0.714605	0.915199
TUBBP10	0	0	0	0	0	0	0	0.785755	0	0
PODN	11.6725	15.9286	128.969	64.061	249.732	79.1441	41.9987	292.217	210.171	113.988
AL445183.1	0	0	0	0	0	0	0	0	0	0
HIGD1AP11	0	0	0	0	0	0	0	0	0	0
SLC1A7	0	0	19.519	12.7497	29.9662	5.67144	2.3536	19.4654	33.136	2.81128
AL445183.2	0	0	3.38576	4.8694	5.10446	0.555285	0	1.57151	4.56937	1.85667
AL606760.4	0	0	0.448654	0	0	0	0	0	0.357303	0
CPT2	520.774	468.637	337.381	316.364	407.91	330.028	662.643	334.684	573.677	336.844
AL606760.2	5.38731	2.51505	2.73364	4.00887	2.4879	3.33171	1.73978	4.23242	1.49891	1.39907
C1orf123	385.193	449.355	641.762	565.281	471.996	391.933	370.375	353.167	401.452	358.283
AL606760.3	1.79577	0	1.14249	1.71163	1.46701	3.11336	3.52023	2.03586	12.1424	3.70021
MAGOH	82.6055	108.147	145.786	112.855	103.342	115.369	119.61	123.169	64.2735	92.2972
AL606760.1	2.69366	0	3.87614	2.56274	2.57367	1.77817	2.94708	6.10758	2.92812	3.25575
LRP8	3091.42	2832.78	1655.63	2109.2	286.124	658.74	324.307	773.374	347.389	909.128
AL355483.4	0	0	0	0	0	0	0	0	0	0
AL355483.2	3.59154	3.3534	2.59019	2.56274	0	0.667597	0	2.03586	1.85622	0.928336
AL355483.1	2.69366	3.3534	1.34596	1.31809	0.489003	0.555285	0.593484	1.57151	0	1.39907
AL355483.3	8.08097	16.767	4.9169	13.8757	0.489003	1.89048	1.1463	4.07172	1.71388	7.87115
LINC01771	18.8556	2.51505	1.14249	2.1692	0.489003	0	0	2.66091	0	1.38594
AC119428.1	0	0	0	0	0	0	0	0	0	0
AC119428.2	0	0	0.448654	0.988568	0	0	0	0	0	0
SLC25A3P1	8.08097	8.38349	4.87518	1.83968	0.489003	0	0	2.19656	0	8.3813
DMRTB1	3.59154	1.6767	0	0	0	0	0	0	0.357303	2.30113
GLIS1	5.38731	5.0301	109.401	117.167	9.14514	14.6683	4.11371	2.50021	1.35658	6.98223
RNU7.95P	0	0	0	0	0	0	0	0	0	0
NDC1	3506.24	3422.98	1965.59	1638.06	2089.59	1925.88	1378.92	1533.3	959.097	1826.08
SNORA58	1.79577	0	2.0398	1.83968	1.46701	0	0	0.625053	0	0
AL049745.1	0	0	0	0	0.489003	0	0	0.625053	0.357303	0.928336
YIPF1	449.841	509.716	397.072	398.344	312.925	383.067	406.028	342.702	341.176	435.05
DIO1	0	0.838349	6.05939	7.02918	4.04068	15.7851	4.09338	4.53607	1.21424	4.66796
HSPB11	79.9118	67.068	168.917	157.079	120.929	330.041	132.423	183.138	89.8511	113.441
LRRC42	553.098	630.439	721.757	618.85	568.191	1202.47	821.272	809.359	403.805	598.935
HNRNPA3P12	1.79577	0.838349	2.8771	1.38211	1.06378	3.55633	5.32102	4.39313	0.85694	1.3728
LDLRAD1	0	0	0	0	0	0	1.1463	0	1.35658	0
TMEM59	875.438	950.688	773.48	813.753	930.993	758.641	1528.72	1128.68	1321.12	1706.2
AL353898.3	4.48943	3.3534	4.67171	7.16664	5.55057	3.11336	2.90641	6.26828	11.4975	9.28336
TCEANC2	377.112	463.607	338.223	359.748	376.22	396.968	363.233	313.342	480.294	284.163
MIR4781	0	0	0	0	0	0	0	0	0	0
AL353898.1	0	2.51505	1.24423	0.329523	0.531889	1.89048	0	0.625053	0.357303	0
AL353898.2	0	0	0	0	0	0	0	0	0	0
AL357673.1	1.79577	0	2.28499	0.787087	0.489003	0.555285	2.33326	1.41081	4.14237	0
CDCP2	0	0	0.448654	0.329523	1.06378	0.667597	0	0	0.714605	0.941474
AL357673.2	0.897886	0	1.83634	1.05259	3.06267	2.33345	2.33326	3.28597	3.78506	1.38594
CYB5RL	591.707	482.889	283.814	349.619	260.756	396.07	197.344	251.535	276.958	265.204
MRPL37	1772.43	1812.51	1090.04	956.17	929.904	879.469	1048.79	914.991	678.677	952.21
SSBP3	2272.55	2246.78	3254.82	2348.66	3693.29	2741.74	2199.26	1746.78	783.369	1438.67
SSBP3.AS1	28.7323	43.5942	75.8247	77.2212	109.699	72.3558	77.0587	55.4859	94.8416	60.9177
AL161644.1	1.79577	0	1.93807	0.787087	2.53079	1.89048	2.3536	3.28597	1.42921	0.457599
AL035415.1	0	0	0	0	0	0	0	0	0	0
AC099796.1	0	0	0	0	0.489003	0	0	0	0.357303	0
AC099796.2	0	0	0	0	0	0	0.593484	0	0	0.457599
HNRNPA1P63	0	1.6767	0.34692	0.988568	0	0.555285	1.73978	0	0.499638	0
ACOT11	112.236	80.4816	84.5709	89.0746	108.789	82.4883	128.065	33.538	2172.17	168.434
FAM151A	4.48943	10.0602	5.95766	3.88083	5.50769	3.22567	26.6698	0.785755	81.3455	9.30964
AL590093.1	0	0	1.59115	0.723066	0.489003	0	2.33326	0.625053	33.4962	2.31427
MROH7	0	0	6.60978	12.8231	12.122	4.11162	15.597	0	397.58	17.6647
MROH7.TTC4	0	0.838349	0	0	0	0.667597	0	0	45.2755	0.470737
TTC4	25.1408	20.1204	10.7728	19.6056	20.5036	12.4472	15.7394	17.6977	22.568	19.4951
PARS2	372.623	422.528	230.792	198.122	161.781	131.054	160.914	88.5417	221.399	169.467
TTC22	41.3027	33.534	5.18038	14.2787	1.02089	0.667597	0.593484	1.41081	1.07191	1.84354
AC096536.2	0	0	0	0.329523	0	0	0	0	0	0
LEXM	9.87674	3.3534	2.8771	2.62676	1.55278	2.44576	3.54057	6.26828	3.42776	2.77187
DHCR24	15997.6	13233.3	5954.98	7397.65	2076	5816.78	5590.92	6143.85	1819.38	5138.76
AC096536.3	1.79577	1.6767	0.448654	0.393543	0	0	1.16663	0.625053	0.714605	0.928336
AC096536.1	0	0	0.34692	0.988568	0.531889	1.66585	0.573148	1.25011	1.21424	3.24261
AL590440.2	2.69366	0	0	0	0.978006	0	0	0	0	0.915199
TMEM61	13.4683	19.282	1.48941	2.89226	0	0.555285	1.71944	0	1.35658	0
AL590440.1	0	0	0	0	0	0	0	0	0	0
BSND	33.2218	16.767	0.448654	3.88083	1.55278	2.77642	0.593484	6.42899	0	5.13869
PCSK9	8051.34	4500.26	781.791	388.379	150.963	170.86	57.6974	497.748	2.92812	537.796
USP24	3114.77	3217.59	4463.93	2403.71	3655.22	2309.15	2730.97	2600.34	3053.93	2484.28
MIR4422HG	0	0	0	0	0	0	0	0	0.499638	0
GYG1P3	0	0	0.448654	0	0	0	0	0	0	0
MIR4422	0	0	0	0	0.489003	0	0	0	0.357303	0.915199
GOT2P1	0	0	0	0	0	0	0	0	0	0
MTCO2P34	0	0	0	0	0	0	0	0	0	0
RN7SKP291	0	0	0	0	0	0	0	0	0	0
RNU6.830P	0	0	0	0	0	0	0	0	0	0
Y_RNA.22	0	0	0	0	0	0	0	0	0	0
AL603840.1	0	0	0.34692	0	0	0	0.573148	0	0.85694	1.86981
LINC01753	0	0	0	0	0	0	0.573148	0	0	0
PIGQP1	0	0.838349	0.448654	0.787087	0.489003	0	0	0	0	0
LINC01755	0	0	0	0	0	0	0	0	0	0
AL353681.1	0	0	0	0	0	0	0	0	0	0
AC119674.1	1.79577	1.6767	2.28499	2.4347	3.01979	2.55808	2.88607	3.76807	2.92812	1.3728
AC119674.2	0	0	1.14249	0	0.531889	1.22288	0.573148	0.625053	0.714605	0.941474
RPSAP20	0	0	0	0	0	0	0	0	1.21424	0
LINC01767	0	0	2.48846	1.38211	11.6759	0	8.16642	0.625053	1.57155	0
PLPP3	653.661	708.405	602.803	425.18	664.566	197.27	530.329	186.781	538.792	436.279
RPL21P23	0	0	0	0.393543	1.46701	0	2.29259	0.785755	1.21424	0.928336
RPL23AP85	0	0	0	0	0	0	0	0	0.85694	0
AC099789.1	0	0	0.34692	0	0	0	0	0	0	0
PRKAA2	632.111	696.668	512.714	767.473	1229.44	407.75	1008.11	307.753	2640.63	447.132
FYB2	0	5.86845	336.186	61.9464	440.811	13.5577	52.5188	28.5021	18.2804	26.9218
AL360295.1	0	0	0.34692	0	0	0	0	0	0	0
C8A	0	0	0.693841	0.393543	1.50989	0	2.31293	0	0.357303	0
C8B	0	0	0	0	2.04178	0	0	0	0	0
AL161740.1	0.897886	0	0	0	0.978006	0	0	0	0	0
DAB1	498.327	502.171	1086.28	905.799	1440.43	294.702	576.97	108.918	423.381	343.655
AL390243.1	4.48943	7.54515	9.75035	5.84855	6.57147	0.555285	2.88607	0.785755	5.14164	1.38594
RPS20P5	0.897886	0	0	0.329523	0	0	0	0	0.357303	0.457599
DAB1.AS1	1.79577	1.6767	0	0	0.489003	0.667597	0	2.82162	0	1.84354
HNRNPA1P6	0.897886	0.838349	1.59115	0.787087	2.53079	3.66864	0	3.44667	0	2.30113
RPS26P15	0.897886	0.838349	0	0	0	0	0	0	0.499638	0.470737
AL445193.2	0	0.838349	0	0	0	0	0	0	0	1.38594
AL445193.1	0	0	0	0	0	0	0	0	0	0
AL357373.1	0	0	0	0	0	0	0	0	0	0
OMA1	154.436	155.933	116.529	124.635	199.855	89.3701	147.67	100.935	207.621	133.615
AL035411.2	0	0	0	0	0	0	0	0	0	0
RN7SL713P	0	0	0	0	0	0	0	0	0	0
TACSTD2	17.0598	2.51505	5.38384	3.55131	48.917	3.11336	78.7578	1.41081	173.108	8.32875
AL035411.1	1.79577	0	0.34692	0.329523	0	0	1.1463	0	0	0
MYSM1	4198.51	2347.38	1517.18	966.847	1636.07	808.124	1856.01	1611.56	2392.65	2226.27
AL136985.3	0	0	0	0.329523	1.9989	0	0.593484	0	1.07191	0.915199
JUN	162.517	125.752	186.59	402.968	384.902	704.573	534.521	738.568	1262.72	782.353
LINC01135	0	1.6767	0	0	0	0	0	0	6.71319	0.457599
AL136985.2	0	0	0	0	0.489003	0	0	0.625053	0.85694	0
AL136985.1	0	0	0	0	0.531889	0	0	0	1.35658	0
AC105277.1	0.897886	2.51505	0.34692	0	3.01979	0	1.16663	1.57151	2.78579	0
LINC01358	3.59154	0	0	0	0.978006	0.555285	0	0.785755	0.85694	1.38594
PHBP3	0.897886	0.838349	0.448654	0.723066	0	0.667597	1.18697	0.785755	0	0
AL592431.2	0.897886	4.19175	0	0	0	0	0	0.625053	0	0.915199
AL592431.1	8.08097	5.86845	0.448654	0.329523	0	0	0	0.785755	0	0.928336
HSD52	0	1.6767	0	0	0	0	0	0	0.357303	0
AC093424.1	0	5.0301	0.795574	1.51015	1.55278	3.9993	1.71944	0.625053	4.78434	3.24261
FGGY	125.704	128.267	160.393	119.875	149.625	93.488	80.0871	73.362	84.6192	97.7884
MIR4711	0	0	0	0.787087	0.489003	0	0	0	0	0.457599
AL035416.1	0	0	0	0.393543	0.489003	0	1.18697	0.785755	0.357303	0.941474
HOOK1	1368.38	1543.4	322.505	553.707	708.911	370.389	696.235	397.51	1265.39	616.442
CYP2J2	9.87674	10.8985	7.32191	5.98601	6.48569	7.78026	325.019	11.6079	499.722	15.7686
RN7SL475P	0	0	0	0	0.531889	0	0.573148	0	0	0
C1orf87	6.2852	5.0301	1.34596	1.71163	2.57367	0	16.3125	0.785755	0.357303	2.79815
PGBD4P8	0	0	0	0	0	0	4.11371	0	0	1.39907
AC097066.1	0	0	0	0	0	0	0.593484	0	0	0
LINC01748	133.785	113.177	51.6757	53.1039	54.7678	37.2355	39.6045	41.36	175.124	56.0658
AC099792.1	0	0	0	0	0	0.667597	0	0	2.07118	3.67393
NFIA	33.2218	31.8573	26.9295	32.3742	29.3914	68.0196	38.4175	101.703	538.723	459.958
NFIA.AS2	0	0.838349	0	0	0.489003	1.77817	0	0	1.85622	5.08614
AC096947.1	0.897886	0.838349	0	0.393543	0	0	0	0.785755	3.64273	1.38594
NFIA.AS1	0	0	1.14249	0.659045	0	0	0	0	1.07191	0.457599
AC099791.1	0	0	0	0	0	0	0	0	0	0
TM2D1	89.7886	101.44	127.537	145.675	176.597	175.402	262.716	193.084	275.046	225.73
AC099791.2	0	0	0.448654	0	0.489003	0	1.71944	1.25011	0.85694	0
PATJ	1800.26	1685.08	1199.35	1500.84	2000.82	639.617	1830.88	625.364	1447.48	868.965
RNU6.414P	0	0	0	0	0	0.555285	0	0	1.85622	0
RNU6.1177P	0	0	0.897307	0	0.489003	0	0.593484	1.41081	1.21424	0
LAMTOR5P1	0	0.838349	0.795574	1.05259	0	0	1.18697	1.25011	1.85622	0
RN7SL180P	0	0	0.34692	0.393543	0	0	0	0	0.357303	0.470737
MIR3116.1	0	0	0	0	0	0	0	0	0.499638	0
MIR3116.2	0	0	0	0	0	0	0	0	0	0
PIGPP2	0	0	0	0	0	0	0	0	0	0
RPS15AP7	0	0	0	0	0	0	0	0	0	0
L1TD1	8062.11	7515.8	859.893	1615.46	1288.31	1280.69	530.655	3489.42	41.7083	3858.22
AL162739.1	25.1408	26.8272	5.01863	10.2604	0.978006	4.77921	0	3.75032	0	12.8916
Y_RNA.23	0	0	0	0	0	0	0	0	0	0
KANK4	22.4471	10.8985	12.9927	94.1587	110.514	12.6718	401.833	23.966	298.024	55.2294
RNU6.371P	0	0	0	0	0	0	0.573148	0	0.499638	0
USP1	1413.27	1376.57	1238.2	1109.75	1314.21	1395.86	866.437	1125.81	788.578	1002.71
DOCK7	1333.36	1230.7	1532.22	1497.15	1871.34	2310.38	2144.68	3398.66	1488.27	2276.46
AL451044.1	0	0	0.34692	0.329523	0.531889	0	0.573148	1.41081	0.714605	0
ANGPTL3	8.08097	0	2.14153	2.1692	2.4879	5.55912	8.12575	11.9115	4.35733	2.34055
AL138847.2	0.897886	0.838349	1.24423	0.393543	2.57367	4.77921	1.16663	2.98232	4.78434	1.85667
AL138847.1	0	0.838349	0.34692	0.329523	0.489003	2.00279	1.76012	1.57151	1.07191	0.470737
AC103923.1	9.87674	4.19175	9.09823	8.01775	10.655	11.6735	9.31272	6.57193	25.932	13.4937
ATG4C	281.936	277.494	234.751	179.379	264.806	212.089	207.396	232.087	201.271	241.878
AC099794.1	0	0	0	0	1.02089	0	0.573148	0.785755	0.499638	0.915199
AC099794.2	0	0	0	0	0	0	0	0	0.357303	0.457599
LINC01739	0	0	0	0	0.489003	0	0	0	0.357303	0
AL162400.1	0	0	0	0	0	0	0	0.625053	0.357303	0
AL162400.2	0	0	0	0	0	0	0	0	0	0
AC096543.1	1.79577	0	0	0.393543	0.489003	0	0	0	0	0.457599
LINC00466	0.897886	5.86845	0.34692	1.51015	3.14845	2.22114	0	0.785755	1.07191	3.68707
RNA5SP49	0	0	0	0	0	0	0	0	0.357303	0
AC096543.2	0	0	0	0	0	0	0	0	0	0
RPSAP65	0	0.838349	0	0	0	0	0	0	0	0.457599
FOXD3.AS1	483.96	451.032	29.6397	94.0193	12.2078	27.7956	1.16663	41.8244	0	97.4359
FOXD3	295.404	237.253	26.2122	146.265	12.611	26.3418	0	56.5575	0.357303	84.3867
MIR6068	0	0	0	0	0	0	0	0	0.357303	0
Y_RNA.24	0	0	0	0	0	0	0	0	0	0
AL049636.1	0	0	0.34692	0.329523	0.489003	1.66585	1.73978	0	3.14309	1.38594
ALG6	313.362	349.592	184.523	236.264	179.806	176.07	162.284	233.016	121.555	246.022
ITGB3BP	253.204	290.907	323.504	319.094	351.418	321.905	202.77	243.552	186.061	204.692
EFCAB7	33.2218	31.8573	92.5369	144.496	86.0122	77.029	97.6273	86.1667	131.135	71.6133
RN7SL488P	0	0	0	0	0	0	0	0	0	0
RNU7.123P	0	0	0.448654	1.11661	0.531889	0	1.16663	0	2.57082	0
DLEU2L	8.97886	9.22184	13.1178	35.2834	25.9255	16.0035	19.2189	12.5366	46.0657	18.0303
DLEU2_6	0	0	0	0	0	0	0	0	0	0
DLEU2_5	0	0	0	0	0	0	0	0	0	0
DLEU2_4	0	0	0	0	0	0	0	0	0	0
DLEU2_3	0	0	0	0	0	0	0	0	0	0
DLEU2_2	0	0	0	0	0	0	0	0	0	0
DLEU2_1	0	0	0	0	0	0	0	0	0	0
PGM1	2383.89	2161.26	1928.17	1776.07	1654.3	877.816	2609.32	814.538	3376.1	1213.37
RN7SL130P	2.69366	5.86845	1.93807	3.09375	0.489003	0.667597	2.31293	2.50021	13.7807	4.66796
ROR1	3495.47	3256.15	3462.06	2823.94	2990.39	2196.56	1615.81	2335.57	1521.71	4058.46
AL161742.1	0.897886	0	1.59115	2.95628	3.55168	2.00279	2.31293	1.41081	1.92885	2.77187
CFL1P3	0.897886	0	1.48941	3.34983	2.65944	1.22288	1.76012	0.625053	1.49891	1.38594
RNU6.809P	0	0	0.448654	0.723066	0	0	0	0	0	0.470737
Y_RNA.25	0	0	1.14249	0	0	0	0	0.625053	0.357303	0.457599
ROR1.AS1	4.48943	1.6767	21.5222	26.3505	27.3925	12.8901	15.841	21.3051	21.5688	27.7844
UBE2U	1.79577	0	0	2.10518	1.55278	0.555285	0	1.87516	0.357303	2.75873
RNU7.62P	0	0	0	0	0	0	0	0	0	0
CACHD1	3557.42	2747.27	5243.67	2537.24	922.131	1794.55	988.222	1429.38	3735.88	2898.3
MIR4794	0	0	0	0	0	0.667597	0	0	0	0
RAVER2	1026.28	1089.02	895.487	962.448	766.183	955.444	681.622	741.89	1665.29	784.576
JAK1	967.921	1082.31	563.336	1462.26	613.179	2047.35	1356.09	3578.46	2220.49	3092.81
AL606517.2	0	0	0	0	0	0	0	0	0	0
AL606517.1	0.897886	0	0	0.393543	0	0.555285	0	0.625053	0.499638	0
LINC01359	2.69366	8.38349	3.52922	10.5165	7.67813	4.33624	5.85349	1.41081	6.57085	7.4661
SLC2A3P2	0	0	1.93807	5.1895	1.50989	0.555285	1.1463	0	3.9274	0.941474
AL357078.3	0	0.838349	1.14249	0.329523	0.531889	1.22288	0	0	4.78434	0.470737
RNU6.1176P	0	0	0.34692	2.69078	0	0	0	0.785755	1.92885	0.457599
MIR3671	8.97886	15.0903	4.32479	12.8137	3.63745	6.782	4.07304	4.23242	7.64276	6.96909
MIR101.1	0	0	0	0.393543	0	0	0	0	0	0.457599
AL357078.1	0	0.838349	1.24423	0.723066	0	0.555285	0	0	0.357303	0
AL357078.2	0	0	0	0	0	0	0	0	1.07191	0
MRPS21P1	0	0	0	0	0	0	0	0	0.499638	0
AK4	4353.85	3651.85	1501.76	1710.57	1712.48	1919.77	2997.19	3833.33	4557.38	2419.2
RPS29P7	0	0	0.448654	0.329523	0	0.667597	1.76012	0.785755	0.499638	1.3728
DNAJC6	188.556	155.933	651.891	283.046	2720.17	484.878	3462.8	671.724	2835.46	491.088
AL139294.1	0	0	0	0	2.57367	0.667597	2.33326	1.41081	3.28543	0
COX6CP13	0	0	0.795574	0	1.06378	0	1.18697	0.625053	2.57082	0
RNU2.15P	0	0	0	0	0.489003	0	0	0	0	0
LEPROT	650.069	646.367	826.669	1042.06	1392.41	1483.69	2214.72	3837.15	2027.24	2220.53
LEPR	554.893	600.258	615.946	750.256	1370.39	877.835	807.533	1178.4	1304.17	496.515
AC119800.1	0	0	1.93807	0	0.978006	1.33519	0.593484	1.41081	1.07191	0.928336
AC097063.1	0.897886	0	0	2.56274	1.50989	1.11057	0	0	1.21424	0.470737
RN7SL854P	0	0	0	0	0.531889	0	0	0	0.357303	0
PDE4B	494.735	296.776	99.9086	438.189	92.4121	610.623	53.6447	585.897	263.673	245.081
AL590783.1	0	0	0	0.329523	0	0	0	0	0.499638	0
RNU4.88P	0	0	0	0	0	0	0	0	0	0
SGIP1	58.3626	52.816	58.9874	198.804	256.75	719.553	152.256	364.186	282.256	192.284
MIR3117	0.897886	0	0.448654	1.51015	1.55278	4.89153	1.78045	5.78618	2.57082	0.457599
AL139147.1	1.79577	2.51505	2.48846	6.89172	5.63635	26.0174	3.49989	6.73264	13.3567	10.238
TCTEX1D1	19.7535	42.7558	31.3509	518.928	12.9112	111.282	63.9817	25.5552	20.1425	4.17095
INSL5	0	0	0	0.329523	0	0	1.71944	0	0	0.470737
WDR78	12.5704	5.86845	19.811	74.5342	24.2441	24.4576	27.4057	20.0727	41.4904	25.0125
AL592161.1	0	0	0	0	0.978006	0	0	0	0	0
MIER1	765.896	699.183	746.14	669.254	957.931	808.624	781.545	1072.54	798.492	865.654
SLC35D1	226.267	232.223	263.249	264.652	430.439	270.687	551.406	361.669	675.493	575.531
C1orf141	0	0	0	2.4347	1.55278	0	0.573148	0	0	0.457599
SNORA31	0	0	0	0	0	0	0	0	0	0
AL133320.1	0	0	0	3.62475	0	0	0	0	0	0
IL23R	0	0	0.693841	0	1.55278	0	1.71944	0	0	0.928336
RNU6.586P	0	0	0	0	0.489003	0	0	0	0	0
RNU4ATAC4P	0	0	0	0	0	0	0	0	0	0
AL389925.1	0	0	0	0	0	0	0	0	0	0
IL12RB2	40.4049	34.3723	27.1513	41.1338	15.6737	7.00035	5.85349	13.9474	9.35371	36.1788
SERBP1	11030.5	12678.4	7549.72	7255.54	7653.39	7028.25	6606.85	6345.76	7744.99	7467.63
RNU6.387P	3.59154	5.0301	7.16017	7.0386	9.14514	4.22393	1.76012	4.23242	8.42707	9.78038
LINC01702	0	0	0	0.393543	0	0.667597	0	0	0	0
RNU6.1031P	0	0	0	0	0	0	0	0	0	0
AL590559.1	0	0	0	0	0	0	0	0	0	0
RN7SL392P	0	0	0	0	0	0	0	0	0	0
HNRNPCP9	0	0	0	0	0	0	0	0	0	0
GADD45A	101.461	129.106	388.281	83.2166	631.306	422.524	677.301	593.326	370.881	377.728
GNG12	1989.71	1954.19	572.685	665.533	841.601	2083.25	1967.68	3649.5	3232.49	5787.82
RNU7.80P	0	0	1.04076	0.329523	0	0	0	0.785755	0	0.928336
GNG12.AS1	2.69366	3.3534	95.1688	109.245	61.4596	296.237	60.234	153.6	98.6963	147.971
AL157407.1	0	0	0	0	0	0	0	0	0.357303	0
DIRAS3	4.48943	0	22.9099	26.808	9.63414	65.0373	34.8363	39.1635	148.056	28.7259
ARL5AP3	0	0	5.2221	4.8694	1.9989	7.89257	4.03237	5.48253	25.3568	6.99537
WLS	84.4012	26.8272	5300.74	4699.07	3313.32	14894.6	3089.61	5165.87	2066.38	6495.09
CTBP2P8	1.79577	0	39.4735	71.1241	20.7353	91.8033	23.4343	42.1458	26.9951	51.4767
MIR1262	0	0	1.34596	2.10518	0.489003	3.78096	1.16663	0.785755	0	1.39907
RPS7P4	0	0.838349	0	0.393543	0	0	0	0	0	0
COX6B1P7	0	0	0	0	0	0	0	0	0.357303	0
ELOCP18	0	0	0	0	0	0	0	0	0	0
AL139413.1	0	0	0	0	0	0.667597	0	0	0	0
RPE65	0	0	0	0	1.02089	1.33519	0.593484	1.41081	7.28546	16.7626
DEPDC1	1469.84	1316.21	619.195	436.737	1211.4	1069.97	509.615	847.504	419.236	510.193
AL138789.1	43.0985	35.2107	22.7064	14.9829	19.8859	19.4475	11.6867	6.89334	4.49967	12.0946
DEPDC1.AS1	0	0.838349	1.69288	1.38211	0	1.89048	0.573148	1.25011	0.357303	3.25575
TXNP2	0	0	0	0	0	0	0	0	0.357303	0.457599
LINC01707	0	0.838349	0.448654	0.329523	0.531889	0	0	2.82162	0.499638	0.470737
AL512271.1	0	0	0	0	0	0	0	0	0.999275	0
LINC01758	0	0	0.34692	0.393543	0	0	0	0	1.71388	0
LRRC7	18.8556	32.6956	12.9561	27.5405	42.0882	46.7939	101.025	36.824	108.776	50.0908
SGO1P1	0	0	0	0	0	0	0	0	1.42921	0
RN7SL538P	0	0	0	0	0.531889	0	0	0	0	0
PIN1P1	0	0	0	0	0	0	0	0	0	0
AL158840.1	0	0	0	0	0.531889	0.667597	3.49989	0.625053	4.00003	1.38594
LRRC40	785.65	848.41	522.381	608.818	640.468	664.392	758.473	762.91	525.421	631.858
RN7SL242P	0.897886	0	0	0	0.489003	0	0.593484	0	0	0
SRSF11	4284.71	4605.89	4822.84	5417.56	5196.8	5411.11	4781.72	6447.15	6072.16	5342.28
AL353771.1	1.79577	0	0.897307	0.393543	0.978006	3.00105	1.16663	4.39313	3.00076	1.86981
ANKRD13C	504.612	484.566	499.192	481.867	625.043	636.497	534.809	823.896	514.662	650.475
HHLA3	217.288	238.93	297.654	286.846	218.642	270.101	148.634	200.746	133.267	152.547
AL158839.1	8.08097	4.19175	10.0373	9.5279	13.8892	5.88978	4.62585	3.44667	14.2833	6.52463
CTH	980.491	786.372	312.191	288.102	273.916	228.217	189.856	201.389	104.489	301.252
Metazoa_SRP.6	0	0	0	0	0.531889	0.555285	0.593484	0	0	0
AL354872.2	6.2852	3.3534	9.99554	5.85797	7.23201	7.89257	2.29259	2.19656	2.42849	4.14467
AL354872.1	0	0	0.897307	0	0	0	0	0	0	0
CASP3P1	0.897886	0	0	0	0	0	0	0	0	0
LINC01788	0	0	0	0	0.978006	0	0	0	0.714605	0
AL513285.1	0	0	0	0	0	0	0	0	0.714605	0
PTGER3	30.5281	18.4437	5.06035	5.32696	65.2769	4.11162	2.88607	5.80393	202.694	86.6352
AL031429.1	0	0	0	0	0	0	0	0	0	0
AL031429.2	0	0	0	0	0	0	0	0	3.85477	0.470737
ZRANB2.AS1	0	1.6767	1.04076	3.22179	3.63745	2.22114	1.73978	7.51839	3.28543	4.61541
ZRANB2	1250.75	1369.02	1227.58	1505.47	1402.95	1581.76	1520.66	1838.2	1946.46	1833.24
MIR186	0.897886	6.7068	4.22306	4.6039	10.1231	10.4506	7.02013	6.12534	12.2121	16.305
ZRANB2.AS2	6.2852	6.7068	9.38514	7.69764	6.57147	6.11441	12.3005	10.5185	11.4975	9.66214
AL358453.1	0	0	0	0.393543	0.531889	0	0.593484	0	0	0
NEGR1	37.7112	42.7558	8.44612	39.8157	13.2287	23.5654	7.53226	118.455	57.6388	487.217
AL354949.1	0	0	0	0.393543	0	0	0	0.625053	0.357303	0.457599
AL359821.1	0	0	0.34692	0	0	0	0	0	0	0
NEGR1.IT1	0	0	0	0	0	0	0	0	0.357303	0
GDI2P2	6.2852	7.54515	4.0796	2.95628	2.44501	0.667597	1.1463	4.85748	2.35585	2.31427
RPL31P12	1.79577	3.3534	0	1.05259	1.02089	3.00105	1.18697	1.25011	4.07266	3.26888
RNU6.1246P	3.59154	5.86845	1.24423	6.7731	1.02089	2.67039	2.94708	3.60737	6.14092	3.25575
AL583808.1	45.7922	34.3723	12.3223	22.4791	12.2936	8.1172	17.4995	15.3582	12.857	13.5069
AL583808.2	1.79577	3.3534	2.08152	5.12548	3.55168	3.89327	5.81282	8.14344	4.642	0.941474
AL732618.1	2.69366	0.838349	0	0	0	0	0	1.25011	0.499638	10.2248
KRT8P21	0.897886	0.838349	0.448654	0.393543	0	0	0.573148	0	0.357303	2.30113
RN7SKP19	0	0	0	0	0	0	0	0	0	0.470737
LINC01360	0	0	0	0	0	0	0	0.625053	0	1.38594
LINC02238	0	0	0	0	0.531889	0	0	0	0.714605	0
RNA5SP50	0	0	0	0	0	0	0	0	0	0
RNU4ATAC8P	0	0	0	0	0	0	0	0	0	0
LRRIQ3	3.59154	10.8985	9.93553	12.3656	12.0792	5.3345	8.65822	3.44667	13.9986	7.96312
FPGT	96.0738	78.8049	146.761	156.981	293.845	112.736	266.362	212.783	147.269	179.429
FPGT.TNNI3K	7.18308	10.8985	24.1124	37.1871	51.748	22.0119	43.2874	9.0899	299.697	98.4431
TNNI3K	0	1.6767	2.83538	4.40242	13.1	1.22288	15.1662	0	202.845	45.4491
AC093158.1	0	0	0.693841	1.44613	0.531889	0.555285	1.73978	1.87516	25.0692	6.49836
AC105271.1	0	0	1.69288	0.393543	4.21222	0	2.33326	0	29.2145	5.55688
LRRC53	0	0	0	0	8.61325	0	3.49989	0.625053	35.7795	17.1545
ERICH3	4.48943	0	0.34692	0.988568	4.04068	0.667597	2.90641	0	5.85625	1.86981
ERICH3.AS1	0	0	0	0	0	0	0	0	0.357303	0
AC135803.1	0.897886	0	0.34692	0	0.978006	0.667597	1.1463	0.625053	8.71174	0.470737
CRYZ	288.221	279.17	257.721	259.95	430.164	244.451	1057.28	350.703	500.378	325.583
TYW3	652.763	603.612	340.706	361.119	473.6	319.359	426.251	286.252	536.933	342.164
AC133865.1	0	0	0	0	0.531889	0	0.573148	0	0	0
AC099786.3	0.897886	0	0	3.47787	0	3.33171	0	5.64323	1.07191	0.941474
AC099786.1	0	0	0.34692	5.31754	0	3.89327	0	0.625053	0.357303	1.39907
LHX8	8.08097	6.7068	11.018	111.41	27.6927	132.72	34.3851	48.8962	14.0713	28.4128
AC099786.2	0	0	0.693841	12.9963	1.50989	11.8982	0	5.17888	0.499638	3.25575
RNU6.622P	0	0	0	0	0	0	0	0	0	0
SLC44A5	347.482	404.084	423.269	655.774	765.608	559.237	586.076	834.771	864.668	1004.78
AC093156.1	0	0	0	0	0.531889	0.555285	0	0	0	0
RNU6.503P	0	0	0	0	0.531889	0	0	0.785755	0	0
AL096829.1	0	0	0	0	0	0	0	0	0.357303	0.941474
AL096829.2	0	4.19175	1.04076	2.29724	0.489003	0.555285	1.78045	4.39313	0.85694	1.38594
AL357314.1	0	0	0	0	0.531889	0	0	0	0	0
ACADM	471.39	457.739	655.654	660.44	727.081	713.988	1251.84	647.865	1405.85	591.677
DLSTP1	7.18308	17.6053	25.6201	32.4834	17.3123	21.781	33.3202	24.3051	47.7796	27.9026
RABGGTB	1257.04	1074.76	920.036	1074.08	1151.25	1297.79	1283.69	1821.21	1591.73	1429.05
SNORD45C	0	0	0	0	0	0	0	0	0	0
SNORD45A	0	0	0	0	0	0	0	0	0	0
SNORD45B	0	0	0	0	0	0	0	0	0	0
MSH4	2.69366	5.0301	9.24169	18.0315	11.2298	2.44576	8.12575	4.53607	17.7808	17.6647
ASB17	0	0	0	0	0	0	0	0	0	0
AC092813.1	0	0	0	0	0	0	0	0	0	0.470737
AC092813.2	0	0	0	0	0	0	0.593484	0	0.357303	0.457599
ST6GALNAC3	418.415	457.739	744.213	581.707	355.322	654.747	441.97	643.543	335.265	516.586
AC103592.1	0	0	1.14249	0	0	0.555285	0.573148	1.25011	0	0
AC104458.1	0	2.51505	3.42748	3.94485	1.02089	2.55808	0.573148	4.07172	0.499638	0.928336
TPI1P1	10.7746	16.767	5.56902	3.42327	3.06267	1.66585	14.6337	3.44667	8.57233	5.11242
RNU6.161P	0	0	0	0	0	0	0	0	0	0
LINC02567	0	0	0	0	0	0	0	0	0	0
ST6GALNAC5	78.116	108.985	43.3862	136.102	36.7521	106.135	18.6254	9.55425	107.702	284.934
MIR7156	0	0	0	0	0	0	0	0	0.499638	0.457599
AL035409.1	1.79577	2.51505	0	5.32696	0.489003	1.66585	1.16663	0.785755	2.57082	3.71335
PIGK	561.179	561.694	377.133	345.812	591.534	630.189	625.05	859.362	568.164	724.402
AC113935.1	19.7535	20.9587	13.9734	22.0855	13.1429	8.55389	9.92654	11.6079	12.9994	9.27023
AC093433.1	0.897886	1.6767	0.693841	1.18063	1.06378	0.555285	0.573148	2.03586	0.357303	0.470737
AK5	116.725	153.418	18.7703	16.0543	28.6707	59.9086	11.707	81.1663	28.2152	62.1329
AC095030.1	0	0	0	0	0	0.555285	0	0	0	0.915199
[truncated: 56,304 more rows]

## Sheet: GATA6_R456GMiss
Supplemental Table 2: Mean Differential Gene Expression in GATA6 Missense Lines
Gene	GATA6 WT D0	GATA6 R456G/R456G D0	GATA6 WT D4	GATA6 R456G/R456G D4	GATA6 WT D8	GATA6 R456G/R456G D8	GATA6 WT D12	GATA6 R456G/R456G D12	GATA6 WT D30	GATA6 R456G/R456G D30
DDX11L1	0	0	0	0.492416	1.02089	0.451957	0.573148	1.42739	0	0
WASH7P	28.7323	35.3916	33.581	55.3833	36.5806	57.8205	19.6904	48.826	45.1332	32.8491
MIR6859.1	5.38731	2.79407	8.95478	7.8812	3.01979	10.524	2.92675	10.573	7.35516	7.59526
MIR1302.2HG	0	0	0	0	0	0	0	1.42739	0	0
MIR1302.2	0	0	0	0	0	0	0	0	0	0
FAM138A	0	0	0	0	0	0	0	0	0.499638	0
OR4G4P	0	0	0	0	0	0	0	0	0	0
OR4G11P	0	0	0	0	0	0	0	0.533923	0.357303	0
OR4F5	0	0	0	0	0	0	0	0	0	0
AL627309.1	0	0	0	0	0	0.918241	0.593484	1.48551	0.714605	1.37061
AL627309.3	0	0	0	0	0	0	0	0	0	0
CICP27	1.79577	6.5195	0.897307	2.07966	1.59567	7.38891	1.73978	3.98075	1.85622	6.20189
AL627309.7	14.3662	24.2153	32.0864	17.7321	17.9728	20.5959	20.9384	29.2129	19.2129	13.0549
AL627309.8	44.8943	42.8424	57.0779	25.6133	27.4182	39.4414	25.6456	43.2435	29.4962	34.9391
AL627309.2	10.7746	4.65678	1.7346	2.02466	2.04178	2.75472	1.18697	1.00972	2.42849	2.02176
AL627309.5	10.7746	27.9407	16.1984	16.0898	10.6979	16.4997	7.02013	17.5248	13.284	13.7516
RNU6.1100P	0	0	0.34692	0	0	0.903913	0	0	0	0
AL627309.4	0	0	0	0	0	0.451957	0	0	0	0
FO538757.2	0	1.86271	0	0.492416	2.08467	0	0	0.475795	0	0
FO538757.1	82.6055	92.2043	79.946	100.698	73.3928	98.8184	69.5671	114.12	71.9162	65.2291
MIR6859.2	0	0	0	0	0	0	0	0	0	0
AP006222.1	8.08097	8.38221	10.4025	4.15931	9.18802	6.93695	12.6906	12.291	25.1389	10.2226
RPL23AP24	0	0	0	0	0	0	0	0	0	0
AL732372.1	0	0	0	0	0	0	0	1.60177	0	0
AL732372.2	38.6091	65.195	54.7512	42.083	34.2213	59.2767	40.1166	59.6208	49.0635	35.6131
WBP1LP7	0	0	0	0	0	0	0	0	0	0
OR4F29	0	0	0	0	0	0	0	0	0	0
CICP7	0	0	0	0	0	0	0	0	0	0
AL732372.3	4.48943	4.65678	1.79461	4.21431	2.53079	4.61986	1.18697	3.86449	1.71388	0.696688
U6	0	1.86271	0	0	0	0	0	0	0	0
AL669831.3	8.97886	7.45085	7.89573	6.29396	1.55278	5.48079	6.97945	8.91308	6.28325	3.46067
AC114498.1	0	0	0	0	0	0	0	0	0	0
MTND1P23	16.1619	31.6661	10.5876	23.2586	16.8233	18.8884	32.1129	14.3686	19.7852	10.2226
MTND2P28	2167.5	3233.67	2117.19	2122.58	2420.89	2008.2	3749.46	1563.35	3452.87	3525.06
MTCO1P12	394.172	2354.47	354.208	603.552	509.846	376.342	640.521	396.001	1803.14	423.504
MIR6723	0	0	0	0	0	0	0	0	0	0
MTCO2P12	24.2429	39.117	10.3842	21.454	15.4849	12.4751	18.5644	16.2136	23.9973	30.8273
MTATP8P1	1.79577	1.86271	0.34692	3.17448	3.06267	1.3702	1.18697	1.42739	1.21424	0.673921
MTATP6P1	14037.5	22456.9	11031.4	12604.7	11558.7	9808.54	15118.5	9100.44	16995.4	16238.8
MTCO3P12	103.257	110.831	15.4628	45.26	25.9255	36.5577	36.1452	29.7576	63.6983	19.8397
WBP1LP6	0	0	0	0	0	0	0	0	0	0
OR4F16	0	0	0	0	0	0	0	0	0	0
CICP3	1.79577	0.931357	0.897307	1.09482	1.59567	4.11059	0.573148	1.00972	0.357303	8.15535
AL669831.1	68.2393	81.028	86.1906	129.046	90.2589	128.339	71.6767	84.8164	66.272	87.6051
RNU6.1199P	0	0	0	0	0	0	0	0.475795	0.357303	0
AL669831.2	1.79577	0	0.897307	0	0	0.466284	0	0.475795	0.357303	0
AL669831.5	43.9964	81.028	40.2925	78.3145	51.6622	55.984	40.4013	56.6605	101.842	54.2187
AL669831.4	0.897886	0	3.87614	2.62707	5.50769	6.485	1.78045	7.71821	4.85697	6.22466
FAM87B	6.2852	1.86271	3.1823	13.4078	3.10556	11.9228	6.36563	11.699	14.353	8.89757
LINC01128	253.204	213.281	250.212	210.098	534.664	639.648	936.371	616.927	1328.17	1436.03
LINC00115	4.48943	2.79407	11.5867	13.8452	4.04068	15.1295	5.83316	14.3104	17.4961	6.15635
FAM41C	0.897886	0	0.448654	0.492416	0	0.466284	1.16663	0	0	1.37061
TUBB8P11	3.59154	0.931357	1.24423	0.984833	0.531889	0	1.18697	0	0	0
AL669831.6	0	0	0	0	0	0	0	0	0	1.37061
AL645608.7	2.69366	0.931357	19.1355	26.2707	21.9277	40.7973	10.52	36.7094	9.49605	7.5725
AL645608.3	8.97886	24.2153	239.914	268.873	265.26	464.429	93.924	354.444	104.558	107.559
AL645608.5	0	0	0	1.09482	0.489003	3.67296	0	1.90318	0	0
AL645608.1	23.345	25.1466	1063.78	578.249	985.572	695.661	467.945	918.782	416.348	1197.5
SAMD11	23.345	12.1076	1500.92	428.629	1246.81	350.911	384.131	533.037	155.972	506.806
NOC2L	2876.83	3356.61	1832.72	2426.7	1489.22	1703.57	1578.79	1458.48	1113.38	1320.78
KLHL17	542.323	612.833	690.942	830.1	446.567	565.069	371.643	614.507	183.249	160.27
PLEKHN1	68.2393	58.6755	58.789	78.3721	64.8481	46.7013	53.8481	510.597	30.8499	3.41514
PERM1	10.7746	5.58814	4.9169	12.4229	5.67923	7.72625	8.20709	56.301	11.0705	2.71845
AL645608.8	0.897886	0.931357	22.156	36.7214	18.5649	22.4754	19.3206	29.6414	3.9274	17.144
HES4	6.2852	8.38221	158.048	121.602	251.971	97.5341	282.861	204.228	93.9091	187.978
ISG15	135.581	78.234	137.741	75.5775	144.855	80.7192	244.297	148.868	75.1987	89.809
AL645608.4	0	0	0.34692	0.492416	0.489003	1.83648	0.573148	1.06785	0.999275	2.04453
AL645608.2	0.897886	0	1.7346	6.84137	7.7639	10.524	6.44698	9.9228	26.998	6.80751
AGRN	10501.7	11072	13823.1	15980.5	18672.4	14683.2	13732.7	35151	5812.43	12280.1
AL645608.6	0	0	0	0	0	0	0	0	0	0
AL390719.1	36.8133	21.4212	28.7841	32.2347	31.8364	46.8876	31.0479	90.2245	10.1409	12.2672
AL645608.9	1.79577	0.931357	0	5.25414	0.489003	2.78338	3.49989	7.96149	0	0
RNF223	0.897886	1.86271	1.38768	3.72189	4.65834	11.0189	8.20709	56.1373	4.642	2.76398
C1orf159	206.514	255.192	282.984	419.096	316.339	444.306	314.441	568.278	143.69	193.301
LINC01342	2.69366	0.931357	0	1.64223	0	0	0	0	0	0
MIR200B	0	0	2.24327	0	0.531889	0	0	0.533923	0	0
MIR200A	0.897886	0	1.79461	0.547412	0	0	0	1.00972	0	0
MIR429	0.897886	0	6.7298	0.492416	0	0	0	1.00972	0	0
AL390719.2	20.6514	18.6271	28.8573	4.21431	3.01979	1.38453	4.03237	5.58252	0	0
TTLL10.AS1	3.59154	1.86271	4.42652	3.00949	1.46701	0	0	0.951591	0	0
TTLL10	5.38731	0.931357	4.87518	2.51708	1.46701	4.11059	0	4.93234	0	0
TNFRSF18	2.69366	0.931357	23.1734	2.68206	2.12755	1.38453	1.71944	3.56308	0.357303	0
TNFRSF4	4.48943	0	0.34692	2.18965	0.531889	2.75472	0.573148	4.99047	0.714605	0
SDF4	885.315	900.622	1415.99	946.883	905.754	937.825	1425.44	1379.27	1133.01	1832.53
B3GALT6	91.5843	249.604	452.055	510.928	375.877	582.459	463.197	624.114	372.374	775.719
C1QTNF12	12.5704	27.9407	86.1672	54.0161	41.9596	25.2301	15.7597	35.747	22.9951	10.9649
AL162741.1	0.897886	2.79407	5.26382	4.2693	5.10446	4.15358	4.64619	6.00018	0.714605	4.11183
UBE2J2	576.443	755.33	682.216	617.708	608.049	624.598	638.989	623.457	425.06	525.207
LINC01786	3.59154	0	4.67171	11.0007	3.46591	15.1868	5.81282	10.9325	6.64056	8.20088
SCNN1D	32.3239	94.067	109.609	242.385	109.407	262.194	140.772	208.002	173.32	115.268
ACAP3	582.728	969.542	690.143	1300.16	881.45	1497.92	1398.18	1801.5	752.923	1560.62
MIR6726	0	0	0	0	0	0	0	0	0	0
PUSL1	333.116	332.494	265.223	272.43	215.76	226.605	233.818	305.93	149.389	188.069
INTS11	1862.21	1940.95	1684.78	1811.48	1329.26	1382.42	1168.15	1610.97	1036.66	970.746
MIR6727	0	0	0	0	0	0	0	0	0	0
AL139287.1	17.0598	18.6271	19.5241	39.5135	20.0575	28.9891	19.8327	32.1947	25.9987	16.4473
CPTP	270.264	283.132	296.598	272.922	256.132	324.777	498.03	532.604	312.725	438.048
TAS1R3	10.7746	7.45085	17.3592	21.069	12.7826	27.5759	7.59327	32.0204	15.0735	34.9619
DVL1	1018.2	903.416	1423.64	1315.1	959.973	832.414	810.728	956.311	626.247	456.108
MIR6808	0	0	0	0	0	0	0	0	0	0
MXRA8	221.778	162.987	2061.64	2217.05	1467.46	3681.81	1171.67	4512.11	499.98	736.34
AURKAIP1	520.774	591.411	553.824	315.338	399.203	346.615	675.093	340.318	320.441	377.705
NDUFB4P8	0	0.931357	0	0.492416	0	0	0	0	0	0
CCNL2	2182.76	1706.25	2977.59	3495.54	2699.72	4195.19	2838.72	4957.22	2395.26	2533.61
AL391244.1	281.936	244.015	262.91	269.973	180.261	264.13	190.202	285.979	164.323	222.621
MRPL20	148.151	142.498	229.016	141.632	200.309	150.312	284.516	154.683	180.117	176.808
RN7SL657P	0	0	0	0	0	0	0	0	0	0
AL391244.3	87.0949	61.4695	94.4698	120.722	37.9016	84.0549	16.9263	84.5946	77.6331	52.5977
ANKRD65	28.7323	17.6958	45.9581	47.7771	22.1594	59.1477	13.4061	181.375	6.28325	0.673921
AL391244.2	2.69366	1.86271	3.87614	9.96086	1.9989	5.05749	0.593484	3.50495	1.35658	0
TMEM88B	1.79577	2.79407	7.54881	2.02466	3.14845	2.27411	0	3.56308	0.499638	0.673921
LINC01770	3.59154	10.2449	16.1149	22.8762	11.1869	9.70601	13.4264	16.2825	39.2072	3.41514
VWA1	486.654	447.051	817.229	794.578	480.257	725.819	634.407	2349.74	288.806	180.429
ATAD3C	8.97886	13.9704	8.26094	18.5519	22.3738	21.0909	17.4791	84.1081	17.6414	3.4379
ATAD3B	624.031	895.034	490.217	612.559	395.746	625.329	390.74	700.265	287.659	336.851
AL645728.2	0	0.931357	0.795574	0.984833	0.531889	1.3702	4.07304	4.097	5.56865	4.80851
ATAD3A	797.322	944.396	518.67	551.549	457.548	495.771	630.819	554.516	349.777	424.993
TMEM240	39.507	25.1466	68.748	61.5098	57.9591	53.7816	51.8236	55.175	67.6315	52.1287
SSU72	1178.92	1352.33	1272.99	1015.84	1053.67	1067.84	1210.72	1007.2	960.933	1164.45
AL645728.1	7.18308	7.45085	9.09823	8.59106	5.14734	16.9516	8.16642	11.699	11.5702	13.0777
AL691432.3	0	0	0	0	0	0	0	0	0.357303	0
FNDC10	275.651	723.664	226.204	723.003	185.416	369.27	252.545	379.153	468.746	472.464
AL691432.2	78.116	63.3323	81.8841	111.809	48.814	145.419	74.5017	119.099	194.328	210.4
MIB2	1000.24	862.436	1809.06	1555.95	1341.99	1236.86	1217.17	1506.03	1856.92	1822.22
MMP23B	5.38731	10.2449	41.7168	22.1638	34.8819	19.2687	10.459	10.4567	10.5709	26.8293
CDK11B	674.312	720.87	559.189	541.903	528.513	471.926	536.549	438.969	378.855	390.578
FO704657.1	0	0	0	0	0	0.932569	0	0.951591	0	0
SLC35E2B	1647.62	2076.93	1587.16	2289.01	1609.11	2381.54	1273.39	2201	1185.66	1642.79
AL691432.1	18.8556	49.3619	34.4366	86.1957	44.8335	94.2272	36.6981	92.498	46.4142	49.9248
MMP23A	1.79577	0	4.18134	2.57207	1.02089	3.22101	1.18697	5.04859	0.357303	0.673921
CDK11A	35.9154	56.8128	31.9247	55.6583	40.8785	46.7587	42.5109	50.9617	36.7817	36.9837
AL031282.2	17.9577	44.7051	48.1648	71.908	38.751	82.2614	25.7066	67.4768	42.9894	45.9495
AL031282.1	79.0139	111.763	141.748	211.3	119.565	206.899	90.2207	189.373	149.18	194.672
SLC35E2	74.5245	118.282	121.099	147.161	80.1185	196.052	72.9043	160.033	124.84	155.416
NADK	1301.04	1301.11	1092.62	1082.78	947.156	918.334	920.761	1028.56	550.769	690.582
GNB1	8060.32	7936.09	5896.64	6904.11	6647.77	6420.08	7508.94	7158.5	3603.27	5696.99
AL109917.1	0.897886	0.931357	2.63191	0.492416	1.02089	5.04316	5.28035	4.15513	4.42704	9.50319
CALML6	0.897886	13.9704	6.50805	4.59673	0.489003	11.9371	3.49989	8.91308	3.21279	6.85304
TMEM52	192.148	293.377	133.578	164.24	62.5061	52.763	27.4057	36.4661	35.9974	9.57149
CFAP74	3.59154	3.72543	6.91498	9.46844	2.53079	11.4852	1.78045	5.52439	41.9901	0
AL391845.2	6.2852	9.31357	0.693841	1.03983	0	0	0	0	0	0
GABRD	30.5281	44.7051	1.38768	5.69156	2.12755	0.466284	0	0	0.999275	0
AL391845.1	0	3.72543	0.34692	1.58724	0.489003	2.30277	1.16663	0.951591	0.499638	0
PRKCZ	736.266	660.332	455.102	511.383	316.468	461.804	390.004	547.754	502.269	414.62
AL590822.2	2.69366	7.45085	5.91594	4.59673	5.19023	8.73045	2.86574	8.90231	6.35589	6.15635
PRKCZ.AS1	36.8133	74.5085	62.0965	88.0554	78.4371	117.112	50.6773	131.681	81.052	66.3948
FAAP20	597.094	730.184	914.38	827.028	680.051	624.584	625.851	680.847	450.583	663.593
AL590822.1	0	0	1.04076	0.547412	0.978006	0.466284	2.37394	0	0	0.696688
SKI	2386.58	2945.88	2219.67	2553.02	2339.39	1922.2	1452.73	2465.43	1108.75	1788.75
MORN1	140.07	156.468	268.502	276.379	205.242	306.269	176.531	228.832	199.958	183.525
AL589739.1	0	0.931357	7.44707	4.10432	3.01979	11.4995	4.05271	7.90337	2.28615	1.37061
AL513477.1	35.0175	52.156	83.1466	77.5471	50.6241	98.3234	60.6242	52.8757	32.067	47.3884
AL513477.2	0	0	4.97691	3.22947	3.10556	5.04316	6.38597	4.097	14.9253	4.74021
RER1	822.463	872.681	899.126	769.19	788.823	820.693	1076.64	1187.91	792.159	1055.36
PEX10	547.71	594.206	472.305	726.122	392.289	543.62	374.041	573.062	279.807	454.473
PLCH2	0	3.72543	1.38768	5.19914	0.978006	12.7981	0.593484	17.2233	2.71316	8.89757
AL139246.1	0	0	0	0	0	0	0	0	0	0
AL139246.4	0	0	0	0	0	1.35587	0.593484	0.951591	0	0.696688
PANK4	223.574	311.073	297.889	341.006	270.854	239.998	350.054	306.304	531.208	492.577
HES5	0.897886	0	1.04076	2.68206	0	0	0.573148	0.951591	0	0
AL139246.5	0	0	0	0	0	0	0	0.475795	0	0
TNFRSF14.AS1	0	0	0	0	0	0	0	0	0	0
TNFRSF14	0	4.65678	7.40535	3.17448	1.50989	0.918241	1.16663	0.533923	2.35585	0.696688
AL139246.2	0	0	0	0	0	0	0	0	0	0
AL139246.3	0	0	0	0	0	0	0	0	0	0
FAM213B	353.767	281.27	166.137	203.421	87.3678	127.055	90.9159	154.704	103.481	104.166
MMEL1	6.2852	0	2.53018	0	0.489003	0	0	0	1.49891	0
AL831784.1	0.897886	0	0	0	0	0	0	0	0	0
TTC34	4.48943	0	0.448654	0	0	0	1.18697	0	1.49891	0
AC242022.1	0	0	0	0	0.489003	0	0	0	0	0
AL592464.2	0	0	0	0	0	0	0	0	0	0
AL592464.1	0	0	0	0	0	0	0	0	0	0
AL589702.1	0	0	0	0	0	0	0	0	0	0
ACTRT2	0	0	2.14153	0	3.63745	0.451957	0.593484	0	1.71388	0
LINC00982	0	0	1.59115	9.35845	1.55278	8.68747	6.95912	12.6505	2217.73	332.247
PRDM16	15.2641	17.6958	31.1708	48.8694	27.8815	61.5078	96.9524	60.2236	1164.74	413.628
MIR4251	0	0	0	0	0	0	0	0	0	1.34784
AL008733.1	0	0	2.24327	0	0	0	1.16663	0.475795	3.21279	1.34784
AL512383.1	0	0	0.448654	1.58724	0.978006	0.918241	0	0	10.5709	9.52596
AL590438.1	0	0	1.04076	1.03983	0	1.38453	0.573148	0.475795	20.1425	10.8966
ARHGEF16	490.246	451.708	671.045	337.119	397.41	403.969	490.867	666.246	191.888	82.9332
AL512413.1	0.897886	3.72543	3.87614	2.07966	7.01758	11.4422	7.02013	6.23269	4.49967	4.13459
MEGF6	1007.43	1260.13	2012.34	2259.42	1871.54	4100.35	1418.24	4455.01	880.034	1826.46
MIR551A	0	0.931357	0	0.547412	0	0.466284	0	0	0	0
AL513320.1	4.48943	2.79407	4.9169	7.55377	0	4.08194	0.573148	6.65036	2.71316	6.11082
TPRG1L	276.549	337.151	449.619	353.489	402.858	365.231	585.303	468.41	478.144	624.619
WRAP73	360.052	494.55	441.762	435.19	327.337	417.104	309.385	537.482	241.03	222.417
TP73	120.317	113.626	136.872	173.426	71.3337	111.588	63.9817	278.359	45.781	22.5581
AL136528.1	0	0	0	0	0	0	0	0	0.714605	2.04453
AL136528.2	2.69366	0.931357	0	0.492416	0	0	0.573148	0	0.357303	0
TP73.AS1	928.414	1084.1	944.896	1167.83	915.02	1130.33	751.351	1137.67	888.778	923.918
TP73.AS1.1	0	0	0	0	0	0	0	0	0	0
CCDC27	18.8556	12.1076	11.9753	23.3686	6.70012	17.0233	20.3855	16.8057	68.195	38.9599
SMIM1	6.2852	4.65678	19.399	11.0557	10.655	14.1826	21.04	26.6122	41.781	24.6254
LRRC47	1901.72	1383.06	978.25	886.686	942.386	846.303	972.442	881.142	1194.98	966.52
RN7SL574P	6.2852	1.86271	3.22402	1.58724	1.02089	3.20668	0.593484	8.49542	4.2847	5.48243
AL365330.1	6.2852	8.38221	10.5042	14.5576	5.14734	19.2974	6.40631	15.4472	9.99861	19.2113
CEP104	593.502	493.619	648.911	646.325	736.809	580.185	683.378	719.544	618.348	633.608
DFFB	209.207	181.615	116.362	110.659	116.167	115.189	93.1438	126.807	119.553	102.932
C1orf174	232.552	240.29	288.545	306.414	255.06	274.769	254.265	309.413	204.26	185.601
LINC01134	4.48943	4.65678	7.05843	7.2238	2.53079	8.24984	1.73978	3.3887	7.9245	10.2909
LINC01346	0	0	0	0	0	0	0.593484	0	0.357303	0
LINC01345	0	0	0	0	0	0	0	0	0	0
AL805961.1	0	0	0	0	0	0	0	0	0	0
AL805961.2	0	0	0	0	0.489003	0	0	0	0.85694	2.04453
EEF1DP6	0	0	0.448654	0	0	0	0	0	0	0
LINC01777	0	0	0	0	0	0	0	0	1.07191	0
AL355602.1	0	0	0	0	0	0	0	0	0	0
Z98747.1	0	0	0	0	0	0	0	0	0	0
LINC01646	0	0	0	0	0.531889	0	0	0	1.42921	0
AJAP1	62.852	0	22.9048	0	8.9736	0	18.0726	0	4.3544	0
BX005132.2	0	0	0	0	0	0	0	0	0	0
BX005132.1	0	0	0	0	0	0	0	0	0	0
AL691497.1	0.897886	0	0	0	0	0	0	0	0	0
AL139823.1	0	0	0	0	0	0	0	0	0.499638	0
Z98259.3	0	0	0.34692	0	0	0	0	0	0.714605	0.673921
Z98259.2	0	0	0	0	0	0	0	0	0	0
Z98259.1	0	0	0	0	0	0	0	0	0	0
Z97988.1	0	0	0	0	0	0	0	0	0	0
AL365255.1	0	0	0.448654	0	1.06378	0	0	0	0	0
MIR4417	2.69366	0	0	0	0	0	0	0	0	0
MIR4689	0	0	0.795574	0.547412	0	0.466284	0	0	0	0
NPHP4	376.214	365.092	909.589	961.436	495.922	708.559	371.298	610.072	209.033	255.275
KCNAB2	178.679	103.381	329.37	318.507	192.691	232.609	141.695	230.829	172.184	111.133
CHD5	91.5843	129.459	31.4943	56.5331	50.7444	23.8026	21.6539	17.1071	5.71391	28.0633
RPL22	1262.43	971.405	2207.32	1281.22	1588.58	1243.42	1286.28	1089.25	1918.74	1129.95
AL031847.1	0	0.931357	0	2.18965	0.531889	2.28844	4.66653	2.49523	7.92743	15.1222
RNF207	79.9118	107.106	89.086	219.286	345.765	633.134	633.895	495.154	2798.04	5646.75
ICMT	2776.26	3362.2	1738.53	1881.36	1514.1	1546.5	1902.08	1390.28	1263.97	1789.28
LINC00337	94.278	68.9204	37.8875	36.504	27.2639	10.072	9.35339	9.44701	6.71319	4.08906
HES3	129.296	106.175	4.77344	38.3636	4.52968	0	0	0.475795	0	0
GPR153	323.239	421.905	365.288	600.345	128.735	384.829	156.268	603.241	523.992	592.057
ACOT7	2840.91	3323.08	775.622	1012.3	657.832	783.977	1117.55	770.549	145.979	631.586
AL031848.2	0	0	0	0	0	0	0	0	0	0
HES2	17.9577	24.2153	3.08056	26.5431	5.14734	61.5651	16.3328	687.963	39.274	0.673921
ESPN	201.126	134.115	52.4845	71.5857	60.5501	102.771	38.007	180.877	15.9246	3.4379
MIR4252	0	1.86271	0.34692	0	0	0	0	0	0	0
AL031848.1	1.79577	0	0	0.547412	0	0.466284	0	1.60177	0	0
TNFRSF25	197.535	195.585	271.046	243.375	245.692	187.221	223.359	362.579	167.318	139.711
PLEKHG5	1192.39	1092.48	1189.35	1106.6	1027.75	787.435	824.951	1529.1	687.586	674.011
NOL9	630.316	668.714	590.462	541.515	650.84	689.873	567.881	459.08	444.657	545.42
RNU6.731P	0.897886	0	1.69288	0	0	0.451957	0.573148	0.951591	3.21279	0
AL591866.1	3.59154	8.38221	8.11749	6.18397	3.14845	6.79368	7.51193	7.66008	5.14164	7.52696
TAS1R1	3.59154	2.79407	3.52922	3.6669	6.21112	1.85081	4.68686	2.49523	4.92667	6.17912
ZBTB48	369.031	319.455	321.756	402.188	314.066	377.217	284.825	351.905	241.527	300.837
KLHL21	900.579	1197.72	802.283	1234.36	1125.42	1072.77	1212.03	1144.63	2027.55	3093.38
PHF13	699.453	784.202	1019.75	878.207	1027.94	849.718	725.258	732.274	484.564	600.326
THAP3	102.359	76.3712	165.873	106.827	150.157	135.534	142.797	127.537	138.827	125.959
DNAJC11	1532.69	1698.79	818.163	1095.42	698.479	833.239	893.973	726.013	814.637	929.582
LINC01672	0	0	0	0	0.531889	0	0	0	0.357303	0
AL591163.1	0	0	0.34692	0	1.50989	0	0.593484	0	0	0.673921
CAMTA1.DT	5.38731	4.65678	4.22306	3.17448	2.08467	2.7404	0.573148	3.02916	2.14382	1.37061
CAMTA1	355.563	482.443	643.225	575.29	580.871	440.146	626.733	414.471	615.333	451.408
AL590128.1	0	0.931357	1.14249	1.58724	0.978006	1.3702	0	0	2.71316	3.41514
AL512330.1	0	0.931357	0	0	0	0	0.593484	0	0	1.39338
RNU1.8P	0	0	0	0.547412	0	0	0.573148	0	0.357303	0
CAMTA1.IT1	0	0	0.34692	0	0	0	0.593484	0	0.85694	2.04453
Z97987.1	0	0	0.693841	0.492416	0	0.466284	0	0	0.714605	0
AL365194.1	0	0	1.34596	0.984833	0.531889	0.903913	0.593484	0.951591	0	0
AL359881.3	0.897886	13.9704	11.078	15.5974	1.9989	10.524	7.63395	10.8163	3.28543	6.15635
AL359881.2	4.48943	1.86271	2.28499	5.25414	0.489003	4.12492	2.90641	2.55336	1.07191	1.34784
AL359881.1	0	2.79407	10.2825	17.0197	9.54837	21.9088	1.73978	13.6021	4.35733	10.3365
VAMP3	492.939	583.029	567.08	588.632	828.776	919.626	1156.46	1094.34	1416.3	1639.13
Z98884.2	5.38731	6.5195	7.60882	10.4533	6.65724	11.9515	8.71923	16.0866	20.9239	27.4349
PER3	430.087	434.944	251.464	480.998	282.118	379.327	112.407	339.244	933.162	448.817
Z98884.1	4.48943	2.79407	3.32575	3.93933	4.21222	6.92263	0	4.99047	17.3567	4.80851
UTS2	0	0	1.48941	1.47725	2.4879	0.903913	3.47956	1.06785	0	0
TNFRSF9	0	0	0	2.46208	4.12645	264.619	18.1133	38.3112	7.21283	34.1286
AL009183.1	0	0	0	0	0	0	0	0	0	0
PARK7	625.826	597	1285.83	532.659	840.7	616.792	1377.93	536.959	707.964	716.264
Y_RNA	2.69366	0	2.97883	3.06449	2.53079	1.35587	2.3536	4.15513	1.57155	2.04453
AL034417.4	2.69366	17.6958	9.64862	8.86604	12.3365	23.9459	12.1988	44.5439	5.35661	8.10982
AL034417.3	0	1.86271	0.34692	1.64223	1.46701	1.38453	1.16663	0.533923	0.85694	0.673921
ERRFI1	802.71	1014.25	1176.64	352.502	3416.09	2155.19	2643.41	2574.6	826.417	755.993
AL034417.2	2.69366	1.86271	5.2221	7.55377	7.7639	12.884	5.28035	8.25213	6.64056	3.41514
AL034417.1	0	0	0.448654	0	0	0	0	0	0.357303	0.673921
AL358876.1	0	0	0	0	0	0	0	0	0	0
LINC01714	0	0	0	0	0	0	0	0	0.499638	0.696688
RNU1.7P	0	0	0	0	0	0	0	0	0	0.696688
AL358876.2	0	0	0	0	0	0	0	0	0.999275	0
RNU6.991P	0	0	0	0	0	0	0	0	0	0
SLC45A1	59.2605	55.8814	8.20093	9.79587	20.9068	26.672	5.21934	39.4479	12.5694	27.4577
Y_RNA.1	0	0	0	0	0	0	0.593484	0	0	0
RERE	2713.41	3569.89	2427.17	3019.71	4168.22	3354.25	3449.76	3365.15	1973.03	2942.07
AL096855.1	2.69366	0.931357	3.38576	2.13465	3.55168	6.42769	5.30068	2.01944	2.71316	5.5052
SNORA77	0.897886	0.931357	0.795574	1.64223	0	0.903913	0	1.06785	0.85694	0.696688
AL096855.2	2.69366	1.86271	0	0	1.02089	0.903913	0.593484	2.01944	1.71388	0.696688
RPL7P11	0.897886	0	3.4692	1.47725	5.19023	6.92263	2.86574	3.44682	10.9979	6.78474
RPL7P7	0.897886	1.86271	4.36651	4.43175	6.65724	6.42769	8.16642	5.46626	12.4968	4.76298
Y_RNA.2	0	0	0.34692	1.58724	0.489003	5.90409	3.49989	1.00972	1.57155	3.4379
AL357552.1	1.79577	2.79407	2.48846	2.51708	2.57367	5.01451	1.76012	4.87421	4.2847	2.02176
AL357552.2	0	0.931357	3.97787	4.10432	5.59346	10.5669	5.89417	5.40813	10.4983	10.9649
RPL23AP19	0	0	0	0	0	0	0	0	0.357303	0
ENO1	28855.4	25762.3	20370.9	20048.8	17888.4	12750.5	36029.7	9315.08	31359.3	11972.5
MIR6728	0	0	0	2.46208	1.06378	0.451957	0.573148	0	1.21424	0.673921
ENO1.IT1	2.69366	10.2449	3.97787	7.16881	6.35704	3.67296	8.14608	2.07756	22.998	6.85304
ENO1.AS1	0	0	1.24423	2.13465	0.489003	2.27411	1.16663	2.55336	1.07191	3.39237
RNU6.304P	0	0	0	0	0	0.451957	0	0.475795	0	0
HMGN2P17	0	0	4.12132	3.72189	2.44501	1.85081	4.66653	1.00972	0.85694	2.0673
AL139415.1	0	0	0	0	0.531889	0	0	0	0	0
AL139415.2	0	0	0	0	0	0	0	0	0	0
CA6	0	0	0	0	0	0	0	0	0.999275	2.78675
RN7SL451P	0	0	0	0	0	0	0	0	0	0
SLC2A7	0.897886	0	0	0.984833	0.531889	0	0	0	0.714605	0
SLC2A5	0.897886	1.86271	0.34692	1.58724	0	1.35587	1.76012	0	3.9274	5.4369
SCARNA16	0	0	0	0	0	0	0	0	0	0
GPR157	42.2006	122.939	90.2519	152.582	248.463	198.684	532.171	350.797	313.942	245.853
MIR34AHG	281.936	311.073	173.584	318.402	178.416	388.811	146.727	291.333	248.891	123.309
MIR34A	0	0	0	0	0	0	0	0	0	0
LINC01759	11.6725	14.9017	12.5674	24.7934	12.9112	47.7772	16.3939	51.6227	32.2123	18.4463
Z98044.1	5.38731	8.38221	1.7346	8.86604	5.99669	18.4078	3.45922	25.6025	11.6399	8.8748
H6PD	361.848	453.571	1173.37	1971.36	1117.04	2408.35	1313.39	2786.55	1367.55	1978.75
SPSB1	84.4012	118.282	417.035	319.007	313.036	746.286	333.266	1279.92	154.621	335.403
BX323043.1	0	0	0	0	0.489003	0.451957	0.593484	1.48551	0.714605	0.696688
AL928921.2	0	0	0.693841	3.22947	1.95601	3.65864	2.3536	12.6505	6.99786	10.3365
RNA5SP40	0	0	0	0	0	0	0	0	0	0
AL928921.1	0	0	0	0	0	0	0	0	0.357303	0.696688
SLC25A33	237.94	224.457	198.719	167.41	211.531	177.386	183.816	135.836	115.135	122.658
AL954705.1	20.6514	13.039	8.15921	6.23897	7.14624	7.82654	3.47956	6.35972	7.7851	6.80751
TMEM201	777.569	1086.89	769.862	849.412	767.916	757.29	727.754	615.412	693.643	694.511
PIK3CD	689.576	841.946	382.7	549.239	377.309	424.636	276.756	711.488	211.037	169.213
PIK3CD.AS1	0	0	0	0	0.489003	0	0	0	0	0
AL691449.1	0	0	0.34692	0	0.531889	0	0	0	0	0
PIK3CD.AS2	47.5879	44.7051	55.1449	39.6759	26.3716	22.0664	29.1861	20.4377	37.8477	18.674
CLSTN1	3241.37	3554.99	3910.85	4894.48	3794.54	4076.65	3010.93	5385.89	2009.08	3467.13
MZT1P1	0	0	0	0	0.531889	0	0	0.533923	0.357303	0
AL357140.3	0	0	0.34692	0.492416	0	0.451957	0	0	0.357303	0
CTNNBIP1	988.572	917.386	1283.71	1478.29	1226.85	1431.95	1527.61	1595.19	976.07	1206.71
AL357140.1	0	0	0	0	0	0	0	0	0	0
LZIC	253.204	283.132	399.506	330.22	489.024	357.06	780.066	375.521	828.61	837.305
AL357140.2	4.48943	4.65678	5.07864	4.15931	3.06267	5.04316	7.02013	3.92262	2.28615	4.83128
NMNAT1	67.3414	38.1856	73.7118	51.059	83.859	59.5997	175.344	79.0595	185.053	238.622
RN7SKP269	0.897886	4.65678	1.48941	2.73706	2.57367	1.3702	3.47956	1.06785	5.14164	3.41514
AL357140.4	0.897886	1.86271	1.69288	0.984833	2.04178	2.28844	2.33326	2.13569	8.1424	2.71845
MIR5697	0	0	0.448654	0	0.531889	1.86514	0.573148	0.951591	1.21424	1.34784
AL603962.1	0	0	0	0	0	0	0	0	0	0
RBP7	17.9577	14.9017	17.3826	7.8812	10.8266	1.85081	23.8448	6.11644	6.42852	1.34784
UBE4B	3124.64	4298.21	2713.11	2726.01	2468.24	2091.55	2656.2	1923.92	2540.05	2454.3
AL590639.1	0	0	0.448654	0	0	0	1.76012	0.533923	0	0
PGAM1P11	0.897886	0.931357	2.59019	3.11948	1.06378	0	2.90641	0	0.357303	0.673921
RNU6.828P	0	1.86271	1.83634	1.53224	0	2.31709	1.76012	2.9129	3.14309	3.4379
KIF1B	5458.25	6069.65	4327.34	5301.51	4095.98	3840.85	5730.54	3858.87	4589.74	4989.23
MIR1273D	0	0	0	0.547412	0.978006	0	0	0	0	0
RNU6.37P	0	1.86271	1.48941	1.58724	1.50989	1.38453	4.66653	1.96131	1.21424	4.85405
RN7SL731P	0	0	0	0	0	0	0	0	0	0
AL139424.3	8.08097	30.7348	29.7231	17.6771	28.4992	25.6821	37.8443	27.1461	17.4961	15.0539
AL139424.2	3.59154	10.2449	8.60786	13.2428	11.1011	17.4323	21.5318	9.50514	7.71246	5.52797
PGD	6156.8	7203.11	4533.45	4800.29	3223.13	3867.15	3040.57	3660.97	2462.95	2647.68
AL139424.1	1.79577	0	1.59115	2.62707	0.531889	1.83648	0	0	0	0
CENPS.CORT	2.69366	7.45085	5.2221	5.52657	5.06157	3.67296	2.31293	6.95177	1.78651	3.4379
CENPS	5.38731	2.79407	14.3621	7.16881	14.3354	6.37038	15.1662	5.16485	9.42634	8.24642
CORT	7.18308	4.65678	7.60882	4.10432	9.18802	10.9616	6.99979	9.44701	14.783	13.1232
DFFA	3068.08	2853.68	2455.8	2231.56	2228.1	1541.28	1819.58	1704.27	2199.81	1570.01
AL354956.1	0	0	0	0	0	0	0	0	0	0
PEX14	271.161	334.357	341.705	337.279	323.726	277.151	352.689	308.229	224.884	340.781
RN7SL614P	2.69366	0.931357	3.52922	6.62139	0.489003	5.5381	0	3.98075	2.92812	7.54973
CASZ1	123.01	205.83	99.0501	258.532	292.232	126.889	871.213	173.381	1361.87	1998.35
AL139423.1	8.08097	24.2153	12.2205	19.4293	20.1176	6.41336	31.8688	11.6408	47.8463	69.136
HSPE1P24	0	0	0	0	0	0	0	0	0	0
C1orf127	19.7535	23.2839	4.77344	21.3414	1.02089	0.466284	0.573148	0	6.99786	26.8065
CFL1P6	0.897886	0.931357	0.795574	0.492416	1.95601	0.466284	0.593484	1.42739	1.71388	1.37061
TARDBP	1960.08	2895.59	2699.62	2453.6	2367.47	2417.19	2185	1708.83	1998.98	2004.03
AL109811.4	0	0	0	0	0.531889	0.451957	0	0	0.499638	0.696688
MASP2	42.2006	106.175	86.1255	75.7975	214.748	86.7809	141.858	76.0411	146.412	114.193
AL109811.3	12.5704	23.2839	43.3262	29.2252	62.8235	33.523	43.023	34.9225	49.2785	48.6224
SRM	3694.8	4353.16	1671.52	2375.05	1225.99	1347.22	1523.04	1474.29	691.505	1017.45
EXOSC10	1933.15	1783.55	1504.17	1723.36	1185.34	1281.12	1187.28	1098.57	750.308	772.44
AL109811.1	0	5.58814	3.63095	4.21431	3.50879	10.524	3.47956	6.05831	9.78365	5.52797
AL109811.2	0.897886	3.72543	5.12036	3.00949	1.9989	0.903913	4.68686	3.56308	0.714605	6.80751
MTOR	6601.26	7533.74	3647.43	4483.01	3491.44	3239.67	3514.56	3006.75	2559.62	3178.69
MTOR.AS1	0.897886	0	0.693841	0.984833	0.489003	1.3702	2.29259	2.07756	3.07046	2.74122
RNU6.537P	0	2.79407	0	0.492416	0	0.932569	1.16663	0	0	0
ANGPTL7	1.79577	1.86271	8.24265	22.4388	5.55057	3.20668	15.1662	11.5246	4.642	12.9639
RNU6.291P	0	0	0.693841	0	0.978006	0	0.593484	0	0.999275	0
RPL39P6	0	0	0	0	0	0	0	1.96131	0	0
UBIAD1	975.104	823.319	431.637	487.719	394.33	375.941	416.223	324.199	331.084	366.103
UBE2V2P3	0.897886	2.79407	0.795574	1.64223	2.53079	2.30277	0	0.951591	0.499638	1.37061
AL031291.1	0	0	0	0.492416	1.46701	0	0	0.475795	0	0
MTCYBP45	0	0	0	0	0.489003	0	0	0	0.499638	0.673921
DISP3	214.595	330.632	765.715	264.059	68.6743	101.035	43.4538	105.937	3.21279	9.52596
LINC01647	0	0.931357	0.34692	2.68206	0.531889	0	0.573148	0.475795	1.42921	0
AL031731.1	9.87674	12.1076	5.01863	12.4779	9.23091	4.11059	4.64619	9.56326	11.4975	2.74122
FBXO2	604.277	722.733	730.834	440.17	355.219	264.948	501.96	645.159	375.421	312.339
FBXO44	549.506	490.825	458.644	499.982	383.718	333.816	442.137	523.135	515.344	459.577
FBXO6	44.8943	48.4305	46.2867	58.2854	52.8719	50.5462	66.437	71.1669	55.1289	40.4899
MAD2L2	4890.78	3340.78	1098.42	1614.4	921.222	962.575	628.099	892.677	340.508	252.465
DRAXIN	1039.75	1329.98	800.907	2025.98	272.741	794.415	133.528	355.051	13.4961	4.08906
AGTRAP	1113.38	1051.5	956.574	857.078	576.701	517.816	624.355	596.787	295.302	286.881
C1orf167	37.7112	52.156	30.657	34.9692	19.1396	10.5813	1.1463	5.52439	0.357303	1.37061
AL953897.1	5.38731	1.86271	1.79461	0.984833	0	0.466284	0	0.475795	0	0
MTHFR	618.643	543.912	441.88	499.332	370.507	605.609	882.713	683.084	2072.91	2380.73
CLCN6	588.115	800.035	610.129	777.834	677.623	882.094	1006.16	705.89	772.859	920.571
NPPA.AS1	4.48943	6.5195	4.77344	2.07966	1.50989	9.16808	5.83316	5.10672	1.21424	10.9421
NPPA.AS1_1	0	0	0	0	0	0	0	0	0	0
NPPA.AS1_2	0	0	0	0	0	0	0	0	0	0
NPPA	0	1.86271	36.0826	5.14414	69.6952	6.44202	3172.19	3.67933	2684.61	15897.1
NPPA.AS1_3	0	0	0	0	0	0	0	0	0	0
NPPB	2.69366	0.931357	181.086	68.6836	976.839	608.148	5190.35	393.891	285.443	1512.41
AL021155.1	0	0	0	0	0	0.451957	0	0	0	0
RNU5E.1	0	0	0	0.984833	0.489003	1.39885	0.573148	0	1.07191	0
RNU5E.4P	0	0	0	0	0	0.451957	0.573148	0	0	0
KIAA2013	1652.11	1352.33	1376.15	1308.9	1171.74	990.387	1194.96	1528.78	1147.12	1080.08
PLOD1	1661.99	1523.7	2750.96	2031.87	2061.56	1534.78	2751.84	3342.82	3506.26	4372.82
MFN2	2570.65	2659.95	1782.7	2486.15	1970.22	2551.65	3741.14	2568.58	6042.34	7426.26
AL096840.1	0	0	0.448654	0	0	0	0	0	0	0
MIIP	765.896	748.811	789.59	652.127	501.258	401.02	397.513	384.587	158.97	225.9
Y_RNA.3	0	11.1763	5.46729	6.29396	3.46591	5.52377	5.26001	7.71821	4.21207	6.78474
MIR6729	0	0	0	0	0	0	0	0	0	0
RN7SL649P	0	0	0	0	0.531889	0	0.593484	0	0	0.673921
TNFRSF8	590.809	779.546	96.1862	63.9769	9.05937	10.5669	4.05271	4.51467	1.35658	1.39338
RNU6.777P	0	0	0	0	0	0	0	0	0	0
RPL23AP89	0	0	0	0	0	0	0	0	0	0.673921
MIR7846	0	0	0	0	0	0	0	0	0	0
TNFRSF1B	31.426	72.6458	90.2856	168.392	43.8298	16.0477	26.8529	35.8159	24.8513	4.08906
MIR4632	0	0	0	0	0	0	0	0	0	0
RPL10P17	0	0	0	0	0	0	0	0	0	0
SNORA70	0	0	0	0	0	0	0	0	0	0
VPS13D	2047.18	2333.05	1499	1540.73	1715.56	1420.07	2199.49	1764.69	4222.62	2129.68
SNORA59A	5.38731	5.58814	2.48846	7.99119	4.04068	4.59121	4.07304	9.20372	37.0693	15.7278
AC243836.1	0	0	0	0	0.489003	0.466284	0	0	0	0
DHRS3	459.717	368.817	209.471	371.538	426.39	1109.77	692.898	898.355	887.489	434.779
RNU6ATAC18P	0	0	0.448654	0	0	4.1679	6.40631	0.475795	2.64345	2.02176
MIR6730	1.79577	0	0	1.03983	0	0.903913	0	1.48551	2.07118	0
AC254633.1	7.18308	10.2449	1.48941	9.85087	3.55168	24.3406	10.337	6.95177	24.279	15.0539
AADACL4	0	1.86271	0	0	0	0.466284	0	0	0.357303	2.02176
AC244670.1	0	0	0	0	0	0	0	0	0	0
AADACL3	74.5245	159.262	0.795574	14.1202	24.9475	2.30277	36.7997	10.2823	0	0.696688
C1orf158	0	0	0.34692	0	1.02089	0.466284	0.593484	0	0.357303	0.673921
PRAMEF12	8.08097	1.86271	0	0	0	0.451957	0	0	0	0
PRAMEF1	0	0	0	0	0	0	0	0	0	0
LINC01784	0	0	0	0	0	0	0	0	0	0
PRAMEF11	0	0	0	0	0	0	0	0.533923	0	0
PRAMEF30P	0	0	0	0	0	0	0	0	0.499638	0
HNRNPCL1	0	0	0.34692	0	0	0.451957	0	0	0	0
PRAMEF2	0	0	0	0	0	0	0	0	0	0
PRAMEF4	0	0	0	0	0	0	0	0	0	0
PRAMEF10	0	0	0	0	0.489003	0	0	0	0	0
PRAMEF7	0	0	0	0	0	0	0	0	0	0
RNU6.1072P	0	0	0	0	0	0	0	0	0	0
PRAMEF29P	0	0	0	0	0	0	0	0	0	0
PRAMEF6	0	0	0	0	0	0	0	0	0	0
PRAMEF28P	0	0	0	0	0	0	0	0	0	0
PRAMEF27	0	0	0	0	0	0	0	0	0	0
HNRNPCL3	0	0	0	0	0	0	0	0	0	0.673921
PRAMEF25	0	0	0	0	0	0	0	0	0	0
PRAMEF34P	0.897886	0	0	0	0	0	0	0	0	0
PRAMEF35P	0	0	0.693841	0	0	0	0	0	0	0
HNRNPCL2	0	0	0	0	0	0	0	0	0	0
PRAMEF36P	0	0	0	0	0	0	0	0	0	0
AC245056.1	0	0	0	0	0	0	0	0	0	0
PRAMEF26	0	0	0	0	0	0	0	0	0	0
HNRNPCL4	0	0	0	0	0	0	0	0	0	0
PRAMEF9	0	0	0	0	0	0	0	0	0	0
PRAMEF13	0	0	0	0	0	0	0	0	0	0
PRAMEF18	0	0	0	0	0	0	0	0	0	0
PRAMEF31P	0	0	0	0	0	0	0	0	0	0
PRAMEF5	0	0	0	0	0	0	0	0	0	0
PRAMEF32P	0	0	0	0	0	0	0	0	0	0
RNU6.771P	0	0	0	0	0	0	0	0	0	0
PRAMEF8	0	0	0	0	0	0	0	0	0	0
PRAMEF33	0	0	0	0	0	0	0	0	0	0
PRAMEF15	0.897886	0	0	0	0	0	0	0	0	0.696688
AC243961.1	0	0	0	0	0	0	0	0	0	0
PRAMEF14	0	0.931357	0	0	0	0	0	0	0.357303	0
PRAMEF19	0	0	0	0	0	0	0	0	0	0
PRAMEF17	0	0	0	0	0	0	0	0	0.714605	0
PRAMEF20	0.897886	0	0	0	0	0	0	0	0.357303	0
LRRC38	0.897886	3.72543	3.73268	0	0.531889	1.38453	0	1.48551	0	1.37061
AL354712.1	0	0	0	0	0	0	0	0	0	0
BRWD1P1	0	0	0	0	0	0	0	0	0	0
PDPN	1294.75	1637.33	302.762	318.405	273.77	274.891	182.958	418.865	300.464	650.615
RNA5SP41	0	5.58814	0.448654	0	0.489003	0	0	0.951591	0.357303	0
AL359771.1	0	0	0.448654	0	0	0	0	0.475795	1.07191	0.696688
SCARNA11	0	0	0	0	0.489003	0	0	0	0	0
PRDM2	648.273	691.998	871.158	878.857	987.657	1081.01	1003.43	1227.78	919.928	1130.57
KAZN	273.855	276.613	971.741	609.174	744.728	456.818	337.791	623.722	334.5	380.424
RNU6.1265P	0	0	0	0	0	0	0	0	0	0
AL357873.1	0	0	0	0	0	0	0	0.475795	0	0
KAZN.AS1	0	0	0	0	0	0	1.76012	0.951591	0	0
TBCAP2	0	1.86271	2.63191	1.47725	3.63745	4.60553	0.573148	2.07756	0.714605	4.76298
TMEM51.AS1	5.38731	4.65678	13.5248	8.20863	15.9739	7.91251	56.3681	95.5164	219.743	119.311
TMEM51	70.0351	53.0873	90.2468	97.7464	77.9052	34.4555	192.043	179.392	233.756	176.453
C1orf195	0	1.86271	1.93807	0.492416	0.489003	0	1.73978	2.07756	6.28618	2.74122
AL035405.1	1.79577	0.931357	0.34692	2.07966	0.531889	0.466284	1.1463	4.097	4.642	2.0673
AL391094.1	0	2.79407	0	0	1.06378	1.39885	0	1.54364	0.357303	1.39338
FHAD1	18.8556	20.4898	67.0968	93.3121	15.1847	19.6634	15.6783	24.4184	30.7104	20.5364
AL031283.2	0	0	0	0	0	0.466284	0	0	0	2.69568
AL031283.3	0	2.79407	0.897307	1.96967	0	0.451957	0	0	3.07046	0
AL031283.1	0	2.79407	1.79461	3.6669	0.978006	0	0.593484	1.00972	2.35585	0.673921
EFHD2	290.915	343.671	498.744	358.898	246.241	239.18	216.583	535.401	317.437	175.151
CTRC	0	0	0	0	1.50989	0.451957	0.573148	1.54364	1.92885	1.37061
CELA2A	0	0	0	1.09482	1.02089	1.38453	0.573148	2.55336	9.06904	2.74122
CELA2B	6.2852	0.931357	5.12036	3.17448	4.61545	8.26417	3.47956	4.097	8.857	1.37061
CASP9	271.161	137.841	229.926	169.819	189.611	235.851	299.129	215.117	638.752	507.549
DNAJC16	734.47	631.46	712.635	666.135	702.065	601.276	764.7	526.978	855.599	795.763
SCARNA21B	0	0.931357	0	0	0.531889	0.451957	0.593484	0	2.92812	0
AL121992.3	0	0	0.34692	1.09482	0	0.903913	0	0.475795	0.499638	0
AGMAT	64.6478	66.1263	22.2161	19.7017	15.7166	4.57688	9.33305	6.53411	2.92812	0.673921
AL121992.1	6.2852	1.86271	4.46824	4.2693	1.50989	3.68729	0.573148	0	0.714605	1.37061
CHCHD2P6	1.79577	0.931357	1.83634	1.09482	1.95601	0	1.73978	0.951591	3.42776	2.04453
RNU7.179P	0	0	0	0	0	0	0	0	0.499638	0
CD24P1	0	0.931357	0	0	0.489003	0	0	0	0	0
DDI2	1887.36	1939.08	1434.75	1791.82	1511.35	1415.45	1459.16	1749.03	1565.47	891.547
RSC1A1	0	0	0	0	0	0	0	0	0	0
AL121992.2	0	0	0.693841	0	1.50989	0	0	0.475795	0	0.696688
PLEKHM2	2066.93	1935.36	2078.51	1971.83	2172.51	1566.88	1839.67	1851.55	1837.96	2556.84
AL450998.2	10.7746	33.5288	24.5011	26.7606	22.2452	26.1627	23.292	34.5156	34.4258	54.2415
SLC25A34	1.79577	15.8331	12.5674	18.3345	33.964	55.9697	50.1448	68.9149	25.0662	66.3493
SLC25A34.AS1	0	0.931357	0	0	0	1.3702	0	0.475795	0	0
TMEM82	4.48943	4.65678	8.89477	8.70105	7.10335	2.78338	3.49989	0.951591	0	0.696688
FBLIM1	2077.71	2794.07	1256.56	1518.68	1039.4	1840.67	1781.98	3477.77	1932	3112.9
RPL12P14	0	0	1.24423	0	2.08467	1.85081	0	1.42739	0.357303	2.76398
UQCRHL	8.08097	9.31357	13.1178	15.05	22.9486	31.6292	17.5401	22.3408	28.3546	20.4908
AL450998.1	1.79577	8.38221	16.6053	5.19914	13.2287	9.66302	10.4793	10.9325	6.71319	6.13359
FLJ37453	44.8943	32.5975	67.1151	74.7026	48.1534	66.0131	47.2587	52.4946	97.485	100.614
SPEN	2862.46	3042.74	3675.73	4812.21	4207.15	3897.61	2160.65	3974.74	1340.4	2048.85
AL034555.1	0	0.931357	0	0	0.531889	0	0	0	0	0
ZBTB17	416.619	355.778	389.828	381.949	307.151	460.656	345.591	507.878	251.028	437.283
AL355994.4	0	0	0.795574	0	2.57367	0.903913	3.43889	2.07756	0	2.71845
AL355994.1	0	0	0	0	0	0	0	0	0	0
AL355994.5	0	0	0	0	0	0	0	0	0	0
TBC1D3P6	0	0	0	0	0	0	0	0.533923	0	0.673921
SRARP	0.897886	0.931357	1.79461	0.492416	5.55057	0.451957	4.05271	0	0	0.696688
AL355994.3	0	0	0	0	0	0	0	0	0	0
HSPB7	8.08097	5.58814	5.2221	8.31862	562.383	62.598	7234.42	22.1557	29050.1	27358
CLCNKA	27.8345	22.3526	21.337	22.6588	147.129	25.7681	90.6312	17.5248	84.3433	42.5799
AL355994.2	0	0	3.42748	6.23897	5.10446	0.466284	3.47956	1.96131	5.49894	3.3696
CLCNKB	49.3837	41.9111	43.6131	57.683	191.096	74.5065	80.6399	50.3697	197.465	87.514
FAM131C	7.18308	9.31357	18.2982	21.344	21.5245	11.0189	16.906	29.3981	53.4238	19.2113
EPHA2	1658.39	1666.2	3111.72	2950.84	1896.95	2381.88	2145.63	3258.41	873.4	2245.96
AL451042.2	0	0.931357	4.52826	1.96967	3.06267	3.19235	7.51193	18.5926	11.6428	7.54973
AL451042.1	1.79577	4.65678	1.59115	1.58724	1.9989	6.83666	8.24777	19.3698	8.99934	6.13359
ARHGEF19.AS1	0	0	0	0	0	0	0	0	0	0
ARHGEF19	1163.66	1617.77	548.456	587.663	445.194	718.122	286.971	1338.53	119.545	46.6918
ANO7L1	2.69366	4.65678	5.12036	3.06449	8.16713	7.81221	2.90641	2.01944	27.1374	2.09006
RSG1	48.4858	25.1466	67.7307	65.5642	80.7963	87.2759	126.2	94.7973	122.548	136.296
MT1XP1	3.59154	2.79407	0	1.09482	1.46701	4.57688	3.54057	1.42739	0.357303	0
FBXO42	924.822	776.751	676.699	835.996	792.307	883.757	866.584	849.804	930.586	917.051
SZRD1	1151.09	1536.74	1237.22	1227.32	1034.93	1386.75	1352.63	1286.65	1133.25	1691.55
AL358794.1	0	1.86271	1.59115	1.09482	0.978006	1.3702	1.16663	0.533923	0.357303	0.673921
SPATA21	1.79577	1.86271	1.48941	1.64223	2.57367	3.23534	1.16663	1.54364	4.85697	2.04453
NECAP2	289.119	321.318	616.04	535.779	576.16	688.932	559.983	879.635	295.305	392.531
LINC01772	27.8345	40.0483	49.8211	61.4023	47.0039	60.5609	29.6169	64.8653	66.1326	62.9569
CROCCP3	98.7674	204.898	325.942	455.55	235.715	355.977	219.55	315.995	281.893	395.719
RNU1.1	0	0	0.448654	0	0	0	0	0	1.35658	0
AL137802.2	2.69366	2.79407	2.59019	0.984833	0.489003	1.35587	2.37394	0.951591	0.85694	0.696688
AL137802.1	0	0	0	0	1.59567	0.451957	0	0	0	0
LINC01783	12.5704	1.86271	3.97787	5.47158	20.5465	9.22539	16.3939	3.98075	5.57158	1.34784
RNU1.6P	0	0	0	0	0	0	0	0	0	0
FAM231B	0	0	0	0	0	0.932569	0	0	1.21424	0
AL355149.1	0	0	0	0	0	0	0	0	0.357303	0
NBPF1	580.932	290.583	408.061	436.513	394.159	567.33	341.925	518.853	579.498	709.898
AL137798.1	1.79577	0	3.32575	1.03983	2.04178	1.38453	0.593484	0.533923	0.714605	0
CROCCP2	345.686	477.786	563.089	631.278	518.021	557.45	326.396	466.649	277.739	320.713
AL137798.3	0	0	0	0	0	0	0	0	0	0
MST1P2	11.6725	20.4898	93.8726	67.5888	53.4467	24.2976	23.8651	21.146	17.5658	16.3335
AL137798.2	0	0	0.795574	0.492416	0	0.932569	0	0	0	0
RNU1.3	0	0	0	0	0	0	0	0	0	0
FAM231A	0	0	0	0	0	0	0	0	0	0
AL021920.2	20.6514	3.72543	2.28499	9.24846	8.52748	3.67296	1.16663	5.46626	1.92885	0
EIF1AXP1	3.59154	4.65678	2.28499	5.85654	3.01979	4.59121	2.33326	3.56308	1.07191	0.673921
ESPNP	27.8345	20.4898	19.279	20.3041	28.6278	14.6632	12.2191	20.9608	12.2818	0.673921
AL021920.1	0	0.931357	0.34692	0.492416	1.06378	0	0	0	0.357303	0
FAM231C	0	0	0.34692	0	0	0	0	0	0	0
AL021920.3	0	0.931357	0.448654	0	0	0	0	0.533923	0	0
CROCC	1795.77	3062.3	1554.77	2062.11	1156.41	968.371	410.983	837.84	214.677	279.604
CROCCP4	0	0	0.693841	0.547412	1.55278	0	0	0	1.42921	0.696688
RNU1.4	0	0	0.448654	0.547412	0	0.451957	0	0	0	0
MST1L	40.4049	43.7738	131.672	70.7058	73.9074	18.3362	24.4789	14.1361	17.6414	8.96587
BX284668.1	0	0	0	0	0	0	0	0	0	0
BX284668.3	0	0	0	0	0	0.451957	0	0	0	0
MIR3675	0	0	0	0	0	0	0	0	0	0
BX284668.2	30.5281	28.8721	9.89381	26.3781	63.4067	40.9549	48.9375	19.8456	39.1375	14.4255
RNU1.5P	0	0	0	0	0	0	0	0	0	0
BX284668.5	6.2852	15.8331	19.7276	11.3281	5.99669	9.66302	12.1581	3.02916	16.0001	7.5042
BX284668.4	6.2852	1.86271	5.81421	7.71622	2.4879	5.08614	2.33326	1.90318	2.07118	2.0673
RNU1.2	0	0	1.14249	1.58724	0.489003	0	0	0	0	0
BX284668.6	0	0.931357	3.42748	0.984833	3.01979	2.78338	1.73978	1.00972	3.07046	2.04453
MFAP2	1446.49	1713.7	2134.75	1983.43	1220.75	1811.59	699.983	2021.14	733.849	1325.53
AL049569.1	4.48943	0.931357	3.12228	4.54174	2.57367	2.7404	1.78045	3.08728	2.21352	2.0673
ATP13A2	4097.95	3626.7	1903.15	2386.91	1648.47	1962.91	2075.36	2364.07	1063.32	1909.1
SDHB	583.626	739.497	613.721	432.126	651.449	424.457	1596.06	456.589	1619.31	1130.28
PADI2	199.331	208.624	26.9661	115.311	96.0067	60.0803	50.2668	82.7388	81.8481	132.161
AL590644.1	0	0.931357	0	1.09482	0	0	0	0	0.357303	0.696688
AL590644.3	0	0	0	0	0	0	0	0	0	0
PADI1	3.59154	1.86271	4.9169	7.11381	15.3991	30.3449	5.87383	12.8249	27.7126	13.7289
PADI3	123.01	33.5288	16.6053	51.4964	33.2004	37.0813	1.16663	11.9422	0.999275	1.39338
MIR3972	0	0	0	0	0	0.451957	0	0	0	0
PADI4	1.79577	5.58814	0	1.03983	0	0.451957	0.593484	0	0.714605	0
PADI6	0	0	0	0	0.531889	0	0.593484	1.00972	0.499638	0
AC004824.1	0	0	0	0	0	0	0	0	0	0
RCC2	7765.81	8963.38	4254.82	4116.28	3113.81	3728.21	1651.93	2939.29	907.64	996.869
ARHGEF10L	1859.52	1448.26	1310.3	1205.43	712.291	942.179	880.278	1326.99	1011.3	1400.53
AL136529.1	0	0	0	0	0	0	0	0	0	0
ACTL8	0	11.1763	0	0.547412	0	0.932569	0	1.06785	0	0
AL357509.1	0	0	0	0	0	0	0	0	0	0
LINC01654	0	0	0	0	0	0.451957	0	0	0	0
IGSF21	385.193	428.424	26.8461	48.4895	202.686	20.1726	33.3608	10.1553	0	1.37061
AL365209.1	12.5704	16.7644	0.693841	0.492416	3.14845	0.466284	4.07304	0	0	0.696688
AL359738.1	0	1.86271	0	0	0	0	0	0	0	0
AL591896.1	0.897886	2.79407	0	1.53224	1.06378	1.82215	0	0.533923	5.21427	1.37061
KLHDC7A	518.978	849.397	88.3167	105.785	38.0904	26.177	37.946	10.1553	35.2769	26.0871
DYNLL1P3	0	0	0	0	0	0	0	0	0	0
AL031737.1	0	0	0	1.03983	0.489003	0.918241	0	0	0.499638	0.673921
PAX7	2.69366	0	52.1661	162.758	3.10556	11.4995	0	14.9714	0	0
TAS1R2	0	0	0	0	0.489003	0	0	0.475795	0	0
AL080251.1	2.69366	0	0	0.492416	0.531889	0	0.593484	0	0.999275	2.04453
ALDH4A1	655.457	676.165	441.601	497.908	650.437	485.807	814.109	340.445	630.831	965.951
MIR4695	0	0	0	0	0	0	0	0	0	0
MIR1290	0	0.931357	0	0	0	0.466284	0	0.533923	0	0
IFFO2	287.323	312.004	310.655	504.526	280.831	574.654	318.572	749.086	134.769	259.514
AL137127.1	7.18308	33.5288	13.9734	17.6221	12.6968	21.0336	8.14608	25.0686	17.2144	21.9525
UBR4	20376.6	19588.3	9044.17	15078.6	10521.3	9587.96	9370.51	11001.4	14739.7	13106.6
AL035413.1	3.59154	1.86271	1.48941	4.2693	5.55057	3.23534	2.92675	5.58252	7.42779	5.45967
EMC1	2531.14	2543.54	2672.51	2822.25	2600.74	2347.63	2633.35	2557.96	1370.65	2470.87
MRTO4	483.96	486.168	424.346	420.07	285.704	380.849	345.408	266.297	161.822	189.659
AKR7L	3.59154	9.31357	17.1974	18.3895	25.2906	27.9419	12.7719	26.3108	7.28546	3.41514
AKR7A3	16.1619	13.9704	29.3762	32.3971	23.5407	36.5864	20.4466	42.6515	12.0669	6.83027
AL035413.2	32.3239	34.4602	79.2156	63.2095	66.0405	68.8394	52.9495	84.8379	76.5612	45.904
AKR7A2	492.041	583.029	810.786	794.808	704.664	837.872	694.329	913.569	544.834	576.981
RNU6.1099P	3.59154	1.86271	5.77248	11.3831	3.06267	9.59138	6.36563	9.38888	2.42849	2.69568
PQLC2	407.64	355.778	340.002	435.9	302.519	461.81	388.817	588.339	225.895	421.109
CAPZB	3895.03	4298.21	2685.8	2666.07	2849.96	2295.28	3233.19	2685.41	1748.65	3072.8
RN7SL277P	0.897886	0	0.34692	1.03983	0	0	0.593484	0.475795	0	3.41514
RNU4.28P	0	0	0	0	0	0	0	0	0	0
AL031727.2	0	0	0	0	0	0	0	0.533923	0.357303	0
MINOS1	43.0985	76.3712	77.6896	72.6255	65.6801	76.1424	186.519	89.9446	142.488	102.144
MINOS1.NBL1	0	0	0	0.984833	0	0	0	0	0	0
AL031727.1	12.5704	11.1763	13.9734	4.10432	6.61435	7.30295	4.62585	4.99047	12.8541	6.11082
NBL1	26.0387	40.0483	49.349	35.1367	23.3518	25.6964	26.2797	76.6331	6.71612	19.2341
HTR6	15.2641	28.8721	2.97883	13.2428	2.9769	6.87964	0	10.2716	0.357303	0
TMCO4	241.531	110.831	79.3722	55.1633	36.9838	28.0422	44.2507	176.188	39.8521	31.6834
RNF186	3.59154	0	0	0	0	0	0	0	0.499638	0
AL391883.1	0	0	0	0	0	0	0	0	0	0
OTUD3	509.999	603.519	880.447	1070.09	866.72	632.848	551.366	599.446	515.852	703.682
PLA2G2E	0	0	0	0	0	0.451957	0	0	0	0
RN7SL304P	0	0	0	0	0	0	0	0	1.21424	0.673921
PLA2G2A	15.2641	4.65678	0	3.50191	0.489003	0.903913	7.0608	4.93234	0.85694	0
PLA2G5	0.897886	1.86271	0	1.47725	0	0.466284	0	0.951591	1.71388	1.34784
PLA2G2D	0	0	0	0.547412	0	0	0	0	0	0
PLA2G2F	0	0	0.795574	0	0	16.0191	0	179.904	1.85622	2.0673
Z98257.1	0	0	0.34692	0	0	0.466284	0	0.475795	0	0
PLA2G2C	0	0	0	0.984833	0	0.466284	0	0	0.499638	0
UBXN10.AS1	0	0	0.795574	0.492416	1.06378	1.38453	0.593484	0	0.499638	1.34784
UBXN10	21.5493	13.039	42.1237	31.3598	14.8244	28.9318	14.5727	27.5746	4.2847	13.0777
LINC01757	0	0	0	0	0	0	0	0	0	0
Z98257.2	0	0	0	0	0	0	0	0	0.357303	0
VWA5B1	29.6302	22.3526	39.3352	35.6816	2.04178	3.67296	0	2.97103	1.07191	0.696688
AL020998.1	0	0	0	0	0	0	0	0.533923	0	0
LINC01141	0	0	0.448654	0	0.531889	0	0	0.533923	1.07191	0
AL139254.1	0	0	0	0	0	0	0	0	0	0
AL139254.2	0	0	0	0	0	0	0.573148	0	0	0.673921
AL139254.3	0	0	0	0	0	0	0	0	0	0
CAMK2N1	22.4471	23.2839	154.816	55.6033	192.966	96.8959	249.005	361.639	82.92	8.17812
MUL1	713.819	724.595	487.77	545.03	542.128	611.183	795.643	756.587	802.803	1126.55
RPS4XP4	0	0	0	0	0	0	0	0	0.85694	0
FAM43B	12.5704	22.3526	14.0986	30.1	3.95491	8.23551	1.1463	10.6892	10.4256	6.11082
CDA	202.922	52.156	112.99	83.2412	10.6979	13.8023	3.54057	5.88393	0	6.80751
PINK1	538.731	386.513	242.037	249.386	238.709	299.59	495.981	532.292	550.609	1125.78
MIR6084	0	0	0	0	0	0	0	0	0	0
PINK1.AS	47.5879	66.1263	67.6055	77.8221	60.1641	109.07	116.521	117.973	57.6329	134.948
DDOST	3852.83	3612.73	4857.3	3324.78	3720.75	3342.97	4767.19	4398.4	2612.9	3860.15
KIF17	636.601	687.341	419.387	801.975	238.031	139.407	64.1241	75.3112	160.048	21.233
AL663074.2	4.48943	0.931357	0.795574	0.547412	0.489003	0	0	1.06785	0.85694	0
SH2D5	225.369	390.238	148.297	293.616	53.4467	90.1452	44.8848	68.6501	29.8535	15.0767
AL663074.1	0	0	0	0	0.489003	0.466284	0	0	0.499638	0
HP1BP3	1836.18	2900.24	2827.82	3430.25	3764.73	4230.35	2453.02	3806.68	2187.64	2881.17
EIF4G3	2535.63	3294.21	2448.33	2657.43	2758.73	2128.6	2556.04	2218.7	1761.12	3212.55
RNU7.200P	0	0	0	0.547412	0	0.451957	0	0	0.499638	0
MIR1256	2.69366	1.86271	0	0	0	0.932569	0.593484	0.533923	0.714605	0.696688
RPS15AP6	0	0.931357	1.04076	2.62707	2.04178	0.451957	1.73978	1.42739	2.35585	0.673921
AL627311.1	0	0	0	0	2.12755	1.35587	1.16663	0.951591	0.999275	0.696688
HSPE1P27	0	3.72543	1.93807	3.55691	1.46701	2.30277	1.16663	5.10672	4.00003	2.04453
ECE1	1638.64	1494.83	4124.26	4140.1	3193.87	2286.25	3390.69	3578.62	1844.52	2941.47
AL031005.1	0.897886	0.931357	4.42652	4.2693	2.57367	2.31709	2.92675	1.54364	5.64128	3.41514
AL031728.1	0	2.79407	6.60978	16.4173	8.2529	10.5669	8.20709	16.2136	14.141	3.41514
PPP1R11P1	0	0	0	0	0	0	0	0	0	0
AL592309.1	0	0	0	0	0	0	0	0	0	0
AL592309.2	0	0	0	0	0	0	0	0	0	0
NBPF2P	14.3662	10.2449	17.6044	7.05881	6.16823	11.5138	6.38597	10.1553	10.8556	9.59426
HS6ST1P1	5.38731	5.58814	3.42748	3.6669	2.04178	4.12492	1.18697	10.3986	0.499638	0.696688
CROCCP5	0	0.931357	1.38768	2.02466	0.489003	0	0	0	0	0
NBPF3	501.02	420.042	533.185	389.16	386.652	449.214	259.728	438.653	324.522	318.701
PFN1P10	0	1.86271	1.7346	0.492416	0	1.86514	0	0.533923	0.357303	0
ALPL	5895.52	6393.76	3691.86	4272.67	1635.32	354.118	263.415	282.605	13.3537	18.5146
AL359815.1	0	0.931357	0.34692	0.492416	0.531889	0	0	0	0	0
RAP1GAP	243.327	308.279	231.893	290.482	319.685	130.914	155.04	137.249	220.455	203.478
USP48	2283.32	2089.96	1153.57	1316.14	1253.43	1096.7	1321.29	1280.86	1463.98	1564.67
AL590103.1	0	0	0	0	0	0	0	0	0	0
LDLRAD2	12.5704	14.9017	9.19997	11.4381	11.633	13.8309	13.9182	27.5638	18.4983	20.4225
HSPG2	8748.1	10668.7	16666.1	16144.3	18879.4	19320.8	26214.1	47641.2	24028.3	41405.6
AL590556.1	0	1.86271	0.34692	0	0	0.451957	0.573148	1.06785	4.215	0.673921
AL590556.2	0	0	0	0	0	0.466284	0.573148	0	0	0
CELA3B	0	0	0	0	0.531889	0.918241	0	0	0	0
RN7SL386P	0	0	0	0	0	0	0.593484	0	0	0.673921
RNU6.1022P	0	0	0	0	0	0	0	0	0	0
CELA3A	0	0	0.34692	0	0	0	1.1463	0	0	0
RN7SL186P	0	0	0	0	0	0	0	0	0	0.696688
RNU6.776P	0	0	0	0	0	0	0	0	0	0
LINC01635	0	2.79407	0.693841	0.984833	0.489003	0.932569	0	0.533923	0	0
LINC00339	174.19	191.859	128.625	155.427	122.481	116.882	119.529	110.673	141.843	98.3286
CDC42	2575.14	2510.01	2194.93	2274.95	3024.9	2743.29	4281.02	2781.1	2550.33	2902.25
CDC42.IT1	0	0.931357	0	2.02466	7.67813	7.8552	2.94708	7.71821	12.1424	3.39237
AL031281.1	0	0.931357	2.83538	1.53224	1.55278	1.3702	5.85349	6.17457	9.49898	1.39338
AL031281.2	0	1.86271	3.97787	5.25414	6.16823	3.65864	7.04046	7.4857	7.28546	2.0673
WNT4	20.6514	18.6271	65.7794	174.141	29.6059	131.803	68.994	484.211	26.2805	17.8634
MIR4418	0	0	0	0	0	0	0	0	0	0
PPIAP34	0	0	0	0.547412	0	0	0	0	0	0.673921
AL591122.1	0	0	0	0	0	0	0	0	0	0.696688
ZBTB40	931.107	1196.79	1142.76	1090.39	872.7	1753.88	1019.88	1458.66	863.294	1136.07
ZBTB40.IT1	2.69366	8.38221	7.20189	9.30346	8.74191	5.56676	5.85349	12.5924	4.99931	4.83128
EPHA8	111.338	152.742	29.478	57.3005	27.0494	46.3067	6.36563	41.4566	4.5723	8.22365
MIR6127	0	0	0	0	0	0	0	0	0	0
C1QA	1.79577	1.86271	0	0	0	0	0	0	0.357303	0
C1QC	0	0	0	1.09482	0	0	0	0	0	0
C1QB	0	0	0	0	0	0	0	0	0.357303	0
EPHB2	474.981	662.195	2967.75	1537.02	5496.11	1806.98	1383.27	3157.37	361.937	1602.44
MIR4684	0	0	0	0	0.489003	0	0	0.533923	0	0.696688
AL512444.1	0	0	1.59115	0	4.04068	0.451957	0.573148	2.01944	0.85694	2.0673
MIR4253	0	0	0	0	0.531889	0.903913	0	0	0	0
LACTBL1	0	0	0	0.984833	0	0.466284	1.18697	0	0	0
TEX46	0.897886	0	0.34692	1.09482	0.489003	0.466284	0.573148	1.60177	0.999275	0
KDM1A	4095.26	6164.65	5249.37	5793.25	4986.96	5640.85	3261.18	4365.98	2417.68	1901.18
AL031428.1	0.897886	0	0.448654	0.492416	1.55278	0.932569	0	0.475795	0.85694	2.04453
MIR3115	0	0	0.448654	1.03983	0	0.466284	0	0.475795	0.357303	0
MIR4419A	0	0	0	1.58724	1.59567	1.39885	0	0.951591	0	2.74122
LUZP1	2813.97	3559.65	2320.83	3079.54	2820.95	3302.1	2846.87	3270.81	1724.93	2939.9
AL161672.1	0	2.79407	4.56998	10.3433	8.12425	6.95128	5.75181	15.5053	17.1388	22.0208
RNU6.514P	0	1.86271	0.693841	0.492416	2.53079	1.83648	5.23967	1.00972	2.42849	3.4379
RNU6.135P	0	0.931357	1.48941	2.18965	2.04178	2.76905	5.26001	1.54364	5.28398	6.13359
HTR1D	234.348	247.741	82.818	111.099	15.7166	15.6674	5.26001	116.43	15.9972	0
AL109936.1	0	0	0.34692	0	0	0.451957	0	0	0.357303	0
LINC01355	62.852	102.449	190.875	293.226	124.978	258.535	127.594	202.049	434.806	258.439
AL109936.8	8.08097	17.6958	28.5624	31.9072	14.7815	31.6148	11.707	17.1071	50.3533	20.6047
HNRNPR	3230.59	4231.15	4212.25	4030.47	4234.81	4440.47	3163	3271.04	2344.38	2422.72
ZNF436	62.852	80.0967	270.529	187.386	228.002	267.394	574.291	365.217	3129.92	2510.26
ZNF436.AS1	3.59154	6.5195	130.586	86.1407	78.7975	124.695	86.0867	102.886	308.168	182.109
Y_RNA.4	0	0	0	0	0	0	0	0	0	0
AL109936.2	0	0	0.34692	0.984833	0.531889	1.80783	4.09338	0.533923	21.7808	16.379
TCEA3	0	2.79407	37.632	9.35845	40.3038	15.6101	141.122	14.7281	1269.6	421.965
AL357134.1	0	0	1.04076	0	0	0	0.573148	0	16.7118	6.15635
ASAP3	2012.16	2990.59	1801.9	1393.09	1482.86	1531.06	1282.27	1402.35	1680.09	1498.03
E2F2	137.376	233.771	137.968	228.432	128.718	279.726	71.1645	170.236	32.4911	111.179
AL021154.1	3.59154	9.31357	6.71151	3.6119	7.72101	8.75911	4.05271	9.56326	7.42779	3.41514
ID3	367.235	722.733	2146.21	1028.7	1684.2	474.602	1425.26	1002.5	143.405	374.677
MDS2	0	0	1.48941	3.83188	0.489003	0	0.573148	0.475795	0.85694	1.37061
AL451000.1	0	0	0	0	0	0	0	0	0.499638	0
RPL11	5653.99	4762.03	9370.19	5688.14	5865.8	4598	5832.07	4448.05	4345	2788.91
ELOA	1113.38	1348.6	818.45	1112.44	893.624	972.726	1042.16	928.086	989.215	1059.18
ELOA.AS1	27.8345	29.8034	17.1374	28.2403	16.3772	26.1341	12.8329	17.1071	34.5711	31.4785
PITHD1	723.696	637.979	723.883	496.038	769.461	521.36	614.798	463.304	559.356	420.526
LYPLA2	2262.67	2899.31	1641.66	1722.43	1474.69	2149.04	1868.46	2477.51	790.337	1032.7
GALE	415.721	379.062	513.064	448.431	392.657	509.215	731.946	808.548	411.149	490.905
HMGCL	329.524	185.34	427.586	370.561	390.084	311.542	435.995	410.025	433.156	376.394
FUCA1	216.39	159.262	186.618	148.313	159.13	214.825	285.333	254.481	248.69	411.743
CNR2	0	0	0	0	1.50989	0	0	0	0.999275	1.37061
BTBD6P1	0	0	0	0	0	0	1.1463	0.475795	0	0
AL590609.3	0	0	0	0	0	0	0	0	0	0
MIR378F	0	0	0	0	0	0	0	0	0	0.673921
AL590609.2	0	0	0	0	0	1.39885	0	0.951591	0	0
PNRC2	1330.67	1740.71	1367.26	1270.81	1510.46	1851.12	1292.72	1140.06	1023.68	924.851
SRSF10	3340.13	3577.34	2816.37	2351.18	4183.63	2785.17	3453.51	1882.82	2855.76	2979.73
AL590609.1	0	0	0	0	0	0	0	0.533923	0	0
AL591178.1	0	0	0	0	0	0	0	0	0.357303	0
MYOM3	2.69366	4.65678	4.46824	11.7105	2.04178	11.4565	0.593484	11.6408	22.783	32.8263
AL591178.2	0	0	0	0	0	0	0	0	0	0
IL22RA1	8.97886	5.58814	1.59115	5.69156	0	4.59121	0.573148	3.56308	0.357303	0
IFNLR1	251.408	355.778	199.18	182.24	178.87	246.132	163.267	288.383	216.533	442.433
AL590683.1	0	0.931357	0	0	0	0	0	0	1.42921	0
AL138902.1	0.897886	0	1.24423	5.30913	0.531889	0	0	4.75795	0	0
GRHL3	68.2393	171.37	77.549	847.227	234.273	189.696	87.8061	965.377	53.4238	2.71845
STPG1	243.327	163.919	174.338	166.04	130.734	105.497	105.875	106.391	142.691	71.9456
NIPAL3	476.777	366.955	232.68	268.936	489.668	274.002	629.961	636.409	1268.15	1208.23
RCAN3	457.024	476.855	502.062	323.706	373.835	156.768	403.549	442.057	249.248	216.738
AL445686.2	0	0	0	0	0.489003	0	0	0	0	0
NCMAP	15.2641	10.2449	1.14249	0	7.67813	0.903913	2.92675	5.52439	11.3552	2.04453
AL445686.1	0	0	0	0	0	0	0	0	0	0
Y_RNA.5	0	0	0	0	0	0	0	0	0	0
SRRM1	1595.54	2304.18	2118.84	2434.07	2046.61	1738.12	1391.11	1454.6	2312.58	1359.99
AL445648.1	0	0	0	0	0.489003	0.466284	0	0	0	0
CLIC4	11007.2	9589.25	4780.52	6103.79	7020.95	5101.99	9205.33	6547.01	17668.2	14013.5
RNU6.1208P	0.897886	3.72543	0.448654	0.492416	2.04178	2.75472	1.78045	1.06785	1.92885	1.37061
RUNX3	21.5493	36.3229	38.2527	76.1799	16.2056	7.38891	12.2395	191.091	17.9987	2.02176
MIR6731	0	0	0	0	0	0	0	0	0	0
AL445471.1	2.69366	4.65678	0.693841	0.492416	1.06378	0	0	2.61149	1.57155	0
AL445471.2	0	0	0	0	0	1.3702	0	0	0	0.696688
MIR4425	0	0	0	0	0	0	0	0	0.499638	0
AL050344.1	0	0	0	0	0	0	1.18697	0.475795	0.499638	0
AL121994.1	0	0	0	0	0	0	0	0	0	0
AL031432.1	0	0	0	0	0	0	0	0	0.357303	0
SYF2	105.053	107.106	228.382	87.728	227.084	161.919	261.655	163.643	266.459	153.153
AL031432.4	5.38731	11.1763	21.5222	17.0747	6.78589	27.1383	1.1463	12.1166	26.2078	19.8624
AL031432.5	4.48943	0	8.79304	12.4779	8.52748	11.4565	0.593484	9.02934	8.71467	15.7278
RSRP1	325.932	434.012	499.615	536.429	360.186	616.469	591.909	666.014	832.531	1184.26
AL031432.3	2.69366	0	2.14153	2.62707	0.489003	3.23534	3.47956	4.5728	3.00076	0
AL031432.2	2.69366	3.72543	2.73364	4.54174	2.4879	4.59121	0	4.39841	8.35737	6.89858
RHD	1.79577	2.79407	9.69034	10.5083	13.1429	13.293	11.0322	18.1857	8.85407	9.63979
SDHDP6	3.59154	1.86271	1.83634	1.47725	5.14734	6.41336	9.29238	1.54364	5.49894	2.74122
AL928711.1	0	2.79407	0.795574	2.68206	1.46701	0	1.1463	0.475795	2.07118	2.74122
TMEM50A	855.685	1020.77	943.211	891.122	1208.39	953.236	1436.88	1003.69	675.546	1123.57
RHCE	4.48943	1.86271	5.01863	6.18397	9.99449	6.44202	11.0118	13.6021	53.7055	11.5705
AL031284.1	0.897886	0	0.34692	0.547412	1.02089	2.30277	2.3536	0.533923	3.9274	4.85405
TMEM57	412.129	304.554	293.157	290.659	332.768	422.018	339.453	439.413	340.322	349.505
LDLRAP1	508.203	530.873	309.739	333.07	253.001	346.995	295.609	404.337	296.879	363.953
AL606491.1	1.79577	2.79407	1.38768	2.68206	2.57367	3.62998	2.88607	6.89365	21.6414	2.76398
MAN1C1	191.25	227.251	90.8623	140.922	105.066	59.1334	298.678	144.818	2840.77	4509.57
AL031280.1	1.79577	0	0.34692	1.53224	0.489003	0.466284	1.18697	3.3887	14.1381	16.4018
SELENON	3554.73	4999.52	4878.13	6751.53	3215.49	3305.45	3345.94	4328.06	2261.41	3669.42
AL020996.2	0	0	0	0	0	0	0	0	0	0
AL020996.1	2.69366	1.86271	9.48688	6.34896	12.9714	13.745	11.646	14.0779	21.7837	23.9515
MTFR1L	453.432	403.277	514.595	538.351	738.937	630.445	1730.79	663.799	3024.27	2462.77
AL020996.3	0	0	0	0	0	0	0	0	0	0
AUNIP	444.453	281.27	247.697	196.525	160.64	113.396	82.1967	96.1558	25.1389	48.1079
AL033528.2	0	0	0	0.492416	0	0	0	0	0.357303	0
PAQR7	161.619	154.605	263.113	175.126	245.349	266.132	261.858	579.495	278.451	147.42
Y_RNA.6	0	0	0.897307	0	0	0.451957	0.573148	1.06785	0	0
STMN1	2678.39	3290.48	5707.25	2879.41	4954.25	4340.34	3458.83	2662.15	1440.25	2310.98
SNRPFP2	0	0	1.24423	0.492416	0	1.82215	0	2.37898	0.85694	0.696688
AL033528.1	0	0	0.34692	0.547412	1.55278	1.39885	1.18697	0.475795	0.357303	0.696688
MIR3917	0	0	0	0	0	0	0	0	0	0
PAFAH2	234.348	293.377	271.218	233.299	350.629	272.051	349.562	260.809	297.236	389.745
RNU6.110P	0	1.86271	0	0	0.489003	0	0	0.475795	0.357303	0.696688
SCARNA17	0	0	0	0	0	0	0	0	0	0
SCARNA18	0	0	0	0	0	0	0	0	0.85694	0
EXTL1	35.0175	47.4992	74.0301	74.5376	100.493	64.2769	153.239	291.423	467.134	1036.31
SLC30A2	4.48943	0.931357	2.59019	0.984833	24.5872	5.46646	15.2476	27.2624	25.0692	65.0697
AL391650.2	0	0	0	0	0	0	0.573148	1.00972	2.57082	1.34784
TRIM63	0	0	0	0.547412	6.03958	0.903913	99.062	0.533923	1399.93	1588.55
PDIK1L	83.5034	84.7535	95.6489	92.2697	156.9	171.834	121.74	199.83	195.778	143.8
FAM110D	3.59154	2.79407	30.237	25.6657	25.3079	27.0953	39.011	40.6902	12.8541	49.3874
C1orf232	0	0	0.34692	0.984833	0	0	0	0.475795	0	0.696688
AL391650.1	4.48943	4.65678	4.18134	11.3281	6.21112	7.34593	4.09338	14.1942	3.07046	7.5042
ZNF593	0	0	1.24423	2.51708	0.489003	0.932569	1.18697	0	0.714605	0.696688
CNKSR1	256.795	289.652	334.35	446.959	320.346	297.13	241.269	486.764	124.12	78.193
CATSPER4	2.69366	2.79407	2.93711	6.78638	3.01979	5.55243	2.3536	1.00972	0.499638	0
AL355877.1	19.7535	10.2449	9.69034	8.09864	4.08357	1.85081	5.85349	3.50495	33.6386	13.0094
AL355877.3	0.897886	0.931357	0	0.492416	0.489003	0	0	0	0.714605	0
CEP85	1119.66	1372.82	886.71	1151.75	903.069	738.955	578.958	557.466	794.808	708.113
AL355877.2	0.897886	3.72543	0.795574	4.2693	1.55278	3.67296	1.76012	2.49523	5.21427	7.54973
SH3BGRL3	706.636	715.282	1019.88	805.804	638.847	818.296	879.006	1745.95	195.33	438.08
UBXN11	293.609	232.839	407.981	429.769	317.369	555.542	350.05	453.915	206.961	279.376
CD52	1.79577	0.931357	6.9567	6.12898	4.52968	16.9516	1.1463	20.1944	0	0
CRYBG2	257.693	539.256	52.1975	96.814	47.8532	204.545	130.663	408.398	50.1266	0
AL451139.1	0.897886	1.86271	0.795574	0	1.02089	3.62998	1.16663	1.90318	0.357303	0
ZNF683	0	1.86271	1.34596	0.547412	0	0	0	1.00972	0	0.696688
LIN28A	49278.7	50324	31314.8	38834.3	28245	13199.1	7808.63	5356.15	5.92888	2.76398
DHDDS	858.379	775.82	580.372	713.367	565.016	580.357	724.6	939.204	554.043	672.878
AL513365.1	0	1.86271	1.24423	3.22947	4.12645	5.04316	4.66653	2.07756	0.85694	4.76298
AL513365.2	6.2852	1.86271	7.54881	10.9457	2.04178	14.6775	3.5609	6.17457	11.5702	10.8966
HMGN2	719.206	923.906	1655.8	1430.08	1490.28	1731.49	935.374	1060.06	648.007	1048.01
DPPA2P2	0	0	0	0	0	0	0	0.533923	0	0
RPS6KA1	1420.46	1680.17	801.148	1081.56	705.822	632.589	652.35	791.256	303.374	225.021
MIR1976	0	0	0	0	0	0	0	0	0	0
RN7SL679P	0	0	0	0	0.531889	0	0	0	0	0
Y_RNA.7	0	0	0	0	0	0	0	0	0	1.34784
RNU7.29P	0	0	0	0	0	0	0	0	0	0
AL627313.1	0	0	0	0	0	0	0	0	0	0
snoU13	0	0	0	0	0	0	0	0	0	0
AL627082.1	0	0	0	0	0	0	0	0	0	0
AL512408.1	0	0.931357	3.08056	4.48674	4.08357	9.62004	5.23967	4.51467	6.07122	9.57149
ARID1A	6172.96	6502.73	9115.98	10177.5	10697.4	10328.3	6941.43	8881.36	5043.31	5684.14
PIGV	275.651	284.064	279.831	312.438	210.389	220.836	228.334	240.223	200.178	170.069
RN7SL165P	0	0	0.448654	1.03983	0.531889	0.918241	0	1.48551	0.999275	0.696688
ZDHHC18	877.234	870.818	1171.58	1182.59	1003.93	768.417	776.956	1908.1	529.979	399.635
SFN	53.8731	37.2543	28.7658	89.3702	26.6891	184.409	141.675	2188.89	68.2038	2.02176
AL034380.1	0	0	0	0	0	0	0	0	0	0
GPN2	509.999	469.404	498.582	451.333	473.016	512.092	595.722	632.878	595.408	636.204
GPATCH3	162.517	218.869	166.891	163.798	152.688	159.602	178.617	138.458	102.406	140.248
NUDC	1096.32	1696	1222.44	994.718	1116.32	868.793	1306.61	855.884	727.014	767.072
NR0B2	1.79577	0.931357	1.48941	0	0.978006	1.86514	2.94708	0	9.28401	3.41514
KDF1	385.193	275.682	210.512	112.409	146.133	126.832	138.707	252.161	34.4984	6.83027
RPL12P13	0	0	0.34692	0	1.06378	0	0	0.475795	0	0
AL356390.1	0	1.86271	2.14153	0	0.489003	0.932569	0	1.48551	0.357303	0
OSTCP2	0	1.86271	0.448654	0	0.531889	1.35587	0.593484	1.06785	0	0.673921
TRNP1	109.542	200.242	59.4046	72.8404	69.9954	53.667	231.668	75.1476	319.017	193.461
FAM46B	3290.75	1655.95	443.925	532.507	896.609	453.21	590.356	480.717	187.905	276.121
SLC9A1	717.411	719.939	631.915	792.019	713.037	711.277	783.594	1306.89	473.139	544.692
AL590640.2	0	0	0	0	0	0	0	0	0	0
CHCHD3P3	0.897886	0	0.34692	0	1.02089	0.451957	0	0	0.499638	0.696688
NPM1P39	7.18308	4.65678	3.52922	1.58724	0.531889	1.39885	1.78045	0.533923	1.07191	0
SNRPEP7	0	0	0	0	0	0	0	0	0	0.673921
AL590640.1	0	0	0	0	0	0	0	0.533923	0	1.39338
WDTC1	909.558	1107.38	1430.42	1820	2094.27	1939	1737.11	2032.69	1763.89	2156.78
Y_RNA.8	0	0	0	0	1.02089	1.80783	0	0.533923	0.357303	2.0673
FO393419.3	0.897886	0	0	0	1.02089	0.466284	2.29259	2.01944	2.78579	2.09006
TMEM222	657.252	545.775	774.803	731.709	645.735	818.353	620.112	918.909	656.533	688.273
RNU6.48P	0	2.79407	1.59115	4.54174	5.55057	1.3702	2.3536	2.97103	4.3544	0.673921
ACTG1P20	8.97886	9.31357	16.8505	22.7112	21.9277	28.0708	21.6945	24.5347	18.4954	19.2113
SYTL1	261.285	139.704	173.404	298.863	177.824	405.726	221.103	1346.1	311.299	79.3587
MAP3K6	490.246	423.767	281.33	589.96	341.055	314.877	339.164	717.107	373.06	352.806
FCN3	2.69366	6.5195	2.73364	7.77121	8.87056	4.1679	44.393	1.54364	9.21431	2.02176
CD164L2	45.7922	38.1856	26.6426	37.4313	7.23201	5.10047	6.40631	4.39841	2.85549	0
FO393419.1	0	0	0	0	0	0	0	0	0	0
GPR3	255.897	310.142	110.663	148.2	150.749	91.8098	96.2369	59.5734	29.7053	25.4587
WASF2	4044.08	3984.34	3405.58	3941.38	3740.66	3716.88	3148.26	4209.75	2499.2	2263.9
FO393419.2	0	0	0.448654	0	0	0	0	0	1.57155	0
BX293535.1	0	0	6.20285	5.19914	3.59456	7.34593	1.16663	5.46626	16.9965	19.908
AHDC1	806.301	940.67	2286.2	2833.4	1922.01	3031.93	1490.37	3462.23	1312.74	1592.88
FGR	21.5493	12.1076	2.77536	2.07966	1.95601	1.39885	0	0	0	1.39338
AL031729.1	0	0	0	0	0	0	0.593484	0	0.357303	1.39338
LINC02574	0	0	0	1.03983	0	0	0	0	0	0
IFI6	39.507	39.117	28.4372	30.4274	45.5113	55.6037	57.8194	96.7005	53.3482	91.9674
AL445490.1	1.79577	0.931357	0.795574	1.58724	1.06378	0	1.71944	2.4371	1.21424	2.69568
RNU6.949P	0	0	0	0	0	0	0	0	0	0
CHMP1AP1	0	0	0	0	0	0	0	0	0	0
RNU6.424P	0	0	0	0	0	0	0	0.475795	0	0
FAM76A	331.32	228.182	160.573	262.254	207.747	168.189	209.112	137.714	202.976	179.641
AL020997.1	1.79577	0	0.448654	2.18965	2.08467	0.451957	1.1463	0.951591	2.99783	0.673921
RPEP3	0	0	0.795574	0.547412	0	0.451957	0.573148	1.60177	0	0
STX12	247.816	172.301	291.561	251.413	573.123	400.533	661.988	565.264	871.489	822.811
AL020997.2	0	0	1.34596	0.492416	0	0.466284	0	0	1.21424	1.34784
AL020997.3	0	0	1.38768	3.55691	0.489003	2.31709	2.33326	2.61149	5.14164	2.71845
RNU6.1245P	0	0	0	0	0	0	0	0	0	2.78675
PPP1R8	752.428	619.352	749.702	620.83	759.921	734.658	683.171	549.014	428.238	554.195
SCARNA1	3.59154	8.38221	2.63191	8.70105	4.70123	5.91842	5.30068	5.52439	6.21355	6.11082
THEMIS2	380.704	295.24	167.373	177.371	95.3461	40.7829	41.3646	37.9043	9.21431	4.78575
RPA2	714.717	566.265	750.617	538.458	657.42	516.303	589.21	337.649	590.996	486.165
SMPDL3B	1744.59	1451.05	159.303	249.396	89.8385	197.594	95.5824	181.506	79.0564	203.651
AL512288.1	12.5704	8.38221	2.69192	2.62707	2.57367	2.30277	1.78045	1.60177	1.35658	1.34784
XKR8	489.348	488.031	471.467	421.175	286.081	217.3	263.886	207.664	199.037	276.098
EYA3	834.136	1141.84	1056.31	1031.89	1092.23	1018.11	926.635	927.488	908.654	976.078
AL512288.2	0.897886	1.86271	2.63191	3.06449	1.55278	4.12492	2.3536	3.44682	2.92812	2.74122
RN7SL559P	0.897886	3.72543	1.14249	7.99119	2.57367	4.11059	4.68686	3.44682	4.35733	10.2909
SPCS2P4	13.4683	7.45085	11.0963	6.5664	6.12535	9.64869	4.60552	7.66008	8.78437	6.20189
AL137792.2	0	0	0	0	0	0	0	0	0	0
AL137792.1	0	1.86271	0	0	0	0	0	0	0	0
RNU6.176P	0	0	0	0	0	0	0.573148	0	0	0
PTAFR	45.7922	31.6661	11.9936	14.7776	11.7188	11.9515	26.8529	44.1843	3.21279	4.06629
DNAJC8	1776.92	1698.79	1990.86	1502.05	1800.65	1498.32	1885.17	1227.6	1220.21	1309.26
ATPIF1	438.168	393.033	539.375	303.14	420.316	489.459	761.42	583.279	949.959	820.147
AL353622.1	27.8345	40.0483	42.5775	72.4554	20.2034	58.7961	34.3445	46.0983	109.909	59.2094
AL353622.2	0	0	0	0	0	1.83648	0	0.533923	0.999275	0.696688
SESN2	3345.52	2647.85	649.385	1280.06	637.723	1187.97	1005.52	1835.47	596.196	791.606
MED18	76.3203	58.6755	130.354	66.5439	75.7777	43.3944	125.996	39.7493	75.1987	52.7115
PHACTR4	1748.18	1825.46	1309.16	1463.89	1214.02	1486.76	1149.4	1496.81	912.883	1171.47
Y_RNA.9	0	0	0	0	0.531889	0	0	0	0.357303	0
CR391992.1	0	0	1.48941	0	0.489003	1.85081	0.593484	0.533923	1.71388	5.48243
RNU6ATAC27P	0	0	2.14153	0.984833	1.06378	1.3702	0.593484	2.13569	3.42776	2.02176
RCC1	1880.17	2213.83	1697.53	1508.5	1367.38	989.577	783.838	1041.69	323.726	272.774
SNHG3	1075.67	1174.44	647.892	908.464	483.894	396.989	364.81	399.829	228.612	180.852
SNORA73A	0	0	0	0	0	0	0	0	0	0
SNORA73B	12.5704	24.2153	7.36363	13.7927	24.2268	7.36026	14.6134	9.50514	3.00076	0.673921
PRDX3P2	2.69366	0.931357	6.16113	2.18965	2.61656	4.60553	1.1463	4.45654	2.42849	2.09006
AL513497.1	2.69366	4.65678	7.85401	8.37362	26.4574	22.3751	12.8329	29.932	12.7844	4.76298
TRNAU1AP	171.496	171.37	354.656	249.609	340.858	269.611	286.686	262.411	218.192	204.175
SNHG12	182.271	150.88	137.653	142.016	99.6441	136.861	78.8595	173.148	77.0549	60.3295
SNORD99	1.79577	0	2.0398	0.547412	1.06378	5.04316	1.76012	1.00972	0.999275	0.696688
SNORA61	0	0	0	0	0	0	0	0	0	0
SNORA44	0	0	0	0	0	0	0	0	0	0
SNORA16A	0	0	0	0	0	0	0	0	0	0
SNORA16A.1	0	0	0	0	0	0	0	0	0	0
TAF12	280.14	146.223	206.499	138.075	217.424	152.27	224.688	134.975	173.762	154.205
RAB42	129.296	164.85	68.688	89.9752	54.4247	25.2731	31.4787	67.9052	38.8528	18.5601
LINC01715	0.897886	0	1.04076	1.58724	0	1.38453	0	0.951591	2.42849	3.46067
RNU11	0	1.86271	0	0	0	0	0	0	0	0
AL360012.1	0	0	0	0	0	0	0	0	0	0
GMEB1	572.851	539.256	529.134	409.687	427.128	357.376	303.491	370.758	229.895	285.2
SCARNA24	0	0	0	0	0.531889	0	1.1463	0	1.57155	1.34784
YTHDF2	2242.92	2415.94	1945.94	1753.66	2090.98	1954.33	1806.08	1503.6	1160.7	1110.89
OPRD1	79.9118	151.811	38.3076	98.4537	56.149	30.7539	28.1008	23.4668	9.64131	15.8417
AL009181.1	1.79577	2.79407	0	1.03983	0	0	1.1463	1.48551	1.71388	1.37061
Y_RNA.10	0	0	0	0	0	0	0	0	0	0.673921
EPB41	2522.16	3429.26	2164.29	2986.99	2170.36	2705.16	1742.72	1902.08	1043.02	629.738
AL138785.1	1.79577	2.79407	1.83634	2.68206	1.50989	1.86514	0.573148	0	0.714605	0
Y_RNA.11	0	0	0	0	0.531889	0	0	0	0	0
Metazoa_SRP	0	0	0	0.547412	0	0	0	0.533923	0.714605	0
TMEM200B	280.14	187.203	633.509	353.204	530.006	116.093	492.705	167.904	179.917	131.487
AL357500.1	0	1.86271	0.795574	0.547412	0.531889	2.31709	0	1.06785	0.357303	1.39338
SRSF4	1701.49	1566.54	2063.86	1813.71	2258.97	1659.09	1951.98	1497.59	1269.55	1343.87
uc_338	0	0	0	0	0	0	0	0	0	0
MECR	418.415	451.708	339.267	386.541	327.938	362.368	326.124	489.048	444.491	292.249
AL590729.1	5.38731	0.931357	3.03884	3.06449	3.63745	8.71613	5.15833	3.44682	5.71391	0.696688
PTPRU	3711.86	3301.66	2795.76	2419.94	1960.83	3390.6	1165.95	7433.98	1972.25	1988.79
LINC01756	0.897886	0.931357	0	1.53224	0	1.80783	0	2.61149	1.21424	1.37061
AL671862.1	0	0	0	0	0	0	0	0	0	0
AC092265.1	0	0	0	0	0	0	0	0	0	0
AL645944.2	0	0	0	0	0.531889	0	0.593484	0	0.357303	0
AL645944.1	0	0	0	0	0	0	0	0	0	0
LINC01648	0	0	0	0	0	0	0	1.06785	0	0
AL137076.1	0	0	0.34692	0	0.489003	0	0	0	0	0
AL021921.1	0	0	0	0	0	0	0	0	0	0
AL161638.2	0	0	0	0	0	0	0	0	0	0
AL161638.1	0	0	0	0	0	0	0	0	0	0
MATN1	0	6.5195	1.83634	7.71622	2.4879	10.524	7.57294	12.8938	28.0699	16.4701
MATN1.AS1	0	4.65678	2.28499	7.33379	3.99779	16.0764	14.5117	28.0977	30.8499	15.1222
LAPTM5	0.897886	1.86271	4.22306	3.00949	8.91345	9.18241	30.9666	15.9122	15.0647	0.673921
MIR4420	0	0	0	0	0	0	0.573148	0	0	0
AL137027.1	0	0.931357	0	0	0	0	0	0	0	0
LINC01778	0	0	0	0	0	0.466284	0.593484	0.951591	1.57155	15.7734
RN7SKP91	0	0	0	0	0.531889	0	0	0	0.357303	0
AL445235.1	0	0	0	0	0	0	0.593484	0	0	0
SDC3	1213.94	1826.39	2864.79	2470.33	1772.05	2014.28	3455.2	2834.27	2471.36	4447.74
RN7SL371P	0	0	0	0	0	0	0	0	0.357303	0
PUM1	3956.08	5580.69	4619.96	5012.15	5009.54	4537.13	3903.88	4641.09	4022.31	3801.42
AL356320.2	0.897886	0.931357	0.693841	2.13465	3.50879	0.918241	1.73978	2.55336	2.71316	2.0673
AL356320.1	0	2.79407	0	0	0	0.932569	1.1463	1.48551	0.357303	2.04453
SELENOWP1	0	0	0.897307	0.547412	1.9989	0.466284	3.47956	0	1.07191	0.673921
AC114495.1	0	0	0	0	0.531889	0	0	0	0	0.696688
NKAIN1	731.777	1571.2	613.337	1216.58	403.707	721.078	148.857	466.406	23.4976	30.759
SNRNP40	1160.97	1273.16	1109.24	1059.57	964.494	947.037	679.02	673.547	484.148	376.426
AC114495.2	0.897886	13.9704	10.5459	13.5178	12.1649	12.3461	15.8207	8.31026	18.9283	21.233
ZCCHC17	545.914	532.736	589.974	405.473	507.777	398.932	770.058	381.743	492.854	486.657
AL451070.1	0	0	0	0	0	0	0	0.533923	6.14092	0
FABP3	76.3203	132.253	44.3121	55.8783	142.093	60.5036	786.703	70.3897	3349.83	2434.41
SERINC2	893.396	970.474	414.692	415.434	318.175	422.577	458.51	1561.07	335.014	206.06
AC209007.1	0	0	0.693841	0	0	0.466284	0	0	0.999275	0
RNU6.40P	0	0	0	0	0	0	0	0	0	0
LINC01225	0.897886	0	0.34692	0.547412	0	0	0	1.06785	1.35658	0
Y_RNA.12	0	0	0	0	0	0	0	0	0	0
LINC01226	0	0	2.08152	0	1.02089	0.918241	0	2.49523	3.42776	1.37061
AC114488.1	0	0	0	1.64223	0	0.903913	0	2.9129	0	1.34784
TINAGL1	264.876	224.457	53.8721	33.8219	178.759	406.178	332.51	3685.15	601.953	811.71
HCRTR1	11.6725	8.38221	4.18134	8.15364	6.70012	22.5757	5.81282	47.7582	6.42559	12.3582
PEF1	988.572	973.268	1003.55	941.694	1183.86	1240.38	1404.34	1235.26	1223.84	1608.83
AC114488.2	2.69366	8.38221	10.4442	5.80155	2.4879	3.70162	6.44698	22.4571	31.2856	54.8016
AC114488.3	0	0.931357	0	0	0.489003	0.451957	0	0.951591	0.499638	1.37061
COL16A1	198.433	204.898	280.485	223.395	67.8851	237.315	187.112	873.519	1012.28	2319.67
ADGRB2	865.562	1035.67	3393.69	1932.09	1140.95	1075.42	1357.66	1922.21	4855.58	6861.73
MIR4254	0	0	1.04076	0.492416	0.489003	0	0.573148	0.475795	1.92885	1.34784
AL354919.2	0	0	0	0	0	0	0	2.49523	0.499638	0.696688
SPOCD1	87.0949	43.7738	71.4633	106.222	59.5721	98.2948	43.3484	183.06	10.9282	13.0549
AL354919.1	0	0	0	0	0	0.466284	0	0	1.85622	2.0673
AL136115.2	0	0	4.67171	1.53224	3.99779	2.72607	1.18697	4.63093	4.56937	5.5052
PTP4A2	3173.13	2911.42	3531.5	2640.74	3484.12	2267.3	3613.96	2278.25	3633.97	3312.71
AL136115.1	0	4.65678	5.61074	8.48107	3.55168	6.86532	6.48765	12.3599	6.71319	13.0094
AL136115.3	0	0	0	0	0	0.466284	0	0	0.357303	0
KHDRBS1	4337.69	5400.01	5157.12	5188.07	5105.55	5732.62	3680.93	3977.97	2986.44	2813.15
AL445248.1	0.897886	5.58814	6.26286	5.19914	8.78479	11.5998	8.78024	12.1166	17.1388	10.2454
TMEM39B	443.555	537.393	388.321	570.313	364.004	404.873	253.525	370.033	179.536	234.957
MIR5585	0	0	0	0	0.489003	0.903913	0	0	0.999275	0.673921
Metazoa_SRP.1	0	0	0	0	0.531889	0	0	0	0.357303	0
KPNA6	3490.08	4449.09	2903.69	3111.45	3526.91	2568.29	3554.84	2732.72	3326.78	3764.92
AL049795.2	0	0	0	0	0	0	0	0	0	0
TXLNA	2841.81	2814.56	1705.94	2582.49	1703.76	2274.65	1674.86	2714.49	1811.91	2301.48
CCDC28B	130.193	101.518	156.97	129.104	136.036	156.69	185.23	181.411	169.683	270.306
AL049795.1	2.69366	0	2.73364	3.6669	5.06157	8.2785	3.54057	4.87421	3.28543	1.37061
IQCC	44.8943	59.6068	87.5966	127.734	99.4041	114.88	85.8999	107.702	62.2808	69.8555
DCDC2B	4.48943	6.5195	19.6442	27.0905	13.6319	23.451	17.0483	25.8931	26.6407	28.8283
TMEM234	64.6478	54.95	106.589	118.593	80.3073	150.297	123.602	177.732	84.0645	203.16
EIF3I	1959.19	1981.93	2049.26	1537.34	1701.13	1322.03	2350.14	1525.84	1462.01	1543.21
MTMR9LP	211.003	223.526	181.659	258.684	137.546	295.717	109.643	356.22	70.4144	44.5789
FAM167B	25.1408	43.7738	27.6416	61.6798	19.3112	41.6152	15.2069	59.7004	29.0663	8.85204
LCK	2026.53	1165.13	168.938	50.3492	32.1366	4.13925	4.74787	4.03887	0.357303	0
Metazoa_SRP.2	0	0	0	0	0	0	0	0	0	0.696688
Y_RNA.13	0	0	0	0	0.489003	0	0	0	0	0
HDAC1	2493.43	2702.8	3744.47	2911.72	2622.83	2109.85	1485.13	1856.91	1146.49	1487.77
MARCKSL1	5640.52	8359.86	5956.69	5918.03	4210.54	7995.84	3232.88	7532.98	1646.7	2713.83
AL109945.1	0	0.931357	0.448654	0.492416	1.02089	0.903913	0	0	2.21352	2.74122
TSSK3	2.69366	5.58814	13.0578	22.8187	12.3365	27.9562	13.3654	18.0587	51.062	31.3646
FAM229A	52.9753	29.8034	100.923	109.292	120.036	156.539	118.874	151.029	142.415	76.2623
BSDC1	1387.23	1248.95	1180.05	1382.36	1216.22	1640.12	1561.41	1856.28	1427.99	1743.26
GAPDHP20	5.38731	1.86271	1.24423	0.984833	0	2.7404	1.78045	0	2.42849	0.696688
AL356986.1	0	0	0	0	0	0	0	0	0	0
LRRC37A12P	22.4471	20.4898	4.97691	1.03983	1.9989	2.28844	0.593484	0.951591	2.07118	0
RN7SL122P	1.79577	0	0	0	0	0	0	0	0	0
AL033529.1	0.897886	0	1.04076	0.984833	0.531889	0	0	0.475795	1.35658	0
ZBTB8B	214.595	270.093	274.804	222.028	232.909	184.286	129.479	172.567	258.767	256.727
ZBTB8A	145.457	149.017	201.225	233.464	254.434	232.538	148.8	216.947	151.417	168.494
ZBTB8OS	201.126	177.889	192.623	138.46	183.752	164.365	291.353	130.904	239.821	185.1
Y_RNA.14	1.79577	0.931357	3.4692	1.53224	2.08467	3.65864	1.73978	2.85477	6.14385	4.13459
RBBP4	3987.51	4762.03	5896.69	5172.12	6059.52	5902.29	3816.93	3643.35	4899.65	3795.65
SYNC	3.59154	0	1.93807	2.02466	3.19133	4.61986	2.96742	45.4266	43.0649	245.922
AC114489.1	0	1.86271	0	0	0	0	0	0	1.07191	0
KIAA1522	3929.15	3006.42	2609.61	2465.11	1943.71	3082.27	1674.25	4834.23	1464.39	1158.83
YARS	4007.26	4636.29	1658.96	2705.76	1659.46	1519.27	1736.18	1989.84	1773.76	1822.38
S100PBP	1178.92	1273.16	1038.41	884.936	1253.23	771.451	831.381	687.407	1125.37	933.557
FNDC5	19.7535	31.6661	174.88	287.702	68.1424	1185.42	38.5395	387.463	348.165	458.17
HPCA	9.87674	9.31357	6.87326	10.3433	4.61545	6.01871	1.73978	6.95177	1.21424	0.673921
TMEM54	106.848	126.665	393.09	234.999	690.843	286.62	292.19	542.832	107.76	66.4404
RNF19B	496.531	334.357	358.501	428.896	425.3	552.495	346.185	669.926	402.559	410.622
AL031602.1	0	0.931357	0	0	0.978006	0	0.593484	0	0.714605	0.696688
AL355864.1	0	0	0.448654	0	0	0.466284	0	0	1.71388	0.673921
AL355864.2	0.897886	0	0	0	0.978006	0	1.16663	0	2.07118	1.34784
AL020995.1	0	0.931357	0.693841	0.547412	1.50989	1.85081	1.18697	2.37898	7.35516	5.48243
AK2	1296.55	1374.68	1184.72	1169.64	924.439	1064.74	1162.76	1080.84	2217.71	1479.18
Metazoa_SRP.3	1.79577	0	0	0	0.489003	1.83648	0.573148	1.48551	2.92812	2.04453
AZIN2	9.87674	13.9704	74.2804	91.8348	58.2766	154.774	65.9859	263.326	96.9883	158.226
AL662907.1	2.69366	2.79407	7.14188	18.3345	8.21002	53.7099	2.31293	109.674	11.6428	4.83128
TRIM62	304.383	324.112	165.093	383.631	126.462	1165.05	185.783	1573.85	93.5606	257.333
AL662907.2	6.2852	16.7644	11.6101	32.3421	8.78479	55.0658	5.30068	98.8943	7.42779	30.6907
AL662907.3	0	0	0	0	0.531889	0	0.593484	0	0.714605	0.673921
ZNF362	365.439	363.229	373.675	590.282	544.83	1239.98	456.133	1568.16	484.107	783.2
AL513327.3	0.897886	1.86271	9.75035	19.5917	9.54837	34.5845	8.73957	35.4672	7.28546	11.6388
A3GALT2	0	0	0	1.03983	1.46701	5.08614	0.593484	4.39841	0.357303	2.04453
AL513327.1	0	0.931357	38.391	49.4219	46.1718	134.401	45.5393	224.295	93.3427	142.384
PHC2	72.7287	92.2043	859.066	1340.28	1129.71	2552.4	1231.18	3307.96	851.358	1284.86
MIR3605	2.69366	0	0	0.492416	0	1.38453	0.573148	3.44682	0.85694	0
RN7SKP16	0	0	3.32575	2.51708	0.489003	6.45634	2.92675	16.0392	8.21503	22.5809
AL513327.2	0	0	2.18326	6.67639	2.4879	9.63437	1.1463	9.50514	3.78506	2.04453
TLR12P	0	0	0	0	0	0.466284	0	0	0.85694	0
ZSCAN20	153.538	117.351	156.475	195.65	150.603	206.676	125.793	161.366	118.415	191.876
AC115285.1	0	1.86271	0.693841	0	1.02089	0.466284	1.18697	0.533923	1.57155	2.76398
CSMD2	1042.45	1180.03	363.955	351.462	71.5053	23.042	18.6864	136.275	13.3537	114.639
HSPD1P14	0.897886	0	0	0	0	0	0	0	0	0
HMGB4	0	1.86271	1.04076	0.492416	0	0	0	0	0	0.696688
CSMD2.AS1	4.48943	8.38221	0.795574	0	0	0	0	0	0	0
RNA5SP42	0	0	0	0	0	0	0	0	0	0
C1orf94	249.612	187.203	8.14092	18.6644	1.02089	0	2.37394	0.475795	0	0
AC115286.1	0	0	0	0	0	0	0	0	0.357303	0
MIR552	0	0	0	0	0	0	0	0	0	0
SMIM12	347.482	400.483	352.283	281.736	347.524	339.391	571.67	358.203	292.467	411.524
GJB5	7.18308	9.31357	2.83538	1.53224	2.57367	3.19235	4.11371	32.9612	2.78579	0
GJB4	0.897886	0	2.28499	1.09482	3.50879	0	1.18697	3.08728	4.14237	0
AL121988.1	0	0	0	0.492416	0	0	0.593484	0	0.499638	0
GJB3	18.8556	28.8721	7.71055	4.21431	6.78589	5.50945	8.22743	37.1379	10.568	1.39338
GJA4	20.6514	28.8721	97.7619	3.22947	78.5229	1.83648	30.1291	26.2635	12.5665	11.616
AL122010.1	17.0598	14.9017	14.0751	17.2397	13.2716	14.2686	16.9263	21.3311	19.7852	24.0198
DLGAP3	296.302	342.739	138.56	155.809	53.1465	22.9417	22.2067	36.5932	2.50112	17.7724
AC114490.1	26.0387	34.4602	78.3366	67.8587	69.5064	71.1279	49.7954	92.6724	121.982	82.2137
AC114490.2	0	0	0	0	0.489003	1.82215	0	1.42739	2.64345	2.76398
TMEM35B	5.38731	10.2449	2.63191	7.16881	2.4879	1.85081	1.16663	4.63093	0.357303	3.4379
ZMYM6	152.641	113.626	114.341	129.046	118.312	144.839	175.958	144.749	340.755	291.243
RPL12P45	0	0	0	0	0	0	0	0	0	1.37061
ZMYM1	737.164	758.124	520.065	537.803	666.342	488.068	519.375	331.009	316.891	218.419
EFCAB14P1	0	0	0	0	0	0.466284	0	0	0	0
AL590434.1	0.897886	1.86271	0.34692	1.03983	3.01979	1.85081	4.66653	2.97103	1.92885	1.34784
SFPQ	5213.12	7245.02	7939.78	8420.8	11133.2	9334.42	4476.02	7677.11	3427.08	5455.19
Y_RNA.15	0	0	0	0	0	0	0	0	0.357303	0
ZMYM4	2892.09	3569.89	3298.01	2892.16	2814.87	2922.2	2494.16	2083.7	2344.29	2663.59
RN7SL503P	0.897886	0	0.795574	0	0	1.35587	0.593484	0.951591	0.499638	2.0673
SNORA62	0	0	0	0.492416	0.531889	0.466284	0	0	0	0
RPL5P4	11.6725	8.38221	9.38514	10.9457	12.2078	20.6246	10.459	13.0682	8.00006	4.15736
ZMYM4.AS1	0	0	0.693841	1.53224	0.531889	2.75472	0.573148	1.60177	1.07191	2.04453
Metazoa_SRP.4	0	0	0	0	0	0	0	0	0	0
KIAA0319L	3103.99	2360.06	1651.93	1951.96	1532.54	1518.81	1955.89	1822.43	2141.43	2437.49
AC004865.1	0	0	0	0	1.02089	0.918241	0.593484	0	0.357303	0.696688
NCDN	946.371	1207.97	617.882	1027.82	483.508	726.214	634.627	679.532	867.271	1098.68
AC004865.2	6.2852	5.58814	5.36555	6.84137	4.57257	28.4655	3.47956	9.1456	21.4932	6.87581
TFAP2E	11.6725	34.4602	24.0524	34.3693	20.5465	121.079	10.4793	60.3614	65.9176	9.63979
PSMB2	1401.6	1727.67	1207.16	1021.15	1245.63	1730.74	1764.75	1303.66	1041.96	979.256
C1orf216	634.805	803.761	552.371	534.964	323.486	446.057	177.165	374.057	157.326	439.92
CLSPN	550.404	969.542	641.681	720.263	665.81	623.902	296.141	320.139	89.5576	276.039
AL354864.1	0	2.79407	0	0	0.489003	0	0	0	0	0
AGO4	735.368	708.762	1153.74	1357.47	2245.71	1424.32	1367.18	1450.52	1924.5	2017.85
AGO1	3302.42	4813.25	3173.52	3008.12	2998.32	4251.01	2217.77	3617.15	1685.32	2048.73
AL139286.1	0	0	0	0	1.50989	0	0.593484	0	0	2.02176
AL139286.2	0	0	0	0	0	0	0	0	0	0
AGO3	546.812	614.695	982.204	843.22	1260.02	1100.69	1093.4	1108.12	1930.46	1513.85
AL138787.2	1.79577	0.931357	6.01767	3.11948	4.65834	7.30295	4.66653	8.13588	5.64128	6.87581
AL138787.1	0	0	1.93807	1.03983	1.06378	0.918241	0.593484	0	0.357303	0
TEKT2	11.6725	10.2449	63.0721	75.4125	41.9852	50.1229	17.5605	45.263	10.5012	4.83128
ADPRHL2	378.908	366.955	399.232	330.613	369.752	449.177	570.568	554.996	374.579	415.317
COL8A2	117.623	130.39	31.356	34.6967	27.3068	20.1726	8.71923	66.5833	69.4848	36.9609
TRAPPC3	288.221	278.476	449.035	289.29	342.779	369.664	531.598	428.538	555.002	611.815
MAP7D1	940.086	805.624	2418.73	1920.04	2587.65	2320.09	2808.82	2977.59	1955.53	2808.59
RN7SL131P	0	0	0	0	0	0	0	0	0	0
THRAP3	4147.33	4374.58	3290.1	3761.67	2971.85	3065.73	2512.11	2675.46	2398.04	2232.69
UBE2V2P4	0	0	0	0	0	0.466284	0	1.54364	1.07191	0.696688
SH3D21	185.862	164.85	299.459	428.347	232.609	245.45	434.15	500.017	693.585	240.886
EVA1B	86.197	41.9111	308.163	179.503	188.985	126.832	150.987	257.082	127.551	91.8763
AL591845.1	160.722	137.841	146.492	221.473	148.621	123.188	218.119	184.811	456.273	204.712
STK40	1020	1350.47	580.565	994.935	558.994	1681.28	1174.27	2412.52	1003.01	1988.36
LSM10	286.426	185.34	166.142	176.661	138.43	134.701	289.162	143.449	169.253	245.075
RNU4.27P	0	0	0.34692	0	0	0	0	0	0	0
OSCP1	24.2429	20.4898	95.0671	57.7929	72.0973	99.1271	128.451	103.605	118.476	131.738
SNORA63C	0	0	0.448654	0.984833	0	0.451957	0.593484	0	0.357303	0
MRPS15	612.358	665.92	600.293	432.616	438.357	460.642	662.626	400.357	393.295	392.964
CSF3R	0	0	203.831	74.2077	114.34	88.6031	95.8709	337.86	176.245	17.2578
FTLP18	0	0	0	0	0	0	0	0	0	0
AL596257.1	0	3.72543	40.5194	11.5481	0	0.466284	1.16663	0	0	0
AC117945.2	3.59154	1.86271	365.476	51.9939	0	0	0	0	0	0
AC117945.1	0	0	2.93711	0	0	0	0	0	0.357303	0
GRIK3	188.556	353.916	2653.85	264.174	76.4209	56.5506	16.1905	34.2142	2.35585	12.2444
AL031430.1	0	0	0	0	0	0	0	0	0	2.74122
MIR4255	0	0	0	0	0	0	0	0	0	0
RNU6.636P	0	0	0	0	0	0	0	0	0.499638	0.696688
AL353604.1	0	0	0	0	0	0	0	0.533923	0	0
RNA5SP43	0	0	0	0	0	0	0	0	0	0
RPS29P6	0	1.86271	0	0	0	0	0	0	0	0
LINC01137	1.79577	13.039	6.60978	4.15931	3.59456	8.75911	9.98754	27.9815	13.711	13.6605
ZC3H12A	132.887	194.654	148.407	179.835	201.493	135.971	211.733	263.341	66.9837	82.956
MIR6732	0	0	0	0	0	0	0	0	0	0
MEAF6	249.612	205.83	395.486	298.258	350.886	388.51	385.602	357.102	409.171	379.659
MIR5581	4.48943	5.58814	6.05939	12.8054	7.23201	11.0046	8.73957	7.66008	15.1403	17.144
SNIP1	216.39	235.633	329.97	234.889	294.463	277.668	281.036	213.479	198.264	182.828
FTH1P1	1.79577	0.931357	2.48846	1.09482	2.04178	0.451957	0	2.07756	3.35806	1.39338
AL034379.1	4.48943	0.931357	4.42652	5.14414	13.8035	1.35587	5.23967	1.48551	3.8577	1.37061
DNALI1	173.292	167.644	443.594	404.873	356.797	371.781	355.945	320.266	342.59	264.104
GNL2	1494.08	1409.14	1040.97	1059.52	934.982	1006.18	1032.14	738.576	1135.55	829.778
AL513220.1	0	0	0	0	0	0	0	0.533923	0	0.696688
RSPO1	0.897886	2.79407	123.517	48.3245	7.06047	89.0407	2.90641	46.981	7.42779	2.71845
C1orf109	688.678	486.168	548.33	555.748	467.406	500.772	344.977	412.495	376.008	272.819
CDCA8	887.111	890.377	746.519	706.696	1219.21	733.482	483.132	421.132	116.837	235.836
EPHA10	13.4683	57.7441	7.01671	10.5633	2.53079	4.56255	4.11371	4.68905	2.35585	13.6605
Y_RNA.16	0	0	0	0	0	0	0	0	0	0
ACTN4P2	0	0	0	0	0.531889	0	0	0	0.357303	0
AL929472.1	0	0	0	0	0	0	0	0	0.357303	0
MANEAL	106.848	126.665	138.61	122.59	49.2172	61.5365	21.5522	75.3801	20.3545	81.0708
AL929472.3	0	0	0	0	0	0	0	0	0	0
YRDC	279.242	214.212	238.057	164.893	267.619	192.458	259.094	212.76	167.693	180.087
C1orf122	117.623	87.5475	283.151	101.406	209.643	186.36	427.032	277.509	198.035	316.884
MTF1	349.278	488.031	474.741	513.557	434.385	427.692	350.315	414.181	274.39	473.752
AL929472.4	0	0	1.48941	0.492416	0.531889	0.451957	0	0	1.21424	0.673921
AL929472.2	0	0	0	0	0	0	0	0	0	0
INPP5B	990.368	745.085	436.371	573.81	408.434	457.386	382.655	539.407	282.962	237.48
SNORA63	0	0	0	0	0	0.918241	0	0.951591	1.07191	0.673921
RNU6.584P	1.79577	0	0.795574	0	0	2.30277	0.573148	1.00972	0.85694	4.11183
Metazoa_SRP.5	0	0	0	0	0.531889	0	0	0	0.499638	1.34784
SF3A3	2089.38	2700	1894.03	1986.65	1805.75	1801.78	1563.83	1301.93	1118.07	1085.43
RNU6.510P	0.897886	3.72543	3.52922	8.37362	3.14845	3.67296	4.7072	6.41785	2.21352	2.02176
FHL3	852.991	853.123	696.359	974.314	746.916	834.56	544.959	1356.48	383.445	320.322
UTP11	354.665	348.327	330.087	270.245	278.043	241.24	319.884	200.099	240.981	204.266
POU3F1	117.623	289.652	26.0088	98.0687	8.69902	15.6101	0.573148	14.1361	1.71388	9.68533
AL139158.2	7.18308	14.9017	2.73364	8.81104	2.4879	7.79789	1.78045	8.97121	3.35513	2.04453
AL139158.1	1.79577	1.86271	0.34692	0.547412	0	0	0	0	0	0
MIR3659	0	0.931357	0.34692	2.07966	0	0.451957	0	0	0	0.696688
AL139158.3	0.897886	1.86271	0	0	0	0	0	0.533923	0	0.673921
LINC01343	3.59154	4.65678	0	0	0	0.451957	0	1.00972	0	0
AL513479.1	0	1.86271	0.795574	1.47725	0	0	0	0	0	0
RNU6.753P	0	0	0	0	0.531889	0	0	0	0	0
LINC01685	0	0	0.795574	0.492416	0	0	0	0	0.499638	0
AL354702.1	6.2852	8.38221	21.1153	6.18397	15.8453	14.7348	22.288	11.3502	4.642	14.3572
AL354702.2	0	0	0	0	0	0	0	0	0	0
RRAGC	157.13	108.969	181.114	145.023	242.921	172.429	261.041	250.421	224.835	275.939
AL139260.2	0	0	0	0	0	0	0	0	0	0
AL139260.1	0	2.79407	5.61074	13.3528	2.44501	6.00439	8.6989	6.89365	8.35737	10.2226
MYCBP	503.714	521.56	433.655	380.247	453.585	359.011	550.979	328.133	366.251	348.021
AL139260.3	0	0	0.34692	1.03983	0.489003	0.932569	0	1.00972	2.14382	3.46067
GJA9	0	0	1.48941	0	0.489003	2.27411	1.16663	2.01944	1.92885	4.83128
RHBDL2	13.4683	3.72543	3.7744	9.24846	5.59346	5.99006	3.52023	7.71821	9.28694	4.78575
RNU6.605P	0	0	0	0	0	0	0	0	0	0
Y_RNA.17	0	0	0	0	0	0	0	0	0	0
EIF1P2	0	0	0	0	0	0	0	0	0	0.673921
AKIRIN1	5399.88	4139.88	2542.57	2099.87	3015.94	2114.27	3550.39	1885.77	3419.1	3278.62
NDUFS5	413.027	480.58	1081.99	370.279	792.726	581.369	1565.03	517.538	879.12	754.14
MACF1	14973.1	20746.9	6402.16	8950.44	15037.5	10628.6	19909.7	13420.4	16000.8	27569.7
RNU6.608P	0	0	0	0	0	0	2.31293	0	0.357303	2.04453
RNA5SP44	0	0.931357	0	0.547412	0.531889	2.30277	0	0.533923	1.99855	0.673921
AL356055.1	0	0	0.34692	0	1.55278	0	4.66653	0.475795	2.28615	1.37061
AL442071.1	0	0.931357	0	0.492416	1.02089	1.38453	2.37394	1.48551	3.9274	1.37061
HSPE1P8	0	1.86271	0	1.47725	1.02089	1.83648	1.16663	1.48551	2.57082	0.696688
BMP8A	6.2852	5.58814	4.97691	2.62707	13.4002	5.50945	20.918	4.03887	3.71243	8.92034
OXCT2P1	6.2852	4.65678	2.48846	1.03983	1.9989	0.903913	3.47956	1.96131	1.49891	0.673921
AL365277.1	2.69366	8.38221	9.69034	12.3679	13.7177	20.7249	15.1865	15.5634	19.9943	35.6358
PPIEL	0	0.931357	1.34596	3.55691	3.50879	5.50945	1.71944	4.097	8.13947	7.54973
PABPC4	3211.74	4340.12	2584.87	3462.42	2856.21	2622.62	1784.55	2860.59	2764.29	2796.77
AL365277.2	4.48943	10.2449	14.6255	12.9704	8.65614	8.78776	4.09338	16.2718	11.8548	6.89858
SNORA55	3.59154	7.45085	2.97883	8.64605	10.2518	9.60571	4.66653	7.06803	3.35806	8.8748
HEYL	173.292	132.253	123.215	207.248	134.054	96.1496	22.105	155.46	66.6322	81.6764
AL035404.2	0	0	0.795574	0	0	0.932569	0	0.475795	0.357303	0.696688
NT5C1A	0	0	0	0.492416	0	0	0	0	4.35733	3.4379
HPCAL4	17.0598	5.58814	4.81517	10.5083	1.95601	22.4897	2.3536	13.417	154.4	76.663
PPIE	395.968	371.611	517.939	495.605	404.136	433.015	390.7	363.346	371.52	342.903
AL035404.1	0	0	0	0	0	0	0	0	0	0
RNU7.121P	0	0	0	0	0	0	0	0	0	0
BMP8B	32.3239	27.9407	37.7389	43.8928	43.4951	55.0085	48.9172	48.4191	21.9261	8.9431
OXCT2	15.2641	6.5195	1.93807	4.87171	4.16934	1.83648	4.68686	0.475795	1.21424	0.696688
AL033527.3	0	0	1.24423	0.492416	0.489003	0	0	0.475795	0	0
AL033527.1	0	0	0	0	0	0	0	0	0.357303	0
AL033527.5	0	0	0.34692	0	0.531889	0	0.593484	0.533923	0.357303	4.13459
AL033527.4	0	0	0	0	0	0	0	0	0	0
TRIT1	462.411	325.975	373.163	310.903	353.863	314.147	314.377	274.85	329.388	222.426
Y_RNA.18	4.48943	0	0	0.547412	0	2.31709	0.573148	0.951591	1.71388	2.04453
MYCL	595.298	685.479	383.088	397.984	650.308	299.447	279.15	430.125	91.5649	49.9475
AL033527.2	0.897886	0	0.795574	0	0	2.78338	1.18697	0.475795	0	0
Y_RNA.19	0	0	0	0	0	0.932569	0	0	0	0
MFSD2A	272.059	414.454	86.8742	83.0187	69.8239	38.8891	10.459	56.8457	19.849	46.8056
AL663070.1	16.1619	23.2839	7.81229	10.2333	3.46591	6.9083	2.33326	8.01962	1.71388	1.37061
CAP1	2966.61	3163.82	1814.31	2064.22	1886.81	1890.43	2670.05	2822.98	767.34	1555.16
PPT1	3379.64	3256.95	2486.38	2677.2	1866.45	1695.92	1268.04	1095.3	704.714	777.718
AL512599.1	0	0	0	0	0	0.451957	0	0	0	0
RLF	1124.15	996.552	1074.91	1273.98	1293.88	1185.83	1241.44	970.008	1899.26	1347.31
RNU6.1237P	0	0.931357	1.48941	0.492416	3.01979	1.3702	1.76012	0	3.35806	1.37061
TMCO2	0	0	0	0	0.531889	0.466284	0	0	0.357303	1.37061
AL050341.2	29.6302	37.2543	78.7435	56.6431	64.1875	107.757	76.3229	77.3414	151.844	76.9817
ZMPSTE24	876.336	701.312	501.681	453.91	503.463	578.091	713.45	557.942	270.18	545.593
AL050341.1	0	0	0.897307	0	0.489003	1.39885	1.71944	0.475795	2.28615	1.37061
COL9A2	82.6055	94.9984	2835.85	1903.91	1231.87	461.029	81.1317	263.547	15.1403	10.2682
AL031985.2	0	0	0	0	0.531889	0	0.573148	0.533923	0.499638	0
SMAP2	170.598	140.635	227.143	218.684	281.432	228.951	458.551	296.821	337.734	422.717
AL031985.1	0	0	0	0	0	0	0	0	0	0.673921
AL031985.4	0	0	0.795574	0	0	2.30277	0	1.48551	0	0
ZFP69B	405.844	285.927	129.897	226.13	109.621	144.616	70.7744	112.391	48.9938	54.1049
AL031985.3	288.221	218.869	129	163.63	109.467	118.647	64.3274	75.9722	54.7136	50.0158
AL603839.4	10.7746	13.039	6.54977	17.3471	10.7837	5.01451	1.18697	7.71821	4.00003	0
ZFP69	160.722	121.076	139.356	131.396	137.391	135.053	83.9568	122.107	117.628	98.1465
AL603839.3	4.48943	4.65678	3.28403	2.62707	6.74301	2.27411	2.90641	3.56308	13.1388	3.3696
EXO5	148.151	138.772	170.952	149.958	159.233	155.577	114.167	108.944	99.4227	106.771
AL603839.1	0	0	0	1.47725	0	0	0.593484	0	0	0
AL603839.2	8.97886	2.79407	11.7301	4.92416	8.16713	7.34593	8.78024	7.06803	4.5723	6.89858
ZNF684	100.563	68.9204	55.4501	37.3788	58.5768	39.0038	68.2784	33.6221	107.841	53.431
AL356379.1	0	0	0	0	0	0	0	0	2.57082	0
GTF2F2P2	0	2.79407	0	0	0	0	0	0.533923	0.714605	0
RIMS3	2119.01	2252.02	827.74	1807.37	620.102	824.501	767.871	1300.54	1884.78	708.044
AL031289.1	3.59154	1.86271	2.0398	5.58157	1.59567	3.68729	2.90641	2.97103	5.49894	3.41514
NFYC.AS1	28.7323	40.0483	53.979	63.8119	29.563	45.4744	25.7066	34.3304	78.4174	63.2984
NFYC	1792.18	1055.23	813.321	880.509	957.974	1042.7	1169.45	977.218	1764.27	1794.42
MIR30E	0	1.86271	0.34692	0	0.531889	1.39885	0	0.533923	1.21424	0
MIR30C1	0	0.931357	0	0.547412	0	0	0	0.533923	0	0
KCNQ4	125.704	150.88	64.058	117.111	82.289	68.7964	50.779	72.1658	47.062	15.7506
RN7SL326P	0	0	0	0	0	0.451957	0	0	1.21424	1.34784
CITED4	64.6478	132.253	150.202	119.908	169.039	110.612	386.688	149.322	590.429	284.23
AC119677.1	0	0	0	0	0	0	0	0	0	0
AL391730.1	0	0	0	0	0	0	0	0	0.999275	0
UBE2V1P8	0	0	0	0	0	0	0	0	0	0
CTPS1	1425.84	1769.58	1286.91	1617.78	1259.11	1095.94	856.409	1234.62	376.45	593.118
SLFNL1.AS1	52.9753	59.6068	60.3905	110.217	73.5471	114.508	52.9495	125.205	60.3519	94.6175
SLFNL1	33.2218	29.8034	49.8577	47.5021	51.851	79.887	29.7796	105.36	45.2087	65.0014
SCMH1	394.172	423.767	703.225	652.282	1438.14	1224.5	1696.45	844.786	1365.85	1824.69
RPL23AP17	0	0.931357	1.59115	0	5.19023	2.27411	3.52023	0.951591	3.78506	2.74122
AC093151.3	0	0	0	0	1.46701	1.35587	3.54057	1.54364	6.21355	3.3696
AC093151.1	0	0	0	0	0	0	0	0	0.357303	0
FOXO6	36.8133	35.3916	14.9124	14.995	35.4739	29.8213	42.1411	60.8845	144.965	147.443
AC093151.2	0	0.931357	0.795574	0	0	0	0	1.54364	3.14309	3.3696
RNA5SP45	0	0	0	0	0	0	0	0	0	0
EDN2	0	1.86271	1.69288	4.04932	4.9758	0.918241	9.37372	4.93234	13.8563	22.5809
HIVEP3	15.2641	24.2153	22.0909	109.177	41.1102	312.525	76.957	484.29	105.767	370.98
AL445933.2	0	0.931357	0	0.492416	0	1.82215	0.573148	1.90318	0.357303	2.0673
AL445933.1	0	1.86271	0.448654	0.547412	0.489003	11.9371	8.08508	50.6603	6.85552	11.0332
HNRNPFP1	0	0	0	0	0	0	0	0	0	0
AC114492.1	0	0	0	0.492416	0	0	0	0	0	0
GUCA2B	0	0	0	0	0	0	4.13405	0	0	0
GUCA2A	0	0	0	0.492416	1.59567	0	4.66653	0	0	0
FOXJ3	2396.46	2025.7	2061.48	2250.43	2778.08	1902.85	2161.47	2123.53	2856.25	2241.88
AC096540.1	0	1.86271	2.97883	2.62707	1.46701	0.918241	1.16663	5.52439	2.78579	6.15635
RIMKLA	454.33	332.494	68.696	57.8479	51.2763	34.5988	319.921	18.8832	1077.91	849.185
AL513331.1	0	0	0	0.492416	0	0	1.1463	0	0.357303	2.04453
ZMYND12	26.9366	4.65678	8.40439	12.4779	8.08136	8.71613	5.21934	4.87421	26.998	12.3355
PPCS	211.003	155.537	306.353	167.627	219.449	205.119	342.868	269.58	429.017	361.235
CCDC30	13.4683	18.6271	41.5733	32.2897	35.817	49.0041	46.6449	59.3409	104.843	58.285
AL445669.1	0	0	0	0.492416	0	0	0	0.951591	0.85694	0
TMSB4XP1	0	1.86271	0	0	0	0.466284	0	1.90318	0	0
RNU6.536P	0	0	0.448654	0	0	0.903913	0.593484	0	0	0
AL445669.2	0	0	1.14249	0.547412	0	0.451957	0	1.54364	0.714605	1.39338
PPIH	279.242	240.29	365.369	271.885	318.261	247.395	251.562	195.827	167.257	143.732
AC098484.2	0.897886	0	2.63191	3.11948	1.46701	4.57688	2.31293	3.08728	1.07191	0.696688
YBX1	13382.1	13799.9	9429.4	10006.5	7476.69	7040.21	10303.2	5170.98	9001.01	6770.48
CLDN19	519.876	459.159	575.237	527.403	385.949	93.1943	176.324	142.741	52.985	12.3582
P3H1	947.269	1311.35	1319.14	1352.63	1146.68	1296.23	1501.76	1772.72	773.73	1408.17
C1orf50	17.9577	13.9704	15.5045	20.7416	19.8859	25.6678	33.873	13.4859	27.2101	42.3978
AC098484.3	0	0.931357	1.7346	0.492416	0	1.38453	0	1.06785	0.499638	0
AC098484.1	38.6091	34.4602	26.9478	32.8895	37.3441	41.7871	51.3318	32.1947	47.9248	51.2954
TMEM269	19.7535	16.7644	19.2189	26.6506	30.0949	31.5432	27.304	19.4861	24.9298	13.0549
SVBP	135.581	103.381	189.453	116.843	113.791	134.529	137.602	108.737	101.197	87.0905
ERMAP	105.053	73.5772	157.085	121.002	92.2835	124.881	114.066	146.351	228.908	297.103
AL512353.1	17.9577	17.6958	9.69034	8.04365	6.12535	12.4034	9.37372	7.90337	17.4961	25.4132
ZNF691	410.334	377.199	257.99	314.52	176.7	268.93	155.674	204.308	189.474	213.747
AL512353.2	4.48943	0	5.91594	8.92103	3.01979	1.38453	0	4.63093	1.42921	0
AL512353.3	0	0	0.34692	1.09482	0	0	1.1463	1.54364	0.714605	0
ATP6V1E1P1	0	0	1.79461	1.09482	1.50989	0.903913	2.33326	0.475795	1.35658	2.76398
SLC2A1	3455.96	5098.25	2076.41	2430.6	1811.35	1818.63	4228.59	3706.2	5360.78	2583.82
AC099795.2	1.79577	18.6271	1.14249	2.51708	4.04068	1.83648	4.64619	2.07756	5.21427	4.08906
SLC2A1.AS1	49.3837	82.8907	30.5422	44.4427	20.9926	23.9316	33.2592	22.7477	155.833	76.1029
AC099795.1	6.2852	10.2449	4.46824	9.13847	2.08467	5.04316	5.83316	3.98075	27.4947	6.17912
RNU6.880P	1.79577	4.65678	0.34692	0.492416	1.02089	0.903913	0	1.48551	1.71388	0
U6.1	0	0	0	0	0	0	0	0	0	0
AL161637.1	0	0	0	0	0	0	0	0	0	0.673921
FAM183A	13.4683	9.31357	31.0742	48.1621	29.7774	39.0611	14.0199	39.1465	20.7845	17.7951
EBNA1BP2	663.537	685.479	375.007	341.983	295.287	348.056	601.551	366.629	188.042	239.97
MIR6733	0	0	0	0	0	0	0	0	0	0
CFAP57	15.2641	9.31357	29.2328	25.9957	23.2488	51.4215	16.2718	71.8063	9.85628	8.89757
RNA5SP46	0	0	0.34692	0	0.531889	0	0	0	0	0
TMEM125	454.33	428.424	181.634	76.7848	272.69	180.979	276.963	363.055	64.3402	20.5136
C1orf210	290.915	162.987	44.8939	9.13847	55.4885	66.1993	90.7939	128.779	8.99934	0
TIE1	70.0351	95.9297	22.2161	34.9717	41.5992	58.8964	77.201	105.032	37.993	43.2766
MPL	9.87674	3.72543	7.75227	8.75604	7.2749	5.01451	8.78024	2.85477	8.06977	6.15635
AL139289.2	15.2641	13.039	5.61074	10.8907	5.4648	7.38891	1.1463	3.98075	4.92667	2.76398
CDC20	3064.48	4735.02	2195.99	2395.25	3316.02	2536.94	1222.69	1256.26	300.446	560.397
ELOVL1	356.461	494.55	333.768	317.203	395.548	407.384	922.867	967.147	312.237	535.635
MIR6734	0	0	0	0	0	0	0	0	0	0
MED8	211.901	236.565	154.166	141.574	190.332	243.686	332.612	341.408	305.887	378.561
AL139289.1	7.18308	12.1076	3.4875	3.72189	2.04178	9.19674	8.14608	11.7679	6.42852	13.7289
SZT2	719.206	930.425	1234.77	1360.58	1122.58	1354.97	1275.12	1696.93	1381.82	1690.97
SZT2.AS1	0.897886	0	0.693841	0	0	0	0	0	0	1.39338
MIR6735	0	0	0	0	0	0	0	0	0	0
HYI	0	0	0	0	0	0	0	0	0	0
HYI.AS1	0	0.931357	0.448654	0.492416	0.489003	2.7404	1.1463	5.46626	1.71388	1.37061
PTPRF	16101.8	17434.1	14052.5	17952.4	14903.5	21918.9	12508.7	36470.9	3921.33	4991.07
KDM4A	5230.18	4501.25	1478.4	1762.51	1381.33	1763.04	1202.09	2028.31	1120.03	1838.44
KDM4A.AS1	14.3662	19.5585	22.0543	45.205	17.2265	24.3406	13.4264	17.641	20.0699	21.9525
ST3GAL3	70.0351	97.7925	201.079	287.202	183.546	247.487	270.045	155.624	457.705	443.645
AL451062.1	0.897886	0.931357	1.59115	0	0	0.918241	0.573148	0.475795	1.57155	2.09006
U6.2	0	0	0.693841	0	0.489003	0	0	0	3.14309	0
AL451062.2	0	0.931357	1.14249	2.02466	1.02089	2.28844	1.73978	0.533923	5.85625	4.11183
MIR6079	0	2.79407	0.448654	2.73706	0	0	0	0	0	0
SHMT1P1	5.38731	0	6.05939	5.69156	1.50989	11.4708	4.05271	3.44682	9.28401	5.48243
ARTN	127.5	162.056	18.9503	24.4635	22.5883	8.71613	22.7391	6.05831	9.64131	22.672
AL357079.1	3.59154	2.79407	0.795574	0.492416	1.9989	0.918241	0.573148	1.00972	3.07046	0.673921
IPO13	1099.91	1259.19	691.163	872.618	736.235	905.206	1104.78	952.361	788.789	1157.45
DPH2	1343.24	1602.86	665.895	799.838	459.453	552.329	495.9	503.675	491.634	465.369
ATP6V0B	417.517	362.298	701.813	322.892	617.502	464.3	946.878	659.32	587.714	764.217
B4GALT2	882.622	965.817	1518.35	1330.74	1123.51	1029.33	1029.48	1031.59	609.253	945.447
CCDC24	198.433	161.125	196.071	186.734	142.942	144.393	167.3	185.16	95.2715	86.28
SLC6A9	1541.67	994.689	299.871	639.604	220.127	526.139	301.235	817.323	172.326	181.367
AL139220.2	17.0598	8.38221	4.9169	10.8357	11.7188	9.63437	12.2191	4.45654	19.425	8.85204
AL139220.1	0	0	0	0	0.489003	0.466284	0.573148	0	0.499638	0
KRT8P47	0	0	0	0	0	0	0	0	0	0
RN7SL479P	0	0	0	0	0.531889	0	0	0	0	0.673921
KLF17	4.48943	0	0	0	0.489003	0	0	0	0.357303	2.02176
AL356653.1	0	4.65678	2.83538	0.492416	2.04178	0.918241	0.593484	0	0	0.696688
KLF18	18.8556	1.86271	0	1.96967	0	0	0	0	0.714605	0
AL359839.1	0	0	0	0	0	0	0	0	0	0.696688
Y_RNA.20	0	0	0	0	0	0	0	0	0	0
OOSP1P1	0	0	0	0	0	0	0	0	0	0
AL035417.1	0	0.931357	0	0	0	0	0	0	0	0
AL035417.2	0.897886	0	1.34596	0.547412	0.978006	0.903913	1.71944	0	1.71388	1.37061
DMAP1	756.02	774.889	708.048	698.802	843.368	819.968	763.668	788.786	546.638	754.19
ERI3	984.083	1237.77	933.508	1054.59	923.89	1124.1	864.023	904.361	764.577	907.926
ERI3.IT1	14.3662	18.6271	16.1384	37.0488	9.05937	22.8987	12.7923	25.8931	32.8543	32.9174
RNU6.369P	0	0	0	0	0	0	0	0	0	0
RNF220	2003.18	2061.09	1533.15	1484.92	1161.85	1115.16	893.27	1034.49	532.921	599.229
MIR5584	0	0	0	0	0	0	0	0	0.499638	0.673921
TMEM53	210.105	125.733	192.396	147.658	107.854	163.332	161.975	197.985	154.197	102.122
C1orf228	10.7746	5.58814	43.9783	33.7119	27.4354	64.6285	21.5115	49.8358	25.7111	20.5819
RNU5F.1	0	0	0	0	0.531889	0.932569	0	0.475795	1.07191	0
RNU5D.1	0	0	0.448654	0.492416	0	0	0.593484	0	0	0
KIF2C	1666.48	1653.16	1341.7	1153.37	1815.97	1259.65	733.201	736.763	257.387	417.453
AL592166.1	8.97886	4.65678	3.1823	8.37362	7.10335	11.0475	6.44698	7.54383	0	2.76398
RPS8	13115.4	10825.2	16409	13393.2	10261.1	9409.47	7457.96	8935.95	9032.54	4907.05
SNORD55	0	0	0	0	0	0	0	0	0	0
SNORD46	3.59154	3.72543	3.38576	5.85654	2.04178	2.7404	8.7599	5.52439	1.92885	0.696688
SNORD38A	0.897886	2.79407	1.59115	1.03983	1.9989	2.72607	1.73978	0.951591	2.07118	2.71845
SNORD38B	0	0	0	0	0	0	0	0	0	0
SNORD38B.1	0	0	0	0	0	0	0	0	0	0
RPS15AP11	0	0	1.14249	2.46208	3.68033	5.48079	1.18697	1.96131	1.35658	1.37061
BEST4	14.3662	11.1763	10.7911	10.1783	9.2738	12.9127	7.61361	9.9228	4.642	2.74122
PLK3	227.165	223.526	105.793	169.872	161.678	382.569	263.476	848.889	102.839	206.356
TCTEX1D4	0	4.65678	1.93807	0.547412	1.59567	15.6388	4.09338	70.7384	2.42849	12.9411
BTBD19	21.5493	13.9704	37.7389	59.5452	38.1762	142.751	49.1002	298.048	49.7752	134.32
PTCH2	22.4471	39.117	80.7182	57.628	73.0581	37.5906	34.4055	26.496	31.1375	59.1183
RNU5E.6P	0	0	0	0	0	0	0	0	0	0
AL136380.1	0	0	0.34692	1.58724	1.59567	1.3702	1.18697	1.42739	0.357303	2.71845
EIF2B3	360.95	271.025	334.292	240.035	309.991	183.433	444.897	192.333	339.941	309.07
RNA5SP47	0	0.931357	0	0.984833	1.06378	0.451957	0	0	0.357303	0
CCNB1IP1P1	0	0	1.38768	0.547412	0.531889	0	0	1.48551	0.714605	3.4379
PPIAP35	1.79577	0	0.795574	0	0	0.918241	0.593484	0	1.35658	0.696688
MRPS17P1	0.897886	0	0.693841	0	3.06267	0	1.73978	0	3.8577	4.06629
HECTD3	1584.77	1806.83	1299.29	1461.05	1020.13	786.473	1269.54	1064.6	688.161	728.239
UROD	1095.42	828.907	1041.1	737.293	755.125	655.101	1014.62	513.012	671.226	917.051
ZSWIM5	83.5034	130.39	301.113	393.162	179.214	399.349	317.466	257.849	289.89	449.96
OSTCP5	0	0	1.04076	0	1.50989	1.38453	0	0.475795	0.999275	2.02176
LINC01144	12.5704	3.72543	9.85209	12.5879	6.12535	12.4464	6.50799	4.45654	13.9957	4.08906
HPDL	219.084	580.235	188.895	433.163	47.8104	269.224	37.3525	130.915	27.3524	22.4898
MUTYH	1292.96	1112.97	704.354	910.232	455.644	551.885	268.451	433.783	165.907	199.836
TOE1	404.049	333.426	247.225	271.013	167.829	323.393	139.545	165.176	81.7754	159.573
TESK2	422.006	338.082	296.141	334.49	331.704	222.2	237.704	261.797	147.478	61.518
PPIAP36	0	0	2.38672	1.03983	0	1.83648	0.573148	0.533923	0.499638	0
CCDC163	73.6266	48.4305	82.8649	77.9846	63.5698	66.4793	55.8763	53.2826	35.3495	25.9733
MMACHC	136.479	116.42	147.108	175.508	175.765	187.436	154.63	130.624	251.191	224.825
PRDX1	1668.27	2842.5	2156.63	1372.18	1690.77	1043.75	2437.95	858.612	943.739	1823.36
HMGB1P48	0	0	0.34692	0	0	0	0	0	0	0
AKR1A1	1788.59	2077.86	1962.47	1701.87	1688.07	1416.54	1316.58	1441.64	1408.84	1217.78
AL355480.3	0	0	0	1.47725	0.489003	3.24966	0	0.475795	1.35658	0
AL355480.1	0	0.931357	1.59115	1.58724	3.01979	1.82215	0.593484	1.54364	2.35585	2.09006
NASP	6671.29	11204.2	7066.2	7826.65	5324.28	6080.54	3006.31	3332.6	1827.4	2668.78
AL355480.2	0	0	0	2.46208	0	0	0	0.533923	0	0
AL355480.4	0.897886	0	0.897307	2.13465	0.489003	0	0	0.475795	0	0
CCDC17	18.8556	30.7348	11.7301	20.1942	29.2455	49.994	47.8116	48.9531	24.9268	36.8926
GPBP1L1	2119.01	2225.94	1544.62	1567	1720.03	1599.1	1555.61	1604.8	1797.29	1624.51
RPS15AP10	6.2852	7.45085	10.7911	9.41345	7.7639	22.8987	4.66653	24.0589	23.213	13.0094
AL604028.2	14.3662	11.1763	19.5058	33.6045	11.6759	49.8364	19.2596	53.2718	26.7801	32.8035
TMEM69	650.069	746.948	448.956	511.865	464.145	446.416	522.509	390.572	580.637	475.624
IPP	119.419	106.175	238.101	242.495	277.125	337.677	279.646	264.731	455.373	368.548
AL604028.1	2.69366	2.79407	6.6515	6.12898	7.50659	8.65882	8.73957	9.2145	12.8541	10.2682
AL603882.1	0	0	0	0	0	0	0	0	0	0
MAST2	2057.06	2288.34	2015.64	2278.09	2526.95	1957.74	2430.93	2742.18	3188.79	3396.44
TMA16P2	0	0	0.34692	1.53224	0.489003	0	0	1.00972	0	0
PIK3R3	267.57	308.279	252.856	393.865	239.052	962.898	254.838	728.453	360.601	1814.09
AL358075.4	0	0	0	0	0	0	0	0	0	0
AL358075.1	0	0	0	0.547412	2.53079	0.903913	1.1463	0	2.35585	2.76398
AL358075.3	0	0	0	0	0.489003	0.918241	0.593484	0	0	2.0673
AL358075.2	0	0	0.448654	0.984833	0	0.918241	0.573148	0	1.85622	0.696688
TSPAN1	1.79577	0	11.1798	15.215	11.7617	11.4852	7.61361	30.5348	12.9267	13.0322
AL672043.1	0	0	0	0	0.489003	0	0	0	0	1.34784
POMGNT1	1118.77	969.542	1730.02	1747.82	1555.35	1574.97	1754.96	1809.67	2386.53	2480.38
LURAP1	65.5457	45.6365	38.7614	67.4788	25.9684	33.4513	50.4536	39.9129	344.232	69.9921
RAD54L	489.348	853.123	589.171	750.208	438.409	435.031	223.868	274.073	75.7101	117.153
LRRC41	2060.65	1717.42	2936.96	2958.76	2611.03	3075.8	2931.28	4089.99	3585.23	3131.27
UQCRH	568.362	707.831	1135.46	512.185	879.777	485.628	1635.78	429.105	1481.61	666.252
NSUN4	648.273	426.561	431.49	510.163	387.664	436.042	448.072	426.515	569.148	561.116
AL122001.1	0	0	1.04076	0.492416	0.489003	1.35587	2.33326	1.96131	1.35658	0.696688
FAAH	254.102	213.281	254.813	162.536	262.447	123.963	171.047	127.769	144.544	209.097
FAAHP1	0.897886	4.65678	9.40343	5.74655	7.06047	0.918241	3.52023	3.14541	5.14164	2.0673
LINC01398	0.897886	0.931357	6.87326	4.15931	0.531889	1.39885	1.18697	0.533923	0	0
DMBX1	0.897886	3.72543	333.247	563.694	114.932	0.918241	19.8531	14.1942	0.357303	0
AL136373.1	0	0	0	0.547412	0	0	0	0	0	0
MKNK1.AS1	8.08097	4.65678	7.794	6.12898	2.53079	8.24984	2.33326	8.26291	9.42634	10.9193
KNCN	0	0	0	0.547412	0	0	0	0	0	0.696688
MKNK1	403.151	325.975	236.596	297.881	207.095	298.199	362.127	345.44	284.098	345.908
MOB3C	131.091	143.429	71.0747	84.9884	50.2381	96.3723	65.8842	183.885	173.683	169.054
ATPAF1	1315.4	1131.6	1042.88	1179.14	1555.45	877.101	1414.23	709.806	1660.43	2380.73
NENFP1	2.69366	0.931357	0.448654	3.6119	4.12645	0.466284	0	0.475795	2.71316	2.76398
TEX38	1.79577	1.86271	5.01863	5.85654	4.52968	7.31727	7.02013	6.53411	4.78727	9.52596
EFCAB14.AS1	8.97886	8.38221	7.71055	10.1233	12.5253	14.6489	7.57294	12.952	8.1424	7.52696
EFCAB14	1600.93	1621.49	1242.58	1354.33	1415.2	1200.62	1725.11	1585.4	2162.32	2387.25
AL593856.1	0	0	0	0	0.489003	0	0	0	0	0
CYP4B1	4.48943	2.79407	3.93615	0.984833	15.442	1.83648	3.49989	2.97103	0.499638	2.0673
CYP4Z2P	0	0	0	0	0.531889	0.451957	0	0	1.21424	0.696688
AL731892.1	0	0	0.795574	0	2.04178	0	0.573148	0	0	0
CYP4A11	0	0	0.897307	1.53224	6.08246	0	0	1.06785	0	0
CYP4A26P	0	0	0	0	0	0	0	0	0	0
CYP4A43P	0	0	0	0	0	0	0	0	0	0
CYP4A27P	0	0	0	0	0	0	0	0	0	0
CYP4A44P	0	0	0	0	0	0	0	0	0	0
CYP4X1	28.7323	32.5975	32.1282	21.7264	155.725	4.57688	87.8875	13.4859	1.21424	5.48243
CYP4Z1	1.79577	2.79407	2.28499	2.07966	2.57367	2.75472	0.573148	1.60177	1.21424	1.37061
AL450996.1	0	0	0	0	0	0	0	0.533923	0	0
CYP4A22.AS1	14.3662	17.6958	16.2584	26.1607	8.16713	10.9329	4.72753	9.1456	0.999275	4.06629
CYP4A22	3.59154	0	1.83634	5.30913	0.978006	0	0	0.475795	0.714605	1.37061
MTND1P34	0	1.86271	0	0	0	0	1.18697	0.533923	0.499638	0
LINC00853	3.59154	0	2.28499	0	1.06378	0.903913	0	1.42739	0.499638	0
PDZK1IP1	0	0	0	0	1.50989	0	0	0	0.499638	0
TAL1	1.79577	0	8.66787	13.2453	56.7667	4.56255	37.1085	12.1166	4.71464	0
AL135960.1	0	0	0	0	0.531889	0.451957	1.73978	0	0	0
STIL	1403.4	1134.39	812.027	911.749	1227.74	747.564	521.874	443.553	131.838	216.01
CMPK1	321.443	380.925	482.999	386.483	696.368	609.849	1081.63	981.264	1029.41	1029.42
LINC01389	0	0	1.48941	0.492416	4.12645	5.52377	7.65428	4.51467	3.28543	4.13459
FOXE3	0	2.79407	0.448654	7.2788	1.59567	22.0521	1.76012	41.9797	0.499638	0
FOXD2.AS1	5.38731	1.86271	40.0473	50.1292	16.6345	42.2248	5.30068	41.4566	3.64273	3.4379
FOXD2	0	0.931357	20.0328	16.9097	3.63745	16.557	1.18697	21.6799	0.357303	2.04453
AL356458.1	0	0	0	0	0	0	0	0	0	0
RPL21P24	0	0	0	0	0	0	0	0	0	0
ATP6V0E1P4	0	0	0	0	0	0	0	0	0	0
LINC01738	0	0	0	0.547412	0.978006	0.918241	0.593484	0.533923	0	0
TRABD2B	127.5	88.4789	465.974	285.785	307.469	363.33	168.897	41.5255	105.2	853.01
AL691459.1	0	0	0	0	0	0	0	0	0	0
AC096541.1	0.897886	0.931357	1.34596	0.984833	5.37903	2.28844	2.3536	1.06785	0.357303	7.54973
AL356289.1	0	0	4.32479	3.06449	5.55057	7.38891	0.593484	0.475795	3.21572	18.378
AL356289.2	0	0	0.795574	0	0	0	0	0.475795	0	0.673921
CYP46A4P	0	0	0.897307	0.547412	1.55278	2.31709	0	0	0.85694	6.80751
SKINT1L	1.79577	1.86271	36.8782	11.6581	12.5682	15.1725	4.09338	6.53411	5.85625	8.22365
AL356289.3	0.897886	2.79407	15.6846	2.62707	3.72322	4.13925	1.76012	1.42739	0.85694	8.20088
AL109659.1	1.79577	0	7.95574	1.53224	4.16934	5.49512	0.593484	0	2.50112	13.0094
SLC5A9	18.8556	16.7644	296.382	40.9907	160.194	56.5793	59.5389	20.1944	18.6407	45.139
AL109659.2	0	1.86271	22.4978	4.59673	5.63635	8.73045	8.14608	3.44682	3.71243	4.76298
AL109659.3	0	0	0	0	0.531889	0.466284	2.31293	0	0.499638	0.696688
SPATA6	320.545	267.299	885.158	514.942	382.32	318.278	234.635	204.101	171.757	158.945
PPP1R8P1	0	0	1.38768	2.51708	0	1.38453	1.71944	1.00972	1.21424	0
RNU6.723P	0	0.931357	1.69288	0.492416	0	0.918241	0	0	0.85694	0
AL356968.2	21.5493	18.6271	6.56806	12.7504	6.21112	13.7736	7.02013	10.3297	14.6435	25.4132
RNU4.61P	0	0	0	0	0	0	0.573148	0	0	0
AL356968.1	0	0	0	0.547412	0	0	0	0	0	0
AGBL4	22.4471	8.38221	28.7607	18.3869	32.7972	11.0475	19.8124	8.37916	5.78655	10.9193
BEND5	87.0949	83.8221	87.3931	78.6445	103.985	113.833	97.3832	79.0013	87.6287	106.748
AC092264.1	0	0	0.897307	0	0.489003	0	0	0	0.357303	0.673921
AL590432.1	0	0	0	0	0	0	0	0	0	0
AGBL4.IT1	0	0	0	0	0	0	0	0	0.357303	0
AL390023.1	0	0	0	0	0	0	0	0	0	0
ZNF859P	0	0.931357	0	0	0	0	0	0	0	0
AL645730.1	0	0	0	0	0	0	0	0	0.499638	1.34784
MTND2P29	0	0	0.448654	0	0	0	0	0	0	0
ELAVL4	15.2641	19.5585	29.598	29.2802	43.1091	9.16808	12.2395	9.26185	1.42921	0.696688
AL583843.1	0	0	0	0	0	0	0	0	0.357303	0
AL592182.2	0	0	0	0	0.489003	0	0	0	0	0
AL592182.1	0	0	0	0	0	0	0	0	0	0
AL596275.2	0	0	0	0	0.489003	0	0	0	0	0
AL592182.3	0	0	0	0	0	0	0	0	0	0
AL596275.1	0	0	2.0398	0	0.489003	0.466284	1.71944	0	4.215	0.673921
HMGB1P45	0	0	0	0.547412	0.489003	0	0	0	0	0.673921
FCF1P6	0.897886	0	0	0	1.02089	0	0	0	0.357303	0
DMRTA2	1.79577	0	78.8716	3.55691	2.9769	3.20668	0.573148	27.3894	0	1.39338
AL049637.2	0	0	0	0	0	0	0	0	0	0
FAF1	1042.45	734.84	756.997	601.398	858.141	611.814	868.856	555.272	926.638	765.519
AL049637.1	2.69366	2.79407	5.46729	5.08915	5.14734	7.7549	4.66653	5.52439	12.9267	6.78474
RNU6.1026P	0	0.931357	0	1.09482	0.531889	0.466284	0	0	0.714605	0
PHBP12	6.2852	6.5195	1.04076	3.06449	2.04178	0.918241	1.76012	5.94206	10.995	0
MRPS6P2	0.897886	0	0.795574	0.492416	0.978006	0	0	0.533923	0.714605	0
CDKN2C	0	0	0	2.07966	5.63635	2.75472	2.86574	6.00018	14.4983	44.5789
MIR4421	0	0	0	0	0	0	0	0	0	0
MIR6500	0	0	0	0	0	0	0	0	0.499638	0
C1orf185	0	0	0	0	0	0	0	0	0	0
Y_RNA.21	0	0	0	0	0	0	0	0	0	0
CFL1P2	0	0	0	0	0	0.918241	0	0.951591	0	0
LINC01562	0	0	1.59115	0	1.50989	1.38453	0.593484	0	1.78651	8.22365
RNF11	780.263	674.302	1249.29	870.153	1497.07	817.494	2185.02	1044.76	1926.65	1749.32
AL162430.1	12.5704	12.1076	30.417	21.7264	19.3541	21.1339	30.8039	7.42757	13.5687	4.80851
AL162430.2	0	0	0.34692	0	4.57257	0	1.76012	0	1.57155	0
TTC39A	205.616	264.505	87.448	68.9561	134.964	33.0853	196.059	68.9623	505.642	533.831
TTC39A.AS1	0	1.86271	0	0	1.02089	0.451957	0	0	2.42849	4.15736
EPS15	2528.45	1620.56	898.385	994.55	1470.68	981.908	2421.83	1513.64	3077.85	2434.02
AL671986.1	4.48943	5.58814	2.14153	2.51708	4.04068	5.50945	8.24777	6.05831	6.85552	8.82927
RNU6.877P	0	0	0.448654	0	1.02089	0	0	1.48551	1.35658	0.696688
AC104170.2	0	0	0	1.09482	0	0.466284	1.1463	0.533923	3.00076	2.78675
AC104170.1	0	0	0	0	0	0	2.29259	0	0.999275	0.696688
RNU6.1281P	0	0	0	0	0	0	0.593484	0	1.85622	0
CALR4P	0.897886	0	0	0.492416	1.02089	2.30277	5.32102	1.48551	23.5035	11.5933
OSBPL9	2292.3	2061.09	2274.22	2099.59	4612.85	2983.4	6835.3	3483.24	6464.08	5654.79
GAPDHP51	0	0	0.34692	0	1.02089	0.918241	1.73978	0	1.35658	0.696688
SLC25A6P3	0	0.931357	0	0	0.489003	0	0	0.475795	0.357303	0.696688
SNORA26	0	2.79407	0	0	0	0.451957	0	0	0.357303	0.673921
NRDC	3833.07	4145.47	2441.39	2607.02	2920.19	2725.77	3160.55	2651.49	3595.38	3448.6
AL050343.1	3.59154	17.6958	8.09919	12.3129	17.1407	16.428	17.5605	17.7573	12.857	20.5591
AL050343.2	0	0	0	0.547412	0.531889	1.38453	1.1463	0.951591	1.21424	0
MIR761	0	0	0	0	0	0	0	0	0	0
TSEN15P2	1.79577	0.931357	1.14249	0	0.978006	1.38453	0	0	1.21424	0.696688
RAB3B	3331.16	3823.22	3521.18	2833.11	3149.27	1210.69	2719.67	2171.28	346.091	678.679
RNA5SP48	0	0.931357	1.59115	0.492416	3.91202	1.35587	0	2.07756	0	0
AL445685.2	0	0	0.795574	0.547412	1.06378	0.466284	0.593484	1.60177	0	0
RN7SL290P	0	0	0	0	0	0	0	0	0	0
TXNDC12	1077.46	987.238	817.367	654.482	758.3	645.509	903.404	667.769	530.784	465.174
KTI12	130.193	114.557	144.8	116.241	102.432	130.376	111.464	138.749	88.5612	118.751
AL445685.1	3.59154	2.79407	1.14249	0	3.99779	1.80783	0.573148	2.07756	1.07191	0.696688
TXNDC12.AS1	2.69366	7.45085	0.34692	3.00949	1.02089	2.75472	2.37394	0.951591	3.9274	0.673921
BTF3L4	2326.42	1721.15	1259.52	1345.9	1568.78	1436.91	1473.29	1100.6	1815	1127.19
ZFYVE9	1668.27	1327.18	1468.1	1458.05	1457.65	954.095	865.372	933.637	995.283	933.102
RN7SL788P	0	0	0	0.492416	0	0.918241	0	0	1.21424	0.673921
AL139156.2	2.69366	0	2.63191	0	4.61545	0.466284	4.64619	0	0	0.673921
AL139156.1	2.69366	0	0.34692	0	2.08467	1.39885	0	2.01944	0.714605	1.37061
PDCL3P6	0	1.86271	0	0	1.02089	0.918241	1.73978	0.951591	0.714605	0
AL139156.3	0	0.931357	0.693841	0.492416	0	0	0	0	0.85694	1.39338
DNAJC19P7	0	0	0.448654	0	1.02089	0.466284	0	0	0.999275	0.673921
ANAPC10P1	0	0	1.34596	0	0	0.932569	0.573148	1.42739	0.714605	0
CC2D1B	342.094	384.65	537.605	581.759	470.7	678.473	513.521	730.963	321.67	508.45
AL513218.1	0	3.72543	2.83538	2.62707	2.53079	1.35587	2.3536	3.44682	1.85622	0.673921
PLA2G12AP1	7.18308	3.72543	3.4875	2.68206	3.01979	7.37458	3.45922	4.5728	5.28398	4.06629
ORC1	1268.71	1316.94	782.636	948.955	496.823	600.472	223.623	327.487	48.2066	71.9456
PRPF38A	994.857	924.837	999.54	916.846	1051.14	1039.99	919.391	742.884	785.893	662.049
ZCCHC11	1536.28	1474.34	1780.39	2097.3	1760.57	2134.14	1591.23	1872.43	1934.62	1626.57
AL591167.1	0	0.931357	0.34692	1.03983	1.02089	6.86532	0	1.06785	2.71316	2.09006
EEF1GP7	0	0	3.28403	1.09482	0	2.75472	0.573148	1.00972	0.357303	0.696688
GPX7	108.644	91.273	156.219	125.374	39.7719	46.8589	26.7105	56.9146	27.7097	30.1079
FAM159A	2.69366	4.65678	8.64958	15.105	5.42192	2.75472	2.90641	7.84524	0.714605	1.37061
COA7	784.752	794.447	481.671	489.589	388.462	375.984	251.358	258.393	355.747	373.775
NDUFS5P3	0	0	0	0	0	0	0	0	0	0
RN7SL62P	0	0	0	0	0	0	0.573148	0	0	0
ZYG11B	1211.25	1182.82	1236.82	1207.71	1474.24	1270.62	1946.71	1109.45	3559.75	2374.33
RNU2.30P	0	0	0	0	0	0	0	0	0.999275	0
RPS13P2	1.79577	0.931357	2.28499	1.53224	2.08467	2.75472	0	0.533923	1.57155	0
RNU6.969P	0	0	0.693841	1.47725	1.02089	1.82215	2.90641	0.533923	0.357303	1.34784
ZYG11A	145.457	108.037	34.7001	64.8492	27.0322	25.1872	11.0932	30.593	8.5694	15.7278
AC099677.4	2.69366	3.72543	0.693841	0.547412	0.489003	0.466284	0.573148	1.06785	0.499638	0
ECHDC2	384.295	396.758	435.633	298.323	520.861	308.343	235.578	348.734	598.609	426.592
AC099677.1	17.0598	7.45085	9.64862	6.12898	7.72101	10.481	4.68686	9.1456	11.9275	6.83027
AC099677.2	0	0	0	0	0	0	0	0	2.07118	0
SCP2	261.285	233.771	555.313	243.21	659.127	276.032	893.144	383.461	1705.96	1708.5
MIR1273F	0.897886	0	0	0	0.531889	0	0	0	1.85622	0.673921
MIR5095	0	0	0	0	0	0	0	0	0	0
MIR1273G	0	0	0	0	0	0	0	0	0	0
AC099677.3	0	0	0.693841	0	0	0.466284	0	0	0	0.673921
AL445183.3	0.897886	0	1.48941	0.984833	0.978006	0.903913	0.573148	0.951591	0.714605	0.696688
TUBBP10	0	0	0	0	0	0	0	0	0	0
PODN	11.6725	9.31357	128.969	9.35845	249.732	12.4321	41.9987	45.7387	210.171	459.372
AL445183.1	0	0	0	0	0	0	0	0	0	0
HIGD1AP11	0	0	0	0	0	0	0	0	0	0
SLC1A7	0	0	19.519	1.58724	29.9662	0.451957	2.3536	3.50495	33.136	29.2973
AL445183.2	0	0	3.38576	1.03983	5.10446	0	0	1.00972	4.56937	0.696688
AL606760.4	0	0	0.448654	0	0	0.451957	0	0	0.357303	0
CPT2	520.774	519.697	337.381	445.479	407.91	376.894	662.643	334.725	573.677	465.916
AL606760.2	5.38731	0	2.73364	1.53224	2.4879	1.83648	1.73978	3.02916	1.49891	2.09006
C1orf123	385.193	376.268	641.762	519.081	471.996	403.116	370.375	338.869	401.452	378.698
AL606760.3	1.79577	0	1.14249	2.9545	1.46701	4.13925	3.52023	4.87421	12.1424	10.2682
MAGOH	82.6055	114.557	145.786	71.7481	103.342	97.7855	119.61	66.4197	64.2735	67.1598
AL606760.1	2.69366	3.72543	3.87614	0	2.57367	3.17802	2.94708	1.54364	2.92812	5.5052
LRP8	3091.42	5137.36	1655.63	1587.68	286.124	217.609	324.307	205.797	347.389	246.687
AL355483.4	0	0	0	0	0	0	0	0	0	0
AL355483.2	3.59154	8.38221	2.59019	2.07966	0	0.466284	0	1.00972	1.85622	1.34784
AL355483.1	2.69366	8.38221	1.34596	2.62707	0.489003	0	0.593484	0	0	0.673921
AL355483.3	8.08097	36.3229	4.9169	12.2055	0.489003	1.38453	1.1463	1.48551	1.71388	2.09006
LINC01771	18.8556	22.3526	1.14249	5.58157	0.489003	0.918241	0	0.533923	0	0
AC119428.1	0	0	0	0	0	0	0	0	0	0
AC119428.2	0	0	0.448654	0.547412	0	0	0	0	0	0
SLC25A3P1	8.08097	22.3526	4.87518	3.72189	0.489003	0	0	0	0	0.673921
DMRTB1	3.59154	6.5195	0	0.492416	0	0	0	0	0.357303	0
GLIS1	5.38731	24.2153	109.401	62.8271	9.14514	0.903913	4.11371	1.54364	1.35658	2.74122
RNU7.95P	0	0	0	0	0	0	0	0	0	0
NDC1	3506.24	3474.89	1965.59	2059.14	2089.59	1662.01	1378.92	1021.04	959.097	675.596
SNORA58	1.79577	0.931357	2.0398	2.57207	1.46701	0	0	1.06785	0	0
AL049745.1	0	0	0	0	0.489003	0	0	0	0.357303	0
YIPF1	449.841	410.728	397.072	300.668	312.925	384.708	406.028	411.987	341.176	372.45
DIO1	0	1.86271	6.05939	4.10432	4.04068	7.40324	4.09338	4.51467	1.21424	2.78675
HSPB11	79.9118	84.7535	168.917	138.787	120.929	98.2804	132.423	95.3635	89.8511	85.7427
LRRC42	553.098	582.098	721.757	521.486	568.191	560.558	821.272	599.921	403.805	521.746
HNRNPA3P12	1.79577	1.86271	2.8771	1.53224	1.06378	0.932569	5.32102	1.06785	0.85694	0.673921
LDLRAD1	0	0	0	0	0	0	1.1463	0	1.35658	0
TMEM59	875.438	608.176	773.48	606.1	930.993	864.324	1528.72	1046.2	1321.12	1910.82
AL353898.3	4.48943	4.65678	4.67171	9.35845	5.55057	13.3646	2.90641	8.55354	11.4975	10.9421
TCEANC2	377.112	401.415	338.223	421.233	376.22	371.73	363.233	345.821	480.294	418.596
MIR4781	0	0	0	0	0	0	0	0	0	0
AL353898.1	0	0	1.24423	0.547412	0.531889	0.466284	0	0.533923	0.357303	0
AL353898.2	0	0	0	0	0	0	0	0	0	0
AL357673.1	1.79577	0.931357	2.28499	3.50191	0.489003	1.80783	2.33326	0	4.14237	2.0673
CDCP2	0	0	0.448654	2.13465	1.06378	0.466284	0	0	0.714605	0
AL357673.2	0.897886	0	1.83634	1.03983	3.06267	1.83648	2.33326	2.01944	3.78506	0
CYB5RL	591.707	537.393	283.814	463.376	260.756	266.993	197.344	193.655	276.958	193.52
MRPL37	1772.43	1776.1	1090.04	1077.02	929.904	830.729	1048.79	809.536	678.677	752.523
SSBP3	2272.55	2455.99	3254.82	2759.73	3693.29	2504.09	2199.26	2081.75	783.369	1095.35
SSBP3.AS1	28.7323	63.3323	75.8247	98.0687	109.699	150.254	77.0587	118.566	94.8416	62.2147
AL161644.1	1.79577	0.931357	1.93807	0	2.53079	0.466284	2.3536	0	1.42921	1.39338
AL035415.1	0	0	0	0	0	0	0	0	0	0
AC099796.1	0	0	0	0	0.489003	0	0	0	0.357303	0
AC099796.2	0	0	0	0	0	0	0.593484	0	0	0
HNRNPA1P63	0	0	0.34692	0.984833	0	0.451957	1.73978	0	0.499638	0
ACOT11	112.236	118.282	84.5709	89.9675	108.789	71.5798	128.065	101.585	2172.17	1792.9
FAM151A	4.48943	6.5195	5.95766	9.35845	5.50769	6.41336	26.6698	6.41785	81.3455	114.389
AL590093.1	0	0	1.59115	2.62707	0.489003	1.3702	2.33326	0.533923	33.4962	19.1885
MROH7	0	0	6.60978	9.19347	12.122	5.97573	15.597	5.52439	397.58	349.573
MROH7.TTC4	0	0	0	1.64223	0	0	0	0.533923	45.2755	27.3666
TTC4	25.1408	21.4212	10.7728	24.026	20.5036	22.0521	15.7394	19.6023	22.568	28.7828
PARS2	372.623	315.73	230.792	247.916	161.781	186.432	160.914	235.006	221.399	136.66
TTC22	41.3027	21.4212	5.18038	8.26363	1.02089	0	0.593484	1.48551	1.07191	0
AC096536.2	0	0	0	0	0	0	0	0	0	0
LEXM	9.87674	5.58814	2.8771	2.73706	1.55278	0.451957	3.54057	0	3.42776	2.02176
DHCR24	15997.6	20505.7	5954.98	3187.09	2076	4293.01	5590.92	2563.21	1819.38	3791.66
AC096536.3	1.79577	0	0.448654	2.02466	0	0.451957	1.16663	0.951591	0.714605	2.09006
AC096536.1	0	0	0.34692	0.547412	0.531889	0.903913	0.573148	0	1.21424	2.74122
AL590440.2	2.69366	0	0	0	0.978006	0	0	0	0	0
TMEM61	13.4683	7.45085	1.48941	0.492416	0	0.932569	1.71944	3.50495	1.35658	0
AL590440.1	0	0	0	0	0	0	0	0	0	0
BSND	33.2218	27.0093	0.448654	1.58724	1.55278	0	0.593484	1.48551	0	0
PCSK9	8051.34	6725.33	781.791	382.279	150.963	93.589	57.6974	28.5154	2.92812	40.4671
USP24	3114.77	3192.69	4463.93	3273.87	3655.22	3079.33	2730.97	3916.61	3053.93	2669.49
MIR4422HG	0	0	0	0	0	0.466284	0	1.00972	0.499638	0
GYG1P3	0	0	0.448654	0	0	0.466284	0	2.07756	0	0
MIR4422	0	0	0	0	0.489003	0	0	0	0.357303	0
GOT2P1	0	0	0	0	0	0	0	0	0	0
MTCO2P34	0	0	0	0	0	0	0	0	0	0
RN7SKP291	0	0	0	0	0	0	0	0	0	0
RNU6.830P	0	0	0	0	0	0	0	0	0	0
Y_RNA.22	0	0	0	0	0	0	0	0	0	0
AL603840.1	0	1.86271	0.34692	1.64223	0	0.903913	0.573148	0.951591	0.85694	2.69568
LINC01753	0	0	0	0	0	0	0.573148	0	0	0.696688
PIGQP1	0	0	0.448654	0	0.489003	0	0	0	0	0
LINC01755	0	0	0	0	0	0	0	0	0	0
AL353681.1	0	0	0	0	0	0	0	0	0	0
AC119674.1	1.79577	6.5195	2.28499	2.02466	3.01979	4.54822	2.88607	2.01944	2.92812	9.61703
AC119674.2	0	0.931357	1.14249	1.03983	0.531889	2.31709	0.573148	0	0.714605	0.696688
RPSAP20	0	0	0	0	0	0	0	0	1.21424	0
LINC01767	0	0.931357	2.48846	0	11.6759	1.3702	8.16642	0	1.57155	0
PLPP3	653.661	915.524	602.803	437.65	664.566	1251.28	530.329	718.788	538.792	1036.36
RPL21P23	0	0.931357	0	0.492416	1.46701	2.78338	2.29259	2.55336	1.21424	0.696688
RPL23AP85	0	0	0	0	0	0	0	0	0.85694	1.34784
AC099789.1	0	0	0.34692	0.547412	0	0	0	0	0	0
PRKAA2	632.111	570.922	512.714	566.256	1229.44	515.198	1008.11	358.958	2640.63	1902.28
FYB2	0	0	336.186	101.846	440.811	6.9083	52.5188	11.8841	18.2804	11.6388
AL360295.1	0	0	0.34692	0	0	0	0	0	0	0
C8A	0	0	0.693841	0.492416	1.50989	0	2.31293	0	0.357303	0
C8B	0	0	0	0	2.04178	0	0	0	0	0
AL161740.1	0.897886	0	0	0	0.978006	0	0	0	0	0
DAB1	498.327	427.493	1086.28	304.709	1440.43	60.6039	576.97	31.3594	423.381	447.697
AL390243.1	4.48943	2.79407	9.75035	4.59673	6.57147	0.466284	2.88607	0	5.14164	4.78575
RPS20P5	0.897886	0	0	0	0	0	0	0	0.357303	1.39338
DAB1.AS1	1.79577	4.65678	0	0.492416	0.489003	0	0	0	0	0
HNRNPA1P6	0.897886	0	1.59115	1.03983	2.53079	0	0	0	0	0.696688
RPS26P15	0.897886	0	0	0	0	1.3702	0	0.475795	0.499638	0.673921
AL445193.2	0	0	0	0	0	0	0	0.475795	0	0
AL445193.1	0	1.86271	0	0	0	0	0	0	0	0
AL357373.1	0	0	0	0	0	0	0	0	0	0
OMA1	154.436	179.752	116.529	101.083	199.855	86.7666	147.67	93.0793	207.621	165.844
AL035411.2	0	0	0	0	0	0	0	0	0	0
RN7SL713P	0	0	0	0	0	0	0	0	0	0
TACSTD2	17.0598	14.9017	5.38384	21.0165	48.917	40.3166	78.7578	582.138	173.108	0
AL035411.1	1.79577	0	0.34692	1.03983	0	0.451957	1.1463	0.533923	0	1.39338
MYSM1	4198.51	3479.55	1517.18	1458.42	1636.07	1398.19	1856.01	1293.49	2392.65	1529.57
AL136985.3	0	0	0	1.09482	1.9989	0.466284	0.593484	4.45654	1.07191	0
JUN	162.517	208.624	186.59	334.217	384.902	1488.38	534.521	904.122	1262.72	1459.97
LINC01135	0	0	0	0	0	0.451957	0	0	6.71319	0.696688
AL136985.2	0	0	0	0	0.489003	0.466284	0	0	0.85694	1.39338
AL136985.1	0	0	0	0	0.531889	0.451957	0	1.06785	1.35658	0
AC105277.1	0.897886	0	0.34692	0.984833	3.01979	0.451957	1.16663	1.00972	2.78579	3.41514
LINC01358	3.59154	0.931357	0	0	0.978006	1.39885	0	0.533923	0.85694	2.76398
PHBP3	0.897886	0	0.448654	0	0	0.466284	1.18697	0	0	0
AL592431.2	0.897886	3.72543	0	0	0	0	0	0	0	0
AL592431.1	8.08097	6.5195	0.448654	0	0	0	0	0	0	0
HSD52	0	0	0	0	0	0.451957	0	0	0.357303	0
AC093424.1	0	0	0.795574	1.58724	1.55278	6.41336	1.71944	4.99047	4.78434	0
FGGY	125.704	86.6162	160.393	121.822	149.625	178.347	80.0871	105.138	84.6192	130.996
MIR4711	0	0	0	0	0.489003	0.451957	0	0	0	0
AL035416.1	0	0	0	1.53224	0.489003	1.3702	1.18697	0.475795	0.357303	0
HOOK1	1368.38	1306.69	322.505	365.894	708.911	617.884	696.235	669.672	1265.39	595.154
CYP2J2	9.87674	25.1466	7.32191	0.984833	6.48569	1.39885	325.019	7.60195	499.722	377.546
RN7SL475P	0	0	0	0	0.531889	0	0.573148	0	0	0.696688
C1orf87	6.2852	5.58814	1.34596	0.547412	2.57367	0	16.3125	0.533923	0.357303	0.673921
PGBD4P8	0	0	0	0	0	0	4.11371	0	0	0
AC097066.1	0	0	0	0	0	0	0.593484	0	0	0
LINC01748	133.785	30.7348	51.6757	52.0988	54.7678	52.935	39.6045	87.7982	175.124	41.8149
AC099792.1	0	0	0	0	0	1.38453	0	1.54364	2.07118	1.34784
NFIA	33.2218	20.4898	26.9295	16.6922	29.3914	64.7145	38.4175	168.597	538.723	792.521
NFIA.AS2	0	0	0	0	0.489003	0.451957	0	8.32103	1.85622	1.37061
AC096947.1	0.897886	0	0	0	0	0.451957	0	0.475795	3.64273	0
NFIA.AS1	0	0	1.14249	0	0	1.82215	0	0.951591	1.07191	0.673921
AC099791.1	0	0	0	0.492416	0	0	0	0.533923	0	0
TM2D1	89.7886	90.3416	127.537	93.3121	176.597	132.664	262.716	147.43	275.046	261.431
AC099791.2	0	0	0.448654	0	0.489003	0.466284	1.71944	0.951591	0.85694	0
PATJ	1800.26	1799.38	1199.35	1145.95	2000.82	1477.07	1830.88	2388.51	1447.48	780.86
RNU6.414P	0	0	0	0	0	0	0	0.475795	1.85622	0
RNU6.1177P	0	0	0.897307	0	0.489003	0.466284	0.593484	0	1.21424	1.39338
LAMTOR5P1	0	2.79407	0.795574	0	0	1.38453	1.18697	2.37898	1.85622	0
RN7SL180P	0	0	0.34692	1.03983	0	0	0	1.00972	0.357303	0
MIR3116.1	0	0	0	0	0	0	0	0	0.499638	0
MIR3116.2	0	0	0	0	0	0	0	0	0	0
PIGPP2	0	0	0	0	0	0	0	0	0	0
RPS15AP7	0	0	0	0	0	0	0	0	0	0
L1TD1	8062.11	8056.24	859.893	860.52	1288.31	512.286	530.655	555.33	41.7083	3.4379
AL162739.1	25.1408	29.8034	5.01863	7.60623	0.978006	4.15358	0	4.39841	0	0
Y_RNA.23	0	0	0	0	0	0	0	0	0	0
KANK4	22.4471	26.078	12.9927	22.6562	110.514	1650.76	401.833	2101.43	298.024	257.938
RNU6.371P	0	0	0	0	0	0.903913	0.573148	2.13569	0.499638	0.673921
USP1	1413.27	1122.28	1238.2	1134.69	1314.21	1249.73	866.437	801.691	788.578	646.322
DOCK7	1333.36	944.396	1532.22	1569.67	1871.34	2092.88	2144.68	2128.13	1488.27	1821.01
AL451044.1	0	0	0.34692	0	0.531889	0	0.573148	0	0.714605	0
ANGPTL3	8.08097	6.5195	2.14153	4.04932	2.4879	7.37458	8.12575	8.194	4.35733	2.71845
AL138847.2	0.897886	3.72543	1.24423	3.00949	2.57367	3.64431	1.16663	5.64064	4.78434	0
AL138847.1	0	0	0.34692	1.47725	0.489003	3.20668	1.76012	2.01944	1.07191	0.673921
AC103923.1	9.87674	15.8331	9.09823	18.4995	10.655	19.7637	9.31272	15.5053	25.932	30.1079
ATG4C	281.936	189.065	234.751	163.685	264.806	143.698	207.396	108.923	201.271	141.195
AC099794.1	0	0	0	0.492416	1.02089	0	0.573148	0	0.499638	0
AC099794.2	0	0	0	0	0	0	0	0	0.357303	0.696688
LINC01739	0	0	0	0.547412	0.489003	0	0	0	0.357303	0
AL162400.1	0	0	0	0	0	0	0	0	0.357303	0
AL162400.2	0	0	0	0	0	0	0	0	0	0
AC096543.1	1.79577	0	0	0.492416	0.489003	0	0	0	0	0
LINC00466	0.897886	1.86271	0.34692	0	3.14845	0.932569	0	0.475795	1.07191	0.673921
RNA5SP49	0	0	0	0	0	0	0	0	0.357303	0
AC096543.2	0	0	0	0	0	0	0	0	0	0
RPSAP65	0	0.931357	0	0	0	0	0	0	0	0
FOXD3.AS1	483.96	191.859	29.6397	33.272	12.2078	0.451957	1.16663	0.475795	0	0
FOXD3	295.404	131.321	26.2122	123.41	12.611	0	0	2.61149	0.357303	0
MIR6068	0	0	0	0	0	0	0	0	0.357303	0
Y_RNA.24	0	0	0	0	0	0	0	0	0	0
AL049636.1	0	1.86271	0.34692	0.492416	0.489003	2.30277	1.73978	0	3.14309	0.696688
ALG6	313.362	372.543	184.523	192.141	179.806	166.267	162.284	128.826	121.555	78.1474
ITGB3BP	253.204	242.153	323.504	265.651	351.418	266.19	202.77	175.887	186.061	97.9416
EFCAB7	33.2218	40.9797	92.5369	71.2532	86.0122	81.6088	97.6273	52.2621	131.135	111.625
RN7SL488P	0	0	0	0	0	0	0	0	0	0
RNU7.123P	0	0	0.448654	0	0.531889	0	1.16663	0.533923	2.57082	0.696688
DLEU2L	8.97886	9.31357	13.1178	21.179	25.9255	25.6105	19.2189	19.1265	46.0657	20.4225
DLEU2_6	0	0	0	0	0	0	0	0	0	0
DLEU2_5	0	0	0	0	0	0	0	0	0	0
DLEU2_4	0	0	0	0	0	0	0	0	0	0
DLEU2_3	0	0	0	0	0	0	0	0	0	0
DLEU2_2	0	0	0	0	0	0	0	0	0	0
DLEU2_1	0	0	0	0	0	0	0	0	0	0
PGM1	2383.89	1635.46	1928.17	1232.25	1654.3	616.183	2609.32	841.608	3376.1	2337.3
RN7SL130P	2.69366	3.72543	1.93807	1.03983	0.489003	2.31709	2.31293	4.45654	13.7807	14.4483
ROR1	3495.47	2566.82	3462.06	3237.12	2990.39	1223.01	1615.81	1045.39	1521.71	3247.56
AL161742.1	0.897886	0	1.59115	2.07966	3.55168	2.72607	2.31293	0	1.92885	2.09006
CFL1P3	0.897886	1.86271	1.48941	1.47725	2.65944	0.918241	1.76012	2.07756	1.49891	0.673921
RNU6.809P	0	0	0.448654	1.03983	0	0.451957	0	0	0	0
Y_RNA.25	0	1.86271	1.14249	0	0	0	0	0.533923	0.357303	0.673921
ROR1.AS1	4.48943	13.039	21.5222	18.0595	27.3925	11.9515	15.841	12.4762	21.5688	41.1866
UBE2U	1.79577	0	0	0.984833	1.55278	0	0	0	0.357303	1.37061
RNU7.62P	0	0	0	0	0	0	0	0	0	0
CACHD1	3557.42	2248.3	5243.67	3975.97	922.131	2678.18	988.222	1197.25	3735.88	4808.54
MIR4794	0	0	0	0	0	0	0	0	0	0
RAVER2	1026.28	1043.12	895.487	950.105	766.183	875.478	681.622	753.061	1665.29	1169.06
JAK1	967.921	816.8	563.336	552.133	613.179	884.166	1356.09	2330.11	2220.49	2792.43
AL606517.2	0	0	0	0	0	0	0	0	0	0
AL606517.1	0.897886	0	0	0	0	0.451957	0	0	0.499638	0
LINC01359	2.69366	0.931357	3.52922	8.59106	7.67813	16.0621	5.85349	9.33075	6.57085	9.57149
SLC2A3P2	0	1.86271	1.93807	1.58724	1.50989	5.07182	1.1463	6.17457	3.9274	1.39338
AL357078.3	0	1.86271	1.14249	0	0.531889	1.3702	0	0	4.78434	0
RNU6.1176P	0	0.931357	0.34692	0	0	1.39885	0	0.533923	1.92885	0
MIR3671	8.97886	12.1076	4.32479	8.20863	3.63745	10.0577	4.07304	5.58252	7.64276	1.39338
MIR101.1	0	2.79407	0	0	0	0	0	0	0	0
AL357078.1	0	0	1.24423	0.547412	0	1.39885	0	1.06785	0.357303	0
AL357078.2	0	0	0	0	0	0	0	0	1.07191	0
MRPS21P1	0	0	0	0	0	0.451957	0	0	0.499638	0
AK4	4353.85	2998.97	1501.76	506.881	1712.48	226.949	2997.19	625.666	4557.38	1731.34
RPS29P7	0	0.931357	0.448654	0	0	0.466284	1.76012	0	0.499638	0.673921
DNAJC6	188.556	149.017	651.891	270.515	2720.17	366.744	3462.8	679.594	2835.46	2210.5
AL139294.1	0	0.931357	0	0	2.57367	0.451957	2.33326	0	3.28543	2.09006
COX6CP13	0	0	0.795574	0.492416	1.06378	0	1.18697	0.475795	2.57082	0
RNU2.15P	0	0	0	0	0.489003	0.466284	0	0	0	0
LEPROT	650.069	688.273	826.669	748.236	1392.41	1353.13	2214.72	2184.98	2027.24	2723.51
LEPR	554.893	269.162	615.946	423.637	1370.39	355.805	807.533	635.563	1304.17	272.068
AC119800.1	0	0	1.93807	0	0.978006	0	0.593484	0.475795	1.07191	0
AC097063.1	0.897886	0.931357	0	1.47725	1.50989	0.466284	0	1.48551	1.21424	0
RN7SL854P	0	0	0	0	0.531889	0	0	0	0.357303	0
PDE4B	494.735	839.152	99.9086	29.99	92.4121	22.8701	53.6447	51.1942	263.673	431.969
AL590783.1	0	0	0	0	0	0	0	0	0.499638	0
RNU4.88P	0	0	0	0	0	0	0	0	0	0
SGIP1	58.3626	23.2839	58.9874	52.3687	256.75	31.8154	152.256	48.0381	282.256	137.78
MIR3117	0.897886	0	0.448654	0	1.55278	0.451957	1.78045	0.533923	2.57082	0
AL139147.1	1.79577	0.931357	2.48846	2.46208	5.63635	0.918241	3.49989	0.951591	13.3567	3.41514
TCTEX1D1	19.7535	17.6958	31.3509	14.4476	12.9112	14.2686	63.9817	7.30054	20.1425	2.0673
INSL5	0	0	0	0.547412	0	0	1.71944	0	0	0.673921
WDR78	12.5704	9.31357	19.811	28.7302	24.2441	48.2291	27.4057	34.1453	41.4904	51.5686
AL592161.1	0	0	0	0	0.978006	0	0	0.951591	0	0
MIER1	765.896	703.174	746.14	731.089	957.931	800.055	781.545	589.392	798.492	505.777
SLC35D1	226.267	157.399	263.249	277.849	430.439	1017.83	551.406	953.424	675.493	819.396
C1orf141	0	0	0	0	1.55278	0.932569	0.573148	0	0	0.696688
SNORA31	0	0	0	0	0	0	0	0	0	0
AL133320.1	0	0	0	0	0	0	0	0	0	0
IL23R	0	0.931357	0.693841	1.58724	1.55278	2.31709	1.71944	0.533923	0	0
RNU6.586P	0	0	0	0	0.489003	0	0	0	0	0
RNU4ATAC4P	0	0	0	0	0	0	0	0	0	0
AL389925.1	0	0	0	0	0	0	0	0	0	0
IL12RB2	40.4049	26.078	27.1513	55.0533	15.6737	15.5814	5.85349	30.5822	9.35371	15.7734
SERBP1	11030.5	11248	7549.72	6988.61	7653.39	6010.49	6606.85	3879.38	7744.99	5264.22
RNU6.387P	3.59154	10.2449	7.16017	10.4533	9.14514	5.94708	1.76012	6.35972	8.42707	4.11183
LINC01702	0	0	0	0	0	0	0	0	0	0
RNU6.1031P	0	0	0	0	0	0	0	0	0	0
AL590559.1	0	0	0	0	0	0	0	0	0	0
RN7SL392P	0	0	0	0	0	0	0	0	0	0.673921
HNRNPCP9	0	0	0	0	0	0	0	0	0	0
GADD45A	101.461	80.0967	388.281	386.164	631.306	359.147	677.301	359.677	370.881	548.721
GNG12	1989.71	1234.98	572.685	731.636	841.601	1426.71	1967.68	1809.45	3232.49	7935.11
RNU7.80P	0	1.86271	1.04076	0	0	0	0	0	0	2.04453
GNG12.AS1	2.69366	4.65678	95.1688	157.066	61.4596	39.556	60.234	50.8347	98.6963	115.714
AL157407.1	0	0	0	0	0	0	0	0	0.357303	0.696688
DIRAS3	4.48943	0.931357	22.9099	18.9343	9.63414	29.441	34.8363	20.0889	148.056	144.187
ARL5AP3	0	0	5.2221	1.58724	1.9989	4.59121	4.03237	0.475795	25.3568	34.3107
WLS	84.4012	60.5382	5300.74	6797.12	3313.32	1445.86	3089.61	1602.11	2066.38	5062.61
CTBP2P8	1.79577	0.931357	39.4735	73.4454	20.7353	19.6491	23.4343	26.6704	26.9951	45.904
MIR1262	0	0	1.34596	2.51708	0.489003	0.451957	1.16663	0	0	0
RPS7P4	0	0	0	0.492416	0	0	0	0.475795	0	0
[truncated: 56,406 more rows]
