# Supplementary material for: GATA6 mutations in hiPSCs inform mechanisms for maldevelopment of the heart, pancreas, and diaphragm
Source: eLife. 2020 Oct 15;9:e53278. doi: 10.7554/eLife.53278 (PMC7593088; doi:10.7554/eLife.53278)
Supplement: Supplementary file 3. [file elife-53278-supp3.xlsx]

## Sheet: Sheet1
Supplemental Table 3: RNA-Seq-based principal component analysis (PCA) for GATA6 LoF and R456G missense hiPSC-CMs during differentiation shows an enrichment for cardiac genes
Principal Component 1		Principal Component 2		Principal Component 3		Principal Component 4
MT.CO1	TPM1	FN1	EMC10	TTN	RPL4	COL3A1	LAMA1
FN1	HSP90AB1	MT.CO1	ATP2A2	ACTC1	NEBL	MYH6	ANKRD1
MT.ND4	FSTL1	COL3A1	MT.CYB	MYH6	PRKDC	MYH7	ACTA2
MT.RNR2	VCAN	TTN	FBN1	MYH7	PRTG	ACTC1	MT.CO2
EEF1A1	MT.ND2	MYH6	ACTG1	ACTB	RACK1	MT.CO1	FASN
MT.CO2	MT.RNR1	MT.RNR2	TNC	EEF1A1	TRIM28	KRT8	COL1A2
COL3A1	MALAT1	MYH7	NEBL	COL3A1	PODXL	EEF1A1	NES
ACTB	PKM	MT.ND4	IGFBP5	FN1	KRT8	FBN2	COL1A1
TTN	SPARC	COL1A1	MT.CO3	EEF2	RPLP0	COL2A1	LAMC1
MT.ATP6	APLP2	COL1A2	CALD1	ACTG1	GJA1	ACTB	APLP2
MT.ND5	PABPC1	ACTC1	COL12A1	FLNA	TNNI1	EEF2	MT.ND1
MT.CYB	FLNC	CTGF	MT.ND1	LIN28A	MT.CO1	PRTG	HSP90B1
MYH6	ITGAV	EEF1A1	VCAN	MYL7	TNNT2	MYL7	MT.CYB
EEF2	MT.ND6	SPARC	MYBPC3	HSP90AB1	PKM	SLC2A3	FBN1
ACTC1	RPL3	MYL7	COL5A2	PABPC1	SRRM2	FLNC	DOK4
MT.ND1	HSPG2	COL4A1	PAM	FASN	LDB3	TPM1	HSPG2
FLNA	MT.ND4L	FSTL1	MYH9	HMGA1	SLC8A1	RHOBTB3	LIFR
ACTG1	MYH9	MT.CO2	COL4A2	EMC10	IGF2	AHNAK	MYL4
GAPDH	COL4A1	GAPDH	TNNI1	RPL3	SCD	FN1	NEBL
MT.CO3	ENO1	MT.ND5	PAPPA	RPS2	HNRNPA1	RELN	ACTG1
COL1A2	CTGF	ITGAV	TNNT2	ATP2A2	TPM1	MT.RNR2	NID2
FBN2	RPL4	EEF2	COL8A1	MT.RNR2	TKT	DNMT3B	SPARC
MYH7	MYL7	ACTB	PKM	PAM	COL1A2	KRT18	AGRN
COL1A1	ATP2A2	MT.ATP6	COL5A1	DNMT3B	PTPRF	FLNA	MYL9
KRT8	MACF1	FLNA	ITGA1	MYBPC3	HSPB7	VCAN
						ITGAV
