# Supplementary material for: GATA6 mutations in hiPSCs inform mechanisms for maldevelopment of the heart, pancreas, and diaphragm
Source: eLife. 2020 Oct 15;9:e53278. doi: 10.7554/eLife.53278 (PMC7593088; doi:10.7554/eLife.53278)
Supplement: Supplementary file 4. [file elife-53278-supp4.xlsx]

## Sheet: GATA6_WT_ChIP_D4
Supplemental Table 4: GATA6 ChIP-seq peaks in WT hIPSCs (Day 4)
ID	seqnames	start	end	width	strand	V5	V6	annotation	geneChr	geneStart	geneEnd	geneLength	geneStrand	geneId	transcriptId	distanceToTSS	ENSEMBL	SYMBOL	GENENAME	GATA_Motif	DE_D4_het	DE_D4_homo	DE_D4_mis	D4_ATACoverlap	D8_ATACoverlap
20200205_TTNGFP_D4_GATA6ChIP_001_peak_1	chr1	139280	139517	238	*	16.3	+	Promoter (1-2kb)	1	134773	140566	5794	2	729737	uc021oeg.2	1049	NA	LOC729737	uncharacterized LOC729737	FALSE	FALSE	FALSE	FALSE	FALSE	FALSE
20200205_TTNGFP_D4_GATA6ChIP_001_peak_10	chr1	870589	871146	558	*	77.8	+	Promoter (3-4kb)	1	874655	879533	4879	1	148398	uc031pko.1	-3509	ENSG00000187634	SAMD11	sterile alpha motif domain containing 11	TRUE	FALSE	TRUE	TRUE	FALSE	FALSE
20200205_TTNGFP_D4_GATA6ChIP_001_peak_100	chr1	1389846	1389994	149	*	13.9	+	Exon (uc001aft.2/219293, exon 4 of 12)	1	1385069	1405538	20470	1	219293	uc001aft.2	4777	ENSG00000215915	ATAD3C	ATPase family AAA domain containing 3C	FALSE	FALSE	FALSE	FALSE	FALSE	FALSE
20200205_TTNGFP_D4_GATA6ChIP_001_peak_1000	chr1	16511186	16511503	318	*	26.2	+	Distal Intergenic	1	16524599	16533705	9107	2	128272	uc009voo.2	22202	ENSG00000142632	ARHGEF19	Rho guanine nucleotide exchange factor 19	FALSE	FALSE	FALSE	TRUE	FALSE	FALSE
20200205_TTNGFP_D4_GATA6ChIP_001_peak_10000	chr15	79471459	79471576	118	*	24.1	+	Distal Intergenic	15	79502130	79502213	84	1	406960	uc010uni.2	-30554	ENSG00000207695	MIR184	microRNA 184	TRUE	FALSE	FALSE	FALSE	TRUE	TRUE
20200205_TTNGFP_D4_GATA6ChIP_001_peak_10001	chr15	79502135	79502432	298	*	19.2	+	Promoter (<=1kb)	15	79502130	79502213	84	1	406960	uc010uni.2	5	ENSG00000207695	MIR184	microRNA 184	TRUE	FALSE	FALSE	FALSE	TRUE	TRUE
20200205_TTNGFP_D4_GATA6ChIP_001_peak_10002	chr15	79616455	79616604	150	*	6.7	+	Intron (uc010unj.1/23423, intron 2 of 2)	15	79603491	79704334	100844	1	23423	uc010unj.1	12964	ENSG00000166557	TMED3	transmembrane p24 trafficking protein 3	FALSE	FALSE	FALSE	FALSE	FALSE	FALSE
20200205_TTNGFP_D4_GATA6ChIP_001_peak_10003	chr15	80107977	80108099	123	*	10.6	+	Distal Intergenic	15	80135889	80189339	53451	2	10588	uc021srp.1	81240	ENSG00000136371	MTHFS	methenyltetrahydrofolate synthetase	FALSE	FALSE	FALSE	FALSE	FALSE	FALSE
20200205_TTNGFP_D4_GATA6ChIP_001_peak_10004	chr15	80210658	80210883	226	*	14.5	+	Promoter (3-4kb)	15	80191182	80207598	16417	2	400410	uc002bez.4	-3060	ENSG00000180953	ST20	suppressor of tumorigenicity 20	FALSE	FALSE	FALSE	FALSE	FALSE	FALSE
20200205_TTNGFP_D4_GATA6ChIP_001_peak_10005	chr15	80218786	80218958	173	*	15	+	Promoter (2-3kb)	15	80191182	80216096	24915	2	400410	uc021sru.1	-2690	ENSG00000180953	ST20	suppressor of tumorigenicity 20	FALSE	FALSE	FALSE	FALSE	FALSE	FALSE
20200205_TTNGFP_D4_GATA6ChIP_001_peak_10006	chr15	80465386	80465675	290	*	17.3	+	Promoter (4-5kb)	15	80469879	80473501	3623	1	2184	uc010bln.1	-4204	ENSG00000103876	FAH	fumarylacetoacetate hydrolase	FALSE	FALSE	FALSE	FALSE	FALSE	FALSE
20200205_TTNGFP_D4_GATA6ChIP_001_peak_10007	chr15	80587655	80587786	132	*	17.1	+	Intron (uc002bfo.3/283688, intron 1 of 2)	15	80555410	80634147	78738	2	283688	uc002bfo.3	46361	ENSG00000259361	LINC00927	long intergenic non-protein coding RNA 927	FALSE	FALSE	FALSE	FALSE	FALSE	FALSE
20200205_TTNGFP_D4_GATA6ChIP_001_peak_10008	chr15	80588569	80588734	166	*	12.4	+	Intron (uc002bfo.3/283688, intron 1 of 2)	15	80555410	80634147	78738	2	283688	uc002bfo.3	45413	ENSG00000259361	LINC00927	long intergenic non-protein coding RNA 927	FALSE	FALSE	FALSE	FALSE	FALSE	FALSE
20200205_TTNGFP_D4_GATA6ChIP_001_peak_10009	chr15	80620119	80620256	138	*	8.9	+	Intron (uc002bfo.3/283688, intron 1 of 2)	15	80555410	80634147	78738	2	283688	uc002bfo.3	13891	ENSG00000259361	LINC00927	long intergenic non-protein coding RNA 927	FALSE	FALSE	FALSE	FALSE	FALSE	FALSE
20200205_TTNGFP_D4_GATA6ChIP_001_peak_1001	chr1	16511696	16511862	167	*	16.8	+	Distal Intergenic	1	16524599	16533705	9107	2	128272	uc009voo.2	21843	ENSG00000142632	ARHGEF19	Rho guanine nucleotide exchange factor 19	TRUE	FALSE	FALSE	TRUE	FALSE	FALSE
20200205_TTNGFP_D4_GATA6ChIP_001_peak_10010	chr15	80853091	80853526	436	*	31.3	+	Intron (uc002bfr.3/9915, intron 11 of 18)	15	80735305	80890277	154973	1	9915	uc002bfs.3	117786	ENSG00000172379	ARNT2	aryl hydrocarbon receptor nuclear translocator 2	TRUE	FALSE	TRUE	TRUE	TRUE	TRUE
20200205_TTNGFP_D4_GATA6ChIP_001_peak_10011	chr15	80872890	80873051	162	*	13.5	+	Exon (uc002bfr.3/9915, exon 16 of 19)	15	80987652	81047962	60311	1	58489	uc002bft.3	-114601	ENSG00000136379	ABHD17C	abhydrolase domain containing 17C	FALSE	FALSE	FALSE	FALSE	FALSE	FALSE
20200205_TTNGFP_D4_GATA6ChIP_001_peak_10013	chr15	80939554	80939792	239	*	12.1	+	Distal Intergenic	15	80987652	81047962	60311	1	58489	uc002bft.3	-47860	ENSG00000136379	ABHD17C	abhydrolase domain containing 17C	FALSE	FALSE	FALSE	FALSE	FALSE	FALSE
20200205_TTNGFP_D4_GATA6ChIP_001_peak_10014	chr15	81217910	81218033	124	*	12.3	+	Exon (uc002bfw.1/57214, exon 18 of 29)	15	81239668	81282205	42538	2	23184	uc002bfx.3	64172	ENSG00000117899	MESD	mesoderm development LRP chaperone	FALSE	FALSE	FALSE	FALSE	FALSE	FALSE
20200205_TTNGFP_D4_GATA6ChIP_001_peak_10015	chr15	81241329	81241488	160	*	15.3	+	3' UTR	15	81239668	81282205	42538	2	23184	uc002bfx.3	40717	ENSG00000117899	MESD	mesoderm development LRP chaperone	FALSE	FALSE	FALSE	FALSE	FALSE	FALSE
20200205_TTNGFP_D4_GATA6ChIP_001_peak_10017	chr15	81489361	81489568	208	*	17	+	Promoter (<=1kb)	15	81489219	81605104	115886	1	3603	uc002bgg.3	142	ENSG00000172349	IL16	interleukin 16	FALSE	FALSE	FALSE	FALSE	FALSE	FALSE
20200205_TTNGFP_D4_GATA6ChIP_001_peak_10018	chr15	81627123	81627309	187	*	15	+	3' UTR	15	81605007	81616524	11518	2	80765	uc002bgn.3	-10599	ENSG00000172345	STARD5	StAR related lipid transfer domain containing 5	FALSE	FALSE	FALSE	FALSE	FALSE	FALSE
20200205_TTNGFP_D4_GATA6ChIP_001_peak_10019	chr15	81943499	81944116	618	*	45.9	+	Distal Intergenic	15	81629983	81666418	36436	2	342125	uc002bgp.3	-277081	ENSG00000188869	TMC3	transmembrane channel like 3	FALSE	FALSE	FALSE	FALSE	FALSE	FALSE
20200205_TTNGFP_D4_GATA6ChIP_001_peak_1002	chr1	16534617	16534843	227	*	15.7	+	Promoter (<=1kb)	1	16524599	16533705	9107	2	128272	uc009voo.2	-912	ENSG00000142632	ARHGEF19	Rho guanine nucleotide exchange factor 19	FALSE	FALSE	FALSE	TRUE	FALSE	FALSE
20200205_TTNGFP_D4_GATA6ChIP_001_peak_10020	chr15	82287721	82287840	120	*	8.5	+	Distal Intergenic	15	82334119	82338484	4366	2	84206	uc002bgq.2	50644	ENSG00000183496	MEX3B	mex-3 RNA binding family member B	FALSE	FALSE	FALSE	TRUE	TRUE	FALSE
20200205_TTNGFP_D4_GATA6ChIP_001_peak_10021	chr15	82335590	82335773	184	*	17.3	+	Promoter (2-3kb)	15	82334119	82338484	4366	2	84206	uc002bgq.2	2711	ENSG00000183496	MEX3B	mex-3 RNA binding family member B	FALSE	FALSE	FALSE	TRUE	FALSE	FALSE
20200205_TTNGFP_D4_GATA6ChIP_001_peak_10022	chr15	82338939	82339114	176	*	16.3	+	Promoter (<=1kb)	15	82334119	82338484	4366	2	84206	uc002bgq.2	-455	ENSG00000183496	MEX3B	mex-3 RNA binding family member B	FALSE	FALSE	FALSE	TRUE	FALSE	FALSE
20200205_TTNGFP_D4_GATA6ChIP_001_peak_10023	chr15	83378464	83378585	122	*	7.4	+	Promoter (<=1kb)	15	83328033	83378635	50603	2	8120	uc010uoh.2	50	ENSG00000103723	AP3B2	adaptor related protein complex 3 subunit beta 2	FALSE	FALSE	FALSE	FALSE	TRUE	TRUE
20200205_TTNGFP_D4_GATA6ChIP_001_peak_10024	chr15	83440654	83440848	195	*	16.7	+	Exon (uc002bjd.2/123722, exon 7 of 13)	15	83424697	83424823	127	1	677778	uc002bjc.3	15957	ENSG00000277864	SCARNA15	small Cajal body-specific RNA 15	FALSE	FALSE	FALSE	FALSE	FALSE	FALSE
20200205_TTNGFP_D4_GATA6ChIP_001_peak_10026	chr15	83523560	83523849	290	*	16.5	+	Intron (uc002bjg.3/9455, intron 5 of 8)	15	83477973	83503613	25641	1	123720	uc002bje.3	45587	ENSG00000156232	WHAMM	WASP homolog associated with actin, golgi membranes and microtubules	FALSE	FALSE	FALSE	FALSE	FALSE	FALSE
20200205_TTNGFP_D4_GATA6ChIP_001_peak_1003	chr1	16542557	16542821	265	*	21.5	+	Promoter (3-4kb)	1	16524599	16539104	14506	2	128272	uc001ayc.1	-3453	ENSG00000142632	ARHGEF19	Rho guanine nucleotide exchange factor 19	TRUE	FALSE	FALSE	TRUE	TRUE	TRUE
20200205_TTNGFP_D4_GATA6ChIP_001_peak_10030	chr15	83890424	83890834	411	*	23.6	+	Distal Intergenic	15	83806804	83876770	69967	2	50810	uc002bjs.2	-13654	ENSG00000166503	HDGFL3	HDGF like 3	FALSE	FALSE	FALSE	FALSE	FALSE	FALSE
20200205_TTNGFP_D4_GATA6ChIP_001_peak_10033	chr15	84198100	84198249	150	*	10.1	+	Intron (uc010bms.2/6457, intron 1 of 2)	15	84116091	84287493	171403	1	6457	uc002bjx.3	82009	ENSG00000140600	SH3GL3	SH3 domain containing GRB2 like 3, endophilin A3	FALSE	FALSE	FALSE	FALSE	FALSE	FALSE
20200205_TTNGFP_D4_GATA6ChIP_001_peak_10034	chr15	84824832	84825100	269	*	19.7	+	Distal Intergenic	15	84841242	84850985	9744	1	100505679	uc021stj.1	-16142	ENSG00000259511	UBE2Q2L	ubiquitin conjugating enzyme E2 Q2 like	FALSE	FALSE	FALSE	FALSE	FALSE	TRUE
20200205_TTNGFP_D4_GATA6ChIP_001_peak_10035	chr15	84827834	84828135	302	*	22.3	+	Distal Intergenic	15	84841242	84850985	9744	1	100505679	uc021stj.1	-13107	ENSG00000259511	UBE2Q2L	ubiquitin conjugating enzyme E2 Q2 like	FALSE	FALSE	FALSE	FALSE	FALSE	FALSE
20200205_TTNGFP_D4_GATA6ChIP_001_peak_10036	chr15	84828738	84828895	158	*	16.3	+	Distal Intergenic	15	84841242	84850985	9744	1	100505679	uc021stj.1	-12347	ENSG00000259511	UBE2Q2L	ubiquitin conjugating enzyme E2 Q2 like	FALSE	FALSE	FALSE	FALSE	FALSE	FALSE
20200205_TTNGFP_D4_GATA6ChIP_001_peak_10037	chr15	84833218	84833449	232	*	24.2	+	Promoter (7-8kb)	15	84841242	84850985	9744	1	100505679	uc021stj.1	-7793	ENSG00000259511	UBE2Q2L	ubiquitin conjugating enzyme E2 Q2 like	FALSE	FALSE	FALSE	FALSE	TRUE	TRUE
20200205_TTNGFP_D4_GATA6ChIP_001_peak_10038	chr15	84858750	84858893	144	*	15.9	+	Promoter (1-2kb)	15	84860600	84878025	17426	1	440300	uc021stk.1	-1707	NA	LOC440300	chondroitin sulfate proteoglycan 4 pseudogene	FALSE	FALSE	FALSE	FALSE	FALSE	FALSE
20200205_TTNGFP_D4_GATA6ChIP_001_peak_1004	chr1	16556787	16557011	225	*	25.1	+	Downstream (1-2kb)	1	16558182	16563659	5478	2	79363	uc001ayd.3	6648	ENSG00000132881	CPLANE2	ciliogenesis and planar polarity effector 2	FALSE	FALSE	FALSE	FALSE	FALSE	FALSE
20200205_TTNGFP_D4_GATA6ChIP_001_peak_10040	chr15	84865694	84865924	231	*	18.3	+	Intron (uc021stk.1/440300, intron 3 of 7)	15	84868830	84869441	612	2	642423	uc031qte.1	3517	NA	NA	NA	FALSE	FALSE	FALSE	FALSE	FALSE	FALSE
20200205_TTNGFP_D4_GATA6ChIP_001_peak_10042	chr15	85259394	85259686	293	*	17.3	+	Promoter (<=1kb)	15	85212768	85259691	46924	2	23478	uc002blb.2	5	ENSG00000140612	SEC11A	SEC11 homolog A, signal peptidase complex subunit	FALSE	FALSE	FALSE	TRUE	TRUE	TRUE
20200205_TTNGFP_D4_GATA6ChIP_001_peak_10043	chr15	85274744	85274926	183	*	7.7	+	Distal Intergenic	15	85212768	85259691	46924	2	23478	uc031qtj.1	-15053	ENSG00000140612	SEC11A	SEC11 homolog A, signal peptidase complex subunit	FALSE	FALSE	FALSE	TRUE	FALSE	FALSE
20200205_TTNGFP_D4_GATA6ChIP_001_peak_10045	chr15	85360821	85361480	660	*	149.6	+	Promoter (<=1kb)	15	85359911	85416713	56803	1	57538	uc002ble.3	910	ENSG00000136383	ALPK3	alpha kinase 3	TRUE	FALSE	TRUE	TRUE	TRUE	TRUE
20200205_TTNGFP_D4_GATA6ChIP_001_peak_10046	chr15	85438060	85438324	265	*	13.2	+	Exon (uc002blf.3/9154, exon 6 of 7)	15	85427913	85518876	90964	1	9154	uc010upg.1	10147	ENSG00000156222	SLC28A1	solute carrier family 28 member 1	FALSE	FALSE	FALSE	FALSE	FALSE	FALSE
20200205_TTNGFP_D4_GATA6ChIP_001_peak_10047	chr15	85448334	85448517	184	*	8.8	+	Intron (uc010upd.1/9154, intron 6 of 11)	15	85427913	85518876	90964	1	9154	uc010upg.1	20421	ENSG00000156222	SLC28A1	solute carrier family 28 member 1	FALSE	FALSE	FALSE	FALSE	FALSE	FALSE
20200205_TTNGFP_D4_GATA6ChIP_001_peak_10048	chr15	85487780	85488006	227	*	22.9	+	Exon (uc002blg.3/9154, exon 17 of 19)	15	85523744	85682376	158633	1	5151	uc021stv.1	-35738	ENSG00000073417	PDE8A	phosphodiesterase 8A	FALSE	FALSE	FALSE	FALSE	FALSE	FALSE
20200205_TTNGFP_D4_GATA6ChIP_001_peak_1005	chr1	16559954	16560174	221	*	9.8	+	Exon (uc001ayd.3/79363, exon 2 of 5)	1	16558182	16563659	5478	2	79363	uc001ayd.3	3485	ENSG00000132881	CPLANE2	ciliogenesis and planar polarity effector 2	FALSE	FALSE	FALSE	FALSE	FALSE	FALSE
20200205_TTNGFP_D4_GATA6ChIP_001_peak_10051	chr15	85808058	85808218	161	*	16.7	+	Distal Intergenic	15	85747907	85748518	612	2	642423	uc031qtk.1	-59540	NA	NA	NA	FALSE	FALSE	FALSE	FALSE	FALSE	FALSE
20200205_TTNGFP_D4_GATA6ChIP_001_peak_10052	chr15	85849805	85849975	171	*	9.5	+	Distal Intergenic	15	85923847	86080227	156381	1	11214	uc002bls.4	-73872	ENSG00000170776	AKAP13	A-kinase anchoring protein 13	FALSE	FALSE	FALSE	FALSE	FALSE	FALSE
20200205_TTNGFP_D4_GATA6ChIP_001_peak_10054	chr15	86303216	86303496	281	*	14.1	+	3' UTR	15	86313727	86313809	83	2	100302121	uc021stx.1	10313	ENSG00000221634	MIR1276	microRNA 1276	TRUE	FALSE	FALSE	FALSE	FALSE	FALSE
20200205_TTNGFP_D4_GATA6ChIP_001_peak_10055	chr15	86309679	86309823	145	*	19.8	+	Intron (uc002bly.3/64410, intron 2 of 2)	15	86313727	86313809	83	2	100302121	uc021stx.1	3986	ENSG00000221634	MIR1276	microRNA 1276	FALSE	FALSE	FALSE	FALSE	TRUE	TRUE
20200205_TTNGFP_D4_GATA6ChIP_001_peak_10057	chr15	86790840	86791039	200	*	15.7	+	Exon (uc002blz.1/123624, exon 6 of 24)	15	86805856	86839446	33591	1	123624	uc002bma.1	-14817	ENSG00000273540	AGBL1	ATP/GTP binding protein like 1	FALSE	FALSE	FALSE	FALSE	FALSE	FALSE
20200205_TTNGFP_D4_GATA6ChIP_001_peak_10058	chr15	87115142	87115424	283	*	31.9	+	Intron (uc002blz.1/123624, intron 21 of 23)	15	86840065	86860199	20135	2	727915	uc031qtm.1	-254943	ENSG00000260125	AGBL1-AS1	AGBL1 antisense RNA 1	FALSE	FALSE	FALSE	FALSE	FALSE	TRUE
20200205_TTNGFP_D4_GATA6ChIP_001_peak_10059	chr15	87115649	87115862	214	*	28	+	Intron (uc002blz.1/123624, intron 21 of 23)	15	86840065	86860199	20135	2	727915	uc031qtm.1	-255450	ENSG00000260125	AGBL1-AS1	AGBL1 antisense RNA 1	FALSE	FALSE	FALSE	FALSE	FALSE	TRUE
20200205_TTNGFP_D4_GATA6ChIP_001_peak_10060	chr15	88726774	88726950	177	*	18	+	Intron (uc002bmh.2/4916, intron 2 of 15)	15	88459504	88749164	289661	2	4916	uc010upl.1	22214	ENSG00000140538	NTRK3	neurotrophic receptor tyrosine kinase 3	TRUE	FALSE	FALSE	FALSE	FALSE	FALSE
20200205_TTNGFP_D4_GATA6ChIP_001_peak_10062	chr15	88758152	88758399	248	*	22.6	+	Promoter (8-9kb)	15	88459504	88749164	289661	2	4916	uc010upl.1	-8988	ENSG00000140538	NTRK3	neurotrophic receptor tyrosine kinase 3	FALSE	FALSE	FALSE	FALSE	FALSE	FALSE
20200205_TTNGFP_D4_GATA6ChIP_001_peak_10064	chr15	88971328	88971571	244	*	25.9	+	Distal Intergenic	15	89002708	89009004	6297	2	26589	uc002bmi.1	37433	ENSG00000259494	MRPL46	mitochondrial ribosomal protein L46	TRUE	FALSE	FALSE	FALSE	TRUE	TRUE
20200205_TTNGFP_D4_GATA6ChIP_001_peak_10066	chr15	89196391	89196728	338	*	20	+	Intron (uc002bmu.1/3669, intron 2 of 2)	15	89182277	89198879	16603	1	3669	uc010upn.1	14114	ENSG00000172183	ISG20	interferon stimulated exonuclease gene 20	FALSE	FALSE	FALSE	FALSE	FALSE	FALSE
20200205_TTNGFP_D4_GATA6ChIP_001_peak_10067	chr15	89284826	89285241	416	*	24.1	+	Distal Intergenic	15	89346674	89394755	48082	1	176	uc002bmx.3	-61433	ENSG00000157766	ACAN	aggrecan	FALSE	TRUE	TRUE	FALSE	FALSE	FALSE
20200205_TTNGFP_D4_GATA6ChIP_001_peak_10068	chr15	89355344	89355461	118	*	17.4	+	Intron (uc002bmx.3/176, intron 1 of 9)	15	89346674	89418585	71912	1	176	uc010upp.1	8670	ENSG00000157766	ACAN	aggrecan	FALSE	TRUE	TRUE	FALSE	FALSE	TRUE
20200205_TTNGFP_D4_GATA6ChIP_001_peak_10069	chr15	89377671	89377825	155	*	13.9	+	Intron (uc002bmx.3/176, intron 1 of 9)	15	89346674	89418585	71912	1	176	uc010upp.1	30997	ENSG00000157766	ACAN	aggrecan	FALSE	TRUE	TRUE	FALSE	TRUE	TRUE
20200205_TTNGFP_D4_GATA6ChIP_001_peak_10070	chr15	89385314	89385501	188	*	13.6	+	Intron (uc002bmx.3/176, intron 5 of 9)	15	89346674	89418585	71912	1	176	uc010upp.1	38640	ENSG00000157766	ACAN	aggrecan	FALSE	TRUE	TRUE	FALSE	FALSE	FALSE
20200205_TTNGFP_D4_GATA6ChIP_001_peak_10077	chr15	89912413	89912543	131	*	9.5	+	Promoter (1-2kb)	15	89911330	89941718	30389	1	254559	uc002bnv.2	1083	ENSG00000255571	MIR9-3HG	MIR9-3 host gene	FALSE	FALSE	FALSE	FALSE	FALSE	FALSE
20200205_TTNGFP_D4_GATA6ChIP_001_peak_10078	chr15	89930758	89930946	189	*	21.8	+	Exon (uc002bnv.2/254559, exon 3 of 7)	15	89921273	89941718	20446	1	254559	uc002bnw.2	9485	ENSG00000255571	MIR9-3HG	MIR9-3 host gene	FALSE	FALSE	FALSE	FALSE	FALSE	FALSE
20200205_TTNGFP_D4_GATA6ChIP_001_peak_10079	chr15	89990914	89991095	182	*	16	+	Distal Intergenic	15	90014638	90039799	25162	2	51458	uc002bnz.2	48704	ENSG00000140519	RHCG	Rh family C glycoprotein	FALSE	FALSE	FALSE	FALSE	FALSE	FALSE
20200205_TTNGFP_D4_GATA6ChIP_001_peak_1008	chr1	16742278	16742503	226	*	20.6	+	Intron (uc001ayl.1/374955, intron 5 of 16)	1	16722176	16763919	41744	2	374955	uc001ayl.1	21416	ENSG00000187144	SPATA21	spermatogenesis associated 21	FALSE	FALSE	FALSE	FALSE	FALSE	FALSE
20200205_TTNGFP_D4_GATA6ChIP_001_peak_10080	chr15	90004595	90004886	292	*	23.8	+	Distal Intergenic	15	90014638	90039799	25162	2	51458	uc002bnz.2	34913	ENSG00000140519	RHCG	Rh family C glycoprotein	FALSE	FALSE	FALSE	FALSE	FALSE	FALSE
20200205_TTNGFP_D4_GATA6ChIP_001_peak_10084	chr15	90173536	90173811	276	*	21	+	Exon (uc010upw.1/374654, exon 11 of 14)	15	90171201	90190943	19743	2	374654	uc010upw.1	17132	ENSG00000166813	KIF7	kinesin family member 7	FALSE	FALSE	FALSE	FALSE	FALSE	FALSE
20200205_TTNGFP_D4_GATA6ChIP_001_peak_10085	chr15	90175072	90175482	411	*	32.1	+	Intron (uc010upw.1/374654, intron 9 of 13)	15	90171201	90190943	19743	2	374654	uc010upw.1	15461	ENSG00000166813	KIF7	kinesin family member 7	FALSE	FALSE	FALSE	FALSE	FALSE	FALSE
20200205_TTNGFP_D4_GATA6ChIP_001_peak_10088	chr15	90303509	90303796	288	*	25.3	+	Promoter (<=1kb)	15	90303822	90321982	18161	1	145873	uc010uqa.2	-26	ENSG00000188095	MESP2	mesoderm posterior bHLH transcription factor 2	TRUE	FALSE	TRUE	FALSE	TRUE	FALSE
20200205_TTNGFP_D4_GATA6ChIP_001_peak_10089	chr15	90319169	90319657	489	*	27.2	+	Promoter (<=1kb)	15	90319589	90321982	2394	1	145873	uc002bon.3	0	ENSG00000188095	MESP2	mesoderm posterior bHLH transcription factor 2	FALSE	FALSE	TRUE	FALSE	TRUE	FALSE
20200205_TTNGFP_D4_GATA6ChIP_001_peak_10090	chr15	90326646	90327751	1106	*	80.7	+	Downstream (<1kb)	15	90319589	90321982	2394	1	145873	uc002bon.3	7057	ENSG00000188095	MESP2	mesoderm posterior bHLH transcription factor 2	FALSE	FALSE	TRUE	FALSE	TRUE	TRUE
20200205_TTNGFP_D4_GATA6ChIP_001_peak_10092	chr15	90358314	90358495	182	*	11.4	+	Promoter (<=1kb)	15	90328126	90358072	29947	2	290	uc002bop.4	-242	ENSG00000166825	ANPEP	alanyl aminopeptidase, membrane	TRUE	FALSE	FALSE	FALSE	FALSE	FALSE
20200205_TTNGFP_D4_GATA6ChIP_001_peak_10093	chr15	90370516	90370651	136	*	11.4	+	Distal Intergenic	15	90328126	90358072	29947	2	290	uc002bop.4	-12444	ENSG00000166825	ANPEP	alanyl aminopeptidase, membrane	FALSE	FALSE	FALSE	FALSE	FALSE	FALSE
20200205_TTNGFP_D4_GATA6ChIP_001_peak_10094	chr15	90554400	90554549	150	*	11	+	Intron (uc002bov.2/374655, intron 1 of 4)	15	90544752	90625432	80681	1	374655	uc002bov.2	9648	ENSG00000140548	ZNF710	zinc finger protein 710	FALSE	FALSE	TRUE	FALSE	FALSE	FALSE
20200205_TTNGFP_D4_GATA6ChIP_001_peak_10095	chr15	90579744	90579915	172	*	12.1	+	Intron (uc002bov.2/374655, intron 1 of 4)	15	90544752	90625432	80681	1	374655	uc002bov.2	34992	ENSG00000140548	ZNF710	zinc finger protein 710	FALSE	FALSE	TRUE	FALSE	FALSE	FALSE
20200205_TTNGFP_D4_GATA6ChIP_001_peak_10097	chr15	90588771	90588936	166	*	16.3	+	Intron (uc002bov.2/374655, intron 1 of 4)	15	90544752	90625432	80681	1	374655	uc002bov.2	44019	ENSG00000140548	ZNF710	zinc finger protein 710	TRUE	FALSE	TRUE	FALSE	FALSE	FALSE
20200205_TTNGFP_D4_GATA6ChIP_001_peak_10098	chr15	90607328	90607519	192	*	13.3	+	Intron (uc002bov.2/374655, intron 1 of 4)	15	90627212	90643927	16716	2	3418	uc010uqb.2	36408	ENSG00000182054	IDH2	isocitrate dehydrogenase (NADP(+)) 2, mitochondrial	FALSE	TRUE	TRUE	TRUE	FALSE	FALSE
20200205_TTNGFP_D4_GATA6ChIP_001_peak_1010	chr1	16802220	16802574	355	*	21	+	Exon (uc001ayt.2/114819, exon 14 of 15)	1	16804750	16817579	12830	2	114819	uc001ays.2	15005	ENSG00000080947	CROCCP3	CROCC pseudogene 3	FALSE	FALSE	FALSE	FALSE	FALSE	FALSE
20200205_TTNGFP_D4_GATA6ChIP_001_peak_10100	chr15	90622521	90622837	317	*	23.8	+	Intron (uc002bov.2/374655, intron 4 of 4)	15	90627212	90643927	16716	2	3418	uc010uqb.2	21090	ENSG00000182054	IDH2	isocitrate dehydrogenase (NADP(+)) 2, mitochondrial	FALSE	TRUE	TRUE	TRUE	FALSE	FALSE
20200205_TTNGFP_D4_GATA6ChIP_001_peak_10101	chr15	90628404	90628775	372	*	29.8	+	Exon (uc010uqb.2/3418, exon 8 of 11)	15	90627212	90643927	16716	2	3418	uc010uqb.2	15152	ENSG00000182054	IDH2	isocitrate dehydrogenase (NADP(+)) 2, mitochondrial	FALSE	TRUE	TRUE	TRUE	FALSE	FALSE
20200205_TTNGFP_D4_GATA6ChIP_001_peak_10102	chr15	90686510	90686932	423	*	57.1	+	Distal Intergenic	15	90627212	90645708	18497	2	3418	uc010uqc.2	-40802	ENSG00000182054	IDH2	isocitrate dehydrogenase (NADP(+)) 2, mitochondrial	TRUE	TRUE	TRUE	TRUE	TRUE	TRUE
20200205_TTNGFP_D4_GATA6ChIP_001_peak_10103	chr15	90727662	90727805	144	*	15.6	+	Promoter (<=1kb)	15	90728152	90772892	44741	1	10509	uc002boy.3	-347	ENSG00000185033	SEMA4B	semaphorin 4B	FALSE	FALSE	FALSE	FALSE	FALSE	FALSE
20200205_TTNGFP_D4_GATA6ChIP_001_peak_10104	chr15	90767930	90768093	164	*	8.2	+	Intron (uc002boy.3/10509, intron 10 of 14)	15	90762440	90772892	10453	1	10509	uc002bpa.3	5490	ENSG00000185033	SEMA4B	semaphorin 4B	FALSE	FALSE	FALSE	FALSE	FALSE	FALSE
20200205_TTNGFP_D4_GATA6ChIP_001_peak_10109	chr15	91208918	91209050	133	*	10.6	+	Distal Intergenic	15	91260579	91358686	98108	1	641	uc002bpr.3	-51529	ENSG00000197299	BLM	BLM RecQ like helicase	FALSE	FALSE	FALSE	FALSE	FALSE	TRUE
20200205_TTNGFP_D4_GATA6ChIP_001_peak_1011	chr1	16809784	16810034	251	*	18	+	Exon (uc001ayt.2/114819, exon 10 of 15)	1	16804750	16817579	12830	2	114819	uc001ays.2	7545	ENSG00000080947	CROCCP3	CROCC pseudogene 3	FALSE	FALSE	FALSE	FALSE	FALSE	FALSE
20200205_TTNGFP_D4_GATA6ChIP_001_peak_10110	chr15	91216982	91217202	221	*	18.3	+	Distal Intergenic	15	91260579	91358686	98108	1	641	uc002bpr.3	-43377	ENSG00000197299	BLM	BLM RecQ like helicase	FALSE	FALSE	FALSE	FALSE	FALSE	FALSE
20200205_TTNGFP_D4_GATA6ChIP_001_peak_10111	chr15	91357838	91358003	166	*	22.7	+	Intron (uc002bpr.3/641, intron 21 of 21)	15	91411885	91426687	14803	1	5045	uc002bpu.1	-53882	ENSG00000140564	FURIN	furin, paired basic amino acid cleaving enzyme	FALSE	FALSE	FALSE	FALSE	FALSE	FALSE
20200205_TTNGFP_D4_GATA6ChIP_001_peak_10112	chr15	91380346	91380494	149	*	20.6	+	Distal Intergenic	15	91411885	91426687	14803	1	5045	uc002bpu.1	-31391	ENSG00000140564	FURIN	furin, paired basic amino acid cleaving enzyme	FALSE	FALSE	FALSE	FALSE	FALSE	FALSE
20200205_TTNGFP_D4_GATA6ChIP_001_peak_10113	chr15	91417191	91417748	558	*	50.1	+	Intron (uc002bpu.1/5045, intron 1 of 15)	15	91411885	91426687	14803	1	5045	uc002bpu.1	5306	ENSG00000140564	FURIN	furin, paired basic amino acid cleaving enzyme	FALSE	FALSE	FALSE	FALSE	TRUE	TRUE
20200205_TTNGFP_D4_GATA6ChIP_001_peak_10116	chr15	91426150	91426290	141	*	12.6	+	Promoter (1-2kb)	15	91427665	91439006	11342	1	2242	uc002bpv.3	-1375	ENSG00000182511	FES	FES proto-oncogene, tyrosine kinase	FALSE	FALSE	FALSE	FALSE	FALSE	FALSE
20200205_TTNGFP_D4_GATA6ChIP_001_peak_10117	chr15	91432237	91432356	120	*	10.7	+	Intron (uc002bpv.3/2242, intron 5 of 18)	15	91428267	91439006	10740	1	2242	uc010bny.3	3970	ENSG00000182511	FES	FES proto-oncogene, tyrosine kinase	FALSE	FALSE	FALSE	FALSE	FALSE	FALSE
20200205_TTNGFP_D4_GATA6ChIP_001_peak_10118	chr15	91447959	91448108	150	*	15.1	+	Promoter (<=1kb)	15	91447420	91465815	18396	1	4122	uc002bqc.3	539	ENSG00000196547	MAN2A2	mannosidase alpha class 2A member 2	FALSE	FALSE	FALSE	FALSE	FALSE	FALSE
20200205_TTNGFP_D4_GATA6ChIP_001_peak_10119	chr15	91453663	91454376	714	*	52.4	+	Promoter (<=1kb)	15	91455273	91463624	8352	1	4122	uc010uqn.1	-897	ENSG00000196547	MAN2A2	mannosidase alpha class 2A member 2	FALSE	FALSE	FALSE	FALSE	FALSE	FALSE
20200205_TTNGFP_D4_GATA6ChIP_001_peak_1012	chr1	16840790	16840996	207	*	24.5	+	Distal Intergenic	1	16793931	16819196	25266	2	114819	uc001ayt.2	-21594	ENSG00000080947	CROCCP3	CROCC pseudogene 3	FALSE	FALSE	FALSE	FALSE	FALSE	FALSE
20200205_TTNGFP_D4_GATA6ChIP_001_peak_10120	chr15	91454601	91454732	132	*	15.6	+	Promoter (<=1kb)	15	91455273	91463624	8352	1	4122	uc010uqn.1	-541	ENSG00000196547	MAN2A2	mannosidase alpha class 2A member 2	FALSE	FALSE	FALSE	FALSE	FALSE	FALSE
20200205_TTNGFP_D4_GATA6ChIP_001_peak_10122	chr15	91455561	91455729	169	*	11.8	+	Promoter (<=1kb)	15	91455273	91463624	8352	1	4122	uc010uqn.1	288	ENSG00000196547	MAN2A2	mannosidase alpha class 2A member 2	FALSE	FALSE	FALSE	FALSE	FALSE	FALSE
20200205_TTNGFP_D4_GATA6ChIP_001_peak_10124	chr15	91496984	91497138	155	*	19.7	+	Promoter (<=1kb)	15	91498106	91506355	8250	1	91433	uc002bqj.3	-968	ENSG00000166965	RCCD1	RCC1 domain containing 1	FALSE	FALSE	FALSE	FALSE	FALSE	FALSE
20200205_TTNGFP_D4_GATA6ChIP_001_peak_10125	chr15	91501080	91501213	134	*	10.4	+	Promoter (1-2kb)	15	91499842	91506355	6514	1	91433	uc010bob.4	1238	ENSG00000166965	RCCD1	RCC1 domain containing 1	FALSE	FALSE	FALSE	FALSE	FALSE	FALSE
20200205_TTNGFP_D4_GATA6ChIP_001_peak_10126	chr15	91537563	91537704	142	*	12	+	Promoter (<=1kb)	15	91509268	91537881	28614	2	9055	uc002bqm.4	177	ENSG00000198901	PRC1	protein regulator of cytokinesis 1	FALSE	FALSE	FALSE	TRUE	FALSE	FALSE
20200205_TTNGFP_D4_GATA6ChIP_001_peak_10127	chr15	91577968	91578242	275	*	18.6	+	Distal Intergenic	15	91541774	91565833	24060	2	26276	uc010uqu.1	-12135	ENSG00000184056	VPS33B	VPS33B late endosome and lysosome associated	FALSE	FALSE	FALSE	FALSE	FALSE	FALSE
20200205_TTNGFP_D4_GATA6ChIP_001_peak_10128	chr15	92170872	92171025	154	*	15.3	+	Distal Intergenic	15	92396938	92709137	312200	1	28232	uc002bqx.2	-225913	ENSG00000176463	SLCO3A1	solute carrier organic anion transporter family member 3A1	FALSE	FALSE	FALSE	TRUE	TRUE	TRUE
20200205_TTNGFP_D4_GATA6ChIP_001_peak_1013	chr1	16849709	16849914	206	*	14.7	+	Distal Intergenic	1	16875409	16875482	74	1	100500876	uc021ogu.1	-25495	ENSG00000263811	MIR3675	microRNA 3675	FALSE	FALSE	FALSE	FALSE	FALSE	FALSE
20200205_TTNGFP_D4_GATA6ChIP_001_peak_10130	chr15	92669325	92669462	138	*	9.7	+	Exon (uc002bqx.2/28232, exon 6 of 10)	15	92937140	93011958	74819	1	8128	uc002bra.3	-267678	ENSG00000140557	ST8SIA2	ST8 alpha-N-acetyl-neuraminide alpha-2,8-sialyltransferase 2	FALSE	FALSE	TRUE	FALSE	FALSE	FALSE
20200205_TTNGFP_D4_GATA6ChIP_001_peak_10131	chr15	92887333	92887595	263	*	18	+	Distal Intergenic	15	92937140	93011958	74819	1	8128	uc002bra.3	-49545	ENSG00000140557	ST8SIA2	ST8 alpha-N-acetyl-neuraminide alpha-2,8-sialyltransferase 2	TRUE	FALSE	TRUE	FALSE	TRUE	FALSE
20200205_TTNGFP_D4_GATA6ChIP_001_peak_10132	chr15	93277140	93277318	179	*	17.6	+	Promoter (<=1kb)	15	93160679	93277304	116626	2	400451	uc002bsl.4	0	ENSG00000185442	FAM174B	family with sequence similarity 174 member B	FALSE	FALSE	FALSE	TRUE	TRUE	TRUE
20200205_TTNGFP_D4_GATA6ChIP_001_peak_10133	chr15	93309856	93309979	124	*	11.7	+	Distal Intergenic	15	93338714	93340338	1625	1	728619	uc021svm.2	-28735	NA	ASB9P1	ankyrin repeat and SOCS box containing 9 pseudogene 1	FALSE	FALSE	FALSE	FALSE	FALSE	FALSE
20200205_TTNGFP_D4_GATA6ChIP_001_peak_10135	chr15	93591000	93591139	140	*	20.1	+	Intron (uc002bsq.2/56963, intron 2 of 2)	15	93586636	93616389	29754	2	56963	uc002bsq.2	25250	ENSG00000182175	RGMA	repulsive guidance molecule BMP co-receptor a	FALSE	TRUE	FALSE	FALSE	FALSE	FALSE
20200205_TTNGFP_D4_GATA6ChIP_001_peak_10136	chr15	93609035	93609226	192	*	19.2	+	5' UTR	15	93586636	93616389	29754	2	56963	uc002bsq.2	7163	ENSG00000182175	RGMA	repulsive guidance molecule BMP co-receptor a	FALSE	TRUE	FALSE	FALSE	FALSE	FALSE
20200205_TTNGFP_D4_GATA6ChIP_001_peak_10138	chr15	93723080	93723422	343	*	20.1	+	Distal Intergenic	15	93586636	93632443	45808	2	56963	uc002bss.2	-90637	ENSG00000182175	RGMA	repulsive guidance molecule BMP co-receptor a	FALSE	TRUE	FALSE	FALSE	FALSE	FALSE
20200205_TTNGFP_D4_GATA6ChIP_001_peak_10139	chr15	93788440	93788688	249	*	26.9	+	Distal Intergenic	15	93586636	93632443	45808	2	56963	uc002bss.2	-155997	ENSG00000182175	RGMA	repulsive guidance molecule BMP co-receptor a	FALSE	TRUE	FALSE	FALSE	FALSE	FALSE
20200205_TTNGFP_D4_GATA6ChIP_001_peak_1014	chr1	16912900	16913171	272	*	23.6	+	Promoter (<=1kb)	1	16892903	16913756	20854	2	55672	uc001ayz.1	585	ENSG00000219481	NBPF1	NBPF member 1	FALSE	FALSE	FALSE	FALSE	FALSE	FALSE
20200205_TTNGFP_D4_GATA6ChIP_001_peak_10141	chr15	94444083	94444346	264	*	15.7	+	Intron (uc002btf.1/uc002btf.1, intron 1 of 3)	15	94774801	94887288	112488	1	55784	uc002btg.4	-330455	ENSG00000140563	MCTP2	multiple C2 and transmembrane domain containing 2	FALSE	TRUE	FALSE	TRUE	FALSE	FALSE
20200205_TTNGFP_D4_GATA6ChIP_001_peak_10143	chr15	95399436	95399586	151	*	12.1	+	Promoter (<=1kb)	15	95398592	95400293	1702	1	440311	uc031quc.1	844	ENSG00000277654	LOC440311	NOP53 ribosome biogenesis factor pseudogene	FALSE	FALSE	FALSE	FALSE	FALSE	FALSE
20200205_TTNGFP_D4_GATA6ChIP_001_peak_10145	chr15	96866748	96866877	130	*	10	+	Promoter (2-3kb)	15	96869157	96883492	14336	1	7026	uc002btp.3	-2280	ENSG00000185551	NR2F2	nuclear receptor subfamily 2 group F member 2	FALSE	FALSE	TRUE	TRUE	FALSE	FALSE
20200205_TTNGFP_D4_GATA6ChIP_001_peak_10147	chr15	97034975	97035165	191	*	8.5	+	Distal Intergenic	15	96876569	96883492	6924	1	7026	uc010urk.2	158406	ENSG00000185551	NR2F2	nuclear receptor subfamily 2 group F member 2	FALSE	FALSE	TRUE	TRUE	TRUE	TRUE
20200205_TTNGFP_D4_GATA6ChIP_001_peak_10148	chr15	97513315	97513731	417	*	34.8	+	Distal Intergenic	15	97326679	97328845	2167	1	145946	uc002bue.3	186636	ENSG00000185594	SPATA8	spermatogenesis associated 8	TRUE	FALSE	FALSE	FALSE	TRUE	TRUE
20200205_TTNGFP_D4_GATA6ChIP_001_peak_10149	chr15	98417512	98417638	127	*	13.6	+	Promoter (<=1kb)	15	98285846	98417659	131814	2	91948	uc002bug.1	21	ENSG00000251209	LINC00923	long intergenic non-protein coding RNA 923	TRUE	FALSE	FALSE	FALSE	FALSE	FALSE
20200205_TTNGFP_D4_GATA6ChIP_001_peak_1015	chr1	16935094	16935243	150	*	31.8	+	5' UTR	1	16931913	16939752	7840	2	55672	uc001azb.1	4509	ENSG00000219481	NBPF1	NBPF member 1	FALSE	FALSE	FALSE	FALSE	FALSE	FALSE
20200205_TTNGFP_D4_GATA6ChIP_001_peak_10150	chr15	98447370	98447524	155	*	11.8	+	Distal Intergenic	15	98462784	98517068	54285	1	91947	uc002bui.4	-15260	ENSG00000140450	ARRDC4	arrestin domain containing 4	FALSE	FALSE	FALSE	FALSE	TRUE	TRUE
20200205_TTNGFP_D4_GATA6ChIP_001_peak_10151	chr15	98503509	98503798	290	*	45.7	+	Promoter (<=1kb)	15	98503933	98517068	13136	1	91947	uc010bom.3	-135	ENSG00000140450	ARRDC4	arrestin domain containing 4	TRUE	FALSE	FALSE	FALSE	TRUE	TRUE
20200205_TTNGFP_D4_GATA6ChIP_001_peak_10152	chr15	98633372	98633630	259	*	13.3	+	Distal Intergenic	15	98503933	98517068	13136	1	91947	uc010bom.3	129439	ENSG00000140450	ARRDC4	arrestin domain containing 4	FALSE	FALSE	FALSE	FALSE	FALSE	FALSE
20200205_TTNGFP_D4_GATA6ChIP_001_peak_10154	chr15	98809426	98809619	194	*	14.8	+	Distal Intergenic	15	98980391	99057611	77221	2	283777	uc002buk.1	247992	ENSG00000283597	FAM169B	family with sequence similarity 169 member B	FALSE	FALSE	FALSE	FALSE	FALSE	FALSE
20200205_TTNGFP_D4_GATA6ChIP_001_peak_10155	chr15	98843145	98843265	121	*	13.9	+	Distal Intergenic	15	98980391	99057611	77221	2	283777	uc002buk.1	214346	ENSG00000283597	FAM169B	family with sequence similarity 169 member B	FALSE	FALSE	FALSE	FALSE	FALSE	FALSE
20200205_TTNGFP_D4_GATA6ChIP_001_peak_1016	chr1	16939332	16939524	193	*	20	+	Promoter (<=1kb)	1	16931913	16939752	7840	2	55672	uc001azb.1	228	ENSG00000219481	NBPF1	NBPF member 1	FALSE	FALSE	FALSE	FALSE	FALSE	FALSE
20200205_TTNGFP_D4_GATA6ChIP_001_peak_10162	chr15	99663800	99663939	140	*	13.2	+	Intron (uc002buo.3/23336, intron 3 of 5)	15	99645286	99675800	30515	1	23336	uc002buq.3	18514	ENSG00000182253	SYNM	synemin	FALSE	TRUE	TRUE	FALSE	FALSE	FALSE
20200205_TTNGFP_D4_GATA6ChIP_001_peak_10163	chr15	99672023	99672237	215	*	15.1	+	Exon (uc002bup.3/23336, exon 5 of 5)	15	99645286	99675800	30515	1	23336	uc002buq.3	26737	ENSG00000182253	SYNM	synemin	FALSE	TRUE	TRUE	FALSE	FALSE	FALSE
20200205_TTNGFP_D4_GATA6ChIP_001_peak_10166	chr15	99955066	99955253	188	*	25	+	Distal Intergenic	15	100106133	100256629	150497	1	4205	uc002bve.3	-150880	ENSG00000068305	MEF2A	myocyte enhancer factor 2A	FALSE	FALSE	FALSE	FALSE	FALSE	FALSE
20200205_TTNGFP_D4_GATA6ChIP_001_peak_10167	chr15	99972313	99972575	263	*	22.4	+	Distal Intergenic	15	100106133	100256629	150497	1	4205	uc002bve.3	-133558	ENSG00000068305	MEF2A	myocyte enhancer factor 2A	FALSE	FALSE	FALSE	FALSE	FALSE	FALSE
20200205_TTNGFP_D4_GATA6ChIP_001_peak_1017	chr1	16940081	16940218	138	*	23	+	Promoter (<=1kb)	1	16888922	16940100	51179	2	55672	uc001ayw.4	0	ENSG00000219481	NBPF1	NBPF member 1	FALSE	FALSE	FALSE	FALSE	TRUE	TRUE
20200205_TTNGFP_D4_GATA6ChIP_001_peak_10170	chr15	100183872	100184013	142	*	12.3	+	Intron (uc002bve.3/4205, intron 3 of 11)	15	100173183	100256629	83447	1	4205	uc010bot.3	10689	ENSG00000068305	MEF2A	myocyte enhancer factor 2A	FALSE	FALSE	FALSE	FALSE	FALSE	FALSE
20200205_TTNGFP_D4_GATA6ChIP_001_peak_10171	chr15	100332125	100332443	319	*	14.8	+	Exon (uc021sxl.1/196968, exon 2 of 2)	15	100330361	100335657	5297	2	196968	uc021sxl.1	3214	ENSG00000182397	DNM1P46	dynamin 1 pseudogene 46	FALSE	FALSE	FALSE	FALSE	FALSE	FALSE
20200205_TTNGFP_D4_GATA6ChIP_001_peak_10172	chr15	100449416	100449701	286	*	31.8	+	Distal Intergenic	15	100513161	100516476	3316	2	170691	uc002bvw.1	66775	ENSG00000140470	ADAMTS17	ADAM metallopeptidase with thrombospondin type 1 motif 17	FALSE	TRUE	TRUE	FALSE	FALSE	FALSE
20200205_TTNGFP_D4_GATA6ChIP_001_peak_10173	chr15	100514591	100514724	134	*	10.9	+	Promoter (1-2kb)	15	100513161	100516476	3316	2	170691	uc002bvw.1	1752	ENSG00000140470	ADAMTS17	ADAM metallopeptidase with thrombospondin type 1 motif 17	FALSE	TRUE	TRUE	FALSE	FALSE	FALSE
20200205_TTNGFP_D4_GATA6ChIP_001_peak_10174	chr15	100548276	100548457	182	*	18	+	Intron (uc002bvv.1/170691, intron 18 of 21)	15	100513161	100516476	3316	2	170691	uc002bvw.1	-31800	ENSG00000140470	ADAMTS17	ADAM metallopeptidase with thrombospondin type 1 motif 17	FALSE	TRUE	TRUE	FALSE	FALSE	FALSE
20200205_TTNGFP_D4_GATA6ChIP_001_peak_10176	chr15	100633739	100633962	224	*	9.7	+	Intron (uc002bvv.1/170691, intron 15 of 21)	15	100513161	100516476	3316	2	170691	uc002bvw.1	-117263	ENSG00000140470	ADAMTS17	ADAM metallopeptidase with thrombospondin type 1 motif 17	FALSE	TRUE	TRUE	FALSE	FALSE	FALSE
20200205_TTNGFP_D4_GATA6ChIP_001_peak_10177	chr15	100690775	100691053	279	*	19.1	+	Intron (uc002bvv.1/170691, intron 10 of 21)	15	100513161	100516476	3316	2	170691	uc002bvw.1	-174299	ENSG00000140470	ADAMTS17	ADAM metallopeptidase with thrombospondin type 1 motif 17	FALSE	TRUE	TRUE	FALSE	FALSE	FALSE
20200205_TTNGFP_D4_GATA6ChIP_001_peak_10179	chr15	100733250	100733423	174	*	20.3	+	Intron (uc002bvv.1/170691, intron 8 of 21)	15	100603819	100879305	275487	2	170691	uc002bvx.1	145882	ENSG00000140470	ADAMTS17	ADAM metallopeptidase with thrombospondin type 1 motif 17	FALSE	TRUE	TRUE	FALSE	FALSE	FALSE
20200205_TTNGFP_D4_GATA6ChIP_001_peak_1018	chr1	16946279	16946936	658	*	71.7	+	Exon (uc010ocf.2/84809, exon 3 of 4)	1	16944751	16952994	8244	2	84809	uc010ocf.2	6058	ENSG00000215908	CROCCP2	CROCC pseudogene 2	TRUE	FALSE	FALSE	FALSE	FALSE	FALSE
20200205_TTNGFP_D4_GATA6ChIP_001_peak_10182	chr15	100805720	100805995	276	*	24.4	+	Intron (uc002bvv.1/170691, intron 4 of 21)	15	100603819	100879305	275487	2	170691	uc002bvx.1	73310	ENSG00000140470	ADAMTS17	ADAM metallopeptidase with thrombospondin type 1 motif 17	FALSE	TRUE	TRUE	FALSE	FALSE	FALSE
20200205_TTNGFP_D4_GATA6ChIP_001_peak_10186	chr15	101225948	101226094	147	*	9.5	+	Distal Intergenic	15	101142755	101191904	49150	1	140460	uc002bwk.3	83193	ENSG00000183475	ASB7	ankyrin repeat and SOCS box containing 7	FALSE	FALSE	FALSE	FALSE	FALSE	FALSE
20200205_TTNGFP_D4_GATA6ChIP_001_peak_10187	chr15	101246060	101246570	511	*	26.3	+	Distal Intergenic	15	101142755	101191904	49150	1	140460	uc002bwk.3	103305	ENSG00000183475	ASB7	ankyrin repeat and SOCS box containing 7	TRUE	FALSE	FALSE	FALSE	FALSE	FALSE
20200205_TTNGFP_D4_GATA6ChIP_001_peak_10189	chr15	101420049	101420244	196	*	7.3	+	Promoter (<=1kb)	15	101420009	101456830	36822	1	220	uc010bpb.3	40	ENSG00000184254	ALDH1A3	aldehyde dehydrogenase 1 family member A3	FALSE	FALSE	TRUE	FALSE	FALSE	TRUE
20200205_TTNGFP_D4_GATA6ChIP_001_peak_10190	chr15	101442995	101443125	131	*	8	+	Intron (uc002bwn.4/220, intron 9 of 12)	15	101459460	101529704	70245	1	79705	uc002bwq.1	-16335	ENSG00000154237	LRRK1	leucine rich repeat kinase 1	FALSE	FALSE	FALSE	FALSE	FALSE	FALSE
20200205_TTNGFP_D4_GATA6ChIP_001_peak_10191	chr15	101569374	101569547	174	*	17.4	+	Exon (uc002bwr.3/79705, exon 20 of 34)	15	101593428	101610317	16890	1	79705	uc002bws.3	-23881	ENSG00000154237	LRRK1	leucine rich repeat kinase 1	FALSE	FALSE	FALSE	FALSE	FALSE	FALSE
20200205_TTNGFP_D4_GATA6ChIP_001_peak_10192	chr15	101607118	101607554	437	*	30.6	+	Exon (uc002bws.3/79705, exon 9 of 10)	15	101593428	101610317	16890	1	79705	uc002bws.3	13690	ENSG00000154237	LRRK1	leucine rich repeat kinase 1	FALSE	FALSE	FALSE	FALSE	FALSE	FALSE
20200205_TTNGFP_D4_GATA6ChIP_001_peak_10194	chr15	101648646	101649153	508	*	34.7	+	Distal Intergenic	15	101593428	101610317	16890	1	79705	uc002bws.3	55218	ENSG00000154237	LRRK1	leucine rich repeat kinase 1	TRUE	FALSE	FALSE	FALSE	FALSE	TRUE
20200205_TTNGFP_D4_GATA6ChIP_001_peak_10196	chr15	101677512	101677635	124	*	7.1	+	Distal Intergenic	15	101715928	101728266	12339	2	22856	uc010usd.2	50631	ENSG00000131873	CHSY1	chondroitin sulfate synthase 1	FALSE	FALSE	FALSE	FALSE	FALSE	FALSE
20200205_TTNGFP_D4_GATA6ChIP_001_peak_10197	chr15	101689391	101689829	439	*	50.7	+	Distal Intergenic	15	101715928	101728266	12339	2	22856	uc010usd.2	38437	ENSG00000131873	CHSY1	chondroitin sulfate synthase 1	TRUE	FALSE	FALSE	FALSE	TRUE	TRUE
20200205_TTNGFP_D4_GATA6ChIP_001_peak_10198	chr15	101708018	101708201	184	*	16.7	+	Distal Intergenic	15	101715928	101728266	12339	2	22856	uc010usd.2	20065	ENSG00000131873	CHSY1	chondroitin sulfate synthase 1	FALSE	FALSE	FALSE	FALSE	FALSE	FALSE
20200205_TTNGFP_D4_GATA6ChIP_001_peak_10199	chr15	101714650	101714905	256	*	19.4	+	Downstream (1-2kb)	15	101715928	101728266	12339	2	22856	uc010usd.2	13361	ENSG00000131873	CHSY1	chondroitin sulfate synthase 1	FALSE	FALSE	FALSE	FALSE	FALSE	FALSE
20200205_TTNGFP_D4_GATA6ChIP_001_peak_1020	chr1	16949063	16949368	306	*	30.7	+	Intron (uc010ocf.2/84809, intron 2 of 3)	1	16944751	16952994	8244	2	84809	uc010ocf.2	3626	ENSG00000215908	CROCCP2	CROCC pseudogene 2	FALSE	FALSE	FALSE	FALSE	FALSE	FALSE
20200205_TTNGFP_D4_GATA6ChIP_001_peak_10200	chr15	101733608	101733787	180	*	12.6	+	Promoter (5-6kb)	15	101715928	101728266	12339	2	22856	uc010usd.2	-5342	ENSG00000131873	CHSY1	chondroitin sulfate synthase 1	FALSE	FALSE	FALSE	FALSE	FALSE	FALSE
20200205_TTNGFP_D4_GATA6ChIP_001_peak_10201	chr15	101835133	101835514	382	*	16.3	+	Promoter (<=1kb)	15	101821715	101835460	13746	2	6627	uc002bww.3	0	ENSG00000131876	SNRPA1	small nuclear ribonucleoprotein polypeptide A'	FALSE	FALSE	FALSE	FALSE	TRUE	TRUE
20200205_TTNGFP_D4_GATA6ChIP_001_peak_10202	chr15	101846075	101846211	137	*	9.1	+	Intron (uc010bpd.3/5046, intron 18 of 18)	15	101847456	101849509	2054	2	100507472	uc021sxx.1	3298	NA	LOC100507472	uncharacterized LOC100507472	FALSE	FALSE	FALSE	FALSE	FALSE	FALSE
20200205_TTNGFP_D4_GATA6ChIP_001_peak_10205	chr15	101866566	101866744	179	*	16.7	+	Exon (uc010bpd.3/5046, exon 13 of 19)	15	101847456	101849509	2054	2	100507472	uc021sxx.1	-17057	NA	LOC100507472	uncharacterized LOC100507472	FALSE	FALSE	FALSE	FALSE	FALSE	FALSE
20200205_TTNGFP_D4_GATA6ChIP_001_peak_10206	chr15	101870520	101870732	213	*	24.1	+	Intron (uc010bpd.3/5046, intron 12 of 18)	15	101847456	101849509	2054	2	100507472	uc021sxx.1	-21011	NA	LOC100507472	uncharacterized LOC100507472	FALSE	FALSE	FALSE	FALSE	FALSE	FALSE
20200205_TTNGFP_D4_GATA6ChIP_001_peak_10208	chr15	101910611	101910918	308	*	20.9	+	Exon (uc010bpd.3/5046, exon 9 of 19)	15	101847456	101849509	2054	2	100507472	uc021sxx.1	-61102	NA	LOC100507472	uncharacterized LOC100507472	TRUE	FALSE	FALSE	FALSE	FALSE	FALSE
20200205_TTNGFP_D4_GATA6ChIP_001_peak_1021	chr1	16950294	16950875	582	*	67.8	+	Promoter (2-3kb)	1	16944751	16952994	8244	2	84809	uc010ocf.2	2119	ENSG00000215908	CROCCP2	CROCC pseudogene 2	FALSE	FALSE	FALSE	FALSE	FALSE	FALSE
20200205_TTNGFP_D4_GATA6ChIP_001_peak_10212	chr15	101999942	102000114	173	*	11.2	+	Intron (uc002bwy.3/5046, intron 2 of 22)	15	101844133	101983865	139733	2	5046	uc010bpd.3	-16077	ENSG00000140479	PCSK6	proprotein convertase subtilisin/kexin type 6	FALSE	FALSE	FALSE	FALSE	FALSE	FALSE
20200205_TTNGFP_D4_GATA6ChIP_001_peak_10216	chr15	102070650	102070813	164	*	15.6	+	Distal Intergenic	15	101923953	102030187	106235	2	5046	uc002bxg.1	-40463	ENSG00000140479	PCSK6	proprotein convertase subtilisin/kexin type 6	FALSE	FALSE	FALSE	FALSE	FALSE	FALSE
20200205_TTNGFP_D4_GATA6ChIP_001_peak_10218	chr15	102081464	102081727	264	*	18.3	+	Distal Intergenic	15	101923953	102030187	106235	2	5046	uc002bxg.1	-51277	ENSG00000140479	PCSK6	proprotein convertase subtilisin/kexin type 6	TRUE	FALSE	FALSE	FALSE	FALSE	FALSE
20200205_TTNGFP_D4_GATA6ChIP_001_peak_10220	chr15	102307565	102307749	185	*	20.4	+	Distal Intergenic	15	102345923	102346861	939	1	390648	uc010utr.2	-38174	ENSG00000184140	OR4F6	olfactory receptor family 4 subfamily F member 6	FALSE	FALSE	FALSE	FALSE	TRUE	TRUE
20200205_TTNGFP_D4_GATA6ChIP_001_peak_10221	chr15	102506139	102506398	260	*	36.2	+	Promoter (<=1kb)	15	102506273	102507991	1719	1	374666	uc002cdj.3	0	NA	WASH3P	WASP family homolog 3, pseudogene	TRUE	FALSE	FALSE	FALSE	TRUE	TRUE
20200205_TTNGFP_D4_GATA6ChIP_001_peak_10222	chr16	70747	70979	233	*	16.8	+	Distal Intergenic	16	61555	64090	2536	1	100287029	uc010bqm.2	9192	ENSG00000233614	DDX11L10	DEAD/H-box helicase 11 like 10	FALSE	FALSE	FALSE	FALSE	FALSE	FALSE
20200205_TTNGFP_D4_GATA6ChIP_001_peak_10223	chr16	74261	74438	178	*	17.7	+	Exon (uc002cfh.3/uc002cfh.3, exon 2 of 2)	16	61555	64090	2536	1	100287029	uc010bqm.2	12706	ENSG00000233614	DDX11L10	DEAD/H-box helicase 11 like 10	FALSE	FALSE	FALSE	FALSE	FALSE	FALSE
20200205_TTNGFP_D4_GATA6ChIP_001_peak_10227	chr16	103342	103458	117	*	16.2	+	Promoter (<=1kb)	16	96979	103632	6654	2	51728	uc002cfi.2	174	ENSG00000161980	POLR3K	RNA polymerase III subunit K	FALSE	FALSE	FALSE	TRUE	FALSE	FALSE
20200205_TTNGFP_D4_GATA6ChIP_001_peak_10228	chr16	106629	106819	191	*	15.9	+	Promoter (2-3kb)	16	103829	107669	3841	1	79622	uc002cfj.4	2800	ENSG00000161981	SNRNP25	small nuclear ribonucleoprotein U11/U12 subunit 25	TRUE	FALSE	FALSE	TRUE	FALSE	FALSE
20200205_TTNGFP_D4_GATA6ChIP_001_peak_10229	chr16	108251	108392	142	*	13.9	+	3' UTR	16	103829	107669	3841	1	79622	uc002cfj.4	4422	ENSG00000161981	SNRNP25	small nuclear ribonucleoprotein U11/U12 subunit 25	FALSE	FALSE	FALSE	TRUE	FALSE	FALSE
20200205_TTNGFP_D4_GATA6ChIP_001_peak_1023	chr1	16952550	16953073	524	*	68.4	+	Promoter (<=1kb)	1	16944751	16952994	8244	2	84809	uc010ocf.2	0	ENSG00000215908	CROCCP2	CROCC pseudogene 2	FALSE	FALSE	FALSE	FALSE	FALSE	FALSE
20200205_TTNGFP_D4_GATA6ChIP_001_peak_10230	chr16	108914	109277	364	*	24.1	+	Exon (uc002cfl.4/64285, exon 16 of 18)	16	103829	107669	3841	1	79622	uc002cfj.4	5085	ENSG00000161981	SNRNP25	small nuclear ribonucleoprotein U11/U12 subunit 25	FALSE	FALSE	FALSE	TRUE	FALSE	FALSE
20200205_TTNGFP_D4_GATA6ChIP_001_peak_10231	chr16	109721	109890	170	*	17	+	Exon (uc002cfl.4/64285, exon 14 of 18)	16	103829	107669	3841	1	79622	uc002cfj.4	5892	ENSG00000161981	SNRNP25	small nuclear ribonucleoprotein U11/U12 subunit 25	FALSE	FALSE	FALSE	TRUE	FALSE	FALSE
20200205_TTNGFP_D4_GATA6ChIP_001_peak_10233	chr16	116124	116345	222	*	14.4	+	Intron (uc002cfl.4/64285, intron 1 of 17)	16	108058	122629	14572	2	64285	uc002cfl.4	6284	ENSG00000007384	RHBDF1	rhomboid 5 homolog 1	FALSE	FALSE	TRUE	FALSE	FALSE	FALSE
20200205_TTNGFP_D4_GATA6ChIP_001_peak_10236	chr16	124081	124207	127	*	22.1	+	Promoter (<=1kb)	16	111583	123966	12384	2	64285	uc010bqo.1	-115	ENSG00000007384	RHBDF1	rhomboid 5 homolog 1	FALSE	FALSE	TRUE	FALSE	FALSE	FALSE
20200205_TTNGFP_D4_GATA6ChIP_001_peak_10237	chr16	128971	129225	255	*	13.5	+	Promoter (<=1kb)	16	128169	135850	7682	1	4350	uc002cfo.4	802	ENSG00000103152	MPG	N-methylpurine DNA glycosylase	FALSE	FALSE	FALSE	FALSE	FALSE	FALSE
20200205_TTNGFP_D4_GATA6ChIP_001_peak_1024	chr1	16955016	16955494	479	*	44.8	+	Promoter (2-3kb)	1	16944751	16952994	8244	2	84809	uc010ocf.2	-2022	ENSG00000215908	CROCCP2	CROCC pseudogene 2	FALSE	FALSE	FALSE	FALSE	FALSE	FALSE
20200205_TTNGFP_D4_GATA6ChIP_001_peak_10240	chr16	136266	136410	145	*	14.4	+	3' UTR	16	128169	135850	7682	1	4350	uc002cfo.4	8097	ENSG00000103152	MPG	N-methylpurine DNA glycosylase	FALSE	FALSE	FALSE	FALSE	FALSE	FALSE
20200205_TTNGFP_D4_GATA6ChIP_001_peak_10241	chr16	151652	151804	153	*	18.8	+	Intron (uc010uua.1/8131, intron 5 of 12)	16	128169	135850	7682	1	4350	uc002cfo.4	23483	ENSG00000103152	MPG	N-methylpurine DNA glycosylase	FALSE	FALSE	FALSE	FALSE	FALSE	FALSE
20200205_TTNGFP_D4_GATA6ChIP_001_peak_10242	chr16	199051	199314	264	*	21	+	Promoter (3-4kb)	16	202854	204504	1651	1	3050	uc002cft.1	-3540	ENSG00000130656	HBZ	hemoglobin subunit zeta	FALSE	FALSE	FALSE	FALSE	FALSE	FALSE
20200205_TTNGFP_D4_GATA6ChIP_001_peak_10243	chr16	210342	210636	295	*	11.7	+	Promoter (5-6kb)	16	215973	216767	795	1	3042	uc002cfu.1	-5337	ENSG00000206177	HBM	hemoglobin subunit mu	FALSE	FALSE	FALSE	FALSE	FALSE	FALSE
20200205_TTNGFP_D4_GATA6ChIP_001_peak_10244	chr16	215753	216002	250	*	18.2	+	Promoter (<=1kb)	16	215973	216767	795	1	3042	uc002cfu.1	0	ENSG00000206177	HBM	hemoglobin subunit mu	TRUE	FALSE	FALSE	FALSE	FALSE	FALSE
20200205_TTNGFP_D4_GATA6ChIP_001_peak_10246	chr16	218739	218880	142	*	7.4	+	Promoter (2-3kb)	16	215973	216767	795	1	3042	uc002cfu.1	2766	ENSG00000206177	HBM	hemoglobin subunit mu	FALSE	FALSE	FALSE	FALSE	FALSE	FALSE
20200205_TTNGFP_D4_GATA6ChIP_001_peak_10247	chr16	239883	240116	234	*	16.8	+	3' UTR	16	230333	231178	846	1	3049	uc002cfz.3	9550	ENSG00000086506	HBQ1	hemoglobin subunit theta 1	FALSE	FALSE	FALSE	FALSE	FALSE	FALSE
20200205_TTNGFP_D4_GATA6ChIP_001_peak_10249	chr16	303500	303621	122	*	11.7	+	Intron (uc010bqr.2/83986, intron 2 of 7)	16	299548	316119	16572	1	83986	uc002cgh.3	3952	ENSG00000167930	FAM234A	family with sequence similarity 234 member A	FALSE	FALSE	FALSE	FALSE	FALSE	FALSE
20200205_TTNGFP_D4_GATA6ChIP_001_peak_1025	chr1	16956146	16956430	285	*	40.9	+	Promoter (1-2kb)	1	16944751	16957604	12854	2	84809	uc001aze.3	1174	ENSG00000215908	CROCCP2	CROCC pseudogene 2	FALSE	FALSE	FALSE	FALSE	FALSE	FALSE
20200205_TTNGFP_D4_GATA6ChIP_001_peak_10250	chr16	310124	310299	176	*	22.7	+	Exon (uc010bqr.2/83986, exon 4 of 8)	16	299548	316119	16572	1	83986	uc002cgh.3	10576	ENSG00000167930	FAM234A	family with sequence similarity 234 member A	FALSE	FALSE	FALSE	FALSE	FALSE	FALSE
20200205_TTNGFP_D4_GATA6ChIP_001_peak_10251	chr16	311739	311895	157	*	16.5	+	Intron (uc010bqr.2/83986, intron 5 of 7)	16	299548	316119	16572	1	83986	uc002cgh.3	12191	ENSG00000167930	FAM234A	family with sequence similarity 234 member A	FALSE	FALSE	FALSE	FALSE	FALSE	FALSE
20200205_TTNGFP_D4_GATA6ChIP_001_peak_10255	chr16	334987	335283	297	*	21.9	+	Promoter (2-3kb)	16	332615	337209	4595	1	64714	uc010bqt.1	2372	ENSG00000185615	PDIA2	protein disulfide isomerase family A member 2	FALSE	FALSE	FALSE	FALSE	FALSE	FALSE
20200205_TTNGFP_D4_GATA6ChIP_001_peak_10256	chr16	341348	341490	143	*	15.7	+	Intron (uc021szo.1/55692, intron 1 of 9)	16	332615	337209	4595	1	64714	uc010bqt.1	8733	ENSG00000185615	PDIA2	protein disulfide isomerase family A member 2	FALSE	FALSE	FALSE	FALSE	FALSE	FALSE
20200205_TTNGFP_D4_GATA6ChIP_001_peak_10257	chr16	347138	347285	148	*	17	+	Exon (uc002cgp.2/8312, exon 7 of 11)	16	332615	337209	4595	1	64714	uc010bqt.1	14523	ENSG00000185615	PDIA2	protein disulfide isomerase family A member 2	FALSE	FALSE	FALSE	FALSE	FALSE	FALSE
20200205_TTNGFP_D4_GATA6ChIP_001_peak_10259	chr16	356823	357051	229	*	24.8	+	Intron (uc021szo.1/55692, intron 1 of 9)	16	332615	337209	4595	1	64714	uc010bqt.1	24208	ENSG00000185615	PDIA2	protein disulfide isomerase family A member 2	FALSE	FALSE	FALSE	FALSE	FALSE	FALSE
20200205_TTNGFP_D4_GATA6ChIP_001_peak_1026	chr1	16956574	16957083	510	*	54.6	+	Promoter (<=1kb)	1	16944751	16957604	12854	2	84809	uc001aze.3	521	ENSG00000215908	CROCCP2	CROCC pseudogene 2	FALSE	FALSE	FALSE	FALSE	FALSE	FALSE
20200205_TTNGFP_D4_GATA6ChIP_001_peak_10260	chr16	358002	358222	221	*	18.8	+	Intron (uc021szo.1/55692, intron 1 of 9)	16	332615	337209	4595	1	64714	uc010bqt.1	25387	ENSG00000185615	PDIA2	protein disulfide isomerase family A member 2	FALSE	FALSE	FALSE	FALSE	FALSE	FALSE
20200205_TTNGFP_D4_GATA6ChIP_001_peak_10265	chr16	387727	387900	174	*	18	+	Promoter (2-3kb)	16	238974	385566	146593	2	55692	uc021szo.1	-2161	ENSG00000007392	LUC7L	LUC7 like	FALSE	FALSE	FALSE	FALSE	FALSE	FALSE
20200205_TTNGFP_D4_GATA6ChIP_001_peak_10266	chr16	392672	392827	156	*	17	+	Promoter (7-8kb)	16	238974	385566	146593	2	55692	uc021szo.1	-7106	ENSG00000007392	LUC7L	LUC7 like	FALSE	FALSE	FALSE	FALSE	FALSE	FALSE
20200205_TTNGFP_D4_GATA6ChIP_001_peak_10268	chr16	411406	411623	218	*	15	+	Promoter (8-9kb)	16	337440	402676	65237	2	8312	uc002cgq.2	-8730	ENSG00000103126	AXIN1	axin 1	FALSE	FALSE	FALSE	FALSE	FALSE	FALSE
20200205_TTNGFP_D4_GATA6ChIP_001_peak_10269	chr16	413576	413754	179	*	14.8	+	Distal Intergenic	16	417384	420569	3186	2	10573	uc002cgs.2	6815	ENSG00000086504	MRPL28	mitochondrial ribosomal protein L28	FALSE	FALSE	FALSE	TRUE	FALSE	FALSE
20200205_TTNGFP_D4_GATA6ChIP_001_peak_1027	chr1	16957569	16957982	414	*	48.1	+	Promoter (<=1kb)	1	16944751	16957604	12854	2	84809	uc001aze.3	0	ENSG00000215908	CROCCP2	CROCC pseudogene 2	FALSE	FALSE	FALSE	FALSE	FALSE	FALSE
20200205_TTNGFP_D4_GATA6ChIP_001_peak_10270	chr16	414749	414904	156	*	15.6	+	Downstream (2-3kb)	16	417384	420569	3186	2	10573	uc002cgs.2	5665	ENSG00000086504	MRPL28	mitochondrial ribosomal protein L28	FALSE	FALSE	FALSE	TRUE	FALSE	FALSE
20200205_TTNGFP_D4_GATA6ChIP_001_peak_10272	chr16	423806	424243	438	*	35.4	+	Promoter (3-4kb)	16	417384	420569	3186	2	10573	uc002cgs.2	-3237	ENSG00000086504	MRPL28	mitochondrial ribosomal protein L28	FALSE	FALSE	FALSE	TRUE	FALSE	FALSE
20200205_TTNGFP_D4_GATA6ChIP_001_peak_10273	chr16	426735	426855	121	*	13.9	+	Exon (uc002cgu.4/58986, exon 5 of 13)	16	420776	431950	11175	2	58986	uc002cgu.4	5095	ENSG00000129925	TMEM8A	transmembrane protein 8A	FALSE	FALSE	FALSE	FALSE	FALSE	FALSE
20200205_TTNGFP_D4_GATA6ChIP_001_peak_10275	chr16	429407	429678	272	*	21.8	+	Promoter (2-3kb)	16	420776	431950	11175	2	58986	uc002cgu.4	2272	ENSG00000129925	TMEM8A	transmembrane protein 8A	FALSE	FALSE	FALSE	FALSE	TRUE	TRUE
20200205_TTNGFP_D4_GATA6ChIP_001_peak_10276	chr16	431003	431310	308	*	18.6	+	Promoter (<=1kb)	16	420776	431950	11175	2	58986	uc002cgu.4	640	ENSG00000129925	TMEM8A	transmembrane protein 8A	FALSE	FALSE	FALSE	FALSE	FALSE	FALSE
20200205_TTNGFP_D4_GATA6ChIP_001_peak_10277	chr16	455982	456175	194	*	20.4	+	Promoter (1-2kb)	16	457295	462370	5076	1	26063	uc002che.1	-1120	ENSG00000242612	DECR2	2,4-dienoyl-CoA reductase 2	FALSE	FALSE	FALSE	FALSE	FALSE	FALSE
20200205_TTNGFP_D4_GATA6ChIP_001_peak_1028	chr1	16965721	16966028	308	*	40.7	+	Intron (uc001azg.1/84809, intron 2 of 9)	1	16951873	16971178	19306	2	84809	uc001azg.1	5150	ENSG00000215908	CROCCP2	CROCC pseudogene 2	FALSE	FALSE	FALSE	FALSE	TRUE	TRUE
20200205_TTNGFP_D4_GATA6ChIP_001_peak_10281	chr16	517076	517357	282	*	27.1	+	Promoter (7-8kb)	16	524850	572481	47632	1	9727	uc010uuf.2	-7493	ENSG00000090565	RAB11FIP3	RAB11 family interacting protein 3	FALSE	FALSE	FALSE	FALSE	FALSE	FALSE
20200205_TTNGFP_D4_GATA6ChIP_001_peak_10282	chr16	521189	521535	347	*	20.3	+	Promoter (3-4kb)	16	524850	572481	47632	1	9727	uc010uuf.2	-3315	ENSG00000090565	RAB11FIP3	RAB11 family interacting protein 3	FALSE	FALSE	FALSE	FALSE	FALSE	FALSE
20200205_TTNGFP_D4_GATA6ChIP_001_peak_10285	chr16	539712	539913	202	*	17.7	+	Intron (uc002chf.3/9727, intron 5 of 13)	16	532525	572481	39957	1	9727	uc010uug.2	7187	ENSG00000090565	RAB11FIP3	RAB11 family interacting protein 3	FALSE	FALSE	FALSE	FALSE	FALSE	FALSE
20200205_TTNGFP_D4_GATA6ChIP_001_peak_10288	chr16	560000	560359	360	*	22.1	+	Intron (uc002chf.3/9727, intron 8 of 13)	16	576847	577407	561	2	64493	uc010uuh.1	17048	NA	LINC00235	long intergenic non-protein coding RNA 235	FALSE	FALSE	FALSE	FALSE	FALSE	FALSE
20200205_TTNGFP_D4_GATA6ChIP_001_peak_10289	chr16	569032	569295	264	*	30.6	+	Intron (uc002chf.3/9727, intron 10 of 13)	16	576847	577407	561	2	64493	uc010uuh.1	8112	NA	LINC00235	long intergenic non-protein coding RNA 235	FALSE	FALSE	FALSE	FALSE	FALSE	FALSE
20200205_TTNGFP_D4_GATA6ChIP_001_peak_10290	chr16	580882	580998	117	*	15.7	+	Intron (uc002chg.3/6650, intron 1 of 3)	16	577856	604636	26781	1	6650	uc002chi.3	3026	ENSG00000103326	CAPN15	calpain 15	FALSE	FALSE	FALSE	FALSE	FALSE	FALSE
20200205_TTNGFP_D4_GATA6ChIP_001_peak_10291	chr16	581737	581895	159	*	10.9	+	Promoter (3-4kb)	16	585316	585368	53	1	100847028	uc031qun.1	-3421	ENSG00000266124	MIR5587	microRNA 5587	FALSE	FALSE	FALSE	FALSE	FALSE	FALSE
20200205_TTNGFP_D4_GATA6ChIP_001_peak_10293	chr16	587961	588194	234	*	23.8	+	Promoter (2-3kb)	16	585316	585368	53	1	100847028	uc031qun.1	2645	ENSG00000266124	MIR5587	microRNA 5587	FALSE	FALSE	FALSE	FALSE	FALSE	FALSE
20200205_TTNGFP_D4_GATA6ChIP_001_peak_10294	chr16	592047	592176	130	*	14.5	+	Promoter (1-2kb)	16	593277	593366	90	1	100423037	uc021szr.1	-1101	ENSG00000266235	MIR3176	microRNA 3176	FALSE	FALSE	FALSE	FALSE	FALSE	FALSE
20200205_TTNGFP_D4_GATA6ChIP_001_peak_10295	chr16	593442	593602	161	*	11.8	+	Promoter (<=1kb)	16	593277	593366	90	1	100423037	uc021szr.1	165	ENSG00000266235	MIR3176	microRNA 3176	FALSE	FALSE	FALSE	FALSE	FALSE	FALSE
20200205_TTNGFP_D4_GATA6ChIP_001_peak_10296	chr16	596412	596687	276	*	16	+	Intron (uc002chh.1/6650, intron 2 of 2)	16	593277	593366	90	1	100423037	uc021szr.1	3135	ENSG00000266235	MIR3176	microRNA 3176	TRUE	FALSE	FALSE	FALSE	FALSE	FALSE
20200205_TTNGFP_D4_GATA6ChIP_001_peak_10299	chr16	607583	607753	171	*	11.8	+	Promoter (2-3kb)	16	610422	615529	5108	1	146325	uc002chk.3	-2669	ENSG00000161992	PRR35	proline rich 35	FALSE	FALSE	TRUE	FALSE	FALSE	FALSE
20200205_TTNGFP_D4_GATA6ChIP_001_peak_103	chr1	1404195	1404394	200	*	12.7	+	Promoter (2-3kb)	1	1407164	1431582	24419	1	83858	uc001afv.3	-2770	ENSG00000160072	ATAD3B	ATPase family AAA domain containing 3B	FALSE	FALSE	FALSE	FALSE	FALSE	FALSE
20200205_TTNGFP_D4_GATA6ChIP_001_peak_1030	chr1	16970608	16970853	246	*	47.8	+	Promoter (<=1kb)	1	16951873	16971178	19306	2	84809	uc001azg.1	325	ENSG00000215908	CROCCP2	CROCC pseudogene 2	TRUE	FALSE	FALSE	FALSE	FALSE	FALSE
20200205_TTNGFP_D4_GATA6ChIP_001_peak_10301	chr16	615850	616160	311	*	33.3	+	Promoter (<=1kb)	16	617032	619495	2464	1	283948	uc002chl.3	-872	ENSG00000257108	NHLRC4	NHL repeat containing 4	TRUE	FALSE	FALSE	FALSE	TRUE	TRUE
20200205_TTNGFP_D4_GATA6ChIP_001_peak_10303	chr16	617945	618109	165	*	12.4	+	Promoter (<=1kb)	16	617032	634136	17105	1	9091	uc010bqw.3	913	ENSG00000007541	PIGQ	phosphatidylinositol glycan anchor biosynthesis class Q	FALSE	FALSE	FALSE	FALSE	FALSE	FALSE
20200205_TTNGFP_D4_GATA6ChIP_001_peak_10304	chr16	618229	618398	170	*	19.4	+	Promoter (1-2kb)	16	617032	634136	17105	1	9091	uc010bqw.3	1197	ENSG00000007541	PIGQ	phosphatidylinositol glycan anchor biosynthesis class Q	FALSE	FALSE	FALSE	FALSE	FALSE	FALSE
20200205_TTNGFP_D4_GATA6ChIP_001_peak_10307	chr16	629085	629482	398	*	40.6	+	Promoter (2-3kb)	16	631761	634136	2376	1	9091	uc002chp.3	-2279	ENSG00000007541	PIGQ	phosphatidylinositol glycan anchor biosynthesis class Q	TRUE	FALSE	FALSE	FALSE	TRUE	TRUE
20200205_TTNGFP_D4_GATA6ChIP_001_peak_10309	chr16	633246	633524	279	*	27.5	+	Promoter (1-2kb)	16	631761	634136	2376	1	9091	uc002chp.3	1485	ENSG00000007541	PIGQ	phosphatidylinositol glycan anchor biosynthesis class Q	FALSE	FALSE	FALSE	FALSE	FALSE	FALSE
20200205_TTNGFP_D4_GATA6ChIP_001_peak_10310	chr16	642664	642789	126	*	18.8	+	Promoter (2-3kb)	16	640173	679273	39101	1	57799	uc002chr.3	2491	ENSG00000197562	RAB40C	RAB40C, member RAS oncogene family	FALSE	FALSE	FALSE	FALSE	FALSE	FALSE
20200205_TTNGFP_D4_GATA6ChIP_001_peak_10312	chr16	646340	646513	174	*	17	+	Intron (uc021szt.1/57799, intron 2 of 6)	16	640173	679273	39101	1	57799	uc002chr.3	6167	ENSG00000197562	RAB40C	RAB40C, member RAS oncogene family	FALSE	FALSE	FALSE	FALSE	FALSE	FALSE
20200205_TTNGFP_D4_GATA6ChIP_001_peak_10313	chr16	646825	646947	123	*	10.6	+	Intron (uc021szt.1/57799, intron 2 of 6)	16	640173	679273	39101	1	57799	uc002chr.3	6652	ENSG00000197562	RAB40C	RAB40C, member RAS oncogene family	FALSE	FALSE	FALSE	FALSE	FALSE	FALSE
20200205_TTNGFP_D4_GATA6ChIP_001_peak_10314	chr16	658193	658465	273	*	11.4	+	Intron (uc021szt.1/57799, intron 2 of 6)	16	640173	679273	39101	1	57799	uc002chr.3	18020	ENSG00000197562	RAB40C	RAB40C, member RAS oncogene family	TRUE	FALSE	FALSE	FALSE	TRUE	FALSE
20200205_TTNGFP_D4_GATA6ChIP_001_peak_10315	chr16	669419	669783	365	*	29.5	+	Intron (uc021szt.1/57799, intron 4 of 6)	16	681012	684116	3105	1	117166	uc002cht.1	-11229	ENSG00000127578	WFIKKN1	WAP, follistatin/kazal, immunoglobulin, kunitz and netrin domain containing 1	FALSE	FALSE	FALSE	TRUE	FALSE	FALSE
20200205_TTNGFP_D4_GATA6ChIP_001_peak_10317	chr16	679887	680006	120	*	21.2	+	Promoter (1-2kb)	16	681012	684116	3105	1	117166	uc002cht.1	-1006	ENSG00000127578	WFIKKN1	WAP, follistatin/kazal, immunoglobulin, kunitz and netrin domain containing 1	FALSE	FALSE	FALSE	TRUE	FALSE	TRUE
20200205_TTNGFP_D4_GATA6ChIP_001_peak_10318	chr16	680156	680318	163	*	14.7	+	Promoter (<=1kb)	16	681012	684116	3105	1	117166	uc002cht.1	-694	ENSG00000127578	WFIKKN1	WAP, follistatin/kazal, immunoglobulin, kunitz and netrin domain containing 1	FALSE	FALSE	FALSE	TRUE	FALSE	FALSE
20200205_TTNGFP_D4_GATA6ChIP_001_peak_10319	chr16	682824	683116	293	*	26.2	+	Promoter (1-2kb)	16	681012	684116	3105	1	117166	uc002cht.1	1812	ENSG00000127578	WFIKKN1	WAP, follistatin/kazal, immunoglobulin, kunitz and netrin domain containing 1	FALSE	FALSE	FALSE	TRUE	FALSE	FALSE
20200205_TTNGFP_D4_GATA6ChIP_001_peak_1032	chr1	16971857	16972149	293	*	25.3	+	Promoter (<=1kb)	1	16972069	16974587	2519	1	11209	uc009vow.2	0	NA	MST1P2	macrophage stimulating 1 pseudogene 2	FALSE	FALSE	FALSE	FALSE	FALSE	FALSE
20200205_TTNGFP_D4_GATA6ChIP_001_peak_10320	chr16	683278	683790	513	*	26.3	+	Promoter (2-3kb)	16	681012	684116	3105	1	117166	uc002cht.1	2266	ENSG00000127578	WFIKKN1	WAP, follistatin/kazal, immunoglobulin, kunitz and netrin domain containing 1	FALSE	FALSE	FALSE	TRUE	FALSE	FALSE
20200205_TTNGFP_D4_GATA6ChIP_001_peak_10321	chr16	686806	686985	180	*	17	+	Promoter (<=1kb)	16	684429	686347	1919	2	84326	uc002cib.1	-459	ENSG00000130731	METTL26	methyltransferase like 26	FALSE	FALSE	FALSE	FALSE	TRUE	TRUE
20200205_TTNGFP_D4_GATA6ChIP_001_peak_10322	chr16	688102	688468	367	*	16.8	+	Promoter (1-2kb)	16	684429	686347	1919	2	84326	uc002cib.1	-1755	ENSG00000130731	METTL26	methyltransferase like 26	FALSE	FALSE	FALSE	FALSE	FALSE	FALSE
20200205_TTNGFP_D4_GATA6ChIP_001_peak_10323	chr16	696441	696650	210	*	20.9	+	Promoter (2-3kb)	16	699363	706537	7175	1	197335	uc002cig.1	-2713	ENSG00000161996	WDR90	WD repeat domain 90	FALSE	FALSE	FALSE	FALSE	FALSE	FALSE
20200205_TTNGFP_D4_GATA6ChIP_001_peak_10324	chr16	707372	707629	258	*	19.4	+	Promoter (<=1kb)	16	707762	713438	5677	1	197335	uc002cim.1	-133	ENSG00000161996	WDR90	WD repeat domain 90	FALSE	FALSE	FALSE	FALSE	FALSE	FALSE
20200205_TTNGFP_D4_GATA6ChIP_001_peak_10325	chr16	708693	708964	272	*	25.6	+	Promoter (<=1kb)	16	707762	713438	5677	1	197335	uc002cim.1	931	ENSG00000161996	WDR90	WD repeat domain 90	FALSE	FALSE	FALSE	FALSE	FALSE	FALSE
20200205_TTNGFP_D4_GATA6ChIP_001_peak_10329	chr16	716067	716219	153	*	14.4	+	Promoter (1-2kb)	16	714988	717829	2842	1	197335	uc010bqx.1	1079	ENSG00000161996	WDR90	WD repeat domain 90	FALSE	FALSE	FALSE	FALSE	FALSE	FALSE
20200205_TTNGFP_D4_GATA6ChIP_001_peak_1033	chr1	16973550	16974034	485	*	53.9	+	Promoter (<=1kb)	1	16973908	16976915	3008	1	11209	uc001azm.4	0	NA	MST1P2	macrophage stimulating 1 pseudogene 2	TRUE	FALSE	FALSE	FALSE	TRUE	TRUE
20200205_TTNGFP_D4_GATA6ChIP_001_peak_10330	chr16	716729	716864	136	*	15.4	+	Promoter (1-2kb)	16	718083	724174	6092	1	89941	uc002cip.3	-1219	ENSG00000140983	RHOT2	ras homolog family member T2	FALSE	FALSE	FALSE	FALSE	FALSE	FALSE
20200205_TTNGFP_D4_GATA6ChIP_001_peak_10331	chr16	726193	726374	182	*	18.3	+	Promoter (<=1kb)	16	726075	728267	2193	1	9028	uc002cis.1	118	ENSG00000103269	RHBDL1	rhomboid like 1	FALSE	FALSE	FALSE	FALSE	FALSE	FALSE
20200205_TTNGFP_D4_GATA6ChIP_001_peak_10332	chr16	732348	733028	681	*	38.8	+	Promoter (1-2kb)	16	731667	734439	2773	2	339123	uc002ciw.1	1411	ENSG00000161999	JMJD8	jumonji domain containing 8	TRUE	FALSE	FALSE	FALSE	FALSE	FALSE
20200205_TTNGFP_D4_GATA6ChIP_001_peak_10333	chr16	736675	736837	163	*	10.1	+	Promoter (2-3kb)	16	731667	734439	2773	2	339123	uc002ciy.1	-2236	ENSG00000161999	JMJD8	jumonji domain containing 8	FALSE	FALSE	FALSE	FALSE	FALSE	FALSE
20200205_TTNGFP_D4_GATA6ChIP_001_peak_10337	chr16	754728	754851	124	*	13	+	Promoter (<=1kb)	16	742500	755825	13326	2	146330	uc021taa.1	974	ENSG00000127585	FBXL16	F-box and leucine rich repeat protein 16	FALSE	FALSE	FALSE	FALSE	FALSE	FALSE
20200205_TTNGFP_D4_GATA6ChIP_001_peak_10339	chr16	757903	758159	257	*	15.1	+	Promoter (2-3kb)	16	742500	755825	13326	2	146330	uc021taa.1	-2078	ENSG00000127585	FBXL16	F-box and leucine rich repeat protein 16	FALSE	FALSE	FALSE	FALSE	FALSE	FALSE
20200205_TTNGFP_D4_GATA6ChIP_001_peak_10341	chr16	758940	759144	205	*	17.1	+	Promoter (3-4kb)	16	742500	755825	13326	2	146330	uc021taa.1	-3115	ENSG00000127585	FBXL16	F-box and leucine rich repeat protein 16	FALSE	FALSE	FALSE	FALSE	FALSE	FALSE
20200205_TTNGFP_D4_GATA6ChIP_001_peak_10342	chr16	759368	759628	261	*	21.6	+	Promoter (3-4kb)	16	742500	755825	13326	2	146330	uc021taa.1	-3543	ENSG00000127585	FBXL16	F-box and leucine rich repeat protein 16	FALSE	FALSE	FALSE	FALSE	FALSE	FALSE
20200205_TTNGFP_D4_GATA6ChIP_001_peak_10344	chr16	780210	780651	442	*	38.3	+	Promoter (2-3kb)	16	781565	782746	1182	2	64428	uc010uuq.1	2095	ENSG00000103245	CIAO3	cytosolic iron-sulfur assembly component 3	FALSE	FALSE	FALSE	FALSE	FALSE	FALSE
20200205_TTNGFP_D4_GATA6ChIP_001_peak_10347	chr16	797659	797945	287	*	28.2	+	Promoter (6-7kb)	16	783841	790997	7157	2	64428	uc010uur.1	-6662	ENSG00000103245	CIAO3	cytosolic iron-sulfur assembly component 3	FALSE	FALSE	FALSE	FALSE	FALSE	FALSE
20200205_TTNGFP_D4_GATA6ChIP_001_peak_10348	chr16	800771	801029	259	*	30.3	+	Promoter (9-10kb)	16	810765	818865	8101	1	10232	uc002cjt.1	-9736	ENSG00000102854	MSLN	mesothelin	FALSE	FALSE	FALSE	FALSE	FALSE	FALSE
20200205_TTNGFP_D4_GATA6ChIP_001_peak_10351	chr16	830165	830398	234	*	20.7	+	Distal Intergenic	16	834974	837971	2998	2	113000	uc002cka.3	7573	ENSG00000007376	RPUSD1	RNA pseudouridine synthase domain containing 1	FALSE	FALSE	FALSE	FALSE	FALSE	FALSE
20200205_TTNGFP_D4_GATA6ChIP_001_peak_10352	chr16	830561	831095	535	*	41.8	+	Distal Intergenic	16	834974	837971	2998	2	113000	uc002cka.3	6876	ENSG00000007376	RPUSD1	RNA pseudouridine synthase domain containing 1	FALSE	FALSE	FALSE	FALSE	FALSE	FALSE
20200205_TTNGFP_D4_GATA6ChIP_001_peak_10353	chr16	833531	833647	117	*	11.4	+	Downstream (1-2kb)	16	834974	837971	2998	2	113000	uc002cka.3	4324	ENSG00000007376	RPUSD1	RNA pseudouridine synthase domain containing 1	FALSE	FALSE	FALSE	FALSE	FALSE	FALSE
20200205_TTNGFP_D4_GATA6ChIP_001_peak_10356	chr16	846548	846709	162	*	17.3	+	Intron (uc002cke.4/63922, intron 18 of 21)	16	848041	850733	2693	2	51764	uc002ckh.4	4024	ENSG00000127588	GNG13	G protein subunit gamma 13	FALSE	FALSE	FALSE	FALSE	FALSE	FALSE
20200205_TTNGFP_D4_GATA6ChIP_001_peak_10357	chr16	851135	851252	118	*	19.2	+	Promoter (<=1kb)	16	848041	850733	2693	2	51764	uc002ckh.4	-402	ENSG00000127588	GNG13	G protein subunit gamma 13	FALSE	FALSE	FALSE	FALSE	FALSE	FALSE
20200205_TTNGFP_D4_GATA6ChIP_001_peak_10359	chr16	852219	852661	443	*	35.9	+	Promoter (1-2kb)	16	848041	850733	2693	2	51764	uc002ckh.4	-1486	ENSG00000127588	GNG13	G protein subunit gamma 13	FALSE	FALSE	FALSE	FALSE	FALSE	FALSE
20200205_TTNGFP_D4_GATA6ChIP_001_peak_1036	chr1	17019347	17019778	432	*	34.4	+	Intron (uc001azn.1/284729, intron 10 of 10)	1	17007750	17007823	74	1	100500876	uc021ogy.1	11597	ENSG00000263811	MIR3675	microRNA 3675	FALSE	FALSE	FALSE	FALSE	FALSE	FALSE
20200205_TTNGFP_D4_GATA6ChIP_001_peak_10360	chr16	869584	869844	261	*	26.8	+	Distal Intergenic	16	855443	863861	8419	1	388199	uc010uut.2	14141	NA	PRR25	proline rich 25	FALSE	FALSE	FALSE	FALSE	FALSE	FALSE
20200205_TTNGFP_D4_GATA6ChIP_001_peak_10362	chr16	879059	879310	252	*	18.9	+	Distal Intergenic	16	855443	863861	8419	1	388199	uc010uut.2	23616	NA	PRR25	proline rich 25	FALSE	FALSE	FALSE	FALSE	FALSE	FALSE
20200205_TTNGFP_D4_GATA6ChIP_001_peak_10363	chr16	888830	889053	224	*	21.9	+	Distal Intergenic	16	903635	919056	15422	2	64788	uc010brg.2	30003	ENSG00000103227	LMF1	lipase maturation factor 1	FALSE	FALSE	FALSE	FALSE	FALSE	FALSE
20200205_TTNGFP_D4_GATA6ChIP_001_peak_10364	chr16	889421	889568	148	*	19.8	+	Distal Intergenic	16	903635	919056	15422	2	64788	uc010brg.2	29488	ENSG00000103227	LMF1	lipase maturation factor 1	FALSE	FALSE	FALSE	FALSE	FALSE	FALSE
20200205_TTNGFP_D4_GATA6ChIP_001_peak_10366	chr16	897828	898034	207	*	18.9	+	Distal Intergenic	16	903635	919056	15422	2	64788	uc010brg.2	21022	ENSG00000103227	LMF1	lipase maturation factor 1	FALSE	FALSE	FALSE	FALSE	FALSE	FALSE
20200205_TTNGFP_D4_GATA6ChIP_001_peak_10368	chr16	900640	900864	225	*	19.8	+	Downstream (2-3kb)	16	903635	919056	15422	2	64788	uc010brg.2	18192	ENSG00000103227	LMF1	lipase maturation factor 1	FALSE	FALSE	FALSE	FALSE	FALSE	FALSE
20200205_TTNGFP_D4_GATA6ChIP_001_peak_1037	chr1	17023203	17023455	253	*	22.6	+	Exon (uc001azn.1/284729, exon 9 of 11)	1	17007750	17007823	74	1	100500876	uc021ogy.1	15453	ENSG00000263811	MIR3675	microRNA 3675	FALSE	FALSE	FALSE	FALSE	FALSE	FALSE
20200205_TTNGFP_D4_GATA6ChIP_001_peak_10371	chr16	905727	905869	143	*	12.7	+	Exon (uc010brg.2/64788, exon 2 of 3)	16	903635	919056	15422	2	64788	uc010brg.2	13187	ENSG00000103227	LMF1	lipase maturation factor 1	FALSE	FALSE	FALSE	FALSE	FALSE	FALSE
20200205_TTNGFP_D4_GATA6ChIP_001_peak_10372	chr16	908961	909249	289	*	25.1	+	Intron (uc010brg.2/64788, intron 1 of 2)	16	903635	919056	15422	2	64788	uc010brg.2	9807	ENSG00000103227	LMF1	lipase maturation factor 1	FALSE	FALSE	FALSE	FALSE	FALSE	FALSE
20200205_TTNGFP_D4_GATA6ChIP_001_peak_10373	chr16	920669	920831	163	*	17.7	+	Promoter (1-2kb)	16	903635	919056	15422	2	64788	uc010brg.2	-1613	ENSG00000103227	LMF1	lipase maturation factor 1	FALSE	FALSE	FALSE	FALSE	FALSE	FALSE
20200205_TTNGFP_D4_GATA6ChIP_001_peak_10374	chr16	921518	921663	146	*	17.7	+	Promoter (2-3kb)	16	903635	919056	15422	2	64788	uc010brg.2	-2462	ENSG00000103227	LMF1	lipase maturation factor 1	FALSE	FALSE	FALSE	FALSE	FALSE	FALSE
20200205_TTNGFP_D4_GATA6ChIP_001_peak_10375	chr16	929242	929473	232	*	19.7	+	Intron (uc010bri.2/64788, intron 3 of 7)	16	903635	919056	15422	2	64788	uc010brg.2	-10186	ENSG00000103227	LMF1	lipase maturation factor 1	FALSE	FALSE	FALSE	FALSE	FALSE	FALSE
20200205_TTNGFP_D4_GATA6ChIP_001_peak_10376	chr16	930534	930672	139	*	15.1	+	Intron (uc010bri.2/64788, intron 2 of 7)	16	903635	919056	15422	2	64788	uc010brg.2	-11478	ENSG00000103227	LMF1	lipase maturation factor 1	FALSE	FALSE	FALSE	FALSE	FALSE	FALSE
20200205_TTNGFP_D4_GATA6ChIP_001_peak_10378	chr16	939616	939843	228	*	20.1	+	Intron (uc010bri.2/64788, intron 2 of 7)	16	903635	919056	15422	2	64788	uc010brg.2	-20560	ENSG00000103227	LMF1	lipase maturation factor 1	TRUE	FALSE	FALSE	FALSE	FALSE	FALSE
20200205_TTNGFP_D4_GATA6ChIP_001_peak_10379	chr16	940560	940983	424	*	30.6	+	Intron (uc010bri.2/64788, intron 2 of 7)	16	903635	919056	15422	2	64788	uc010brg.2	-21504	ENSG00000103227	LMF1	lipase maturation factor 1	TRUE	FALSE	FALSE	FALSE	FALSE	TRUE
20200205_TTNGFP_D4_GATA6ChIP_001_peak_1038	chr1	17023637	17024164	528	*	55.6	+	Intron (uc001azn.1/284729, intron 8 of 10)	1	17007750	17007823	74	1	100500876	uc021ogy.1	15887	ENSG00000263811	MIR3675	microRNA 3675	FALSE	FALSE	FALSE	FALSE	FALSE	FALSE
20200205_TTNGFP_D4_GATA6ChIP_001_peak_10380	chr16	941511	941772	262	*	18.2	+	Intron (uc010bri.2/64788, intron 2 of 7)	16	903635	919056	15422	2	64788	uc010brg.2	-22455	ENSG00000103227	LMF1	lipase maturation factor 1	FALSE	FALSE	FALSE	FALSE	FALSE	FALSE
20200205_TTNGFP_D4_GATA6ChIP_001_peak_10382	chr16	958700	958966	267	*	23	+	Intron (uc010bri.2/64788, intron 1 of 7)	16	903635	919056	15422	2	64788	uc010brg.2	-39644	ENSG00000103227	LMF1	lipase maturation factor 1	FALSE	FALSE	FALSE	FALSE	FALSE	FALSE
20200205_TTNGFP_D4_GATA6ChIP_001_peak_10385	chr16	994701	994829	129	*	8	+	Intron (uc010bri.2/64788, intron 1 of 7)	16	903635	1020984	117350	2	64788	uc010bri.2	26155	ENSG00000103227	LMF1	lipase maturation factor 1	FALSE	FALSE	FALSE	FALSE	FALSE	FALSE
20200205_TTNGFP_D4_GATA6ChIP_001_peak_10387	chr16	1017033	1017273	241	*	18	+	Intron (uc010bri.2/64788, intron 1 of 7)	16	903635	1020984	117350	2	64788	uc010bri.2	3711	ENSG00000103227	LMF1	lipase maturation factor 1	FALSE	FALSE	FALSE	FALSE	FALSE	FALSE
20200205_TTNGFP_D4_GATA6ChIP_001_peak_10388	chr16	1017785	1018046	262	*	32.4	+	Promoter (2-3kb)	16	903635	1020984	117350	2	64788	uc010bri.2	2938	ENSG00000103227	LMF1	lipase maturation factor 1	FALSE	FALSE	FALSE	FALSE	FALSE	FALSE
20200205_TTNGFP_D4_GATA6ChIP_001_peak_10389	chr16	1027299	1027500	202	*	15.7	+	Intron (uc002ckk.2/64788, intron 1 of 11)	16	1025761	1030913	5153	2	64788	uc002ckm.1	3413	ENSG00000103227	LMF1	lipase maturation factor 1	FALSE	FALSE	FALSE	FALSE	FALSE	FALSE
20200205_TTNGFP_D4_GATA6ChIP_001_peak_10390	chr16	1031143	1031342	200	*	8.8	+	Promoter (<=1kb)	16	903635	1031318	127684	2	64788	uc002ckk.2	0	ENSG00000103227	LMF1	lipase maturation factor 1	FALSE	FALSE	FALSE	FALSE	FALSE	FALSE
20200205_TTNGFP_D4_GATA6ChIP_001_peak_10392	chr16	1048917	1049200	284	*	13	+	Distal Intergenic	16	1031808	1036979	5172	1	30812	uc002ckn.3	17109	ENSG00000005513	SOX8	SRY-box 8	FALSE	FALSE	FALSE	FALSE	FALSE	FALSE
20200205_TTNGFP_D4_GATA6ChIP_001_peak_10393	chr16	1050992	1051183	192	*	18.2	+	Distal Intergenic	16	1031808	1036979	5172	1	30812	uc002ckn.3	19184	ENSG00000005513	SOX8	SRY-box 8	FALSE	FALSE	FALSE	FALSE	FALSE	FALSE
20200205_TTNGFP_D4_GATA6ChIP_001_peak_10394	chr16	1057283	1057411	129	*	9.1	+	Distal Intergenic	16	1031808	1036979	5172	1	30812	uc002ckn.3	25475	ENSG00000005513	SOX8	SRY-box 8	FALSE	FALSE	FALSE	FALSE	FALSE	FALSE
20200205_TTNGFP_D4_GATA6ChIP_001_peak_10395	chr16	1058515	1058700	186	*	22.9	+	Distal Intergenic	16	1031808	1036979	5172	1	30812	uc002ckn.3	26707	ENSG00000005513	SOX8	SRY-box 8	FALSE	FALSE	FALSE	FALSE	FALSE	FALSE
20200205_TTNGFP_D4_GATA6ChIP_001_peak_10396	chr16	1058834	1058991	158	*	12.1	+	Distal Intergenic	16	1031808	1036979	5172	1	30812	uc002ckn.3	27026	ENSG00000005513	SOX8	SRY-box 8	FALSE	FALSE	FALSE	FALSE	FALSE	FALSE
20200205_TTNGFP_D4_GATA6ChIP_001_peak_10397	chr16	1061068	1061266	199	*	26	+	Distal Intergenic	16	1031808	1036979	5172	1	30812	uc002ckn.3	29260	ENSG00000005513	SOX8	SRY-box 8	FALSE	FALSE	FALSE	FALSE	FALSE	FALSE
20200205_TTNGFP_D4_GATA6ChIP_001_peak_10398	chr16	1063143	1063551	409	*	45.7	+	Distal Intergenic	16	1031808	1036979	5172	1	30812	uc002ckn.3	31335	ENSG00000005513	SOX8	SRY-box 8	FALSE	FALSE	FALSE	FALSE	FALSE	FALSE
20200205_TTNGFP_D4_GATA6ChIP_001_peak_10399	chr16	1070873	1071068	196	*	28.5	+	Distal Intergenic	16	1031808	1036979	5172	1	30812	uc002ckn.3	39065	ENSG00000005513	SOX8	SRY-box 8	TRUE	FALSE	FALSE	FALSE	FALSE	FALSE
20200205_TTNGFP_D4_GATA6ChIP_001_peak_10400	chr16	1075287	1075723	437	*	90.5	+	Distal Intergenic	16	1031808	1036979	5172	1	30812	uc002ckn.3	43479	ENSG00000005513	SOX8	SRY-box 8	FALSE	FALSE	FALSE	FALSE	TRUE	FALSE
20200205_TTNGFP_D4_GATA6ChIP_001_peak_10402	chr16	1099405	1099653	249	*	26	+	Distal Intergenic	16	1122756	1131454	8699	1	6755	uc021taf.1	-23103	ENSG00000162009	SSTR5	somatostatin receptor 5	FALSE	FALSE	FALSE	FALSE	FALSE	FALSE
20200205_TTNGFP_D4_GATA6ChIP_001_peak_10409	chr16	1128853	1129023	171	*	14.1	+	Promoter (<=1kb)	16	1128781	1131454	2674	1	6755	uc002ckq.3	72	ENSG00000162009	SSTR5	somatostatin receptor 5	FALSE	FALSE	FALSE	FALSE	FALSE	FALSE
20200205_TTNGFP_D4_GATA6ChIP_001_peak_1041	chr1	17028358	17028577	220	*	28	+	Intron (uc001azn.1/284729, intron 6 of 10)	1	17017713	17046652	28940	2	284729	uc001azn.1	18075	ENSG00000268869	ESPNP	espin pseudogene	FALSE	FALSE	FALSE	FALSE	FALSE	FALSE
20200205_TTNGFP_D4_GATA6ChIP_001_peak_10413	chr16	1145117	1145382	266	*	21.5	+	Promoter (<=1kb)	16	1138226	1146244	8019	2	390664	uc010uuw.1	862	ENSG00000184471	C1QTNF8	C1q and TNF related 8	FALSE	FALSE	FALSE	FALSE	FALSE	FALSE
20200205_TTNGFP_D4_GATA6ChIP_001_peak_10414	chr16	1145647	1145779	133	*	11.4	+	Promoter (<=1kb)	16	1138226	1146244	8019	2	390664	uc010uuw.1	465	ENSG00000184471	C1QTNF8	C1q and TNF related 8	FALSE	FALSE	FALSE	FALSE	FALSE	FALSE
20200205_TTNGFP_D4_GATA6ChIP_001_peak_10415	chr16	1146682	1146888	207	*	17.3	+	Promoter (<=1kb)	16	1138226	1146244	8019	2	390664	uc010uuw.1	-438	ENSG00000184471	C1QTNF8	C1q and TNF related 8	FALSE	FALSE	FALSE	FALSE	FALSE	FALSE
20200205_TTNGFP_D4_GATA6ChIP_001_peak_10417	chr16	1155467	1155618	152	*	12.4	+	Promoter (9-10kb)	16	1138226	1146244	8019	2	390664	uc010uuw.1	-9223	ENSG00000184471	C1QTNF8	C1q and TNF related 8	FALSE	FALSE	FALSE	FALSE	FALSE	FALSE
20200205_TTNGFP_D4_GATA6ChIP_001_peak_10418	chr16	1157734	1157897	164	*	17.7	+	Distal Intergenic	16	1138226	1146244	8019	2	390664	uc010uuw.1	-11490	ENSG00000184471	C1QTNF8	C1q and TNF related 8	FALSE	FALSE	FALSE	FALSE	FALSE	FALSE
20200205_TTNGFP_D4_GATA6ChIP_001_peak_1042	chr1	17030503	17031265	763	*	66.9	+	Exon (uc001azn.1/284729, exon 5 of 11)	1	17017713	17046652	28940	2	284729	uc001azn.1	15387	ENSG00000268869	ESPNP	espin pseudogene	TRUE	FALSE	FALSE	FALSE	FALSE	FALSE
20200205_TTNGFP_D4_GATA6ChIP_001_peak_10420	chr16	1159425	1159606	182	*	14.2	+	Distal Intergenic	16	1138226	1146244	8019	2	390664	uc010uuw.1	-13181	ENSG00000184471	C1QTNF8	C1q and TNF related 8	FALSE	FALSE	FALSE	FALSE	FALSE	FALSE
20200205_TTNGFP_D4_GATA6ChIP_001_peak_10421	chr16	1161928	1162050	123	*	18.2	+	Distal Intergenic	16	1138226	1146244	8019	2	390664	uc010uuw.1	-15684	ENSG00000184471	C1QTNF8	C1q and TNF related 8	FALSE	FALSE	FALSE	FALSE	FALSE	FALSE
20200205_TTNGFP_D4_GATA6ChIP_001_peak_10423	chr16	1164819	1165272	454	*	31.2	+	Distal Intergenic	16	1138226	1146244	8019	2	390664	uc010uuw.1	-18575	ENSG00000184471	C1QTNF8	C1q and TNF related 8	FALSE	FALSE	FALSE	FALSE	FALSE	FALSE
20200205_TTNGFP_D4_GATA6ChIP_001_peak_10425	chr16	1168810	1169096	287	*	22.4	+	Distal Intergenic	16	1138226	1146244	8019	2	390664	uc010uuw.1	-22566	ENSG00000184471	C1QTNF8	C1q and TNF related 8	FALSE	FALSE	FALSE	FALSE	FALSE	FALSE
20200205_TTNGFP_D4_GATA6ChIP_001_peak_10428	chr16	1180106	1180521	416	*	28.2	+	Distal Intergenic	16	1203241	1271772	68532	1	8912	uc002cks.3	-22720	ENSG00000196557	CACNA1H	calcium voltage-gated channel subunit alpha1 H	FALSE	FALSE	FALSE	FALSE	FALSE	FALSE
20200205_TTNGFP_D4_GATA6ChIP_001_peak_10429	chr16	1181711	1181855	145	*	11.5	+	Distal Intergenic	16	1203241	1271772	68532	1	8912	uc002cks.3	-21386	ENSG00000196557	CACNA1H	calcium voltage-gated channel subunit alpha1 H	FALSE	FALSE	FALSE	FALSE	FALSE	FALSE
20200205_TTNGFP_D4_GATA6ChIP_001_peak_1043	chr1	17031644	17031779	136	*	28.2	+	Intron (uc001azn.1/284729, intron 4 of 10)	1	17017713	17046652	28940	2	284729	uc001azn.1	14873	ENSG00000268869	ESPNP	espin pseudogene	TRUE	FALSE	FALSE	FALSE	FALSE	FALSE
20200205_TTNGFP_D4_GATA6ChIP_001_peak_10432	chr16	1183847	1183978	132	*	13.9	+	Distal Intergenic	16	1203241	1271772	68532	1	8912	uc002cks.3	-19263	ENSG00000196557	CACNA1H	calcium voltage-gated channel subunit alpha1 H	FALSE	FALSE	FALSE	FALSE	FALSE	FALSE
20200205_TTNGFP_D4_GATA6ChIP_001_peak_10434	chr16	1193871	1194129	259	*	17.1	+	Promoter (9-10kb)	16	1203241	1271772	68532	1	8912	uc002cks.3	-9112	ENSG00000196557	CACNA1H	calcium voltage-gated channel subunit alpha1 H	FALSE	FALSE	FALSE	FALSE	FALSE	FALSE
20200205_TTNGFP_D4_GATA6ChIP_001_peak_10435	chr16	1194302	1194596	295	*	22.4	+	Promoter (8-9kb)	16	1203241	1271772	68532	1	8912	uc002cks.3	-8645	ENSG00000196557	CACNA1H	calcium voltage-gated channel subunit alpha1 H	FALSE	FALSE	FALSE	FALSE	FALSE	FALSE
20200205_TTNGFP_D4_GATA6ChIP_001_peak_10437	chr16	1200723	1200879	157	*	15.9	+	Promoter (2-3kb)	16	1203241	1271772	68532	1	8912	uc002cks.3	-2362	ENSG00000196557	CACNA1H	calcium voltage-gated channel subunit alpha1 H	FALSE	FALSE	FALSE	FALSE	FALSE	FALSE
20200205_TTNGFP_D4_GATA6ChIP_001_peak_10439	chr16	1210527	1210694	168	*	19.5	+	Intron (uc002cks.3/8912, intron 2 of 34)	16	1203241	1271772	68532	1	8912	uc002ckt.3	7286	ENSG00000196557	CACNA1H	calcium voltage-gated channel subunit alpha1 H	FALSE	FALSE	FALSE	FALSE	FALSE	FALSE
20200205_TTNGFP_D4_GATA6ChIP_001_peak_1044	chr1	17032883	17033004	122	*	20.3	+	Intron (uc001azn.1/284729, intron 4 of 10)	1	17017713	17046652	28940	2	284729	uc001azn.1	13648	ENSG00000268869	ESPNP	espin pseudogene	FALSE	FALSE	FALSE	FALSE	FALSE	FALSE
20200205_TTNGFP_D4_GATA6ChIP_001_peak_10440	chr16	1211164	1211350	187	*	15.3	+	Intron (uc002cks.3/8912, intron 2 of 34)	16	1203241	1271772	68532	1	8912	uc002ckt.3	7923	ENSG00000196557	CACNA1H	calcium voltage-gated channel subunit alpha1 H	FALSE	FALSE	FALSE	FALSE	FALSE	FALSE
20200205_TTNGFP_D4_GATA6ChIP_001_peak_10442	chr16	1212345	1212584	240	*	21.6	+	Intron (uc002cks.3/8912, intron 2 of 34)	16	1203241	1271772	68532	1	8912	uc002ckt.3	9104	ENSG00000196557	CACNA1H	calcium voltage-gated channel subunit alpha1 H	FALSE	FALSE	FALSE	FALSE	FALSE	FALSE
20200205_TTNGFP_D4_GATA6ChIP_001_peak_10444	chr16	1215863	1216035	173	*	21	+	Intron (uc002cks.3/8912, intron 2 of 34)	16	1203241	1271772	68532	1	8912	uc002ckt.3	12622	ENSG00000196557	CACNA1H	calcium voltage-gated channel subunit alpha1 H	FALSE	FALSE	FALSE	FALSE	FALSE	FALSE
20200205_TTNGFP_D4_GATA6ChIP_001_peak_10445	chr16	1216308	1216684	377	*	28.5	+	Intron (uc002cks.3/8912, intron 2 of 34)	16	1203241	1271772	68532	1	8912	uc002ckt.3	13067	ENSG00000196557	CACNA1H	calcium voltage-gated channel subunit alpha1 H	FALSE	FALSE	FALSE	FALSE	FALSE	FALSE
20200205_TTNGFP_D4_GATA6ChIP_001_peak_10446	chr16	1218795	1219071	277	*	32.4	+	Intron (uc002cks.3/8912, intron 2 of 34)	16	1203241	1271772	68532	1	8912	uc002ckt.3	15554	ENSG00000196557	CACNA1H	calcium voltage-gated channel subunit alpha1 H	FALSE	FALSE	FALSE	FALSE	FALSE	FALSE
20200205_TTNGFP_D4_GATA6ChIP_001_peak_10447	chr16	1219882	1220239	358	*	30.7	+	Intron (uc002cks.3/8912, intron 2 of 34)	16	1203241	1271772	68532	1	8912	uc002ckt.3	16641	ENSG00000196557	CACNA1H	calcium voltage-gated channel subunit alpha1 H	FALSE	FALSE	FALSE	FALSE	FALSE	FALSE
20200205_TTNGFP_D4_GATA6ChIP_001_peak_10448	chr16	1220746	1221072	327	*	23	+	Intron (uc002cks.3/8912, intron 2 of 34)	16	1203241	1271772	68532	1	8912	uc002ckt.3	17505	ENSG00000196557	CACNA1H	calcium voltage-gated channel subunit alpha1 H	FALSE	FALSE	FALSE	FALSE	FALSE	FALSE
20200205_TTNGFP_D4_GATA6ChIP_001_peak_10449	chr16	1222240	1222490	251	*	19.7	+	Intron (uc002cks.3/8912, intron 2 of 34)	16	1203241	1271772	68532	1	8912	uc002ckt.3	18999	ENSG00000196557	CACNA1H	calcium voltage-gated channel subunit alpha1 H	FALSE	FALSE	FALSE	FALSE	FALSE	FALSE
20200205_TTNGFP_D4_GATA6ChIP_001_peak_1045	chr1	17037161	17037393	233	*	34.4	+	Intron (uc001azn.1/284729, intron 1 of 10)	1	17017713	17046652	28940	2	284729	uc001azn.1	9259	ENSG00000268869	ESPNP	espin pseudogene	FALSE	FALSE	FALSE	FALSE	FALSE	FALSE
20200205_TTNGFP_D4_GATA6ChIP_001_peak_10452	chr16	1232311	1232501	191	*	16.8	+	Intron (uc002cks.3/8912, intron 2 of 34)	16	1260035	1271772	11738	1	8912	uc002cku.3	-27534	ENSG00000196557	CACNA1H	calcium voltage-gated channel subunit alpha1 H	FALSE	FALSE	FALSE	FALSE	FALSE	TRUE
20200205_TTNGFP_D4_GATA6ChIP_001_peak_10453	chr16	1234760	1234880	121	*	12.6	+	Intron (uc002cks.3/8912, intron 2 of 34)	16	1260035	1271772	11738	1	8912	uc002cku.3	-25155	ENSG00000196557	CACNA1H	calcium voltage-gated channel subunit alpha1 H	FALSE	FALSE	FALSE	FALSE	FALSE	FALSE
20200205_TTNGFP_D4_GATA6ChIP_001_peak_10459	chr16	1246622	1246919	298	*	20.7	+	Intron (uc002cks.3/8912, intron 5 of 34)	16	1260035	1271772	11738	1	8912	uc002cku.3	-13116	ENSG00000196557	CACNA1H	calcium voltage-gated channel subunit alpha1 H	FALSE	FALSE	FALSE	FALSE	FALSE	FALSE
20200205_TTNGFP_D4_GATA6ChIP_001_peak_1046	chr1	17038815	17038963	149	*	27.5	+	Intron (uc001azn.1/284729, intron 1 of 10)	1	17017713	17046652	28940	2	284729	uc001azn.1	7689	ENSG00000268869	ESPNP	espin pseudogene	FALSE	FALSE	FALSE	FALSE	FALSE	FALSE
20200205_TTNGFP_D4_GATA6ChIP_001_peak_10460	chr16	1249892	1250039	148	*	15.1	+	Promoter (9-10kb)	16	1260035	1271772	11738	1	8912	uc002cku.3	-9996	ENSG00000196557	CACNA1H	calcium voltage-gated channel subunit alpha1 H	FALSE	FALSE	FALSE	FALSE	FALSE	FALSE
20200205_TTNGFP_D4_GATA6ChIP_001_peak_10462	chr16	1251387	1251566	180	*	20.7	+	Promoter (8-9kb)	16	1260035	1271772	11738	1	8912	uc002cku.3	-8469	ENSG00000196557	CACNA1H	calcium voltage-gated channel subunit alpha1 H	FALSE	FALSE	FALSE	FALSE	FALSE	FALSE
20200205_TTNGFP_D4_GATA6ChIP_001_peak_10463	chr16	1256555	1256812	258	*	22.3	+	Promoter (3-4kb)	16	1260035	1271772	11738	1	8912	uc002cku.3	-3223	ENSG00000196557	CACNA1H	calcium voltage-gated channel subunit alpha1 H	FALSE	FALSE	FALSE	FALSE	FALSE	FALSE
20200205_TTNGFP_D4_GATA6ChIP_001_peak_10464	chr16	1257091	1257238	148	*	11.8	+	Promoter (2-3kb)	16	1260035	1271772	11738	1	8912	uc002cku.3	-2797	ENSG00000196557	CACNA1H	calcium voltage-gated channel subunit alpha1 H	FALSE	FALSE	FALSE	FALSE	FALSE	FALSE
20200205_TTNGFP_D4_GATA6ChIP_001_peak_10468	chr16	1265522	1265906	385	*	21.9	+	Exon (uc002cks.3/8912, exon 30 of 35)	16	1260035	1271772	11738	1	8912	uc010brj.3	5487	ENSG00000196557	CACNA1H	calcium voltage-gated channel subunit alpha1 H	FALSE	FALSE	FALSE	FALSE	FALSE	FALSE
20200205_TTNGFP_D4_GATA6ChIP_001_peak_10470	chr16	1267574	1267918	345	*	30.4	+	Intron (uc002cks.3/8912, intron 31 of 34)	16	1271651	1275254	3604	2	25823	uc002ckw.2	7336	ENSG00000116176	TPSG1	tryptase gamma 1	FALSE	FALSE	FALSE	FALSE	FALSE	FALSE
20200205_TTNGFP_D4_GATA6ChIP_001_peak_10472	chr16	1269626	1270041	416	*	29.5	+	Exon (uc002cks.3/8912, exon 35 of 35)	16	1271651	1275254	3604	2	25823	uc002ckw.2	5213	ENSG00000116176	TPSG1	tryptase gamma 1	FALSE	FALSE	FALSE	FALSE	FALSE	FALSE
20200205_TTNGFP_D4_GATA6ChIP_001_peak_10473	chr16	1273079	1273459	381	*	25.1	+	Promoter (1-2kb)	16	1271651	1275254	3604	2	25823	uc002ckw.2	1795	ENSG00000116176	TPSG1	tryptase gamma 1	FALSE	FALSE	FALSE	FALSE	FALSE	FALSE
20200205_TTNGFP_D4_GATA6ChIP_001_peak_10475	chr16	1306528	1306942	415	*	37.2	+	Promoter (<=1kb)	16	1306517	1308223	1707	1	23430	uc010brm.1	11	ENSG00000095917	TPSD1	tryptase delta 1	FALSE	FALSE	FALSE	FALSE	FALSE	FALSE
20200205_TTNGFP_D4_GATA6ChIP_001_peak_10476	chr16	1307068	1307227	160	*	10.1	+	Promoter (<=1kb)	16	1306517	1308223	1707	1	23430	uc010brm.1	551	ENSG00000095917	TPSD1	tryptase delta 1	FALSE	FALSE	FALSE	FALSE	FALSE	FALSE
20200205_TTNGFP_D4_GATA6ChIP_001_peak_10479	chr16	1316702	1317042	341	*	22.4	+	Distal Intergenic	16	1306517	1308223	1707	1	23430	uc010brm.1	10185	ENSG00000095917	TPSD1	tryptase delta 1	TRUE	FALSE	FALSE	FALSE	FALSE	FALSE
20200205_TTNGFP_D4_GATA6ChIP_001_peak_10481	chr16	1326123	1326329	207	*	15.1	+	Distal Intergenic	16	1306517	1308223	1707	1	23430	uc010brm.1	19606	ENSG00000095917	TPSD1	tryptase delta 1	FALSE	FALSE	FALSE	FALSE	FALSE	FALSE
20200205_TTNGFP_D4_GATA6ChIP_001_peak_10482	chr16	1327360	1327866	507	*	35.1	+	Distal Intergenic	16	1306517	1308223	1707	1	23430	uc010brm.1	20843	ENSG00000095917	TPSD1	tryptase delta 1	FALSE	FALSE	FALSE	FALSE	FALSE	FALSE
20200205_TTNGFP_D4_GATA6ChIP_001_peak_10484	chr16	1340315	1340482	168	*	15.7	+	Distal Intergenic	16	1359154	1377019	17866	1	7329	uc002clc.2	-18672	ENSG00000103275	UBE2I	ubiquitin conjugating enzyme E2 I	FALSE	FALSE	FALSE	FALSE	FALSE	FALSE
20200205_TTNGFP_D4_GATA6ChIP_001_peak_10485	chr16	1356093	1356213	121	*	10.9	+	Promoter (2-3kb)	16	1359154	1377019	17866	1	7329	uc002clc.2	-2941	ENSG00000103275	UBE2I	ubiquitin conjugating enzyme E2 I	FALSE	FALSE	FALSE	FALSE	FALSE	FALSE
20200205_TTNGFP_D4_GATA6ChIP_001_peak_10486	chr16	1363547	1363772	226	*	17.4	+	Promoter (<=1kb)	16	1363996	1371422	7427	1	7329	uc002clh.1	-224	ENSG00000103275	UBE2I	ubiquitin conjugating enzyme E2 I	FALSE	FALSE	FALSE	FALSE	FALSE	FALSE
20200205_TTNGFP_D4_GATA6ChIP_001_peak_10487	chr16	1364132	1364268	137	*	19.2	+	Promoter (<=1kb)	16	1364021	1371422	7402	1	7329	uc002cli.1	111	ENSG00000103275	UBE2I	ubiquitin conjugating enzyme E2 I	FALSE	FALSE	FALSE	FALSE	FALSE	FALSE
20200205_TTNGFP_D4_GATA6ChIP_001_peak_10488	chr16	1369043	1369425	383	*	25.6	+	Intron (uc002clc.2/7329, intron 4 of 6)	16	1364021	1371422	7402	1	7329	uc002cli.1	5022	ENSG00000103275	UBE2I	ubiquitin conjugating enzyme E2 I	FALSE	FALSE	FALSE	FALSE	FALSE	FALSE
20200205_TTNGFP_D4_GATA6ChIP_001_peak_10491	chr16	1391839	1391958	120	*	13.8	+	Exon (uc002clj.3/8938, exon 9 of 34)	16	1386198	1399442	13245	1	8938	uc010uvc.1	5641	ENSG00000007516	BAIAP3	BAI1 associated protein 3	FALSE	FALSE	TRUE	TRUE	FALSE	FALSE
20200205_TTNGFP_D4_GATA6ChIP_001_peak_10493	chr16	1394884	1395000	117	*	14.5	+	Exon (uc002clj.3/8938, exon 21 of 34)	16	1399241	1401873	2633	2	115939	uc002cll.3	6873	ENSG00000007520	TSR3	TSR3 ribosome maturation factor	FALSE	FALSE	FALSE	TRUE	FALSE	FALSE
20200205_TTNGFP_D4_GATA6ChIP_001_peak_10495	chr16	1412600	1412724	125	*	10.3	+	Exon (uc002clm.3/84572, exon 9 of 11)	16	1401900	1413352	11453	1	84572	uc002clm.3	10700	ENSG00000090581	GNPTG	N-acetylglucosamine-1-phosphate transferase subunit gamma	FALSE	FALSE	FALSE	FALSE	FALSE	FALSE
20200205_TTNGFP_D4_GATA6ChIP_001_peak_10496	chr16	1414693	1414966	274	*	18.8	+	3' UTR	16	1401900	1413352	11453	1	84572	uc002clm.3	12793	ENSG00000090581	GNPTG	N-acetylglucosamine-1-phosphate transferase subunit gamma	FALSE	FALSE	FALSE	FALSE	FALSE	FALSE
20200205_TTNGFP_D4_GATA6ChIP_001_peak_10497	chr16	1421261	1421922	662	*	39.5	+	5' UTR	16	1413206	1429684	16479	2	64718	uc002cln.3	7762	ENSG00000059145	UNKL	unk like zinc finger	FALSE	FALSE	FALSE	FALSE	FALSE	FALSE
20200205_TTNGFP_D4_GATA6ChIP_001_peak_10499	chr16	1426239	1426372	134	*	10.7	+	Intron (uc002cln.3/64718, intron 1 of 5)	16	1413206	1429684	16479	2	64718	uc002cln.3	3312	ENSG00000059145	UNKL	unk like zinc finger	FALSE	FALSE	FALSE	FALSE	FALSE	FALSE
20200205_TTNGFP_D4_GATA6ChIP_001_peak_105	chr1	1414773	1415206	434	*	56	+	Promoter (1-2kb)	1	1413406	1431582	18177	1	83858	uc001afx.3	1367	ENSG00000160072	ATAD3B	ATPase family AAA domain containing 3B	FALSE	FALSE	FALSE	FALSE	FALSE	FALSE
20200205_TTNGFP_D4_GATA6ChIP_001_peak_10501	chr16	1438620	1438755	136	*	21.2	+	Promoter (8-9kb)	16	1413206	1429684	16479	2	64718	uc002clp.3	-8936	ENSG00000059145	UNKL	unk like zinc finger	FALSE	FALSE	FALSE	FALSE	FALSE	FALSE
20200205_TTNGFP_D4_GATA6ChIP_001_peak_10508	chr16	1488373	1488566	194	*	20.7	+	Promoter (3-4kb)	16	1484389	1485303	915	2	645811	uc010brp.3	-3070	ENSG00000197599	CCDC154	coiled-coil domain containing 154	FALSE	FALSE	FALSE	FALSE	FALSE	FALSE
20200205_TTNGFP_D4_GATA6ChIP_001_peak_10509	chr16	1493470	1493643	174	*	11.8	+	Promoter (<=1kb)	16	1484389	1494490	10102	2	645811	uc010uve.2	847	ENSG00000197599	CCDC154	coiled-coil domain containing 154	FALSE	FALSE	FALSE	FALSE	FALSE	FALSE
20200205_TTNGFP_D4_GATA6ChIP_001_peak_1051	chr1	17046217	17046708	492	*	51.3	+	Promoter (<=1kb)	1	17017713	17046652	28940	2	284729	uc001azn.1	0	ENSG00000268869	ESPNP	espin pseudogene	FALSE	FALSE	FALSE	FALSE	FALSE	FALSE
20200205_TTNGFP_D4_GATA6ChIP_001_peak_10510	chr16	1493851	1494107	257	*	18.5	+	Promoter (<=1kb)	16	1484389	1494490	10102	2	645811	uc010uve.2	383	ENSG00000197599	CCDC154	coiled-coil domain containing 154	FALSE	FALSE	FALSE	FALSE	FALSE	FALSE
20200205_TTNGFP_D4_GATA6ChIP_001_peak_10511	chr16	1495373	1495721	349	*	19.1	+	Promoter (<=1kb)	16	1484389	1494490	10102	2	645811	uc010uve.2	-883	ENSG00000197599	CCDC154	coiled-coil domain containing 154	FALSE	FALSE	FALSE	FALSE	FALSE	FALSE
20200205_TTNGFP_D4_GATA6ChIP_001_peak_10513	chr16	1498337	1498623	287	*	21	+	Promoter (1-2kb)	16	1494934	1499798	4865	2	1186	uc002clu.3	1175	ENSG00000103249	CLCN7	chloride voltage-gated channel 7	FALSE	FALSE	FALSE	TRUE	FALSE	FALSE
20200205_TTNGFP_D4_GATA6ChIP_001_peak_10514	chr16	1506866	1507379	514	*	36.8	+	Promoter (7-8kb)	16	1494934	1499798	4865	2	1186	uc002clu.3	-7068	ENSG00000103249	CLCN7	chloride voltage-gated channel 7	FALSE	FALSE	FALSE	TRUE	FALSE	FALSE
20200205_TTNGFP_D4_GATA6ChIP_001_peak_10517	chr16	1515967	1516202	236	*	22.3	+	Intron (uc002clv.3/1186, intron 1 of 24)	16	1494934	1525085	30152	2	1186	uc002clv.3	8883	ENSG00000103249	CLCN7	chloride voltage-gated channel 7	FALSE	FALSE	FALSE	TRUE	FALSE	FALSE
20200205_TTNGFP_D4_GATA6ChIP_001_peak_10518	chr16	1517179	1517450	272	*	20.6	+	Intron (uc002clv.3/1186, intron 1 of 24)	16	1494934	1525085	30152	2	1186	uc002clv.3	7635	ENSG00000103249	CLCN7	chloride voltage-gated channel 7	FALSE	FALSE	FALSE	TRUE	FALSE	FALSE
20200205_TTNGFP_D4_GATA6ChIP_001_peak_10519	chr16	1535951	1536103	153	*	16.2	+	Promoter (2-3kb)	16	1535940	1538468	2529	2	390667	uc010uvf.2	2365	ENSG00000251692	PTX4	pentraxin 4	FALSE	FALSE	FALSE	FALSE	FALSE	FALSE
20200205_TTNGFP_D4_GATA6ChIP_001_peak_1052	chr1	17050591	17050841	251	*	30	+	Promoter (3-4kb)	1	17017713	17046652	28940	2	284729	uc001azn.1	-3939	ENSG00000268869	ESPNP	espin pseudogene	FALSE	FALSE	FALSE	FALSE	FALSE	FALSE
20200205_TTNGFP_D4_GATA6ChIP_001_peak_10520	chr16	1541141	1541281	141	*	10.7	+	Promoter (2-3kb)	16	1543352	1550700	7349	1	9894	uc010uvg.1	-2071	ENSG00000100726	TELO2	telomere maintenance 2	FALSE	FALSE	FALSE	FALSE	FALSE	FALSE
20200205_TTNGFP_D4_GATA6ChIP_001_peak_10521	chr16	1550180	1550416	237	*	20.3	+	Exon (uc010uvg.1/9894, exon 8 of 9)	16	1543352	1560460	17109	1	9894	uc002cly.3	6828	ENSG00000100726	TELO2	telomere maintenance 2	FALSE	FALSE	FALSE	FALSE	FALSE	FALSE
20200205_TTNGFP_D4_GATA6ChIP_001_peak_10522	chr16	1551367	1551496	130	*	9.1	+	Exon (uc002cly.3/9894, exon 10 of 21)	16	1543352	1560460	17109	1	9894	uc002cly.3	8015	ENSG00000100726	TELO2	telomere maintenance 2	FALSE	FALSE	FALSE	FALSE	FALSE	FALSE
20200205_TTNGFP_D4_GATA6ChIP_001_peak_10523	chr16	1555127	1555567	441	*	36.6	+	Exon (uc002cly.3/9894, exon 16 of 21)	16	1543352	1560460	17109	1	9894	uc002cly.3	11775	ENSG00000100726	TELO2	telomere maintenance 2	FALSE	FALSE	FALSE	FALSE	FALSE	FALSE
20200205_TTNGFP_D4_GATA6ChIP_001_peak_10524	chr16	1559500	1559743	244	*	17.6	+	Intron (uc002cly.3/9894, intron 20 of 20)	16	1543352	1560460	17109	1	9894	uc002cly.3	16148	ENSG00000100726	TELO2	telomere maintenance 2	FALSE	FALSE	FALSE	FALSE	FALSE	FALSE
20200205_TTNGFP_D4_GATA6ChIP_001_peak_10528	chr16	1578477	1578912	436	*	51.3	+	Promoter (<=1kb)	16	1578742	1605581	26840	1	79652	uc002cmc.3	0	ENSG00000131634	TMEM204	transmembrane protein 204	TRUE	FALSE	FALSE	FALSE	FALSE	TRUE
20200205_TTNGFP_D4_GATA6ChIP_001_peak_1053	chr1	17054378	17054561	184	*	41.2	+	Promoter (7-8kb)	1	17017713	17046652	28940	2	284729	uc001azn.1	-7726	ENSG00000268869	ESPNP	espin pseudogene	FALSE	FALSE	FALSE	FALSE	FALSE	FALSE
20200205_TTNGFP_D4_GATA6ChIP_001_peak_10530	chr16	1584489	1584658	170	*	15.1	+	Promoter (<=1kb)	16	1583658	1605581	21924	1	79652	uc002cmd.3	831	ENSG00000131634	TMEM204	transmembrane protein 204	FALSE	FALSE	FALSE	FALSE	FALSE	FALSE
20200205_TTNGFP_D4_GATA6ChIP_001_peak_10535	chr16	1600591	1601028	438	*	35.3	+	Intron (uc002cmc.3/79652, intron 3 of 3)	16	1583658	1605581	21924	1	79652	uc002cmd.3	16933	ENSG00000131634	TMEM204	transmembrane protein 204	FALSE	FALSE	FALSE	FALSE	FALSE	FALSE
20200205_TTNGFP_D4_GATA6ChIP_001_peak_10536	chr16	1605052	1605258	207	*	34.5	+	3' UTR	16	1583658	1605581	21924	1	79652	uc002cmd.3	21394	ENSG00000131634	TMEM204	transmembrane protein 204	FALSE	FALSE	FALSE	FALSE	FALSE	FALSE
20200205_TTNGFP_D4_GATA6ChIP_001_peak_10537	chr16	1608501	1608864	364	*	32.8	+	Intron (uc002clz.3/9742, intron 9 of 21)	16	1583658	1605581	21924	1	79652	uc002cmd.3	24843	ENSG00000131634	TMEM204	transmembrane protein 204	FALSE	FALSE	FALSE	FALSE	FALSE	FALSE
20200205_TTNGFP_D4_GATA6ChIP_001_peak_10538	chr16	1643586	1643881	296	*	20.7	+	Promoter (7-8kb)	16	1560428	1636276	75849	2	9742	uc002clz.3	-7310	ENSG00000187535	IFT140	intraflagellar transport 140	FALSE	FALSE	FALSE	FALSE	FALSE	FALSE
20200205_TTNGFP_D4_GATA6ChIP_001_peak_10541	chr16	1688757	1689053	297	*	25.1	+	Intron (uc010uvh.2/57585, intron 4 of 19)	16	1682213	1736695	54483	1	57585	uc002cmf.3	6544	ENSG00000007545	CRAMP1	cramped chromatin regulator homolog 1	FALSE	FALSE	FALSE	FALSE	FALSE	FALSE
20200205_TTNGFP_D4_GATA6ChIP_001_peak_10542	chr16	1692495	1692627	133	*	16	+	Intron (uc010uvh.2/57585, intron 5 of 19)	16	1682213	1736695	54483	1	57585	uc002cmf.3	10282	ENSG00000007545	CRAMP1	cramped chromatin regulator homolog 1	FALSE	FALSE	FALSE	FALSE	FALSE	FALSE
20200205_TTNGFP_D4_GATA6ChIP_001_peak_10546	chr16	1777841	1778007	167	*	17.9	+	Promoter (6-7kb)	16	1784986	1785067	82	1	100423012	uc021tai.1	-6979	ENSG00000265820	MIR3177	microRNA 3177	FALSE	FALSE	FALSE	TRUE	FALSE	FALSE
20200205_TTNGFP_D4_GATA6ChIP_001_peak_10547	chr16	1784213	1784378	166	*	17.6	+	Promoter (<=1kb)	16	1784986	1785067	82	1	100423012	uc021tai.1	-608	ENSG00000265820	MIR3177	microRNA 3177	FALSE	FALSE	FALSE	TRUE	FALSE	FALSE
20200205_TTNGFP_D4_GATA6ChIP_001_peak_10548	chr16	1786515	1786751	237	*	13.9	+	Promoter (1-2kb)	16	1784986	1785067	82	1	100423012	uc021tai.1	1529	ENSG00000265820	MIR3177	microRNA 3177	FALSE	FALSE	FALSE	TRUE	FALSE	FALSE
20200205_TTNGFP_D4_GATA6ChIP_001_peak_10549	chr16	1789392	1789633	242	*	10.1	+	Intron (uc002cmi.1/23162, intron 4 of 4)	16	1784986	1785067	82	1	100423012	uc021tai.1	4406	ENSG00000265820	MIR3177	microRNA 3177	FALSE	FALSE	FALSE	TRUE	FALSE	FALSE
20200205_TTNGFP_D4_GATA6ChIP_001_peak_10552	chr16	1791331	1791448	118	*	12.1	+	Intron (uc002cmi.1/23162, intron 4 of 4)	16	1784986	1785067	82	1	100423012	uc021tai.1	6345	ENSG00000265820	MIR3177	microRNA 3177	FALSE	FALSE	FALSE	TRUE	FALSE	FALSE
20200205_TTNGFP_D4_GATA6ChIP_001_peak_10554	chr16	1793467	1793644	178	*	15.4	+	3' UTR	16	1784986	1785067	82	1	100423012	uc021tai.1	8481	ENSG00000265820	MIR3177	microRNA 3177	FALSE	FALSE	FALSE	TRUE	FALSE	FALSE
20200205_TTNGFP_D4_GATA6ChIP_001_peak_10555	chr16	1794550	1794686	137	*	13.9	+	3' UTR	16	1784986	1785067	82	1	100423012	uc021tai.1	9564	ENSG00000265820	MIR3177	microRNA 3177	FALSE	FALSE	FALSE	TRUE	FALSE	FALSE
20200205_TTNGFP_D4_GATA6ChIP_001_peak_10556	chr16	1806536	1806656	121	*	8.8	+	Intron (uc002cmk.3/23162, intron 8 of 31)	16	1820321	1821710	1390	2	4832	uc002cmm.3	15054	ENSG00000103024	NME3	NME/NM23 nucleoside diphosphate kinase 3	FALSE	FALSE	FALSE	TRUE	FALSE	FALSE
20200205_TTNGFP_D4_GATA6ChIP_001_peak_10557	chr16	1809263	1809643	381	*	33.3	+	Intron (uc002cmk.3/23162, intron 10 of 31)	16	1820321	1821710	1390	2	4832	uc002cmm.3	12067	ENSG00000103024	NME3	NME/NM23 nucleoside diphosphate kinase 3	FALSE	FALSE	FALSE	TRUE	FALSE	FALSE
20200205_TTNGFP_D4_GATA6ChIP_001_peak_10560	chr16	1817309	1817558	250	*	20.3	+	Intron (uc002cmk.3/23162, intron 26 of 31)	16	1820321	1821710	1390	2	4832	uc002cmm.3	4152	ENSG00000103024	NME3	NME/NM23 nucleoside diphosphate kinase 3	FALSE	FALSE	FALSE	TRUE	FALSE	FALSE
20200205_TTNGFP_D4_GATA6ChIP_001_peak_10562	chr16	1827284	1827586	303	*	20	+	Exon (uc002cmt.3/90864, exon 6 of 6)	16	1823229	1826340	3112	1	197342	uc010brw.1	4055	ENSG00000197774	EME2	essential meiotic structure-specific endonuclease subunit 2	FALSE	FALSE	FALSE	FALSE	FALSE	FALSE
20200205_TTNGFP_D4_GATA6ChIP_001_peak_10563	chr16	1829538	1829775	238	*	24.8	+	Promoter (2-3kb)	16	1826713	1832506	5794	2	90864	uc002cmt.3	2731	ENSG00000162032	SPSB3	splA/ryanodine receptor domain and SOCS box containing 3	FALSE	FALSE	FALSE	FALSE	FALSE	FALSE
20200205_TTNGFP_D4_GATA6ChIP_001_peak_10564	chr16	1835169	1835329	161	*	11.8	+	Promoter (2-3kb)	16	1832933	1839192	6260	1	10101	uc002cmx.4	2236	ENSG00000095906	NUBP2	nucleotide binding protein 2	FALSE	FALSE	FALSE	FALSE	FALSE	FALSE
20200205_TTNGFP_D4_GATA6ChIP_001_peak_10568	chr16	1837836	1837960	125	*	7.9	+	Exon (uc002cmw.4/10101, exon 5 of 7)	16	1832933	1839192	6260	1	10101	uc002cmx.4	4903	ENSG00000095906	NUBP2	nucleotide binding protein 2	FALSE	FALSE	FALSE	FALSE	FALSE	FALSE
20200205_TTNGFP_D4_GATA6ChIP_001_peak_10569	chr16	1838133	1838250	118	*	15	+	Exon (uc002cmw.4/10101, exon 6 of 7)	16	1832933	1839192	6260	1	10101	uc002cmx.4	5200	ENSG00000095906	NUBP2	nucleotide binding protein 2	FALSE	FALSE	FALSE	FALSE	FALSE	FALSE
20200205_TTNGFP_D4_GATA6ChIP_001_peak_10570	chr16	1838405	1838580	176	*	24.1	+	Exon (uc002cmw.4/10101, exon 7 of 7)	16	1840414	1843734	3321	2	3483	uc002cmy.3	5154	ENSG00000099769	IGFALS	insulin like growth factor binding protein acid labile subunit	FALSE	FALSE	FALSE	FALSE	FALSE	FALSE
20200205_TTNGFP_D4_GATA6ChIP_001_peak_10573	chr16	1845355	1845503	149	*	19.5	+	Promoter (<=1kb)	16	1840414	1844909	4496	2	3483	uc010uvo.2	-446	ENSG00000099769	IGFALS	insulin like growth factor binding protein acid labile subunit	FALSE	FALSE	FALSE	FALSE	FALSE	FALSE
20200205_TTNGFP_D4_GATA6ChIP_001_peak_10574	chr16	1861289	1861465	177	*	15.4	+	Intron (uc002cmz.3/3029, intron 8 of 9)	16	1859104	1877195	18092	2	3029	uc002cmz.3	15730	ENSG00000063854	HAGH	hydroxyacylglutathione hydrolase	FALSE	FALSE	FALSE	FALSE	FALSE	FALSE
20200205_TTNGFP_D4_GATA6ChIP_001_peak_10575	chr16	1866713	1866880	168	*	20.9	+	Intron (uc002cmz.3/3029, intron 8 of 9)	16	1859104	1877195	18092	2	3029	uc002cmz.3	10315	ENSG00000063854	HAGH	hydroxyacylglutathione hydrolase	FALSE	FALSE	FALSE	FALSE	FALSE	FALSE
20200205_TTNGFP_D4_GATA6ChIP_001_peak_10576	chr16	1870821	1870969	149	*	11.7	+	Intron (uc002cmz.3/3029, intron 4 of 9)	16	1859104	1877195	18092	2	3029	uc002cmz.3	6226	ENSG00000063854	HAGH	hydroxyacylglutathione hydrolase	FALSE	FALSE	FALSE	FALSE	FALSE	FALSE
20200205_TTNGFP_D4_GATA6ChIP_001_peak_10578	chr16	1954110	1954429	320	*	16.8	+	Intron (uc021tak.1/uc021tak.1, intron 1 of 1)	16	1961465	1968231	6767	2	64711	uc002cnf.3	13802	ENSG00000162040	HS3ST6	heparan sulfate-glucosamine 3-sulfotransferase 6	FALSE	FALSE	FALSE	FALSE	FALSE	FALSE
20200205_TTNGFP_D4_GATA6ChIP_001_peak_10579	chr16	1958359	1958483	125	*	9.2	+	Intron (uc021tak.1/uc021tak.1, intron 1 of 1)	16	1961465	1968231	6767	2	64711	uc002cnf.3	9748	ENSG00000162040	HS3ST6	heparan sulfate-glucosamine 3-sulfotransferase 6	FALSE	FALSE	FALSE	FALSE	FALSE	FALSE
20200205_TTNGFP_D4_GATA6ChIP_001_peak_1058	chr1	17199248	17199379	132	*	18.5	+	Exon (uc021ohf.2/uc021ohf.2, exon 1 of 2)	1	17185444	17185516	73	2	100500876	uc021ohc.1	-13732	ENSG00000263811	MIR3675	microRNA 3675	TRUE	FALSE	FALSE	FALSE	FALSE	TRUE
20200205_TTNGFP_D4_GATA6ChIP_001_peak_10582	chr16	1970152	1970431	280	*	29.5	+	Promoter (1-2kb)	16	1961465	1968231	6767	2	64711	uc002cnf.3	-1921	ENSG00000162040	HS3ST6	heparan sulfate-glucosamine 3-sulfotransferase 6	FALSE	FALSE	FALSE	FALSE	FALSE	FALSE
20200205_TTNGFP_D4_GATA6ChIP_001_peak_10588	chr16	2012628	2013015	388	*	34.2	+	Promoter (<=1kb)	16	2012974	2013107	134	2	26784	uc002cnq.2	92	ENSG00000207405	SNORA64	small nucleolar RNA, H/ACA box 64	FALSE	FALSE	FALSE	FALSE	FALSE	FALSE
20200205_TTNGFP_D4_GATA6ChIP_001_peak_10589	chr16	2017504	2017699	196	*	16.3	+	Promoter (<=1kb)	16	2016875	2018976	2102	1	146310	uc002cnt.1	629	ENSG00000179580	RNF151	ring finger protein 151	FALSE	FALSE	FALSE	FALSE	FALSE	FALSE
20200205_TTNGFP_D4_GATA6ChIP_001_peak_1059	chr1	17215803	17216174	372	*	42.8	+	Exon (uc021ohh.1/uc021ohh.1, exon 1 of 1)	1	17185444	17185516	73	2	100500876	uc021ohc.1	-30287	ENSG00000263811	MIR3675	microRNA 3675	TRUE	FALSE	FALSE	FALSE	TRUE	TRUE
20200205_TTNGFP_D4_GATA6ChIP_001_peak_10591	chr16	2029298	2029607	310	*	16.5	+	Promoter (1-2kb)	16	2027515	2028751	1237	1	10607	uc002cnw.1	1783	ENSG00000183751	TBL3	transducin beta like 3	FALSE	FALSE	FALSE	FALSE	FALSE	FALSE
20200205_TTNGFP_D4_GATA6ChIP_001_peak_10592	chr16	2050080	2050667	588	*	35.3	+	Promoter (1-2kb)	16	2047653	2052424	4772	2	90850	uc002coe.2	1757	ENSG00000167962	ZNF598	zinc finger protein 598	FALSE	FALSE	FALSE	FALSE	FALSE	FALSE
20200205_TTNGFP_D4_GATA6ChIP_001_peak_10593	chr16	2073061	2073193	133	*	7.3	+	Intron (uc021tak.1/uc021tak.1, intron 1 of 1)	16	2069521	2070756	1236	1	283869	uc002coh.4	3540	ENSG00000183971	NPW	neuropeptide W	FALSE	FALSE	FALSE	FALSE	FALSE	FALSE
20200205_TTNGFP_D4_GATA6ChIP_001_peak_10595	chr16	2082125	2082325	201	*	23.5	+	Promoter (<=1kb)	16	2083265	2089027	5763	1	9351	uc002cok.3	-940	ENSG00000065054	SLC9A3R2	SLC9A3 regulator 2	FALSE	FALSE	FALSE	FALSE	FALSE	FALSE
20200205_TTNGFP_D4_GATA6ChIP_001_peak_10596	chr16	2082704	2083036	333	*	18	+	Promoter (<=1kb)	16	2083265	2089027	5763	1	9351	uc002cok.3	-229	ENSG00000065054	SLC9A3R2	SLC9A3 regulator 2	FALSE	FALSE	FALSE	FALSE	FALSE	FALSE
20200205_TTNGFP_D4_GATA6ChIP_001_peak_10597	chr16	2083964	2084092	129	*	12.7	+	Promoter (<=1kb)	16	2083265	2089027	5763	1	9351	uc021tao.1	699	ENSG00000065054	SLC9A3R2	SLC9A3 regulator 2	FALSE	FALSE	FALSE	FALSE	FALSE	FALSE
20200205_TTNGFP_D4_GATA6ChIP_001_peak_10598	chr16	2086688	2086843	156	*	13	+	Exon (uc002coi.3/9351, exon 4 of 7)	16	2083265	2089027	5763	1	9351	uc021tao.1	3423	ENSG00000065054	SLC9A3R2	SLC9A3 regulator 2	FALSE	FALSE	FALSE	FALSE	FALSE	FALSE
20200205_TTNGFP_D4_GATA6ChIP_001_peak_10599	chr16	2087411	2087784	374	*	31.5	+	Exon (uc002coi.3/9351, exon 6 of 7)	16	2083265	2089027	5763	1	9351	uc021tao.1	4146	ENSG00000065054	SLC9A3R2	SLC9A3 regulator 2	FALSE	FALSE	FALSE	FALSE	FALSE	FALSE
20200205_TTNGFP_D4_GATA6ChIP_001_peak_106	chr1	1430398	1430816	419	*	24.2	+	Intron (uc001afv.3/83858, intron 15 of 15)	1	1421162	1444689	23528	1	83858	uc021oeq.1	9236	ENSG00000160072	ATAD3B	ATPase family AAA domain containing 3B	FALSE	FALSE	FALSE	FALSE	FALSE	FALSE
20200205_TTNGFP_D4_GATA6ChIP_001_peak_1060	chr1	17231466	17231680	215	*	36	+	Intron (uc009voy.1/9696, intron 1 of 8)	1	17248445	17299474	51030	1	9696	uc001azt.2	-16765	ENSG00000058453	CROCC	ciliary rootlet coiled-coil, rootletin	FALSE	FALSE	FALSE	FALSE	TRUE	TRUE
20200205_TTNGFP_D4_GATA6ChIP_001_peak_10600	chr16	2090720	2090918	199	*	14.8	+	Intron (uc021tak.1/uc021tak.1, intron 1 of 1)	16	2089816	2097867	8052	2	4913	uc002col.1	6949	ENSG00000065057	NTHL1	nth like DNA glycosylase 1	FALSE	FALSE	FALSE	FALSE	FALSE	FALSE
20200205_TTNGFP_D4_GATA6ChIP_001_peak_10601	chr16	2091231	2091437	207	*	16.5	+	Intron (uc021tak.1/uc021tak.1, intron 1 of 1)	16	2089816	2097867	8052	2	4913	uc002col.1	6430	ENSG00000065057	NTHL1	nth like DNA glycosylase 1	FALSE	FALSE	FALSE	FALSE	FALSE	FALSE
20200205_TTNGFP_D4_GATA6ChIP_001_peak_10602	chr16	2092307	2092606	300	*	18.8	+	Intron (uc021tak.1/uc021tak.1, intron 1 of 1)	16	2089816	2097867	8052	2	4913	uc002col.1	5261	ENSG00000065057	NTHL1	nth like DNA glycosylase 1	FALSE	FALSE	FALSE	FALSE	FALSE	FALSE
20200205_TTNGFP_D4_GATA6ChIP_001_peak_10603	chr16	2093185	2093568	384	*	30.6	+	Exon (uc002col.1/4913, exon 4 of 6)	16	2089816	2097867	8052	2	4913	uc002col.1	4299	ENSG00000065057	NTHL1	nth like DNA glycosylase 1	FALSE	FALSE	FALSE	FALSE	FALSE	FALSE
20200205_TTNGFP_D4_GATA6ChIP_001_peak_10604	chr16	2095847	2096046	200	*	23.2	+	Promoter (1-2kb)	16	2089816	2097867	8052	2	4913	uc002col.1	1821	ENSG00000065057	NTHL1	nth like DNA glycosylase 1	FALSE	FALSE	FALSE	FALSE	FALSE	FALSE
20200205_TTNGFP_D4_GATA6ChIP_001_peak_10607	chr16	2110634	2110794	161	*	21.5	+	Exon (uc002con.3/7249, exon 11 of 42)	16	2097990	2138713	40724	1	7249	uc010uvw.2	12644	ENSG00000103197	TSC2	TSC complex subunit 2	FALSE	FALSE	FALSE	FALSE	FALSE	FALSE
20200205_TTNGFP_D4_GATA6ChIP_001_peak_10608	chr16	2112211	2112354	144	*	13.9	+	Intron (uc002con.3/7249, intron 12 of 41)	16	2097990	2138713	40724	1	7249	uc010uvw.2	14221	ENSG00000103197	TSC2	TSC complex subunit 2	FALSE	FALSE	FALSE	FALSE	FALSE	FALSE
20200205_TTNGFP_D4_GATA6ChIP_001_peak_10609	chr16	2114089	2114234	146	*	21.3	+	Intron (uc002con.3/7249, intron 14 of 41)	16	2097990	2138713	40724	1	7249	uc010uvw.2	16099	ENSG00000103197	TSC2	TSC complex subunit 2	FALSE	FALSE	FALSE	FALSE	FALSE	FALSE
20200205_TTNGFP_D4_GATA6ChIP_001_peak_10611	chr16	2124485	2124784	300	*	20.3	+	Promoter (7-8kb)	16	2132698	2138713	6016	1	7249	uc002coq.3	-7914	ENSG00000103197	TSC2	TSC complex subunit 2	FALSE	FALSE	FALSE	FALSE	FALSE	FALSE
20200205_TTNGFP_D4_GATA6ChIP_001_peak_10613	chr16	2128597	2128833	237	*	25.4	+	Promoter (3-4kb)	16	2132698	2138713	6016	1	7249	uc002coq.3	-3865	ENSG00000103197	TSC2	TSC complex subunit 2	FALSE	FALSE	FALSE	FALSE	FALSE	FALSE
20200205_TTNGFP_D4_GATA6ChIP_001_peak_10616	chr16	2135665	2136030	366	*	25.9	+	Promoter (2-3kb)	16	2132698	2138713	6016	1	7249	uc002coq.3	2967	ENSG00000103197	TSC2	TSC complex subunit 2	FALSE	FALSE	FALSE	FALSE	FALSE	FALSE
20200205_TTNGFP_D4_GATA6ChIP_001_peak_10619	chr16	2138855	2139193	339	*	27.1	+	Promoter (1-2kb)	16	2140196	2140285	90	2	100188847	uc021tap.1	1092	ENSG00000221656	MIR1225	microRNA 1225	FALSE	FALSE	FALSE	FALSE	FALSE	FALSE
20200205_TTNGFP_D4_GATA6ChIP_001_peak_1062	chr1	17250543	17250811	269	*	30.9	+	Promoter (1-2kb)	1	17249158	17280852	31695	1	9696	uc009voz.1	1385	ENSG00000058453	CROCC	ciliary rootlet coiled-coil, rootletin	FALSE	FALSE	FALSE	FALSE	FALSE	FALSE
20200205_TTNGFP_D4_GATA6ChIP_001_peak_10622	chr16	2149011	2149413	403	*	22.7	+	Intron (uc021tak.1/uc021tak.1, intron 1 of 1)	16	2140885	2153896	13012	2	5310	uc010bse.1	4483	ENSG00000008710	PKD1	polycystin 1, transient receptor potential channel interacting	TRUE	FALSE	FALSE	FALSE	FALSE	FALSE
20200205_TTNGFP_D4_GATA6ChIP_001_peak_10623	chr16	2150701	2150851	151	*	13.6	+	Intron (uc021tak.1/uc021tak.1, intron 1 of 1)	16	2140885	2153896	13012	2	5310	uc010bse.1	3045	ENSG00000008710	PKD1	polycystin 1, transient receptor potential channel interacting	FALSE	FALSE	FALSE	FALSE	FALSE	FALSE
20200205_TTNGFP_D4_GATA6ChIP_001_peak_10627	chr16	2157782	2158068	287	*	22.6	+	Promoter (3-4kb)	16	2140885	2153896	13012	2	5310	uc010bse.1	-3886	ENSG00000008710	PKD1	polycystin 1, transient receptor potential channel interacting	FALSE	FALSE	FALSE	FALSE	FALSE	FALSE
20200205_TTNGFP_D4_GATA6ChIP_001_peak_10628	chr16	2158936	2159155	220	*	21.2	+	Promoter (5-6kb)	16	2140885	2153896	13012	2	5310	uc010bse.1	-5040	ENSG00000008710	PKD1	polycystin 1, transient receptor potential channel interacting	FALSE	FALSE	FALSE	FALSE	FALSE	FALSE
20200205_TTNGFP_D4_GATA6ChIP_001_peak_1063	chr1	17252916	17253167	252	*	27.4	+	Intron (uc009voy.1/9696, intron 1 of 8)	1	17249158	17280852	31695	1	9696	uc009voz.1	3758	ENSG00000058453	CROCC	ciliary rootlet coiled-coil, rootletin	FALSE	FALSE	FALSE	FALSE	TRUE	FALSE
20200205_TTNGFP_D4_GATA6ChIP_001_peak_10630	chr16	2160001	2160328	328	*	23.8	+	Promoter (6-7kb)	16	2140885	2153896	13012	2	5310	uc010bse.1	-6105	ENSG00000008710	PKD1	polycystin 1, transient receptor potential channel interacting	FALSE	FALSE	FALSE	FALSE	FALSE	FALSE
20200205_TTNGFP_D4_GATA6ChIP_001_peak_10631	chr16	2161187	2161614	428	*	33.8	+	Promoter (7-8kb)	16	2140885	2153896	13012	2	5310	uc010bse.1	-7291	ENSG00000008710	PKD1	polycystin 1, transient receptor potential channel interacting	FALSE	FALSE	FALSE	FALSE	FALSE	FALSE
20200205_TTNGFP_D4_GATA6ChIP_001_peak_10632	chr16	2164308	2164560	253	*	16.3	+	Exon (uc002cos.1/5310, exon 11 of 46)	16	2140885	2153896	13012	2	5310	uc010bse.1	-10412	ENSG00000008710	PKD1	polycystin 1, transient receptor potential channel interacting	FALSE	FALSE	FALSE	FALSE	FALSE	FALSE
20200205_TTNGFP_D4_GATA6ChIP_001_peak_10634	chr16	2176394	2176639	246	*	14.7	+	Promoter (6-7kb)	16	2183120	2183205	86	1	100616258	uc021taq.1	-6481	ENSG00000265867	MIR4516	microRNA 4516	FALSE	FALSE	FALSE	FALSE	FALSE	FALSE
20200205_TTNGFP_D4_GATA6ChIP_001_peak_10635	chr16	2177193	2177446	254	*	18.8	+	Promoter (5-6kb)	16	2183120	2183205	86	1	100616258	uc021taq.1	-5674	ENSG00000265867	MIR4516	microRNA 4516	FALSE	FALSE	FALSE	FALSE	FALSE	FALSE
20200205_TTNGFP_D4_GATA6ChIP_001_peak_10636	chr16	2207074	2207301	228	*	11.4	+	Promoter (1-2kb)	16	2205799	2228130	22332	1	84231	uc002cow.3	1275	ENSG00000131653	TRAF7	TNF receptor associated factor 7	FALSE	FALSE	FALSE	FALSE	FALSE	FALSE
20200205_TTNGFP_D4_GATA6ChIP_001_peak_10637	chr16	2213757	2214009	253	*	20.7	+	5' UTR	16	2205799	2228130	22332	1	84231	uc002cow.3	7958	ENSG00000131653	TRAF7	TNF receptor associated factor 7	FALSE	FALSE	FALSE	FALSE	FALSE	FALSE
20200205_TTNGFP_D4_GATA6ChIP_001_peak_10639	chr16	2218851	2219137	287	*	16.8	+	Intron (uc002cow.3/84231, intron 4 of 20)	16	2205799	2228130	22332	1	84231	uc002cow.3	13052	ENSG00000131653	TRAF7	TNF receptor associated factor 7	FALSE	FALSE	FALSE	FALSE	FALSE	FALSE
20200205_TTNGFP_D4_GATA6ChIP_001_peak_1064	chr1	17256023	17256323	301	*	48.9	+	Intron (uc009voy.1/9696, intron 1 of 8)	1	17249158	17280852	31695	1	9696	uc009voz.1	6865	ENSG00000058453	CROCC	ciliary rootlet coiled-coil, rootletin	FALSE	FALSE	FALSE	FALSE	FALSE	FALSE
20200205_TTNGFP_D4_GATA6ChIP_001_peak_10641	chr16	2220642	2221035	394	*	26.2	+	Exon (uc002cow.3/84231, exon 5 of 21)	16	2205799	2228130	22332	1	84231	uc002cow.3	14843	ENSG00000131653	TRAF7	TNF receptor associated factor 7	FALSE	FALSE	FALSE	FALSE	FALSE	FALSE
20200205_TTNGFP_D4_GATA6ChIP_001_peak_10645	chr16	2231897	2232264	368	*	36.5	+	Exon (uc010bsg.1/57524, exon 17 of 20)	16	2227184	2246465	19282	2	57524	uc010bsg.1	14201	ENSG00000167971	CASKIN1	CASK interacting protein 1	FALSE	FALSE	FALSE	FALSE	FALSE	FALSE
20200205_TTNGFP_D4_GATA6ChIP_001_peak_10646	chr16	2233716	2233956	241	*	23.5	+	Exon (uc010bsg.1/57524, exon 15 of 20)	16	2227184	2246465	19282	2	57524	uc010bsg.1	12509	ENSG00000167971	CASKIN1	CASK interacting protein 1	FALSE	FALSE	FALSE	FALSE	FALSE	FALSE
20200205_TTNGFP_D4_GATA6ChIP_001_peak_10651	chr16	2261856	2262247	392	*	30.3	+	Promoter (<=1kb)	16	2259363	2261069	1707	2	283870	uc010bsh.3	-787	ENSG00000182685	BRICD5	BRICHOS domain containing 5	FALSE	FALSE	FALSE	FALSE	FALSE	FALSE
20200205_TTNGFP_D4_GATA6ChIP_001_peak_10653	chr16	2278686	2278944	259	*	20.3	+	Intron (uc002cpm.3/1877, intron 2 of 13)	16	2273567	2285743	12177	1	1877	uc010bsj.3	5119	ENSG00000167967	E4F1	E4F transcription factor 1	TRUE	FALSE	FALSE	FALSE	FALSE	FALSE
20200205_TTNGFP_D4_GATA6ChIP_001_peak_10655	chr16	2293872	2294355	484	*	38.6	+	Intron (uc002cpr.3/1632, intron 4 of 6)	16	2289873	2301602	11730	2	1632	uc002cpr.3	7247	ENSG00000167969	ECI1	enoyl-CoA delta isomerase 1	TRUE	FALSE	FALSE	TRUE	FALSE	FALSE
20200205_TTNGFP_D4_GATA6ChIP_001_peak_10656	chr16	2294618	2294747	130	*	10.4	+	Intron (uc002cpr.3/1632, intron 3 of 6)	16	2289873	2301602	11730	2	1632	uc002cpr.3	6855	ENSG00000167969	ECI1	enoyl-CoA delta isomerase 1	FALSE	FALSE	FALSE	TRUE	FALSE	FALSE
20200205_TTNGFP_D4_GATA6ChIP_001_peak_10657	chr16	2296383	2296635	253	*	22.6	+	Intron (uc002cpr.3/1632, intron 3 of 6)	16	2289873	2301602	11730	2	1632	uc002cpr.3	4967	ENSG00000167969	ECI1	enoyl-CoA delta isomerase 1	FALSE	FALSE	FALSE	TRUE	FALSE	FALSE
20200205_TTNGFP_D4_GATA6ChIP_001_peak_10658	chr16	2301993	2302181	189	*	18.8	+	Promoter (<=1kb)	16	2289873	2301602	11730	2	1632	uc002cps.3	-391	ENSG00000167969	ECI1	enoyl-CoA delta isomerase 1	FALSE	FALSE	FALSE	TRUE	FALSE	FALSE
20200205_TTNGFP_D4_GATA6ChIP_001_peak_10659	chr16	2320132	2320248	117	*	10.4	+	Promoter (<=1kb)	16	2320714	2320773	60	1	100500812	uc021tas.1	-466	ENSG00000266643	MIR3677	microRNA 3677	FALSE	FALSE	FALSE	FALSE	FALSE	FALSE
20200205_TTNGFP_D4_GATA6ChIP_001_peak_1066	chr1	17262036	17262224	189	*	15.1	+	Promoter (4-5kb)	1	17266389	17299474	33086	1	9696	uc001azu.2	-4165	ENSG00000058453	CROCC	ciliary rootlet coiled-coil, rootletin	FALSE	FALSE	FALSE	FALSE	FALSE	FALSE
20200205_TTNGFP_D4_GATA6ChIP_001_peak_10660	chr16	2322315	2322434	120	*	11.8	+	Promoter (<=1kb)	16	2321748	2321841	94	1	100126328	uc021tat.1	567	ENSG00000284346	MIR940	microRNA 940	FALSE	FALSE	FALSE	FALSE	FALSE	FALSE
20200205_TTNGFP_D4_GATA6ChIP_001_peak_10662	chr16	2326720	2326945	226	*	17.1	+	Promoter (2-3kb)	16	2324621	2324692	72	1	100616241	uc021tau.1	2099	ENSG00000264004	MIR4717	microRNA 4717	FALSE	FALSE	FALSE	FALSE	FALSE	FALSE
20200205_TTNGFP_D4_GATA6ChIP_001_peak_10664	chr16	2333556	2333725	170	*	17.7	+	Intron (uc002cpy.1/21, intron 25 of 32)	16	2324621	2324692	72	1	100616241	uc021tau.1	8935	ENSG00000264004	MIR4717	microRNA 4717	FALSE	FALSE	FALSE	FALSE	FALSE	FALSE
20200205_TTNGFP_D4_GATA6ChIP_001_peak_10665	chr16	2334283	2334590	308	*	26	+	Exon (uc002cpy.1/21, exon 25 of 33)	16	2324621	2324692	72	1	100616241	uc021tau.1	9662	ENSG00000264004	MIR4717	microRNA 4717	FALSE	FALSE	FALSE	FALSE	FALSE	FALSE
20200205_TTNGFP_D4_GATA6ChIP_001_peak_10666	chr16	2334777	2334917	141	*	13.8	+	Exon (uc002cpy.1/21, exon 24 of 33)	16	2324621	2324692	72	1	100616241	uc021tau.1	10156	ENSG00000264004	MIR4717	microRNA 4717	FALSE	FALSE	FALSE	FALSE	FALSE	FALSE
20200205_TTNGFP_D4_GATA6ChIP_001_peak_10667	chr16	2335175	2335488	314	*	21.8	+	Exon (uc002cpy.1/21, exon 23 of 33)	16	2324621	2324692	72	1	100616241	uc021tau.1	10554	ENSG00000264004	MIR4717	microRNA 4717	FALSE	FALSE	FALSE	FALSE	FALSE	FALSE
20200205_TTNGFP_D4_GATA6ChIP_001_peak_10668	chr16	2336902	2337047	146	*	15	+	Exon (uc002cpy.1/21, exon 22 of 33)	16	2324621	2324692	72	1	100616241	uc021tau.1	12281	ENSG00000264004	MIR4717	microRNA 4717	FALSE	FALSE	FALSE	FALSE	FALSE	FALSE
20200205_TTNGFP_D4_GATA6ChIP_001_peak_1067	chr1	17263080	17263275	196	*	28	+	Promoter (3-4kb)	1	17266389	17299474	33086	1	9696	uc001azu.2	-3114	ENSG00000058453	CROCC	ciliary rootlet coiled-coil, rootletin	FALSE	FALSE	FALSE	FALSE	FALSE	FALSE
20200205_TTNGFP_D4_GATA6ChIP_001_peak_10670	chr16	2508914	2509098	185	*	13.2	+	Promoter (1-2kb)	16	2510115	2514964	4850	1	80178	uc002cqg.2	-1017	ENSG00000162062	TEDC2	tubulin epsilon and delta complex 2	FALSE	FALSE	FALSE	FALSE	FALSE	FALSE
20200205_TTNGFP_D4_GATA6ChIP_001_peak_10671	chr16	2512594	2513040	447	*	30.7	+	Promoter (1-2kb)	16	2511055	2514964	3910	1	80178	uc031qur.1	1539	ENSG00000162062	TEDC2	tubulin epsilon and delta complex 2	FALSE	FALSE	FALSE	FALSE	FALSE	FALSE
20200205_TTNGFP_D4_GATA6ChIP_001_peak_10673	chr16	2540405	2540547	143	*	15.7	+	Promoter (5-6kb)	16	2546035	2570224	24190	1	57465	uc002cqm.3	-5488	ENSG00000162065	TBC1D24	TBC1 domain family member 24	FALSE	FALSE	FALSE	FALSE	FALSE	FALSE
20200205_TTNGFP_D4_GATA6ChIP_001_peak_10675	chr16	2547376	2547566	191	*	17.4	+	Promoter (<=1kb)	16	2548239	2555734	7496	1	57465	uc010bsm.3	-673	ENSG00000162065	TBC1D24	TBC1 domain family member 24	FALSE	FALSE	FALSE	FALSE	FALSE	FALSE
20200205_TTNGFP_D4_GATA6ChIP_001_peak_10677	chr16	2562874	2562998	125	*	17.3	+	Promoter (<=1kb)	16	2563727	2570224	6498	1	527	uc021tav.1	-729	ENSG00000185883	ATP6V0C	ATPase H+ transporting V0 subunit c	FALSE	FALSE	FALSE	FALSE	FALSE	FALSE
20200205_TTNGFP_D4_GATA6ChIP_001_peak_10679	chr16	2635559	2635816	258	*	15.3	+	Intron (uc002cqs.4/5170, intron 10 of 13)	16	2653385	2667132	13748	1	652276	uc002cqx.3	-17569	ENSG00000215154	LOC652276	potassium channel tetramerization domain containing 5 pseudogene	FALSE	FALSE	FALSE	FALSE	FALSE	FALSE
20200205_TTNGFP_D4_GATA6ChIP_001_peak_1068	chr1	17264540	17265437	898	*	73.7	+	Promoter (<=1kb)	1	17266389	17299474	33086	1	9696	uc001azu.2	-952	ENSG00000058453	CROCC	ciliary rootlet coiled-coil, rootletin	TRUE	FALSE	FALSE	FALSE	FALSE	FALSE
20200205_TTNGFP_D4_GATA6ChIP_001_peak_10680	chr16	2643571	2643687	117	*	14.7	+	Promoter (9-10kb)	16	2653385	2667132	13748	1	652276	uc002cqx.3	-9698	ENSG00000215154	LOC652276	potassium channel tetramerization domain containing 5 pseudogene	FALSE	FALSE	FALSE	FALSE	FALSE	TRUE
20200205_TTNGFP_D4_GATA6ChIP_001_peak_10681	chr16	2645987	2646131	145	*	14.5	+	Promoter (7-8kb)	16	2653385	2667132	13748	1	652276	uc002cqx.3	-7254	ENSG00000215154	LOC652276	potassium channel tetramerization domain containing 5 pseudogene	FALSE	FALSE	FALSE	FALSE	FALSE	FALSE
20200205_TTNGFP_D4_GATA6ChIP_001_peak_10682	chr16	2724883	2725000	118	*	8.8	+	Promoter (1-2kb)	16	2710870	2723440	12571	2	100507321	uc002crb.3	-1443	NA	ERVK13-1	endogenous retrovirus group K13 member 1	FALSE	FALSE	FALSE	FALSE	FALSE	FALSE
20200205_TTNGFP_D4_GATA6ChIP_001_peak_10683	chr16	2741378	2741505	128	*	11.7	+	Intron (uc002crd.3/54442, intron 1 of 5)	16	2732495	2759031	26537	1	54442	uc002crd.3	8883	ENSG00000167977	KCTD5	potassium channel tetramerization domain containing 5	FALSE	FALSE	FALSE	FALSE	FALSE	FALSE
20200205_TTNGFP_D4_GATA6ChIP_001_peak_10684	chr16	2748764	2749199	436	*	33.3	+	Intron (uc002crd.3/54442, intron 3 of 5)	16	2732495	2759031	26537	1	54442	uc002crd.3	16269	ENSG00000167977	KCTD5	potassium channel tetramerization domain containing 5	FALSE	FALSE	FALSE	FALSE	FALSE	FALSE
20200205_TTNGFP_D4_GATA6ChIP_001_peak_10686	chr16	2755839	2756280	442	*	38.1	+	Intron (uc002crd.3/54442, intron 5 of 5)	16	2762423	2765566	3144	2	83886	uc002cre.3	9286	ENSG00000172382	PRSS27	serine protease 27	FALSE	FALSE	FALSE	FALSE	FALSE	FALSE
20200205_TTNGFP_D4_GATA6ChIP_001_peak_10687	chr16	2757581	2757770	190	*	11.5	+	3' UTR	16	2762423	2765566	3144	2	83886	uc002cre.3	7796	ENSG00000172382	PRSS27	serine protease 27	FALSE	FALSE	FALSE	FALSE	FALSE	FALSE
20200205_TTNGFP_D4_GATA6ChIP_001_peak_10689	chr16	2803267	2803470	204	*	12.9	+	Promoter (<=1kb)	16	2802627	2818262	15636	1	23524	uc010bsu.1	640	ENSG00000167978	SRRM2	serine/arginine repetitive matrix 2	FALSE	FALSE	FALSE	FALSE	FALSE	FALSE
20200205_TTNGFP_D4_GATA6ChIP_001_peak_1069	chr1	17266104	17266224	121	*	15.3	+	Promoter (<=1kb)	1	17266389	17299474	33086	1	9696	uc001azu.2	-165	ENSG00000058453	CROCC	ciliary rootlet coiled-coil, rootletin	FALSE	FALSE	FALSE	FALSE	FALSE	TRUE
20200205_TTNGFP_D4_GATA6ChIP_001_peak_10690	chr16	2834090	2834256	167	*	15.4	+	Promoter (2-3kb)	16	2833954	2836708	2755	2	260429	uc002cro.1	2452	ENSG00000103355	PRSS33	serine protease 33	FALSE	FALSE	FALSE	FALSE	FALSE	FALSE
20200205_TTNGFP_D4_GATA6ChIP_001_peak_10691	chr16	2835142	2835375	234	*	19.7	+	Promoter (1-2kb)	16	2833954	2836708	2755	2	260429	uc002cro.1	1333	ENSG00000103355	PRSS33	serine protease 33	FALSE	FALSE	FALSE	FALSE	FALSE	FALSE
20200205_TTNGFP_D4_GATA6ChIP_001_peak_10694	chr16	2877369	2877536	168	*	9.2	+	Promoter (2-3kb)	16	2880173	2882285	2113	1	124220	uc002cru.3	-2637	ENSG00000162078	ZG16B	zymogen granule protein 16B	FALSE	FALSE	FALSE	FALSE	FALSE	FALSE
20200205_TTNGFP_D4_GATA6ChIP_001_peak_10695	chr16	2878803	2879805	1003	*	63.7	+	Promoter (<=1kb)	16	2880173	2882285	2113	1	124220	uc002cru.3	-368	ENSG00000162078	ZG16B	zymogen granule protein 16B	TRUE	FALSE	FALSE	FALSE	FALSE	FALSE
20200205_TTNGFP_D4_GATA6ChIP_001_peak_10696	chr16	2880183	2880480	298	*	18	+	Promoter (<=1kb)	16	2880173	2882285	2113	1	124220	uc002cru.3	10	ENSG00000162078	ZG16B	zymogen granule protein 16B	FALSE	FALSE	FALSE	FALSE	FALSE	FALSE
20200205_TTNGFP_D4_GATA6ChIP_001_peak_10697	chr16	2882413	2882582	170	*	13.3	+	Promoter (2-3kb)	16	2880173	2882285	2113	1	124220	uc002cru.3	2240	ENSG00000162078	ZG16B	zymogen granule protein 16B	FALSE	FALSE	FALSE	FALSE	FALSE	FALSE
20200205_TTNGFP_D4_GATA6ChIP_001_peak_10699	chr16	2903720	2903928	209	*	16	+	Exon (uc002cry.1/64063, exon 5 of 6)	16	2902728	2908171	5444	2	64063	uc002cry.1	4243	ENSG00000005001	PRSS22	serine protease 22	FALSE	FALSE	TRUE	FALSE	FALSE	FALSE
20200205_TTNGFP_D4_GATA6ChIP_001_peak_1070	chr1	17266847	17266974	128	*	15	+	Promoter (<=1kb)	1	17266389	17299474	33086	1	9696	uc001azu.2	458	ENSG00000058453	CROCC	ciliary rootlet coiled-coil, rootletin	FALSE	FALSE	FALSE	FALSE	FALSE	FALSE
20200205_TTNGFP_D4_GATA6ChIP_001_peak_10700	chr16	2910200	2910425	226	*	12.7	+	Promoter (2-3kb)	16	2902728	2908171	5444	2	64063	uc002cry.1	-2029	ENSG00000005001	PRSS22	serine protease 22	FALSE	FALSE	TRUE	FALSE	FALSE	FALSE
20200205_TTNGFP_D4_GATA6ChIP_001_peak_10702	chr16	2924535	2924657	123	*	11	+	Promoter (8-9kb)	16	2933196	2949383	16188	1	114984	uc002csa.3	-8539	ENSG00000162076	FLYWCH2	FLYWCH family member 2	FALSE	FALSE	FALSE	FALSE	FALSE	FALSE
20200205_TTNGFP_D4_GATA6ChIP_001_peak_10703	chr16	2944701	2945375	675	*	42.4	+	5' UTR	16	2933196	2949383	16188	1	114984	uc010uwk.2	11505	ENSG00000162076	FLYWCH2	FLYWCH family member 2	FALSE	FALSE	FALSE	FALSE	FALSE	FALSE
20200205_TTNGFP_D4_GATA6ChIP_001_peak_10704	chr16	2955183	2955440	258	*	8	+	Promoter (6-7kb)	16	2961980	2990158	28179	1	84256	uc002csb.3	-6540	ENSG00000059122	FLYWCH1	FLYWCH-type zinc finger 1	FALSE	FALSE	FALSE	FALSE	TRUE	TRUE
20200205_TTNGFP_D4_GATA6ChIP_001_peak_10707	chr16	2987470	2987734	265	*	28.9	+	Promoter (<=1kb)	16	2987075	3001209	14135	1	84256	uc002cse.3	395	ENSG00000059122	FLYWCH1	FLYWCH-type zinc finger 1	FALSE	FALSE	FALSE	FALSE	FALSE	FALSE
20200205_TTNGFP_D4_GATA6ChIP_001_peak_10708	chr16	2987864	2988215	352	*	21.5	+	Promoter (<=1kb)	16	2987075	3001209	14135	1	84256	uc002cse.3	789	ENSG00000059122	FLYWCH1	FLYWCH-type zinc finger 1	FALSE	FALSE	FALSE	FALSE	FALSE	FALSE
20200205_TTNGFP_D4_GATA6ChIP_001_peak_10710	chr16	3038634	3038782	149	*	15.1	+	Promoter (<=1kb)	16	3039055	3044510	5456	1	283875	uc002csr.2	-273	NA	LINC00514	long intergenic non-protein coding RNA 514	FALSE	FALSE	FALSE	FALSE	FALSE	FALSE
20200205_TTNGFP_D4_GATA6ChIP_001_peak_10711	chr16	3048268	3048390	123	*	10.1	+	Distal Intergenic	16	3040195	3044510	4316	1	283875	uc002css.1	8073	NA	LINC00514	long intergenic non-protein coding RNA 514	FALSE	FALSE	FALSE	FALSE	FALSE	FALSE
20200205_TTNGFP_D4_GATA6ChIP_001_peak_10712	chr16	3054892	3055326	435	*	31.8	+	Promoter (7-8kb)	16	3062457	3064506	2050	1	9080	uc010uwo.1	-7131	ENSG00000213937	CLDN9	claudin 9	TRUE	FALSE	FALSE	FALSE	FALSE	FALSE
20200205_TTNGFP_D4_GATA6ChIP_001_peak_10713	chr16	3059757	3060222	466	*	35.3	+	Promoter (2-3kb)	16	3062457	3064506	2050	1	9080	uc010uwo.1	-2235	ENSG00000213937	CLDN9	claudin 9	FALSE	FALSE	FALSE	FALSE	TRUE	TRUE
20200205_TTNGFP_D4_GATA6ChIP_001_peak_10714	chr16	3067554	3067734	181	*	13.5	+	Promoter (<=1kb)	16	3064713	3068188	3476	2	9074	uc002csu.4	454	ENSG00000184697	CLDN6	claudin 6	FALSE	FALSE	FALSE	TRUE	FALSE	FALSE
20200205_TTNGFP_D4_GATA6ChIP_001_peak_10715	chr16	3067963	3068375	413	*	54	+	Promoter (<=1kb)	16	3064713	3068188	3476	2	9074	uc002csu.4	0	ENSG00000184697	CLDN6	claudin 6	TRUE	FALSE	FALSE	TRUE	TRUE	TRUE
20200205_TTNGFP_D4_GATA6ChIP_001_peak_10716	chr16	3075550	3075673	124	*	15.3	+	Promoter (1-2kb)	16	3072626	3074287	1662	2	54985	uc002csz.1	-1263	ENSG00000103145	HCFC1R1	host cell factor C1 regulator 1	FALSE	FALSE	FALSE	TRUE	FALSE	FALSE
20200205_TTNGFP_D4_GATA6ChIP_001_peak_10717	chr16	3080135	3080382	248	*	10.7	+	Promoter (<=1kb)	16	3079971	3081151	1181	2	146439	uc010bta.1	769	ENSG00000162069	BICDL2	BICD family like cargo adaptor 2	FALSE	FALSE	FALSE	TRUE	FALSE	FALSE
20200205_TTNGFP_D4_GATA6ChIP_001_peak_10718	chr16	3115877	3116021	145	*	12	+	Promoter (<=1kb)	16	3115785	3119668	3884	1	9235	uc021tbc.1	92	ENSG00000008517	IL32	interleukin 32	FALSE	FALSE	TRUE	FALSE	FALSE	FALSE
20200205_TTNGFP_D4_GATA6ChIP_001_peak_1072	chr1	17273379	17273520	142	*	16.5	+	Exon (uc001azt.2/9696, exon 17 of 37)	1	17266389	17299474	33086	1	9696	uc001azu.2	6990	ENSG00000058453	CROCC	ciliary rootlet coiled-coil, rootletin	FALSE	FALSE	FALSE	FALSE	FALSE	FALSE
20200205_TTNGFP_D4_GATA6ChIP_001_peak_10721	chr16	3188367	3188500	134	*	12.4	+	Promoter (1-2kb)	16	3187167	3192805	5639	1	7760	uc010uwt.3	1200	ENSG00000085644	ZNF213	zinc finger protein 213	FALSE	FALSE	FALSE	TRUE	FALSE	FALSE
20200205_TTNGFP_D4_GATA6ChIP_001_peak_10722	chr16	3191782	3191976	195	*	16	+	3' UTR	16	3187167	3192805	5639	1	7760	uc010uwt.3	4615	ENSG00000085644	ZNF213	zinc finger protein 213	FALSE	FALSE	FALSE	TRUE	FALSE	FALSE
20200205_TTNGFP_D4_GATA6ChIP_001_peak_10724	chr16	3221836	3221975	140	*	18.9	+	Distal Intergenic	16	3254247	3255185	939	1	4992	uc010uwu.2	-32272	ENSG00000168124	OR1F1	olfactory receptor family 1 subfamily F member 1	FALSE	FALSE	FALSE	FALSE	TRUE	FALSE
20200205_TTNGFP_D4_GATA6ChIP_001_peak_10726	chr16	3242629	3242818	190	*	18	+	Distal Intergenic	16	3254247	3255185	939	1	4992	uc010uwu.2	-11429	ENSG00000168124	OR1F1	olfactory receptor family 1 subfamily F member 1	FALSE	FALSE	FALSE	FALSE	FALSE	FALSE
20200205_TTNGFP_D4_GATA6ChIP_001_peak_10728	chr16	3313448	3313867	420	*	31.3	+	Promoter (<=1kb)	16	3313800	3341459	27660	1	10127	uc010uww.2	0	ENSG00000006194	ZNF263	zinc finger protein 263	FALSE	FALSE	FALSE	FALSE	FALSE	FALSE
20200205_TTNGFP_D4_GATA6ChIP_001_peak_1073	chr1	17274955	17275146	192	*	24.7	+	Exon (uc001azt.2/9696, exon 18 of 37)	1	17266389	17299474	33086	1	9696	uc001azu.2	8566	ENSG00000058453	CROCC	ciliary rootlet coiled-coil, rootletin	FALSE	FALSE	FALSE	FALSE	FALSE	FALSE
20200205_TTNGFP_D4_GATA6ChIP_001_peak_10738	chr16	3633056	3633417	362	*	25.1	+	Promoter (5-6kb)	16	3589036	3627392	38357	2	197358	uc010btn.3	-5664	ENSG00000167984	NLRC3	NLR family CARD domain containing 3	FALSE	FALSE	FALSE	FALSE	FALSE	FALSE
20200205_TTNGFP_D4_GATA6ChIP_001_peak_1074	chr1	17279915	17280072	158	*	10.4	+	Exon (uc001azt.2/9696, exon 21 of 37)	1	17266389	17299474	33086	1	9696	uc001azu.2	13526	ENSG00000058453	CROCC	ciliary rootlet coiled-coil, rootletin	FALSE	FALSE	FALSE	FALSE	FALSE	FALSE
20200205_TTNGFP_D4_GATA6ChIP_001_peak_10740	chr16	3702156	3702357	202	*	18	+	Promoter (<=1kb)	16	3702940	3708096	5157	1	1773	uc002cvr.3	-583	ENSG00000213918	DNASE1	deoxyribonuclease 1	FALSE	FALSE	FALSE	FALSE	FALSE	FALSE
20200205_TTNGFP_D4_GATA6ChIP_001_peak_10741	chr16	3705420	3705964	545	*	30.7	+	Promoter (2-3kb)	16	3702940	3708096	5157	1	1773	uc002cvr.3	2480	ENSG00000213918	DNASE1	deoxyribonuclease 1	FALSE	FALSE	FALSE	FALSE	FALSE	FALSE
20200205_TTNGFP_D4_GATA6ChIP_001_peak_10742	chr16	3724589	3724735	147	*	14.4	+	Intron (uc002cvs.3/10131, intron 3 of 12)	16	3708038	3728305	20268	2	10131	uc002cvs.3	3570	ENSG00000126602	TRAP1	TNF receptor associated protein 1	FALSE	FALSE	FALSE	FALSE	FALSE	FALSE
20200205_TTNGFP_D4_GATA6ChIP_001_peak_10743	chr16	3778351	3778864	514	*	30.3	+	Exon (uc002cvv.3/1387, exon 31 of 31)	16	3708038	3767598	59561	2	10131	uc010uxf.2	-10753	ENSG00000126602	TRAP1	TNF receptor associated protein 1	FALSE	FALSE	FALSE	FALSE	FALSE	FALSE
20200205_TTNGFP_D4_GATA6ChIP_001_peak_10744	chr16	3779920	3780130	211	*	20	+	Intron (uc002cvv.3/1387, intron 30 of 30)	16	3708038	3767598	59561	2	10131	uc010uxf.2	-12322	ENSG00000126602	TRAP1	TNF receptor associated protein 1	FALSE	FALSE	FALSE	FALSE	FALSE	FALSE
20200205_TTNGFP_D4_GATA6ChIP_001_peak_10745	chr16	3784508	3784736	229	*	19.1	+	Intron (uc002cvv.3/1387, intron 28 of 30)	16	3708038	3767598	59561	2	10131	uc010uxf.2	-16910	ENSG00000126602	TRAP1	TNF receptor associated protein 1	FALSE	FALSE	FALSE	FALSE	FALSE	FALSE
20200205_TTNGFP_D4_GATA6ChIP_001_peak_10746	chr16	3823743	3823885	143	*	16	+	Exon (uc002cvv.3/1387, exon 13 of 31)	16	3708038	3767598	59561	2	10131	uc010uxf.2	-56145	ENSG00000126602	TRAP1	TNF receptor associated protein 1	FALSE	FALSE	FALSE	FALSE	FALSE	FALSE
20200205_TTNGFP_D4_GATA6ChIP_001_peak_10747	chr16	3996980	3997115	136	*	12.7	+	Distal Intergenic	16	3775056	3930121	155066	2	1387	uc002cvw.3	-66859	ENSG00000005339	CREBBP	CREB binding protein	FALSE	FALSE	FALSE	FALSE	FALSE	FALSE
20200205_TTNGFP_D4_GATA6ChIP_001_peak_10748	chr16	3999343	3999489	147	*	16.8	+	Distal Intergenic	16	3775056	3930121	155066	2	1387	uc002cvw.3	-69222	ENSG00000005339	CREBBP	CREB binding protein	FALSE	FALSE	FALSE	FALSE	FALSE	FALSE
20200205_TTNGFP_D4_GATA6ChIP_001_peak_10749	chr16	4015033	4015213	181	*	21.5	+	3' UTR	16	3775056	3930121	155066	2	1387	uc002cvw.3	-84912	ENSG00000005339	CREBBP	CREB binding protein	FALSE	FALSE	FALSE	FALSE	FALSE	FALSE
20200205_TTNGFP_D4_GATA6ChIP_001_peak_1075	chr1	17281728	17281906	179	*	12.3	+	Exon (uc001azt.2/9696, exon 24 of 37)	1	17294698	17299474	4777	1	9696	uc001azv.2	-12792	ENSG00000058453	CROCC	ciliary rootlet coiled-coil, rootletin	FALSE	FALSE	FALSE	FALSE	FALSE	FALSE
20200205_TTNGFP_D4_GATA6ChIP_001_peak_10750	chr16	4020717	4020836	120	*	15	+	Intron (uc002cvx.3/115, intron 10 of 10)	16	3775056	3930121	155066	2	1387	uc002cvw.3	-90596	ENSG00000005339	CREBBP	CREB binding protein	FALSE	FALSE	FALSE	FALSE	FALSE	FALSE
20200205_TTNGFP_D4_GATA6ChIP_001_peak_10751	chr16	4029627	4029877	251	*	15.7	+	Intron (uc002cvx.3/115, intron 7 of 10)	16	3775056	3930121	155066	2	1387	uc002cvw.3	-99506	ENSG00000005339	CREBBP	CREB binding protein	FALSE	FALSE	FALSE	FALSE	FALSE	FALSE
20200205_TTNGFP_D4_GATA6ChIP_001_peak_10752	chr16	4047383	4047651	269	*	28.3	+	Intron (uc002cvx.3/115, intron 3 of 10)	16	3775056	3930121	155066	2	1387	uc002cvw.3	-117262	ENSG00000005339	CREBBP	CREB binding protein	TRUE	FALSE	FALSE	FALSE	TRUE	TRUE
20200205_TTNGFP_D4_GATA6ChIP_001_peak_10754	chr16	4257380	4257549	170	*	14.7	+	Exon (uc002cvy.4/6345, exon 2 of 7)	16	4239375	4292081	52707	2	6345	uc002cvy.4	34532	ENSG00000185739	SRL	sarcalumenin	FALSE	FALSE	FALSE	FALSE	FALSE	FALSE
20200205_TTNGFP_D4_GATA6ChIP_001_peak_10756	chr16	4282868	4283038	171	*	11.4	+	Intron (uc002cvy.4/6345, intron 1 of 6)	16	4239375	4292081	52707	2	6345	uc002cvy.4	9043	ENSG00000185739	SRL	sarcalumenin	FALSE	FALSE	FALSE	FALSE	FALSE	FALSE
20200205_TTNGFP_D4_GATA6ChIP_001_peak_10757	chr16	4314396	4314658	263	*	21.2	+	Intron (uc010uxg.2/7023, intron 1 of 6)	16	4307187	4323001	15815	2	7023	uc010uxg.2	8343	ENSG00000090447	TFAP4	transcription factor AP-4	FALSE	FALSE	FALSE	FALSE	FALSE	FALSE
20200205_TTNGFP_D4_GATA6ChIP_001_peak_10758	chr16	4335089	4335301	213	*	20.4	+	Distal Intergenic	16	4307187	4323001	15815	2	7023	uc010uxg.2	-12088	ENSG00000090447	TFAP4	transcription factor AP-4	TRUE	FALSE	FALSE	FALSE	FALSE	FALSE
20200205_TTNGFP_D4_GATA6ChIP_001_peak_1076	chr1	17295963	17296485	523	*	38.3	+	Promoter (1-2kb)	1	17294698	17299474	4777	1	9696	uc001azv.2	1265	ENSG00000058453	CROCC	ciliary rootlet coiled-coil, rootletin	TRUE	FALSE	FALSE	FALSE	FALSE	FALSE
20200205_TTNGFP_D4_GATA6ChIP_001_peak_10761	chr16	4383030	4383175	146	*	17	+	Promoter (<=1kb)	16	4382216	4389598	7383	1	84662	uc002cwc.1	814	ENSG00000126603	GLIS2	GLIS family zinc finger 2	FALSE	FALSE	FALSE	FALSE	FALSE	FALSE
20200205_TTNGFP_D4_GATA6ChIP_001_peak_10762	chr16	4387537	4388004	468	*	22.7	+	3' UTR	16	4382216	4389598	7383	1	84662	uc002cwc.1	5321	ENSG00000126603	GLIS2	GLIS family zinc finger 2	FALSE	FALSE	FALSE	FALSE	FALSE	FALSE
20200205_TTNGFP_D4_GATA6ChIP_001_peak_10765	chr16	4390994	4391196	203	*	20.4	+	Intron (uc002cwd.3/51025, intron 3 of 4)	16	4382216	4389598	7383	1	84662	uc002cwc.1	8778	ENSG00000126603	GLIS2	GLIS family zinc finger 2	FALSE	FALSE	FALSE	FALSE	FALSE	FALSE
20200205_TTNGFP_D4_GATA6ChIP_001_peak_10766	chr16	4391368	4391699	332	*	18.9	+	Exon (uc002cwd.3/51025, exon 3 of 5)	16	4382216	4389598	7383	1	84662	uc002cwc.1	9152	ENSG00000126603	GLIS2	GLIS family zinc finger 2	FALSE	FALSE	FALSE	FALSE	FALSE	FALSE
20200205_TTNGFP_D4_GATA6ChIP_001_peak_10768	chr16	4416325	4416446	122	*	12.4	+	Promoter (5-6kb)	16	4421849	4433529	11681	1	114990	uc002cwj.1	-5403	ENSG00000168140	VASN	vasorin	FALSE	FALSE	FALSE	FALSE	FALSE	FALSE
20200205_TTNGFP_D4_GATA6ChIP_001_peak_10769	chr16	4419423	4419637	215	*	18.6	+	Promoter (2-3kb)	16	4421849	4433529	11681	1	114990	uc002cwj.1	-2212	ENSG00000168140	VASN	vasorin	FALSE	FALSE	FALSE	FALSE	FALSE	FALSE
20200205_TTNGFP_D4_GATA6ChIP_001_peak_1077	chr1	17297157	17297322	166	*	20.1	+	Promoter (2-3kb)	1	17294698	17299474	4777	1	9696	uc001azv.2	2459	ENSG00000058453	CROCC	ciliary rootlet coiled-coil, rootletin	FALSE	FALSE	FALSE	FALSE	FALSE	FALSE
20200205_TTNGFP_D4_GATA6ChIP_001_peak_10770	chr16	4423219	4423361	143	*	15.4	+	Promoter (1-2kb)	16	4421849	4433529	11681	1	114990	uc002cwj.1	1370	ENSG00000168140	VASN	vasorin	TRUE	FALSE	FALSE	FALSE	FALSE	FALSE
20200205_TTNGFP_D4_GATA6ChIP_001_peak_10771	chr16	4424419	4424621	203	*	11.4	+	Promoter (2-3kb)	16	4421849	4433529	11681	1	114990	uc002cwj.1	2570	ENSG00000168140	VASN	vasorin	FALSE	FALSE	FALSE	FALSE	FALSE	FALSE
20200205_TTNGFP_D4_GATA6ChIP_001_peak_10775	chr16	4438983	4439132	150	*	19.5	+	Intron (uc002cwe.3/100529144, intron 3 of 27)	16	4421849	4433529	11681	1	114990	uc002cwj.1	17134	ENSG00000168140	VASN	vasorin	FALSE	FALSE	FALSE	FALSE	FALSE	FALSE
20200205_TTNGFP_D4_GATA6ChIP_001_peak_10776	chr16	4448467	4448604	138	*	11.8	+	Intron (uc002cwe.3/100529144, intron 2 of 27)	16	4390252	4457685	67434	2	100529144	uc002cwe.3	9081	ENSG00000103426	CORO7-PAM16	CORO7-PAM16 readthrough	FALSE	FALSE	FALSE	FALSE	FALSE	FALSE
20200205_TTNGFP_D4_GATA6ChIP_001_peak_10777	chr16	4451699	4451823	125	*	15.4	+	Intron (uc002cwe.3/100529144, intron 2 of 27)	16	4390252	4457685	67434	2	100529144	uc002cwe.3	5862	ENSG00000103426	CORO7-PAM16	CORO7-PAM16 readthrough	FALSE	FALSE	FALSE	FALSE	FALSE	FALSE
20200205_TTNGFP_D4_GATA6ChIP_001_peak_1078	chr1	17298001	17298267	267	*	20.7	+	Exon (uc001azt.2/9696, exon 36 of 37)	1	17294698	17299474	4777	1	9696	uc001azv.2	3303	ENSG00000058453	CROCC	ciliary rootlet coiled-coil, rootletin	FALSE	FALSE	FALSE	FALSE	FALSE	FALSE
20200205_TTNGFP_D4_GATA6ChIP_001_peak_10782	chr16	4516510	4516627	118	*	23	+	Intron (uc002cwm.3/57407, intron 3 of 5)	16	4511695	4524532	12838	2	57407	uc002cwm.3	7905	ENSG00000153406	NMRAL1	NmrA like redox sensor 1	FALSE	FALSE	FALSE	FALSE	FALSE	FALSE
20200205_TTNGFP_D4_GATA6ChIP_001_peak_10783	chr16	4526968	4527131	164	*	18	+	Promoter (<=1kb)	16	4526341	4560348	34008	1	3163	uc002cwr.4	627	ENSG00000103415	HMOX2	heme oxygenase 2	TRUE	FALSE	FALSE	FALSE	FALSE	FALSE
20200205_TTNGFP_D4_GATA6ChIP_001_peak_10784	chr16	4560030	4560179	150	*	19.1	+	3' UTR	16	4560677	4564856	4180	2	29965	uc002cwu.3	4677	ENSG00000089486	CDIP1	cell death inducing p53 target 1	FALSE	FALSE	FALSE	FALSE	FALSE	FALSE
20200205_TTNGFP_D4_GATA6ChIP_001_peak_10785	chr16	4629199	4629371	173	*	12.7	+	Intron (uc010uxn.2/342346, intron 6 of 15)	16	4606491	4650318	43828	1	342346	uc010uxn.2	22708	ENSG00000205832	C16orf96	chromosome 16 open reading frame 96	FALSE	FALSE	FALSE	TRUE	FALSE	FALSE
20200205_TTNGFP_D4_GATA6ChIP_001_peak_10786	chr16	4645200	4645324	125	*	13.5	+	Intron (uc010uxn.2/342346, intron 14 of 15)	16	4658884	4664927	6044	2	124402	uc002cwx.2	19603	ENSG00000153443	UBALD1	UBA like domain containing 1	FALSE	FALSE	FALSE	FALSE	FALSE	FALSE
20200205_TTNGFP_D4_GATA6ChIP_001_peak_10788	chr16	4696893	4697024	132	*	11.5	+	Intron (uc002cwz.3/23295, intron 1 of 16)	16	4674825	4740975	66151	1	23295	uc010uxq.2	22068	ENSG00000102858	MGRN1	mahogunin ring finger 1	FALSE	FALSE	FALSE	FALSE	FALSE	FALSE
20200205_TTNGFP_D4_GATA6ChIP_001_peak_10789	chr16	4702191	4702398	208	*	21.8	+	Intron (uc002cwz.3/23295, intron 3 of 16)	16	4674825	4740975	66151	1	23295	uc010uxq.2	27366	ENSG00000102858	MGRN1	mahogunin ring finger 1	FALSE	FALSE	FALSE	FALSE	FALSE	FALSE
20200205_TTNGFP_D4_GATA6ChIP_001_peak_1079	chr1	17303456	17303783	328	*	24.2	+	Exon (uc001azw.3/4237, exon 3 of 9)	1	17300999	17307173	6175	2	4237	uc001azw.3	3390	ENSG00000117122	MFAP2	microfibril associated protein 2	FALSE	FALSE	FALSE	FALSE	FALSE	FALSE
20200205_TTNGFP_D4_GATA6ChIP_001_peak_10790	chr16	4705507	4705691	185	*	16.2	+	Intron (uc002cwz.3/23295, intron 4 of 16)	16	4674825	4740975	66151	1	23295	uc010uxq.2	30682	ENSG00000102858	MGRN1	mahogunin ring finger 1	FALSE	FALSE	FALSE	FALSE	FALSE	FALSE
20200205_TTNGFP_D4_GATA6ChIP_001_peak_10791	chr16	4705813	4706091	279	*	25.6	+	Intron (uc002cwz.3/23295, intron 4 of 16)	16	4674825	4740975	66151	1	23295	uc010uxq.2	30988	ENSG00000102858	MGRN1	mahogunin ring finger 1	FALSE	FALSE	FALSE	FALSE	FALSE	FALSE
20200205_TTNGFP_D4_GATA6ChIP_001_peak_10792	chr16	4715031	4715170	140	*	15.1	+	Exon (uc002cwz.3/23295, exon 7 of 17)	16	4743694	4745856	2163	1	84309	uc002cxf.2	-28524	ENSG00000168101	NUDT16L1	nudix hydrolase 16 like 1	FALSE	FALSE	FALSE	TRUE	FALSE	FALSE
20200205_TTNGFP_D4_GATA6ChIP_001_peak_10793	chr16	4716868	4716984	117	*	12.3	+	Intron (uc002cwz.3/23295, intron 7 of 16)	16	4743694	4745856	2163	1	84309	uc002cxf.2	-26710	ENSG00000168101	NUDT16L1	nudix hydrolase 16 like 1	FALSE	FALSE	FALSE	TRUE	FALSE	FALSE
20200205_TTNGFP_D4_GATA6ChIP_001_peak_10795	chr16	4721658	4721818	161	*	17.3	+	Intron (uc002cwz.3/23295, intron 9 of 16)	16	4743694	4745856	2163	1	84309	uc002cxf.2	-21876	ENSG00000168101	NUDT16L1	nudix hydrolase 16 like 1	FALSE	FALSE	FALSE	TRUE	FALSE	FALSE
20200205_TTNGFP_D4_GATA6ChIP_001_peak_10797	chr16	4731219	4731750	532	*	40.3	+	Exon (uc002cwz.3/23295, exon 13 of 17)	16	4743694	4745856	2163	1	84309	uc002cxf.2	-11944	ENSG00000168101	NUDT16L1	nudix hydrolase 16 like 1	FALSE	FALSE	FALSE	TRUE	FALSE	FALSE
20200205_TTNGFP_D4_GATA6ChIP_001_peak_10798	chr16	4732515	4732819	305	*	25	+	Intron (uc002cwz.3/23295, intron 13 of 16)	16	4743694	4745856	2163	1	84309	uc002cxf.2	-10875	ENSG00000168101	NUDT16L1	nudix hydrolase 16 like 1	FALSE	FALSE	FALSE	TRUE	FALSE	FALSE
20200205_TTNGFP_D4_GATA6ChIP_001_peak_10799	chr16	4735959	4736202	244	*	14.8	+	Promoter (7-8kb)	16	4743694	4745856	2163	1	84309	uc002cxf.2	-7492	ENSG00000168101	NUDT16L1	nudix hydrolase 16 like 1	FALSE	FALSE	FALSE	TRUE	FALSE	FALSE
20200205_TTNGFP_D4_GATA6ChIP_001_peak_108	chr1	1443433	1443778	346	*	24.5	+	Promoter (3-4kb)	1	1447523	1470067	22545	1	55210	uc001afz.2	-3745	ENSG00000197785	ATAD3A	ATPase family AAA domain containing 3A	FALSE	FALSE	FALSE	FALSE	FALSE	FALSE
20200205_TTNGFP_D4_GATA6ChIP_001_peak_10801	chr16	4739513	4739716	204	*	14.7	+	Promoter (3-4kb)	16	4743694	4745856	2163	1	84309	uc002cxf.2	-3978	ENSG00000168101	NUDT16L1	nudix hydrolase 16 like 1	FALSE	FALSE	FALSE	TRUE	FALSE	FALSE
20200205_TTNGFP_D4_GATA6ChIP_001_peak_10802	chr16	4741523	4741827	305	*	21.2	+	Promoter (1-2kb)	16	4743694	4745856	2163	1	84309	uc002cxf.2	-1867	ENSG00000168101	NUDT16L1	nudix hydrolase 16 like 1	FALSE	FALSE	FALSE	TRUE	FALSE	FALSE
20200205_TTNGFP_D4_GATA6ChIP_001_peak_10803	chr16	4746862	4747043	182	*	18	+	3' UTR	16	4743694	4745860	2167	1	84309	uc021tci.1	3168	ENSG00000168101	NUDT16L1	nudix hydrolase 16 like 1	FALSE	FALSE	FALSE	TRUE	FALSE	FALSE
20200205_TTNGFP_D4_GATA6ChIP_001_peak_10804	chr16	4748996	4749215	220	*	12.6	+	Promoter (1-2kb)	16	4746511	4750304	3794	2	124401	uc002cxh.2	1089	ENSG00000168096	ANKS3	ankyrin repeat and sterile alpha motif domain containing 3	FALSE	FALSE	FALSE	FALSE	FALSE	FALSE
20200205_TTNGFP_D4_GATA6ChIP_001_peak_10805	chr16	4752314	4752433	120	*	18.9	+	Promoter (2-3kb)	16	4746511	4750304	3794	2	124401	uc002cxh.2	-2010	ENSG00000168096	ANKS3	ankyrin repeat and sterile alpha motif domain containing 3	FALSE	FALSE	FALSE	FALSE	FALSE	FALSE
20200205_TTNGFP_D4_GATA6ChIP_001_peak_10806	chr16	4777042	4777184	143	*	25.1	+	Promoter (<=1kb)	16	4746511	4778079	31569	2	124401	uc002cxi.2	895	ENSG00000168096	ANKS3	ankyrin repeat and sterile alpha motif domain containing 3	FALSE	FALSE	FALSE	FALSE	FALSE	FALSE
20200205_TTNGFP_D4_GATA6ChIP_001_peak_10810	chr16	4803848	4804009	162	*	16.7	+	Intron (uc002cxo.1/26048, intron 4 of 4)	16	4800815	4816077	15263	2	26048	uc002cxo.1	12068	ENSG00000103199	ZNF500	zinc finger protein 500	FALSE	FALSE	FALSE	FALSE	FALSE	FALSE
20200205_TTNGFP_D4_GATA6ChIP_001_peak_10811	chr16	4811351	4811473	123	*	6.5	+	Intron (uc002cxo.1/26048, intron 3 of 4)	16	4800815	4816077	15263	2	26048	uc002cxo.1	4604	ENSG00000103199	ZNF500	zinc finger protein 500	FALSE	FALSE	FALSE	FALSE	FALSE	FALSE
20200205_TTNGFP_D4_GATA6ChIP_001_peak_10815	chr16	4861729	4862156	428	*	33.8	+	Promoter (8-9kb)	16	4851817	4852951	1135	2	79641	uc010uxu.3	-8778	ENSG00000067836	ROGDI	rogdi atypical leucine zipper	FALSE	FALSE	FALSE	FALSE	FALSE	FALSE
20200205_TTNGFP_D4_GATA6ChIP_001_peak_10816	chr16	4863300	4863535	236	*	20	+	Intron (uc002cxx.4/84656, intron 12 of 15)	16	4851817	4852951	1135	2	79641	uc010uxu.3	-10349	ENSG00000067836	ROGDI	rogdi atypical leucine zipper	FALSE	FALSE	FALSE	FALSE	FALSE	FALSE
20200205_TTNGFP_D4_GATA6ChIP_001_peak_10817	chr16	4933215	4933334	120	*	16.2	+	3' UTR	16	4902077	4932363	30287	1	29855	uc002cyc.3	31138	ENSG00000118900	UBN1	ubinuclein 1	FALSE	FALSE	FALSE	FALSE	FALSE	FALSE
20200205_TTNGFP_D4_GATA6ChIP_001_peak_10818	chr16	4945502	4945640	139	*	13.9	+	Exon (uc002cyd.1/5493, exon 10 of 22)	16	4932508	4987136	54629	2	5493	uc002cyd.1	41496	ENSG00000118898	PPL	periplakin	FALSE	FALSE	TRUE	TRUE	FALSE	FALSE
20200205_TTNGFP_D4_GATA6ChIP_001_peak_10819	chr16	4998093	4998224	132	*	16.2	+	Distal Intergenic	16	5008318	5069156	60839	1	9717	uc002cye.2	-10094	ENSG00000103184	SEC14L5	SEC14 like lipid binding 5	FALSE	FALSE	TRUE	FALSE	TRUE	TRUE
20200205_TTNGFP_D4_GATA6ChIP_001_peak_10820	chr16	5002745	5002871	127	*	12.9	+	Promoter (5-6kb)	16	5008318	5069156	60839	1	9717	uc002cye.2	-5447	ENSG00000103184	SEC14L5	SEC14 like lipid binding 5	FALSE	FALSE	TRUE	FALSE	FALSE	FALSE
20200205_TTNGFP_D4_GATA6ChIP_001_peak_10821	chr16	5007705	5008098	394	*	36	+	Promoter (<=1kb)	16	5008318	5069156	60839	1	9717	uc002cye.2	-220	ENSG00000103184	SEC14L5	SEC14 like lipid binding 5	TRUE	FALSE	TRUE	FALSE	TRUE	TRUE
20200205_TTNGFP_D4_GATA6ChIP_001_peak_10822	chr16	5032566	5032771	206	*	13.2	+	Intron (uc002cye.2/9717, intron 2 of 15)	16	5008318	5069156	60839	1	9717	uc002cye.2	24248	ENSG00000103184	SEC14L5	SEC14 like lipid binding 5	FALSE	FALSE	TRUE	FALSE	FALSE	FALSE
20200205_TTNGFP_D4_GATA6ChIP_001_peak_10823	chr16	5040703	5040839	137	*	10.9	+	Exon (uc002cye.2/9717, exon 5 of 16)	16	5008318	5069156	60839	1	9717	uc002cye.2	32385	ENSG00000103184	SEC14L5	SEC14 like lipid binding 5	FALSE	FALSE	TRUE	FALSE	FALSE	FALSE
20200205_TTNGFP_D4_GATA6ChIP_001_peak_10826	chr16	5112179	5112335	157	*	11.5	+	Intron (uc002cyj.3/56052, intron 2 of 13)	16	5094123	5116146	22024	2	146556	uc002cyk.4	3811	ENSG00000153446	C16orf89	chromosome 16 open reading frame 89	FALSE	FALSE	FALSE	FALSE	FALSE	FALSE
20200205_TTNGFP_D4_GATA6ChIP_001_peak_10827	chr16	5139000	5139166	167	*	14.7	+	Exon (uc002cyo.2/196483, exon 7 of 8)	16	5134301	5147789	13489	2	196483	uc002cyo.2	8623	ENSG00000118894	EEF2KMT	eukaryotic elongation factor 2 lysine methyltransferase	FALSE	FALSE	FALSE	TRUE	FALSE	FALSE
20200205_TTNGFP_D4_GATA6ChIP_001_peak_10828	chr16	5142446	5142633	188	*	7.1	+	Intron (uc002cyo.2/196483, intron 3 of 7)	16	5134301	5147789	13489	2	196483	uc002cyo.2	5156	ENSG00000118894	EEF2KMT	eukaryotic elongation factor 2 lysine methyltransferase	FALSE	FALSE	FALSE	TRUE	TRUE	TRUE
20200205_TTNGFP_D4_GATA6ChIP_001_peak_10829	chr16	5158534	5159068	535	*	22.3	+	Distal Intergenic	16	5134301	5147789	13489	2	196483	uc002cyp.2	-10745	ENSG00000118894	EEF2KMT	eukaryotic elongation factor 2 lysine methyltransferase	FALSE	FALSE	FALSE	TRUE	FALSE	FALSE
20200205_TTNGFP_D4_GATA6ChIP_001_peak_1083	chr1	17319012	17319172	161	*	13.3	+	Exon (uc001baa.2/23400, exon 17 of 29)	1	17321982	17326807	4826	2	23400	uc009vpa.1	7635	ENSG00000159363	ATP13A2	ATPase cation transporting 13A2	FALSE	FALSE	FALSE	FALSE	FALSE	FALSE
20200205_TTNGFP_D4_GATA6ChIP_001_peak_10830	chr16	5257037	5257274	238	*	23	+	Distal Intergenic	16	5134301	5147789	13489	2	196483	uc002cyp.2	-109248	ENSG00000118894	EEF2KMT	eukaryotic elongation factor 2 lysine methyltransferase	FALSE	FALSE	FALSE	TRUE	FALSE	FALSE
20200205_TTNGFP_D4_GATA6ChIP_001_peak_10832	chr16	5703057	5703220	164	*	33.1	+	Distal Intergenic	16	6069132	7703949	1634818	1	54715	uc002cyr.1	-365912	ENSG00000078328	RBFOX1	RNA binding fox-1 homolog 1	FALSE	FALSE	FALSE	FALSE	FALSE	FALSE
20200205_TTNGFP_D4_GATA6ChIP_001_peak_10833	chr16	5913285	5913543	259	*	13	+	Distal Intergenic	16	6069132	7703949	1634818	1	54715	uc002cyr.1	-155589	ENSG00000078328	RBFOX1	RNA binding fox-1 homolog 1	TRUE	FALSE	FALSE	FALSE	FALSE	FALSE
20200205_TTNGFP_D4_GATA6ChIP_001_peak_10835	chr16	8165073	8165218	146	*	10.1	+	Distal Intergenic	16	8619502	8622226	2725	2	283953	uc010uyd.2	457008	ENSG00000232258	TMEM114	transmembrane protein 114	FALSE	FALSE	FALSE	FALSE	FALSE	FALSE
20200205_TTNGFP_D4_GATA6ChIP_001_peak_10837	chr16	8820282	8820405	124	*	10.7	+	Intron (uc002czc.4/18, intron 1 of 15)	16	8814573	8878432	63860	1	18	uc010bui.3	5709	ENSG00000183044	ABAT	4-aminobutyrate aminotransferase	FALSE	FALSE	FALSE	FALSE	FALSE	FALSE
20200205_TTNGFP_D4_GATA6ChIP_001_peak_10839	chr16	8961470	8961737	268	*	27.9	+	Promoter (<=1kb)	16	8946799	8961285	14487	2	23589	uc031qva.1	-185	ENSG00000153048	CARHSP1	calcium regulated heat stable protein 1	TRUE	FALSE	FALSE	TRUE	FALSE	FALSE
20200205_TTNGFP_D4_GATA6ChIP_001_peak_1084	chr1	17440365	17440667	303	*	27.1	+	Intron (uc001baf.3/11240, intron 1 of 15)	1	17393256	17445948	52693	2	11240	uc001baf.3	5281	ENSG00000117115	PADI2	peptidyl arginine deiminase 2	FALSE	FALSE	FALSE	FALSE	FALSE	FALSE
20200205_TTNGFP_D4_GATA6ChIP_001_peak_10842	chr16	9058017	9058278	262	*	16.2	+	Promoter (<=1kb)	16	8985951	9057341	71391	2	7874	uc002czl.2	-676	ENSG00000187555	USP7	ubiquitin specific peptidase 7	FALSE	FALSE	FALSE	FALSE	FALSE	FALSE
20200205_TTNGFP_D4_GATA6ChIP_001_peak_10843	chr16	9062590	9062733	144	*	11.8	+	Promoter (5-6kb)	16	8985951	9057341	71391	2	7874	uc002czl.2	-5249	ENSG00000187555	USP7	ubiquitin specific peptidase 7	FALSE	FALSE	FALSE	FALSE	FALSE	FALSE
20200205_TTNGFP_D4_GATA6ChIP_001_peak_10844	chr16	9273581	9273704	124	*	6.1	+	Distal Intergenic	16	9328774	9328803	30	1	100422920	uc021tct.1	-55070	ENSG00000265841	MIR548X	microRNA 548x	FALSE	FALSE	FALSE	FALSE	FALSE	FALSE
20200205_TTNGFP_D4_GATA6ChIP_001_peak_10845	chr16	10206464	10206816	353	*	38.1	+	Exon (uc021tcw.1/uc021tcw.1, exon 1 of 1)	16	9856532	10275924	419393	2	2903	uc002czr.4	69108	ENSG00000183454	GRIN2A	glutamate ionotropic receptor NMDA type subunit 2A	FALSE	FALSE	TRUE	TRUE	FALSE	FALSE
20200205_TTNGFP_D4_GATA6ChIP_001_peak_10846	chr16	10277300	10277446	147	*	9.1	+	Promoter (<=1kb)	16	9847265	10276611	429347	2	2903	uc010uym.2	-689	ENSG00000183454	GRIN2A	glutamate ionotropic receptor NMDA type subunit 2A	FALSE	FALSE	TRUE	TRUE	FALSE	TRUE
20200205_TTNGFP_D4_GATA6ChIP_001_peak_10847	chr16	10317955	10318174	220	*	11.8	+	Distal Intergenic	16	9847265	10276611	429347	2	2903	uc010uym.2	-41344	ENSG00000183454	GRIN2A	glutamate ionotropic receptor NMDA type subunit 2A	FALSE	FALSE	TRUE	TRUE	FALSE	FALSE
20200205_TTNGFP_D4_GATA6ChIP_001_peak_10848	chr16	10346225	10346474	250	*	17.1	+	Distal Intergenic	16	9847265	10276611	429347	2	2903	uc010uym.2	-69614	ENSG00000183454	GRIN2A	glutamate ionotropic receptor NMDA type subunit 2A	FALSE	FALSE	TRUE	TRUE	FALSE	FALSE
20200205_TTNGFP_D4_GATA6ChIP_001_peak_10849	chr16	10678313	10678474	162	*	14.5	+	Promoter (3-4kb)	16	10622279	10674539	52261	2	2013	uc002czx.3	-3774	ENSG00000213853	EMP2	epithelial membrane protein 2	FALSE	TRUE	TRUE	FALSE	FALSE	FALSE
20200205_TTNGFP_D4_GATA6ChIP_001_peak_10850	chr16	10695444	10695571	128	*	9.4	+	Distal Intergenic	16	10622279	10674539	52261	2	2013	uc002czx.3	-20905	ENSG00000213853	EMP2	epithelial membrane protein 2	FALSE	TRUE	TRUE	FALSE	TRUE	FALSE
20200205_TTNGFP_D4_GATA6ChIP_001_peak_10851	chr16	10695758	10696004	247	*	26.2	+	Distal Intergenic	16	10622279	10674539	52261	2	2013	uc002czx.3	-21219	ENSG00000213853	EMP2	epithelial membrane protein 2	FALSE	TRUE	TRUE	FALSE	TRUE	TRUE
20200205_TTNGFP_D4_GATA6ChIP_001_peak_10852	chr16	10710853	10711018	166	*	19.1	+	Distal Intergenic	16	10622279	10674539	52261	2	2013	uc002czx.3	-36314	ENSG00000213853	EMP2	epithelial membrane protein 2	FALSE	TRUE	TRUE	FALSE	FALSE	TRUE
20200205_TTNGFP_D4_GATA6ChIP_001_peak_10853	chr16	10715802	10716439	638	*	193	+	Distal Intergenic	16	10622279	10674539	52261	2	2013	uc002czx.3	-41263	ENSG00000213853	EMP2	epithelial membrane protein 2	TRUE	TRUE	TRUE	FALSE	TRUE	TRUE
20200205_TTNGFP_D4_GATA6ChIP_001_peak_10856	chr16	10746927	10747102	176	*	18.9	+	Intron (uc002czz.1/146279, intron 5 of 6)	16	10721361	10788802	67442	2	146279	uc002czz.1	41700	ENSG00000153060	TEKT5	tektin 5	FALSE	FALSE	FALSE	FALSE	FALSE	TRUE
20200205_TTNGFP_D4_GATA6ChIP_001_peak_10857	chr16	10960461	10960731	271	*	19.2	+	Distal Intergenic	16	10971055	11002744	31690	1	4261	uc002dag.2	-10324	ENSG00000179583	CIITA	class II major histocompatibility complex transactivator	FALSE	FALSE	FALSE	FALSE	FALSE	FALSE
20200205_TTNGFP_D4_GATA6ChIP_001_peak_10861	chr16	11066123	11066275	153	*	18.3	+	Intron (uc002dan.4/23274, intron 5 of 20)	16	11038345	11276046	237702	1	23274	uc021tcy.1	27778	ENSG00000038532	CLEC16A	C-type lectin domain containing 16A	FALSE	FALSE	FALSE	FALSE	TRUE	TRUE
20200205_TTNGFP_D4_GATA6ChIP_001_peak_10862	chr16	11133768	11133907	140	*	14.4	+	Intron (uc002dan.4/23274, intron 13 of 20)	16	11219836	11276046	56211	1	23274	uc002dap.3	-85929	ENSG00000038532	CLEC16A	C-type lectin domain containing 16A	FALSE	FALSE	FALSE	FALSE	FALSE	FALSE
20200205_TTNGFP_D4_GATA6ChIP_001_peak_10863	chr16	11170426	11170753	328	*	15.9	+	Intron (uc002dan.4/23274, intron 18 of 20)	16	11219836	11276046	56211	1	23274	uc002dap.3	-49083	ENSG00000038532	CLEC16A	C-type lectin domain containing 16A	FALSE	FALSE	FALSE	FALSE	FALSE	TRUE
20200205_TTNGFP_D4_GATA6ChIP_001_peak_10864	chr16	11177744	11177861	118	*	9.7	+	Intron (uc002dan.4/23274, intron 18 of 20)	16	11219836	11276046	56211	1	23274	uc002dap.3	-41975	ENSG00000038532	CLEC16A	C-type lectin domain containing 16A	FALSE	FALSE	FALSE	FALSE	FALSE	FALSE
20200205_TTNGFP_D4_GATA6ChIP_001_peak_10865	chr16	11203421	11203594	174	*	15.7	+	Intron (uc002dan.4/23274, intron 18 of 20)	16	11219836	11276046	56211	1	23274	uc002dap.3	-16242	ENSG00000038532	CLEC16A	C-type lectin domain containing 16A	FALSE	FALSE	FALSE	FALSE	FALSE	TRUE
20200205_TTNGFP_D4_GATA6ChIP_001_peak_10866	chr16	11290692	11290908	217	*	14.1	+	Distal Intergenic	16	11343506	11445617	102112	1	116028	uc002daq.1	-52598	ENSG00000175643	RMI2	RecQ mediated genome instability 2	FALSE	FALSE	FALSE	FALSE	FALSE	FALSE
20200205_TTNGFP_D4_GATA6ChIP_001_peak_10867	chr16	11300148	11300385	238	*	17.4	+	Distal Intergenic	16	11343506	11445617	102112	1	116028	uc002daq.1	-43121	ENSG00000175643	RMI2	RecQ mediated genome instability 2	FALSE	FALSE	FALSE	FALSE	FALSE	FALSE
20200205_TTNGFP_D4_GATA6ChIP_001_peak_10868	chr16	11307471	11307626	156	*	13.9	+	Distal Intergenic	16	11343506	11445617	102112	1	116028	uc002daq.1	-35880	ENSG00000175643	RMI2	RecQ mediated genome instability 2	FALSE	FALSE	FALSE	FALSE	FALSE	FALSE
20200205_TTNGFP_D4_GATA6ChIP_001_peak_1087	chr1	17556284	17556566	283	*	20.9	+	Promoter (3-4kb)	1	17559776	17572501	12726	1	29943	uc010oco.1	-3210	ENSG00000142623	PADI1	peptidyl arginine deiminase 1	TRUE	FALSE	FALSE	FALSE	FALSE	FALSE
20200205_TTNGFP_D4_GATA6ChIP_001_peak_10870	chr16	11484661	11484834	174	*	14.4	+	Distal Intergenic	16	11439311	11445617	6307	1	116028	uc002daw.1	45350	ENSG00000175643	RMI2	RecQ mediated genome instability 2	FALSE	FALSE	FALSE	FALSE	FALSE	FALSE
20200205_TTNGFP_D4_GATA6ChIP_001_peak_10872	chr16	11489238	11489529	292	*	24.1	+	Distal Intergenic	16	11439311	11445617	6307	1	116028	uc002daw.1	49927	ENSG00000175643	RMI2	RecQ mediated genome instability 2	FALSE	FALSE	FALSE	FALSE	FALSE	FALSE
20200205_TTNGFP_D4_GATA6ChIP_001_peak_10873	chr16	11492149	11492296	148	*	12.1	+	Distal Intergenic	16	11439311	11445617	6307	1	116028	uc002daw.1	52838	ENSG00000175643	RMI2	RecQ mediated genome instability 2	FALSE	FALSE	FALSE	FALSE	FALSE	FALSE
20200205_TTNGFP_D4_GATA6ChIP_001_peak_10874	chr16	11495200	11495389	190	*	12.1	+	Distal Intergenic	16	11439311	11445617	6307	1	116028	uc002daw.1	55889	ENSG00000175643	RMI2	RecQ mediated genome instability 2	FALSE	FALSE	FALSE	FALSE	FALSE	FALSE
20200205_TTNGFP_D4_GATA6ChIP_001_peak_10876	chr16	11514856	11514995	140	*	12.9	+	Distal Intergenic	16	11439311	11445617	6307	1	116028	uc002daw.1	75545	ENSG00000175643	RMI2	RecQ mediated genome instability 2	FALSE	FALSE	FALSE	FALSE	FALSE	FALSE
20200205_TTNGFP_D4_GATA6ChIP_001_peak_10879	chr16	11564539	11564710	172	*	17.7	+	Intron (uc002dax.1/uc002dax.1, intron 8 of 22)	16	11641578	11680229	38652	2	9516	uc002daz.3	115519	ENSG00000189067	LITAF	lipopolysaccharide induced TNF factor	FALSE	FALSE	FALSE	FALSE	FALSE	FALSE
20200205_TTNGFP_D4_GATA6ChIP_001_peak_1088	chr1	17557813	17557971	159	*	9.4	+	Promoter (1-2kb)	1	17559776	17572501	12726	1	29943	uc010oco.1	-1805	ENSG00000142623	PADI1	peptidyl arginine deiminase 1	FALSE	FALSE	FALSE	FALSE	FALSE	FALSE
20200205_TTNGFP_D4_GATA6ChIP_001_peak_10880	chr16	11570421	11571014	594	*	47.5	+	Exon (uc002dax.1/uc002dax.1, exon 6 of 23)	16	11641578	11680229	38652	2	9516	uc002daz.3	109215	ENSG00000189067	LITAF	lipopolysaccharide induced TNF factor	TRUE	FALSE	FALSE	FALSE	FALSE	FALSE
20200205_TTNGFP_D4_GATA6ChIP_001_peak_10882	chr16	11715908	11716170	263	*	18.8	+	Distal Intergenic	16	11641578	11681322	39745	2	9516	uc002dbd.3	-34586	ENSG00000189067	LITAF	lipopolysaccharide induced TNF factor	FALSE	FALSE	FALSE	FALSE	FALSE	FALSE
20200205_TTNGFP_D4_GATA6ChIP_001_peak_10883	chr16	11755376	11755549	174	*	17.6	+	Promoter (6-7kb)	16	11762289	11773015	10727	1	8303	uc002dbf.3	-6740	ENSG00000184602	SNN	stannin	FALSE	FALSE	FALSE	FALSE	FALSE	FALSE
20200205_TTNGFP_D4_GATA6ChIP_001_peak_10886	chr16	12415518	12415688	171	*	18.8	+	Intron (uc002dby.5/92017, intron 15 of 20)	16	12154667	12293540	138874	1	92017	uc010uyx.1	260851	ENSG00000048471	SNX29	sorting nexin 29	FALSE	FALSE	FALSE	FALSE	FALSE	FALSE
20200205_TTNGFP_D4_GATA6ChIP_001_peak_10887	chr16	12509891	12510023	133	*	11.2	+	Intron (uc002dby.5/92017, intron 18 of 20)	16	12814178	12814228	51	1	100616195	uc021tdb.1	-304155	ENSG00000264733	MIR4718	microRNA 4718	FALSE	FALSE	FALSE	FALSE	FALSE	FALSE
20200205_TTNGFP_D4_GATA6ChIP_001_peak_10888	chr16	12524966	12525104	139	*	10.4	+	Intron (uc002dby.5/92017, intron 18 of 20)	16	12814178	12814228	51	1	100616195	uc021tdb.1	-289074	ENSG00000264733	MIR4718	microRNA 4718	FALSE	FALSE	FALSE	FALSE	FALSE	FALSE
20200205_TTNGFP_D4_GATA6ChIP_001_peak_10889	chr16	12529773	12530159	387	*	30.6	+	Intron (uc002dby.5/92017, intron 18 of 20)	16	12814178	12814228	51	1	100616195	uc021tdb.1	-284019	ENSG00000264733	MIR4718	microRNA 4718	TRUE	FALSE	FALSE	FALSE	FALSE	FALSE
20200205_TTNGFP_D4_GATA6ChIP_001_peak_1089	chr1	17577168	17577308	141	*	17.1	+	Promoter (1-2kb)	1	17575593	17610727	35135	1	51702	uc001bai.3	1575	ENSG00000142619	PADI3	peptidyl arginine deiminase 3	FALSE	FALSE	FALSE	FALSE	FALSE	FALSE
20200205_TTNGFP_D4_GATA6ChIP_001_peak_10890	chr16	12612180	12612886	707	*	58	+	Intron (uc002dby.5/92017, intron 19 of 20)	16	12814178	12814228	51	1	100616195	uc021tdb.1	-201292	ENSG00000264733	MIR4718	microRNA 4718	TRUE	FALSE	FALSE	FALSE	TRUE	TRUE
20200205_TTNGFP_D4_GATA6ChIP_001_peak_10891	chr16	12626736	12626947	212	*	16.2	+	Intron (uc002dby.5/92017, intron 20 of 20)	16	12814178	12814228	51	1	100616195	uc021tdb.1	-187231	ENSG00000264733	MIR4718	microRNA 4718	FALSE	FALSE	FALSE	FALSE	TRUE	FALSE
20200205_TTNGFP_D4_GATA6ChIP_001_peak_10892	chr16	12799419	12799568	150	*	9.7	+	Intron (uc002dca.4/55313, intron 2 of 3)	16	12814178	12814228	51	1	100616195	uc021tdb.1	-14610	ENSG00000264733	MIR4718	microRNA 4718	FALSE	FALSE	FALSE	FALSE	FALSE	FALSE
20200205_TTNGFP_D4_GATA6ChIP_001_peak_10893	chr16	12994938	12995196	259	*	15.6	+	Promoter (<=1kb)	16	12995477	13005507	10031	1	729993	uc002dcd.2	-281	ENSG00000237515	SHISA9	shisa family member 9	FALSE	FALSE	FALSE	FALSE	FALSE	TRUE
20200205_TTNGFP_D4_GATA6ChIP_001_peak_10894	chr16	14014267	14014388	122	*	10.4	+	Promoter (<=1kb)	16	14014014	14046205	32192	1	2072	uc002dce.2	253	ENSG00000175595	ERCC4	ERCC excision repair 4, endonuclease catalytic subunit	FALSE	FALSE	FALSE	FALSE	FALSE	FALSE
20200205_TTNGFP_D4_GATA6ChIP_001_peak_10896	chr16	14156658	14156830	173	*	9.1	+	Promoter (8-9kb)	16	14165196	14360630	195435	1	57496	uc002dcg.3	-8366	ENSG00000186260	MRTFB	myocardin related transcription factor B	FALSE	FALSE	FALSE	FALSE	FALSE	FALSE
20200205_TTNGFP_D4_GATA6ChIP_001_peak_10897	chr16	14379206	14379565	360	*	23.6	+	Distal Intergenic	16	14397824	14397906	83	1	574455	uc021tdg.1	-18259	ENSG00000207639	MIR193B	microRNA 193b	TRUE	FALSE	FALSE	FALSE	TRUE	FALSE
20200205_TTNGFP_D4_GATA6ChIP_001_peak_109	chr1	1444043	1444269	227	*	12.6	+	Promoter (3-4kb)	1	1447523	1470067	22545	1	55210	uc001afz.2	-3254	ENSG00000197785	ATAD3A	ATPase family AAA domain containing 3A	FALSE	FALSE	FALSE	FALSE	FALSE	FALSE
20200205_TTNGFP_D4_GATA6ChIP_001_peak_1090	chr1	17579690	17579821	132	*	15.4	+	Intron (uc001bai.3/51702, intron 1 of 15)	1	17575593	17610727	35135	1	51702	uc001bai.3	4097	ENSG00000142619	PADI3	peptidyl arginine deiminase 3	FALSE	FALSE	FALSE	FALSE	FALSE	FALSE
20200205_TTNGFP_D4_GATA6ChIP_001_peak_10900	chr16	14441635	14441784	150	*	17.7	+	Distal Intergenic	16	14403142	14403228	87	1	100126355	uc021tdh.1	38493	ENSG00000199130	MIR365A	microRNA 365a	FALSE	FALSE	FALSE	FALSE	TRUE	FALSE
20200205_TTNGFP_D4_GATA6ChIP_001_peak_10901	chr16	14461379	14461547	169	*	16.2	+	Distal Intergenic	16	14403142	14403228	87	1	100126355	uc021tdh.1	58237	ENSG00000199130	MIR365A	microRNA 365a	FALSE	FALSE	FALSE	FALSE	FALSE	FALSE
20200205_TTNGFP_D4_GATA6ChIP_001_peak_10902	chr16	14461898	14462146	249	*	13.2	+	Distal Intergenic	16	14403142	14403228	87	1	100126355	uc021tdh.1	58756	ENSG00000199130	MIR365A	microRNA 365a	FALSE	FALSE	FALSE	FALSE	FALSE	FALSE
20200205_TTNGFP_D4_GATA6ChIP_001_peak_10903	chr16	14743410	14743568	159	*	8.2	+	Intron (uc002dco.3/51283, intron 3 of 7)	16	14738131	14763093	24963	1	51283	uc010uzh.2	5279	ENSG00000103429	BFAR	bifunctional apoptosis regulator	FALSE	FALSE	FALSE	FALSE	FALSE	FALSE
20200205_TTNGFP_D4_GATA6ChIP_001_peak_10904	chr16	14747920	14748070	151	*	11.4	+	Intron (uc002dco.3/51283, intron 4 of 7)	16	14738131	14763093	24963	1	51283	uc010uzh.2	9789	ENSG00000103429	BFAR	bifunctional apoptosis regulator	FALSE	FALSE	FALSE	FALSE	FALSE	FALSE
20200205_TTNGFP_D4_GATA6ChIP_001_peak_10905	chr16	14953993	14954218	226	*	17.4	+	Intron (uc002dcv.3/23420, intron 11 of 30)	16	14927643	14990014	62372	1	23420	uc002dcv.3	26350	ENSG00000103512	NOMO1	NODAL modulator 1	FALSE	FALSE	FALSE	FALSE	FALSE	FALSE
20200205_TTNGFP_D4_GATA6ChIP_001_peak_10907	chr16	15019020	15019397	378	*	20.3	+	Promoter (1-2kb)	16	15021064	15045931	24868	1	9284	uc002dcx.4	-1667	ENSG00000183426	NPIPA1	nuclear pore complex interacting protein family member A1	FALSE	FALSE	FALSE	FALSE	FALSE	FALSE
20200205_TTNGFP_D4_GATA6ChIP_001_peak_1091	chr1	17581862	17581992	131	*	11.2	+	Intron (uc001bai.3/51702, intron 1 of 15)	1	17575593	17610727	35135	1	51702	uc001bai.3	6269	ENSG00000142619	PADI3	peptidyl arginine deiminase 3	FALSE	FALSE	FALSE	FALSE	FALSE	FALSE
20200205_TTNGFP_D4_GATA6ChIP_001_peak_10910	chr16	15121490	15121659	170	*	23.5	+	Intron (uc010uzl.2/23042, intron 14 of 22)	16	15131710	15149936	18227	2	123803	uc002ddd.4	28277	ENSG00000157045	NTAN1	N-terminal asparagine amidase	FALSE	FALSE	FALSE	FALSE	FALSE	FALSE
20200205_TTNGFP_D4_GATA6ChIP_001_peak_10911	chr16	15122965	15123189	225	*	29.5	+	3' UTR	16	15131710	15149936	18227	2	123803	uc002ddd.4	26747	ENSG00000157045	NTAN1	N-terminal asparagine amidase	FALSE	FALSE	FALSE	FALSE	FALSE	FALSE
20200205_TTNGFP_D4_GATA6ChIP_001_peak_10912	chr16	15187974	15188153	180	*	8.5	+	Promoter (<=1kb)	16	15153879	15188158	34280	2	54700	uc002dde.3	5	ENSG00000085721	RRN3	RRN3 homolog, RNA polymerase I transcription factor	FALSE	FALSE	FALSE	FALSE	TRUE	TRUE
20200205_TTNGFP_D4_GATA6ChIP_001_peak_10915	chr16	15235545	15235840	296	*	17.9	+	Distal Intergenic	16	15248707	15248859	153	2	100500852	uc021tdn.1	13019	ENSG00000264115	MIR3180-4	microRNA 3180-4	FALSE	FALSE	FALSE	FALSE	FALSE	FALSE
20200205_TTNGFP_D4_GATA6ChIP_001_peak_10916	chr16	15325186	15325324	139	*	15.6	+	Distal Intergenic	16	15248707	15248859	153	2	100500852	uc021tdn.1	-76327	ENSG00000264115	MIR3180-4	microRNA 3180-4	FALSE	FALSE	FALSE	FALSE	FALSE	FALSE
20200205_TTNGFP_D4_GATA6ChIP_001_peak_10917	chr16	15811917	15812288	372	*	27.1	+	Exon (uc002ddv.3/4629, exon 38 of 43)	16	15806751	15818995	12245	2	4629	uc010bvh.3	6707	ENSG00000133392	MYH11	myosin heavy chain 11	FALSE	FALSE	FALSE	FALSE	FALSE	FALSE
20200205_TTNGFP_D4_GATA6ChIP_001_peak_10919	chr16	15851042	15851325	284	*	20.3	+	Intron (uc002ddv.3/4629, intron 14 of 42)	16	15843025	15877389	34365	2	4629	uc002dea.1	26064	ENSG00000133392	MYH11	myosin heavy chain 11	FALSE	FALSE	FALSE	FALSE	FALSE	FALSE
20200205_TTNGFP_D4_GATA6ChIP_001_peak_10920	chr16	15901350	15901773	424	*	39.1	+	Intron (uc002ddv.3/4629, intron 3 of 42)	16	15843025	15877389	34365	2	4629	uc002dea.1	-23961	ENSG00000133392	MYH11	myosin heavy chain 11	TRUE	FALSE	FALSE	FALSE	TRUE	TRUE
20200205_TTNGFP_D4_GATA6ChIP_001_peak_10921	chr16	15905338	15905468	131	*	17.9	+	Intron (uc002ddv.3/4629, intron 3 of 42)	16	15843025	15877389	34365	2	4629	uc002dea.1	-27949	ENSG00000133392	MYH11	myosin heavy chain 11	FALSE	FALSE	FALSE	FALSE	FALSE	FALSE
20200205_TTNGFP_D4_GATA6ChIP_001_peak_10923	chr16	15983437	15983636	200	*	10	+	Promoter (<=1kb)	16	15959577	15982447	22871	2	123811	uc002ded.2	-990	ENSG00000133393	FOPNL	FGFR1OP N-terminal like	FALSE	FALSE	FALSE	FALSE	FALSE	FALSE
20200205_TTNGFP_D4_GATA6ChIP_001_peak_10924	chr16	16019053	16019175	123	*	16.3	+	Distal Intergenic	16	16043434	16236930	193497	1	4363	uc010bvi.3	-24259	ENSG00000103222	ABCC1	ATP binding cassette subfamily C member 1	FALSE	FALSE	FALSE	FALSE	FALSE	FALSE
20200205_TTNGFP_D4_GATA6ChIP_001_peak_10926	chr16	16352462	16352688	227	*	12.9	+	Intron (uc002dep.3/408050, intron 11 of 31)	16	16326389	16388668	62280	1	408050	uc002deq.3	26073	ENSG00000103226	NOMO3	NODAL modulator 3	FALSE	FALSE	FALSE	FALSE	FALSE	FALSE
20200205_TTNGFP_D4_GATA6ChIP_001_peak_10927	chr16	16460500	16460672	173	*	11.2	+	Distal Intergenic	16	16427504	16444465	16962	1	339044	uc002dew.4	32996	NA	PKD1P1	polycystin 1, transient receptor potential channel interacting pseudogene 1	TRUE	FALSE	FALSE	FALSE	FALSE	FALSE
20200205_TTNGFP_D4_GATA6ChIP_001_peak_1093	chr1	17604305	17604489	185	*	16	+	Intron (uc001bai.3/51702, intron 13 of 15)	1	17575593	17610727	35135	1	51702	uc001bai.3	28712	ENSG00000142619	PADI3	peptidyl arginine deiminase 3	FALSE	FALSE	FALSE	FALSE	FALSE	FALSE
20200205_TTNGFP_D4_GATA6ChIP_001_peak_10933	chr16	18812543	18812930	388	*	22.3	+	Promoter (<=1kb)	16	18802991	18812692	9702	2	23204	uc010van.1	0	ENSG00000170540	ARL6IP1	ADP ribosylation factor like GTPase 6 interacting protein 1	FALSE	FALSE	FALSE	FALSE	TRUE	TRUE
20200205_TTNGFP_D4_GATA6ChIP_001_peak_10934	chr16	18813077	18813201	125	*	7	+	Promoter (<=1kb)	16	18802991	18812857	9867	2	23204	uc010bvz.1	-220	ENSG00000170540	ARL6IP1	ADP ribosylation factor like GTPase 6 interacting protein 1	FALSE	FALSE	FALSE	FALSE	FALSE	FALSE
20200205_TTNGFP_D4_GATA6ChIP_001_peak_10935	chr16	19195007	19195232	226	*	18	+	Exon (uc002dfw.3/51760, exon 5 of 8)	16	19183679	19278554	94876	1	51760	uc002dfy.3	11328	ENSG00000103528	SYT17	synaptotagmin 17	FALSE	FALSE	FALSE	FALSE	FALSE	FALSE
20200205_TTNGFP_D4_GATA6ChIP_001_peak_10938	chr16	19499271	19499572	302	*	16.5	+	Intron (uc010vaq.2/79838, intron 16 of 20)	16	19467806	19510434	42629	1	79838	uc002dgg.4	31465	ENSG00000103534	TMC5	transmembrane channel like 5	TRUE	FALSE	FALSE	FALSE	TRUE	TRUE
20200205_TTNGFP_D4_GATA6ChIP_001_peak_10939	chr16	19533205	19533404	200	*	11.7	+	Promoter (<=1kb)	16	19513015	19533450	20436	2	51573	uc002dgh.3	46	ENSG00000006007	GDE1	glycerophosphodiester phosphodiesterase 1	FALSE	FALSE	FALSE	FALSE	TRUE	TRUE
20200205_TTNGFP_D4_GATA6ChIP_001_peak_10941	chr16	19879840	19880021	182	*	13.5	+	Intron (uc021tef.1/51704, intron 1 of 2)	16	19869820	19884168	14349	2	51704	uc021tef.1	4147	ENSG00000167191	GPRC5B	G protein-coupled receptor class C group 5 member B	TRUE	FALSE	FALSE	TRUE	FALSE	FALSE
20200205_TTNGFP_D4_GATA6ChIP_001_peak_10942	chr16	19883250	19883507	258	*	24.1	+	Promoter (<=1kb)	16	19869820	19884168	14349	2	51704	uc021tef.1	661	ENSG00000167191	GPRC5B	G protein-coupled receptor class C group 5 member B	FALSE	FALSE	FALSE	TRUE	FALSE	FALSE
20200205_TTNGFP_D4_GATA6ChIP_001_peak_10943	chr16	19895096	19895406	311	*	21.8	+	Promoter (<=1kb)	16	19870293	19896151	25859	2	51704	uc002dgt.3	745	ENSG00000167191	GPRC5B	G protein-coupled receptor class C group 5 member B	TRUE	FALSE	FALSE	TRUE	FALSE	FALSE
20200205_TTNGFP_D4_GATA6ChIP_001_peak_10944	chr16	20873732	20873898	167	*	10.6	+	5' UTR	16	20911557	20933031	21475	1	57149	uc010bwi.1	-37659	ENSG00000102897	LYRM1	LYR motif containing 1	FALSE	FALSE	FALSE	FALSE	FALSE	FALSE
20200205_TTNGFP_D4_GATA6ChIP_001_peak_10945	chr16	21059518	21059871	354	*	16.7	+	Intron (uc010vbe.2/55567, intron 31 of 61)	16	20944476	20996416	51941	2	55567	uc010vbd.2	-63102	ENSG00000158486	DNAH3	dynein axonemal heavy chain 3	FALSE	FALSE	FALSE	FALSE	FALSE	TRUE
20200205_TTNGFP_D4_GATA6ChIP_001_peak_10947	chr16	21324745	21324907	163	*	12.9	+	Intron (uc010bwr.1/400508, intron 1 of 2)	16	21269839	21314404	44566	2	1428	uc002dim.3	-10341	ENSG00000103316	CRYM	crystallin mu	FALSE	FALSE	FALSE	TRUE	FALSE	FALSE
20200205_TTNGFP_D4_GATA6ChIP_001_peak_10948	chr16	21358491	21358669	179	*	13.9	+	Promoter (2-3kb)	16	21360684	21397254	36571	1	100652781	uc021teh.1	-2015	NA	SNX29P1	sorting nexin 29 pseudogene 1	FALSE	FALSE	FALSE	FALSE	FALSE	FALSE
20200205_TTNGFP_D4_GATA6ChIP_001_peak_10949	chr16	21513534	21513690	157	*	9.5	+	Intron (uc021tel.1/uc021tel.1, intron 2 of 3)	16	21483649	21498990	15342	2	100271836	uc002djc.3	-14544	ENSG00000180747	SMG1P3	SMG1 pseudogene 3	FALSE	FALSE	FALSE	FALSE	TRUE	TRUE
20200205_TTNGFP_D4_GATA6ChIP_001_peak_1095	chr1	17657561	17657711	151	*	14.5	+	Exon (uc009vpc.2/23569, exon 2 of 10)	1	17634690	17690495	55806	1	23569	uc001baj.2	22871	ENSG00000159339	PADI4	peptidyl arginine deiminase 4	FALSE	FALSE	FALSE	FALSE	FALSE	FALSE
20200205_TTNGFP_D4_GATA6ChIP_001_peak_10954	chr16	21532764	21533339	576	*	90.5	+	Promoter (<=1kb)	16	21529230	21531765	2536	2	387254	uc002djd.3	-999	NA	SLC7A5P2	solute carrier family 7 member 5 pseudogene 2	TRUE	FALSE	FALSE	FALSE	FALSE	TRUE
20200205_TTNGFP_D4_GATA6ChIP_001_peak_10955	chr16	21534883	21535065	183	*	22.3	+	Promoter (3-4kb)	16	21529230	21531765	2536	2	387254	uc002djd.3	-3118	NA	SLC7A5P2	solute carrier family 7 member 5 pseudogene 2	FALSE	FALSE	FALSE	FALSE	FALSE	FALSE
20200205_TTNGFP_D4_GATA6ChIP_001_peak_10956	chr16	21548106	21548382	277	*	38.6	+	Intron (uc021tel.1/uc021tel.1, intron 2 of 3)	16	21529230	21531765	2536	2	387254	uc002djd.3	-16341	NA	SLC7A5P2	solute carrier family 7 member 5 pseudogene 2	TRUE	FALSE	FALSE	FALSE	TRUE	TRUE
20200205_TTNGFP_D4_GATA6ChIP_001_peak_10958	chr16	21554459	21555158	700	*	51	+	Intron (uc021tel.1/uc021tel.1, intron 2 of 3)	16	21529230	21531765	2536	2	387254	uc002djd.3	-22694	NA	SLC7A5P2	solute carrier family 7 member 5 pseudogene 2	FALSE	FALSE	FALSE	FALSE	FALSE	FALSE
20200205_TTNGFP_D4_GATA6ChIP_001_peak_10959	chr16	21558748	21558951	204	*	22.7	+	Intron (uc021tel.1/uc021tel.1, intron 2 of 3)	16	21529230	21531765	2536	2	387254	uc002djd.3	-26983	NA	SLC7A5P2	solute carrier family 7 member 5 pseudogene 2	FALSE	FALSE	FALSE	FALSE	FALSE	FALSE
20200205_TTNGFP_D4_GATA6ChIP_001_peak_1096	chr1	17689888	17690203	316	*	23	+	Promoter (8-9kb)	1	17698741	17728195	29455	1	353238	uc001bak.1	-8538	ENSG00000276747	PADI6	peptidyl arginine deiminase 6	FALSE	FALSE	FALSE	FALSE	FALSE	FALSE
20200205_TTNGFP_D4_GATA6ChIP_001_peak_10962	chr16	22316053	22316175	123	*	10.4	+	Intron (uc002dkj.2/55718, intron 2 of 17)	16	22308696	22346424	37729	1	55718	uc010vbt.3	7357	ENSG00000058600	POLR3E	RNA polymerase III subunit E	FALSE	FALSE	FALSE	FALSE	FALSE	FALSE
20200205_TTNGFP_D4_GATA6ChIP_001_peak_10963	chr16	22318134	22318302	169	*	13.3	+	Intron (uc002dkj.2/55718, intron 3 of 17)	16	22308696	22346424	37729	1	55718	uc010vbt.3	9438	ENSG00000058600	POLR3E	RNA polymerase III subunit E	FALSE	FALSE	FALSE	FALSE	FALSE	FALSE
20200205_TTNGFP_D4_GATA6ChIP_001_peak_10964	chr16	22339702	22339828	127	*	14.1	+	3' UTR	16	22308696	22346424	37729	1	55718	uc010vbt.3	31006	ENSG00000058600	POLR3E	RNA polymerase III subunit E	FALSE	FALSE	FALSE	FALSE	FALSE	FALSE
20200205_TTNGFP_D4_GATA6ChIP_001_peak_10965	chr16	22416871	22416991	121	*	6.8	+	Distal Intergenic	16	22357257	22385938	28682	2	1039	uc002dkn.3	-30933	ENSG00000140743	CDR2	cerebellar degeneration related protein 2	FALSE	FALSE	FALSE	FALSE	FALSE	FALSE
20200205_TTNGFP_D4_GATA6ChIP_001_peak_10966	chr16	22436660	22436891	232	*	24.4	+	Intron (uc002dkp.2/100131998, intron 6 of 6)	16	22448329	22503541	55213	1	641298	uc010bxf.3	-11438	ENSG00000237296	SMG1P1	SMG1 pseudogene 1	FALSE	FALSE	FALSE	FALSE	FALSE	FALSE
20200205_TTNGFP_D4_GATA6ChIP_001_peak_10967	chr16	22550828	22550954	127	*	11	+	Promoter (6-7kb)	16	22557019	22588186	31168	1	653786	uc002dlh.3	-6065	ENSG00000257838	OTOAP1	OTOA pseudogene 1	FALSE	FALSE	FALSE	FALSE	FALSE	FALSE
20200205_TTNGFP_D4_GATA6ChIP_001_peak_10968	chr16	22734613	22734750	138	*	16.5	+	Intron (uc021tfc.1/693131, intron 1 of 1)	16	22729603	22803362	73760	1	693131	uc021tfc.1	5010	ENSG00000263690	MIR548D2	microRNA 548d-2	FALSE	FALSE	FALSE	FALSE	FALSE	FALSE
20200205_TTNGFP_D4_GATA6ChIP_001_peak_10969	chr16	23197105	23197281	177	*	18.8	+	Intron (uc002dlm.1/6340, intron 1 of 12)	16	23194040	23228200	34161	1	6340	uc002dlm.1	3065	ENSG00000166828	SCNN1G	sodium channel epithelial 1 gamma subunit	TRUE	FALSE	TRUE	FALSE	FALSE	FALSE
20200205_TTNGFP_D4_GATA6ChIP_001_peak_1097	chr1	17718628	17718766	139	*	13.9	+	Exon (uc001bak.1/353238, exon 9 of 17)	1	17698741	17728195	29455	1	353238	uc001bak.1	19887	ENSG00000276747	PADI6	peptidyl arginine deiminase 6	FALSE	FALSE	FALSE	FALSE	FALSE	FALSE
20200205_TTNGFP_D4_GATA6ChIP_001_peak_10970	chr16	23390816	23391277	462	*	37.1	+	Intron (uc002dln.3/6338, intron 11 of 12)	16	23399814	23464512	64699	2	91949	uc002dlo.3	73235	ENSG00000168434	COG7	component of oligomeric golgi complex 7	FALSE	FALSE	FALSE	FALSE	FALSE	FALSE
20200205_TTNGFP_D4_GATA6ChIP_001_peak_10972	chr16	23464048	23464350	303	*	21.2	+	Promoter (<=1kb)	16	23399814	23464512	64699	2	91949	uc002dlo.3	162	ENSG00000168434	COG7	component of oligomeric golgi complex 7	FALSE	FALSE	FALSE	FALSE	TRUE	TRUE
20200205_TTNGFP_D4_GATA6ChIP_001_peak_10974	chr16	23555919	23556351	433	*	25	+	Exon (uc002dls.4/124454, exon 3 of 10)	16	23533334	23562163	28830	2	124454	uc002dlr.4	5812	ENSG00000103356	EARS2	glutamyl-tRNA synthetase 2, mitochondrial	FALSE	FALSE	FALSE	FALSE	FALSE	FALSE
20200205_TTNGFP_D4_GATA6ChIP_001_peak_10975	chr16	23568585	23568954	370	*	23.6	+	Promoter (<=1kb)	16	23533334	23568696	35363	2	124454	uc002dls.4	0	ENSG00000103356	EARS2	glutamyl-tRNA synthetase 2, mitochondrial	FALSE	FALSE	FALSE	FALSE	TRUE	TRUE
20200205_TTNGFP_D4_GATA6ChIP_001_peak_10976	chr16	23701128	23701579	452	*	20.1	+	3' UTR	16	23690201	23701688	11488	1	5347	uc002dlz.1	10927	ENSG00000166851	PLK1	polo like kinase 1	FALSE	FALSE	TRUE	TRUE	FALSE	FALSE
20200205_TTNGFP_D4_GATA6ChIP_001_peak_10977	chr16	24057198	24057349	152	*	19.4	+	Intron (uc002dmd.3/5579, intron 5 of 16)	16	24266874	24373737	106864	1	10368	uc002dmf.3	-209525	ENSG00000006116	CACNG3	calcium voltage-gated channel auxiliary subunit gamma 3	FALSE	FALSE	FALSE	FALSE	TRUE	TRUE
20200205_TTNGFP_D4_GATA6ChIP_001_peak_10978	chr16	24534952	24535290	339	*	44.8	+	Distal Intergenic	16	24549014	24581820	32807	1	5930	uc010vcb.1	-13724	ENSG00000122257	RBBP6	RB binding protein 6, ubiquitin ligase	TRUE	FALSE	FALSE	FALSE	TRUE	TRUE
20200205_TTNGFP_D4_GATA6ChIP_001_peak_10979	chr16	24550497	24550625	129	*	7.6	+	Promoter (<=1kb)	16	24550908	24560722	9815	1	5930	uc002dmg.3	-283	ENSG00000122257	RBBP6	RB binding protein 6, ubiquitin ligase	FALSE	FALSE	FALSE	FALSE	FALSE	FALSE
20200205_TTNGFP_D4_GATA6ChIP_001_peak_1098	chr1	17749837	17750126	290	*	16	+	Intron (uc001bal.3/55920, intron 3 of 11)	1	17733251	17765059	31809	2	55920	uc001bal.3	14933	ENSG00000179051	RCC2	regulator of chromosome condensation 2	TRUE	FALSE	FALSE	FALSE	FALSE	FALSE
20200205_TTNGFP_D4_GATA6ChIP_001_peak_10983	chr16	25070099	25070329	231	*	10.7	+	Distal Intergenic	16	25043062	25044098	1037	1	554206	uc010bxu.3	27037	ENSG00000262587	LOC554206	leucine carboxyl methyltransferase 1 pseudogene	FALSE	FALSE	FALSE	FALSE	FALSE	FALSE
20200205_TTNGFP_D4_GATA6ChIP_001_peak_10984	chr16	25160075	25160501	427	*	48	+	Promoter (<=1kb)	16	25151892	25160353	8462	2	100506655	uc002dob.2	0	ENSG00000260034	LCMT1-AS2	LCMT1 antisense RNA 2	TRUE	FALSE	FALSE	FALSE	TRUE	TRUE
20200205_TTNGFP_D4_GATA6ChIP_001_peak_10985	chr16	25232040	25232198	159	*	15	+	Intron (uc002doc.3/343, intron 2 of 5)	16	25228285	25240253	11969	1	343	uc002doc.3	3755	ENSG00000103375	AQP8	aquaporin 8	FALSE	FALSE	FALSE	FALSE	FALSE	FALSE
20200205_TTNGFP_D4_GATA6ChIP_001_peak_10986	chr16	26888751	26888881	131	*	12.6	+	Distal Intergenic	16	27078219	27080487	2269	1	162083	uc010vcm.2	-189338	ENSG00000234186	C16orf82	chromosome 16 open reading frame 82	FALSE	FALSE	FALSE	FALSE	FALSE	FALSE
20200205_TTNGFP_D4_GATA6ChIP_001_peak_10987	chr16	27039391	27039507	117	*	12	+	Distal Intergenic	16	27078219	27080487	2269	1	162083	uc010vcm.2	-38712	ENSG00000234186	C16orf82	chromosome 16 open reading frame 82	FALSE	FALSE	FALSE	FALSE	FALSE	FALSE
20200205_TTNGFP_D4_GATA6ChIP_001_peak_1099	chr1	17786981	17787149	169	*	13.5	+	Distal Intergenic	1	17733251	17766250	33000	2	55920	uc001bam.3	-20731	ENSG00000179051	RCC2	regulator of chromosome condensation 2	FALSE	FALSE	FALSE	FALSE	FALSE	FALSE
20200205_TTNGFP_D4_GATA6ChIP_001_peak_10990	chr16	27221623	27221751	129	*	13.3	+	Promoter (<=1kb)	16	27221414	27233089	11676	1	79831	uc010bxw.2	209	ENSG00000155666	KDM8	lysine demethylase 8	FALSE	FALSE	FALSE	FALSE	FALSE	FALSE
20200205_TTNGFP_D4_GATA6ChIP_001_peak_10991	chr16	27235780	27235897	118	*	10.6	+	Downstream (<1kb)	16	27225933	27233089	7157	1	79831	uc010bxx.2	9847	ENSG00000155666	KDM8	lysine demethylase 8	FALSE	FALSE	FALSE	FALSE	FALSE	FALSE
20200205_TTNGFP_D4_GATA6ChIP_001_peak_10992	chr16	27241953	27242087	135	*	16.8	+	Intron (uc002doi.1/197370, intron 5 of 7)	16	27225933	27233089	7157	1	79831	uc010bxx.2	16020	ENSG00000155666	KDM8	lysine demethylase 8	FALSE	FALSE	FALSE	FALSE	FALSE	FALSE
20200205_TTNGFP_D4_GATA6ChIP_001_peak_10993	chr16	27248728	27248922	195	*	14.8	+	Intron (uc002doi.1/197370, intron 2 of 7)	16	27225933	27233089	7157	1	79831	uc010bxx.2	22795	ENSG00000155666	KDM8	lysine demethylase 8	FALSE	FALSE	FALSE	FALSE	FALSE	FALSE
20200205_TTNGFP_D4_GATA6ChIP_001_peak_10994	chr16	27335287	27335572	286	*	23.8	+	Intron (uc002don.4/3566, intron 1 of 10)	16	27325230	27376099	50870	1	3566	uc010bxy.4	10057	ENSG00000077238	IL4R	interleukin 4 receptor	TRUE	FALSE	FALSE	FALSE	FALSE	TRUE
20200205_TTNGFP_D4_GATA6ChIP_001_peak_10995	chr16	27338070	27338292	223	*	13	+	Intron (uc002don.4/3566, intron 1 of 10)	16	27325230	27376099	50870	1	3566	uc010bxy.4	12840	ENSG00000077238	IL4R	interleukin 4 receptor	FALSE	FALSE	FALSE	FALSE	FALSE	FALSE
20200205_TTNGFP_D4_GATA6ChIP_001_peak_10998	chr16	27473324	27473704	381	*	24.2	+	Promoter (8-9kb)	16	27458991	27464714	5724	2	283888	uc002dot.3	-8610	ENSG00000259954	IL21R-AS1	IL21R antisense RNA 1	FALSE	FALSE	FALSE	FALSE	FALSE	FALSE
20200205_TTNGFP_D4_GATA6ChIP_001_peak_11	chr1	884599	884735	137	*	20.6	+	Promoter (2-3kb)	1	879583	882440	2858	2	26155	uc031pkq.1	-2159	ENSG00000188976	NOC2L	NOC2 like nucleolar associated transcriptional repressor	FALSE	FALSE	FALSE	TRUE	FALSE	FALSE
20200205_TTNGFP_D4_GATA6ChIP_001_peak_110	chr1	1444528	1444695	168	*	8.6	+	Promoter (2-3kb)	1	1447523	1470067	22545	1	55210	uc001afz.2	-2828	ENSG00000197785	ATAD3A	ATPase family AAA domain containing 3A	FALSE	FALSE	FALSE	FALSE	FALSE	FALSE
20200205_TTNGFP_D4_GATA6ChIP_001_peak_11000	chr16	27484977	27485094	118	*	13	+	Intron (uc002dou.3/2975, intron 29 of 36)	16	27458991	27464714	5724	2	283888	uc002dot.3	-20263	ENSG00000259954	IL21R-AS1	IL21R antisense RNA 1	FALSE	FALSE	FALSE	FALSE	FALSE	FALSE
20200205_TTNGFP_D4_GATA6ChIP_001_peak_11001	chr16	27486437	27486588	152	*	14.2	+	Intron (uc002dou.3/2975, intron 29 of 36)	16	27458991	27464714	5724	2	283888	uc002dot.3	-21723	ENSG00000259954	IL21R-AS1	IL21R antisense RNA 1	TRUE	FALSE	FALSE	FALSE	FALSE	FALSE
20200205_TTNGFP_D4_GATA6ChIP_001_peak_11002	chr16	27560734	27560887	154	*	10.1	+	Promoter (<=1kb)	16	27471934	27561251	89318	2	2975	uc002dou.3	364	ENSG00000077235	GTF3C1	general transcription factor IIIC subunit 1	TRUE	FALSE	FALSE	FALSE	FALSE	FALSE
20200205_TTNGFP_D4_GATA6ChIP_001_peak_11004	chr16	27718250	27718392	143	*	14.4	+	Intron (uc002dow.3/23247, intron 12 of 27)	16	27788187	27791692	3506	1	23247	uc010vco.2	-69795	ENSG00000047578	KIAA0556	KIAA0556	TRUE	FALSE	FALSE	FALSE	FALSE	FALSE
20200205_TTNGFP_D4_GATA6ChIP_001_peak_11005	chr16	27802412	27802704	293	*	30	+	3' UTR	16	27788187	27791692	3506	1	23247	uc010vco.2	14225	ENSG00000047578	KIAA0556	KIAA0556	FALSE	FALSE	FALSE	FALSE	FALSE	FALSE
20200205_TTNGFP_D4_GATA6ChIP_001_peak_11006	chr16	27820126	27820332	207	*	13.6	+	Intron (uc010bxz.1/146395, intron 4 of 5)	16	27788187	27791692	3506	1	23247	uc010vco.2	31939	ENSG00000047578	KIAA0556	KIAA0556	FALSE	FALSE	FALSE	FALSE	FALSE	FALSE
20200205_TTNGFP_D4_GATA6ChIP_001_peak_11009	chr16	27914207	27914600	394	*	31.9	+	Intron (uc002doz.2/146395, intron 2 of 6)	16	27798850	27899478	100629	2	146395	uc002doy.2	-14729	ENSG00000169181	GSG1L	GSG1 like	FALSE	FALSE	FALSE	FALSE	FALSE	FALSE
20200205_TTNGFP_D4_GATA6ChIP_001_peak_1101	chr1	17877863	17878026	164	*	16.2	+	Intron (uc031pli.1/55160, intron 1 of 1)	1	17866330	18024370	158041	1	55160	uc001ban.3	11533	ENSG00000074964	ARHGEF10L	Rho guanine nucleotide exchange factor 10 like	FALSE	FALSE	FALSE	FALSE	FALSE	TRUE
20200205_TTNGFP_D4_GATA6ChIP_001_peak_11011	chr16	28347434	28347691	258	*	15.3	+	Distal Intergenic	16	28303840	28335170	31331	1	388228	uc002dpd.3	43594	ENSG00000188322	SBK1	SH3 domain binding kinase 1	FALSE	FALSE	FALSE	FALSE	FALSE	FALSE
20200205_TTNGFP_D4_GATA6ChIP_001_peak_11013	chr16	28565231	28565480	250	*	16.8	+	Promoter (<=1kb)	16	28565249	28603111	37863	1	112869	uc002dqf.3	0	ENSG00000176476	SGF29	SAGA complex associated factor 29	FALSE	FALSE	FALSE	FALSE	TRUE	TRUE
20200205_TTNGFP_D4_GATA6ChIP_001_peak_11015	chr16	28602474	28602658	185	*	20.4	+	Intron (uc002dqf.3/112869, intron 9 of 9)	16	28603264	28607801	4538	2	6799	uc002dqg.2	5143	ENSG00000197165	SULT1A2	sulfotransferase family 1A member 2	FALSE	FALSE	FALSE	FALSE	FALSE	FALSE
20200205_TTNGFP_D4_GATA6ChIP_001_peak_11016	chr16	28613117	28613284	168	*	19.5	+	Promoter (4-5kb)	16	28603264	28608391	5128	2	6799	uc002dqh.2	-4726	ENSG00000197165	SULT1A2	sulfotransferase family 1A member 2	FALSE	FALSE	FALSE	FALSE	FALSE	FALSE
20200205_TTNGFP_D4_GATA6ChIP_001_peak_11017	chr16	28615546	28615729	184	*	17.7	+	Intron (uc010vct.2/uc010vct.2, intron 2 of 7)	16	28616908	28620649	3742	2	6817	uc002dqi.3	4920	ENSG00000196502	SULT1A1	sulfotransferase family 1A member 1	FALSE	FALSE	FALSE	FALSE	FALSE	FALSE
20200205_TTNGFP_D4_GATA6ChIP_001_peak_11018	chr16	28845806	28846024	219	*	20.3	+	Promoter (<=1kb)	16	28845386	28848558	3173	1	11273	uc002drg.3	420	ENSG00000168488	ATXN2L	ataxin 2 like	FALSE	FALSE	FALSE	FALSE	FALSE	FALSE
20200205_TTNGFP_D4_GATA6ChIP_001_peak_11019	chr16	28887445	28887739	295	*	16.3	+	Promoter (2-3kb)	16	28889809	28915830	26022	1	487	uc002drn.1	-2070	ENSG00000196296	ATP2A1	ATPase sarcoplasmic/endoplasmic reticulum Ca2+ transporting 1	FALSE	FALSE	FALSE	FALSE	FALSE	FALSE
20200205_TTNGFP_D4_GATA6ChIP_001_peak_1102	chr1	17898415	17898764	350	*	28.3	+	Promoter (8-9kb)	1	17907048	18024370	117323	1	55160	uc001bao.3	-8284	ENSG00000074964	ARHGEF10L	Rho guanine nucleotide exchange factor 10 like	FALSE	FALSE	FALSE	FALSE	FALSE	FALSE
20200205_TTNGFP_D4_GATA6ChIP_001_peak_11022	chr16	28916364	28916637	274	*	17	+	Exon (uc002drq.3/79874, exon 13 of 13)	16	28900108	28905564	5457	1	487	uc010bym.1	16256	ENSG00000196296	ATP2A1	ATPase sarcoplasmic/endoplasmic reticulum Ca2+ transporting 1	FALSE	FALSE	FALSE	FALSE	FALSE	FALSE
20200205_TTNGFP_D4_GATA6ChIP_001_peak_11024	chr16	28922016	28922266	251	*	18	+	3' UTR	16	28915742	28936532	20791	2	79874	uc002drq.3	14266	ENSG00000177548	RABEP2	rabaptin, RAB GTPase binding effector protein 2	FALSE	FALSE	FALSE	FALSE	FALSE	FALSE
20200205_TTNGFP_D4_GATA6ChIP_001_peak_11025	chr16	28951457	28951629	173	*	10.7	+	Intron (uc010vct.2/uc010vct.2, intron 2 of 7)	16	28943260	28950668	7409	1	930	uc010byo.2	8197	ENSG00000177455	CD19	CD19 molecule	FALSE	FALSE	FALSE	FALSE	FALSE	FALSE
20200205_TTNGFP_D4_GATA6ChIP_001_peak_11026	chr16	28985744	28985998	255	*	17.9	+	Promoter (<=1kb)	16	28986096	28992008	5913	1	83985	uc002dry.2	-98	ENSG00000169682	SPNS1	sphingolipid transporter 1 (putative)	TRUE	FALSE	FALSE	FALSE	TRUE	TRUE
20200205_TTNGFP_D4_GATA6ChIP_001_peak_11027	chr16	28989654	28989885	232	*	19.4	+	Intron (uc002dry.2/83985, intron 3 of 4)	16	28986096	28996838	10743	1	83985	uc010vdi.1	3558	ENSG00000169682	SPNS1	sphingolipid transporter 1 (putative)	TRUE	FALSE	FALSE	FALSE	FALSE	FALSE
20200205_TTNGFP_D4_GATA6ChIP_001_peak_11029	chr16	29132126	29132277	152	*	17.3	+	Intron (uc010vct.2/uc010vct.2, intron 2 of 7)	16	29086163	29128038	41876	1	653390	uc010vdn.2	45963	ENSG00000103472	RRN3P2	RRN3 homolog, RNA polymerase I transcription factor pseudogene 2	FALSE	FALSE	FALSE	FALSE	TRUE	TRUE
20200205_TTNGFP_D4_GATA6ChIP_001_peak_1103	chr1	17899774	17899953	180	*	19.7	+	Promoter (7-8kb)	1	17907048	18024370	117323	1	55160	uc001bao.3	-7095	ENSG00000074964	ARHGEF10L	Rho guanine nucleotide exchange factor 10 like	FALSE	FALSE	FALSE	FALSE	FALSE	FALSE
20200205_TTNGFP_D4_GATA6ChIP_001_peak_11033	chr16	29169108	29169490	383	*	40.9	+	Intron (uc010vct.2/uc010vct.2, intron 2 of 7)	16	29086163	29128038	41876	1	653390	uc010vdn.2	82945	ENSG00000103472	RRN3P2	RRN3 homolog, RNA polymerase I transcription factor pseudogene 2	TRUE	FALSE	FALSE	FALSE	FALSE	TRUE
20200205_TTNGFP_D4_GATA6ChIP_001_peak_11034	chr16	29170286	29170523	238	*	16.2	+	Intron (uc010vct.2/uc010vct.2, intron 2 of 7)	16	29086163	29128038	41876	1	653390	uc010vdn.2	84123	ENSG00000103472	RRN3P2	RRN3 homolog, RNA polymerase I transcription factor pseudogene 2	FALSE	FALSE	FALSE	FALSE	FALSE	FALSE
20200205_TTNGFP_D4_GATA6ChIP_001_peak_11035	chr16	29180705	29181016	312	*	26.5	+	Intron (uc010vct.2/uc010vct.2, intron 2 of 7)	16	29086163	29128038	41876	1	653390	uc010vdn.2	94542	ENSG00000103472	RRN3P2	RRN3 homolog, RNA polymerase I transcription factor pseudogene 2	TRUE	FALSE	FALSE	FALSE	TRUE	TRUE
20200205_TTNGFP_D4_GATA6ChIP_001_peak_11037	chr16	29189286	29189753	468	*	38.8	+	Intron (uc010vct.2/uc010vct.2, intron 2 of 7)	16	29086163	29128038	41876	1	653390	uc010vdn.2	103123	ENSG00000103472	RRN3P2	RRN3 homolog, RNA polymerase I transcription factor pseudogene 2	TRUE	FALSE	FALSE	FALSE	TRUE	TRUE
20200205_TTNGFP_D4_GATA6ChIP_001_peak_11039	chr16	29192761	29193258	498	*	38.8	+	Intron (uc010vct.2/uc010vct.2, intron 2 of 7)	16	29086163	29128038	41876	1	653390	uc010vdn.2	106598	ENSG00000103472	RRN3P2	RRN3 homolog, RNA polymerase I transcription factor pseudogene 2	FALSE	FALSE	FALSE	FALSE	FALSE	FALSE
20200205_TTNGFP_D4_GATA6ChIP_001_peak_1104	chr1	17914357	17914685	329	*	64.2	+	Promoter (<=1kb)	1	17914911	17966476	51566	1	55160	uc010ocr.1	-226	ENSG00000074964	ARHGEF10L	Rho guanine nucleotide exchange factor 10 like	TRUE	FALSE	FALSE	FALSE	TRUE	FALSE
20200205_TTNGFP_D4_GATA6ChIP_001_peak_11040	chr16	29193886	29194006	121	*	15	+	Intron (uc010vct.2/uc010vct.2, intron 2 of 7)	16	29086163	29128038	41876	1	653390	uc010vdn.2	107723	ENSG00000103472	RRN3P2	RRN3 homolog, RNA polymerase I transcription factor pseudogene 2	FALSE	FALSE	FALSE	FALSE	FALSE	FALSE
20200205_TTNGFP_D4_GATA6ChIP_001_peak_11041	chr16	29240034	29240204	171	*	8.2	+	Intron (uc010vct.2/uc010vct.2, intron 2 of 7)	16	29302828	29383434	80607	1	440352	uc031qvl.1	-62624	NA	SNX29P2	sorting nexin 29 pseudogene 2	FALSE	FALSE	FALSE	FALSE	FALSE	FALSE
20200205_TTNGFP_D4_GATA6ChIP_001_peak_11045	chr16	29279231	29279721	491	*	27.2	+	Intron (uc010vct.2/uc010vct.2, intron 2 of 7)	16	29302828	29383434	80607	1	440352	uc031qvl.1	-23107	NA	SNX29P2	sorting nexin 29 pseudogene 2	TRUE	FALSE	FALSE	FALSE	FALSE	FALSE
20200205_TTNGFP_D4_GATA6ChIP_001_peak_11048	chr16	29313099	29313425	327	*	17.6	+	Promoter (<=1kb)	16	29313608	29376380	62773	1	440352	uc021tfv.1	-183	NA	SNX29P2	sorting nexin 29 pseudogene 2	FALSE	FALSE	FALSE	FALSE	FALSE	FALSE
20200205_TTNGFP_D4_GATA6ChIP_001_peak_11051	chr16	29325036	29325272	237	*	32.8	+	Intron (uc031qvl.1/440352, intron 3 of 10)	16	29313608	29376380	62773	1	440352	uc021tfv.1	11428	NA	SNX29P2	sorting nexin 29 pseudogene 2	TRUE	FALSE	FALSE	FALSE	FALSE	FALSE
20200205_TTNGFP_D4_GATA6ChIP_001_peak_11055	chr16	29625975	29626625	651	*	65.5	+	Promoter (<=1kb)	16	29624424	29625038	615	2	81893	uc002dtl.1	-937	NA	SLC7A5P1	solute carrier family 7 member 5 pseudogene 1	TRUE	FALSE	FALSE	FALSE	TRUE	TRUE
20200205_TTNGFP_D4_GATA6ChIP_001_peak_11056	chr16	29644711	29644827	117	*	6.1	+	Intron (uc010bzb.2/552900, intron 2 of 4)	16	29624424	29625038	615	2	81893	uc002dtl.1	-19673	NA	SLC7A5P1	solute carrier family 7 member 5 pseudogene 1	FALSE	FALSE	FALSE	FALSE	FALSE	FALSE
20200205_TTNGFP_D4_GATA6ChIP_001_peak_11058	chr16	29690249	29690393	145	*	9.5	+	Promoter (<=1kb)	16	29690441	29709314	18874	1	23475	uc002dto.3	-48	ENSG00000103485	QPRT	quinolinate phosphoribosyltransferase	FALSE	FALSE	FALSE	FALSE	FALSE	TRUE
20200205_TTNGFP_D4_GATA6ChIP_001_peak_11059	chr16	29759715	29759837	123	*	7.6	+	Promoter (2-3kb)	16	29753786	29757340	3555	2	283897	uc002dtp.2	-2375	ENSG00000185905	C16orf54	chromosome 16 open reading frame 54	FALSE	FALSE	FALSE	FALSE	FALSE	FALSE
20200205_TTNGFP_D4_GATA6ChIP_001_peak_1106	chr1	17922605	17922813	209	*	27.5	+	Intron (uc009vpe.1/55160, intron 4 of 26)	1	17914911	17966476	51566	1	55160	uc010ocr.1	7694	ENSG00000074964	ARHGEF10L	Rho guanine nucleotide exchange factor 10 like	FALSE	FALSE	FALSE	FALSE	FALSE	FALSE
20200205_TTNGFP_D4_GATA6ChIP_001_peak_11060	chr16	29818070	29818210	141	*	8.3	+	Promoter (<=1kb)	16	29817858	29822504	4647	1	4150	uc031qvn.1	212	ENSG00000103495	MAZ	MYC associated zinc finger protein	FALSE	FALSE	FALSE	TRUE	FALSE	FALSE
20200205_TTNGFP_D4_GATA6ChIP_001_peak_11061	chr16	29818749	29818956	208	*	12.1	+	Promoter (<=1kb)	16	29817858	29822504	4647	1	4150	uc031qvn.1	891	ENSG00000103495	MAZ	MYC associated zinc finger protein	FALSE	FALSE	FALSE	TRUE	FALSE	FALSE
20200205_TTNGFP_D4_GATA6ChIP_001_peak_11062	chr16	29884729	29884884	156	*	15	+	Exon (uc002dup.4/26470, exon 13 of 18)	16	29875155	29879374	4220	1	440356	uc002duo.2	9574	ENSG00000214725	CDIPTOSP	CDIP transferase opposite strand, pseudogene	FALSE	FALSE	FALSE	FALSE	FALSE	FALSE
20200205_TTNGFP_D4_GATA6ChIP_001_peak_11065	chr16	29985856	29986053	198	*	22.4	+	Promoter (<=1kb)	16	29985188	30003582	18395	1	9344	uc002dvc.2	668	ENSG00000149930	TAOK2	TAO kinase 2	FALSE	FALSE	FALSE	FALSE	FALSE	FALSE
20200205_TTNGFP_D4_GATA6ChIP_001_peak_11068	chr16	30036204	30036356	153	*	9.2	+	Promoter (1-2kb)	16	30034655	30036023	1369	1	146378	uc002dvs.2	1549	ENSG00000167194	C16orf92	chromosome 16 open reading frame 92	FALSE	FALSE	FALSE	FALSE	FALSE	FALSE
20200205_TTNGFP_D4_GATA6ChIP_001_peak_1107	chr1	17945699	17945852	154	*	13.9	+	Promoter (<=1kb)	1	17944811	18024370	79560	1	55160	uc010ocs.2	888	ENSG00000074964	ARHGEF10L	Rho guanine nucleotide exchange factor 10 like	FALSE	FALSE	FALSE	FALSE	FALSE	FALSE
20200205_TTNGFP_D4_GATA6ChIP_001_peak_11070	chr16	30075082	30075334	253	*	17.3	+	Promoter (<=1kb)	16	30075600	30081741	6142	1	226	uc002dvz.3	-266	ENSG00000149925	ALDOA	aldolase, fructose-bisphosphate A	FALSE	FALSE	FALSE	FALSE	FALSE	FALSE
20200205_TTNGFP_D4_GATA6ChIP_001_peak_11071	chr16	30081239	30081358	120	*	12.1	+	Exon (uc002dvx.3/226, exon 13 of 14)	16	30076994	30081741	4748	1	226	uc010veg.2	4245	ENSG00000149925	ALDOA	aldolase, fructose-bisphosphate A	FALSE	FALSE	FALSE	FALSE	FALSE	FALSE
20200205_TTNGFP_D4_GATA6ChIP_001_peak_11072	chr16	30097674	30098090	417	*	31	+	Exon (uc010veh.2/6911, exon 8 of 9)	16	30097115	30103205	6091	2	6911	uc010veh.2	5115	ENSG00000149922	TBX6	T-box 6	FALSE	TRUE	TRUE	TRUE	FALSE	FALSE
20200205_TTNGFP_D4_GATA6ChIP_001_peak_11073	chr16	30105187	30105440	254	*	35.3	+	Promoter (1-2kb)	16	30099237	30103208	3972	2	6911	uc002dwk.1	-1979	ENSG00000149922	TBX6	T-box 6	TRUE	TRUE	TRUE	TRUE	FALSE	FALSE
20200205_TTNGFP_D4_GATA6ChIP_001_peak_11074	chr16	30129394	30129935	542	*	32.8	+	Exon (uc002dwr.3/5595, exon 2 of 8)	16	30125426	30134289	8864	2	5595	uc002dwr.3	4354	ENSG00000102882	MAPK3	mitogen-activated protein kinase 3	FALSE	FALSE	FALSE	FALSE	FALSE	FALSE
20200205_TTNGFP_D4_GATA6ChIP_001_peak_11075	chr16	30197567	30198037	471	*	25.4	+	Promoter (<=1kb)	16	30198003	30200396	2394	1	11151	uc002dwy.1	0	ENSG00000102879	CORO1A	coronin 1A	FALSE	FALSE	FALSE	TRUE	FALSE	FALSE
20200205_TTNGFP_D4_GATA6ChIP_001_peak_11076	chr16	30358778	30358997	220	*	17.9	+	Distal Intergenic	16	30362087	30366255	4169	2	10421	uc002dxr.3	7258	ENSG00000169217	CD2BP2	CD2 cytoplasmic tail binding protein 2	FALSE	FALSE	FALSE	FALSE	FALSE	FALSE
20200205_TTNGFP_D4_GATA6ChIP_001_peak_11078	chr16	30531763	30531896	134	*	15.6	+	Intron (uc002dyi.4/3683, intron 30 of 30)	16	30535322	30537910	2589	2	79724	uc002dyk.4	6014	ENSG00000169957	ZNF768	zinc finger protein 768	FALSE	FALSE	FALSE	FALSE	FALSE	FALSE
20200205_TTNGFP_D4_GATA6ChIP_001_peak_11080	chr16	30566616	30566876	261	*	11.4	+	Promoter (2-3kb)	16	30565085	30569642	4558	2	92595	uc002dyq.3	2766	ENSG00000169951	ZNF764	zinc finger protein 764	FALSE	FALSE	FALSE	FALSE	FALSE	FALSE
20200205_TTNGFP_D4_GATA6ChIP_001_peak_11081	chr16	30570038	30570213	176	*	23.8	+	Promoter (<=1kb)	16	30565085	30569642	4558	2	92595	uc002dyr.2	-396	ENSG00000169951	ZNF764	zinc finger protein 764	TRUE	FALSE	FALSE	FALSE	FALSE	FALSE
20200205_TTNGFP_D4_GATA6ChIP_001_peak_11083	chr16	30709338	30709559	222	*	20.4	+	Promoter (<=1kb)	16	30709025	30709810	786	2	730183	uc031qvs.1	251	ENSG00000261840	LOC730183	uncharacterized LOC730183	FALSE	FALSE	FALSE	FALSE	TRUE	TRUE
20200205_TTNGFP_D4_GATA6ChIP_001_peak_11084	chr16	30749256	30749579	324	*	33.3	+	Promoter (<=1kb)	16	30748370	30756517	8148	1	100862671	uc031qvt.1	886	ENSG00000281991	TMEM265	transmembrane protein 265	FALSE	FALSE	FALSE	FALSE	FALSE	FALSE
20200205_TTNGFP_D4_GATA6ChIP_001_peak_11085	chr16	30749772	30750054	283	*	28.5	+	Promoter (1-2kb)	16	30748370	30756517	8148	1	100862671	uc031qvt.1	1402	ENSG00000281991	TMEM265	transmembrane protein 265	FALSE	FALSE	FALSE	FALSE	FALSE	FALSE
20200205_TTNGFP_D4_GATA6ChIP_001_peak_11087	chr16	30762586	30762702	117	*	14.4	+	Promoter (2-3kb)	16	30760124	30763234	3111	1	5261	uc002dzl.1	2462	ENSG00000156873	PHKG2	phosphorylase kinase catalytic subunit gamma 2	FALSE	FALSE	FALSE	FALSE	FALSE	FALSE
20200205_TTNGFP_D4_GATA6ChIP_001_peak_11088	chr16	30773387	30773690	304	*	27.7	+	Promoter (<=1kb)	16	30768744	30773519	4776	2	90835	uc002dzo.4	0	ENSG00000196118	CCDC189	coiled-coil domain containing 189	TRUE	FALSE	FALSE	FALSE	TRUE	TRUE
20200205_TTNGFP_D4_GATA6ChIP_001_peak_11089	chr16	30776171	30776335	165	*	13.5	+	Promoter (2-3kb)	16	30773641	30787628	13988	1	9810	uc010vfb.2	2530	ENSG00000103549	RNF40	ring finger protein 40	FALSE	FALSE	FALSE	TRUE	FALSE	FALSE
20200205_TTNGFP_D4_GATA6ChIP_001_peak_1109	chr1	17952695	17952875	181	*	17.6	+	Promoter (<=1kb)	1	17952451	18024370	71920	1	55160	uc009vpf.3	244	ENSG00000074964	ARHGEF10L	Rho guanine nucleotide exchange factor 10 like	FALSE	FALSE	FALSE	FALSE	FALSE	FALSE
20200205_TTNGFP_D4_GATA6ChIP_001_peak_11091	chr16	30879846	30880115	270	*	20.7	+	Intron (uc021tgq.1/9274, intron 5 of 5)	16	30886587	30886644	58	2	100616231	uc021tgr.1	6529	ENSG00000265991	MIR4519	microRNA 4519	FALSE	FALSE	FALSE	FALSE	FALSE	FALSE
20200205_TTNGFP_D4_GATA6ChIP_001_peak_11092	chr16	30907054	30907210	157	*	24.7	+	Promoter (<=1kb)	16	30907928	30914881	6954	1	1489	uc002dzw.3	-718	ENSG00000150281	CTF1	cardiotrophin 1	FALSE	FALSE	FALSE	FALSE	FALSE	FALSE
20200205_TTNGFP_D4_GATA6ChIP_001_peak_11093	chr16	30907417	30907670	254	*	19.4	+	Promoter (<=1kb)	16	30907928	30914881	6954	1	1489	uc002dzw.3	-258	ENSG00000150281	CTF1	cardiotrophin 1	FALSE	FALSE	FALSE	FALSE	FALSE	TRUE
20200205_TTNGFP_D4_GATA6ChIP_001_peak_11094	chr16	30953529	30953708	180	*	17.9	+	Promoter (6-7kb)	16	30960405	30966259	5855	1	93129	uc002eac.3	-6697	ENSG00000175938	ORAI3	ORAI calcium release-activated calcium modulator 3	FALSE	FALSE	FALSE	FALSE	FALSE	FALSE
20200205_TTNGFP_D4_GATA6ChIP_001_peak_11095	chr16	30961097	30961676	580	*	78	+	Promoter (<=1kb)	16	30960405	30966259	5855	1	93129	uc002eac.3	692	ENSG00000175938	ORAI3	ORAI calcium release-activated calcium modulator 3	TRUE	FALSE	FALSE	FALSE	TRUE	TRUE
20200205_TTNGFP_D4_GATA6ChIP_001_peak_11097	chr16	30994652	30994919	268	*	36.2	+	Promoter (1-2kb)	16	30996519	31000473	3955	1	80270	uc002eaf.2	-1600	ENSG00000099377	HSD3B7	hydroxy-delta-5-steroid dehydrogenase, 3 beta- and steroid delta-isomerase 7	FALSE	FALSE	FALSE	FALSE	FALSE	FALSE
20200205_TTNGFP_D4_GATA6ChIP_001_peak_11099	chr16	31001157	31001452	296	*	31.9	+	3' UTR	16	30996781	31000473	3693	1	80270	uc002eah.2	4376	ENSG00000099377	HSD3B7	hydroxy-delta-5-steroid dehydrogenase, 3 beta- and steroid delta-isomerase 7	FALSE	FALSE	FALSE	FALSE	FALSE	FALSE
20200205_TTNGFP_D4_GATA6ChIP_001_peak_111	chr1	1455254	1455374	121	*	17.4	+	Intron (uc001afz.2/55210, intron 5 of 15)	1	1447910	1470067	22158	1	55210	uc001agb.2	7344	ENSG00000197785	ATAD3A	ATPase family AAA domain containing 3A	FALSE	FALSE	FALSE	FALSE	FALSE	FALSE
20200205_TTNGFP_D4_GATA6ChIP_001_peak_11100	chr16	31004147	31004294	148	*	14.8	+	Exon (uc010cad.2/112755, exon 10 of 10)	16	30996781	31000473	3693	1	80270	uc002eah.2	7366	ENSG00000099377	HSD3B7	hydroxy-delta-5-steroid dehydrogenase, 3 beta- and steroid delta-isomerase 7	FALSE	FALSE	FALSE	FALSE	FALSE	FALSE
20200205_TTNGFP_D4_GATA6ChIP_001_peak_11101	chr16	31013796	31013951	156	*	13.3	+	Intron (uc010cad.2/112755, intron 1 of 9)	16	31000577	31021829	21253	2	112755	uc010cad.2	7878	ENSG00000099365	STX1B	syntaxin 1B	FALSE	FALSE	FALSE	FALSE	FALSE	FALSE
20200205_TTNGFP_D4_GATA6ChIP_001_peak_11103	chr16	31049674	31049820	147	*	19.1	+	Intron (uc002eak.4/6810, intron 8 of 11)	16	31044812	31051488	6677	1	6810	uc002eam.4	4862	ENSG00000103496	STX4	syntaxin 4	FALSE	FALSE	FALSE	FALSE	FALSE	FALSE
20200205_TTNGFP_D4_GATA6ChIP_001_peak_11104	chr16	31053168	31053414	247	*	15.7	+	Exon (uc002ean.1/uc002ean.1, exon 1 of 2)	16	31044812	31051488	6677	1	6810	uc002eam.4	8356	ENSG00000103496	STX4	syntaxin 4	FALSE	FALSE	FALSE	FALSE	FALSE	FALSE
20200205_TTNGFP_D4_GATA6ChIP_001_peak_11105	chr16	31073605	31073911	307	*	27.4	+	Promoter (2-3kb)	16	31072164	31076409	4246	2	79759	uc010cag.2	2498	ENSG00000167394	ZNF668	zinc finger protein 668	FALSE	FALSE	FALSE	FALSE	FALSE	FALSE
20200205_TTNGFP_D4_GATA6ChIP_001_peak_11106	chr16	31088501	31088662	162	*	23	+	Promoter (2-3kb)	16	31085743	31094833	9091	1	9726	uc002eap.3	2758	ENSG00000167395	ZNF646	zinc finger protein 646	FALSE	FALSE	FALSE	FALSE	FALSE	FALSE
20200205_TTNGFP_D4_GATA6ChIP_001_peak_11107	chr16	31091441	31091894	454	*	31.5	+	Exon (uc002eap.3/9726, exon 2 of 3)	16	31085743	31094833	9091	1	9726	uc002eap.3	5698	ENSG00000167395	ZNF646	zinc finger protein 646	FALSE	FALSE	FALSE	FALSE	FALSE	FALSE
20200205_TTNGFP_D4_GATA6ChIP_001_peak_1111	chr1	17962509	17962684	176	*	33.6	+	Intron (uc009vpe.1/55160, intron 17 of 26)	1	17952451	18024370	71920	1	55160	uc009vpf.3	10058	ENSG00000074964	ARHGEF10L	Rho guanine nucleotide exchange factor 10 like	FALSE	FALSE	FALSE	FALSE	FALSE	FALSE
20200205_TTNGFP_D4_GATA6ChIP_001_peak_11110	chr16	31123512	31123678	167	*	17.4	+	3' UTR	16	31119615	31124112	4498	1	10295	uc010cai.4	3897	ENSG00000103507	BCKDK	branched chain keto acid dehydrogenase kinase	FALSE	FALSE	FALSE	FALSE	FALSE	FALSE
20200205_TTNGFP_D4_GATA6ChIP_001_peak_11111	chr16	31143939	31144095	157	*	14.2	+	Exon (uc002ebc.4/5652, exon 4 of 6)	16	31142754	31147151	4398	2	5652	uc002ebc.4	3056	ENSG00000052344	PRSS8	serine protease 8	FALSE	FALSE	FALSE	TRUE	FALSE	FALSE
20200205_TTNGFP_D4_GATA6ChIP_001_peak_11112	chr16	31149845	31150070	226	*	22.3	+	Promoter (2-3kb)	16	31145363	31147151	1789	2	5652	uc031qvu.1	-2694	ENSG00000052344	PRSS8	serine protease 8	FALSE	FALSE	FALSE	TRUE	FALSE	FALSE
20200205_TTNGFP_D4_GATA6ChIP_001_peak_11114	chr16	31477244	31477373	130	*	13.2	+	Promoter (6-7kb)	16	31483476	31489281	5806	1	7041	uc002ecd.2	-6103	ENSG00000140682	TGFB1I1	transforming growth factor beta 1 induced transcript 1	FALSE	FALSE	FALSE	FALSE	FALSE	FALSE
20200205_TTNGFP_D4_GATA6ChIP_001_peak_11116	chr16	31580277	31580396	120	*	13.9	+	Promoter (<=1kb)	16	31579088	31580845	1758	2	440359	uc010vfr.1	449	NA	YBX3P1	Y-box binding protein 3 pseudogene 1	FALSE	FALSE	FALSE	FALSE	TRUE	TRUE
20200205_TTNGFP_D4_GATA6ChIP_001_peak_11117	chr16	31714718	31714860	143	*	12.3	+	Promoter (2-3kb)	16	31711934	31718745	6812	1	100132341	uc002ecm.4	2784	ENSG00000131797	CLUHP3	clustered mitochondria homolog pseudogene 3	FALSE	FALSE	FALSE	FALSE	FALSE	FALSE
20200205_TTNGFP_D4_GATA6ChIP_001_peak_11118	chr16	31722112	31722296	185	*	11.7	+	Promoter (2-3kb)	16	31724550	31771207	46658	1	124411	uc010vfs.2	-2254	ENSG00000197302	ZNF720	zinc finger protein 720	FALSE	FALSE	FALSE	FALSE	FALSE	FALSE
20200205_TTNGFP_D4_GATA6ChIP_001_peak_11119	chr16	31992433	31992550	118	*	8.9	+	Distal Intergenic	16	31885079	31928629	43551	1	10308	uc031qvx.1	107354	ENSG00000185947	ZNF267	zinc finger protein 267	FALSE	FALSE	FALSE	FALSE	FALSE	FALSE
20200205_TTNGFP_D4_GATA6ChIP_001_peak_11123	chr16	32096382	32096680	299	*	23.9	+	Distal Intergenic	16	32162609	32163874	1266	2	440362	uc002ecx.4	67194	NA	NA	NA	TRUE	FALSE	FALSE	FALSE	FALSE	FALSE
20200205_TTNGFP_D4_GATA6ChIP_001_peak_11124	chr16	32127971	32128178	208	*	17.7	+	Distal Intergenic	16	32162609	32163874	1266	2	440362	uc002ecx.4	35696	NA	NA	NA	FALSE	FALSE	FALSE	FALSE	FALSE	FALSE
20200205_TTNGFP_D4_GATA6ChIP_001_peak_11128	chr16	32347799	32347997	199	*	16.7	+	Distal Intergenic	16	32300868	32301302	435	2	390705	uc021tgz.1	-46497	NA	LOC390705	protein phosphatase 2 regulatory subunit B'', beta pseudogene	FALSE	FALSE	FALSE	FALSE	FALSE	FALSE
20200205_TTNGFP_D4_GATA6ChIP_001_peak_11129	chr16	32350683	32351313	631	*	48	+	Distal Intergenic	16	32300868	32301302	435	2	390705	uc021tgz.1	-49381	NA	LOC390705	protein phosphatase 2 regulatory subunit B'', beta pseudogene	TRUE	FALSE	FALSE	FALSE	FALSE	FALSE
20200205_TTNGFP_D4_GATA6ChIP_001_peak_11130	chr16	32351818	32352162	345	*	29.1	+	Distal Intergenic	16	32300868	32301302	435	2	390705	uc021tgz.1	-50516	NA	LOC390705	protein phosphatase 2 regulatory subunit B'', beta pseudogene	TRUE	FALSE	FALSE	FALSE	FALSE	FALSE
20200205_TTNGFP_D4_GATA6ChIP_001_peak_11131	chr16	32352334	32352529	196	*	13.2	+	Distal Intergenic	16	32300868	32301302	435	2	390705	uc021tgz.1	-51032	NA	LOC390705	protein phosphatase 2 regulatory subunit B'', beta pseudogene	FALSE	FALSE	FALSE	FALSE	FALSE	FALSE
20200205_TTNGFP_D4_GATA6ChIP_001_peak_11136	chr16	32485492	32486132	641	*	46.6	+	Distal Intergenic	16	32300868	32301302	435	2	390705	uc021tgz.1	-184190	NA	LOC390705	protein phosphatase 2 regulatory subunit B'', beta pseudogene	FALSE	FALSE	FALSE	FALSE	FALSE	FALSE
20200205_TTNGFP_D4_GATA6ChIP_001_peak_11137	chr16	32488319	32488592	274	*	22.9	+	Distal Intergenic	16	32300868	32301302	435	2	390705	uc021tgz.1	-187017	NA	LOC390705	protein phosphatase 2 regulatory subunit B'', beta pseudogene	FALSE	FALSE	FALSE	FALSE	FALSE	FALSE
20200205_TTNGFP_D4_GATA6ChIP_001_peak_11139	chr16	32879873	32880023	151	*	9.8	+	Distal Intergenic	16	32888797	32891922	3126	2	386757	uc002edh.1	11899	ENSG00000214617	SLC6A10P	solute carrier family 6 member 10, pseudogene	FALSE	FALSE	FALSE	FALSE	FALSE	FALSE
20200205_TTNGFP_D4_GATA6ChIP_001_peak_11142	chr16	32890824	32890957	134	*	10.3	+	Promoter (<=1kb)	16	32888797	32891922	3126	2	386757	uc002edh.1	965	ENSG00000214617	SLC6A10P	solute carrier family 6 member 10, pseudogene	FALSE	FALSE	FALSE	FALSE	FALSE	FALSE
20200205_TTNGFP_D4_GATA6ChIP_001_peak_11143	chr16	32933514	32933650	137	*	9.5	+	Intron (uc021thc.2/uc021thc.2, intron 4 of 8)	16	32888797	32896463	7667	2	386757	uc002edi.1	-37051	ENSG00000214617	SLC6A10P	solute carrier family 6 member 10, pseudogene	TRUE	FALSE	FALSE	FALSE	FALSE	FALSE
20200205_TTNGFP_D4_GATA6ChIP_001_peak_11144	chr16	33040475	33040628	154	*	17.9	+	Intron (uc021thc.2/uc021thc.2, intron 6 of 8)	16	32888797	32896463	7667	2	386757	uc002edi.1	-144012	ENSG00000214617	SLC6A10P	solute carrier family 6 member 10, pseudogene	FALSE	FALSE	FALSE	FALSE	FALSE	FALSE
20200205_TTNGFP_D4_GATA6ChIP_001_peak_11145	chr16	33106937	33107054	118	*	9.7	+	Intron (uc021thc.2/uc021thc.2, intron 8 of 8)	16	33205585	33208179	2595	1	24150	uc002edn.4	-98531	ENSG00000183632	TP53TG3	TP53 target 3	FALSE	FALSE	FALSE	FALSE	FALSE	FALSE
20200205_TTNGFP_D4_GATA6ChIP_001_peak_11146	chr16	33237321	33237702	382	*	18.6	+	Distal Intergenic	16	33262120	33264719	2600	1	729355	uc002edp.4	-24418	ENSG00000261509	TP53TG3B	TP53 target 3B	FALSE	FALSE	FALSE	FALSE	FALSE	FALSE
20200205_TTNGFP_D4_GATA6ChIP_001_peak_11150	chr16	33240181	33240567	387	*	8	+	Distal Intergenic	16	33262120	33264719	2600	1	729355	uc002edp.4	-21553	ENSG00000261509	TP53TG3B	TP53 target 3B	FALSE	FALSE	FALSE	FALSE	FALSE	FALSE
20200205_TTNGFP_D4_GATA6ChIP_001_peak_11151	chr16	33240840	33241228	389	*	41.8	+	Distal Intergenic	16	33262120	33264719	2600	1	729355	uc002edp.4	-20892	ENSG00000261509	TP53TG3B	TP53 target 3B	FALSE	FALSE	FALSE	FALSE	FALSE	TRUE
20200205_TTNGFP_D4_GATA6ChIP_001_peak_11153	chr16	33294590	33294762	173	*	11.5	+	Distal Intergenic	16	33298268	33298702	435	2	390705	uc021thh.1	3940	NA	LOC390705	protein phosphatase 2 regulatory subunit B'', beta pseudogene	FALSE	FALSE	FALSE	FALSE	FALSE	FALSE
20200205_TTNGFP_D4_GATA6ChIP_001_peak_11154	chr16	33297506	33297658	153	*	6.1	+	Promoter (1-2kb)	16	33298268	33298702	435	2	390705	uc021thh.1	1044	NA	LOC390705	protein phosphatase 2 regulatory subunit B'', beta pseudogene	FALSE	FALSE	FALSE	FALSE	FALSE	FALSE
20200205_TTNGFP_D4_GATA6ChIP_001_peak_11156	chr16	33345217	33345657	441	*	25.6	+	Distal Intergenic	16	33298268	33298702	435	2	390705	uc021thh.1	-46515	NA	LOC390705	protein phosphatase 2 regulatory subunit B'', beta pseudogene	TRUE	FALSE	FALSE	FALSE	FALSE	FALSE
20200205_TTNGFP_D4_GATA6ChIP_001_peak_11159	chr16	33350568	33350920	353	*	43	+	Distal Intergenic	16	33298268	33298702	435	2	390705	uc021thh.1	-51866	NA	LOC390705	protein phosphatase 2 regulatory subunit B'', beta pseudogene	FALSE	FALSE	FALSE	FALSE	FALSE	FALSE
20200205_TTNGFP_D4_GATA6ChIP_001_peak_11163	chr16	33374180	33374349	170	*	33.6	+	Distal Intergenic	16	33298268	33298702	435	2	390705	uc021thh.1	-75478	NA	LOC390705	protein phosphatase 2 regulatory subunit B'', beta pseudogene	FALSE	FALSE	FALSE	FALSE	FALSE	FALSE
20200205_TTNGFP_D4_GATA6ChIP_001_peak_11168	chr16	33513154	33513293	140	*	16.8	+	Distal Intergenic	16	33298268	33298702	435	2	390705	uc021thh.1	-214452	NA	LOC390705	protein phosphatase 2 regulatory subunit B'', beta pseudogene	FALSE	FALSE	FALSE	FALSE	FALSE	FALSE
20200205_TTNGFP_D4_GATA6ChIP_001_peak_11170	chr16	33515791	33516169	379	*	32.7	+	Distal Intergenic	16	33298268	33298702	435	2	390705	uc021thh.1	-217089	NA	LOC390705	protein phosphatase 2 regulatory subunit B'', beta pseudogene	FALSE	FALSE	FALSE	FALSE	FALSE	FALSE
20200205_TTNGFP_D4_GATA6ChIP_001_peak_11171	chr16	33569858	33570098	241	*	24.2	+	Distal Intergenic	16	33298268	33298702	435	2	390705	uc021thh.1	-271156	NA	LOC390705	protein phosphatase 2 regulatory subunit B'', beta pseudogene	FALSE	FALSE	FALSE	FALSE	FALSE	FALSE
20200205_TTNGFP_D4_GATA6ChIP_001_peak_11172	chr16	33570378	33570606	229	*	19.2	+	Distal Intergenic	16	33298268	33298702	435	2	390705	uc021thh.1	-271676	NA	LOC390705	protein phosphatase 2 regulatory subunit B'', beta pseudogene	FALSE	FALSE	FALSE	FALSE	FALSE	FALSE
20200205_TTNGFP_D4_GATA6ChIP_001_peak_11174	chr16	33573655	33573884	230	*	22.1	+	Intron (uc031qwb.1/uc031qwb.1, intron 1 of 2)	16	33298268	33298702	435	2	390705	uc021thh.1	-274953	NA	LOC390705	protein phosphatase 2 regulatory subunit B'', beta pseudogene	FALSE	FALSE	FALSE	FALSE	FALSE	FALSE
20200205_TTNGFP_D4_GATA6ChIP_001_peak_11176	chr16	33627141	33627720	580	*	43.4	+	Distal Intergenic	16	33298268	33298702	435	2	390705	uc021thh.1	-328439	NA	LOC390705	protein phosphatase 2 regulatory subunit B'', beta pseudogene	TRUE	FALSE	FALSE	FALSE	FALSE	FALSE
20200205_TTNGFP_D4_GATA6ChIP_001_peak_11177	chr16	33718106	33718277	172	*	13.3	+	Distal Intergenic	16	33961052	33962503	1452	2	649159	uc021thl.1	244226	NA	LINC00273	long intergenic non-protein coding RNA 273	FALSE	FALSE	FALSE	TRUE	FALSE	FALSE
20200205_TTNGFP_D4_GATA6ChIP_001_peak_11178	chr16	33943116	33943703	588	*	66.5	+	Distal Intergenic	16	33961052	33962503	1452	2	649159	uc021thl.1	18800	NA	LINC00273	long intergenic non-protein coding RNA 273	FALSE	FALSE	FALSE	TRUE	TRUE	TRUE
20200205_TTNGFP_D4_GATA6ChIP_001_peak_11179	chr16	33944115	33944485	371	*	47.7	+	Distal Intergenic	16	33961052	33962503	1452	2	649159	uc021thl.1	18018	NA	LINC00273	long intergenic non-protein coding RNA 273	FALSE	FALSE	FALSE	TRUE	TRUE	FALSE
20200205_TTNGFP_D4_GATA6ChIP_001_peak_1118	chr1	18004221	18004395	175	*	15.1	+	Intron (uc009vpe.1/55160, intron 25 of 26)	1	18020542	18024370	3829	1	55160	uc001bas.3	-16147	ENSG00000074964	ARHGEF10L	Rho guanine nucleotide exchange factor 10 like	TRUE	FALSE	FALSE	FALSE	FALSE	FALSE
20200205_TTNGFP_D4_GATA6ChIP_001_peak_11180	chr16	33955836	33956147	312	*	45.7	+	Distal Intergenic	16	33961052	33962503	1452	2	649159	uc021thl.1	6356	NA	LINC00273	long intergenic non-protein coding RNA 273	FALSE	FALSE	FALSE	TRUE	FALSE	FALSE
20200205_TTNGFP_D4_GATA6ChIP_001_peak_11183	chr16	33965135	33966442	1308	*	257.6	+	Promoter (2-3kb)	16	33961052	33962503	1452	2	649159	uc021thl.1	-2632	NA	LINC00273	long intergenic non-protein coding RNA 273	FALSE	FALSE	FALSE	TRUE	FALSE	FALSE
20200205_TTNGFP_D4_GATA6ChIP_001_peak_11186	chr16	34377995	34378163	169	*	15.7	+	Distal Intergenic	16	34403802	34404762	961	2	606551	uc002edv.1	26599	NA	UBE2MP1	ubiquitin conjugating enzyme E2 M pseudogene 1	FALSE	FALSE	FALSE	FALSE	FALSE	FALSE
20200205_TTNGFP_D4_GATA6ChIP_001_peak_11187	chr16	34378286	34378444	159	*	14.5	+	Distal Intergenic	16	34403802	34404762	961	2	606551	uc002edv.1	26318	NA	UBE2MP1	ubiquitin conjugating enzyme E2 M pseudogene 1	FALSE	FALSE	FALSE	FALSE	FALSE	FALSE
20200205_TTNGFP_D4_GATA6ChIP_001_peak_11188	chr16	34383140	34383304	165	*	15.3	+	Distal Intergenic	16	34403802	34404762	961	2	606551	uc002edv.1	21458	NA	UBE2MP1	ubiquitin conjugating enzyme E2 M pseudogene 1	FALSE	FALSE	FALSE	FALSE	FALSE	FALSE
20200205_TTNGFP_D4_GATA6ChIP_001_peak_11189	chr16	34410955	34411072	118	*	8.8	+	Promoter (6-7kb)	16	34403802	34404762	961	2	606551	uc002edv.1	-6193	NA	UBE2MP1	ubiquitin conjugating enzyme E2 M pseudogene 1	TRUE	FALSE	FALSE	FALSE	FALSE	FALSE
20200205_TTNGFP_D4_GATA6ChIP_001_peak_1119	chr1	18015668	18015803	136	*	14.5	+	Promoter (4-5kb)	1	18020542	18024370	3829	1	55160	uc001bas.3	-4739	ENSG00000074964	ARHGEF10L	Rho guanine nucleotide exchange factor 10 like	FALSE	FALSE	FALSE	FALSE	FALSE	FALSE
20200205_TTNGFP_D4_GATA6ChIP_001_peak_11191	chr16	34451423	34451544	122	*	6.2	+	Distal Intergenic	16	34403802	34404762	961	2	606551	uc002edv.1	-46661	NA	UBE2MP1	ubiquitin conjugating enzyme E2 M pseudogene 1	FALSE	FALSE	FALSE	FALSE	FALSE	FALSE
20200205_TTNGFP_D4_GATA6ChIP_001_peak_11193	chr16	34578508	34578781	274	*	17	+	Distal Intergenic	16	34597787	34626084	28298	1	283914	uc010vgc.1	-19006	ENSG00000259841	LINC01566	long intergenic non-protein coding RNA 1566	FALSE	FALSE	FALSE	FALSE	FALSE	FALSE
20200205_TTNGFP_D4_GATA6ChIP_001_peak_11195	chr16	34726818	34726975	158	*	12.3	+	Distal Intergenic	16	34711785	34714967	3183	2	146481	uc010vgd.1	-11851	NA	FRG2DP	FSHD region gene 2 family member D, pseudogene	FALSE	FALSE	FALSE	FALSE	FALSE	FALSE
20200205_TTNGFP_D4_GATA6ChIP_001_peak_11197	chr16	34809253	34809518	266	*	14.2	+	Distal Intergenic	16	34739459	34740840	1382	2	100130700	uc021tho.1	-68413	NA	TP53TG3HP	TP53 target 3 family member H, pseudogene	FALSE	FALSE	FALSE	FALSE	FALSE	FALSE
20200205_TTNGFP_D4_GATA6ChIP_001_peak_11198	chr16	34984610	34984756	147	*	11.2	+	Intron (uc002edz.1/400533, intron 2 of 2)	16	34980923	34990995	10073	1	400533	uc002edz.1	3687	ENSG00000261122	LINC02167	long intergenic non-protein coding RNA 2167	FALSE	FALSE	FALSE	FALSE	FALSE	FALSE
20200205_TTNGFP_D4_GATA6ChIP_001_peak_11199	chr16	35027296	35027523	228	*	15.1	+	Distal Intergenic	16	34980923	34990995	10073	1	400533	uc002edz.1	46373	ENSG00000261122	LINC02167	long intergenic non-protein coding RNA 2167	FALSE	FALSE	FALSE	FALSE	FALSE	FALSE
20200205_TTNGFP_D4_GATA6ChIP_001_peak_11201	chr16	46780932	46781341	410	*	26.2	+	Promoter (<=1kb)	16	46736194	46782221	46028	2	91807	uc002eei.4	880	ENSG00000140795	MYLK3	myosin light chain kinase 3	FALSE	TRUE	TRUE	TRUE	TRUE	TRUE
20200205_TTNGFP_D4_GATA6ChIP_001_peak_11202	chr16	46782076	46782569	494	*	59.5	+	Promoter (<=1kb)	16	46736194	46782221	46028	2	91807	uc002eei.4	0	ENSG00000140795	MYLK3	myosin light chain kinase 3	TRUE	TRUE	TRUE	TRUE	TRUE	TRUE
20200205_TTNGFP_D4_GATA6ChIP_001_peak_11203	chr16	46791102	46792043	942	*	375.2	+	Intron (uc010vge.2/91807, intron 1 of 11)	16	46736194	46797158	60965	2	91807	uc010vge.2	5115	ENSG00000140795	MYLK3	myosin light chain kinase 3	TRUE	TRUE	TRUE	TRUE	TRUE	TRUE
20200205_TTNGFP_D4_GATA6ChIP_001_peak_11204	chr16	46812300	46812541	242	*	18.8	+	Distal Intergenic	16	46736194	46797158	60965	2	91807	uc010vge.2	-15142	ENSG00000140795	MYLK3	myosin light chain kinase 3	FALSE	TRUE	TRUE	TRUE	FALSE	FALSE
20200205_TTNGFP_D4_GATA6ChIP_001_peak_1121	chr1	18027797	18028473	677	*	113.2	+	Distal Intergenic	1	18020542	18024370	3829	1	55160	uc001bas.3	7255	ENSG00000074964	ARHGEF10L	Rho guanine nucleotide exchange factor 10 like	FALSE	FALSE	FALSE	FALSE	TRUE	TRUE
20200205_TTNGFP_D4_GATA6ChIP_001_peak_11210	chr16	47048325	47048519	195	*	15.6	+	Distal Intergenic	16	46989274	47007625	18352	2	10294	uc002eeo.2	-40700	ENSG00000069345	DNAJA2	DnaJ heat shock protein family (Hsp40) member A2	FALSE	FALSE	FALSE	FALSE	FALSE	FALSE
20200205_TTNGFP_D4_GATA6ChIP_001_peak_11211	chr16	47071311	47071580	270	*	18.2	+	Distal Intergenic	16	46989274	47007625	18352	2	10294	uc002eeo.2	-63686	ENSG00000069345	DNAJA2	DnaJ heat shock protein family (Hsp40) member A2	TRUE	FALSE	FALSE	FALSE	FALSE	FALSE
20200205_TTNGFP_D4_GATA6ChIP_001_peak_11212	chr16	47083095	47083276	182	*	19.2	+	Distal Intergenic	16	47115431	47143622	28192	2	81831	uc002eeq.2	60346	ENSG00000171208	NETO2	neuropilin and tolloid like 2	FALSE	FALSE	FALSE	FALSE	FALSE	FALSE
20200205_TTNGFP_D4_GATA6ChIP_001_peak_11213	chr16	47089118	47089336	219	*	14.8	+	Distal Intergenic	16	47115431	47143622	28192	2	81831	uc002eeq.2	54286	ENSG00000171208	NETO2	neuropilin and tolloid like 2	FALSE	FALSE	FALSE	FALSE	FALSE	FALSE
20200205_TTNGFP_D4_GATA6ChIP_001_peak_11214	chr16	47615615	47615842	228	*	14.4	+	Intron (uc002eeu.4/5257, intron 9 of 31)	16	47699183	47735434	36252	1	5257	uc002eew.4	-83341	ENSG00000102893	PHKB	phosphorylase kinase regulatory subunit beta	FALSE	FALSE	FALSE	FALSE	FALSE	FALSE
20200205_TTNGFP_D4_GATA6ChIP_001_peak_11215	chr16	47670372	47670556	185	*	16	+	Intron (uc002eeu.4/5257, intron 15 of 31)	16	47699183	47735434	36252	1	5257	uc002eew.4	-28627	ENSG00000102893	PHKB	phosphorylase kinase regulatory subunit beta	FALSE	FALSE	FALSE	FALSE	FALSE	FALSE
20200205_TTNGFP_D4_GATA6ChIP_001_peak_11216	chr16	47983302	47983440	139	*	24.7	+	Distal Intergenic	16	48116884	48180385	63502	2	94160	uc002eey.1	196945	ENSG00000140798	ABCC12	ATP binding cassette subfamily C member 12	FALSE	FALSE	FALSE	FALSE	FALSE	FALSE
20200205_TTNGFP_D4_GATA6ChIP_001_peak_11217	chr16	48419657	48419792	136	*	7.3	+	Promoter (<=1kb)	16	48394446	48419229	24784	2	6477	uc002efo.1	-428	ENSG00000196470	SIAH1	siah E3 ubiquitin protein ligase 1	FALSE	FALSE	FALSE	FALSE	FALSE	FALSE
20200205_TTNGFP_D4_GATA6ChIP_001_peak_11221	chr16	48579038	48579221	184	*	10.7	+	Intron (uc002efp.3/9683, intron 6 of 6)	16	48572637	48644120	71484	2	9683	uc002efp.3	64899	ENSG00000102921	N4BP1	NEDD4 binding protein 1	TRUE	FALSE	FALSE	FALSE	FALSE	FALSE
20200205_TTNGFP_D4_GATA6ChIP_001_peak_11223	chr16	49445650	49445844	195	*	14.4	+	Distal Intergenic	16	49407808	49433319	25512	1	123970	uc002efr.3	37842	ENSG00000166152	C16orf78	chromosome 16 open reading frame 78	TRUE	FALSE	FALSE	FALSE	FALSE	FALSE
20200205_TTNGFP_D4_GATA6ChIP_001_peak_11224	chr16	49506552	49506691	140	*	8.6	+	Distal Intergenic	16	49407808	49433319	25512	1	123970	uc002efr.3	98744	ENSG00000166152	C16orf78	chromosome 16 open reading frame 78	FALSE	FALSE	FALSE	FALSE	FALSE	FALSE
20200205_TTNGFP_D4_GATA6ChIP_001_peak_11226	chr16	49544546	49544672	127	*	14.4	+	Intron (uc010vgn.3/23090, intron 5 of 5)	16	49407808	49433319	25512	1	123970	uc002efr.3	136738	ENSG00000166152	C16orf78	chromosome 16 open reading frame 78	FALSE	FALSE	FALSE	FALSE	FALSE	FALSE
20200205_TTNGFP_D4_GATA6ChIP_001_peak_11227	chr16	49557523	49557722	200	*	13.8	+	Exon (uc010vgn.3/23090, exon 5 of 6)	16	49524515	49698136	173622	2	23090	uc010vgn.3	140414	ENSG00000102935	ZNF423	zinc finger protein 423	FALSE	FALSE	TRUE	FALSE	FALSE	FALSE
20200205_TTNGFP_D4_GATA6ChIP_001_peak_11228	chr16	49559004	49559148	145	*	16	+	Intron (uc010vgn.3/23090, intron 4 of 5)	16	49524515	49698136	173622	2	23090	uc010vgn.3	138988	ENSG00000102935	ZNF423	zinc finger protein 423	FALSE	FALSE	TRUE	FALSE	FALSE	FALSE
20200205_TTNGFP_D4_GATA6ChIP_001_peak_1123	chr1	18055725	18055909	185	*	19.1	+	Distal Intergenic	1	18081808	18153558	71751	1	81569	uc001bat.3	-25899	ENSG00000117148	ACTL8	actin like 8	FALSE	FALSE	FALSE	FALSE	FALSE	FALSE
20200205_TTNGFP_D4_GATA6ChIP_001_peak_11231	chr16	49732198	49732683	486	*	94.5	+	Intron (uc031qwd.1/23090, intron 3 of 7)	16	49524515	49698136	173622	2	23090	uc010vgn.3	-34062	ENSG00000102935	ZNF423	zinc finger protein 423	TRUE	FALSE	TRUE	FALSE	FALSE	TRUE
20200205_TTNGFP_D4_GATA6ChIP_001_peak_11232	chr16	49761559	49761727	169	*	12.6	+	Intron (uc031qwd.1/23090, intron 3 of 7)	16	49524515	49698136	173622	2	23090	uc010vgn.3	-63423	ENSG00000102935	ZNF423	zinc finger protein 423	FALSE	FALSE	TRUE	FALSE	FALSE	FALSE
20200205_TTNGFP_D4_GATA6ChIP_001_peak_11233	chr16	49777666	49777790	125	*	17.3	+	Intron (uc031qwd.1/23090, intron 2 of 7)	16	49524515	49856649	332135	2	23090	uc031qwd.1	78859	ENSG00000102935	ZNF423	zinc finger protein 423	FALSE	FALSE	TRUE	FALSE	FALSE	FALSE
20200205_TTNGFP_D4_GATA6ChIP_001_peak_11235	chr16	49788933	49789148	216	*	15.1	+	Intron (uc031qwd.1/23090, intron 2 of 7)	16	49524515	49856649	332135	2	23090	uc031qwd.1	67501	ENSG00000102935	ZNF423	zinc finger protein 423	FALSE	FALSE	TRUE	FALSE	TRUE	TRUE
20200205_TTNGFP_D4_GATA6ChIP_001_peak_11236	chr16	49808038	49808221	184	*	17.4	+	Intron (uc031qwd.1/23090, intron 2 of 7)	16	49524515	49856649	332135	2	23090	uc031qwd.1	48428	ENSG00000102935	ZNF423	zinc finger protein 423	FALSE	FALSE	TRUE	FALSE	FALSE	FALSE
20200205_TTNGFP_D4_GATA6ChIP_001_peak_11238	chr16	49915085	49915224	140	*	10.3	+	Distal Intergenic	16	49524515	49891830	367316	2	23090	uc031qwe.1	-23255	ENSG00000102935	ZNF423	zinc finger protein 423	FALSE	FALSE	TRUE	FALSE	FALSE	FALSE
20200205_TTNGFP_D4_GATA6ChIP_001_peak_11239	chr16	49920400	49920750	351	*	34.5	+	Distal Intergenic	16	49524515	49891830	367316	2	23090	uc031qwe.1	-28570	ENSG00000102935	ZNF423	zinc finger protein 423	TRUE	FALSE	TRUE	FALSE	FALSE	TRUE
20200205_TTNGFP_D4_GATA6ChIP_001_peak_11240	chr16	50280265	50280527	263	*	14.8	+	Distal Intergenic	16	50300462	50338870	38409	1	113	uc002egb.1	-19935	ENSG00000121281	ADCY7	adenylate cyclase 7	TRUE	FALSE	TRUE	FALSE	TRUE	TRUE
20200205_TTNGFP_D4_GATA6ChIP_001_peak_11241	chr16	50283980	50284166	187	*	12.7	+	Distal Intergenic	16	50300462	50338870	38409	1	113	uc002egb.1	-16296	ENSG00000121281	ADCY7	adenylate cyclase 7	TRUE	FALSE	TRUE	FALSE	FALSE	FALSE
20200205_TTNGFP_D4_GATA6ChIP_001_peak_11242	chr16	50285714	50286068	355	*	22.1	+	Distal Intergenic	16	50300462	50338870	38409	1	113	uc002egb.1	-14394	ENSG00000121281	ADCY7	adenylate cyclase 7	FALSE	FALSE	TRUE	FALSE	FALSE	FALSE
20200205_TTNGFP_D4_GATA6ChIP_001_peak_11245	chr16	50332971	50333307	337	*	22.7	+	Intron (uc002egb.1/113, intron 8 of 11)	16	50321823	50352043	30221	1	113	uc002egd.1	11148	ENSG00000121281	ADCY7	adenylate cyclase 7	FALSE	FALSE	TRUE	FALSE	FALSE	FALSE
20200205_TTNGFP_D4_GATA6ChIP_001_peak_11246	chr16	50333567	50333841	275	*	19.1	+	Intron (uc002egb.1/113, intron 8 of 11)	16	50321823	50352043	30221	1	113	uc002egd.1	11744	ENSG00000121281	ADCY7	adenylate cyclase 7	FALSE	FALSE	TRUE	FALSE	FALSE	FALSE
20200205_TTNGFP_D4_GATA6ChIP_001_peak_11247	chr16	50334803	50334949	147	*	12.9	+	Intron (uc002egb.1/113, intron 9 of 11)	16	50321823	50352043	30221	1	113	uc002egd.1	12980	ENSG00000121281	ADCY7	adenylate cyclase 7	FALSE	FALSE	TRUE	FALSE	FALSE	FALSE
20200205_TTNGFP_D4_GATA6ChIP_001_peak_11248	chr16	50337805	50337956	152	*	14.2	+	Intron (uc002egb.1/113, intron 10 of 11)	16	50321823	50352043	30221	1	113	uc002egd.1	15982	ENSG00000121281	ADCY7	adenylate cyclase 7	FALSE	FALSE	TRUE	FALSE	FALSE	FALSE
20200205_TTNGFP_D4_GATA6ChIP_001_peak_11250	chr16	50347645	50348239	595	*	45.1	+	Exon (uc002egd.1/113, exon 22 of 25)	16	50321823	50352043	30221	1	113	uc002egd.1	25822	ENSG00000121281	ADCY7	adenylate cyclase 7	TRUE	FALSE	TRUE	FALSE	FALSE	TRUE
20200205_TTNGFP_D4_GATA6ChIP_001_peak_11251	chr16	50406875	50407330	456	*	28.2	+	Promoter (4-5kb)	16	50352929	50402845	49917	2	29117	uc021thx.1	-4030	ENSG00000166164	BRD7	bromodomain containing 7	FALSE	FALSE	FALSE	FALSE	FALSE	TRUE
20200205_TTNGFP_D4_GATA6ChIP_001_peak_11253	chr16	50488398	50488531	134	*	16.7	+	Distal Intergenic	16	50352929	50402845	49917	2	29117	uc021thx.1	-85553	ENSG00000166164	BRD7	bromodomain containing 7	FALSE	FALSE	FALSE	FALSE	FALSE	FALSE
20200205_TTNGFP_D4_GATA6ChIP_001_peak_11254	chr16	50503939	50504212	274	*	20.4	+	Distal Intergenic	16	50582241	50674771	92531	1	85407	uc002egg.2	-78029	ENSG00000140807	NKD1	NKD inhibitor of WNT signaling pathway 1	FALSE	TRUE	TRUE	FALSE	FALSE	TRUE
20200205_TTNGFP_D4_GATA6ChIP_001_peak_11255	chr16	50613078	50613399	322	*	20.9	+	Intron (uc002egg.2/85407, intron 3 of 9)	16	50582241	50674771	92531	1	85407	uc002egg.2	30837	ENSG00000140807	NKD1	NKD inhibitor of WNT signaling pathway 1	FALSE	TRUE	TRUE	FALSE	FALSE	FALSE
20200205_TTNGFP_D4_GATA6ChIP_001_peak_11256	chr16	50626118	50626256	139	*	10.1	+	Intron (uc002egg.2/85407, intron 3 of 9)	16	50582241	50674771	92531	1	85407	uc002egg.2	43877	ENSG00000140807	NKD1	NKD inhibitor of WNT signaling pathway 1	FALSE	TRUE	TRUE	FALSE	FALSE	FALSE
20200205_TTNGFP_D4_GATA6ChIP_001_peak_11257	chr16	50632492	50632695	204	*	17.1	+	Intron (uc002egg.2/85407, intron 3 of 9)	16	50582241	50674771	92531	1	85407	uc002egg.2	50251	ENSG00000140807	NKD1	NKD inhibitor of WNT signaling pathway 1	TRUE	TRUE	TRUE	FALSE	FALSE	FALSE
20200205_TTNGFP_D4_GATA6ChIP_001_peak_11258	chr16	50655436	50655560	125	*	13.9	+	Exon (uc002egg.2/85407, exon 5 of 10)	16	50700211	50715264	15054	2	124460	uc002egi.3	59704	ENSG00000167208	SNX20	sorting nexin 20	FALSE	FALSE	FALSE	FALSE	FALSE	FALSE
20200205_TTNGFP_D4_GATA6ChIP_001_peak_11259	chr16	50657789	50657993	205	*	16.2	+	Intron (uc002egg.2/85407, intron 5 of 9)	16	50700211	50715264	15054	2	124460	uc002egi.3	57271	ENSG00000167208	SNX20	sorting nexin 20	FALSE	FALSE	FALSE	FALSE	FALSE	FALSE
20200205_TTNGFP_D4_GATA6ChIP_001_peak_1126	chr1	18077060	18077254	195	*	20.3	+	Promoter (4-5kb)	1	18081808	18153558	71751	1	81569	uc001bat.3	-4554	ENSG00000117148	ACTL8	actin like 8	TRUE	FALSE	FALSE	FALSE	FALSE	FALSE
20200205_TTNGFP_D4_GATA6ChIP_001_peak_11261	chr16	50745821	50746013	193	*	13.5	+	Promoter (<=1kb)	16	50746105	50757295	11191	1	64127	uc010cbp.1	-92	ENSG00000167207	NOD2	nucleotide binding oligomerization domain containing 2	FALSE	FALSE	FALSE	FALSE	FALSE	FALSE
20200205_TTNGFP_D4_GATA6ChIP_001_peak_11262	chr16	50875097	50875292	196	*	17.6	+	Distal Intergenic	16	50821697	50826616	4920	1	1540	uc021tic.1	53400	ENSG00000083799	CYLD	CYLD lysine 63 deubiquitinase	TRUE	FALSE	FALSE	FALSE	TRUE	TRUE
20200205_TTNGFP_D4_GATA6ChIP_001_peak_11263	chr16	51184222	51184430	209	*	9.1	+	Promoter (<=1kb)	16	51169886	51184508	14623	2	6299	uc021tid.1	78	ENSG00000103449	SALL1	spalt like transcription factor 1	TRUE	FALSE	TRUE	FALSE	FALSE	FALSE
20200205_TTNGFP_D4_GATA6ChIP_001_peak_11265	chr16	51456060	51456370	311	*	14.4	+	Distal Intergenic	16	51171023	51185183	14161	2	6299	uc021tif.1	-270877	ENSG00000103449	SALL1	spalt like transcription factor 1	FALSE	FALSE	TRUE	FALSE	FALSE	FALSE
20200205_TTNGFP_D4_GATA6ChIP_001_peak_11266	chr16	51483089	51483215	127	*	11.7	+	Distal Intergenic	16	51171023	51185183	14161	2	6299	uc021tif.1	-297906	ENSG00000103449	SALL1	spalt like transcription factor 1	TRUE	FALSE	TRUE	FALSE	FALSE	FALSE
20200205_TTNGFP_D4_GATA6ChIP_001_peak_11267	chr16	51685322	51685447	126	*	12.4	+	Distal Intergenic	16	52060264	52107847	47584	2	388276	uc021tih.1	422400	ENSG00000261190	C16orf97	chromosome 16 open reading frame 97	FALSE	FALSE	FALSE	FALSE	FALSE	FALSE
20200205_TTNGFP_D4_GATA6ChIP_001_peak_11268	chr16	51801559	51801831	273	*	36	+	Distal Intergenic	16	52060264	52107847	47584	2	388276	uc021tih.1	306016	ENSG00000261190	C16orf97	chromosome 16 open reading frame 97	FALSE	FALSE	FALSE	FALSE	TRUE	TRUE
20200205_TTNGFP_D4_GATA6ChIP_001_peak_1127	chr1	18089086	18089313	228	*	12.4	+	Intron (uc001bat.3/81569, intron 1 of 2)	1	18081808	18153558	71751	1	81569	uc001bat.3	7278	ENSG00000117148	ACTL8	actin like 8	FALSE	FALSE	FALSE	FALSE	FALSE	FALSE
20200205_TTNGFP_D4_GATA6ChIP_001_peak_11270	chr16	53089057	53089340	284	*	19.4	+	Promoter (<=1kb)	16	53088945	53361414	272470	1	80205	uc002egy.3	112	ENSG00000177200	CHD9	chromodomain helicase DNA binding protein 9	TRUE	FALSE	FALSE	FALSE	FALSE	FALSE
20200205_TTNGFP_D4_GATA6ChIP_001_peak_11271	chr16	53356271	53356391	121	*	10.6	+	Intron (uc002egy.3/80205, intron 38 of 38)	16	53403274	53405041	1768	2	643802	uc021tik.1	48650	ENSG00000260078	LOC643802	u3 small nucleolar ribonucleoprotein protein MPP10-like	FALSE	FALSE	FALSE	FALSE	FALSE	FALSE
20200205_TTNGFP_D4_GATA6ChIP_001_peak_11272	chr16	54212514	54212979	466	*	31.5	+	Distal Intergenic	16	54317212	54320378	3167	2	79191	uc002eht.1	107399	ENSG00000177508	IRX3	iroquois homeobox 3	TRUE	FALSE	FALSE	FALSE	TRUE	TRUE
20200205_TTNGFP_D4_GATA6ChIP_001_peak_11273	chr16	54250896	54251132	237	*	12.6	+	Distal Intergenic	16	54317212	54320378	3167	2	79191	uc002eht.1	69246	ENSG00000177508	IRX3	iroquois homeobox 3	FALSE	FALSE	FALSE	FALSE	FALSE	FALSE
20200205_TTNGFP_D4_GATA6ChIP_001_peak_11274	chr16	54269286	54269557	272	*	25.7	+	Distal Intergenic	16	54317212	54320378	3167	2	79191	uc002eht.1	50821	ENSG00000177508	IRX3	iroquois homeobox 3	TRUE	FALSE	FALSE	FALSE	TRUE	TRUE
20200205_TTNGFP_D4_GATA6ChIP_001_peak_11275	chr16	54278315	54278561	247	*	25.7	+	Distal Intergenic	16	54317212	54320378	3167	2	79191	uc002eht.1	41817	ENSG00000177508	IRX3	iroquois homeobox 3	TRUE	FALSE	FALSE	FALSE	TRUE	TRUE
20200205_TTNGFP_D4_GATA6ChIP_001_peak_11276	chr16	54325707	54325880	174	*	16.3	+	Promoter (5-6kb)	16	54317212	54320378	3167	2	79191	uc002eht.1	-5329	ENSG00000177508	IRX3	iroquois homeobox 3	TRUE	FALSE	FALSE	FALSE	FALSE	FALSE
20200205_TTNGFP_D4_GATA6ChIP_001_peak_11277	chr16	54364860	54365035	176	*	13.3	+	Distal Intergenic	16	54317212	54320378	3167	2	79191	uc002eht.1	-44482	ENSG00000177508	IRX3	iroquois homeobox 3	FALSE	FALSE	FALSE	FALSE	FALSE	FALSE
20200205_TTNGFP_D4_GATA6ChIP_001_peak_11278	chr16	54392009	54392125	117	*	16	+	Distal Intergenic	16	54317212	54320378	3167	2	79191	uc002eht.1	-71631	ENSG00000177508	IRX3	iroquois homeobox 3	FALSE	FALSE	FALSE	FALSE	FALSE	FALSE
20200205_TTNGFP_D4_GATA6ChIP_001_peak_11279	chr16	54397875	54398306	432	*	48	+	Distal Intergenic	16	54317212	54320378	3167	2	79191	uc002eht.1	-77497	ENSG00000177508	IRX3	iroquois homeobox 3	TRUE	FALSE	FALSE	FALSE	TRUE	FALSE
20200205_TTNGFP_D4_GATA6ChIP_001_peak_1128	chr1	18117659	18117809	151	*	11.8	+	Intron (uc001bat.3/81569, intron 1 of 2)	1	18081808	18153558	71751	1	81569	uc001bat.3	35851	ENSG00000117148	ACTL8	actin like 8	FALSE	FALSE	FALSE	FALSE	FALSE	FALSE
20200205_TTNGFP_D4_GATA6ChIP_001_peak_11280	chr16	54404530	54404823	294	*	33.9	+	Distal Intergenic	16	54317212	54320378	3167	2	79191	uc002eht.1	-84152	ENSG00000177508	IRX3	iroquois homeobox 3	TRUE	FALSE	FALSE	FALSE	TRUE	TRUE
20200205_TTNGFP_D4_GATA6ChIP_001_peak_11281	chr16	54436326	54436455	130	*	7.3	+	Distal Intergenic	16	54317212	54320378	3167	2	79191	uc002eht.1	-115948	ENSG00000177508	IRX3	iroquois homeobox 3	FALSE	FALSE	FALSE	FALSE	FALSE	FALSE
20200205_TTNGFP_D4_GATA6ChIP_001_peak_11283	chr16	55514508	55514660	153	*	7.4	+	Promoter (<=1kb)	16	55514445	55540586	26142	1	4313	uc010vhd.2	63	ENSG00000087245	MMP2	matrix metallopeptidase 2	FALSE	TRUE	TRUE	TRUE	FALSE	TRUE
20200205_TTNGFP_D4_GATA6ChIP_001_peak_11284	chr16	55725598	55725777	180	*	12.3	+	Intron (uc002eif.3/6530, intron 5 of 14)	16	55719055	55737700	18646	1	6530	uc002eij.3	6543	ENSG00000103546	SLC6A2	solute carrier family 6 member 2	FALSE	FALSE	TRUE	FALSE	FALSE	FALSE
20200205_TTNGFP_D4_GATA6ChIP_001_peak_11285	chr16	56022711	56023339	629	*	22.7	+	Distal Intergenic	16	55880066	55989943	109878	2	221223	uc021tir.1	-32768	ENSG00000159398	CES5A	carboxylesterase 5A	TRUE	FALSE	FALSE	FALSE	FALSE	FALSE
20200205_TTNGFP_D4_GATA6ChIP_001_peak_11287	chr16	56336932	56337073	142	*	12	+	Intron (uc002eit.4/2775, intron 3 of 7)	16	56279432	56279535	104	1	100500891	uc021tis.1	57500	ENSG00000265281	MIR3935	microRNA 3935	FALSE	FALSE	FALSE	FALSE	FALSE	FALSE
20200205_TTNGFP_D4_GATA6ChIP_001_peak_11288	chr16	56354908	56355041	134	*	13.8	+	Intron (uc002eit.4/2775, intron 3 of 7)	16	56279432	56279535	104	1	100500891	uc021tis.1	75476	ENSG00000265281	MIR3935	microRNA 3935	FALSE	FALSE	FALSE	FALSE	FALSE	FALSE
20200205_TTNGFP_D4_GATA6ChIP_001_peak_11290	chr16	56373061	56373228	168	*	20.1	+	Intron (uc002eit.4/2775, intron 6 of 7)	16	56395364	56437030	41667	2	267	uc002eix.3	63802	ENSG00000159461	AMFR	autocrine motility factor receptor	FALSE	FALSE	FALSE	FALSE	FALSE	FALSE
20200205_TTNGFP_D4_GATA6ChIP_001_peak_11296	chr16	56386712	56387009	298	*	28.3	+	Intron (uc002eiu.4/2775, intron 7 of 8)	16	56395364	56437030	41667	2	267	uc002eix.3	50021	ENSG00000159461	AMFR	autocrine motility factor receptor	TRUE	FALSE	FALSE	FALSE	FALSE	FALSE
20200205_TTNGFP_D4_GATA6ChIP_001_peak_11298	chr16	56485012	56485508	497	*	37.5	+	Promoter (<=1kb)	16	56463048	56485261	22214	2	11051	uc002eja.3	0	ENSG00000167005	NUDT21	nudix hydrolase 21	TRUE	FALSE	FALSE	FALSE	TRUE	TRUE
20200205_TTNGFP_D4_GATA6ChIP_001_peak_113	chr1	1458032	1458281	250	*	11	+	Exon (uc001afz.2/55210, exon 8 of 16)	1	1447910	1470067	22158	1	55210	uc001agb.2	10122	ENSG00000197785	ATAD3A	ATPase family AAA domain containing 3A	FALSE	FALSE	FALSE	FALSE	FALSE	FALSE
20200205_TTNGFP_D4_GATA6ChIP_001_peak_1130	chr1	18151929	18152111	183	*	11.4	+	Intron (uc001bat.3/81569, intron 2 of 2)	1	18081808	18153558	71751	1	81569	uc001bat.3	70121	ENSG00000117148	ACTL8	actin like 8	FALSE	FALSE	FALSE	FALSE	FALSE	FALSE
20200205_TTNGFP_D4_GATA6ChIP_001_peak_11300	chr16	56553720	56553925	206	*	9.8	+	Promoter (<=1kb)	16	56518259	56554008	35750	2	583	uc002ejd.2	83	ENSG00000125124	BBS2	Bardet-Biedl syndrome 2	TRUE	FALSE	FALSE	FALSE	TRUE	TRUE
20200205_TTNGFP_D4_GATA6ChIP_001_peak_11301	chr16	56623169	56623387	219	*	12.1	+	Promoter (<=1kb)	16	56623267	56625000	1734	1	4504	uc002ejf.3	0	ENSG00000087250	MT3	metallothionein 3	FALSE	FALSE	FALSE	FALSE	FALSE	FALSE
20200205_TTNGFP_D4_GATA6ChIP_001_peak_11303	chr16	56660639	56660828	190	*	12.1	+	Promoter (1-2kb)	16	56659585	56661024	1440	1	4493	uc002ejm.3	1054	ENSG00000169715	MT1E	metallothionein 1E	FALSE	FALSE	FALSE	FALSE	FALSE	FALSE
20200205_TTNGFP_D4_GATA6ChIP_001_peak_11304	chr16	56681535	56681921	387	*	22.4	+	Distal Intergenic	16	56677716	56678853	1138	1	326343	uc010vhf.2	3819	NA	MT1DP	metallothionein 1D, pseudogene	TRUE	FALSE	FALSE	FALSE	FALSE	TRUE
20200205_TTNGFP_D4_GATA6ChIP_001_peak_11307	chr16	56910389	56910570	182	*	13.6	+	Intron (uc002ekd.4/6559, intron 8 of 25)	16	56899119	56949762	50644	1	6559	uc010ccn.3	11270	ENSG00000070915	SLC12A3	solute carrier family 12 member 3	FALSE	FALSE	FALSE	FALSE	FALSE	FALSE
20200205_TTNGFP_D4_GATA6ChIP_001_peak_11310	chr16	56919346	56919542	197	*	21.9	+	Intron (uc002ekd.4/6559, intron 15 of 25)	16	56899119	56949762	50644	1	6559	uc010ccn.3	20227	ENSG00000070915	SLC12A3	solute carrier family 12 member 3	FALSE	FALSE	FALSE	FALSE	FALSE	FALSE
20200205_TTNGFP_D4_GATA6ChIP_001_peak_11311	chr16	57070198	57070333	136	*	17.4	+	Promoter (2-3kb)	16	57068080	57117436	49357	1	84166	uc010ccs.1	2118	ENSG00000140853	NLRC5	NLR family CARD domain containing 5	FALSE	FALSE	FALSE	FALSE	FALSE	FALSE
20200205_TTNGFP_D4_GATA6ChIP_001_peak_11315	chr16	57290904	57291202	299	*	21.9	+	Exon (uc002elg.2/51090, exon 4 of 4)	16	57279038	57287545	8508	1	23568	uc002elf.1	11866	ENSG00000102931	ARL2BP	ADP ribosylation factor like GTPase 2 binding protein	TRUE	FALSE	FALSE	FALSE	TRUE	TRUE
20200205_TTNGFP_D4_GATA6ChIP_001_peak_11316	chr16	57292237	57292469	233	*	17.4	+	Exon (uc002elg.2/51090, exon 3 of 4)	16	57279038	57287545	8508	1	23568	uc002elf.1	13199	ENSG00000102931	ARL2BP	ADP ribosylation factor like GTPase 2 binding protein	FALSE	FALSE	FALSE	FALSE	FALSE	FALSE
20200205_TTNGFP_D4_GATA6ChIP_001_peak_11317	chr16	57302638	57303291	654	*	131.2	+	Intron (uc002elg.2/51090, intron 1 of 3)	16	57290009	57318584	28576	2	51090	uc002elg.2	15293	ENSG00000102934	PLLP	plasmolipin	TRUE	TRUE	TRUE	TRUE	TRUE	TRUE
20200205_TTNGFP_D4_GATA6ChIP_001_peak_11318	chr16	57307441	57307720	280	*	18.9	+	Intron (uc002elg.2/51090, intron 1 of 3)	16	57290009	57318584	28576	2	51090	uc002elg.2	10864	ENSG00000102934	PLLP	plasmolipin	TRUE	TRUE	TRUE	TRUE	TRUE	TRUE
20200205_TTNGFP_D4_GATA6ChIP_001_peak_11319	chr16	57415810	57416127	318	*	23.6	+	Exon (uc002eli.3/6376, exon 3 of 3)	16	57406414	57418956	12543	1	6376	uc002eli.3	9396	ENSG00000006210	CX3CL1	C-X3-C motif chemokine ligand 1	FALSE	TRUE	TRUE	FALSE	FALSE	FALSE
20200205_TTNGFP_D4_GATA6ChIP_001_peak_11320	chr16	57416488	57416699	212	*	13.5	+	Exon (uc002eli.3/6376, exon 3 of 3)	16	57406414	57418956	12543	1	6376	uc002eli.3	10074	ENSG00000006210	CX3CL1	C-X3-C motif chemokine ligand 1	FALSE	TRUE	TRUE	FALSE	FALSE	FALSE
20200205_TTNGFP_D4_GATA6ChIP_001_peak_11321	chr16	57445360	57445487	128	*	7.7	+	Intron (uc002elj.1/6361, intron 1 of 3)	16	57438679	57449974	11296	1	6361	uc010ccz.1	6681	ENSG00000102970	CCL17	C-C motif chemokine ligand 17	FALSE	FALSE	FALSE	FALSE	FALSE	FALSE
20200205_TTNGFP_D4_GATA6ChIP_001_peak_11322	chr16	57450940	57451185	246	*	24.2	+	Distal Intergenic	16	57438679	57449974	11296	1	6361	uc010ccz.1	12261	ENSG00000102970	CCL17	C-C motif chemokine ligand 17	FALSE	FALSE	FALSE	FALSE	TRUE	TRUE
20200205_TTNGFP_D4_GATA6ChIP_001_peak_11323	chr16	57509383	57509561	179	*	11.5	+	Exon (uc010cdb.3/55715, exon 3 of 8)	16	57505870	57513679	7810	2	55715	uc010cdb.3	4118	ENSG00000125170	DOK4	docking protein 4	FALSE	TRUE	TRUE	FALSE	FALSE	FALSE
20200205_TTNGFP_D4_GATA6ChIP_001_peak_11325	chr16	57514198	57514597	400	*	45	+	Promoter (<=1kb)	16	57505870	57513679	7810	2	55715	uc010cdb.3	-519	ENSG00000125170	DOK4	docking protein 4	TRUE	TRUE	TRUE	FALSE	FALSE	TRUE
20200205_TTNGFP_D4_GATA6ChIP_001_peak_11326	chr16	57517992	57518374	383	*	58.6	+	Promoter (2-3kb)	16	57505870	57520385	14516	2	55715	uc002elv.4	2011	ENSG00000125170	DOK4	docking protein 4	TRUE	TRUE	TRUE	FALSE	FALSE	TRUE
20200205_TTNGFP_D4_GATA6ChIP_001_peak_11327	chr16	57533874	57534029	156	*	22.3	+	Distal Intergenic	16	57505870	57520385	14516	2	55715	uc002elv.4	-13489	ENSG00000125170	DOK4	docking protein 4	FALSE	TRUE	TRUE	FALSE	FALSE	FALSE
20200205_TTNGFP_D4_GATA6ChIP_001_peak_11328	chr16	57541376	57541505	130	*	12.1	+	Distal Intergenic	16	57505870	57520385	14516	2	55715	uc002elv.4	-20991	ENSG00000125170	DOK4	docking protein 4	FALSE	TRUE	TRUE	FALSE	FALSE	FALSE
20200205_TTNGFP_D4_GATA6ChIP_001_peak_11329	chr16	57543358	57543530	173	*	16.5	+	Downstream (2-3kb)	16	57505870	57520385	14516	2	55715	uc002elv.4	-22973	ENSG00000125170	DOK4	docking protein 4	FALSE	TRUE	TRUE	FALSE	FALSE	FALSE
20200205_TTNGFP_D4_GATA6ChIP_001_peak_11330	chr16	57543792	57544391	600	*	197.2	+	Downstream (1-2kb)	16	57505870	57520385	14516	2	55715	uc002elv.4	-23407	ENSG00000125170	DOK4	docking protein 4	TRUE	TRUE	TRUE	FALSE	TRUE	TRUE
20200205_TTNGFP_D4_GATA6ChIP_001_peak_11331	chr16	57601710	57601912	203	*	22.1	+	Exon (uc002elx.4/221188, exon 9 of 12)	16	57576601	57611100	34500	1	221188	uc002ely.3	25109	ENSG00000159618	ADGRG5	adhesion G protein-coupled receptor G5	FALSE	FALSE	FALSE	FALSE	FALSE	FALSE
20200205_TTNGFP_D4_GATA6ChIP_001_peak_11332	chr16	57609468	57609605	138	*	14.2	+	3' UTR	16	57576601	57611100	34500	1	221188	uc002ely.3	32867	ENSG00000159618	ADGRG5	adhesion G protein-coupled receptor G5	FALSE	FALSE	FALSE	FALSE	FALSE	FALSE
20200205_TTNGFP_D4_GATA6ChIP_001_peak_11334	chr16	57651531	57652008	478	*	32.4	+	Promoter (1-2kb)	16	57653650	57694788	41139	1	9289	uc002elz.1	-1642	ENSG00000205336	ADGRG1	adhesion G protein-coupled receptor G1	TRUE	FALSE	FALSE	FALSE	FALSE	FALSE
20200205_TTNGFP_D4_GATA6ChIP_001_peak_11335	chr16	57654188	57654374	187	*	20.3	+	Promoter (<=1kb)	16	57653910	57698944	45035	1	9289	uc002emc.2	278	ENSG00000205336	ADGRG1	adhesion G protein-coupled receptor G1	FALSE	FALSE	FALSE	FALSE	FALSE	FALSE
20200205_TTNGFP_D4_GATA6ChIP_001_peak_11336	chr16	57654810	57654926	117	*	19.2	+	Promoter (<=1kb)	16	57653910	57698944	45035	1	9289	uc002emc.2	900	ENSG00000205336	ADGRG1	adhesion G protein-coupled receptor G1	FALSE	FALSE	FALSE	FALSE	FALSE	FALSE
20200205_TTNGFP_D4_GATA6ChIP_001_peak_11337	chr16	57662155	57662373	219	*	23.5	+	Promoter (<=1kb)	16	57662419	57698944	36526	1	9289	uc002emd.2	-46	ENSG00000205336	ADGRG1	adhesion G protein-coupled receptor G1	FALSE	FALSE	FALSE	FALSE	FALSE	FALSE
20200205_TTNGFP_D4_GATA6ChIP_001_peak_11339	chr16	57666570	57666815	246	*	17	+	Intron (uc002elz.1/9289, intron 1 of 11)	16	57662419	57698944	36526	1	9289	uc010vht.1	4151	ENSG00000205336	ADGRG1	adhesion G protein-coupled receptor G1	TRUE	FALSE	FALSE	FALSE	FALSE	FALSE
20200205_TTNGFP_D4_GATA6ChIP_001_peak_1134	chr1	18214553	18214776	224	*	16	+	Distal Intergenic	1	18081808	18153558	71751	1	81569	uc001bat.3	132745	ENSG00000117148	ACTL8	actin like 8	TRUE	FALSE	FALSE	FALSE	FALSE	TRUE
20200205_TTNGFP_D4_GATA6ChIP_001_peak_11340	chr16	57678519	57678681	163	*	21.6	+	Intron (uc002elz.1/9289, intron 2 of 11)	16	57673207	57698944	25738	1	9289	uc010vhu.1	5312	ENSG00000205336	ADGRG1	adhesion G protein-coupled receptor G1	FALSE	FALSE	FALSE	FALSE	FALSE	FALSE
20200205_TTNGFP_D4_GATA6ChIP_001_peak_11341	chr16	57685175	57685304	130	*	18.2	+	5' UTR	16	57673207	57698944	25738	1	9289	uc010vhu.1	11968	ENSG00000205336	ADGRG1	adhesion G protein-coupled receptor G1	FALSE	FALSE	FALSE	FALSE	FALSE	FALSE
20200205_TTNGFP_D4_GATA6ChIP_001_peak_11343	chr16	57700721	57700857	137	*	19.5	+	Promoter (1-2kb)	16	57702157	57712751	10595	1	222487	uc010cdc.3	-1300	ENSG00000182885	ADGRG3	adhesion G protein-coupled receptor G3	FALSE	TRUE	TRUE	FALSE	FALSE	FALSE
20200205_TTNGFP_D4_GATA6ChIP_001_peak_11344	chr16	57701465	57701654	190	*	16.8	+	Promoter (<=1kb)	16	57702157	57712751	10595	1	222487	uc010cdc.3	-503	ENSG00000182885	ADGRG3	adhesion G protein-coupled receptor G3	TRUE	TRUE	TRUE	FALSE	FALSE	FALSE
20200205_TTNGFP_D4_GATA6ChIP_001_peak_11345	chr16	57713287	57713566	280	*	32.2	+	Promoter (<=1kb)	16	57713710	57723290	9581	1	222487	uc010cde.3	-144	ENSG00000182885	ADGRG3	adhesion G protein-coupled receptor G3	FALSE	TRUE	TRUE	FALSE	FALSE	FALSE
20200205_TTNGFP_D4_GATA6ChIP_001_peak_11346	chr16	57718748	57718925	178	*	16.8	+	Intron (uc002emh.3/222487, intron 10 of 11)	16	57713710	57723290	9581	1	222487	uc010cde.3	5038	ENSG00000182885	ADGRG3	adhesion G protein-coupled receptor G3	FALSE	TRUE	TRUE	FALSE	FALSE	FALSE
20200205_TTNGFP_D4_GATA6ChIP_001_peak_11347	chr16	57723498	57724067	570	*	54	+	Promoter (4-5kb)	16	57728713	57765367	36655	1	84229	uc002emi.3	-4646	ENSG00000159625	DRC7	dynein regulatory complex subunit 7	TRUE	FALSE	FALSE	TRUE	TRUE	TRUE
20200205_TTNGFP_D4_GATA6ChIP_001_peak_11349	chr16	57760228	57760423	196	*	12.7	+	Promoter (9-10kb)	16	57769660	57791162	21503	1	10300	uc002eml.1	-9237	ENSG00000140854	KATNB1	katanin regulatory subunit B1	FALSE	FALSE	FALSE	FALSE	FALSE	FALSE
20200205_TTNGFP_D4_GATA6ChIP_001_peak_1135	chr1	18346303	18346465	163	*	11.7	+	Distal Intergenic	1	18434240	18704977	270738	1	84966	uc001bau.2	-87775	ENSG00000117154	IGSF21	immunoglobin superfamily member 21	FALSE	FALSE	FALSE	FALSE	FALSE	FALSE
20200205_TTNGFP_D4_GATA6ChIP_001_peak_11351	chr16	57786095	57786528	434	*	28.6	+	Exon (uc002eml.1/10300, exon 9 of 20)	16	57769660	57791162	21503	1	10300	uc002eml.1	16435	ENSG00000140854	KATNB1	katanin regulatory subunit B1	FALSE	FALSE	FALSE	FALSE	FALSE	FALSE
20200205_TTNGFP_D4_GATA6ChIP_001_peak_11353	chr16	57789759	57789938	180	*	16.7	+	Exon (uc002eml.1/10300, exon 17 of 20)	16	57792129	57809020	16892	2	3801	uc010vhw.2	19082	ENSG00000140859	KIFC3	kinesin family member C3	FALSE	FALSE	FALSE	FALSE	FALSE	FALSE
20200205_TTNGFP_D4_GATA6ChIP_001_peak_11354	chr16	57795369	57795569	201	*	11.7	+	Exon (uc010vhw.2/3801, exon 12 of 18)	16	57792129	57809020	16892	2	3801	uc010vhw.2	13451	ENSG00000140859	KIFC3	kinesin family member C3	FALSE	FALSE	FALSE	FALSE	FALSE	FALSE
20200205_TTNGFP_D4_GATA6ChIP_001_peak_11355	chr16	57798465	57798593	129	*	14.5	+	Intron (uc010vhw.2/3801, intron 9 of 17)	16	57792129	57809020	16892	2	3801	uc010vhw.2	10427	ENSG00000140859	KIFC3	kinesin family member C3	TRUE	FALSE	FALSE	FALSE	FALSE	FALSE
20200205_TTNGFP_D4_GATA6ChIP_001_peak_11356	chr16	57805083	57805358	276	*	18.2	+	Exon (uc010vhw.2/3801, exon 4 of 18)	16	57792129	57809020	16892	2	3801	uc010vhw.2	3662	ENSG00000140859	KIFC3	kinesin family member C3	FALSE	FALSE	FALSE	FALSE	FALSE	FALSE
20200205_TTNGFP_D4_GATA6ChIP_001_peak_11359	chr16	57809734	57809942	209	*	20	+	Promoter (<=1kb)	16	57792129	57809020	16892	2	3801	uc010vhw.2	-714	ENSG00000140859	KIFC3	kinesin family member C3	FALSE	FALSE	FALSE	FALSE	TRUE	TRUE
20200205_TTNGFP_D4_GATA6ChIP_001_peak_1136	chr1	18405510	18405750	241	*	12.3	+	Distal Intergenic	1	18434240	18704977	270738	1	84966	uc001bau.2	-28490	ENSG00000117154	IGSF21	immunoglobin superfamily member 21	FALSE	FALSE	FALSE	FALSE	FALSE	FALSE
20200205_TTNGFP_D4_GATA6ChIP_001_peak_11360	chr16	57818943	57819139	197	*	18.6	+	Promoter (2-3kb)	16	57792129	57816225	24097	2	3801	uc010vhx.2	-2718	ENSG00000140859	KIFC3	kinesin family member C3	FALSE	FALSE	FALSE	FALSE	FALSE	FALSE
20200205_TTNGFP_D4_GATA6ChIP_001_peak_11361	chr16	57820992	57821284	293	*	23.3	+	Promoter (4-5kb)	16	57792129	57816225	24097	2	3801	uc010vhx.2	-4767	ENSG00000140859	KIFC3	kinesin family member C3	FALSE	FALSE	FALSE	FALSE	FALSE	FALSE
20200205_TTNGFP_D4_GATA6ChIP_001_peak_11362	chr16	57821742	57822451	710	*	61	+	Promoter (5-6kb)	16	57792129	57816225	24097	2	3801	uc010vhx.2	-5517	ENSG00000140859	KIFC3	kinesin family member C3	TRUE	FALSE	FALSE	FALSE	TRUE	TRUE
20200205_TTNGFP_D4_GATA6ChIP_001_peak_11365	chr16	57942575	57942741	167	*	12.1	+	Intron (uc002emt.2/1258, intron 25 of 32)	16	57795325	57896733	101409	2	3801	uc002emr.1	-45842	ENSG00000140859	KIFC3	kinesin family member C3	FALSE	FALSE	FALSE	FALSE	FALSE	TRUE
20200205_TTNGFP_D4_GATA6ChIP_001_peak_11366	chr16	57973786	57973910	125	*	18.5	+	Intron (uc002emt.2/1258, intron 15 of 32)	16	57916244	58005020	88777	2	1258	uc002emt.2	31110	ENSG00000070729	CNGB1	cyclic nucleotide gated channel beta 1	FALSE	FALSE	FALSE	FALSE	FALSE	FALSE
20200205_TTNGFP_D4_GATA6ChIP_001_peak_11367	chr16	57990314	57990527	214	*	23.5	+	Intron (uc002emt.2/1258, intron 12 of 32)	16	57916244	58005020	88777	2	1258	uc002emt.2	14493	ENSG00000070729	CNGB1	cyclic nucleotide gated channel beta 1	FALSE	FALSE	FALSE	FALSE	FALSE	FALSE
20200205_TTNGFP_D4_GATA6ChIP_001_peak_11369	chr16	58011549	58011721	173	*	12.6	+	Promoter (1-2kb)	16	58010339	58022017	11679	1	374739	uc002emw.4	1210	ENSG00000159648	TEPP	testis, prostate and placenta expressed	FALSE	FALSE	TRUE	FALSE	FALSE	FALSE
20200205_TTNGFP_D4_GATA6ChIP_001_peak_1137	chr1	18417084	18417474	391	*	59.5	+	Distal Intergenic	1	18434240	18704977	270738	1	84966	uc001bau.2	-16766	ENSG00000117154	IGSF21	immunoglobin superfamily member 21	TRUE	FALSE	FALSE	FALSE	TRUE	TRUE
20200205_TTNGFP_D4_GATA6ChIP_001_peak_11370	chr16	58019888	58020204	317	*	27.4	+	Intron (uc002emv.4/374739, intron 7 of 7)	16	58010339	58022017	11679	1	374739	uc002emw.4	9549	ENSG00000159648	TEPP	testis, prostate and placenta expressed	FALSE	FALSE	TRUE	FALSE	FALSE	FALSE
20200205_TTNGFP_D4_GATA6ChIP_001_peak_11372	chr16	58027203	58027363	161	*	15.3	+	Downstream (1-2kb)	16	58028573	58033762	5190	2	57567	uc002emx.1	6399	ENSG00000166188	ZNF319	zinc finger protein 319	FALSE	FALSE	FALSE	TRUE	FALSE	FALSE
20200205_TTNGFP_D4_GATA6ChIP_001_peak_11373	chr16	58058509	58058867	359	*	47.8	+	Promoter (<=1kb)	16	58059282	58080804	21523	1	4324	uc002ena.3	-415	ENSG00000102996	MMP15	matrix metallopeptidase 15	TRUE	FALSE	FALSE	TRUE	FALSE	FALSE
20200205_TTNGFP_D4_GATA6ChIP_001_peak_11374	chr16	58062736	58063160	425	*	42.5	+	Intron (uc002ena.3/4324, intron 1 of 9)	16	58059282	58080804	21523	1	4324	uc002ena.3	3454	ENSG00000102996	MMP15	matrix metallopeptidase 15	TRUE	FALSE	FALSE	TRUE	FALSE	FALSE
20200205_TTNGFP_D4_GATA6ChIP_001_peak_11375	chr16	58066330	58067441	1112	*	262.5	+	Intron (uc002ena.3/4324, intron 1 of 9)	16	58059282	58080804	21523	1	4324	uc002ena.3	7048	ENSG00000102996	MMP15	matrix metallopeptidase 15	TRUE	FALSE	FALSE	TRUE	TRUE	TRUE
20200205_TTNGFP_D4_GATA6ChIP_001_peak_11376	chr16	58068417	58068572	156	*	11.2	+	Intron (uc002ena.3/4324, intron 1 of 9)	16	58059282	58080804	21523	1	4324	uc002ena.3	9135	ENSG00000102996	MMP15	matrix metallopeptidase 15	FALSE	FALSE	FALSE	TRUE	FALSE	FALSE
20200205_TTNGFP_D4_GATA6ChIP_001_peak_11377	chr16	58069232	58069439	208	*	21.2	+	Intron (uc002ena.3/4324, intron 1 of 9)	16	58059282	58080804	21523	1	4324	uc002ena.3	9950	ENSG00000102996	MMP15	matrix metallopeptidase 15	FALSE	FALSE	FALSE	TRUE	FALSE	FALSE
20200205_TTNGFP_D4_GATA6ChIP_001_peak_11379	chr16	58522422	58522686	265	*	20.9	+	Intron (uc002enk.3/65009, intron 2 of 15)	16	58534047	58547523	13477	1	65009	uc002eno.3	-11361	ENSG00000103034	NDRG4	NDRG family member 4	FALSE	FALSE	FALSE	FALSE	FALSE	TRUE
20200205_TTNGFP_D4_GATA6ChIP_001_peak_1138	chr1	18437395	18437555	161	*	19.4	+	Intron (uc001bau.2/84966, intron 1 of 9)	1	18434240	18704977	270738	1	84966	uc001bau.2	3155	ENSG00000117154	IGSF21	immunoglobin superfamily member 21	FALSE	FALSE	FALSE	FALSE	FALSE	FALSE
20200205_TTNGFP_D4_GATA6ChIP_001_peak_11383	chr16	58537119	58537265	147	*	13.8	+	Promoter (2-3kb)	16	58539895	58547073	7179	1	65009	uc002enq.1	-2630	ENSG00000103034	NDRG4	NDRG family member 4	FALSE	FALSE	FALSE	FALSE	FALSE	FALSE
20200205_TTNGFP_D4_GATA6ChIP_001_peak_11384	chr16	58537519	58537666	148	*	15.3	+	Promoter (2-3kb)	16	58539895	58547073	7179	1	65009	uc002enq.1	-2229	ENSG00000103034	NDRG4	NDRG family member 4	FALSE	FALSE	FALSE	FALSE	FALSE	FALSE
20200205_TTNGFP_D4_GATA6ChIP_001_peak_11386	chr16	58540199	58540324	126	*	14.8	+	Promoter (<=1kb)	16	58539895	58547073	7179	1	65009	uc002enq.1	304	ENSG00000103034	NDRG4	NDRG family member 4	FALSE	FALSE	FALSE	FALSE	FALSE	FALSE
20200205_TTNGFP_D4_GATA6ChIP_001_peak_11387	chr16	58663864	58664162	299	*	21.2	+	Promoter (<=1kb)	16	58583623	58663790	80168	2	23019	uc002enz.2	-74	ENSG00000125107	CNOT1	CCR4-NOT transcription complex subunit 1	FALSE	FALSE	FALSE	FALSE	TRUE	TRUE
20200205_TTNGFP_D4_GATA6ChIP_001_peak_11388	chr16	58705004	58705257	254	*	21.3	+	Exon (uc002eod.1/55238, exon 10 of 12)	16	58700298	58718611	18314	2	55238	uc002eoc.1	13354	ENSG00000103042	SLC38A7	solute carrier family 38 member 7	FALSE	FALSE	FALSE	FALSE	FALSE	FALSE
20200205_TTNGFP_D4_GATA6ChIP_001_peak_11389	chr16	58780777	58780932	156	*	17.3	+	Distal Intergenic	16	58741035	58768246	27212	2	2806	uc010vim.1	-12531	ENSG00000125166	GOT2	glutamic-oxaloacetic transaminase 2	FALSE	FALSE	FALSE	FALSE	FALSE	FALSE
20200205_TTNGFP_D4_GATA6ChIP_001_peak_11390	chr16	58782844	58783152	309	*	16.2	+	Distal Intergenic	16	58741035	58768246	27212	2	2806	uc010vim.1	-14598	ENSG00000125166	GOT2	glutamic-oxaloacetic transaminase 2	FALSE	FALSE	FALSE	FALSE	FALSE	FALSE
20200205_TTNGFP_D4_GATA6ChIP_001_peak_11393	chr16	59763677	59763973	297	*	22.9	+	Distal Intergenic	16	59788045	59789095	1051	2	644649	uc021tji.2	25122	NA	APOOP5	apolipoprotein O pseudogene 5	TRUE	FALSE	FALSE	FALSE	FALSE	FALSE
20200205_TTNGFP_D4_GATA6ChIP_001_peak_11395	chr16	61614471	61614815	345	*	24.8	+	Distal Intergenic	16	61760082	61891142	131061	2	1006	uc002eoh.3	276327	ENSG00000150394	CDH8	cadherin 8	FALSE	FALSE	TRUE	TRUE	FALSE	FALSE
20200205_TTNGFP_D4_GATA6ChIP_001_peak_11397	chr16	63652332	63652725	394	*	27.2	+	Distal Intergenic	16	64980683	65038944	58262	2	1009	uc010cdn.3	1386219	ENSG00000140937	CDH11	cadherin 11	FALSE	FALSE	TRUE	FALSE	FALSE	FALSE
20200205_TTNGFP_D4_GATA6ChIP_001_peak_11398	chr16	64649649	64649811	163	*	13.2	+	Distal Intergenic	16	64980683	65038944	58262	2	1009	uc010cdn.3	389133	ENSG00000140937	CDH11	cadherin 11	FALSE	FALSE	TRUE	FALSE	TRUE	TRUE
20200205_TTNGFP_D4_GATA6ChIP_001_peak_1140	chr1	18470735	18470861	127	*	11	+	Intron (uc001bau.2/84966, intron 1 of 9)	1	18434240	18704977	270738	1	84966	uc001bau.2	36495	ENSG00000117154	IGSF21	immunoglobin superfamily member 21	FALSE	FALSE	FALSE	FALSE	FALSE	FALSE
20200205_TTNGFP_D4_GATA6ChIP_001_peak_11401	chr16	66301236	66301587	352	*	22.9	+	Distal Intergenic	16	66400525	66438689	38165	1	1003	uc002eom.4	-98938	ENSG00000179776	CDH5	cadherin 5	FALSE	FALSE	FALSE	FALSE	FALSE	FALSE
20200205_TTNGFP_D4_GATA6ChIP_001_peak_11403	chr16	66361257	66361385	129	*	11.8	+	Distal Intergenic	16	66400525	66438689	38165	1	1003	uc002eom.4	-39140	ENSG00000179776	CDH5	cadherin 5	FALSE	FALSE	FALSE	FALSE	FALSE	FALSE
20200205_TTNGFP_D4_GATA6ChIP_001_peak_11404	chr16	66406406	66406590	185	*	12.3	+	Intron (uc002eom.4/1003, intron 1 of 11)	16	66400525	66438689	38165	1	1003	uc002eom.4	5881	ENSG00000179776	CDH5	cadherin 5	FALSE	FALSE	FALSE	FALSE	FALSE	FALSE
20200205_TTNGFP_D4_GATA6ChIP_001_peak_11405	chr16	66434552	66434883	332	*	19.8	+	Promoter (7-8kb)	16	66442427	66444803	2377	1	100505865	uc002eoo.2	-7544	NA	LINC00920	long intergenic non-protein coding RNA 920	TRUE	FALSE	FALSE	FALSE	FALSE	FALSE
20200205_TTNGFP_D4_GATA6ChIP_001_peak_11406	chr16	66436616	66436811	196	*	15.4	+	Promoter (5-6kb)	16	66442427	66444803	2377	1	100505865	uc002eoo.2	-5616	NA	LINC00920	long intergenic non-protein coding RNA 920	FALSE	FALSE	FALSE	FALSE	FALSE	FALSE
20200205_TTNGFP_D4_GATA6ChIP_001_peak_11407	chr16	66526825	66527443	619	*	33.9	+	3' UTR	16	66511463	66527432	15970	1	146227	uc021tjq.1	15362	ENSG00000166546	BEAN1	brain expressed associated with NEDD4 1	FALSE	FALSE	FALSE	FALSE	FALSE	FALSE
20200205_TTNGFP_D4_GATA6ChIP_001_peak_11409	chr16	66583484	66583610	127	*	9.1	+	Promoter (<=1kb)	16	66541906	66583728	41823	2	7084	uc010vip.2	118	ENSG00000166548	TK2	thymidine kinase 2	FALSE	FALSE	FALSE	FALSE	FALSE	FALSE
20200205_TTNGFP_D4_GATA6ChIP_001_peak_1141	chr1	18483833	18483976	144	*	20.1	+	Intron (uc001bau.2/84966, intron 1 of 9)	1	18434240	18704977	270738	1	84966	uc001bau.2	49593	ENSG00000117154	IGSF21	immunoglobin superfamily member 21	FALSE	FALSE	FALSE	FALSE	FALSE	FALSE
20200205_TTNGFP_D4_GATA6ChIP_001_peak_11410	chr16	66887298	66887616	319	*	26.8	+	3' UTR	16	66878841	66888049	9209	1	766	uc002eqj.3	8457	ENSG00000168748	CA7	carbonic anhydrase 7	FALSE	FALSE	FALSE	FALSE	FALSE	FALSE
20200205_TTNGFP_D4_GATA6ChIP_001_peak_11411	chr16	66890982	66891109	128	*	13.3	+	Distal Intergenic	16	66878841	66888049	9209	1	766	uc002eqj.3	12141	ENSG00000168748	CA7	carbonic anhydrase 7	FALSE	FALSE	FALSE	FALSE	FALSE	TRUE
20200205_TTNGFP_D4_GATA6ChIP_001_peak_11413	chr16	66938069	66938234	166	*	16.5	+	Distal Intergenic	16	66942025	66952887	10863	2	1014	uc002eql.3	14653	ENSG00000166589	CDH16	cadherin 16	FALSE	FALSE	FALSE	FALSE	FALSE	FALSE
20200205_TTNGFP_D4_GATA6ChIP_001_peak_11414	chr16	66944645	66944772	128	*	15.1	+	Intron (uc002eql.3/1014, intron 14 of 17)	16	66942025	66952887	10863	2	1014	uc002eql.3	8115	ENSG00000166589	CDH16	cadherin 16	FALSE	FALSE	FALSE	FALSE	FALSE	FALSE
20200205_TTNGFP_D4_GATA6ChIP_001_peak_11417	chr16	67007451	67007679	229	*	12	+	3' UTR	16	67001378	67009052	7675	1	23491	uc010viw.2	6073	ENSG00000172828	CES3	carboxylesterase 3	FALSE	TRUE	TRUE	FALSE	FALSE	FALSE
20200205_TTNGFP_D4_GATA6ChIP_001_peak_11418	chr16	67144146	67144294	149	*	16.2	+	Promoter (<=1kb)	16	67143915	67182442	38528	1	80262	uc002erd.3	231	ENSG00000125149	C16orf70	chromosome 16 open reading frame 70	FALSE	FALSE	FALSE	TRUE	FALSE	FALSE
20200205_TTNGFP_D4_GATA6ChIP_001_peak_11419	chr16	67160917	67161056	140	*	10.9	+	Intron (uc002erc.3/80262, intron 4 of 16)	16	67153998	67170211	16214	1	80262	uc002ere.1	6919	ENSG00000125149	C16orf70	chromosome 16 open reading frame 70	FALSE	FALSE	FALSE	TRUE	FALSE	FALSE
20200205_TTNGFP_D4_GATA6ChIP_001_peak_1142	chr1	18494257	18494449	193	*	12.7	+	Intron (uc001bau.2/84966, intron 1 of 9)	1	18434240	18704977	270738	1	84966	uc001bau.2	60017	ENSG00000117154	IGSF21	immunoglobin superfamily member 21	FALSE	FALSE	FALSE	FALSE	FALSE	FALSE
20200205_TTNGFP_D4_GATA6ChIP_001_peak_11420	chr16	67176277	67176410	134	*	10.7	+	Intron (uc002erc.3/80262, intron 11 of 16)	16	67182005	67184902	2898	2	84752	uc002erf.3	8492	ENSG00000237172	B3GNT9	UDP-GlcNAc:betaGal beta-1,3-N-acetylglucosaminyltransferase 9	FALSE	FALSE	FALSE	FALSE	FALSE	FALSE
20200205_TTNGFP_D4_GATA6ChIP_001_peak_11421	chr16	67195564	67195862	299	*	29.5	+	Promoter (1-2kb)	16	67197288	67203848	6561	1	3299	uc002erl.2	-1426	ENSG00000102878	HSF4	heat shock transcription factor 4	FALSE	FALSE	FALSE	FALSE	FALSE	FALSE
20200205_TTNGFP_D4_GATA6ChIP_001_peak_11422	chr16	67196632	67196835	204	*	18.6	+	Promoter (<=1kb)	16	67197288	67203848	6561	1	3299	uc002erl.2	-453	ENSG00000102878	HSF4	heat shock transcription factor 4	TRUE	FALSE	FALSE	FALSE	FALSE	FALSE
20200205_TTNGFP_D4_GATA6ChIP_001_peak_11423	chr16	67204013	67204146	134	*	12.7	+	Promoter (<=1kb)	16	67204400	67209640	5241	1	8996	uc031qwm.1	-254	ENSG00000140939	NOL3	nucleolar protein 3	FALSE	FALSE	FALSE	FALSE	FALSE	FALSE
20200205_TTNGFP_D4_GATA6ChIP_001_peak_11424	chr16	67214098	67214268	171	*	20.3	+	Promoter (<=1kb)	16	67209505	67213455	3951	2	653319	uc002ers.3	-643	ENSG00000196123	KIAA0895L	KIAA0895 like	FALSE	FALSE	FALSE	FALSE	FALSE	FALSE
20200205_TTNGFP_D4_GATA6ChIP_001_peak_11425	chr16	67217526	67217756	231	*	21.6	+	Promoter (<=1kb)	16	67209505	67217943	8439	2	653319	uc002ert.3	187	ENSG00000196123	KIAA0895L	KIAA0895 like	TRUE	FALSE	FALSE	FALSE	TRUE	TRUE
20200205_TTNGFP_D4_GATA6ChIP_001_peak_11426	chr16	67220692	67221174	483	*	43.9	+	Promoter (2-3kb)	16	67209505	67217943	8439	2	653319	uc002eru.3	-2749	ENSG00000196123	KIAA0895L	KIAA0895 like	TRUE	FALSE	FALSE	FALSE	FALSE	TRUE
20200205_TTNGFP_D4_GATA6ChIP_001_peak_11429	chr16	67235998	67236195	198	*	15.6	+	Promoter (<=1kb)	16	67236224	67236298	75	2	442901	uc010vjf.1	103	ENSG00000207948	MIR328	microRNA 328	FALSE	FALSE	FALSE	FALSE	FALSE	FALSE
20200205_TTNGFP_D4_GATA6ChIP_001_peak_1143	chr1	18517061	18517578	518	*	82.2	+	Intron (uc001bau.2/84966, intron 1 of 9)	1	18434240	18704977	270738	1	84966	uc001bau.2	82821	ENSG00000117154	IGSF21	immunoglobin superfamily member 21	TRUE	FALSE	FALSE	FALSE	TRUE	TRUE
20200205_TTNGFP_D4_GATA6ChIP_001_peak_11430	chr16	67243414	67243684	271	*	13.8	+	Promoter (1-2kb)	16	67241042	67244988	3947	2	26231	uc002esd.3	1304	ENSG00000125122	LRRC29	leucine rich repeat containing 29	FALSE	FALSE	FALSE	FALSE	FALSE	FALSE
20200205_TTNGFP_D4_GATA6ChIP_001_peak_11431	chr16	67250302	67250522	221	*	21.9	+	Promoter (5-6kb)	16	67241042	67244988	3947	2	26231	uc002esd.3	-5314	ENSG00000125122	LRRC29	leucine rich repeat containing 29	TRUE	FALSE	FALSE	FALSE	FALSE	FALSE
20200205_TTNGFP_D4_GATA6ChIP_001_peak_11432	chr16	67260797	67261064	268	*	18.9	+	Promoter (<=1kb)	16	67241042	67260901	19860	2	26231	uc002esf.3	0	ENSG00000125122	LRRC29	leucine rich repeat containing 29	FALSE	FALSE	FALSE	FALSE	TRUE	TRUE
20200205_TTNGFP_D4_GATA6ChIP_001_peak_11433	chr16	67298959	67299104	146	*	11.7	+	Exon (uc002esm.3/6553, exon 14 of 16)	16	67311413	67323403	11991	1	25894	uc002eso.4	-12309	ENSG00000196155	PLEKHG4	pleckstrin homology and RhoGEF domain containing G4	FALSE	FALSE	FALSE	TRUE	FALSE	FALSE
20200205_TTNGFP_D4_GATA6ChIP_001_peak_11435	chr16	67318298	67318477	180	*	10.7	+	Exon (uc002eso.4/25894, exon 11 of 21)	16	67313492	67323403	9912	1	25894	uc010ceg.3	4806	ENSG00000196155	PLEKHG4	pleckstrin homology and RhoGEF domain containing G4	FALSE	FALSE	FALSE	TRUE	FALSE	FALSE
20200205_TTNGFP_D4_GATA6ChIP_001_peak_11436	chr16	67325100	67325225	126	*	11.2	+	Exon (uc002est.2/146212, exon 14 of 16)	16	67313492	67323403	9912	1	25894	uc010ceg.3	11608	ENSG00000196155	PLEKHG4	pleckstrin homology and RhoGEF domain containing G4	FALSE	FALSE	FALSE	TRUE	FALSE	FALSE
20200205_TTNGFP_D4_GATA6ChIP_001_peak_11437	chr16	67431267	67431402	136	*	16.2	+	Promoter (3-4kb)	16	67423712	67427421	3710	2	51673	uc002etb.3	-3846	ENSG00000159713	TPPP3	tubulin polymerization promoting protein family member 3	FALSE	FALSE	TRUE	FALSE	FALSE	FALSE
20200205_TTNGFP_D4_GATA6ChIP_001_peak_11438	chr16	67431816	67431943	128	*	15.7	+	Promoter (4-5kb)	16	67423712	67427421	3710	2	51673	uc002etb.3	-4395	ENSG00000159713	TPPP3	tubulin polymerization promoting protein family member 3	FALSE	FALSE	TRUE	FALSE	FALSE	FALSE
20200205_TTNGFP_D4_GATA6ChIP_001_peak_11439	chr16	67434035	67434527	493	*	31	+	Promoter (6-7kb)	16	67423712	67427421	3710	2	51673	uc002etb.3	-6614	ENSG00000159713	TPPP3	tubulin polymerization promoting protein family member 3	TRUE	FALSE	TRUE	FALSE	FALSE	FALSE
20200205_TTNGFP_D4_GATA6ChIP_001_peak_1144	chr1	18526027	18526176	150	*	14.8	+	Intron (uc001bau.2/84966, intron 1 of 9)	1	18434240	18704977	270738	1	84966	uc001bau.2	91787	ENSG00000117154	IGSF21	immunoglobin superfamily member 21	FALSE	FALSE	FALSE	FALSE	TRUE	TRUE
20200205_TTNGFP_D4_GATA6ChIP_001_peak_11440	chr16	67467551	67467682	132	*	18.5	+	Promoter (2-3kb)	16	67465036	67471454	6419	1	3291	uc002etd.3	2515	ENSG00000176387	HSD11B2	hydroxysteroid 11-beta dehydrogenase 2	FALSE	FALSE	FALSE	FALSE	FALSE	FALSE
20200205_TTNGFP_D4_GATA6ChIP_001_peak_11441	chr16	67470420	67470707	288	*	20.3	+	Exon (uc002etd.3/3291, exon 5 of 5)	16	67465036	67471454	6419	1	3291	uc002etd.3	5384	ENSG00000176387	HSD11B2	hydroxysteroid 11-beta dehydrogenase 2	TRUE	FALSE	FALSE	FALSE	FALSE	FALSE
20200205_TTNGFP_D4_GATA6ChIP_001_peak_11444	chr16	67474560	67474914	355	*	21.5	+	Intron (uc010vjn.1/9114, intron 5 of 8)	16	67465036	67471454	6419	1	3291	uc002etd.3	9524	ENSG00000176387	HSD11B2	hydroxysteroid 11-beta dehydrogenase 2	TRUE	FALSE	FALSE	FALSE	FALSE	FALSE
20200205_TTNGFP_D4_GATA6ChIP_001_peak_11445	chr16	67475136	67475484	349	*	29.2	+	Intron (uc010vjn.1/9114, intron 5 of 8)	16	67465036	67471454	6419	1	3291	uc002etd.3	10100	ENSG00000176387	HSD11B2	hydroxysteroid 11-beta dehydrogenase 2	TRUE	FALSE	FALSE	FALSE	FALSE	FALSE
20200205_TTNGFP_D4_GATA6ChIP_001_peak_11446	chr16	67476283	67476458	176	*	23.3	+	Intron (uc010vjn.1/9114, intron 5 of 8)	16	67465036	67471454	6419	1	3291	uc002etd.3	11247	ENSG00000176387	HSD11B2	hydroxysteroid 11-beta dehydrogenase 2	FALSE	FALSE	FALSE	FALSE	FALSE	FALSE
20200205_TTNGFP_D4_GATA6ChIP_001_peak_11447	chr16	67486017	67486222	206	*	18	+	Exon (uc010vjo.1/9114, exon 3 of 9)	16	67471917	67493128	21212	2	9114	uc010vjn.1	6906	ENSG00000159720	ATP6V0D1	ATPase H+ transporting V0 subunit d1	FALSE	FALSE	FALSE	FALSE	FALSE	FALSE
20200205_TTNGFP_D4_GATA6ChIP_001_peak_11448	chr16	67559934	67560268	335	*	28.9	+	Promoter (2-3kb)	16	67562717	67577167	14451	1	79567	uc010cei.2	-2449	ENSG00000039523	RIPOR1	RHO family interacting cell polarization regulator 1	TRUE	FALSE	FALSE	FALSE	FALSE	FALSE
20200205_TTNGFP_D4_GATA6ChIP_001_peak_11449	chr16	67572560	67572836	277	*	18.6	+	Promoter (<=1kb)	16	67572327	67580691	8365	1	79567	uc002etk.3	233	ENSG00000039523	RIPOR1	RHO family interacting cell polarization regulator 1	FALSE	FALSE	FALSE	FALSE	FALSE	TRUE
20200205_TTNGFP_D4_GATA6ChIP_001_peak_1145	chr1	18526352	18526570	219	*	17.1	+	Intron (uc001bau.2/84966, intron 1 of 9)	1	18434240	18704977	270738	1	84966	uc001bau.2	92112	ENSG00000117154	IGSF21	immunoglobin superfamily member 21	FALSE	FALSE	FALSE	FALSE	FALSE	FALSE
20200205_TTNGFP_D4_GATA6ChIP_001_peak_11451	chr16	67578781	67579278	498	*	39.1	+	Exon (uc002eth.3/79567, exon 17 of 22)	16	67572327	67580691	8365	1	79567	uc002etk.3	6454	ENSG00000039523	RIPOR1	RHO family interacting cell polarization regulator 1	TRUE	FALSE	FALSE	FALSE	FALSE	FALSE
20200205_TTNGFP_D4_GATA6ChIP_001_peak_11452	chr16	67579653	67579789	137	*	13.2	+	Exon (uc002eth.3/79567, exon 19 of 22)	16	67572327	67580691	8365	1	79567	uc002etk.3	7326	ENSG00000039523	RIPOR1	RHO family interacting cell polarization regulator 1	FALSE	FALSE	FALSE	FALSE	FALSE	FALSE
20200205_TTNGFP_D4_GATA6ChIP_001_peak_11453	chr16	67596151	67596609	459	*	34.1	+	Promoter (<=1kb)	16	67596310	67673088	76779	1	10664	uc002etl.3	0	ENSG00000102974	CTCF	CCCTC-binding factor	TRUE	FALSE	FALSE	FALSE	TRUE	FALSE
20200205_TTNGFP_D4_GATA6ChIP_001_peak_11455	chr16	67697179	67697528	350	*	24.8	+	Promoter (<=1kb)	16	67696850	67698415	1566	2	84080	uc002etv.1	887	ENSG00000124074	ENKD1	enkurin domain containing 1	FALSE	FALSE	FALSE	FALSE	FALSE	FALSE
20200205_TTNGFP_D4_GATA6ChIP_001_peak_11456	chr16	67703019	67703162	144	*	12.6	+	Promoter (2-3kb)	16	67700717	67702661	1945	1	388284	uc002etz.3	2302	ENSG00000159761	C16orf86	chromosome 16 open reading frame 86	FALSE	FALSE	FALSE	FALSE	FALSE	FALSE
20200205_TTNGFP_D4_GATA6ChIP_001_peak_11457	chr16	67760296	67760412	117	*	14.8	+	Promoter (7-8kb)	16	67714619	67753273	38655	2	81577	uc010cen.2	-7023	ENSG00000141098	GFOD2	glucose-fructose oxidoreductase domain containing 2	FALSE	FALSE	FALSE	FALSE	FALSE	FALSE
20200205_TTNGFP_D4_GATA6ChIP_001_peak_11458	chr16	67763585	67763824	240	*	18.9	+	Exon (uc002eud.3/57610, exon 9 of 14)	16	67714619	67753273	38655	2	81577	uc010cen.2	-10312	ENSG00000141098	GFOD2	glucose-fructose oxidoreductase domain containing 2	FALSE	FALSE	FALSE	FALSE	FALSE	FALSE
20200205_TTNGFP_D4_GATA6ChIP_001_peak_11459	chr16	67768771	67769040	270	*	17.9	+	5' UTR	16	67714619	67753273	38655	2	81577	uc010cen.2	-15498	ENSG00000141098	GFOD2	glucose-fructose oxidoreductase domain containing 2	FALSE	FALSE	FALSE	FALSE	FALSE	FALSE
20200205_TTNGFP_D4_GATA6ChIP_001_peak_1146	chr1	18606332	18606568	237	*	24.1	+	Intron (uc001bau.2/84966, intron 2 of 9)	1	18687861	18704977	17117	1	84966	uc001bav.2	-81293	ENSG00000117154	IGSF21	immunoglobin superfamily member 21	FALSE	FALSE	FALSE	FALSE	FALSE	FALSE
20200205_TTNGFP_D4_GATA6ChIP_001_peak_11461	chr16	67791114	67791379	266	*	27.7	+	Intron (uc002eud.3/57610, intron 3 of 13)	16	67714619	67753273	38655	2	81577	uc010cen.2	-37841	ENSG00000141098	GFOD2	glucose-fructose oxidoreductase domain containing 2	FALSE	FALSE	FALSE	FALSE	FALSE	FALSE
20200205_TTNGFP_D4_GATA6ChIP_001_peak_11462	chr16	67863969	67864169	201	*	13.3	+	5' UTR	16	67862060	67868003	5944	2	80152	uc010vkc.2	3834	ENSG00000102901	CENPT	centromere protein T	FALSE	FALSE	FALSE	TRUE	FALSE	FALSE
20200205_TTNGFP_D4_GATA6ChIP_001_peak_11463	chr16	67875778	67875933	156	*	10.7	+	Promoter (<=1kb)	16	67876213	67878098	1886	1	57215	uc002euo.3	-280	ENSG00000168286	THAP11	THAP domain containing 11	FALSE	FALSE	FALSE	FALSE	TRUE	TRUE
20200205_TTNGFP_D4_GATA6ChIP_001_peak_11465	chr16	67916839	67916956	118	*	12.9	+	Promoter (1-2kb)	16	67918781	67920271	1491	1	123904	uc002euu.3	-1825	ENSG00000188038	NRN1L	neuritin 1 like	FALSE	FALSE	FALSE	FALSE	FALSE	FALSE
20200205_TTNGFP_D4_GATA6ChIP_001_peak_11466	chr16	67919906	67920213	308	*	18.5	+	Promoter (1-2kb)	16	67918781	67920271	1491	1	123904	uc002euu.3	1125	ENSG00000188038	NRN1L	neuritin 1 like	FALSE	FALSE	FALSE	FALSE	FALSE	FALSE
20200205_TTNGFP_D4_GATA6ChIP_001_peak_11467	chr16	67925523	67925680	158	*	9.8	+	Promoter (1-2kb)	16	67927175	67943991	16817	1	5681	uc010cet.2	-1495	ENSG00000159792	PSKH1	protein serine kinase H1	FALSE	FALSE	FALSE	FALSE	FALSE	FALSE
20200205_TTNGFP_D4_GATA6ChIP_001_peak_11468	chr16	67943390	67943548	159	*	20.1	+	Exon (uc010cet.2/5681, exon 2 of 2)	16	67927175	67963581	36407	1	5681	uc002euv.3	16215	ENSG00000159792	PSKH1	protein serine kinase H1	FALSE	FALSE	FALSE	FALSE	FALSE	FALSE
20200205_TTNGFP_D4_GATA6ChIP_001_peak_11469	chr16	67951425	67951557	133	*	11	+	Intron (uc002euv.3/5681, intron 2 of 2)	16	67963473	67965778	2306	2	1506	uc002euw.3	14221	ENSG00000141086	CTRL	chymotrypsin like	FALSE	FALSE	FALSE	FALSE	FALSE	FALSE
20200205_TTNGFP_D4_GATA6ChIP_001_peak_1147	chr1	18635329	18635468	140	*	13	+	Intron (uc001bau.2/84966, intron 3 of 9)	1	18687861	18704977	17117	1	84966	uc001bav.2	-52393	ENSG00000117154	IGSF21	immunoglobin superfamily member 21	FALSE	FALSE	FALSE	FALSE	FALSE	FALSE
20200205_TTNGFP_D4_GATA6ChIP_001_peak_11471	chr16	67970048	67970175	128	*	14.7	+	Promoter (<=1kb)	16	67964629	67970780	6152	2	5699	uc002eux.2	605	ENSG00000205220	PSMB10	proteasome subunit beta 10	FALSE	FALSE	FALSE	FALSE	FALSE	FALSE
20200205_TTNGFP_D4_GATA6ChIP_001_peak_11472	chr16	67977979	67978193	215	*	23	+	Promoter (<=1kb)	16	67973787	67978015	4229	2	3931	uc002euy.1	0	ENSG00000213398	LCAT	lecithin-cholesterol acyltransferase	TRUE	FALSE	FALSE	TRUE	FALSE	FALSE
20200205_TTNGFP_D4_GATA6ChIP_001_peak_11476	chr16	67982163	67982681	519	*	35	+	Promoter (<=1kb)	16	67979667	67981338	1672	2	6560	uc010cev.1	-825	ENSG00000124067	SLC12A4	solute carrier family 12 member 4	TRUE	FALSE	FALSE	FALSE	FALSE	FALSE
20200205_TTNGFP_D4_GATA6ChIP_001_peak_11478	chr16	67984153	67984270	118	*	15.1	+	Promoter (2-3kb)	16	67979667	67981338	1672	2	6560	uc010cev.1	-2815	ENSG00000124067	SLC12A4	solute carrier family 12 member 4	FALSE	FALSE	FALSE	FALSE	FALSE	FALSE
20200205_TTNGFP_D4_GATA6ChIP_001_peak_11479	chr16	67984762	67984914	153	*	21.3	+	Promoter (3-4kb)	16	67979667	67981338	1672	2	6560	uc010cev.1	-3424	ENSG00000124067	SLC12A4	solute carrier family 12 member 4	FALSE	FALSE	FALSE	FALSE	FALSE	FALSE
20200205_TTNGFP_D4_GATA6ChIP_001_peak_1148	chr1	18704188	18704490	303	*	23.9	+	Intron (uc001bau.2/84966, intron 9 of 9)	1	18687861	18704977	17117	1	84966	uc001bav.2	16327	ENSG00000117154	IGSF21	immunoglobin superfamily member 21	FALSE	FALSE	FALSE	FALSE	FALSE	FALSE
20200205_TTNGFP_D4_GATA6ChIP_001_peak_11481	chr16	67995835	67995964	130	*	8	+	Promoter (2-3kb)	16	67977377	67997968	20592	2	6560	uc010ceu.2	2004	ENSG00000124067	SLC12A4	solute carrier family 12 member 4	FALSE	FALSE	FALSE	FALSE	FALSE	FALSE
20200205_TTNGFP_D4_GATA6ChIP_001_peak_11482	chr16	67996186	67996355	170	*	13.3	+	Promoter (1-2kb)	16	67977377	67997968	20592	2	6560	uc010ceu.2	1613	ENSG00000124067	SLC12A4	solute carrier family 12 member 4	FALSE	FALSE	FALSE	FALSE	FALSE	FALSE
20200205_TTNGFP_D4_GATA6ChIP_001_peak_11484	chr16	68013988	68014239	252	*	24.2	+	Promoter (<=1kb)	16	68009566	68014452	4887	2	64180	uc002evc.4	213	ENSG00000141096	DPEP3	dipeptidase 3	FALSE	FALSE	FALSE	TRUE	FALSE	FALSE
20200205_TTNGFP_D4_GATA6ChIP_001_peak_11485	chr16	68028131	68028341	211	*	20.7	+	Promoter (<=1kb)	16	68021293	68027279	5987	2	64174	uc010cey.3	-852	ENSG00000167261	DPEP2	dipeptidase 2	TRUE	FALSE	FALSE	FALSE	TRUE	FALSE
20200205_TTNGFP_D4_GATA6ChIP_001_peak_11489	chr16	68271240	68272021	782	*	105.5	+	Promoter (1-2kb)	16	68262450	68270136	7687	2	80004	uc010cfa.1	-1104	ENSG00000103067	ESRP2	epithelial splicing regulatory protein 2	TRUE	FALSE	FALSE	TRUE	TRUE	TRUE
20200205_TTNGFP_D4_GATA6ChIP_001_peak_1149	chr1	18807981	18808153	173	*	14.2	+	Promoter (<=1kb)	1	18807424	18812480	5057	1	127707	uc001bax.3	557	ENSG00000179023	KLHDC7A	kelch domain containing 7A	FALSE	FALSE	FALSE	TRUE	FALSE	FALSE
20200205_TTNGFP_D4_GATA6ChIP_001_peak_11490	chr16	68291806	68291956	151	*	16.3	+	Intron (uc002evr.3/23659, intron 5 of 5)	16	68288684	68294961	6278	1	23659	uc002evs.3	3122	ENSG00000103066	PLA2G15	phospholipase A2 group XV	FALSE	FALSE	FALSE	FALSE	FALSE	FALSE
20200205_TTNGFP_D4_GATA6ChIP_001_peak_11491	chr16	68293693	68293966	274	*	23.9	+	Promoter (4-5kb)	16	68298419	68325564	27146	1	9057	uc010cfb.2	-4453	ENSG00000103064	SLC7A6	solute carrier family 7 member 6	FALSE	FALSE	FALSE	FALSE	FALSE	FALSE
20200205_TTNGFP_D4_GATA6ChIP_001_peak_11492	chr16	68389836	68389997	162	*	19.7	+	Intron (uc002evy.2/54496, intron 17 of 18)	16	68385983	68390700	4718	1	54496	uc010cfd.1	3853	ENSG00000132600	PRMT7	protein arginine methyltransferase 7	FALSE	FALSE	FALSE	FALSE	FALSE	FALSE
20200205_TTNGFP_D4_GATA6ChIP_001_peak_11494	chr16	68391691	68392126	436	*	30.9	+	Downstream (<1kb)	16	68385983	68390700	4718	1	54496	uc010cfd.1	5708	ENSG00000132600	PRMT7	protein arginine methyltransferase 7	FALSE	FALSE	FALSE	FALSE	FALSE	FALSE
20200205_TTNGFP_D4_GATA6ChIP_001_peak_11495	chr16	68394551	68394745	195	*	23.8	+	3' UTR	16	68385983	68390700	4718	1	54496	uc010cfd.1	8568	ENSG00000132600	PRMT7	protein arginine methyltransferase 7	FALSE	FALSE	FALSE	FALSE	FALSE	FALSE
20200205_TTNGFP_D4_GATA6ChIP_001_peak_11497	chr16	68405389	68405556	168	*	14.2	+	Promoter (<=1kb)	16	68392230	68406290	14061	2	55512	uc010cfe.3	734	ENSG00000103056	SMPD3	sphingomyelin phosphodiesterase 3	FALSE	FALSE	FALSE	FALSE	FALSE	FALSE
20200205_TTNGFP_D4_GATA6ChIP_001_peak_11498	chr16	68408697	68409023	327	*	24.5	+	Promoter (2-3kb)	16	68392230	68406290	14061	2	55512	uc010vlh.2	-2407	ENSG00000103056	SMPD3	sphingomyelin phosphodiesterase 3	FALSE	FALSE	FALSE	FALSE	FALSE	FALSE
20200205_TTNGFP_D4_GATA6ChIP_001_peak_11499	chr16	68409752	68409872	121	*	9.5	+	Promoter (3-4kb)	16	68392230	68406290	14061	2	55512	uc010vlh.2	-3462	ENSG00000103056	SMPD3	sphingomyelin phosphodiesterase 3	FALSE	FALSE	FALSE	FALSE	FALSE	FALSE
20200205_TTNGFP_D4_GATA6ChIP_001_peak_1150	chr1	18933715	18933999	285	*	17.1	+	Distal Intergenic	1	18957500	19062632	105133	1	5081	uc001bay.3	-23501	ENSG00000009709	PAX7	paired box 7	FALSE	FALSE	FALSE	FALSE	FALSE	FALSE
20200205_TTNGFP_D4_GATA6ChIP_001_peak_11500	chr16	68410777	68411003	227	*	22.1	+	Promoter (4-5kb)	16	68392230	68406290	14061	2	55512	uc010vlh.2	-4487	ENSG00000103056	SMPD3	sphingomyelin phosphodiesterase 3	FALSE	FALSE	FALSE	FALSE	FALSE	FALSE
20200205_TTNGFP_D4_GATA6ChIP_001_peak_11502	chr16	68431689	68431841	153	*	10.9	+	Intron (uc002ewa.3/55512, intron 1 of 8)	16	68392230	68406290	14061	2	55512	uc010vlh.2	-25399	ENSG00000103056	SMPD3	sphingomyelin phosphodiesterase 3	FALSE	FALSE	FALSE	FALSE	FALSE	FALSE
20200205_TTNGFP_D4_GATA6ChIP_001_peak_11503	chr16	68438207	68438342	136	*	7.9	+	Intron (uc002ewa.3/55512, intron 1 of 8)	16	68392230	68406290	14061	2	55512	uc010vlh.2	-31917	ENSG00000103056	SMPD3	sphingomyelin phosphodiesterase 3	TRUE	FALSE	FALSE	FALSE	FALSE	FALSE
20200205_TTNGFP_D4_GATA6ChIP_001_peak_11504	chr16	68443743	68444126	384	*	39.5	+	Intron (uc002ewa.3/55512, intron 1 of 8)	16	68392230	68406290	14061	2	55512	uc010vlh.2	-37453	ENSG00000103056	SMPD3	sphingomyelin phosphodiesterase 3	TRUE	FALSE	FALSE	FALSE	FALSE	FALSE
20200205_TTNGFP_D4_GATA6ChIP_001_peak_11505	chr16	68446012	68446243	232	*	18.8	+	Intron (uc002ewa.3/55512, intron 1 of 8)	16	68392230	68482409	90180	2	55512	uc002ewa.3	36166	ENSG00000103056	SMPD3	sphingomyelin phosphodiesterase 3	FALSE	FALSE	FALSE	FALSE	FALSE	FALSE
20200205_TTNGFP_D4_GATA6ChIP_001_peak_11506	chr16	68457952	68458082	131	*	9.2	+	Intron (uc002ewa.3/55512, intron 1 of 8)	16	68392230	68482409	90180	2	55512	uc002ewa.3	24327	ENSG00000103056	SMPD3	sphingomyelin phosphodiesterase 3	FALSE	FALSE	FALSE	FALSE	FALSE	FALSE
20200205_TTNGFP_D4_GATA6ChIP_001_peak_11507	chr16	68481234	68481365	132	*	12.4	+	Promoter (1-2kb)	16	68392230	68482409	90180	2	55512	uc002ewa.3	1044	ENSG00000103056	SMPD3	sphingomyelin phosphodiesterase 3	FALSE	FALSE	FALSE	FALSE	FALSE	FALSE
20200205_TTNGFP_D4_GATA6ChIP_001_peak_11508	chr16	68518926	68519069	144	*	17.1	+	Distal Intergenic	16	68392230	68482409	90180	2	55512	uc002ewa.3	-36517	ENSG00000103056	SMPD3	sphingomyelin phosphodiesterase 3	FALSE	FALSE	FALSE	FALSE	FALSE	FALSE
20200205_TTNGFP_D4_GATA6ChIP_001_peak_11509	chr16	68526465	68526825	361	*	23.6	+	Distal Intergenic	16	68564048	68601039	36992	1	146198	uc002ewb.3	-37223	ENSG00000184939	ZFP90	ZFP90 zinc finger protein	TRUE	FALSE	FALSE	FALSE	FALSE	FALSE
20200205_TTNGFP_D4_GATA6ChIP_001_peak_1151	chr1	18967437	18968034	598	*	65.7	+	Intron (uc001bay.3/5081, intron 4 of 7)	1	18957500	19075360	117861	1	5081	uc010oct.2	9937	ENSG00000009709	PAX7	paired box 7	TRUE	FALSE	FALSE	FALSE	TRUE	TRUE
20200205_TTNGFP_D4_GATA6ChIP_001_peak_11510	chr16	68531104	68531223	120	*	8	+	Distal Intergenic	16	68564048	68601039	36992	1	146198	uc002ewb.3	-32825	ENSG00000184939	ZFP90	ZFP90 zinc finger protein	FALSE	FALSE	FALSE	FALSE	FALSE	FALSE
20200205_TTNGFP_D4_GATA6ChIP_001_peak_11511	chr16	68616140	68616269	130	*	13.5	+	Distal Intergenic	16	68573661	68601039	27379	1	146198	uc002ewe.3	42479	ENSG00000184939	ZFP90	ZFP90 zinc finger protein	FALSE	FALSE	FALSE	FALSE	FALSE	FALSE
20200205_TTNGFP_D4_GATA6ChIP_001_peak_11513	chr16	68676596	68676808	213	*	11.5	+	Promoter (1-2kb)	16	68678151	68732957	54807	1	1001	uc002ewf.2	-1343	ENSG00000062038	CDH3	cadherin 3	FALSE	FALSE	FALSE	FALSE	TRUE	TRUE
20200205_TTNGFP_D4_GATA6ChIP_001_peak_11514	chr16	68804703	68805052	350	*	21.5	+	Intron (uc002ewg.1/999, intron 2 of 15)	16	68771195	68869444	98250	1	999	uc010vlj.1	33508	ENSG00000039068	CDH1	cadherin 1	TRUE	FALSE	FALSE	FALSE	FALSE	TRUE
20200205_TTNGFP_D4_GATA6ChIP_001_peak_11515	chr16	69117116	69117324	209	*	10.4	+	Intron (uc002ewi.4/79613, intron 17 of 17)	16	69139467	69151570	12104	1	3038	uc010cfh.3	-22143	ENSG00000103044	HAS3	hyaluronan synthase 3	TRUE	FALSE	TRUE	FALSE	FALSE	FALSE
20200205_TTNGFP_D4_GATA6ChIP_001_peak_11516	chr16	69133256	69133389	134	*	12.9	+	Promoter (6-7kb)	16	69139467	69151570	12104	1	3038	uc010cfh.3	-6078	ENSG00000103044	HAS3	hyaluronan synthase 3	FALSE	FALSE	TRUE	FALSE	FALSE	FALSE
20200205_TTNGFP_D4_GATA6ChIP_001_peak_11517	chr16	69143713	69143870	158	*	21	+	Promoter (2-3kb)	16	69141443	69151570	10128	1	3038	uc002ewl.3	2270	ENSG00000103044	HAS3	hyaluronan synthase 3	FALSE	FALSE	TRUE	FALSE	FALSE	FALSE
20200205_TTNGFP_D4_GATA6ChIP_001_peak_11518	chr16	69148293	69148508	216	*	16	+	Exon (uc010cfh.3/3038, exon 4 of 4)	16	69141443	69151570	10128	1	3038	uc002ewl.3	6850	ENSG00000103044	HAS3	hyaluronan synthase 3	FALSE	FALSE	TRUE	FALSE	FALSE	FALSE
20200205_TTNGFP_D4_GATA6ChIP_001_peak_11519	chr16	69325809	69325962	154	*	11.4	+	Intron (uc002ewu.3/6645, intron 5 of 6)	16	69345287	69358946	13660	1	27183	uc002eww.3	-19325	ENSG00000132612	VPS4A	vacuolar protein sorting 4 homolog A	FALSE	FALSE	FALSE	FALSE	FALSE	FALSE
20200205_TTNGFP_D4_GATA6ChIP_001_peak_1152	chr1	18970106	18970489	384	*	29.2	+	Intron (uc001bay.3/5081, intron 4 of 7)	1	18957500	19075360	117861	1	5081	uc010oct.2	12606	ENSG00000009709	PAX7	paired box 7	TRUE	FALSE	FALSE	FALSE	FALSE	FALSE
20200205_TTNGFP_D4_GATA6ChIP_001_peak_11521	chr16	69391856	69391975	120	*	15.3	+	Promoter (6-7kb)	16	69377149	69385712	8564	2	146456	uc002exc.2	-6144	ENSG00000157315	TMED6	transmembrane p24 trafficking protein 6	FALSE	FALSE	FALSE	FALSE	FALSE	FALSE
20200205_TTNGFP_D4_GATA6ChIP_001_peak_11522	chr16	69786713	69786942	230	*	13.5	+	Promoter (1-2kb)	16	69775757	69788871	13115	2	28987	uc002exs.4	1929	ENSG00000141101	NOB1	NIN1 (RPN12) binding protein 1 homolog	FALSE	FALSE	FALSE	FALSE	FALSE	FALSE
20200205_TTNGFP_D4_GATA6ChIP_001_peak_11523	chr16	69788607	69788778	172	*	15.6	+	Promoter (<=1kb)	16	69775757	69788871	13115	2	28987	uc002exs.4	93	ENSG00000141101	NOB1	NIN1 (RPN12) binding protein 1 homolog	FALSE	FALSE	FALSE	FALSE	FALSE	TRUE
20200205_TTNGFP_D4_GATA6ChIP_001_peak_11524	chr16	69882051	69882187	137	*	9.1	+	Intron (uc031qwu.1/11060, intron 6 of 8)	16	69872640	69975644	103005	1	11060	uc010vlm.2	9411	ENSG00000198373	WWP2	WW domain containing E3 ubiquitin protein ligase 2	FALSE	FALSE	FALSE	FALSE	FALSE	FALSE
20200205_TTNGFP_D4_GATA6ChIP_001_peak_11526	chr16	69958907	69959033	127	*	8.5	+	Promoter (<=1kb)	16	69958886	69975644	16759	1	11060	uc002exw.2	21	ENSG00000198373	WWP2	WW domain containing E3 ubiquitin protein ligase 2	FALSE	FALSE	FALSE	FALSE	FALSE	FALSE
20200205_TTNGFP_D4_GATA6ChIP_001_peak_11527	chr16	69963298	69963562	265	*	19.5	+	Promoter (3-4kb)	16	69966984	69967083	100	1	406932	uc002exx.1	-3422	ENSG00000208017	MIR140	microRNA 140	FALSE	FALSE	FALSE	FALSE	FALSE	FALSE
20200205_TTNGFP_D4_GATA6ChIP_001_peak_1153	chr1	18976758	18976978	221	*	24.5	+	Intron (uc001bay.3/5081, intron 4 of 7)	1	18957500	19075360	117861	1	5081	uc010oct.2	19258	ENSG00000009709	PAX7	paired box 7	FALSE	FALSE	FALSE	FALSE	TRUE	FALSE
20200205_TTNGFP_D4_GATA6ChIP_001_peak_11530	chr16	69973273	69973437	165	*	15.3	+	Exon (uc002exu.2/11060, exon 24 of 25)	16	69966984	69967083	100	1	406932	uc002exx.1	6289	ENSG00000208017	MIR140	microRNA 140	FALSE	FALSE	FALSE	FALSE	FALSE	FALSE
20200205_TTNGFP_D4_GATA6ChIP_001_peak_11532	chr16	70154043	70154231	189	*	21.2	+	Intron (uc002exy.4/283971, intron 4 of 12)	16	70147529	70195184	47656	1	55066	uc010vlr.1	6514	ENSG00000090857	PDPR	pyruvate dehydrogenase phosphatase regulatory subunit	FALSE	FALSE	FALSE	FALSE	FALSE	FALSE
20200205_TTNGFP_D4_GATA6ChIP_001_peak_11533	chr16	70191206	70191400	195	*	14.4	+	3' UTR	16	70179658	70195184	15527	1	55066	uc010vls.1	11548	ENSG00000090857	PDPR	pyruvate dehydrogenase phosphatase regulatory subunit	TRUE	FALSE	FALSE	FALSE	FALSE	FALSE
20200205_TTNGFP_D4_GATA6ChIP_001_peak_11534	chr16	70322128	70322277	150	*	12.9	+	Promoter (1-2kb)	16	70286297	70323412	37116	2	16	uc002eyn.1	1135	ENSG00000090861	AARS	alanyl-tRNA synthetase	FALSE	FALSE	FALSE	FALSE	FALSE	FALSE
20200205_TTNGFP_D4_GATA6ChIP_001_peak_11535	chr16	70328523	70328778	256	*	18.9	+	Promoter (<=1kb)	16	70328700	70367735	39036	1	11269	uc010vlv.3	0	ENSG00000157349	DDX19B	DEAD-box helicase 19B	FALSE	FALSE	FALSE	FALSE	FALSE	FALSE
20200205_TTNGFP_D4_GATA6ChIP_001_peak_11536	chr16	70344770	70344915	146	*	11.2	+	Intron (uc031qwx.1/11269, intron 1 of 9)	16	70333062	70407281	74220	1	55308	uc002eys.4	11708	ENSG00000168872	DDX19A	DEAD-box helicase 19A	FALSE	FALSE	FALSE	FALSE	FALSE	FALSE
20200205_TTNGFP_D4_GATA6ChIP_001_peak_11538	chr16	70461894	70462603	710	*	104.9	+	Intron (uc002eyx.2/6483, intron 1 of 6)	16	70413338	70472991	59654	2	6483	uc002eyx.2	10388	ENSG00000157350	ST3GAL2	ST3 beta-galactoside alpha-2,3-sialyltransferase 2	TRUE	FALSE	FALSE	FALSE	TRUE	TRUE
20200205_TTNGFP_D4_GATA6ChIP_001_peak_11539	chr16	70501701	70501876	176	*	15	+	Exon (uc002eyy.3/197258, exon 8 of 24)	16	70488498	70514177	25680	1	197258	uc010cft.3	13203	ENSG00000157353	FCSK	fucose kinase	FALSE	FALSE	FALSE	FALSE	FALSE	FALSE
20200205_TTNGFP_D4_GATA6ChIP_001_peak_1154	chr1	19005797	19005974	178	*	8.2	+	Intron (uc001bay.3/5081, intron 4 of 7)	1	18957500	19075360	117861	1	5081	uc010oct.2	48297	ENSG00000009709	PAX7	paired box 7	FALSE	FALSE	FALSE	FALSE	FALSE	FALSE
20200205_TTNGFP_D4_GATA6ChIP_001_peak_11540	chr16	70620912	70621360	449	*	21.9	+	Intron (uc002ezh.2/146433, intron 1 of 6)	16	70613798	70694585	80788	1	146433	uc002ezi.2	7114	ENSG00000157368	IL34	interleukin 34	FALSE	FALSE	TRUE	FALSE	FALSE	FALSE
20200205_TTNGFP_D4_GATA6ChIP_001_peak_11541	chr16	70680701	70680891	191	*	17.6	+	5' UTR	16	70657895	70694585	36691	1	146433	uc021tkk.1	22806	ENSG00000157368	IL34	interleukin 34	FALSE	FALSE	TRUE	FALSE	FALSE	FALSE
20200205_TTNGFP_D4_GATA6ChIP_001_peak_11543	chr16	70688625	70688771	147	*	17.9	+	Intron (uc002ezh.2/146433, intron 3 of 6)	16	70710784	70713958	3175	2	92154	uc002ezk.1	25187	ENSG00000132613	MTSS2	MTSS I-BAR domain containing 2	FALSE	FALSE	FALSE	FALSE	FALSE	FALSE
20200205_TTNGFP_D4_GATA6ChIP_001_peak_11544	chr16	70694313	70694520	208	*	21	+	3' UTR	16	70710784	70713958	3175	2	92154	uc002ezk.1	19438	ENSG00000132613	MTSS2	MTSS I-BAR domain containing 2	FALSE	FALSE	FALSE	FALSE	FALSE	FALSE
20200205_TTNGFP_D4_GATA6ChIP_001_peak_11545	chr16	70698185	70698367	183	*	15.4	+	Exon (uc002ezj.3/92154, exon 15 of 15)	16	70710784	70713958	3175	2	92154	uc002ezk.1	15591	ENSG00000132613	MTSS2	MTSS I-BAR domain containing 2	FALSE	FALSE	FALSE	FALSE	FALSE	FALSE
20200205_TTNGFP_D4_GATA6ChIP_001_peak_11546	chr16	70699644	70699792	149	*	14.5	+	Intron (uc002ezj.3/92154, intron 11 of 14)	16	70710784	70713958	3175	2	92154	uc002ezk.1	14166	ENSG00000132613	MTSS2	MTSS I-BAR domain containing 2	FALSE	FALSE	FALSE	FALSE	FALSE	FALSE
20200205_TTNGFP_D4_GATA6ChIP_001_peak_11547	chr16	70712183	70712336	154	*	15.3	+	Promoter (1-2kb)	16	70710784	70713958	3175	2	92154	uc002ezk.1	1622	ENSG00000132613	MTSS2	MTSS I-BAR domain containing 2	FALSE	FALSE	FALSE	FALSE	FALSE	FALSE
20200205_TTNGFP_D4_GATA6ChIP_001_peak_11548	chr16	70723571	70723713	143	*	16.5	+	Promoter (3-4kb)	16	70695107	70719954	24848	2	92154	uc002ezj.3	-3617	ENSG00000132613	MTSS2	MTSS I-BAR domain containing 2	FALSE	FALSE	FALSE	FALSE	FALSE	FALSE
20200205_TTNGFP_D4_GATA6ChIP_001_peak_11550	chr16	70729570	70729899	330	*	28	+	Promoter (9-10kb)	16	70695107	70719954	24848	2	92154	uc002ezj.3	-9616	ENSG00000132613	MTSS2	MTSS I-BAR domain containing 2	TRUE	FALSE	FALSE	FALSE	FALSE	TRUE
20200205_TTNGFP_D4_GATA6ChIP_001_peak_11551	chr16	70749054	70749223	170	*	14.2	+	Intron (uc002ezl.3/55697, intron 1 of 5)	16	70721342	70765462	44121	2	55697	uc002ezl.3	16239	ENSG00000103043	VAC14	VAC14 component of PIKFYVE complex	FALSE	FALSE	FALSE	FALSE	FALSE	TRUE
20200205_TTNGFP_D4_GATA6ChIP_001_peak_11552	chr16	70750304	70750471	168	*	12.6	+	Intron (uc002ezl.3/55697, intron 1 of 5)	16	70721342	70765462	44121	2	55697	uc002ezl.3	14991	ENSG00000103043	VAC14	VAC14 component of PIKFYVE complex	FALSE	FALSE	FALSE	FALSE	FALSE	FALSE
20200205_TTNGFP_D4_GATA6ChIP_001_peak_11554	chr16	70772755	70772956	202	*	17.6	+	Intron (uc002ezm.3/55697, intron 13 of 18)	16	70730793	70778541	47749	2	55697	uc010cfx.1	5585	ENSG00000103043	VAC14	VAC14 component of PIKFYVE complex	TRUE	FALSE	FALSE	FALSE	FALSE	FALSE
20200205_TTNGFP_D4_GATA6ChIP_001_peak_11558	chr16	70824846	70825113	268	*	35.3	+	Intron (uc002ezm.3/55697, intron 1 of 18)	16	70721342	70835061	113720	2	55697	uc002ezm.3	9948	ENSG00000103043	VAC14	VAC14 component of PIKFYVE complex	TRUE	FALSE	FALSE	FALSE	TRUE	TRUE
20200205_TTNGFP_D4_GATA6ChIP_001_peak_11559	chr16	71379335	71379509	175	*	17.1	+	Distal Intergenic	16	71392616	71424342	31727	1	794	uc002faa.4	-13107	ENSG00000172137	CALB2	calbindin 2	FALSE	TRUE	TRUE	TRUE	FALSE	FALSE
20200205_TTNGFP_D4_GATA6ChIP_001_peak_1156	chr1	19020137	19020397	261	*	17.9	+	Intron (uc001bay.3/5081, intron 5 of 7)	1	18957500	19075360	117861	1	5081	uc010oct.2	62637	ENSG00000009709	PAX7	paired box 7	FALSE	FALSE	FALSE	FALSE	TRUE	TRUE
20200205_TTNGFP_D4_GATA6ChIP_001_peak_11560	chr16	71401261	71401507	247	*	23.9	+	Intron (uc002faa.4/794, intron 1 of 10)	16	71392616	71424342	31727	1	794	uc010vme.2	8645	ENSG00000172137	CALB2	calbindin 2	TRUE	TRUE	TRUE	TRUE	TRUE	TRUE
20200205_TTNGFP_D4_GATA6ChIP_001_peak_11561	chr16	71444321	71444473	153	*	10.4	+	Distal Intergenic	16	71481506	71487876	6371	2	7571	uc002fad.3	43403	ENSG00000167377	ZNF23	zinc finger protein 23	FALSE	FALSE	FALSE	FALSE	FALSE	FALSE
20200205_TTNGFP_D4_GATA6ChIP_001_peak_11562	chr16	71613665	71613822	158	*	7.7	+	Promoter (2-3kb)	16	71609327	71610998	1672	2	6898	uc002far.3	-2667	ENSG00000198650	TAT	tyrosine aminotransferase	FALSE	FALSE	TRUE	FALSE	FALSE	FALSE
20200205_TTNGFP_D4_GATA6ChIP_001_peak_11565	chr16	71758071	71758194	124	*	9.7	+	Promoter (<=1kb)	16	71711377	71757715	46339	2	23035	uc002fay.1	-356	ENSG00000040199	PHLPP2	PH domain and leucine rich repeat protein phosphatase 2	FALSE	FALSE	FALSE	FALSE	FALSE	FALSE
20200205_TTNGFP_D4_GATA6ChIP_001_peak_11567	chr16	71894159	71894275	117	*	12.6	+	3' UTR	16	71879894	71891236	11343	1	342371	uc002fbd.3	14265	ENSG00000224470	ATXN1L	ataxin 1 like	FALSE	FALSE	FALSE	FALSE	FALSE	FALSE
20200205_TTNGFP_D4_GATA6ChIP_001_peak_11568	chr16	72047705	72048022	318	*	34.1	+	Intron (uc002fbp.3/1723, intron 2 of 8)	16	72042643	72059316	16674	1	1723	uc002fbp.3	5062	ENSG00000102967	DHODH	dihydroorotate dehydrogenase (quinone)	FALSE	FALSE	FALSE	FALSE	TRUE	TRUE
20200205_TTNGFP_D4_GATA6ChIP_001_peak_11569	chr16	72138352	72138485	134	*	17	+	Exon (uc002fcb.3/9785, exon 15 of 27)	16	72130721	72134496	3776	1	9785	uc010cgn.1	7631	ENSG00000140829	DHX38	DEAH-box helicase 38	FALSE	FALSE	FALSE	FALSE	FALSE	FALSE
20200205_TTNGFP_D4_GATA6ChIP_001_peak_1157	chr1	19043632	19043816	185	*	17.7	+	Intron (uc001bay.3/5081, intron 7 of 7)	1	18957500	19075360	117861	1	5081	uc010oct.2	86132	ENSG00000009709	PAX7	paired box 7	TRUE	FALSE	FALSE	FALSE	FALSE	TRUE
20200205_TTNGFP_D4_GATA6ChIP_001_peak_11570	chr16	72139008	72139199	192	*	19.2	+	Exon (uc002fcb.3/9785, exon 16 of 27)	16	72130721	72134496	3776	1	9785	uc010cgn.1	8287	ENSG00000140829	DHX38	DEAH-box helicase 38	FALSE	FALSE	FALSE	FALSE	FALSE	FALSE
20200205_TTNGFP_D4_GATA6ChIP_001_peak_11572	chr16	72459814	72459964	151	*	8.3	+	Exon (uc002fch.1/uc002fch.1, exon 1 of 1)	16	72152996	72206349	53354	2	83449	uc002fcf.3	-253465	ENSG00000118557	PMFBP1	polyamine modulated factor 1 binding protein 1	FALSE	FALSE	FALSE	FALSE	FALSE	FALSE
20200205_TTNGFP_D4_GATA6ChIP_001_peak_11574	chr16	73061882	73062091	210	*	21.2	+	Intron (uc002fck.3/463, intron 1 of 9)	16	72816786	73082274	265489	2	463	uc002fck.3	20183	ENSG00000140836	ZFHX3	zinc finger homeobox 3	FALSE	FALSE	FALSE	TRUE	FALSE	FALSE
20200205_TTNGFP_D4_GATA6ChIP_001_peak_11575	chr16	74038866	74038985	120	*	14.1	+	Distal Intergenic	16	74330673	74340186	9514	1	5713	uc002fcq.3	-291688	ENSG00000103035	PSMD7	proteasome 26S subunit, non-ATPase 7	FALSE	FALSE	FALSE	FALSE	FALSE	FALSE
20200205_TTNGFP_D4_GATA6ChIP_001_peak_11576	chr16	74296716	74296835	120	*	9.4	+	Distal Intergenic	16	74330673	74340186	9514	1	5713	uc002fcq.3	-33838	ENSG00000103035	PSMD7	proteasome 26S subunit, non-ATPase 7	FALSE	FALSE	FALSE	FALSE	FALSE	FALSE
20200205_TTNGFP_D4_GATA6ChIP_001_peak_11577	chr16	74359313	74359551	239	*	12	+	Distal Intergenic	16	74330673	74340186	9514	1	5713	uc010vmr.2	28640	ENSG00000103035	PSMD7	proteasome 26S subunit, non-ATPase 7	FALSE	FALSE	FALSE	FALSE	FALSE	FALSE
20200205_TTNGFP_D4_GATA6ChIP_001_peak_11578	chr16	74364796	74365050	255	*	20.6	+	Downstream (1-2kb)	16	74330673	74340186	9514	1	5713	uc010vmr.2	34123	ENSG00000103035	PSMD7	proteasome 26S subunit, non-ATPase 7	FALSE	FALSE	FALSE	FALSE	FALSE	FALSE
20200205_TTNGFP_D4_GATA6ChIP_001_peak_1158	chr1	19062096	19062394	299	*	21.8	+	Exon (uc001bay.3/5081, exon 8 of 8)	1	18957500	19075360	117861	1	5081	uc010oct.2	104596	ENSG00000009709	PAX7	paired box 7	FALSE	FALSE	FALSE	FALSE	FALSE	FALSE
20200205_TTNGFP_D4_GATA6ChIP_001_peak_11581	chr16	74495068	74495259	192	*	13.9	+	Intron (uc002fcw.4/2734, intron 21 of 25)	16	74447477	74455649	8173	2	497190	uc010vmw.1	-39419	ENSG00000140839	CLEC18B	C-type lectin domain family 18 member B	FALSE	FALSE	FALSE	FALSE	FALSE	FALSE
20200205_TTNGFP_D4_GATA6ChIP_001_peak_11583	chr16	74763801	74764032	232	*	19.5	+	Intron (uc002fde.2/79152, intron 2 of 6)	16	74746856	74751004	4149	2	79152	uc002fdd.2	-12797	ENSG00000103089	FA2H	fatty acid 2-hydroxylase	FALSE	FALSE	FALSE	FALSE	FALSE	FALSE
20200205_TTNGFP_D4_GATA6ChIP_001_peak_11584	chr16	74772390	74772519	130	*	16.3	+	Intron (uc002fde.2/79152, intron 2 of 6)	16	74746856	74751004	4149	2	79152	uc002fdd.2	-21386	ENSG00000103089	FA2H	fatty acid 2-hydroxylase	FALSE	FALSE	FALSE	FALSE	FALSE	FALSE
20200205_TTNGFP_D4_GATA6ChIP_001_peak_11589	chr16	75262600	75262806	207	*	9.8	+	Downstream (<1kb)	16	75262928	75270401	7474	2	9564	uc002fdt.3	7595	ENSG00000050820	BCAR1	BCAR1 scaffold protein, Cas family member	FALSE	FALSE	FALSE	FALSE	FALSE	FALSE
20200205_TTNGFP_D4_GATA6ChIP_001_peak_1159	chr1	19104412	19104576	165	*	13.2	+	Distal Intergenic	1	19166093	19186155	20063	2	80834	uc001bba.1	81579	ENSG00000179002	TAS1R2	taste 1 receptor member 2	FALSE	FALSE	FALSE	FALSE	FALSE	FALSE
20200205_TTNGFP_D4_GATA6ChIP_001_peak_11591	chr16	75272881	75273243	363	*	24.4	+	Promoter (<=1kb)	16	75262928	75272980	10053	2	9564	uc002fdu.3	0	ENSG00000050820	BCAR1	BCAR1 scaffold protein, Cas family member	FALSE	FALSE	FALSE	FALSE	FALSE	FALSE
20200205_TTNGFP_D4_GATA6ChIP_001_peak_11592	chr16	75275555	75275712	158	*	8.8	+	Promoter (2-3kb)	16	75262928	75272980	10053	2	9564	uc002fdu.3	-2575	ENSG00000050820	BCAR1	BCAR1 scaffold protein, Cas family member	FALSE	FALSE	FALSE	FALSE	FALSE	FALSE
20200205_TTNGFP_D4_GATA6ChIP_001_peak_11595	chr16	75310652	75310788	137	*	9.1	+	Promoter (8-9kb)	16	75262928	75301951	39024	2	9564	uc002fdx.3	-8701	ENSG00000050820	BCAR1	BCAR1 scaffold protein, Cas family member	FALSE	FALSE	FALSE	FALSE	FALSE	FALSE
20200205_TTNGFP_D4_GATA6ChIP_001_peak_11596	chr16	75433809	75433926	118	*	11	+	Intron (uc002fdy.3/10428, intron 4 of 6)	16	75327608	75467387	139780	2	10428	uc002fdy.3	33461	ENSG00000153774	CFDP1	craniofacial development protein 1	FALSE	FALSE	FALSE	TRUE	FALSE	FALSE
20200205_TTNGFP_D4_GATA6ChIP_001_peak_11597	chr16	75512826	75513151	326	*	28.9	+	Exon (uc002fef.3/4166, exon 3 of 3)	16	75479881	75498584	18704	2	124491	uc002fee.1	-14242	ENSG00000166822	TMEM170A	transmembrane protein 170A	FALSE	FALSE	FALSE	FALSE	FALSE	FALSE
20200205_TTNGFP_D4_GATA6ChIP_001_peak_11598	chr16	75530208	75530332	125	*	7.9	+	Promoter (1-2kb)	16	75510949	75528926	17978	2	4166	uc002feh.1	-1282	ENSG00000183196	CHST6	carbohydrate sulfotransferase 6	FALSE	FALSE	FALSE	FALSE	FALSE	FALSE
20200205_TTNGFP_D4_GATA6ChIP_001_peak_116	chr1	1462601	1462816	216	*	15.1	+	Intron (uc001afz.2/55210, intron 13 of 15)	1	1470158	1475740	5583	2	339453	uc009vkf.3	12924	ENSG00000205090	TMEM240	transmembrane protein 240	FALSE	FALSE	FALSE	FALSE	FALSE	FALSE
20200205_TTNGFP_D4_GATA6ChIP_001_peak_1160	chr1	19131300	19131516	217	*	22.9	+	Distal Intergenic	1	19166093	19186155	20063	2	80834	uc001bba.1	54639	ENSG00000179002	TAS1R2	taste 1 receptor member 2	TRUE	FALSE	FALSE	FALSE	FALSE	FALSE
20200205_TTNGFP_D4_GATA6ChIP_001_peak_11600	chr16	75596053	75596215	163	*	14.7	+	Promoter (4-5kb)	16	75600249	75611779	11531	1	11345	uc002fen.3	-4034	ENSG00000034713	GABARAPL2	GABA type A receptor associated protein like 2	FALSE	FALSE	FALSE	TRUE	FALSE	FALSE
20200205_TTNGFP_D4_GATA6ChIP_001_peak_11602	chr16	77153809	77154052	244	*	13.9	+	Distal Intergenic	16	77224836	77233543	8708	1	22879	uc002fez.3	-70784	ENSG00000103111	MON1B	MON1 homolog B, secretory trafficking associated	FALSE	FALSE	FALSE	FALSE	FALSE	TRUE
20200205_TTNGFP_D4_GATA6ChIP_001_peak_11604	chr16	77818726	77818843	118	*	12.9	+	Promoter (3-4kb)	16	77822483	78014001	191519	1	57687	uc002ffg.1	-3640	ENSG00000171724	VAT1L	vesicle amine transport 1 like	FALSE	FALSE	FALSE	FALSE	FALSE	FALSE
20200205_TTNGFP_D4_GATA6ChIP_001_peak_11605	chr16	77999418	77999675	258	*	40.1	+	Intron (uc002ffg.1/57687, intron 7 of 8)	16	78056443	78066001	9559	1	10143	uc002ffh.5	-56768	ENSG00000166509	CLEC3A	C-type lectin domain family 3 member A	TRUE	FALSE	FALSE	FALSE	TRUE	TRUE
20200205_TTNGFP_D4_GATA6ChIP_001_peak_11607	chr16	78133251	78133533	283	*	20.1	+	Promoter (<=1kb)	16	78133327	78134096	770	1	51741	uc002ffi.2	0	ENSG00000186153	WWOX	WW domain containing oxidoreductase	FALSE	FALSE	FALSE	FALSE	TRUE	TRUE
20200205_TTNGFP_D4_GATA6ChIP_001_peak_11608	chr16	79632629	79632857	229	*	20	+	Promoter (1-2kb)	16	79627745	79634622	6878	2	4094	uc002ffm.3	1765	ENSG00000178573	MAF	MAF bZIP transcription factor	TRUE	FALSE	FALSE	FALSE	FALSE	TRUE
20200205_TTNGFP_D4_GATA6ChIP_001_peak_1161	chr1	19144213	19144345	133	*	13.8	+	Distal Intergenic	1	19166093	19186155	20063	2	80834	uc001bba.1	41810	ENSG00000179002	TAS1R2	taste 1 receptor member 2	FALSE	FALSE	FALSE	FALSE	FALSE	FALSE
20200205_TTNGFP_D4_GATA6ChIP_001_peak_11610	chr16	80351379	80351830	452	*	38.3	+	Distal Intergenic	16	80574854	80584541	9688	1	83657	uc002ffo.3	-223024	ENSG00000168589	DYNLRB2	dynein light chain roadblock-type 2	TRUE	FALSE	FALSE	FALSE	TRUE	TRUE
20200205_TTNGFP_D4_GATA6ChIP_001_peak_11611	chr16	80639805	80640122	318	*	16.2	+	Intron (uc002ffs.3/124359, intron 6 of 6)	16	80574854	80584541	9688	1	83657	uc002ffq.3	64951	ENSG00000168589	DYNLRB2	dynein light chain roadblock-type 2	FALSE	FALSE	FALSE	FALSE	FALSE	FALSE
20200205_TTNGFP_D4_GATA6ChIP_001_peak_11613	chr16	80988249	80988401	153	*	13.8	+	Distal Intergenic	16	81040103	81056487	16385	1	55839	uc002ffw.4	-51702	ENSG00000166451	CENPN	centromere protein N	FALSE	FALSE	FALSE	FALSE	FALSE	FALSE
20200205_TTNGFP_D4_GATA6ChIP_001_peak_11614	chr16	81155201	81155460	260	*	12.1	+	5' UTR	16	81134484	81169977	35494	2	114780	uc002fgf.1	14517	ENSG00000166473	PKD1L2	polycystin 1 like 2 (gene/pseudogene)	FALSE	TRUE	TRUE	FALSE	FALSE	FALSE
20200205_TTNGFP_D4_GATA6ChIP_001_peak_11615	chr16	81190441	81190877	437	*	29.4	+	Exon (uc002fgg.1/114780, exon 13 of 32)	16	81134484	81169977	35494	2	114780	uc002fgf.1	-20464	ENSG00000166473	PKD1L2	polycystin 1 like 2 (gene/pseudogene)	FALSE	TRUE	TRUE	FALSE	FALSE	FALSE
20200205_TTNGFP_D4_GATA6ChIP_001_peak_11616	chr16	81199117	81199408	292	*	23.8	+	Intron (uc002fgg.1/114780, intron 8 of 31)	16	81204820	81211588	6769	2	114780	uc002fgk.1	12180	ENSG00000166473	PKD1L2	polycystin 1 like 2 (gene/pseudogene)	FALSE	TRUE	TRUE	FALSE	FALSE	FALSE
20200205_TTNGFP_D4_GATA6ChIP_001_peak_11618	chr16	81502451	81502669	219	*	13	+	Intron (uc002fgp.3/80790, intron 1 of 20)	16	81478775	81745367	266593	1	80790	uc002fgp.3	23676	ENSG00000153815	CMIP	c-Maf inducing protein	FALSE	FALSE	FALSE	FALSE	FALSE	FALSE
20200205_TTNGFP_D4_GATA6ChIP_001_peak_11619	chr16	81506522	81506771	250	*	24.4	+	Intron (uc002fgp.3/80790, intron 1 of 20)	16	81528954	81745367	216414	1	80790	uc002fgq.2	-22183	ENSG00000153815	CMIP	c-Maf inducing protein	TRUE	FALSE	FALSE	FALSE	FALSE	FALSE
20200205_TTNGFP_D4_GATA6ChIP_001_peak_11620	chr16	81592384	81592699	316	*	38.4	+	Intron (uc002fgp.3/80790, intron 1 of 20)	16	81643912	81745367	101456	1	80790	uc010vnq.2	-51213	ENSG00000153815	CMIP	c-Maf inducing protein	TRUE	FALSE	FALSE	FALSE	TRUE	TRUE
20200205_TTNGFP_D4_GATA6ChIP_001_peak_11621	chr16	81658759	81659098	340	*	28.6	+	Intron (uc002fgp.3/80790, intron 3 of 20)	16	81643912	81745367	101456	1	80790	uc010vnq.2	14847	ENSG00000153815	CMIP	c-Maf inducing protein	FALSE	FALSE	FALSE	FALSE	FALSE	FALSE
20200205_TTNGFP_D4_GATA6ChIP_001_peak_11622	chr16	81661649	81661785	137	*	7.9	+	Intron (uc002fgp.3/80790, intron 3 of 20)	16	81678963	81745367	66405	1	80790	uc002fgr.2	-17178	ENSG00000153815	CMIP	c-Maf inducing protein	FALSE	FALSE	FALSE	FALSE	FALSE	FALSE
20200205_TTNGFP_D4_GATA6ChIP_001_peak_11623	chr16	81674918	81675331	414	*	34.4	+	Promoter (3-4kb)	16	81678963	81745367	66405	1	80790	uc002fgr.2	-3632	ENSG00000153815	CMIP	c-Maf inducing protein	TRUE	FALSE	FALSE	FALSE	TRUE	TRUE
20200205_TTNGFP_D4_GATA6ChIP_001_peak_11624	chr16	81697824	81698023	200	*	17.3	+	Promoter (<=1kb)	16	81698959	81700879	1921	1	100129617	uc021tlt.1	-936	NA	LOC100129617	uncharacterized LOC100129617	FALSE	FALSE	FALSE	FALSE	FALSE	FALSE
20200205_TTNGFP_D4_GATA6ChIP_001_peak_11625	chr16	81711751	81712008	258	*	15.4	+	Exon (uc002fgp.3/80790, exon 10 of 21)	16	81698959	81700879	1921	1	100129617	uc021tlt.1	12792	NA	LOC100129617	uncharacterized LOC100129617	FALSE	FALSE	FALSE	FALSE	FALSE	FALSE
20200205_TTNGFP_D4_GATA6ChIP_001_peak_11627	chr16	81738957	81739076	120	*	14.7	+	Intron (uc002fgp.3/80790, intron 18 of 20)	16	81698959	81700879	1921	1	100129617	uc021tlt.1	39998	NA	LOC100129617	uncharacterized LOC100129617	FALSE	FALSE	FALSE	FALSE	FALSE	FALSE
20200205_TTNGFP_D4_GATA6ChIP_001_peak_11628	chr16	81787480	81787638	159	*	16	+	Distal Intergenic	16	81812899	81991899	179001	1	5336	uc002fgt.3	-25261	ENSG00000197943	PLCG2	phospholipase C gamma 2	FALSE	FALSE	FALSE	TRUE	FALSE	FALSE
20200205_TTNGFP_D4_GATA6ChIP_001_peak_11629	chr16	81900390	81900655	266	*	23.8	+	Intron (uc002fgt.3/5336, intron 5 of 32)	16	81819351	81955215	135865	1	5336	uc010chg.1	81039	ENSG00000197943	PLCG2	phospholipase C gamma 2	FALSE	FALSE	FALSE	TRUE	FALSE	FALSE
20200205_TTNGFP_D4_GATA6ChIP_001_peak_11631	chr16	82671158	82671286	129	*	10	+	Intron (uc010chh.3/1012, intron 1 of 4)	16	82660399	83830215	1169817	1	1012	uc010vnu.2	10759	ENSG00000140945	CDH13	cadherin 13	FALSE	TRUE	TRUE	TRUE	FALSE	FALSE
20200205_TTNGFP_D4_GATA6ChIP_001_peak_11634	chr16	83933229	83933385	157	*	6.1	+	Promoter (<=1kb)	16	83932730	83949787	17058	1	23417	uc002fgz.3	499	ENSG00000103150	MLYCD	malonyl-CoA decarboxylase	FALSE	FALSE	FALSE	TRUE	FALSE	TRUE
20200205_TTNGFP_D4_GATA6ChIP_001_peak_11635	chr16	83955681	83955886	206	*	20.7	+	Distal Intergenic	16	83932730	83949787	17058	1	23417	uc002fgz.3	22951	ENSG00000103150	MLYCD	malonyl-CoA decarboxylase	FALSE	FALSE	FALSE	TRUE	FALSE	FALSE
20200205_TTNGFP_D4_GATA6ChIP_001_peak_11637	chr16	83980144	83980328	185	*	13	+	Promoter (2-3kb)	16	83982672	83999937	17266	1	29948	uc002fha.4	-2344	ENSG00000140961	OSGIN1	oxidative stress induced growth inhibitor 1	FALSE	FALSE	FALSE	FALSE	FALSE	FALSE
20200205_TTNGFP_D4_GATA6ChIP_001_peak_11639	chr16	84034331	84034537	207	*	13.2	+	Exon (uc002fhd.3/54550, exon 11 of 13)	16	84005516	84036379	30864	1	54550	uc002fhe.3	28815	ENSG00000103154	NECAB2	N-terminal EF-hand calcium binding protein 2	FALSE	FALSE	FALSE	FALSE	FALSE	FALSE
20200205_TTNGFP_D4_GATA6ChIP_001_peak_1164	chr1	19198555	19199111	557	*	58	+	3' UTR	1	19209696	19209769	74	2	100616120	uc021ohm.2	10658	ENSG00000265606	MIR4695	microRNA 4695	FALSE	FALSE	FALSE	FALSE	FALSE	FALSE
20200205_TTNGFP_D4_GATA6ChIP_001_peak_11640	chr16	84054159	84054298	140	*	17	+	Intron (uc002fhg.1/146167, intron 6 of 9)	16	84043389	84075762	32374	2	146167	uc002fhg.1	21464	ENSG00000166558	SLC38A8	solute carrier family 38 member 8	FALSE	FALSE	FALSE	FALSE	FALSE	FALSE
20200205_TTNGFP_D4_GATA6ChIP_001_peak_11641	chr16	84076932	84077512	581	*	38.9	+	Promoter (1-2kb)	16	84043389	84075762	32374	2	146167	uc002fhg.1	-1170	ENSG00000166558	SLC38A8	solute carrier family 38 member 8	TRUE	FALSE	FALSE	FALSE	TRUE	FALSE
20200205_TTNGFP_D4_GATA6ChIP_001_peak_11642	chr16	84078604	84078728	125	*	15.6	+	Promoter (2-3kb)	16	84043389	84075762	32374	2	146167	uc002fhg.1	-2842	ENSG00000166558	SLC38A8	solute carrier family 38 member 8	FALSE	FALSE	FALSE	FALSE	FALSE	FALSE
20200205_TTNGFP_D4_GATA6ChIP_001_peak_11643	chr16	84086052	84086190	139	*	16.8	+	Downstream (1-2kb)	16	84043389	84075762	32374	2	146167	uc002fhg.1	-10290	ENSG00000166558	SLC38A8	solute carrier family 38 member 8	FALSE	FALSE	FALSE	FALSE	FALSE	FALSE
20200205_TTNGFP_D4_GATA6ChIP_001_peak_11644	chr16	84096307	84096675	369	*	55.2	+	Intron (uc002fhh.3/8720, intron 8 of 11)	16	84087369	84109038	21670	2	8720	uc002fhh.3	12363	ENSG00000140943	MBTPS1	membrane bound transcription factor peptidase, site 1	TRUE	FALSE	FALSE	FALSE	TRUE	TRUE
20200205_TTNGFP_D4_GATA6ChIP_001_peak_11645	chr16	84109101	84109217	117	*	10.6	+	Promoter (<=1kb)	16	84087369	84109038	21670	2	8720	uc002fhh.3	-63	ENSG00000140943	MBTPS1	membrane bound transcription factor peptidase, site 1	FALSE	FALSE	FALSE	FALSE	FALSE	FALSE
20200205_TTNGFP_D4_GATA6ChIP_001_peak_11646	chr16	84140392	84140630	239	*	20.7	+	Intron (uc002fhi.3/8720, intron 1 of 22)	16	84087369	84150517	63149	2	8720	uc002fhi.3	9887	ENSG00000140943	MBTPS1	membrane bound transcription factor peptidase, site 1	TRUE	FALSE	FALSE	FALSE	FALSE	FALSE
20200205_TTNGFP_D4_GATA6ChIP_001_peak_11648	chr16	84213007	84213433	427	*	28.9	+	Exon (uc002fhm.3/9013, exon 15 of 15)	16	84211453	84220676	9224	2	9013	uc002fhm.3	7243	ENSG00000103168	TAF1C	TATA-box binding protein associated factor, RNA polymerase I subunit C	FALSE	FALSE	FALSE	FALSE	FALSE	FALSE
20200205_TTNGFP_D4_GATA6ChIP_001_peak_11649	chr16	84240223	84240554	332	*	34.4	+	Distal Intergenic	16	84224723	84230772	6050	1	161931	uc002fhr.2	15500	ENSG00000140955	ADAD2	adenosine deaminase domain containing 2	FALSE	FALSE	FALSE	FALSE	FALSE	FALSE
20200205_TTNGFP_D4_GATA6ChIP_001_peak_11650	chr16	84256051	84256226	176	*	15	+	Exon (uc010voc.2/93107, exon 3 of 3)	16	84254741	84273356	18616	2	93107	uc010voc.2	17130	ENSG00000168418	KCNG4	potassium voltage-gated channel modifier subfamily G member 4	FALSE	FALSE	FALSE	FALSE	FALSE	FALSE
20200205_TTNGFP_D4_GATA6ChIP_001_peak_11651	chr16	84263011	84263191	181	*	15.6	+	Intron (uc010voc.2/93107, intron 2 of 2)	16	84254741	84273356	18616	2	93107	uc010voc.2	10165	ENSG00000168418	KCNG4	potassium voltage-gated channel modifier subfamily G member 4	FALSE	FALSE	FALSE	FALSE	FALSE	FALSE
20200205_TTNGFP_D4_GATA6ChIP_001_peak_11653	chr16	84341740	84342258	519	*	39.4	+	Intron (uc002fhv.3/58189, intron 1 of 6)	16	84328401	84363450	35050	1	58189	uc002fhw.3	13339	ENSG00000103175	WFDC1	WAP four-disulfide core domain 1	FALSE	FALSE	FALSE	FALSE	TRUE	TRUE
20200205_TTNGFP_D4_GATA6ChIP_001_peak_11654	chr16	84441853	84442164	312	*	24.4	+	Promoter (1-2kb)	16	84440194	84497793	57600	1	9914	uc002fhz.3	1659	ENSG00000064270	ATP2C2	ATPase secretory pathway Ca2+ transporting 2	FALSE	FALSE	FALSE	FALSE	FALSE	FALSE
20200205_TTNGFP_D4_GATA6ChIP_001_peak_11658	chr16	84493599	84493793	195	*	12.4	+	Promoter (<=1kb)	16	84493212	84497793	4582	1	9914	uc002fia.3	387	ENSG00000064270	ATP2C2	ATPase secretory pathway Ca2+ transporting 2	TRUE	FALSE	FALSE	FALSE	FALSE	FALSE
20200205_TTNGFP_D4_GATA6ChIP_001_peak_1166	chr1	19215623	19215762	140	*	16.7	+	Promoter (1-2kb)	1	19197924	19217385	19462	2	8659	uc010ocu.2	1623	ENSG00000159423	ALDH4A1	aldehyde dehydrogenase 4 family member A1	FALSE	FALSE	TRUE	FALSE	FALSE	FALSE
20200205_TTNGFP_D4_GATA6ChIP_001_peak_11661	chr16	84582602	84582808	207	*	16.7	+	Distal Intergenic	16	84509966	84538288	28323	2	57707	uc010vod.2	-44314	ENSG00000140950	MEAK7	MTOR associated protein, eak-7 homolog	FALSE	FALSE	FALSE	FALSE	FALSE	FALSE
20200205_TTNGFP_D4_GATA6ChIP_001_peak_11662	chr16	84613599	84613784	186	*	22.1	+	Intron (uc002fid.3/23406, intron 3 of 3)	16	84599204	84651669	52466	2	23406	uc002fid.3	37885	ENSG00000103187	COTL1	coactosin like F-actin binding protein 1	FALSE	FALSE	TRUE	FALSE	FALSE	FALSE
20200205_TTNGFP_D4_GATA6ChIP_001_peak_11663	chr16	84820511	84820788	278	*	24.1	+	Distal Intergenic	16	84853587	84873626	20040	1	83716	uc002fik.4	-32799	ENSG00000103196	CRISPLD2	cysteine rich secretory protein LCCL domain containing 2	FALSE	FALSE	FALSE	FALSE	FALSE	FALSE
20200205_TTNGFP_D4_GATA6ChIP_001_peak_11664	chr16	84844055	84844296	242	*	15.4	+	Promoter (9-10kb)	16	84853587	84873626	20040	1	83716	uc002fik.4	-9291	ENSG00000103196	CRISPLD2	cysteine rich secretory protein LCCL domain containing 2	FALSE	FALSE	FALSE	FALSE	FALSE	FALSE
20200205_TTNGFP_D4_GATA6ChIP_001_peak_11665	chr16	84854429	84854567	139	*	13.3	+	Promoter (<=1kb)	16	84853587	84943116	89530	1	83716	uc010voh.1	842	ENSG00000103196	CRISPLD2	cysteine rich secretory protein LCCL domain containing 2	FALSE	FALSE	FALSE	FALSE	FALSE	FALSE
20200205_TTNGFP_D4_GATA6ChIP_001_peak_11667	chr16	84871939	84872075	137	*	15.9	+	5' UTR	16	84853587	84943116	89530	1	83716	uc010voh.1	18352	ENSG00000103196	CRISPLD2	cysteine rich secretory protein LCCL domain containing 2	FALSE	FALSE	FALSE	FALSE	FALSE	FALSE
20200205_TTNGFP_D4_GATA6ChIP_001_peak_11668	chr16	84872254	84872439	186	*	21.3	+	Exon (uc002fik.4/83716, exon 2 of 2)	16	84853587	84943116	89530	1	83716	uc010voh.1	18667	ENSG00000103196	CRISPLD2	cysteine rich secretory protein LCCL domain containing 2	FALSE	FALSE	FALSE	FALSE	FALSE	FALSE
20200205_TTNGFP_D4_GATA6ChIP_001_peak_11669	chr16	84944354	84944530	177	*	9.2	+	Distal Intergenic	16	84853587	84943116	89530	1	83716	uc010voh.1	90767	ENSG00000103196	CRISPLD2	cysteine rich secretory protein LCCL domain containing 2	TRUE	FALSE	FALSE	FALSE	FALSE	FALSE
20200205_TTNGFP_D4_GATA6ChIP_001_peak_1167	chr1	19222742	19222940	199	*	30.9	+	Promoter (5-6kb)	1	19197924	19217385	19462	2	8659	uc010ocu.2	-5357	ENSG00000159423	ALDH4A1	aldehyde dehydrogenase 4 family member A1	FALSE	FALSE	TRUE	FALSE	FALSE	FALSE
20200205_TTNGFP_D4_GATA6ChIP_001_peak_11670	chr16	84966627	84966746	120	*	10.1	+	Distal Intergenic	16	85008067	85045141	37075	2	55625	uc002fiq.2	78395	ENSG00000153786	ZDHHC7	zinc finger DHHC-type containing 7	FALSE	FALSE	FALSE	FALSE	FALSE	FALSE
20200205_TTNGFP_D4_GATA6ChIP_001_peak_11671	chr16	84986219	84986701	483	*	110.3	+	Distal Intergenic	16	85008067	85045141	37075	2	55625	uc002fiq.2	58440	ENSG00000153786	ZDHHC7	zinc finger DHHC-type containing 7	TRUE	FALSE	FALSE	FALSE	TRUE	TRUE
20200205_TTNGFP_D4_GATA6ChIP_001_peak_11672	chr16	84987237	84987364	128	*	15	+	Distal Intergenic	16	85008067	85045141	37075	2	55625	uc002fiq.2	57777	ENSG00000153786	ZDHHC7	zinc finger DHHC-type containing 7	FALSE	FALSE	FALSE	FALSE	FALSE	FALSE
20200205_TTNGFP_D4_GATA6ChIP_001_peak_11673	chr16	84993434	84993573	140	*	17.1	+	Distal Intergenic	16	85008067	85045141	37075	2	55625	uc002fiq.2	51568	ENSG00000153786	ZDHHC7	zinc finger DHHC-type containing 7	TRUE	FALSE	FALSE	FALSE	FALSE	FALSE
20200205_TTNGFP_D4_GATA6ChIP_001_peak_11676	chr16	85081059	85081225	167	*	12.7	+	Intron (uc010voj.2/9764, intron 1 of 11)	16	85061410	85127828	66419	1	9764	uc002fiu.3	19649	ENSG00000135709	KIAA0513	KIAA0513	FALSE	FALSE	FALSE	FALSE	FALSE	FALSE
20200205_TTNGFP_D4_GATA6ChIP_001_peak_11678	chr16	85143998	85144177	180	*	12.9	+	Promoter (1-2kb)	16	85131965	85146114	14150	2	339145	uc021tlz.1	1937	ENSG00000153789	FAM92B	family with sequence similarity 92 member B	FALSE	FALSE	FALSE	FALSE	FALSE	FALSE
20200205_TTNGFP_D4_GATA6ChIP_001_peak_1168	chr1	19229307	19229690	384	*	35.3	+	Promoter (<=1kb)	1	19197924	19229293	31370	2	8659	uc021ohl.1	-14	ENSG00000159423	ALDH4A1	aldehyde dehydrogenase 4 family member A1	TRUE	FALSE	TRUE	FALSE	TRUE	TRUE
20200205_TTNGFP_D4_GATA6ChIP_001_peak_11680	chr16	85177857	85178115	259	*	23.3	+	Intron (uc021tmb.1/400548, intron 2 of 2)	16	85170756	85183049	12294	1	400548	uc021tmb.1	7101	ENSG00000278214	LINC02139	long intergenic non-protein coding RNA 2139	TRUE	FALSE	FALSE	FALSE	TRUE	FALSE
20200205_TTNGFP_D4_GATA6ChIP_001_peak_11681	chr16	85185870	85186160	291	*	20.7	+	Distal Intergenic	16	85170756	85183049	12294	1	400548	uc021tmb.1	15114	ENSG00000278214	LINC02139	long intergenic non-protein coding RNA 2139	FALSE	FALSE	FALSE	FALSE	FALSE	FALSE
20200205_TTNGFP_D4_GATA6ChIP_001_peak_11682	chr16	85196786	85196946	161	*	9.5	+	Distal Intergenic	16	85170756	85183049	12294	1	400548	uc021tmb.1	26030	ENSG00000278214	LINC02139	long intergenic non-protein coding RNA 2139	FALSE	FALSE	FALSE	FALSE	FALSE	FALSE
20200205_TTNGFP_D4_GATA6ChIP_001_peak_11683	chr16	85208833	85208960	128	*	17.9	+	Distal Intergenic	16	85170756	85183049	12294	1	400548	uc021tmb.1	38077	ENSG00000278214	LINC02139	long intergenic non-protein coding RNA 2139	FALSE	FALSE	FALSE	FALSE	FALSE	FALSE
20200205_TTNGFP_D4_GATA6ChIP_001_peak_11684	chr16	85210462	85210661	200	*	15.6	+	Distal Intergenic	16	85170756	85183049	12294	1	400548	uc021tmb.1	39706	ENSG00000278214	LINC02139	long intergenic non-protein coding RNA 2139	FALSE	FALSE	FALSE	FALSE	FALSE	FALSE
20200205_TTNGFP_D4_GATA6ChIP_001_peak_11685	chr16	85214726	85215188	463	*	36.3	+	Distal Intergenic	16	85170756	85183049	12294	1	400548	uc021tmb.1	43970	ENSG00000278214	LINC02139	long intergenic non-protein coding RNA 2139	TRUE	FALSE	FALSE	FALSE	FALSE	TRUE
20200205_TTNGFP_D4_GATA6ChIP_001_peak_11688	chr16	85236948	85237166	219	*	24.4	+	Distal Intergenic	16	85170756	85183049	12294	1	400548	uc021tmb.1	66192	ENSG00000278214	LINC02139	long intergenic non-protein coding RNA 2139	FALSE	FALSE	FALSE	FALSE	FALSE	FALSE
20200205_TTNGFP_D4_GATA6ChIP_001_peak_1169	chr1	19253703	19253957	255	*	15.7	+	Intron (uc001bbd.2/126917, intron 1 of 8)	1	19197924	19229293	31370	2	8659	uc021ohl.1	-24410	ENSG00000159423	ALDH4A1	aldehyde dehydrogenase 4 family member A1	FALSE	FALSE	TRUE	FALSE	FALSE	FALSE
20200205_TTNGFP_D4_GATA6ChIP_001_peak_11690	chr16	85268176	85268960	785	*	71.3	+	Distal Intergenic	16	85316564	85321685	5122	1	197196	uc021tmc.1	-47604	ENSG00000179219	LINC00311	long intergenic non-protein coding RNA 311	TRUE	FALSE	FALSE	FALSE	TRUE	TRUE
20200205_TTNGFP_D4_GATA6ChIP_001_peak_11693	chr16	85281466	85281613	148	*	17.6	+	Distal Intergenic	16	85316564	85321685	5122	1	197196	uc021tmc.1	-34951	ENSG00000179219	LINC00311	long intergenic non-protein coding RNA 311	FALSE	FALSE	FALSE	FALSE	FALSE	FALSE
20200205_TTNGFP_D4_GATA6ChIP_001_peak_11694	chr16	85287656	85287809	154	*	12.9	+	Distal Intergenic	16	85316564	85321685	5122	1	197196	uc021tmc.1	-28755	ENSG00000179219	LINC00311	long intergenic non-protein coding RNA 311	FALSE	FALSE	FALSE	FALSE	FALSE	FALSE
20200205_TTNGFP_D4_GATA6ChIP_001_peak_11697	chr16	85316617	85316796	180	*	17.4	+	Promoter (<=1kb)	16	85316564	85321685	5122	1	197196	uc021tmc.1	53	ENSG00000179219	LINC00311	long intergenic non-protein coding RNA 311	FALSE	FALSE	FALSE	FALSE	FALSE	FALSE
20200205_TTNGFP_D4_GATA6ChIP_001_peak_11698	chr16	85323033	85323296	264	*	23.5	+	Distal Intergenic	16	85316564	85321685	5122	1	197196	uc021tmc.1	6469	ENSG00000179219	LINC00311	long intergenic non-protein coding RNA 311	FALSE	FALSE	FALSE	FALSE	FALSE	FALSE
20200205_TTNGFP_D4_GATA6ChIP_001_peak_11699	chr16	85325212	85325465	254	*	17.3	+	Distal Intergenic	16	85316564	85321685	5122	1	197196	uc021tmc.1	8648	ENSG00000179219	LINC00311	long intergenic non-protein coding RNA 311	FALSE	FALSE	FALSE	FALSE	FALSE	TRUE
20200205_TTNGFP_D4_GATA6ChIP_001_peak_117	chr1	1464833	1465000	168	*	16.7	+	Intron (uc001afz.2/55210, intron 15 of 15)	1	1470158	1475740	5583	2	339453	uc009vkf.3	10740	ENSG00000205090	TMEM240	transmembrane protein 240	FALSE	FALSE	FALSE	FALSE	FALSE	FALSE
20200205_TTNGFP_D4_GATA6ChIP_001_peak_1170	chr1	19255397	19255562	166	*	16.2	+	Intron (uc001bbd.2/126917, intron 1 of 8)	1	19197924	19229293	31370	2	8659	uc021ohl.1	-26104	ENSG00000159423	ALDH4A1	aldehyde dehydrogenase 4 family member A1	FALSE	FALSE	TRUE	FALSE	FALSE	FALSE
20200205_TTNGFP_D4_GATA6ChIP_001_peak_11700	chr16	85329551	85329686	136	*	8.5	+	Distal Intergenic	16	85339832	85339931	100	2	100847022	uc031qxb.1	10245	ENSG00000266307	MIR5093	microRNA 5093	FALSE	FALSE	FALSE	FALSE	FALSE	FALSE
20200205_TTNGFP_D4_GATA6ChIP_001_peak_11701	chr16	85336468	85336609	142	*	12.1	+	Distal Intergenic	16	85339832	85339931	100	2	100847022	uc031qxb.1	3322	ENSG00000266307	MIR5093	microRNA 5093	FALSE	FALSE	FALSE	FALSE	FALSE	FALSE
20200205_TTNGFP_D4_GATA6ChIP_001_peak_11702	chr16	85341155	85341377	223	*	14.4	+	Promoter (1-2kb)	16	85339832	85339931	100	2	100847022	uc031qxb.1	-1224	ENSG00000266307	MIR5093	microRNA 5093	FALSE	FALSE	FALSE	FALSE	FALSE	TRUE
20200205_TTNGFP_D4_GATA6ChIP_001_peak_11703	chr16	85345594	85345792	199	*	15.4	+	Promoter (5-6kb)	16	85339832	85339931	100	2	100847022	uc031qxb.1	-5663	ENSG00000266307	MIR5093	microRNA 5093	FALSE	FALSE	FALSE	FALSE	FALSE	FALSE
20200205_TTNGFP_D4_GATA6ChIP_001_peak_11705	chr16	85351083	85351380	298	*	21	+	Distal Intergenic	16	85339832	85339931	100	2	100847022	uc031qxb.1	-11152	ENSG00000266307	MIR5093	microRNA 5093	FALSE	FALSE	FALSE	FALSE	FALSE	FALSE
20200205_TTNGFP_D4_GATA6ChIP_001_peak_11706	chr16	85361744	85362297	554	*	86	+	Distal Intergenic	16	85339832	85339931	100	2	100847022	uc031qxb.1	-21813	ENSG00000266307	MIR5093	microRNA 5093	TRUE	FALSE	FALSE	FALSE	TRUE	TRUE
20200205_TTNGFP_D4_GATA6ChIP_001_peak_11707	chr16	85370615	85370751	137	*	16	+	Distal Intergenic	16	85339832	85339931	100	2	100847022	uc031qxb.1	-30684	ENSG00000266307	MIR5093	microRNA 5093	FALSE	FALSE	FALSE	FALSE	FALSE	FALSE
20200205_TTNGFP_D4_GATA6ChIP_001_peak_11710	chr16	85391772	85391989	218	*	17.6	+	Distal Intergenic	16	85339832	85339931	100	2	100847022	uc031qxb.1	-51841	ENSG00000266307	MIR5093	microRNA 5093	FALSE	FALSE	FALSE	FALSE	FALSE	FALSE
20200205_TTNGFP_D4_GATA6ChIP_001_peak_11714	chr16	85411295	85411638	344	*	39.5	+	Distal Intergenic	16	85339832	85339931	100	2	100847022	uc031qxb.1	-71364	ENSG00000266307	MIR5093	microRNA 5093	TRUE	FALSE	FALSE	FALSE	FALSE	FALSE
20200205_TTNGFP_D4_GATA6ChIP_001_peak_11716	chr16	85415533	85416348	816	*	147	+	Distal Intergenic	16	85339832	85339931	100	2	100847022	uc031qxb.1	-75602	ENSG00000266307	MIR5093	microRNA 5093	TRUE	FALSE	FALSE	FALSE	TRUE	TRUE
20200205_TTNGFP_D4_GATA6ChIP_001_peak_11717	chr16	85419344	85419486	143	*	21.3	+	Distal Intergenic	16	85339832	85339931	100	2	100847022	uc031qxb.1	-79413	ENSG00000266307	MIR5093	microRNA 5093	FALSE	FALSE	FALSE	FALSE	FALSE	FALSE
20200205_TTNGFP_D4_GATA6ChIP_001_peak_11718	chr16	85424761	85424888	128	*	14.1	+	Distal Intergenic	16	85339832	85339931	100	2	100847022	uc031qxb.1	-84830	ENSG00000266307	MIR5093	microRNA 5093	FALSE	FALSE	FALSE	FALSE	FALSE	FALSE
20200205_TTNGFP_D4_GATA6ChIP_001_peak_1172	chr1	19274174	19274367	194	*	11.8	+	Intron (uc001bbd.2/126917, intron 1 of 8)	1	19230774	19282826	52053	2	126917	uc001bbd.2	8459	ENSG00000169991	IFFO2	intermediate filament family orphan 2	FALSE	FALSE	FALSE	FALSE	FALSE	FALSE
20200205_TTNGFP_D4_GATA6ChIP_001_peak_11720	chr16	85435792	85435981	190	*	13.8	+	Distal Intergenic	16	85339832	85339931	100	2	100847022	uc031qxb.1	-95861	ENSG00000266307	MIR5093	microRNA 5093	TRUE	FALSE	FALSE	FALSE	FALSE	FALSE
20200205_TTNGFP_D4_GATA6ChIP_001_peak_11721	chr16	85436507	85437190	684	*	95.1	+	Distal Intergenic	16	85339832	85339931	100	2	100847022	uc031qxb.1	-96576	ENSG00000266307	MIR5093	microRNA 5093	TRUE	FALSE	FALSE	FALSE	TRUE	TRUE
20200205_TTNGFP_D4_GATA6ChIP_001_peak_11722	chr16	85437449	85437705	257	*	15.9	+	Distal Intergenic	16	85339832	85339931	100	2	100847022	uc031qxb.1	-97518	ENSG00000266307	MIR5093	microRNA 5093	FALSE	FALSE	FALSE	FALSE	FALSE	FALSE
20200205_TTNGFP_D4_GATA6ChIP_001_peak_11724	chr16	85449290	85449446	157	*	13.5	+	Distal Intergenic	16	85339832	85339931	100	2	100847022	uc031qxb.1	-109359	ENSG00000266307	MIR5093	microRNA 5093	FALSE	FALSE	FALSE	FALSE	FALSE	FALSE
20200205_TTNGFP_D4_GATA6ChIP_001_peak_11729	chr16	85488048	85488508	461	*	25.1	+	Distal Intergenic	16	85339832	85339931	100	2	100847022	uc031qxb.1	-148117	ENSG00000266307	MIR5093	microRNA 5093	TRUE	FALSE	FALSE	FALSE	FALSE	FALSE
20200205_TTNGFP_D4_GATA6ChIP_001_peak_1173	chr1	19334154	19334526	373	*	41	+	Distal Intergenic	1	19230774	19282826	52053	2	126917	uc001bbd.2	-51328	ENSG00000169991	IFFO2	intermediate filament family orphan 2	TRUE	FALSE	FALSE	FALSE	TRUE	TRUE
20200205_TTNGFP_D4_GATA6ChIP_001_peak_11731	chr16	85495570	85495833	264	*	22.3	+	Distal Intergenic	16	85645029	85709812	64784	1	23199	uc002fiw.3	-149196	ENSG00000131149	GSE1	Gse1 coiled-coil protein	TRUE	FALSE	FALSE	FALSE	FALSE	FALSE
20200205_TTNGFP_D4_GATA6ChIP_001_peak_11732	chr16	85496000	85496227	228	*	21.8	+	Distal Intergenic	16	85645029	85709812	64784	1	23199	uc002fiw.3	-148802	ENSG00000131149	GSE1	Gse1 coiled-coil protein	FALSE	FALSE	FALSE	FALSE	TRUE	TRUE
20200205_TTNGFP_D4_GATA6ChIP_001_peak_11735	chr16	85535994	85536153	160	*	18.3	+	Distal Intergenic	16	85645029	85709812	64784	1	23199	uc002fiw.3	-108876	ENSG00000131149	GSE1	Gse1 coiled-coil protein	FALSE	FALSE	FALSE	FALSE	FALSE	FALSE
20200205_TTNGFP_D4_GATA6ChIP_001_peak_11736	chr16	85539668	85539801	134	*	13	+	Distal Intergenic	16	85645029	85709812	64784	1	23199	uc002fiw.3	-105228	ENSG00000131149	GSE1	Gse1 coiled-coil protein	FALSE	FALSE	FALSE	FALSE	FALSE	FALSE
20200205_TTNGFP_D4_GATA6ChIP_001_peak_11737	chr16	85542971	85543168	198	*	18.5	+	Distal Intergenic	16	85645029	85709812	64784	1	23199	uc002fiw.3	-101861	ENSG00000131149	GSE1	Gse1 coiled-coil protein	FALSE	FALSE	FALSE	FALSE	FALSE	FALSE
20200205_TTNGFP_D4_GATA6ChIP_001_peak_11738	chr16	85549538	85549683	146	*	15.9	+	Distal Intergenic	16	85645029	85709812	64784	1	23199	uc002fiw.3	-95346	ENSG00000131149	GSE1	Gse1 coiled-coil protein	FALSE	FALSE	FALSE	FALSE	FALSE	FALSE
20200205_TTNGFP_D4_GATA6ChIP_001_peak_1174	chr1	19359603	19359738	136	*	17.7	+	Distal Intergenic	1	19401000	19408140	7141	2	23352	uc001bbf.3	48402	ENSG00000127481	UBR4	ubiquitin protein ligase E3 component n-recognin 4	TRUE	FALSE	FALSE	TRUE	FALSE	FALSE
20200205_TTNGFP_D4_GATA6ChIP_001_peak_11740	chr16	85568754	85569567	814	*	200.7	+	Distal Intergenic	16	85645029	85709812	64784	1	23199	uc002fiw.3	-75462	ENSG00000131149	GSE1	Gse1 coiled-coil protein	TRUE	FALSE	FALSE	FALSE	TRUE	TRUE
20200205_TTNGFP_D4_GATA6ChIP_001_peak_11741	chr16	85569977	85570156	180	*	17.6	+	Distal Intergenic	16	85645029	85709812	64784	1	23199	uc002fiw.3	-74873	ENSG00000131149	GSE1	Gse1 coiled-coil protein	FALSE	FALSE	FALSE	FALSE	TRUE	FALSE
20200205_TTNGFP_D4_GATA6ChIP_001_peak_11742	chr16	85570876	85571222	347	*	29.4	+	Distal Intergenic	16	85645029	85709812	64784	1	23199	uc002fiw.3	-73807	ENSG00000131149	GSE1	Gse1 coiled-coil protein	FALSE	FALSE	FALSE	FALSE	FALSE	FALSE
20200205_TTNGFP_D4_GATA6ChIP_001_peak_11743	chr16	85588650	85589011	362	*	36.5	+	Distal Intergenic	16	85645029	85709812	64784	1	23199	uc002fiw.3	-56018	ENSG00000131149	GSE1	Gse1 coiled-coil protein	TRUE	FALSE	FALSE	FALSE	TRUE	FALSE
20200205_TTNGFP_D4_GATA6ChIP_001_peak_11744	chr16	85594953	85595207	255	*	18.8	+	Distal Intergenic	16	85645029	85709812	64784	1	23199	uc002fiw.3	-49822	ENSG00000131149	GSE1	Gse1 coiled-coil protein	TRUE	FALSE	FALSE	FALSE	FALSE	FALSE
20200205_TTNGFP_D4_GATA6ChIP_001_peak_11748	chr16	85632152	85632362	211	*	22.7	+	Distal Intergenic	16	85645029	85709812	64784	1	23199	uc002fiw.3	-12667	ENSG00000131149	GSE1	Gse1 coiled-coil protein	FALSE	FALSE	FALSE	FALSE	FALSE	FALSE
20200205_TTNGFP_D4_GATA6ChIP_001_peak_11749	chr16	85638698	85638884	187	*	23.9	+	Promoter (6-7kb)	16	85645029	85709812	64784	1	23199	uc002fiw.3	-6145	ENSG00000131149	GSE1	Gse1 coiled-coil protein	FALSE	FALSE	FALSE	FALSE	TRUE	FALSE
20200205_TTNGFP_D4_GATA6ChIP_001_peak_1175	chr1	19378713	19378854	142	*	15.3	+	Distal Intergenic	1	19401000	19408140	7141	2	23352	uc001bbf.3	29286	ENSG00000127481	UBR4	ubiquitin protein ligase E3 component n-recognin 4	FALSE	FALSE	FALSE	TRUE	FALSE	FALSE
20200205_TTNGFP_D4_GATA6ChIP_001_peak_11750	chr16	85641295	85642032	738	*	76.3	+	Promoter (2-3kb)	16	85645029	85709812	64784	1	23199	uc002fiw.3	-2997	ENSG00000131149	GSE1	Gse1 coiled-coil protein	TRUE	FALSE	FALSE	FALSE	FALSE	FALSE
20200205_TTNGFP_D4_GATA6ChIP_001_peak_11752	chr16	85646711	85647210	500	*	51.5	+	Promoter (<=1kb)	16	85646842	85709812	62971	1	23199	uc002fix.4	0	ENSG00000131149	GSE1	Gse1 coiled-coil protein	TRUE	FALSE	FALSE	FALSE	TRUE	TRUE
20200205_TTNGFP_D4_GATA6ChIP_001_peak_11754	chr16	85653132	85653276	145	*	15.3	+	Intron (uc002fiw.3/23199, intron 1 of 14)	16	85646842	85709812	62971	1	23199	uc002fiy.4	6290	ENSG00000131149	GSE1	Gse1 coiled-coil protein	TRUE	FALSE	FALSE	FALSE	FALSE	FALSE
20200205_TTNGFP_D4_GATA6ChIP_001_peak_11755	chr16	85654453	85654701	249	*	24.4	+	Intron (uc002fiw.3/23199, intron 1 of 14)	16	85646842	85709812	62971	1	23199	uc002fiy.4	7611	ENSG00000131149	GSE1	Gse1 coiled-coil protein	FALSE	FALSE	FALSE	FALSE	FALSE	FALSE
20200205_TTNGFP_D4_GATA6ChIP_001_peak_11756	chr16	85657518	85657697	180	*	22.3	+	Intron (uc002fiw.3/23199, intron 1 of 14)	16	85646842	85709812	62971	1	23199	uc002fiy.4	10676	ENSG00000131149	GSE1	Gse1 coiled-coil protein	FALSE	FALSE	FALSE	FALSE	FALSE	FALSE
20200205_TTNGFP_D4_GATA6ChIP_001_peak_11757	chr16	85666996	85667153	158	*	15.4	+	Intron (uc002fiw.3/23199, intron 1 of 14)	16	85646842	85709812	62971	1	23199	uc002fiy.4	20154	ENSG00000131149	GSE1	Gse1 coiled-coil protein	FALSE	FALSE	FALSE	FALSE	FALSE	FALSE
20200205_TTNGFP_D4_GATA6ChIP_001_peak_11758	chr16	85673732	85673867	136	*	13.5	+	Intron (uc002fiw.3/23199, intron 1 of 14)	16	85695897	85709812	13916	1	23199	uc002fiz.3	-22030	ENSG00000131149	GSE1	Gse1 coiled-coil protein	FALSE	FALSE	FALSE	FALSE	FALSE	FALSE
20200205_TTNGFP_D4_GATA6ChIP_001_peak_1176	chr1	19392821	19393013	193	*	15.1	+	Distal Intergenic	1	19401000	19408140	7141	2	23352	uc001bbf.3	15127	ENSG00000127481	UBR4	ubiquitin protein ligase E3 component n-recognin 4	FALSE	FALSE	FALSE	TRUE	FALSE	FALSE
20200205_TTNGFP_D4_GATA6ChIP_001_peak_11761	chr16	85682203	85682344	142	*	20.3	+	5' UTR	16	85695897	85709812	13916	1	23199	uc002fiz.3	-13553	ENSG00000131149	GSE1	Gse1 coiled-coil protein	FALSE	FALSE	FALSE	FALSE	FALSE	FALSE
20200205_TTNGFP_D4_GATA6ChIP_001_peak_11762	chr16	85683495	85683965	471	*	42.8	+	Intron (uc002fiw.3/23199, intron 2 of 14)	16	85695897	85709812	13916	1	23199	uc002fiz.3	-11932	ENSG00000131149	GSE1	Gse1 coiled-coil protein	FALSE	FALSE	FALSE	FALSE	FALSE	FALSE
20200205_TTNGFP_D4_GATA6ChIP_001_peak_11765	chr16	85692260	85692438	179	*	16.3	+	Promoter (3-4kb)	16	85695897	85709812	13916	1	23199	uc002fiz.3	-3459	ENSG00000131149	GSE1	Gse1 coiled-coil protein	TRUE	FALSE	FALSE	FALSE	FALSE	FALSE
20200205_TTNGFP_D4_GATA6ChIP_001_peak_11766	chr16	85696115	85696325	211	*	21.8	+	Promoter (<=1kb)	16	85695897	85709812	13916	1	23199	uc002fiz.3	218	ENSG00000131149	GSE1	Gse1 coiled-coil protein	FALSE	FALSE	FALSE	FALSE	FALSE	TRUE
20200205_TTNGFP_D4_GATA6ChIP_001_peak_11769	chr16	85720571	85720707	137	*	9.2	+	Promoter (1-2kb)	16	85711280	85722588	11309	2	51659	uc002fja.3	1881	ENSG00000131153	GINS2	GINS complex subunit 2	FALSE	FALSE	FALSE	FALSE	FALSE	FALSE
20200205_TTNGFP_D4_GATA6ChIP_001_peak_1177	chr1	19393304	19393457	154	*	14.4	+	Distal Intergenic	1	19401000	19408140	7141	2	23352	uc001bbf.3	14683	ENSG00000127481	UBR4	ubiquitin protein ligase E3 component n-recognin 4	FALSE	FALSE	FALSE	TRUE	FALSE	FALSE
20200205_TTNGFP_D4_GATA6ChIP_001_peak_11772	chr16	85738403	85738615	213	*	11	+	Downstream (2-3kb)	16	85714731	85722588	7858	2	51659	uc002fjb.2	-15815	ENSG00000131153	GINS2	GINS complex subunit 2	FALSE	FALSE	FALSE	FALSE	FALSE	FALSE
20200205_TTNGFP_D4_GATA6ChIP_001_peak_11773	chr16	85760722	85760937	216	*	20.4	+	Intron (uc002fjc.4/404550, intron 2 of 3)	16	85775227	85775306	80	2	100302261	uc021tme.1	14369	ENSG00000283416	MIR1910	microRNA 1910	FALSE	FALSE	FALSE	FALSE	FALSE	FALSE
20200205_TTNGFP_D4_GATA6ChIP_001_peak_11776	chr16	85858205	85858570	366	*	20.9	+	Distal Intergenic	16	85833173	85840607	7435	1	1327	uc002fjf.3	25032	ENSG00000131143	COX4I1	cytochrome c oxidase subunit 4I1	FALSE	FALSE	FALSE	TRUE	FALSE	FALSE
20200205_TTNGFP_D4_GATA6ChIP_001_peak_11778	chr16	85881900	85882062	163	*	16.2	+	Distal Intergenic	16	85833173	85840607	7435	1	1327	uc002fjf.3	48727	ENSG00000131143	COX4I1	cytochrome c oxidase subunit 4I1	FALSE	FALSE	FALSE	TRUE	FALSE	FALSE
20200205_TTNGFP_D4_GATA6ChIP_001_peak_11779	chr16	85948636	85948788	153	*	11.4	+	Intron (uc002fjh.3/3394, intron 6 of 8)	16	85936318	85943486	7169	1	3394	uc002fji.3	12318	ENSG00000140968	IRF8	interferon regulatory factor 8	FALSE	FALSE	FALSE	FALSE	FALSE	FALSE
20200205_TTNGFP_D4_GATA6ChIP_001_peak_1178	chr1	19397455	19397709	255	*	31.5	+	Distal Intergenic	1	19401000	19408140	7141	2	23352	uc001bbf.3	10431	ENSG00000127481	UBR4	ubiquitin protein ligase E3 component n-recognin 4	FALSE	FALSE	FALSE	TRUE	FALSE	FALSE
20200205_TTNGFP_D4_GATA6ChIP_001_peak_11781	chr16	85952238	85952452	215	*	14.8	+	Exon (uc002fjh.3/3394, exon 7 of 9)	16	85936318	85943486	7169	1	3394	uc002fji.3	15920	ENSG00000140968	IRF8	interferon regulatory factor 8	FALSE	FALSE	FALSE	FALSE	FALSE	FALSE
20200205_TTNGFP_D4_GATA6ChIP_001_peak_11783	chr16	86056008	86056488	481	*	69	+	Distal Intergenic	16	85936318	85943486	7169	1	3394	uc002fji.3	119690	ENSG00000140968	IRF8	interferon regulatory factor 8	TRUE	FALSE	FALSE	FALSE	TRUE	TRUE
20200205_TTNGFP_D4_GATA6ChIP_001_peak_11784	chr16	86077778	86078049	272	*	24.8	+	Distal Intergenic	16	85936318	85943486	7169	1	3394	uc002fji.3	141460	ENSG00000140968	IRF8	interferon regulatory factor 8	FALSE	FALSE	FALSE	FALSE	FALSE	TRUE
20200205_TTNGFP_D4_GATA6ChIP_001_peak_11785	chr16	86078834	86079019	186	*	23.5	+	Distal Intergenic	16	85936318	85943486	7169	1	3394	uc002fji.3	142516	ENSG00000140968	IRF8	interferon regulatory factor 8	TRUE	FALSE	FALSE	FALSE	FALSE	FALSE
20200205_TTNGFP_D4_GATA6ChIP_001_peak_11786	chr16	86079590	86080157	568	*	45.9	+	Distal Intergenic	16	85936318	85943486	7169	1	3394	uc002fji.3	143272	ENSG00000140968	IRF8	interferon regulatory factor 8	TRUE	FALSE	FALSE	FALSE	TRUE	TRUE
20200205_TTNGFP_D4_GATA6ChIP_001_peak_11787	chr16	86082154	86082271	118	*	16.2	+	Distal Intergenic	16	85936318	85943486	7169	1	3394	uc002fji.3	145836	ENSG00000140968	IRF8	interferon regulatory factor 8	FALSE	FALSE	FALSE	FALSE	TRUE	FALSE
20200205_TTNGFP_D4_GATA6ChIP_001_peak_1179	chr1	19536916	19537079	164	*	10.9	+	Promoter (<=1kb)	1	19401000	19536746	135747	2	23352	uc001bbi.3	-170	ENSG00000127481	UBR4	ubiquitin protein ligase E3 component n-recognin 4	FALSE	FALSE	FALSE	TRUE	FALSE	TRUE
20200205_TTNGFP_D4_GATA6ChIP_001_peak_11791	chr16	86151242	86151676	435	*	21	+	Distal Intergenic	16	86320037	86326995	6959	1	146513	uc021tmf.1	-168361	ENSG00000268532	LINC02135	long intergenic non-protein coding RNA 2135	TRUE	FALSE	FALSE	FALSE	FALSE	TRUE
20200205_TTNGFP_D4_GATA6ChIP_001_peak_11792	chr16	86187514	86187719	206	*	16	+	Distal Intergenic	16	86320037	86326995	6959	1	146513	uc021tmf.1	-132318	ENSG00000268532	LINC02135	long intergenic non-protein coding RNA 2135	FALSE	FALSE	FALSE	FALSE	FALSE	FALSE
20200205_TTNGFP_D4_GATA6ChIP_001_peak_11793	chr16	86229712	86230019	308	*	35.7	+	Distal Intergenic	16	86320037	86326995	6959	1	146513	uc021tmf.1	-90018	ENSG00000268532	LINC02135	long intergenic non-protein coding RNA 2135	TRUE	FALSE	FALSE	FALSE	TRUE	TRUE
20200205_TTNGFP_D4_GATA6ChIP_001_peak_11794	chr16	86238757	86238913	157	*	8.3	+	Distal Intergenic	16	86320037	86326995	6959	1	146513	uc021tmf.1	-81124	ENSG00000268532	LINC02135	long intergenic non-protein coding RNA 2135	FALSE	FALSE	FALSE	FALSE	FALSE	FALSE
20200205_TTNGFP_D4_GATA6ChIP_001_peak_11797	chr16	86328727	86328979	253	*	21.9	+	Distal Intergenic	16	86320037	86326995	6959	1	146513	uc021tmf.1	8690	ENSG00000268532	LINC02135	long intergenic non-protein coding RNA 2135	FALSE	FALSE	FALSE	FALSE	FALSE	FALSE
20200205_TTNGFP_D4_GATA6ChIP_001_peak_11798	chr16	86334647	86335185	539	*	109.9	+	Distal Intergenic	16	86320037	86326995	6959	1	146513	uc021tmf.1	14610	ENSG00000268532	LINC02135	long intergenic non-protein coding RNA 2135	TRUE	FALSE	FALSE	FALSE	TRUE	TRUE
20200205_TTNGFP_D4_GATA6ChIP_001_peak_11799	chr16	86351289	86351418	130	*	10.9	+	Distal Intergenic	16	86365456	86371167	5712	2	732275	uc010chq.2	19749	ENSG00000168367	LINC00917	long intergenic non-protein coding RNA 917	TRUE	FALSE	FALSE	FALSE	FALSE	TRUE
20200205_TTNGFP_D4_GATA6ChIP_001_peak_11800	chr16	86376797	86376940	144	*	8.6	+	Promoter (2-3kb)	16	86365456	86379285	13830	2	732275	uc002fjj.2	2345	ENSG00000168367	LINC00917	long intergenic non-protein coding RNA 917	FALSE	FALSE	FALSE	FALSE	FALSE	FALSE
20200205_TTNGFP_D4_GATA6ChIP_001_peak_11802	chr16	86406797	86406952	156	*	17.7	+	Distal Intergenic	16	86365456	86379285	13830	2	732275	uc010chr.2	-27512	ENSG00000168367	LINC00917	long intergenic non-protein coding RNA 917	TRUE	FALSE	FALSE	FALSE	TRUE	FALSE
20200205_TTNGFP_D4_GATA6ChIP_001_peak_11803	chr16	86411339	86411586	248	*	20.3	+	Distal Intergenic	16	86365456	86379285	13830	2	732275	uc010chr.2	-32054	ENSG00000168367	LINC00917	long intergenic non-protein coding RNA 917	FALSE	FALSE	FALSE	FALSE	FALSE	TRUE
20200205_TTNGFP_D4_GATA6ChIP_001_peak_11804	chr16	86412575	86412775	201	*	17.1	+	Distal Intergenic	16	86365456	86379285	13830	2	732275	uc010chr.2	-33290	ENSG00000168367	LINC00917	long intergenic non-protein coding RNA 917	FALSE	FALSE	FALSE	FALSE	FALSE	FALSE
20200205_TTNGFP_D4_GATA6ChIP_001_peak_11807	chr16	86546557	86546713	157	*	19.5	+	Promoter (2-3kb)	16	86544133	86548070	3938	1	2294	uc002fjl.3	2424	ENSG00000103241	FOXF1	forkhead box F1	FALSE	FALSE	TRUE	TRUE	FALSE	FALSE
20200205_TTNGFP_D4_GATA6ChIP_001_peak_11808	chr16	86549024	86549286	263	*	7.6	+	Distal Intergenic	16	86544133	86548070	3938	1	2294	uc002fjl.3	4891	ENSG00000103241	FOXF1	forkhead box F1	TRUE	FALSE	TRUE	TRUE	FALSE	FALSE
20200205_TTNGFP_D4_GATA6ChIP_001_peak_11809	chr16	86552793	86553032	240	*	29.2	+	Distal Intergenic	16	86544133	86548070	3938	1	2294	uc002fjl.3	8660	ENSG00000103241	FOXF1	forkhead box F1	FALSE	FALSE	TRUE	TRUE	FALSE	FALSE
20200205_TTNGFP_D4_GATA6ChIP_001_peak_11811	chr16	86612174	86612392	219	*	16	+	Promoter (<=1kb)	16	86612115	86615304	3190	1	2300	uc002fjr.3	59	ENSG00000176678	FOXL1	forkhead box L1	FALSE	FALSE	FALSE	FALSE	FALSE	FALSE
20200205_TTNGFP_D4_GATA6ChIP_001_peak_11813	chr16	86734273	86734450	178	*	13.2	+	Distal Intergenic	16	86612115	86615304	3190	1	2300	uc002fjr.3	122158	ENSG00000176678	FOXL1	forkhead box L1	FALSE	FALSE	FALSE	FALSE	FALSE	FALSE
20200205_TTNGFP_D4_GATA6ChIP_001_peak_11814	chr16	86737494	86737683	190	*	10.6	+	Distal Intergenic	16	86612115	86615304	3190	1	2300	uc002fjr.3	125379	ENSG00000176678	FOXL1	forkhead box L1	TRUE	FALSE	FALSE	FALSE	FALSE	FALSE
20200205_TTNGFP_D4_GATA6ChIP_001_peak_11815	chr16	86743892	86744034	143	*	17	+	Distal Intergenic	16	86612115	86615304	3190	1	2300	uc002fjr.3	131777	ENSG00000176678	FOXL1	forkhead box L1	FALSE	FALSE	FALSE	FALSE	FALSE	FALSE
20200205_TTNGFP_D4_GATA6ChIP_001_peak_11816	chr16	86746882	86747236	355	*	21.9	+	Distal Intergenic	16	86612115	86615304	3190	1	2300	uc002fjr.3	134767	ENSG00000176678	FOXL1	forkhead box L1	FALSE	FALSE	FALSE	FALSE	FALSE	FALSE
20200205_TTNGFP_D4_GATA6ChIP_001_peak_11818	chr16	86794531	86795023	493	*	51.9	+	Distal Intergenic	16	86612115	86615304	3190	1	2300	uc002fjr.3	182416	ENSG00000176678	FOXL1	forkhead box L1	TRUE	FALSE	FALSE	FALSE	TRUE	TRUE
20200205_TTNGFP_D4_GATA6ChIP_001_peak_11819	chr16	86795303	86795449	147	*	18.9	+	Distal Intergenic	16	86612115	86615304	3190	1	2300	uc002fjr.3	183188	ENSG00000176678	FOXL1	forkhead box L1	FALSE	FALSE	FALSE	FALSE	TRUE	FALSE
20200205_TTNGFP_D4_GATA6ChIP_001_peak_11822	chr16	86840683	86841049	367	*	33.8	+	Distal Intergenic	16	86612115	86615304	3190	1	2300	uc002fjr.3	228568	ENSG00000176678	FOXL1	forkhead box L1	FALSE	FALSE	FALSE	FALSE	TRUE	TRUE
20200205_TTNGFP_D4_GATA6ChIP_001_peak_11823	chr16	86842722	86842904	183	*	21.8	+	Distal Intergenic	16	86612115	86615304	3190	1	2300	uc002fjr.3	230607	ENSG00000176678	FOXL1	forkhead box L1	FALSE	FALSE	FALSE	FALSE	FALSE	FALSE
20200205_TTNGFP_D4_GATA6ChIP_001_peak_11825	chr16	86880134	86880377	244	*	18.6	+	Distal Intergenic	16	86612115	86615304	3190	1	2300	uc002fjr.3	268019	ENSG00000176678	FOXL1	forkhead box L1	TRUE	FALSE	FALSE	FALSE	FALSE	FALSE
20200205_TTNGFP_D4_GATA6ChIP_001_peak_11827	chr16	86959737	86960081	345	*	27.5	+	Distal Intergenic	16	86612115	86615304	3190	1	2300	uc002fjr.3	347622	ENSG00000176678	FOXL1	forkhead box L1	FALSE	FALSE	FALSE	FALSE	FALSE	FALSE
20200205_TTNGFP_D4_GATA6ChIP_001_peak_11828	chr16	86962619	86963487	869	*	64.3	+	Distal Intergenic	16	86612115	86615304	3190	1	2300	uc002fjr.3	350504	ENSG00000176678	FOXL1	forkhead box L1	TRUE	FALSE	FALSE	FALSE	FALSE	TRUE
20200205_TTNGFP_D4_GATA6ChIP_001_peak_11829	chr16	86981078	86981198	121	*	17.9	+	Distal Intergenic	16	86612115	86615304	3190	1	2300	uc002fjr.3	368963	ENSG00000176678	FOXL1	forkhead box L1	FALSE	FALSE	FALSE	FALSE	FALSE	FALSE
20200205_TTNGFP_D4_GATA6ChIP_001_peak_11830	chr16	86996896	86997017	122	*	17.1	+	Distal Intergenic	16	87336404	87351026	14623	2	100506581	uc002fju.3	354009	ENSG00000260456	C16orf95	chromosome 16 open reading frame 95	FALSE	FALSE	FALSE	FALSE	FALSE	FALSE
20200205_TTNGFP_D4_GATA6ChIP_001_peak_11831	chr16	86998572	86998718	147	*	18.5	+	Distal Intergenic	16	87336404	87351026	14623	2	100506581	uc002fju.3	352308	ENSG00000260456	C16orf95	chromosome 16 open reading frame 95	TRUE	FALSE	FALSE	FALSE	FALSE	FALSE
20200205_TTNGFP_D4_GATA6ChIP_001_peak_11832	chr16	87010795	87011043	249	*	16.3	+	Distal Intergenic	16	87336404	87351026	14623	2	100506581	uc002fju.3	339983	ENSG00000260456	C16orf95	chromosome 16 open reading frame 95	FALSE	FALSE	FALSE	FALSE	FALSE	FALSE
20200205_TTNGFP_D4_GATA6ChIP_001_peak_11833	chr16	87018956	87019149	194	*	13	+	Distal Intergenic	16	87336404	87351026	14623	2	100506581	uc002fju.3	331877	ENSG00000260456	C16orf95	chromosome 16 open reading frame 95	TRUE	FALSE	FALSE	FALSE	TRUE	FALSE
20200205_TTNGFP_D4_GATA6ChIP_001_peak_11834	chr16	87022638	87022802	165	*	9.7	+	Distal Intergenic	16	87336404	87351026	14623	2	100506581	uc002fju.3	328224	ENSG00000260456	C16orf95	chromosome 16 open reading frame 95	FALSE	FALSE	FALSE	FALSE	FALSE	FALSE
20200205_TTNGFP_D4_GATA6ChIP_001_peak_11835	chr16	87030647	87030890	244	*	26.3	+	Distal Intergenic	16	87336404	87351026	14623	2	100506581	uc002fju.3	320136	ENSG00000260456	C16orf95	chromosome 16 open reading frame 95	TRUE	FALSE	FALSE	FALSE	FALSE	FALSE
20200205_TTNGFP_D4_GATA6ChIP_001_peak_11836	chr16	87052036	87052244	209	*	18	+	Distal Intergenic	16	87336404	87351026	14623	2	100506581	uc002fju.3	298782	ENSG00000260456	C16orf95	chromosome 16 open reading frame 95	FALSE	FALSE	FALSE	FALSE	FALSE	FALSE
20200205_TTNGFP_D4_GATA6ChIP_001_peak_11837	chr16	87076401	87076607	207	*	14.8	+	Distal Intergenic	16	87336404	87351026	14623	2	100506581	uc002fju.3	274419	ENSG00000260456	C16orf95	chromosome 16 open reading frame 95	FALSE	FALSE	FALSE	FALSE	FALSE	FALSE
20200205_TTNGFP_D4_GATA6ChIP_001_peak_11838	chr16	87086820	87087330	511	*	70.8	+	Distal Intergenic	16	87336404	87351026	14623	2	100506581	uc002fju.3	263696	ENSG00000260456	C16orf95	chromosome 16 open reading frame 95	TRUE	FALSE	FALSE	FALSE	TRUE	FALSE
20200205_TTNGFP_D4_GATA6ChIP_001_peak_1184	chr1	19719394	19719702	309	*	26.3	+	Intron (uc010ocz.2/832, intron 2 of 8)	1	19638740	19658922	20183	1	54896	uc021ohq.1	80654	ENSG00000040487	PQLC2	PQ loop repeat containing 2	FALSE	FALSE	FALSE	FALSE	FALSE	FALSE
20200205_TTNGFP_D4_GATA6ChIP_001_peak_11841	chr16	87177557	87177757	201	*	21.2	+	Intron (uc002fjt.1/uc002fjt.1, intron 1 of 4)	16	87336404	87351026	14623	2	100506581	uc002fju.3	173269	ENSG00000260456	C16orf95	chromosome 16 open reading frame 95	FALSE	FALSE	FALSE	FALSE	FALSE	FALSE
20200205_TTNGFP_D4_GATA6ChIP_001_peak_11842	chr16	87208483	87208647	165	*	14.2	+	Intron (uc002fjt.1/uc002fjt.1, intron 1 of 4)	16	87336404	87351026	14623	2	100506581	uc002fju.3	142379	ENSG00000260456	C16orf95	chromosome 16 open reading frame 95	FALSE	FALSE	FALSE	FALSE	FALSE	FALSE
20200205_TTNGFP_D4_GATA6ChIP_001_peak_11844	chr16	87330175	87330367	193	*	14.4	+	Intron (uc002fjt.1/uc002fjt.1, intron 1 of 4)	16	87336404	87351026	14623	2	100506581	uc002fju.3	20659	ENSG00000260456	C16orf95	chromosome 16 open reading frame 95	FALSE	FALSE	FALSE	FALSE	FALSE	FALSE
20200205_TTNGFP_D4_GATA6ChIP_001_peak_11845	chr16	87337749	87337965	217	*	18.2	+	Intron (uc002fju.3/100506581, intron 4 of 4)	16	87336404	87351026	14623	2	100506581	uc002fju.3	13061	ENSG00000260456	C16orf95	chromosome 16 open reading frame 95	FALSE	FALSE	FALSE	FALSE	FALSE	FALSE
20200205_TTNGFP_D4_GATA6ChIP_001_peak_11846	chr16	87344440	87344582	143	*	13.3	+	Intron (uc002fju.3/100506581, intron 3 of 4)	16	87336404	87351026	14623	2	100506581	uc002fju.3	6444	ENSG00000260456	C16orf95	chromosome 16 open reading frame 95	FALSE	FALSE	FALSE	FALSE	FALSE	TRUE
20200205_TTNGFP_D4_GATA6ChIP_001_peak_11847	chr16	87354188	87354307	120	*	7.9	+	Promoter (3-4kb)	16	87336404	87351026	14623	2	100506581	uc031qxd.1	-3162	ENSG00000260456	C16orf95	chromosome 16 open reading frame 95	FALSE	FALSE	FALSE	FALSE	FALSE	FALSE
20200205_TTNGFP_D4_GATA6ChIP_001_peak_11848	chr16	87356605	87356838	234	*	28.8	+	Promoter (5-6kb)	16	87336404	87351026	14623	2	100506581	uc031qxd.1	-5579	ENSG00000260456	C16orf95	chromosome 16 open reading frame 95	FALSE	FALSE	FALSE	FALSE	FALSE	FALSE
20200205_TTNGFP_D4_GATA6ChIP_001_peak_11849	chr16	87367313	87367600	288	*	21.8	+	Exon (uc002fjv.3/79791, exon 7 of 8)	16	87336404	87351026	14623	2	100506581	uc031qxd.1	-16287	ENSG00000260456	C16orf95	chromosome 16 open reading frame 95	FALSE	FALSE	FALSE	FALSE	FALSE	FALSE
20200205_TTNGFP_D4_GATA6ChIP_001_peak_1185	chr1	19967360	19967537	178	*	9.7	+	Promoter (2-3kb)	1	19969723	19984949	15227	1	4681	uc001bcj.2	-2186	ENSG00000158747	NBL1	NBL1, DAN family BMP antagonist	FALSE	FALSE	FALSE	FALSE	FALSE	FALSE
20200205_TTNGFP_D4_GATA6ChIP_001_peak_11850	chr16	87368164	87368316	153	*	15.1	+	Intron (uc002fjv.3/79791, intron 6 of 7)	16	87336404	87351026	14623	2	100506581	uc031qxd.1	-17138	ENSG00000260456	C16orf95	chromosome 16 open reading frame 95	FALSE	FALSE	FALSE	FALSE	FALSE	FALSE
20200205_TTNGFP_D4_GATA6ChIP_001_peak_11851	chr16	87369612	87369868	257	*	29.4	+	Exon (uc002fjv.3/79791, exon 5 of 8)	16	87336404	87351026	14623	2	100506581	uc031qxd.1	-18586	ENSG00000260456	C16orf95	chromosome 16 open reading frame 95	FALSE	FALSE	FALSE	FALSE	FALSE	FALSE
20200205_TTNGFP_D4_GATA6ChIP_001_peak_11853	chr16	87379618	87379796	179	*	17.4	+	Intron (uc002fjv.3/79791, intron 2 of 7)	16	87362942	87394561	31620	2	79791	uc002fjv.3	14765	ENSG00000103264	FBXO31	F-box protein 31	FALSE	FALSE	FALSE	FALSE	FALSE	FALSE
20200205_TTNGFP_D4_GATA6ChIP_001_peak_11855	chr16	87445057	87445173	117	*	13.6	+	Exon (uc002fjz.1/23174, exon 12 of 13)	16	87445022	87457487	12466	2	23174	uc002fkb.3	12314	ENSG00000140948	ZCCHC14	zinc finger CCHC-type containing 14	FALSE	FALSE	FALSE	TRUE	FALSE	FALSE
20200205_TTNGFP_D4_GATA6ChIP_001_peak_11856	chr16	87465969	87466105	137	*	10.4	+	Promoter (8-9kb)	16	87445022	87457487	12466	2	23174	uc002fkb.3	-8482	ENSG00000140948	ZCCHC14	zinc finger CCHC-type containing 14	FALSE	FALSE	FALSE	TRUE	FALSE	FALSE
20200205_TTNGFP_D4_GATA6ChIP_001_peak_11857	chr16	87482489	87482765	277	*	17.7	+	Intron (uc002fjz.1/23174, intron 2 of 12)	16	87445022	87457487	12466	2	23174	uc002fkb.3	-25002	ENSG00000140948	ZCCHC14	zinc finger CCHC-type containing 14	FALSE	FALSE	FALSE	TRUE	FALSE	FALSE
20200205_TTNGFP_D4_GATA6ChIP_001_peak_11858	chr16	87492213	87492458	246	*	22.4	+	Intron (uc002fjz.1/23174, intron 2 of 12)	16	87439852	87525460	85609	2	23174	uc002fjz.1	33002	ENSG00000140948	ZCCHC14	zinc finger CCHC-type containing 14	FALSE	FALSE	FALSE	TRUE	FALSE	FALSE
20200205_TTNGFP_D4_GATA6ChIP_001_peak_11859	chr16	87498677	87498831	155	*	11.8	+	Intron (uc002fjz.1/23174, intron 1 of 12)	16	87439852	87525460	85609	2	23174	uc002fjz.1	26629	ENSG00000140948	ZCCHC14	zinc finger CCHC-type containing 14	FALSE	FALSE	FALSE	TRUE	FALSE	FALSE
20200205_TTNGFP_D4_GATA6ChIP_001_peak_1186	chr1	19980593	19980775	183	*	13.2	+	Intron (uc009vpl.2/100532736, intron 1 of 3)	1	19974104	19984949	10846	1	4681	uc031pll.1	6489	ENSG00000158747	NBL1	NBL1, DAN family BMP antagonist	FALSE	FALSE	FALSE	FALSE	FALSE	FALSE
20200205_TTNGFP_D4_GATA6ChIP_001_peak_11861	chr16	87524504	87524811	308	*	19.5	+	Promoter (<=1kb)	16	87439852	87525460	85609	2	23174	uc002fjz.1	649	ENSG00000140948	ZCCHC14	zinc finger CCHC-type containing 14	TRUE	FALSE	FALSE	TRUE	FALSE	FALSE
20200205_TTNGFP_D4_GATA6ChIP_001_peak_11863	chr16	87594267	87594407	141	*	13.9	+	Distal Intergenic	16	87635441	87731761	96321	1	57338	uc010vou.2	-41034	ENSG00000154118	JPH3	junctophilin 3	FALSE	FALSE	FALSE	FALSE	FALSE	FALSE
20200205_TTNGFP_D4_GATA6ChIP_001_peak_11865	chr16	87619345	87619753	409	*	38	+	Distal Intergenic	16	87635441	87731761	96321	1	57338	uc010vou.2	-15688	ENSG00000154118	JPH3	junctophilin 3	FALSE	FALSE	FALSE	FALSE	FALSE	FALSE
20200205_TTNGFP_D4_GATA6ChIP_001_peak_11868	chr16	87658169	87658373	205	*	12.6	+	Intron (uc010vou.2/57338, intron 1 of 5)	16	87636493	87731761	95269	1	57338	uc002fkd.4	21676	ENSG00000154118	JPH3	junctophilin 3	FALSE	FALSE	FALSE	FALSE	FALSE	FALSE
20200205_TTNGFP_D4_GATA6ChIP_001_peak_11870	chr16	87662507	87662664	158	*	12.6	+	Intron (uc010vou.2/57338, intron 1 of 5)	16	87636493	87731761	95269	1	57338	uc002fkd.4	26014	ENSG00000154118	JPH3	junctophilin 3	FALSE	FALSE	FALSE	FALSE	FALSE	FALSE
20200205_TTNGFP_D4_GATA6ChIP_001_peak_11871	chr16	87674858	87675051	194	*	18.3	+	Intron (uc010vou.2/57338, intron 1 of 5)	16	87636493	87731761	95269	1	57338	uc002fkd.4	38365	ENSG00000154118	JPH3	junctophilin 3	FALSE	FALSE	FALSE	FALSE	FALSE	FALSE
20200205_TTNGFP_D4_GATA6ChIP_001_peak_11872	chr16	87681440	87681638	199	*	14.4	+	Intron (uc010vou.2/57338, intron 2 of 5)	16	87636493	87731761	95269	1	57338	uc002fkd.4	44947	ENSG00000154118	JPH3	junctophilin 3	FALSE	FALSE	FALSE	FALSE	FALSE	FALSE
20200205_TTNGFP_D4_GATA6ChIP_001_peak_11873	chr16	87682339	87682770	432	*	28.2	+	Intron (uc010vou.2/57338, intron 2 of 5)	16	87636493	87731761	95269	1	57338	uc002fkd.4	45846	ENSG00000154118	JPH3	junctophilin 3	FALSE	FALSE	FALSE	FALSE	FALSE	FALSE
20200205_TTNGFP_D4_GATA6ChIP_001_peak_11874	chr16	87700518	87700779	262	*	25.6	+	Intron (uc010vou.2/57338, intron 2 of 5)	16	87736729	87743273	6545	2	54758	uc002fkh.1	42494	ENSG00000104731	KLHDC4	kelch domain containing 4	TRUE	FALSE	FALSE	FALSE	FALSE	FALSE
20200205_TTNGFP_D4_GATA6ChIP_001_peak_11875	chr16	87704056	87704174	119	*	14.8	+	Intron (uc010vou.2/57338, intron 2 of 5)	16	87736729	87743273	6545	2	54758	uc002fkh.1	39099	ENSG00000104731	KLHDC4	kelch domain containing 4	FALSE	FALSE	FALSE	FALSE	FALSE	FALSE
20200205_TTNGFP_D4_GATA6ChIP_001_peak_11876	chr16	87708966	87709108	143	*	14.4	+	Intron (uc010vou.2/57338, intron 2 of 5)	16	87736729	87743273	6545	2	54758	uc002fkh.1	34165	ENSG00000104731	KLHDC4	kelch domain containing 4	FALSE	FALSE	FALSE	FALSE	FALSE	FALSE
20200205_TTNGFP_D4_GATA6ChIP_001_peak_1188	chr1	20005213	20005712	500	*	29.5	+	Exon (uc001bcl.3/3362, exon 2 of 3)	1	19991780	20006055	14276	1	3362	uc001bcl.3	13433	ENSG00000158748	HTR6	5-hydroxytryptamine receptor 6	FALSE	FALSE	FALSE	FALSE	FALSE	FALSE
20200205_TTNGFP_D4_GATA6ChIP_001_peak_11881	chr16	87862278	87862434	157	*	14.5	+	Downstream (1-2kb)	16	87863629	87903100	39472	2	8140	uc002fkm.3	40666	ENSG00000103257	SLC7A5	solute carrier family 7 member 5	FALSE	FALSE	FALSE	FALSE	FALSE	FALSE
20200205_TTNGFP_D4_GATA6ChIP_001_peak_11884	chr16	87869771	87869960	190	*	19.5	+	Intron (uc002fkm.3/8140, intron 8 of 9)	16	87863629	87903100	39472	2	8140	uc002fkm.3	33140	ENSG00000103257	SLC7A5	solute carrier family 7 member 5	TRUE	FALSE	FALSE	FALSE	FALSE	FALSE
20200205_TTNGFP_D4_GATA6ChIP_001_peak_11885	chr16	87880556	87880940	385	*	32.1	+	Intron (uc002fkm.3/8140, intron 2 of 9)	16	87863629	87903100	39472	2	8140	uc002fkm.3	22160	ENSG00000103257	SLC7A5	solute carrier family 7 member 5	FALSE	FALSE	FALSE	FALSE	FALSE	FALSE
20200205_TTNGFP_D4_GATA6ChIP_001_peak_11886	chr16	87885139	87885345	207	*	19.4	+	Exon (uc002fkm.3/8140, exon 2 of 10)	16	87863629	87903100	39472	2	8140	uc002fkm.3	17755	ENSG00000103257	SLC7A5	solute carrier family 7 member 5	FALSE	FALSE	FALSE	FALSE	FALSE	FALSE
20200205_TTNGFP_D4_GATA6ChIP_001_peak_11888	chr16	87889823	87890038	216	*	22.3	+	Intron (uc002fkm.3/8140, intron 1 of 9)	16	87863629	87903100	39472	2	8140	uc002fkm.3	13062	ENSG00000103257	SLC7A5	solute carrier family 7 member 5	FALSE	FALSE	FALSE	FALSE	FALSE	FALSE
20200205_TTNGFP_D4_GATA6ChIP_001_peak_11889	chr16	87894525	87894865	341	*	29.7	+	Intron (uc002fkm.3/8140, intron 1 of 9)	16	87863629	87903100	39472	2	8140	uc002fkm.3	8235	ENSG00000103257	SLC7A5	solute carrier family 7 member 5	FALSE	FALSE	FALSE	FALSE	FALSE	FALSE
20200205_TTNGFP_D4_GATA6ChIP_001_peak_11890	chr16	87904069	87904613	545	*	61.9	+	Promoter (<=1kb)	16	87863629	87903100	39472	2	8140	uc002fkm.3	-969	ENSG00000103257	SLC7A5	solute carrier family 7 member 5	TRUE	FALSE	FALSE	FALSE	TRUE	TRUE
20200205_TTNGFP_D4_GATA6ChIP_001_peak_11891	chr16	87939977	87940097	121	*	15.4	+	Intron (uc002fkn.1/763, intron 2 of 6)	16	87921625	87970112	48488	2	763	uc002fkn.1	30015	ENSG00000174990	CA5A	carbonic anhydrase 5A	FALSE	FALSE	FALSE	FALSE	FALSE	FALSE
20200205_TTNGFP_D4_GATA6ChIP_001_peak_11894	chr16	87984105	87984337	233	*	21.5	+	Promoter (<=1kb)	16	87984238	88066851	82614	1	54971	uc002fko.1	0	ENSG00000172530	BANP	BTG3 associated nuclear protein	TRUE	FALSE	FALSE	FALSE	FALSE	FALSE
20200205_TTNGFP_D4_GATA6ChIP_001_peak_11895	chr16	88029641	88029779	139	*	20.7	+	Intron (uc002fko.1/54971, intron 3 of 7)	16	88003624	88110924	107301	1	54971	uc002fkr.3	26017	ENSG00000172530	BANP	BTG3 associated nuclear protein	FALSE	FALSE	FALSE	FALSE	FALSE	FALSE
20200205_TTNGFP_D4_GATA6ChIP_001_peak_11896	chr16	88053946	88054314	369	*	25.9	+	Intron (uc002fko.1/54971, intron 6 of 7)	16	88003624	88110924	107301	1	54971	uc002fkr.3	50322	ENSG00000172530	BANP	BTG3 associated nuclear protein	FALSE	FALSE	FALSE	FALSE	FALSE	FALSE
20200205_TTNGFP_D4_GATA6ChIP_001_peak_11897	chr16	88059721	88059881	161	*	15.6	+	Intron (uc002fko.1/54971, intron 6 of 7)	16	88003624	88110924	107301	1	54971	uc002fkr.3	56097	ENSG00000172530	BANP	BTG3 associated nuclear protein	FALSE	FALSE	FALSE	FALSE	FALSE	FALSE
20200205_TTNGFP_D4_GATA6ChIP_001_peak_11899	chr16	88093770	88093924	155	*	14.5	+	Intron (uc002fkp.3/54971, intron 10 of 12)	16	88003624	88110924	107301	1	54971	uc002fkr.3	90146	ENSG00000172530	BANP	BTG3 associated nuclear protein	FALSE	FALSE	FALSE	FALSE	FALSE	FALSE
20200205_TTNGFP_D4_GATA6ChIP_001_peak_119	chr1	1469573	1469747	175	*	7.9	+	3' UTR	1	1470158	1475740	5583	2	339453	uc009vkf.3	5993	ENSG00000205090	TMEM240	transmembrane protein 240	FALSE	FALSE	FALSE	FALSE	FALSE	FALSE
20200205_TTNGFP_D4_GATA6ChIP_001_peak_1190	chr1	20476243	20476359	117	*	13.9	+	3' UTR	1	20465823	20476879	11057	1	64600	uc009vpp.1	10420	ENSG00000158786	PLA2G2F	phospholipase A2 group IIF	FALSE	FALSE	FALSE	FALSE	FALSE	FALSE
20200205_TTNGFP_D4_GATA6ChIP_001_peak_11906	chr16	88123141	88123494	354	*	17.3	+	3' UTR	16	88003624	88110924	107301	1	54971	uc002fkr.3	119517	ENSG00000172530	BANP	BTG3 associated nuclear protein	FALSE	FALSE	FALSE	FALSE	FALSE	FALSE
20200205_TTNGFP_D4_GATA6ChIP_001_peak_11909	chr16	88136312	88136486	175	*	18.2	+	Distal Intergenic	16	88003624	88110924	107301	1	54971	uc002fkr.3	132688	ENSG00000172530	BANP	BTG3 associated nuclear protein	FALSE	FALSE	FALSE	FALSE	FALSE	FALSE
20200205_TTNGFP_D4_GATA6ChIP_001_peak_1191	chr1	20616962	20617503	542	*	68.4	+	Promoter (<=1kb)	1	20617412	20665715	48304	1	127731	uc001bdd.2	0	ENSG00000158816	VWA5B1	von Willebrand factor A domain containing 5B1	TRUE	FALSE	TRUE	TRUE	TRUE	TRUE
20200205_TTNGFP_D4_GATA6ChIP_001_peak_11911	chr16	88153358	88153502	145	*	13.8	+	Distal Intergenic	16	88003624	88110924	107301	1	54971	uc002fkr.3	149734	ENSG00000172530	BANP	BTG3 associated nuclear protein	TRUE	FALSE	FALSE	FALSE	FALSE	FALSE
20200205_TTNGFP_D4_GATA6ChIP_001_peak_11912	chr16	88168652	88168809	158	*	18.9	+	Distal Intergenic	16	88003624	88110924	107301	1	54971	uc002fkr.3	165028	ENSG00000172530	BANP	BTG3 associated nuclear protein	FALSE	FALSE	FALSE	FALSE	FALSE	FALSE
20200205_TTNGFP_D4_GATA6ChIP_001_peak_11916	chr16	88177722	88178034	313	*	32.2	+	Distal Intergenic	16	88003624	88110924	107301	1	54971	uc002fkr.3	174098	ENSG00000172530	BANP	BTG3 associated nuclear protein	TRUE	FALSE	FALSE	FALSE	TRUE	TRUE
20200205_TTNGFP_D4_GATA6ChIP_001_peak_11917	chr16	88186756	88186931	176	*	16.5	+	Distal Intergenic	16	88003624	88110924	107301	1	54971	uc002fkr.3	183132	ENSG00000172530	BANP	BTG3 associated nuclear protein	FALSE	FALSE	FALSE	FALSE	FALSE	FALSE
20200205_TTNGFP_D4_GATA6ChIP_001_peak_1192	chr1	20634805	20635492	688	*	129.1	+	Intron (uc001bdd.2/127731, intron 1 of 14)	1	20617412	20681387	63976	1	127731	uc010odc.1	17393	ENSG00000158816	VWA5B1	von Willebrand factor A domain containing 5B1	TRUE	FALSE	TRUE	TRUE	TRUE	TRUE
20200205_TTNGFP_D4_GATA6ChIP_001_peak_11921	chr16	88218225	88218444	220	*	22.4	+	Distal Intergenic	16	88003624	88110924	107301	1	54971	uc002fkr.3	214601	ENSG00000172530	BANP	BTG3 associated nuclear protein	TRUE	FALSE	FALSE	FALSE	FALSE	FALSE
20200205_TTNGFP_D4_GATA6ChIP_001_peak_11924	chr16	88254731	88254862	132	*	16.7	+	Distal Intergenic	16	88493879	88507165	13287	1	84627	uc002fku.2	-239017	ENSG00000225614	ZNF469	zinc finger protein 469	FALSE	FALSE	FALSE	FALSE	FALSE	FALSE
20200205_TTNGFP_D4_GATA6ChIP_001_peak_11928	chr16	88315929	88316201	273	*	31	+	Distal Intergenic	16	88493879	88507165	13287	1	84627	uc002fku.2	-177678	ENSG00000225614	ZNF469	zinc finger protein 469	FALSE	FALSE	FALSE	FALSE	FALSE	TRUE
20200205_TTNGFP_D4_GATA6ChIP_001_peak_11929	chr16	88319137	88319335	199	*	16.5	+	Distal Intergenic	16	88493879	88507165	13287	1	84627	uc002fku.2	-174544	ENSG00000225614	ZNF469	zinc finger protein 469	FALSE	FALSE	FALSE	FALSE	FALSE	FALSE
20200205_TTNGFP_D4_GATA6ChIP_001_peak_11931	chr16	88333496	88333698	203	*	20.7	+	Distal Intergenic	16	88493879	88507165	13287	1	84627	uc002fku.2	-160181	ENSG00000225614	ZNF469	zinc finger protein 469	FALSE	FALSE	FALSE	FALSE	FALSE	FALSE
20200205_TTNGFP_D4_GATA6ChIP_001_peak_11932	chr16	88336541	88336687	147	*	28.2	+	Distal Intergenic	16	88493879	88507165	13287	1	84627	uc002fku.2	-157192	ENSG00000225614	ZNF469	zinc finger protein 469	FALSE	FALSE	FALSE	FALSE	FALSE	FALSE
20200205_TTNGFP_D4_GATA6ChIP_001_peak_11933	chr16	88337755	88338020	266	*	39.2	+	Distal Intergenic	16	88493879	88507165	13287	1	84627	uc002fku.2	-155859	ENSG00000225614	ZNF469	zinc finger protein 469	TRUE	FALSE	FALSE	FALSE	FALSE	TRUE
20200205_TTNGFP_D4_GATA6ChIP_001_peak_11938	chr16	88352895	88353141	247	*	20.1	+	Distal Intergenic	16	88493879	88507165	13287	1	84627	uc002fku.2	-140738	ENSG00000225614	ZNF469	zinc finger protein 469	FALSE	FALSE	FALSE	FALSE	FALSE	FALSE
20200205_TTNGFP_D4_GATA6ChIP_001_peak_11939	chr16	88355950	88356108	159	*	18.3	+	Distal Intergenic	16	88493879	88507165	13287	1	84627	uc002fku.2	-137771	ENSG00000225614	ZNF469	zinc finger protein 469	FALSE	FALSE	FALSE	FALSE	FALSE	FALSE
20200205_TTNGFP_D4_GATA6ChIP_001_peak_1194	chr1	20728080	20728201	122	*	13	+	Intron (uc009vpu.2/339505, intron 1 of 3)	1	20686294	20732187	45894	2	339505	uc009vpu.2	3986	NA	LINC01141	long intergenic non-protein coding RNA 1141	FALSE	FALSE	FALSE	FALSE	FALSE	FALSE
20200205_TTNGFP_D4_GATA6ChIP_001_peak_11941	chr16	88368533	88368763	231	*	27.1	+	Distal Intergenic	16	88493879	88507165	13287	1	84627	uc002fku.2	-125116	ENSG00000225614	ZNF469	zinc finger protein 469	FALSE	FALSE	FALSE	FALSE	FALSE	FALSE
20200205_TTNGFP_D4_GATA6ChIP_001_peak_11942	chr16	88376229	88376589	361	*	25.6	+	Distal Intergenic	16	88493879	88507165	13287	1	84627	uc002fku.2	-117290	ENSG00000225614	ZNF469	zinc finger protein 469	FALSE	FALSE	FALSE	FALSE	FALSE	FALSE
20200205_TTNGFP_D4_GATA6ChIP_001_peak_11943	chr16	88379157	88379290	134	*	15	+	Distal Intergenic	16	88493879	88507165	13287	1	84627	uc002fku.2	-114589	ENSG00000225614	ZNF469	zinc finger protein 469	FALSE	FALSE	FALSE	FALSE	FALSE	FALSE
20200205_TTNGFP_D4_GATA6ChIP_001_peak_11945	chr16	88453383	88453588	206	*	19.7	+	Distal Intergenic	16	88493879	88507165	13287	1	84627	uc002fku.2	-40291	ENSG00000225614	ZNF469	zinc finger protein 469	FALSE	FALSE	FALSE	FALSE	FALSE	FALSE
20200205_TTNGFP_D4_GATA6ChIP_001_peak_11947	chr16	88470929	88471054	126	*	20.7	+	Distal Intergenic	16	88493879	88507165	13287	1	84627	uc002fku.2	-22825	ENSG00000225614	ZNF469	zinc finger protein 469	FALSE	FALSE	FALSE	FALSE	FALSE	FALSE
20200205_TTNGFP_D4_GATA6ChIP_001_peak_11948	chr16	88472993	88473141	149	*	15.6	+	Distal Intergenic	16	88493879	88507165	13287	1	84627	uc002fku.2	-20738	ENSG00000225614	ZNF469	zinc finger protein 469	FALSE	FALSE	FALSE	FALSE	FALSE	FALSE
20200205_TTNGFP_D4_GATA6ChIP_001_peak_11949	chr16	88473654	88473789	136	*	20.9	+	Distal Intergenic	16	88493879	88507165	13287	1	84627	uc002fku.2	-20090	ENSG00000225614	ZNF469	zinc finger protein 469	FALSE	FALSE	FALSE	FALSE	FALSE	FALSE
20200205_TTNGFP_D4_GATA6ChIP_001_peak_1195	chr1	20744198	20744356	159	*	26.2	+	Intron (uc001bdf.2/339505, intron 1 of 11)	1	20686294	20755287	68994	2	339505	uc001bdf.2	10931	NA	LINC01141	long intergenic non-protein coding RNA 1141	FALSE	FALSE	FALSE	FALSE	FALSE	FALSE
20200205_TTNGFP_D4_GATA6ChIP_001_peak_11954	chr16	88492667	88492881	215	*	21.2	+	Promoter (<=1kb)	16	88493879	88507165	13287	1	84627	uc002fku.2	-998	ENSG00000225614	ZNF469	zinc finger protein 469	FALSE	FALSE	FALSE	FALSE	FALSE	FALSE
20200205_TTNGFP_D4_GATA6ChIP_001_peak_11958	chr16	88506378	88506497	120	*	10.6	+	3' UTR	16	88493879	88507165	13287	1	84627	uc002fku.2	12499	ENSG00000225614	ZNF469	zinc finger protein 469	FALSE	FALSE	FALSE	FALSE	FALSE	FALSE
20200205_TTNGFP_D4_GATA6ChIP_001_peak_11959	chr16	88506833	88506962	130	*	14.5	+	3' UTR	16	88493879	88507165	13287	1	84627	uc002fku.2	12954	ENSG00000225614	ZNF469	zinc finger protein 469	FALSE	FALSE	FALSE	FALSE	FALSE	FALSE
20200205_TTNGFP_D4_GATA6ChIP_001_peak_11962	chr16	88520222	88520374	153	*	13.8	+	Promoter (<=1kb)	16	88520014	88601574	81561	1	161882	uc002fkv.3	208	ENSG00000179588	ZFPM1	zinc finger protein, FOG family member 1	TRUE	TRUE	TRUE	FALSE	FALSE	FALSE
20200205_TTNGFP_D4_GATA6ChIP_001_peak_11963	chr16	88521074	88521500	427	*	30.3	+	Promoter (1-2kb)	16	88520014	88601574	81561	1	161882	uc002fkv.3	1060	ENSG00000179588	ZFPM1	zinc finger protein, FOG family member 1	FALSE	TRUE	TRUE	FALSE	FALSE	FALSE
20200205_TTNGFP_D4_GATA6ChIP_001_peak_11964	chr16	88521681	88521874	194	*	17	+	Promoter (1-2kb)	16	88520014	88601574	81561	1	161882	uc002fkv.3	1667	ENSG00000179588	ZFPM1	zinc finger protein, FOG family member 1	FALSE	TRUE	TRUE	FALSE	FALSE	FALSE
20200205_TTNGFP_D4_GATA6ChIP_001_peak_11965	chr16	88522048	88522701	654	*	91.9	+	Promoter (2-3kb)	16	88520014	88601574	81561	1	161882	uc002fkv.3	2034	ENSG00000179588	ZFPM1	zinc finger protein, FOG family member 1	TRUE	TRUE	TRUE	FALSE	TRUE	FALSE
20200205_TTNGFP_D4_GATA6ChIP_001_peak_11967	chr16	88526296	88526413	118	*	14.1	+	Intron (uc002fkv.3/161882, intron 1 of 9)	16	88520014	88601574	81561	1	161882	uc002fkv.3	6282	ENSG00000179588	ZFPM1	zinc finger protein, FOG family member 1	FALSE	TRUE	TRUE	FALSE	FALSE	FALSE
20200205_TTNGFP_D4_GATA6ChIP_001_peak_11968	chr16	88527998	88529603	1606	*	185.9	+	Promoter (5-6kb)	16	88535326	88535439	114	1	100847057	uc031qxh.1	-5723	ENSG00000263456	MIR5189	microRNA 5189	TRUE	FALSE	FALSE	FALSE	TRUE	TRUE
20200205_TTNGFP_D4_GATA6ChIP_001_peak_11969	chr16	88530822	88531086	265	*	22.7	+	Promoter (4-5kb)	16	88535326	88535439	114	1	100847057	uc031qxh.1	-4240	ENSG00000263456	MIR5189	microRNA 5189	FALSE	FALSE	FALSE	FALSE	FALSE	FALSE
20200205_TTNGFP_D4_GATA6ChIP_001_peak_11970	chr16	88539330	88539510	181	*	16.5	+	Intron (uc002fkv.3/161882, intron 1 of 9)	16	88535326	88535439	114	1	100847057	uc031qxh.1	4004	ENSG00000263456	MIR5189	microRNA 5189	FALSE	FALSE	FALSE	FALSE	FALSE	FALSE
20200205_TTNGFP_D4_GATA6ChIP_001_peak_11972	chr16	88546981	88547271	291	*	18	+	Intron (uc002fkv.3/161882, intron 1 of 9)	16	88535326	88535439	114	1	100847057	uc031qxh.1	11655	ENSG00000263456	MIR5189	microRNA 5189	FALSE	FALSE	FALSE	FALSE	FALSE	FALSE
20200205_TTNGFP_D4_GATA6ChIP_001_peak_11974	chr16	88557148	88557393	246	*	21.5	+	Intron (uc002fkv.3/161882, intron 3 of 9)	16	88535326	88535439	114	1	100847057	uc031qxh.1	21822	ENSG00000263456	MIR5189	microRNA 5189	FALSE	FALSE	FALSE	FALSE	FALSE	FALSE
20200205_TTNGFP_D4_GATA6ChIP_001_peak_11975	chr16	88564026	88564861	836	*	160.8	+	Intron (uc002fkv.3/161882, intron 3 of 9)	16	88535326	88535439	114	1	100847057	uc031qxh.1	28700	ENSG00000263456	MIR5189	microRNA 5189	TRUE	FALSE	FALSE	FALSE	TRUE	TRUE
20200205_TTNGFP_D4_GATA6ChIP_001_peak_11977	chr16	88566661	88566810	150	*	16.7	+	Intron (uc002fkv.3/161882, intron 3 of 9)	16	88535326	88535439	114	1	100847057	uc031qxh.1	31335	ENSG00000263456	MIR5189	microRNA 5189	FALSE	FALSE	FALSE	FALSE	FALSE	FALSE
20200205_TTNGFP_D4_GATA6ChIP_001_peak_11978	chr16	88567468	88567676	209	*	19.5	+	Intron (uc002fkv.3/161882, intron 3 of 9)	16	88535326	88535439	114	1	100847057	uc031qxh.1	32142	ENSG00000263456	MIR5189	microRNA 5189	TRUE	FALSE	FALSE	FALSE	FALSE	FALSE
20200205_TTNGFP_D4_GATA6ChIP_001_peak_11979	chr16	88567804	88568082	279	*	24.4	+	Intron (uc002fkv.3/161882, intron 3 of 9)	16	88535326	88535439	114	1	100847057	uc031qxh.1	32478	ENSG00000263456	MIR5189	microRNA 5189	TRUE	FALSE	FALSE	FALSE	FALSE	FALSE
20200205_TTNGFP_D4_GATA6ChIP_001_peak_1198	chr1	20816647	20816840	194	*	24.4	+	Promoter (3-4kb)	1	20808884	20812728	3845	2	55450	uc001bdh.3	-3919	ENSG00000162545	CAMK2N1	calcium/calmodulin dependent protein kinase II inhibitor 1	FALSE	TRUE	FALSE	TRUE	FALSE	FALSE
20200205_TTNGFP_D4_GATA6ChIP_001_peak_11980	chr16	88579423	88580048	626	*	58.7	+	Intron (uc002fkv.3/161882, intron 3 of 9)	16	88535326	88535439	114	1	100847057	uc031qxh.1	44097	ENSG00000263456	MIR5189	microRNA 5189	TRUE	FALSE	FALSE	FALSE	FALSE	TRUE
20200205_TTNGFP_D4_GATA6ChIP_001_peak_11981	chr16	88582665	88583396	732	*	45.4	+	Intron (uc002fkv.3/161882, intron 4 of 9)	16	88535326	88535439	114	1	100847057	uc031qxh.1	47339	ENSG00000263456	MIR5189	microRNA 5189	TRUE	FALSE	FALSE	FALSE	FALSE	FALSE
20200205_TTNGFP_D4_GATA6ChIP_001_peak_11982	chr16	88588664	88589003	340	*	25.9	+	Intron (uc002fkv.3/161882, intron 4 of 9)	16	88636789	88677792	41004	1	124245	uc021tmm.1	-47786	ENSG00000158545	ZC3H18	zinc finger CCCH-type containing 18	TRUE	FALSE	FALSE	FALSE	FALSE	FALSE
20200205_TTNGFP_D4_GATA6ChIP_001_peak_11983	chr16	88595274	88595672	399	*	30.1	+	Intron (uc002fkv.3/161882, intron 6 of 9)	16	88636789	88677792	41004	1	124245	uc021tmm.1	-41117	ENSG00000158545	ZC3H18	zinc finger CCCH-type containing 18	FALSE	FALSE	FALSE	FALSE	FALSE	FALSE
20200205_TTNGFP_D4_GATA6ChIP_001_peak_11985	chr16	88616438	88616679	242	*	18.8	+	Distal Intergenic	16	88636789	88677792	41004	1	124245	uc021tmm.1	-20110	ENSG00000158545	ZC3H18	zinc finger CCCH-type containing 18	FALSE	FALSE	FALSE	FALSE	FALSE	FALSE
20200205_TTNGFP_D4_GATA6ChIP_001_peak_1199	chr1	20834681	20834838	158	*	22.9	+	Promoter (<=1kb)	1	20825941	20834674	8734	2	79594	uc001bdi.4	-7	ENSG00000090432	MUL1	mitochondrial E3 ubiquitin protein ligase 1	FALSE	FALSE	FALSE	FALSE	TRUE	TRUE
20200205_TTNGFP_D4_GATA6ChIP_001_peak_11990	chr16	88665521	88665669	149	*	19.8	+	Intron (uc021tmm.1/124245, intron 6 of 8)	16	88677676	88698372	20697	1	124245	uc010chw.3	-12007	ENSG00000158545	ZC3H18	zinc finger CCCH-type containing 18	FALSE	FALSE	FALSE	FALSE	FALSE	FALSE
20200205_TTNGFP_D4_GATA6ChIP_001_peak_11991	chr16	88668467	88668677	211	*	20.7	+	Promoter (8-9kb)	16	88677676	88698372	20697	1	124245	uc010chw.3	-8999	ENSG00000158545	ZC3H18	zinc finger CCCH-type containing 18	FALSE	FALSE	FALSE	FALSE	FALSE	FALSE
20200205_TTNGFP_D4_GATA6ChIP_001_peak_11992	chr16	88681671	88681804	134	*	10.9	+	Intron (uc002fky.3/124245, intron 8 of 17)	16	88677676	88698372	20697	1	124245	uc010chw.3	3995	ENSG00000158545	ZC3H18	zinc finger CCCH-type containing 18	FALSE	FALSE	FALSE	FALSE	FALSE	FALSE
20200205_TTNGFP_D4_GATA6ChIP_001_peak_11993	chr16	88682209	88682373	165	*	12.9	+	Intron (uc002fky.3/124245, intron 8 of 17)	16	88677676	88698372	20697	1	124245	uc010chw.3	4533	ENSG00000158545	ZC3H18	zinc finger CCCH-type containing 18	FALSE	FALSE	FALSE	FALSE	FALSE	FALSE
20200205_TTNGFP_D4_GATA6ChIP_001_peak_11996	chr16	88708850	88709012	163	*	19.1	+	Downstream (<1kb)	16	88705001	88706882	1882	1	27189	uc002fla.3	3849	ENSG00000124391	IL17C	interleukin 17C	FALSE	FALSE	FALSE	FALSE	FALSE	FALSE
20200205_TTNGFP_D4_GATA6ChIP_001_peak_11999	chr16	88716829	88717019	191	*	13.6	+	Promoter (<=1kb)	16	88709697	88717492	7796	2	1535	uc002flb.4	473	ENSG00000051523	CYBA	cytochrome b-245 alpha chain	FALSE	FALSE	FALSE	TRUE	FALSE	FALSE
20200205_TTNGFP_D4_GATA6ChIP_001_peak_12	chr1	897563	897744	182	*	20	+	Promoter (<=1kb)	1	897735	899229	1495	1	339451	uc010nyb.1	0	ENSG00000187961	KLHL17	kelch like family member 17	FALSE	FALSE	FALSE	FALSE	FALSE	FALSE
20200205_TTNGFP_D4_GATA6ChIP_001_peak_120	chr1	1471652	1471819	168	*	12.7	+	Intron (uc009vkf.3/339453, intron 2 of 3)	1	1470158	1475740	5583	2	339453	uc009vkf.3	3921	ENSG00000205090	TMEM240	transmembrane protein 240	FALSE	FALSE	FALSE	FALSE	FALSE	FALSE
20200205_TTNGFP_D4_GATA6ChIP_001_peak_1200	chr1	20879325	20879449	125	*	6.1	+	Promoter (<=1kb)	1	20878932	20881513	2582	1	163933	uc001bdj.3	393	ENSG00000183114	FAM43B	family with sequence similarity 43 member B	FALSE	FALSE	FALSE	FALSE	FALSE	FALSE
20200205_TTNGFP_D4_GATA6ChIP_001_peak_12003	chr16	88754293	88754967	675	*	72.5	+	Promoter (1-2kb)	16	88744090	88752882	8793	2	333929	uc002flj.3	-1411	ENSG00000185669	SNAI3	snail family transcriptional repressor 3	TRUE	FALSE	FALSE	FALSE	TRUE	TRUE
20200205_TTNGFP_D4_GATA6ChIP_001_peak_12005	chr16	88761661	88761875	215	*	20.1	+	Downstream (1-2kb)	16	88762903	88770025	7123	2	115992	uc021tmn.1	8150	ENSG00000158717	RNF166	ring finger protein 166	FALSE	FALSE	FALSE	FALSE	FALSE	FALSE
20200205_TTNGFP_D4_GATA6ChIP_001_peak_12006	chr16	88762438	88762794	357	*	32.4	+	Downstream (<1kb)	16	88762903	88770025	7123	2	115992	uc021tmn.1	7231	ENSG00000158717	RNF166	ring finger protein 166	FALSE	FALSE	FALSE	FALSE	FALSE	FALSE
20200205_TTNGFP_D4_GATA6ChIP_001_peak_12007	chr16	88763004	88763133	130	*	10.4	+	3' UTR	16	88762903	88770025	7123	2	115992	uc021tmn.1	6892	ENSG00000158717	RNF166	ring finger protein 166	FALSE	FALSE	FALSE	FALSE	FALSE	FALSE
20200205_TTNGFP_D4_GATA6ChIP_001_peak_12009	chr16	88765524	88765766	243	*	21.6	+	Intron (uc021tmn.1/115992, intron 3 of 5)	16	88762903	88770025	7123	2	115992	uc021tmn.1	4259	ENSG00000158717	RNF166	ring finger protein 166	FALSE	FALSE	FALSE	FALSE	FALSE	FALSE
20200205_TTNGFP_D4_GATA6ChIP_001_peak_1201	chr1	20880897	20881063	167	*	7.9	+	Promoter (1-2kb)	1	20878932	20881513	2582	1	163933	uc001bdj.3	1965	ENSG00000183114	FAM43B	family with sequence similarity 43 member B	FALSE	FALSE	FALSE	FALSE	FALSE	TRUE
20200205_TTNGFP_D4_GATA6ChIP_001_peak_12012	chr16	88768574	88768800	227	*	23.3	+	Promoter (1-2kb)	16	88762903	88770025	7123	2	115992	uc021tmn.1	1225	ENSG00000158717	RNF166	ring finger protein 166	FALSE	FALSE	FALSE	FALSE	FALSE	FALSE
20200205_TTNGFP_D4_GATA6ChIP_001_peak_12014	chr16	88782096	88782263	168	*	12.1	+	Promoter (<=1kb)	16	88781746	88782698	953	2	9780	uc002flo.5	435	ENSG00000103335	PIEZO1	piezo type mechanosensitive ion channel component 1	FALSE	TRUE	TRUE	FALSE	FALSE	FALSE
20200205_TTNGFP_D4_GATA6ChIP_001_peak_12015	chr16	88782621	88782907	287	*	27.1	+	Promoter (<=1kb)	16	88782686	88782745	60	2	100616167	uc021tmp.1	0	ENSG00000284585	MIR4722	microRNA 4722	TRUE	FALSE	FALSE	FALSE	FALSE	FALSE
20200205_TTNGFP_D4_GATA6ChIP_001_peak_12016	chr16	88786209	88786341	133	*	17.7	+	Promoter (<=1kb)	16	88781746	88786368	4623	2	9780	uc002flq.4	27	ENSG00000103335	PIEZO1	piezo type mechanosensitive ion channel component 1	FALSE	TRUE	TRUE	FALSE	FALSE	FALSE
20200205_TTNGFP_D4_GATA6ChIP_001_peak_12018	chr16	88792425	88792657	233	*	21.3	+	Promoter (6-7kb)	16	88781746	88786368	4623	2	9780	uc002flq.4	-6057	ENSG00000103335	PIEZO1	piezo type mechanosensitive ion channel component 1	FALSE	TRUE	TRUE	FALSE	FALSE	FALSE
20200205_TTNGFP_D4_GATA6ChIP_001_peak_1202	chr1	20915390	20915529	140	*	11.2	+	Promoter (<=1kb)	1	20915444	20945400	29957	1	978	uc001bdk.3	0	ENSG00000158825	CDA	cytidine deaminase	FALSE	FALSE	FALSE	TRUE	TRUE	TRUE
20200205_TTNGFP_D4_GATA6ChIP_001_peak_12020	chr16	88794604	88794776	173	*	15.6	+	Intron (uc010cib.3/9780, intron 11 of 25)	16	88781746	88802816	21071	2	9780	uc010cib.3	8040	ENSG00000103335	PIEZO1	piezo type mechanosensitive ion channel component 1	FALSE	TRUE	TRUE	FALSE	TRUE	TRUE
20200205_TTNGFP_D4_GATA6ChIP_001_peak_12023	chr16	88799334	88799474	141	*	16	+	Intron (uc010vpc.1/uc010vpc.1, intron 1 of 2)	16	88781746	88802816	21071	2	9780	uc010cib.3	3342	ENSG00000103335	PIEZO1	piezo type mechanosensitive ion channel component 1	FALSE	TRUE	TRUE	FALSE	FALSE	FALSE
20200205_TTNGFP_D4_GATA6ChIP_001_peak_12025	chr16	88800450	88800748	299	*	20.3	+	Promoter (2-3kb)	16	88781746	88802816	21071	2	9780	uc010cib.3	2068	ENSG00000103335	PIEZO1	piezo type mechanosensitive ion channel component 1	FALSE	TRUE	TRUE	FALSE	FALSE	FALSE
20200205_TTNGFP_D4_GATA6ChIP_001_peak_1203	chr1	20975594	20975768	175	*	13.2	+	Exon (uc001bdm.3/65018, exon 7 of 8)	1	20972001	20978004	6004	1	65018	uc001bdn.3	3593	ENSG00000158828	PINK1	PTEN induced kinase 1	FALSE	FALSE	FALSE	FALSE	FALSE	FALSE
20200205_TTNGFP_D4_GATA6ChIP_001_peak_12030	chr16	88807572	88807735	164	*	16.2	+	Promoter (4-5kb)	16	88781746	88802816	21071	2	9780	uc010cib.3	-4756	ENSG00000103335	PIEZO1	piezo type mechanosensitive ion channel component 1	FALSE	TRUE	TRUE	FALSE	FALSE	FALSE
20200205_TTNGFP_D4_GATA6ChIP_001_peak_12031	chr16	88808600	88808873	274	*	17.3	+	Promoter (5-6kb)	16	88781746	88802816	21071	2	9780	uc010cib.3	-5784	ENSG00000103335	PIEZO1	piezo type mechanosensitive ion channel component 1	FALSE	TRUE	TRUE	FALSE	FALSE	FALSE
20200205_TTNGFP_D4_GATA6ChIP_001_peak_12032	chr16	88812914	88813061	148	*	17.4	+	Intron (uc010vpb.2/9780, intron 2 of 50)	16	88781746	88802816	21071	2	9780	uc010cib.3	-10098	ENSG00000103335	PIEZO1	piezo type mechanosensitive ion channel component 1	FALSE	TRUE	TRUE	FALSE	FALSE	FALSE
20200205_TTNGFP_D4_GATA6ChIP_001_peak_12033	chr16	88814042	88814192	151	*	12.4	+	Intron (uc010vpb.2/9780, intron 2 of 50)	16	88781746	88802816	21071	2	9780	uc010cib.3	-11226	ENSG00000103335	PIEZO1	piezo type mechanosensitive ion channel component 1	FALSE	TRUE	TRUE	FALSE	FALSE	FALSE
20200205_TTNGFP_D4_GATA6ChIP_001_peak_12034	chr16	88816869	88817161	293	*	22.3	+	Intron (uc010vpb.2/9780, intron 1 of 50)	16	88781746	88802816	21071	2	9780	uc010cib.3	-14053	ENSG00000103335	PIEZO1	piezo type mechanosensitive ion channel component 1	TRUE	TRUE	TRUE	FALSE	FALSE	FALSE
20200205_TTNGFP_D4_GATA6ChIP_001_peak_12035	chr16	88820289	88820600	312	*	25.3	+	Intron (uc010vpb.2/9780, intron 1 of 50)	16	88781746	88802816	21071	2	9780	uc010cib.3	-17473	ENSG00000103335	PIEZO1	piezo type mechanosensitive ion channel component 1	FALSE	TRUE	TRUE	FALSE	FALSE	FALSE
20200205_TTNGFP_D4_GATA6ChIP_001_peak_12036	chr16	88824235	88824612	378	*	21.8	+	Intron (uc010vpb.2/9780, intron 1 of 50)	16	88781746	88802816	21071	2	9780	uc010cib.3	-21419	ENSG00000103335	PIEZO1	piezo type mechanosensitive ion channel component 1	FALSE	TRUE	TRUE	FALSE	FALSE	FALSE
20200205_TTNGFP_D4_GATA6ChIP_001_peak_12038	chr16	88830190	88830365	176	*	16.2	+	Intron (uc010vpb.2/9780, intron 1 of 50)	16	88781746	88851372	69627	2	9780	uc010vpb.2	21007	ENSG00000103335	PIEZO1	piezo type mechanosensitive ion channel component 1	FALSE	TRUE	TRUE	FALSE	TRUE	TRUE
20200205_TTNGFP_D4_GATA6ChIP_001_peak_12039	chr16	88836693	88836838	146	*	12.3	+	Intron (uc010vpb.2/9780, intron 1 of 50)	16	88781746	88851372	69627	2	9780	uc010vpb.2	14534	ENSG00000103335	PIEZO1	piezo type mechanosensitive ion channel component 1	FALSE	TRUE	TRUE	FALSE	FALSE	FALSE
20200205_TTNGFP_D4_GATA6ChIP_001_peak_1204	chr1	20987689	20988189	501	*	61	+	Promoter (<=1kb)	1	20978260	20988037	9778	2	1650	uc001bdo.1	0	ENSG00000244038	DDOST	dolichyl-diphosphooligosaccharide--protein glycosyltransferase non-catalytic subunit	TRUE	FALSE	FALSE	FALSE	TRUE	TRUE
20200205_TTNGFP_D4_GATA6ChIP_001_peak_12040	chr16	88837010	88837997	988	*	140.9	+	Intron (uc010vpb.2/9780, intron 1 of 50)	16	88781746	88851372	69627	2	9780	uc010vpb.2	13375	ENSG00000103335	PIEZO1	piezo type mechanosensitive ion channel component 1	TRUE	TRUE	TRUE	FALSE	TRUE	TRUE
20200205_TTNGFP_D4_GATA6ChIP_001_peak_12041	chr16	88840365	88840617	253	*	25.9	+	Intron (uc010vpb.2/9780, intron 1 of 50)	16	88781746	88851372	69627	2	9780	uc010vpb.2	10755	ENSG00000103335	PIEZO1	piezo type mechanosensitive ion channel component 1	TRUE	TRUE	TRUE	FALSE	FALSE	FALSE
20200205_TTNGFP_D4_GATA6ChIP_001_peak_12042	chr16	88841258	88841533	276	*	18.6	+	Intron (uc010vpb.2/9780, intron 1 of 50)	16	88781746	88851372	69627	2	9780	uc010vpb.2	9839	ENSG00000103335	PIEZO1	piezo type mechanosensitive ion channel component 1	FALSE	TRUE	TRUE	FALSE	FALSE	FALSE
20200205_TTNGFP_D4_GATA6ChIP_001_peak_12047	chr16	88874116	88874292	177	*	12.1	+	Intron (uc002flu.3/81620, intron 9 of 9)	16	88870186	88875666	5481	1	81620	uc002flu.3	3930	ENSG00000167513	CDT1	chromatin licensing and DNA replication factor 1	FALSE	FALSE	TRUE	FALSE	FALSE	FALSE
20200205_TTNGFP_D4_GATA6ChIP_001_peak_12048	chr16	88881570	88881885	316	*	25.1	+	Promoter (3-4kb)	16	88875877	88878342	2466	2	353	uc002flw.3	-3228	ENSG00000198931	APRT	adenine phosphoribosyltransferase	FALSE	FALSE	FALSE	FALSE	FALSE	FALSE
20200205_TTNGFP_D4_GATA6ChIP_001_peak_12049	chr16	88887128	88887759	632	*	46.9	+	Promoter (8-9kb)	16	88875877	88878342	2466	2	353	uc002flw.3	-8786	ENSG00000198931	APRT	adenine phosphoribosyltransferase	FALSE	FALSE	FALSE	FALSE	FALSE	FALSE
20200205_TTNGFP_D4_GATA6ChIP_001_peak_12050	chr16	88888807	88889139	333	*	16.8	+	Exon (uc002fly.4/2588, exon 12 of 14)	16	88875877	88878342	2466	2	353	uc002flw.3	-10465	ENSG00000198931	APRT	adenine phosphoribosyltransferase	FALSE	FALSE	FALSE	FALSE	FALSE	FALSE
20200205_TTNGFP_D4_GATA6ChIP_001_peak_12051	chr16	88894923	88895297	375	*	28.5	+	Intron (uc002fly.4/2588, intron 9 of 13)	16	88875877	88878342	2466	2	353	uc002flw.3	-16581	ENSG00000198931	APRT	adenine phosphoribosyltransferase	FALSE	FALSE	FALSE	FALSE	FALSE	FALSE
20200205_TTNGFP_D4_GATA6ChIP_001_peak_12052	chr16	88900518	88900764	247	*	13.9	+	Intron (uc002fly.4/2588, intron 8 of 13)	16	88922628	88927520	4893	1	51693	uc010cie.3	-21864	ENSG00000167515	TRAPPC2L	trafficking protein particle complex 2 like	FALSE	FALSE	FALSE	FALSE	FALSE	FALSE
20200205_TTNGFP_D4_GATA6ChIP_001_peak_12055	chr16	88908969	88909284	316	*	21.2	+	Exon (uc002fly.4/2588, exon 2 of 14)	16	88922628	88927520	4893	1	51693	uc010cie.3	-13344	ENSG00000167515	TRAPPC2L	trafficking protein particle complex 2 like	FALSE	FALSE	FALSE	FALSE	FALSE	FALSE
20200205_TTNGFP_D4_GATA6ChIP_001_peak_12056	chr16	88909645	88909880	236	*	22.1	+	Intron (uc002fly.4/2588, intron 1 of 13)	16	88922628	88927520	4893	1	51693	uc010cie.3	-12748	ENSG00000167515	TRAPPC2L	trafficking protein particle complex 2 like	FALSE	FALSE	FALSE	FALSE	FALSE	FALSE
20200205_TTNGFP_D4_GATA6ChIP_001_peak_12057	chr16	88916602	88916910	309	*	26.9	+	Promoter (5-6kb)	16	88922628	88927520	4893	1	51693	uc010cie.3	-5718	ENSG00000167515	TRAPPC2L	trafficking protein particle complex 2 like	FALSE	FALSE	FALSE	FALSE	FALSE	FALSE
20200205_TTNGFP_D4_GATA6ChIP_001_peak_12059	chr16	88929357	88929621	265	*	19.2	+	Intron (uc031qxi.1/390748, intron 6 of 6)	16	88928036	88933068	5033	2	390748	uc031qxi.1	3447	ENSG00000205022	PABPN1L	poly(A) binding protein nuclear 1 like, cytoplasmic	FALSE	FALSE	FALSE	FALSE	FALSE	FALSE
20200205_TTNGFP_D4_GATA6ChIP_001_peak_1206	chr1	21023629	21023841	213	*	21.2	+	Promoter (1-2kb)	1	20990507	21024981	34475	2	57576	uc009vpx.3	1140	ENSG00000117245	KIF17	kinesin family member 17	FALSE	FALSE	FALSE	FALSE	FALSE	FALSE
20200205_TTNGFP_D4_GATA6ChIP_001_peak_12060	chr16	88936108	88936474	367	*	32.1	+	Promoter (3-4kb)	16	88929748	88933068	3321	2	390748	uc010vpe.2	-3040	ENSG00000205022	PABPN1L	poly(A) binding protein nuclear 1 like, cytoplasmic	FALSE	FALSE	FALSE	FALSE	FALSE	FALSE
20200205_TTNGFP_D4_GATA6ChIP_001_peak_12061	chr16	88936701	88936869	169	*	13.8	+	Promoter (3-4kb)	16	88929748	88933068	3321	2	390748	uc010vpe.2	-3633	ENSG00000205022	PABPN1L	poly(A) binding protein nuclear 1 like, cytoplasmic	FALSE	FALSE	FALSE	FALSE	FALSE	FALSE
20200205_TTNGFP_D4_GATA6ChIP_001_peak_12062	chr16	88938029	88938149	121	*	12.3	+	Promoter (4-5kb)	16	88929748	88933068	3321	2	390748	uc010vpe.2	-4961	ENSG00000205022	PABPN1L	poly(A) binding protein nuclear 1 like, cytoplasmic	FALSE	FALSE	FALSE	FALSE	FALSE	FALSE
20200205_TTNGFP_D4_GATA6ChIP_001_peak_12065	chr16	88947379	88947530	152	*	11.2	+	Promoter (<=1kb)	16	88941263	88947565	6303	2	863	uc002fmk.2	35	ENSG00000129993	CBFA2T3	CBFA2/RUNX1 translocation partner 3	FALSE	FALSE	FALSE	FALSE	FALSE	FALSE
20200205_TTNGFP_D4_GATA6ChIP_001_peak_12066	chr16	88952087	88952369	283	*	16.7	+	Promoter (4-5kb)	16	88941263	88947565	6303	2	863	uc002fmk.2	-4522	ENSG00000129993	CBFA2T3	CBFA2/RUNX1 translocation partner 3	FALSE	FALSE	FALSE	FALSE	FALSE	FALSE
20200205_TTNGFP_D4_GATA6ChIP_001_peak_12067	chr16	88956132	88956322	191	*	11.4	+	Promoter (8-9kb)	16	88941263	88947565	6303	2	863	uc002fmk.2	-8567	ENSG00000129993	CBFA2T3	CBFA2/RUNX1 translocation partner 3	FALSE	FALSE	FALSE	FALSE	FALSE	FALSE
20200205_TTNGFP_D4_GATA6ChIP_001_peak_12068	chr16	88961820	88962718	899	*	64.8	+	Intron (uc002fml.2/863, intron 2 of 10)	16	88941263	88947565	6303	2	863	uc002fmk.2	-14255	ENSG00000129993	CBFA2T3	CBFA2/RUNX1 translocation partner 3	TRUE	FALSE	FALSE	FALSE	FALSE	FALSE
20200205_TTNGFP_D4_GATA6ChIP_001_peak_12069	chr16	88969837	88970011	175	*	15.3	+	Intron (uc002fml.2/863, intron 1 of 10)	16	88941263	88947565	6303	2	863	uc002fmk.2	-22272	ENSG00000129993	CBFA2T3	CBFA2/RUNX1 translocation partner 3	FALSE	FALSE	FALSE	FALSE	FALSE	FALSE
20200205_TTNGFP_D4_GATA6ChIP_001_peak_1207	chr1	21044886	21045004	119	*	11.8	+	Promoter (<=1kb)	1	20990507	21044317	53811	2	57576	uc001bds.4	-569	ENSG00000117245	KIF17	kinesin family member 17	FALSE	FALSE	FALSE	FALSE	FALSE	FALSE
20200205_TTNGFP_D4_GATA6ChIP_001_peak_12071	chr16	88976993	88977201	209	*	18.6	+	Intron (uc002fml.2/863, intron 1 of 10)	16	88941263	88947565	6303	2	863	uc002fmk.2	-29428	ENSG00000129993	CBFA2T3	CBFA2/RUNX1 translocation partner 3	FALSE	FALSE	FALSE	FALSE	FALSE	FALSE
20200205_TTNGFP_D4_GATA6ChIP_001_peak_12072	chr16	88977381	88977871	491	*	41	+	Intron (uc002fml.2/863, intron 1 of 10)	16	88941263	89007608	66346	2	863	uc002fml.2	29737	ENSG00000129993	CBFA2T3	CBFA2/RUNX1 translocation partner 3	FALSE	FALSE	FALSE	FALSE	FALSE	FALSE
20200205_TTNGFP_D4_GATA6ChIP_001_peak_12073	chr16	88988665	88988841	177	*	19.2	+	Intron (uc002fml.2/863, intron 1 of 10)	16	88941263	89007608	66346	2	863	uc002fml.2	18767	ENSG00000129993	CBFA2T3	CBFA2/RUNX1 translocation partner 3	FALSE	FALSE	FALSE	FALSE	FALSE	FALSE
20200205_TTNGFP_D4_GATA6ChIP_001_peak_12074	chr16	88992909	88993057	149	*	15.3	+	Intron (uc002fml.2/863, intron 1 of 10)	16	88941263	89007608	66346	2	863	uc002fml.2	14551	ENSG00000129993	CBFA2T3	CBFA2/RUNX1 translocation partner 3	FALSE	FALSE	FALSE	FALSE	FALSE	FALSE
20200205_TTNGFP_D4_GATA6ChIP_001_peak_1208	chr1	21049152	21049299	148	*	14.1	+	Promoter (4-5kb)	1	20990507	21044317	53811	2	57576	uc001bds.4	-4835	ENSG00000117245	KIF17	kinesin family member 17	FALSE	FALSE	FALSE	FALSE	FALSE	TRUE
20200205_TTNGFP_D4_GATA6ChIP_001_peak_12081	chr16	89036675	89036862	188	*	8.9	+	Intron (uc002fmm.2/863, intron 1 of 11)	16	88941263	89043504	102242	2	863	uc002fmm.2	6642	ENSG00000129993	CBFA2T3	CBFA2/RUNX1 translocation partner 3	FALSE	FALSE	FALSE	FALSE	FALSE	FALSE
20200205_TTNGFP_D4_GATA6ChIP_001_peak_12083	chr16	89042864	89043260	397	*	19.5	+	Promoter (<=1kb)	16	88941263	89043504	102242	2	863	uc002fmm.2	244	ENSG00000129993	CBFA2T3	CBFA2/RUNX1 translocation partner 3	FALSE	FALSE	FALSE	FALSE	FALSE	FALSE
20200205_TTNGFP_D4_GATA6ChIP_001_peak_12084	chr16	89058695	89059322	628	*	90.1	+	Distal Intergenic	16	88951454	89043504	92051	2	863	uc002fmn.2	-15191	ENSG00000129993	CBFA2T3	CBFA2/RUNX1 translocation partner 3	TRUE	FALSE	FALSE	FALSE	TRUE	TRUE
20200205_TTNGFP_D4_GATA6ChIP_001_peak_12087	chr16	89070620	89070973	354	*	50.3	+	Distal Intergenic	16	88951454	89043504	92051	2	863	uc002fmn.2	-27116	ENSG00000129993	CBFA2T3	CBFA2/RUNX1 translocation partner 3	TRUE	FALSE	FALSE	FALSE	FALSE	TRUE
20200205_TTNGFP_D4_GATA6ChIP_001_peak_12089	chr16	89081925	89082422	498	*	33.9	+	Distal Intergenic	16	88951454	89043504	92051	2	863	uc002fmn.2	-38421	ENSG00000129993	CBFA2T3	CBFA2/RUNX1 translocation partner 3	FALSE	FALSE	FALSE	FALSE	FALSE	FALSE
20200205_TTNGFP_D4_GATA6ChIP_001_peak_1209	chr1	21050026	21050206	181	*	13.8	+	Promoter (5-6kb)	1	20990507	21044317	53811	2	57576	uc001bds.4	-5709	ENSG00000117245	KIF17	kinesin family member 17	FALSE	FALSE	FALSE	FALSE	FALSE	FALSE
20200205_TTNGFP_D4_GATA6ChIP_001_peak_12091	chr16	89086033	89086263	231	*	17.7	+	Distal Intergenic	16	88951454	89043504	92051	2	863	uc002fmn.2	-42529	ENSG00000129993	CBFA2T3	CBFA2/RUNX1 translocation partner 3	FALSE	FALSE	FALSE	FALSE	FALSE	FALSE
20200205_TTNGFP_D4_GATA6ChIP_001_peak_12092	chr16	89099860	89100063	204	*	12.3	+	Distal Intergenic	16	88951454	89043504	92051	2	863	uc002fmn.2	-56356	ENSG00000129993	CBFA2T3	CBFA2/RUNX1 translocation partner 3	FALSE	FALSE	FALSE	FALSE	FALSE	FALSE
20200205_TTNGFP_D4_GATA6ChIP_001_peak_12093	chr16	89100602	89100897	296	*	34.1	+	Distal Intergenic	16	88951454	89043504	92051	2	863	uc002fmn.2	-57098	ENSG00000129993	CBFA2T3	CBFA2/RUNX1 translocation partner 3	FALSE	FALSE	FALSE	FALSE	FALSE	FALSE
20200205_TTNGFP_D4_GATA6ChIP_001_peak_12094	chr16	89103183	89103635	453	*	29.4	+	Distal Intergenic	16	89160217	89222171	61955	1	197322	uc002fmp.3	-56582	ENSG00000176715	ACSF3	acyl-CoA synthetase family member 3	FALSE	FALSE	FALSE	FALSE	FALSE	FALSE
20200205_TTNGFP_D4_GATA6ChIP_001_peak_12097	chr16	89107503	89107822	320	*	18.8	+	Distal Intergenic	16	89160217	89222171	61955	1	197322	uc002fmp.3	-52395	ENSG00000176715	ACSF3	acyl-CoA synthetase family member 3	FALSE	FALSE	FALSE	FALSE	FALSE	FALSE
20200205_TTNGFP_D4_GATA6ChIP_001_peak_12098	chr16	89108624	89108852	229	*	21	+	Distal Intergenic	16	89160217	89222171	61955	1	197322	uc002fmp.3	-51365	ENSG00000176715	ACSF3	acyl-CoA synthetase family member 3	FALSE	FALSE	FALSE	FALSE	FALSE	FALSE
20200205_TTNGFP_D4_GATA6ChIP_001_peak_12099	chr16	89109116	89109273	158	*	6.7	+	Distal Intergenic	16	89160217	89222171	61955	1	197322	uc002fmp.3	-50944	ENSG00000176715	ACSF3	acyl-CoA synthetase family member 3	FALSE	FALSE	FALSE	FALSE	FALSE	FALSE
20200205_TTNGFP_D4_GATA6ChIP_001_peak_1210	chr1	21054322	21054466	145	*	11.7	+	Exon (uc009vpy.1/400745, exon 2 of 10)	1	21046225	21059133	12909	2	400745	uc001bdt.1	4667	ENSG00000189410	SH2D5	SH2 domain containing 5	FALSE	FALSE	FALSE	FALSE	FALSE	FALSE
20200205_TTNGFP_D4_GATA6ChIP_001_peak_12100	chr16	89110205	89110867	663	*	42.2	+	Distal Intergenic	16	89160217	89222171	61955	1	197322	uc002fmp.3	-49350	ENSG00000176715	ACSF3	acyl-CoA synthetase family member 3	FALSE	FALSE	FALSE	FALSE	FALSE	FALSE
20200205_TTNGFP_D4_GATA6ChIP_001_peak_12103	chr16	89123771	89123895	125	*	16.8	+	Distal Intergenic	16	89160217	89222171	61955	1	197322	uc002fmp.3	-36322	ENSG00000176715	ACSF3	acyl-CoA synthetase family member 3	FALSE	FALSE	FALSE	FALSE	FALSE	FALSE
20200205_TTNGFP_D4_GATA6ChIP_001_peak_12104	chr16	89124616	89124767	152	*	18.3	+	Distal Intergenic	16	89160217	89222171	61955	1	197322	uc002fmp.3	-35450	ENSG00000176715	ACSF3	acyl-CoA synthetase family member 3	FALSE	FALSE	FALSE	FALSE	FALSE	FALSE
20200205_TTNGFP_D4_GATA6ChIP_001_peak_12106	chr16	89145883	89146031	149	*	12.6	+	Distal Intergenic	16	89160217	89222171	61955	1	197322	uc002fmp.3	-14186	ENSG00000176715	ACSF3	acyl-CoA synthetase family member 3	FALSE	FALSE	FALSE	FALSE	FALSE	FALSE
20200205_TTNGFP_D4_GATA6ChIP_001_peak_12107	chr16	89146673	89147201	529	*	34.8	+	Distal Intergenic	16	89160217	89222171	61955	1	197322	uc002fmp.3	-13016	ENSG00000176715	ACSF3	acyl-CoA synthetase family member 3	FALSE	FALSE	FALSE	FALSE	FALSE	FALSE
20200205_TTNGFP_D4_GATA6ChIP_001_peak_12108	chr16	89164880	89165033	154	*	30.4	+	5' UTR	16	89160217	89222171	61955	1	197322	uc021tmq.1	4663	ENSG00000176715	ACSF3	acyl-CoA synthetase family member 3	FALSE	FALSE	FALSE	FALSE	TRUE	TRUE
20200205_TTNGFP_D4_GATA6ChIP_001_peak_12109	chr16	89167323	89167499	177	*	18.3	+	Exon (uc002fmp.3/197322, exon 3 of 11)	16	89160217	89222171	61955	1	197322	uc021tmq.1	7106	ENSG00000176715	ACSF3	acyl-CoA synthetase family member 3	FALSE	FALSE	FALSE	FALSE	FALSE	FALSE
20200205_TTNGFP_D4_GATA6ChIP_001_peak_1211	chr1	21059508	21059633	126	*	11.7	+	Promoter (<=1kb)	1	21046225	21059330	13106	2	400745	uc001bdu.1	-178	ENSG00000189410	SH2D5	SH2 domain containing 5	FALSE	FALSE	FALSE	FALSE	TRUE	FALSE
20200205_TTNGFP_D4_GATA6ChIP_001_peak_12114	chr16	89202224	89202668	445	*	26.9	+	Promoter (<=1kb)	16	89202956	89222171	19216	1	197322	uc031qxj.1	-288	ENSG00000176715	ACSF3	acyl-CoA synthetase family member 3	FALSE	FALSE	FALSE	FALSE	FALSE	FALSE
20200205_TTNGFP_D4_GATA6ChIP_001_peak_12115	chr16	89206479	89206723	245	*	20.1	+	Intron (uc002fmp.3/197322, intron 8 of 10)	16	89202956	89222171	19216	1	197322	uc031qxj.1	3523	ENSG00000176715	ACSF3	acyl-CoA synthetase family member 3	FALSE	FALSE	FALSE	FALSE	FALSE	FALSE
20200205_TTNGFP_D4_GATA6ChIP_001_peak_12116	chr16	89207907	89208059	153	*	17.7	+	Intron (uc002fmp.3/197322, intron 8 of 10)	16	89202956	89222171	19216	1	197322	uc031qxj.1	4951	ENSG00000176715	ACSF3	acyl-CoA synthetase family member 3	FALSE	FALSE	FALSE	FALSE	FALSE	FALSE
20200205_TTNGFP_D4_GATA6ChIP_001_peak_12117	chr16	89208248	89208400	153	*	13.8	+	Intron (uc002fmp.3/197322, intron 8 of 10)	16	89202956	89222171	19216	1	197322	uc031qxj.1	5292	ENSG00000176715	ACSF3	acyl-CoA synthetase family member 3	FALSE	FALSE	FALSE	FALSE	FALSE	FALSE
20200205_TTNGFP_D4_GATA6ChIP_001_peak_12118	chr16	89209653	89209770	118	*	12.3	+	Intron (uc002fmp.3/197322, intron 8 of 10)	16	89202956	89222171	19216	1	197322	uc031qxj.1	6697	ENSG00000176715	ACSF3	acyl-CoA synthetase family member 3	FALSE	FALSE	FALSE	FALSE	FALSE	FALSE
20200205_TTNGFP_D4_GATA6ChIP_001_peak_12119	chr16	89210479	89210637	159	*	18.5	+	Intron (uc002fmp.3/197322, intron 8 of 10)	16	89202956	89222171	19216	1	197322	uc031qxj.1	7523	ENSG00000176715	ACSF3	acyl-CoA synthetase family member 3	FALSE	FALSE	FALSE	FALSE	FALSE	FALSE
20200205_TTNGFP_D4_GATA6ChIP_001_peak_1212	chr1	21544641	21544842	202	*	14.4	+	3' UTR	1	21132785	21503381	370597	2	8672	uc001bef.3	-41260	ENSG00000075151	EIF4G3	eukaryotic translation initiation factor 4 gamma 3	FALSE	FALSE	FALSE	FALSE	TRUE	TRUE
20200205_TTNGFP_D4_GATA6ChIP_001_peak_12120	chr16	89212086	89212252	167	*	19.7	+	Intron (uc002fmp.3/197322, intron 9 of 10)	16	89202956	89222171	19216	1	197322	uc031qxj.1	9130	ENSG00000176715	ACSF3	acyl-CoA synthetase family member 3	FALSE	FALSE	FALSE	FALSE	FALSE	FALSE
20200205_TTNGFP_D4_GATA6ChIP_001_peak_12121	chr16	89218820	89219062	243	*	16.8	+	Promoter (6-7kb)	16	89225628	89230083	4456	1	283860	uc002fms.3	-6566	ENSG00000180422	LINC00304	long intergenic non-protein coding RNA 304	FALSE	FALSE	FALSE	FALSE	FALSE	FALSE
20200205_TTNGFP_D4_GATA6ChIP_001_peak_12122	chr16	89222458	89222708	251	*	17.7	+	Promoter (2-3kb)	16	89225628	89230083	4456	1	283860	uc002fms.3	-2920	ENSG00000180422	LINC00304	long intergenic non-protein coding RNA 304	FALSE	FALSE	FALSE	FALSE	FALSE	FALSE
20200205_TTNGFP_D4_GATA6ChIP_001_peak_12124	chr16	89227905	89228051	147	*	13.5	+	Promoter (2-3kb)	16	89225628	89230083	4456	1	283860	uc002fms.3	2277	ENSG00000180422	LINC00304	long intergenic non-protein coding RNA 304	FALSE	FALSE	FALSE	FALSE	FALSE	FALSE
20200205_TTNGFP_D4_GATA6ChIP_001_peak_12125	chr16	89228313	89228834	522	*	37.4	+	Promoter (2-3kb)	16	89225628	89230083	4456	1	283860	uc002fms.3	2685	ENSG00000180422	LINC00304	long intergenic non-protein coding RNA 304	FALSE	FALSE	FALSE	FALSE	FALSE	FALSE
20200205_TTNGFP_D4_GATA6ChIP_001_peak_12126	chr16	89241766	89241926	161	*	12.6	+	Intron (uc010cij.1/1013, intron 1 of 4)	16	89238163	89261900	23738	1	1013	uc002fmt.3	3603	ENSG00000129910	CDH15	cadherin 15	TRUE	FALSE	FALSE	FALSE	FALSE	FALSE
20200205_TTNGFP_D4_GATA6ChIP_001_peak_12127	chr16	89242611	89243215	605	*	49.3	+	Intron (uc010cij.1/1013, intron 1 of 4)	16	89238163	89261900	23738	1	1013	uc002fmt.3	4448	ENSG00000129910	CDH15	cadherin 15	FALSE	FALSE	FALSE	FALSE	FALSE	FALSE
20200205_TTNGFP_D4_GATA6ChIP_001_peak_12128	chr16	89250861	89251048	188	*	19.5	+	Intron (uc010cij.1/1013, intron 4 of 4)	16	89238163	89261900	23738	1	1013	uc002fmt.3	12698	ENSG00000129910	CDH15	cadherin 15	FALSE	FALSE	FALSE	FALSE	FALSE	FALSE
20200205_TTNGFP_D4_GATA6ChIP_001_peak_1213	chr1	21562664	21562849	186	*	23	+	Intron (uc001bej.2/1889, intron 10 of 16)	1	21543740	21606183	62444	2	1889	uc001bej.2	43334	ENSG00000117298	ECE1	endothelin converting enzyme 1	FALSE	FALSE	FALSE	FALSE	FALSE	FALSE
20200205_TTNGFP_D4_GATA6ChIP_001_peak_12131	chr16	89255347	89255612	266	*	18.2	+	Intron (uc002fmt.3/1013, intron 7 of 13)	16	89262169	89266529	4361	2	146429	uc021tmr.1	10917	ENSG00000259803	SLC22A31	solute carrier family 22 member 31	FALSE	FALSE	FALSE	TRUE	FALSE	FALSE
20200205_TTNGFP_D4_GATA6ChIP_001_peak_12132	chr16	89262127	89262381	255	*	22.6	+	3' UTR	16	89262169	89266529	4361	2	146429	uc021tmr.1	4148	ENSG00000259803	SLC22A31	solute carrier family 22 member 31	FALSE	FALSE	FALSE	TRUE	FALSE	FALSE
20200205_TTNGFP_D4_GATA6ChIP_001_peak_12133	chr16	89340761	89340896	136	*	16.5	+	Intron (uc002fmx.2/29123, intron 11 of 12)	16	89345480	89358185	12706	2	29123	uc002fnb.1	17289	ENSG00000167522	ANKRD11	ankyrin repeat domain 11	FALSE	FALSE	FALSE	FALSE	FALSE	FALSE
20200205_TTNGFP_D4_GATA6ChIP_001_peak_12137	chr16	89348042	89348289	248	*	13.9	+	Exon (uc002fmx.2/29123, exon 9 of 13)	16	89345480	89358185	12706	2	29123	uc002fnb.1	9896	ENSG00000167522	ANKRD11	ankyrin repeat domain 11	FALSE	FALSE	FALSE	FALSE	FALSE	FALSE
20200205_TTNGFP_D4_GATA6ChIP_001_peak_12138	chr16	89351355	89351476	122	*	7.3	+	Exon (uc002fmx.2/29123, exon 9 of 13)	16	89345480	89358185	12706	2	29123	uc002fnb.1	6709	ENSG00000167522	ANKRD11	ankyrin repeat domain 11	FALSE	FALSE	FALSE	FALSE	FALSE	FALSE
20200205_TTNGFP_D4_GATA6ChIP_001_peak_12139	chr16	89353538	89353733	196	*	15	+	3' UTR	16	89345480	89358185	12706	2	29123	uc002fnb.1	4452	ENSG00000167522	ANKRD11	ankyrin repeat domain 11	FALSE	FALSE	FALSE	FALSE	FALSE	FALSE
20200205_TTNGFP_D4_GATA6ChIP_001_peak_12141	chr16	89368231	89368658	428	*	48.3	+	Intron (uc002fmx.2/29123, intron 4 of 12)	16	89345480	89358185	12706	2	29123	uc002fnb.1	-10046	ENSG00000167522	ANKRD11	ankyrin repeat domain 11	FALSE	FALSE	FALSE	FALSE	FALSE	FALSE
20200205_TTNGFP_D4_GATA6ChIP_001_peak_12142	chr16	89370588	89370952	365	*	32.7	+	Intron (uc002fmx.2/29123, intron 4 of 12)	16	89345480	89358185	12706	2	29123	uc002fnb.1	-12403	ENSG00000167522	ANKRD11	ankyrin repeat domain 11	FALSE	FALSE	FALSE	FALSE	FALSE	FALSE
20200205_TTNGFP_D4_GATA6ChIP_001_peak_12143	chr16	89385628	89385749	122	*	21.3	+	Promoter (1-2kb)	16	89365283	89386764	21482	2	29123	uc002fnf.1	1015	ENSG00000167522	ANKRD11	ankyrin repeat domain 11	TRUE	FALSE	FALSE	FALSE	FALSE	FALSE
20200205_TTNGFP_D4_GATA6ChIP_001_peak_12147	chr16	89590609	89590752	144	*	15.6	+	Exon (uc002fni.3/6687, exon 4 of 10)	16	89574805	89624174	49370	1	6687	uc002fnj.3	15804	ENSG00000197912	SPG7	SPG7 matrix AAA peptidase subunit, paraplegin	FALSE	FALSE	FALSE	FALSE	FALSE	FALSE
20200205_TTNGFP_D4_GATA6ChIP_001_peak_12148	chr16	89603517	89603694	178	*	12.1	+	Promoter (4-5kb)	16	89607704	89619543	11840	1	6687	uc002fnk.2	-4010	ENSG00000197912	SPG7	SPG7 matrix AAA peptidase subunit, paraplegin	FALSE	FALSE	FALSE	FALSE	FALSE	FALSE
20200205_TTNGFP_D4_GATA6ChIP_001_peak_12149	chr16	89608215	89608494	280	*	26.6	+	Promoter (<=1kb)	16	89607704	89619543	11840	1	6687	uc002fnk.2	511	ENSG00000197912	SPG7	SPG7 matrix AAA peptidase subunit, paraplegin	FALSE	FALSE	FALSE	FALSE	FALSE	FALSE
20200205_TTNGFP_D4_GATA6ChIP_001_peak_1215	chr1	21589082	21589231	150	*	13.6	+	Intron (uc001bej.2/1889, intron 2 of 16)	1	21543740	21606183	62444	2	1889	uc001bej.2	16952	ENSG00000117298	ECE1	endothelin converting enzyme 1	TRUE	FALSE	FALSE	FALSE	FALSE	TRUE
20200205_TTNGFP_D4_GATA6ChIP_001_peak_12151	chr16	89620082	89620355	274	*	19.8	+	Exon (uc002fnj.3/6687, exon 15 of 17)	16	89616254	89624174	7921	1	6687	uc002fnl.3	3828	ENSG00000197912	SPG7	SPG7 matrix AAA peptidase subunit, paraplegin	FALSE	FALSE	FALSE	FALSE	FALSE	FALSE
20200205_TTNGFP_D4_GATA6ChIP_001_peak_12152	chr16	89620923	89621082	160	*	12.6	+	Exon (uc002fnj.3/6687, exon 16 of 17)	16	89616254	89624174	7921	1	6687	uc002fnl.3	4669	ENSG00000197912	SPG7	SPG7 matrix AAA peptidase subunit, paraplegin	FALSE	FALSE	FALSE	FALSE	FALSE	FALSE
20200205_TTNGFP_D4_GATA6ChIP_001_peak_12154	chr16	89639100	89639282	183	*	12.6	+	Promoter (2-3kb)	16	89642176	89663654	21479	1	27132	uc002fnp.3	-2894	ENSG00000178773	CPNE7	copine 7	FALSE	FALSE	FALSE	TRUE	FALSE	FALSE
20200205_TTNGFP_D4_GATA6ChIP_001_peak_12156	chr16	89655392	89655767	376	*	22.4	+	Intron (uc002fnp.3/27132, intron 12 of 16)	16	89642176	89663654	21479	1	27132	uc002fnq.3	13216	ENSG00000178773	CPNE7	copine 7	FALSE	FALSE	FALSE	TRUE	FALSE	FALSE
20200205_TTNGFP_D4_GATA6ChIP_001_peak_12157	chr16	89680784	89680917	134	*	21.8	+	Promoter (1-2kb)	16	89679716	89704839	25124	1	1800	uc010cin.3	1068	ENSG00000015413	DPEP1	dipeptidase 1	FALSE	FALSE	TRUE	FALSE	FALSE	FALSE
20200205_TTNGFP_D4_GATA6ChIP_001_peak_12158	chr16	89681551	89681874	324	*	21.9	+	Promoter (1-2kb)	16	89679716	89704839	25124	1	1800	uc010cin.3	1835	ENSG00000015413	DPEP1	dipeptidase 1	FALSE	FALSE	TRUE	FALSE	FALSE	FALSE
20200205_TTNGFP_D4_GATA6ChIP_001_peak_12159	chr16	89688033	89688153	121	*	22.6	+	Promoter (1-2kb)	16	89687000	89704839	17840	1	1800	uc002fnr.4	1033	ENSG00000015413	DPEP1	dipeptidase 1	FALSE	FALSE	TRUE	FALSE	FALSE	FALSE
20200205_TTNGFP_D4_GATA6ChIP_001_peak_1216	chr1	21592484	21592840	357	*	27.1	+	Intron (uc001bej.2/1889, intron 2 of 16)	1	21543740	21606183	62444	2	1889	uc001bej.2	13343	ENSG00000117298	ECE1	endothelin converting enzyme 1	FALSE	FALSE	FALSE	FALSE	FALSE	TRUE
20200205_TTNGFP_D4_GATA6ChIP_001_peak_12162	chr16	89702942	89703352	411	*	29.1	+	Exon (uc010cin.3/1800, exon 5 of 11)	16	89696697	89704839	8143	1	1800	uc002fns.4	6245	ENSG00000015413	DPEP1	dipeptidase 1	FALSE	FALSE	TRUE	FALSE	FALSE	FALSE
20200205_TTNGFP_D4_GATA6ChIP_001_peak_12163	chr16	89706502	89706680	179	*	14.4	+	Distal Intergenic	16	89710839	89713288	2450	2	5119	uc002fnt.4	6608	ENSG00000131165	CHMP1A	charged multivesicular body protein 1A	FALSE	FALSE	FALSE	FALSE	FALSE	FALSE
20200205_TTNGFP_D4_GATA6ChIP_001_peak_12166	chr16	89712842	89712972	131	*	12.1	+	Promoter (<=1kb)	16	89710839	89713288	2450	2	5119	uc002fnt.4	316	ENSG00000131165	CHMP1A	charged multivesicular body protein 1A	FALSE	FALSE	FALSE	FALSE	FALSE	FALSE
20200205_TTNGFP_D4_GATA6ChIP_001_peak_12167	chr16	89715835	89716018	184	*	17.1	+	Promoter (2-3kb)	16	89710839	89713288	2450	2	5119	uc002fnt.4	-2547	ENSG00000131165	CHMP1A	charged multivesicular body protein 1A	FALSE	FALSE	FALSE	FALSE	FALSE	FALSE
20200205_TTNGFP_D4_GATA6ChIP_001_peak_12169	chr16	89736658	89736814	157	*	12.7	+	3' UTR	16	89724455	89736866	12412	1	124045	uc031qxq.1	12203	ENSG00000167523	SPATA33	spermatogenesis associated 33	FALSE	FALSE	FALSE	FALSE	FALSE	FALSE
20200205_TTNGFP_D4_GATA6ChIP_001_peak_1217	chr1	21606623	21606813	191	*	15.7	+	Promoter (<=1kb)	1	21543740	21606183	62444	2	1889	uc001bej.2	-440	ENSG00000117298	ECE1	endothelin converting enzyme 1	FALSE	FALSE	FALSE	FALSE	FALSE	FALSE
20200205_TTNGFP_D4_GATA6ChIP_001_peak_12170	chr16	89774686	89775066	381	*	23.9	+	Promoter (3-4kb)	16	89778264	89784573	6310	1	100128881	uc002fon.1	-3198	ENSG00000261373	VPS9D1-AS1	VPS9D1 antisense RNA 1	FALSE	FALSE	FALSE	FALSE	FALSE	FALSE
20200205_TTNGFP_D4_GATA6ChIP_001_peak_12171	chr16	89776094	89776249	156	*	16.2	+	Promoter (2-3kb)	16	89778264	89784573	6310	1	100128881	uc002fon.1	-2015	ENSG00000261373	VPS9D1-AS1	VPS9D1 antisense RNA 1	FALSE	FALSE	FALSE	FALSE	FALSE	FALSE
20200205_TTNGFP_D4_GATA6ChIP_001_peak_12173	chr16	89784576	89784778	203	*	17.3	+	Promoter (1-2kb)	16	89773541	89786115	12575	2	9605	uc002fol.1	1337	ENSG00000075399	VPS9D1	VPS9 domain containing 1	FALSE	FALSE	FALSE	FALSE	FALSE	FALSE
20200205_TTNGFP_D4_GATA6ChIP_001_peak_12174	chr16	89789985	89790119	135	*	15.6	+	Promoter (<=1kb)	16	89789545	89804654	15110	1	92822	uc010cit.2	440	ENSG00000158805	ZNF276	zinc finger protein 276	FALSE	FALSE	FALSE	FALSE	FALSE	FALSE
20200205_TTNGFP_D4_GATA6ChIP_001_peak_12176	chr16	89798618	89798745	128	*	13.3	+	Intron (uc010ciq.3/92822, intron 6 of 10)	16	89789545	89804654	15110	1	92822	uc010cit.2	9073	ENSG00000158805	ZNF276	zinc finger protein 276	FALSE	FALSE	FALSE	FALSE	FALSE	FALSE
20200205_TTNGFP_D4_GATA6ChIP_001_peak_12177	chr16	89799068	89799320	253	*	18.5	+	Intron (uc010ciq.3/92822, intron 6 of 10)	16	89789545	89804654	15110	1	92822	uc010cit.2	9523	ENSG00000158805	ZNF276	zinc finger protein 276	FALSE	FALSE	FALSE	FALSE	FALSE	FALSE
20200205_TTNGFP_D4_GATA6ChIP_001_peak_12178	chr16	89849115	89849231	117	*	14.8	+	Intron (uc002fou.1/2175, intron 17 of 42)	16	89806149	89831474	25326	2	2175	uc010vpo.2	-17641	ENSG00000187741	FANCA	FA complementation group A	FALSE	FALSE	FALSE	FALSE	FALSE	FALSE
20200205_TTNGFP_D4_GATA6ChIP_001_peak_1218	chr1	21628938	21629083	146	*	15	+	Intron (uc001bem.2/1889, intron 1 of 18)	1	21619783	21626362	6580	1	100506801	uc001beo.2	9155	ENSG00000231105	LOC100506801	uncharacterized LOC100506801	TRUE	FALSE	FALSE	FALSE	FALSE	FALSE
20200205_TTNGFP_D4_GATA6ChIP_001_peak_12181	chr16	89920285	89920431	147	*	17.6	+	Intron (uc010civ.1/84501, intron 4 of 9)	16	89916712	89937727	21016	1	84501	uc010cix.1	3573	ENSG00000204991	SPIRE2	spire type actin nucleation factor 2	FALSE	FALSE	FALSE	FALSE	FALSE	FALSE
20200205_TTNGFP_D4_GATA6ChIP_001_peak_12182	chr16	89921884	89922051	168	*	14.5	+	Exon (uc010civ.1/84501, exon 7 of 10)	16	89916712	89937727	21016	1	84501	uc010cix.1	5172	ENSG00000204991	SPIRE2	spire type actin nucleation factor 2	FALSE	FALSE	FALSE	FALSE	FALSE	FALSE
20200205_TTNGFP_D4_GATA6ChIP_001_peak_12184	chr16	89926135	89926269	135	*	13.8	+	Intron (uc002foz.1/84501, intron 9 of 14)	16	89916712	89937727	21016	1	84501	uc010cix.1	9423	ENSG00000204991	SPIRE2	spire type actin nucleation factor 2	FALSE	FALSE	FALSE	FALSE	FALSE	FALSE
20200205_TTNGFP_D4_GATA6ChIP_001_peak_12187	chr16	89959189	89959365	177	*	23.3	+	Intron (uc002fpb.2/22980, intron 6 of 17)	16	89950990	89977792	26803	1	22980	uc002fpc.2	8199	ENSG00000141002	TCF25	transcription factor 25	FALSE	FALSE	FALSE	FALSE	FALSE	FALSE
20200205_TTNGFP_D4_GATA6ChIP_001_peak_12188	chr16	89962459	89962659	201	*	24.2	+	Exon (uc002fpb.2/22980, exon 9 of 18)	16	89950990	89977792	26803	1	22980	uc002fpc.2	11469	ENSG00000141002	TCF25	transcription factor 25	FALSE	FALSE	FALSE	FALSE	FALSE	FALSE
20200205_TTNGFP_D4_GATA6ChIP_001_peak_12189	chr16	89971361	89971483	123	*	11.7	+	Exon (uc002fpb.2/22980, exon 14 of 18)	16	89984287	89987385	3099	1	4157	uc002fpe.4	-12804	ENSG00000258839	MC1R	melanocortin 1 receptor	FALSE	FALSE	FALSE	FALSE	FALSE	FALSE
20200205_TTNGFP_D4_GATA6ChIP_001_peak_1219	chr1	21634126	21634417	292	*	33.9	+	Intron (uc001bem.2/1889, intron 1 of 18)	1	21619783	21626362	6580	1	100506801	uc001beo.2	14343	ENSG00000231105	LOC100506801	uncharacterized LOC100506801	TRUE	FALSE	FALSE	FALSE	FALSE	TRUE
20200205_TTNGFP_D4_GATA6ChIP_001_peak_12190	chr16	89981995	89982121	127	*	14.4	+	Promoter (2-3kb)	16	89984287	89987385	3099	1	4157	uc002fpe.4	-2166	ENSG00000258839	MC1R	melanocortin 1 receptor	FALSE	FALSE	FALSE	FALSE	FALSE	FALSE
20200205_TTNGFP_D4_GATA6ChIP_001_peak_12193	chr16	89994917	89995043	127	*	11.5	+	Promoter (1-2kb)	16	89996843	90002505	5663	1	10381	uc002fpj.1	-1800	ENSG00000258947	TUBB3	tubulin beta 3 class III	FALSE	FALSE	FALSE	FALSE	FALSE	FALSE
20200205_TTNGFP_D4_GATA6ChIP_001_peak_12194	chr16	90001940	90002271	332	*	18	+	Promoter (1-2kb)	16	90000320	90002505	2186	1	10381	uc002fpk.1	1620	ENSG00000258947	TUBB3	tubulin beta 3 class III	FALSE	FALSE	FALSE	FALSE	FALSE	FALSE
20200205_TTNGFP_D4_GATA6ChIP_001_peak_12195	chr16	90003103	90003649	547	*	41	+	Promoter (2-3kb)	16	90000320	90002505	2186	1	10381	uc002fpk.1	2783	ENSG00000258947	TUBB3	tubulin beta 3 class III	FALSE	FALSE	FALSE	FALSE	FALSE	FALSE
20200205_TTNGFP_D4_GATA6ChIP_001_peak_12196	chr16	90005205	90005341	137	*	17.3	+	Distal Intergenic	16	90000320	90002505	2186	1	10381	uc002fpk.1	4885	ENSG00000258947	TUBB3	tubulin beta 3 class III	FALSE	FALSE	FALSE	FALSE	FALSE	FALSE
20200205_TTNGFP_D4_GATA6ChIP_001_peak_12199	chr16	90021662	90021854	193	*	18.2	+	Exon (uc002fpl.3/54849, exon 4 of 6)	16	90015828	90034468	18641	1	54849	uc010vpr.2	5834	ENSG00000140995	DEF8	differentially expressed in FDCP 8 homolog	TRUE	FALSE	FALSE	FALSE	FALSE	FALSE
20200205_TTNGFP_D4_GATA6ChIP_001_peak_12204	chr16	90066955	90067084	130	*	13.6	+	Promoter (1-2kb)	16	90065014	90067195	2182	1	172	uc002fqd.1	1941	ENSG00000223959	AFG3L1P	AFG3 like matrix AAA peptidase subunit 1, pseudogene	FALSE	FALSE	FALSE	TRUE	FALSE	FALSE
20200205_TTNGFP_D4_GATA6ChIP_001_peak_12205	chr16	90069300	90069460	161	*	15.1	+	Downstream (1-2kb)	16	90065014	90067195	2182	1	172	uc002fqd.1	4286	ENSG00000223959	AFG3L1P	AFG3 like matrix AAA peptidase subunit 1, pseudogene	FALSE	FALSE	FALSE	TRUE	FALSE	FALSE
20200205_TTNGFP_D4_GATA6ChIP_001_peak_12207	chr16	90077351	90077487	137	*	16.2	+	Promoter (<=1kb)	16	90071279	90076529	5251	2	79007	uc002fqe.1	-822	ENSG00000003249	DBNDD1	dysbindin domain containing 1	FALSE	FALSE	FALSE	TRUE	FALSE	FALSE
20200205_TTNGFP_D4_GATA6ChIP_001_peak_12208	chr16	90084809	90084953	145	*	10.1	+	Promoter (<=1kb)	16	90071279	90085937	14659	2	79007	uc002fqf.1	984	ENSG00000003249	DBNDD1	dysbindin domain containing 1	FALSE	FALSE	FALSE	TRUE	FALSE	FALSE
20200205_TTNGFP_D4_GATA6ChIP_001_peak_12209	chr16	90085100	90085222	123	*	9.5	+	Promoter (<=1kb)	16	90071279	90085937	14659	2	79007	uc002fqf.1	715	ENSG00000003249	DBNDD1	dysbindin domain containing 1	FALSE	FALSE	FALSE	TRUE	FALSE	FALSE
20200205_TTNGFP_D4_GATA6ChIP_001_peak_1221	chr1	21647192	21648196	1005	*	122	+	Intron (uc001bem.2/1889, intron 1 of 18)	1	21543740	21672034	128295	2	1889	uc001bem.2	23838	ENSG00000117298	ECE1	endothelin converting enzyme 1	TRUE	FALSE	FALSE	FALSE	TRUE	TRUE
20200205_TTNGFP_D4_GATA6ChIP_001_peak_12210	chr16	90089623	90089780	158	*	12.9	+	Promoter (<=1kb)	16	90089008	90111379	22372	1	2622	uc010vpw.1	615	ENSG00000141013	GAS8	growth arrest specific 8	FALSE	FALSE	FALSE	FALSE	FALSE	FALSE
20200205_TTNGFP_D4_GATA6ChIP_001_peak_12213	chr16	90113356	90113472	117	*	9.4	+	Promoter (<=1kb)	16	90106169	90114033	7865	2	100130015	uc002fql.3	561	ENSG00000222019	URAHP	urate (hydroxyiso-) hydrolase, pseudogene	FALSE	FALSE	FALSE	FALSE	TRUE	TRUE
20200205_TTNGFP_D4_GATA6ChIP_001_peak_12216	chr16	90171143	90171321	179	*	7.6	+	Intron (uc002fqr.2/uc002fqr.2, intron 1 of 8)	16	90127860	90142338	14479	2	11105	uc010cjh.1	-28805	ENSG00000126856	PRDM7	PR/SET domain 7	FALSE	FALSE	FALSE	FALSE	FALSE	FALSE
20200205_TTNGFP_D4_GATA6ChIP_001_peak_12217	chr16	90233576	90233818	243	*	15.1	+	3' UTR	16	90127860	90142338	14479	2	11105	uc010cjh.1	-91238	ENSG00000126856	PRDM7	PR/SET domain 7	FALSE	FALSE	FALSE	FALSE	FALSE	FALSE
20200205_TTNGFP_D4_GATA6ChIP_001_peak_12218	chr17	19653	19845	193	*	17.6	+	Intron (uc010vpx.1/8447, intron 2 of 5)	17	6011	31420	25410	2	8447	uc010vpx.1	11575	ENSG00000272636	DOC2B	double C2 domain beta	FALSE	FALSE	FALSE	TRUE	FALSE	FALSE
20200205_TTNGFP_D4_GATA6ChIP_001_peak_12219	chr17	20000	20154	155	*	13.9	+	Intron (uc010vpx.1/8447, intron 2 of 5)	17	6011	31420	25410	2	8447	uc010vpx.1	11266	ENSG00000272636	DOC2B	double C2 domain beta	FALSE	FALSE	FALSE	TRUE	FALSE	FALSE
20200205_TTNGFP_D4_GATA6ChIP_001_peak_1222	chr1	21653548	21653750	203	*	18.2	+	Intron (uc001bem.2/1889, intron 1 of 18)	1	21543740	21672034	128295	2	1889	uc001bem.2	18284	ENSG00000117298	ECE1	endothelin converting enzyme 1	FALSE	FALSE	FALSE	FALSE	FALSE	TRUE
20200205_TTNGFP_D4_GATA6ChIP_001_peak_12221	chr17	52536	52660	125	*	14.8	+	Distal Intergenic	17	6011	31420	25410	2	8447	uc010vpx.1	-21116	ENSG00000272636	DOC2B	double C2 domain beta	FALSE	FALSE	FALSE	TRUE	FALSE	FALSE
20200205_TTNGFP_D4_GATA6ChIP_001_peak_12222	chr17	64902	65069	168	*	10.1	+	Intron (uc010vpy.2/9501, intron 6 of 6)	17	6011	31420	25410	2	8447	uc010vpx.1	-33482	ENSG00000272636	DOC2B	double C2 domain beta	FALSE	FALSE	FALSE	TRUE	FALSE	FALSE
20200205_TTNGFP_D4_GATA6ChIP_001_peak_12223	chr17	80408	80532	125	*	19.1	+	Intron (uc010vpy.2/9501, intron 5 of 6)	17	6011	31420	25410	2	8447	uc010vpx.1	-48988	ENSG00000272636	DOC2B	double C2 domain beta	FALSE	FALSE	FALSE	TRUE	FALSE	FALSE
20200205_TTNGFP_D4_GATA6ChIP_001_peak_12224	chr17	82294	82462	169	*	16.5	+	Intron (uc010vpy.2/9501, intron 5 of 6)	17	6011	31420	25410	2	8447	uc010vpx.1	-50874	ENSG00000272636	DOC2B	double C2 domain beta	FALSE	FALSE	FALSE	TRUE	FALSE	FALSE
20200205_TTNGFP_D4_GATA6ChIP_001_peak_12226	chr17	139179	139398	220	*	15.3	+	Intron (uc010vpy.2/9501, intron 3 of 6)	17	62180	177370	115191	2	9501	uc010vpy.2	37972	ENSG00000181031	RPH3AL	rabphilin 3A like (without C2 domains)	FALSE	FALSE	FALSE	FALSE	FALSE	FALSE
20200205_TTNGFP_D4_GATA6ChIP_001_peak_1223	chr1	21757418	21757616	199	*	12.6	+	Promoter (8-9kb)	1	21766583	21811393	44811	1	84224	uc001ber.4	-8967	ENSG00000142794	NBPF3	NBPF member 3	FALSE	FALSE	FALSE	FALSE	FALSE	FALSE
20200205_TTNGFP_D4_GATA6ChIP_001_peak_12231	chr17	185804	186110	307	*	23.2	+	Intron (uc002fre.2/9501, intron 1 of 9)	17	180996	183279	2284	1	100506388	uc021tmz.1	4808	ENSG00000262061	LOC100506388	uncharacterized LOC100506388	TRUE	FALSE	FALSE	FALSE	FALSE	FALSE
20200205_TTNGFP_D4_GATA6ChIP_001_peak_12233	chr17	522418	522606	189	*	20.6	+	Intron (uc002frk.3/55275, intron 5 of 16)	17	411908	579647	167740	2	55275	uc002frk.3	57041	ENSG00000141252	VPS53	VPS53 subunit of GARP complex	FALSE	FALSE	FALSE	FALSE	FALSE	FALSE
20200205_TTNGFP_D4_GATA6ChIP_001_peak_12236	chr17	710848	711283	436	*	36	+	Intron (uc010vqd.2/64359, intron 2 of 3)	17	702553	725697	23145	2	64359	uc010vqd.2	14414	ENSG00000167693	NXN	nucleoredoxin	TRUE	FALSE	FALSE	FALSE	FALSE	FALSE
20200205_TTNGFP_D4_GATA6ChIP_001_peak_12239	chr17	828589	828743	155	*	18.6	+	Intron (uc002fsa.3/64359, intron 1 of 7)	17	722368	800254	77887	2	64359	uc002fsb.2	-28335	ENSG00000167693	NXN	nucleoredoxin	TRUE	FALSE	FALSE	FALSE	FALSE	TRUE
20200205_TTNGFP_D4_GATA6ChIP_001_peak_1224	chr1	21866580	21866899	320	*	23.2	+	Intron (uc001bet.3/249, intron 1 of 11)	1	21877772	21904905	27134	1	249	uc001beu.4	-10873	ENSG00000162551	ALPL	alkaline phosphatase, biomineralization associated	TRUE	FALSE	TRUE	FALSE	FALSE	TRUE
20200205_TTNGFP_D4_GATA6ChIP_001_peak_12240	chr17	899698	899909	212	*	21.8	+	Promoter (<=1kb)	17	900357	905390	5034	1	29928	uc002fsc.3	-448	ENSG00000177370	TIMM22	translocase of inner mitochondrial membrane 22	TRUE	FALSE	FALSE	FALSE	FALSE	FALSE
20200205_TTNGFP_D4_GATA6ChIP_001_peak_12241	chr17	908181	908383	203	*	15.7	+	3' UTR	17	906758	915829	9072	2	29	uc002fsf.4	7446	ENSG00000159842	ABR	ABR activator of RhoGEF and GTPase	FALSE	FALSE	FALSE	FALSE	FALSE	TRUE
20200205_TTNGFP_D4_GATA6ChIP_001_peak_12245	chr17	932975	933223	249	*	18.3	+	Promoter (1-2kb)	17	906758	935078	28321	2	29	uc010vqf.3	1855	ENSG00000159842	ABR	ABR activator of RhoGEF and GTPase	FALSE	FALSE	FALSE	FALSE	FALSE	FALSE
20200205_TTNGFP_D4_GATA6ChIP_001_peak_12246	chr17	937434	937658	225	*	17.3	+	Promoter (2-3kb)	17	906758	935078	28321	2	29	uc010vqf.3	-2356	ENSG00000159842	ABR	ABR activator of RhoGEF and GTPase	FALSE	FALSE	FALSE	FALSE	FALSE	FALSE
20200205_TTNGFP_D4_GATA6ChIP_001_peak_12247	chr17	941316	941438	123	*	13.3	+	Promoter (6-7kb)	17	906758	935078	28321	2	29	uc010vqf.3	-6238	ENSG00000159842	ABR	ABR activator of RhoGEF and GTPase	FALSE	FALSE	FALSE	FALSE	FALSE	FALSE
20200205_TTNGFP_D4_GATA6ChIP_001_peak_12248	chr17	944346	944544	199	*	18.3	+	Promoter (9-10kb)	17	906758	935078	28321	2	29	uc010vqf.3	-9268	ENSG00000159842	ABR	ABR activator of RhoGEF and GTPase	FALSE	FALSE	FALSE	FALSE	FALSE	FALSE
20200205_TTNGFP_D4_GATA6ChIP_001_peak_1225	chr1	21867927	21868123	197	*	23.5	+	Promoter (9-10kb)	1	21877772	21904905	27134	1	249	uc001beu.4	-9649	ENSG00000162551	ALPL	alkaline phosphatase, biomineralization associated	FALSE	FALSE	TRUE	FALSE	FALSE	FALSE
20200205_TTNGFP_D4_GATA6ChIP_001_peak_12250	chr17	960254	960505	252	*	18.8	+	Exon (uc010vqg.3/29, exon 8 of 18)	17	906758	982386	75629	2	29	uc010vqg.3	21881	ENSG00000159842	ABR	ABR activator of RhoGEF and GTPase	FALSE	FALSE	FALSE	FALSE	FALSE	FALSE
20200205_TTNGFP_D4_GATA6ChIP_001_peak_12251	chr17	973263	973563	301	*	19.1	+	Exon (uc010vqg.3/29, exon 4 of 18)	17	906758	982386	75629	2	29	uc010vqg.3	8823	ENSG00000159842	ABR	ABR activator of RhoGEF and GTPase	FALSE	FALSE	FALSE	FALSE	FALSE	FALSE
20200205_TTNGFP_D4_GATA6ChIP_001_peak_12253	chr17	981992	982125	134	*	11.7	+	Promoter (<=1kb)	17	906758	982386	75629	2	29	uc010vqg.3	261	ENSG00000159842	ABR	ABR activator of RhoGEF and GTPase	FALSE	FALSE	FALSE	FALSE	FALSE	FALSE
[truncated: 19,328 more rows]

## Sheet: B. GATA6_het_diffPeaks_D4
Supplemental Table 4B: Differentially Regulated GATA6 ChIP-seq peaks in GATA6+/- hIPSCs (Day 4)
[truncated: 6,467 more rows]

[truncated: 3 more sheets: C. GATA6_mis_diffPeaks_D4, D. GATA6_WT_ChIP_D8, GATA6_het_diffPeaks_D8]
