# Supplementary material for: GATA6 mutations in hiPSCs inform mechanisms for maldevelopment of the heart, pancreas, and diaphragm
Source: eLife. 2020 Oct 15;9:e53278. doi: 10.7554/eLife.53278 (PMC7593088; doi:10.7554/eLife.53278)
Supplement: Supplementary file 5. [file elife-53278-supp5.xlsx]

## Sheet: Sheet1
Supplemental Table 5: Differentially expressed genes between day 4 and day 5 WT cells
	baseMean	log2FoldChange	lfcSE	stat	pvalue	padj
AATF	325.904	0.886781	0.16284	5.44571	5.16002e-08	1.17855e-06
ABCA4	46.9552	-1.79265	0.461161	-3.88726	0.000101384	0.0011178
ABCB11	52.2446	2.27788	0.512733	4.44261	8.88721e-06	0.000128065
ABCC1	915.286	0.808577	0.137354	5.88682	3.93692e-09	1.05082e-07
ABCC12	12.7829	3.00938	0.732325	4.10935	3.96771e-05	0.000487465
ABCC6	61.9231	1.91227	0.346649	5.51643	3.4595e-08	8.23304e-07
ABCF1	967.371	0.663809	0.123484	5.37568	7.62923e-08	1.67868e-06
ABCF2	216.454	-2.01558	0.198545	-10.1517	3.255e-24	3.77635e-22
ABCG1	14.0586	-3.52209	0.819778	-4.2964	1.73596e-05	0.00023206
ABCG2	7.07329	-3.66814	1.2333	-2.97425	0.00293709	0.0202404
ABHD15	45.4136	1.05097	0.383113	2.74323	0.00608374	0.0370292
ABHD16A	20.5928	1.81754	0.570632	3.18513	0.00144688	0.0111528
ABHD4	573.022	0.689473	0.133302	5.17226	2.31282e-07	4.56284e-06
ABHD5	96.0635	0.984693	0.270006	3.64693	0.000265393	0.00260032
ABR	964.735	1.53175	0.133572	11.4676	1.91998e-30	3.35078e-28
ABTB2	339.497	0.687345	0.181408	3.78894	0.000151289	0.00158745
AC002480.1	11.1272	2.51876	0.752353	3.34784	0.000814442	0.00683803
AC002546.1	15.2684	-8.33947	1.57927	-5.2806	1.28764e-07	2.70497e-06
AC004706.3	33.6704	3.27591	0.510951	6.41141	1.44178e-10	4.80256e-09
AC004893.2	9.61675	-7.70091	1.66693	-4.61981	3.84092e-06	5.99601e-05
AC004918.1	5.27899	3.30602	1.24466	2.65616	0.00790372	0.0458614
AC004918.3	29.3137	9.11104	1.51693	6.00624	1.89873e-09	5.31828e-08
AC004967.1	3.44343	-5.73702	2.0537	-2.79351	0.00521399	0.0326297
AC004980.1	12.7579	2.48858	0.859784	2.89442	0.00379858	0.0249962
AC004987.2	30.674	3.44929	0.527694	6.53654	6.2959e-11	2.18633e-09
AC005062.1	14.7929	-3.48775	0.955055	-3.65189	0.00026032	0.00255552
AC005077.4	18.9284	-3.04608	0.680101	-4.47887	7.50406e-06	0.000109603
AC005154.1	38.5564	-6.22284	0.825461	-7.53862	4.74958e-14	2.3257e-12
AC005261.1	118.181	5.16607	0.381598	13.538	9.32887e-42	3.07236e-39
AC005261.2	25.3335	-5.56814	0.874166	-6.36966	1.89452e-10	6.21933e-09
AC005261.3	15.8011	2.86575	0.762755	3.75711	0.000171886	0.00177529
AC005261.4	3.50523	-6.16049	2.00835	-3.06744	0.00215902	0.0156385
AC005261.5	36.3197	9.61258	1.50111	6.40363	1.51727e-10	5.0376e-09
AC005332.4	14.1698	4.38254	0.905712	4.83878	1.30639e-06	2.24349e-05
AC005332.6	49.4419	4.39613	0.522665	8.41099	4.06553e-17	2.66071e-15
AC005562.1	4.40754	-6.55529	1.92528	-3.40485	0.000661997	0.00574348
AC005699.1	8.62208	-3.09695	1.04965	-2.95045	0.0031731	0.0215612
AC005726.2	9.87888	-5.86012	1.62221	-3.61243	0.000303342	0.00289978
AC005829.1	9.34282	7.10219	1.65424	4.29333	1.76012e-05	0.000235055
AC005829.2	44.5355	10.0762	1.49346	6.74689	1.51048e-11	5.701e-10
AC005906.2	16.0876	-3.05924	0.798998	-3.82884	0.000128747	0.00137783
AC006305.1	33.1693	-1.83724	0.487651	-3.76753	0.000164872	0.00171324
AC006449.5	7.91497	7.00987	1.68253	4.16627	3.09628e-05	0.000390506
AC006449.6	5.87365	5.23245	1.70931	3.06114	0.00220499	0.0159038
AC006978.1	77.5031	0.914682	0.283819	3.22277	0.00126958	0.00998278
AC007318.1	10.0283	2.90978	0.840835	3.46059	0.000538999	0.0047893
AC007325.2	74.957	1.7181	0.400909	4.2855	1.82327e-05	0.000242695
AC007402.1	4.30544	-6.21509	1.82935	-3.39742	0.000680233	0.00588296
AC007614.1	5.43049	7.10138	1.81163	3.91988	8.8593e-05	0.000996135
AC007743.1	7.74278	2.90475	0.980489	2.96256	0.00305096	0.0208492
AC007969.1	15.3956	3.16794	0.676876	4.68023	2.86554e-06	4.59995e-05
AC008079.1	6.81694	6.89485	1.71642	4.01699	5.89459e-05	0.000693327
AC008443.1	4.65515	-6.63546	1.90479	-3.48357	0.000494775	0.00443495
AC008443.2	25.651	8.69181	1.52403	5.70319	1.17585e-08	2.94598e-07
AC008443.3	5.72512	-6.94068	1.81995	-3.81366	0.000136923	0.00145162
AC008443.6	7.71491	6.02189	1.63032	3.69368	0.000221029	0.00221561
AC008676.2	3.90772	-6.37786	1.99702	-3.19368	0.0014047	0.0108852
AC008676.3	19.7947	7.01373	1.59467	4.39823	1.09136e-05	0.000154218
AC008770.1	7.86964	-7.40791	1.71567	-4.31779	1.57601e-05	0.000212623
AC009041.2	64.2588	-1.69987	0.361894	-4.69714	2.63824e-06	4.27203e-05
AC009055.2	73.7329	-4.07833	0.524069	-7.78204	7.13626e-15	3.71922e-13
AC009133.3	16.2079	-1.82395	0.683838	-2.66723	0.00764792	0.0446563
AC009139.1	10.1456	3.47369	1.02397	3.39238	0.00069288	0.00596455
AC009163.6	6.92243	6.20419	1.76485	3.51541	0.000439076	0.0040114
AC009414.2	4.89822	6.51698	1.7975	3.62559	0.000288301	0.00277549
AC009446.1	22.1861	-3.18779	0.624324	-5.10599	3.29068e-07	6.32698e-06
AC009531.1	4.81098	4.53316	1.32735	3.41521	0.000637331	0.00555902
AC009779.3	2.80411	-5.88057	2.18604	-2.69006	0.00714396	0.0423064
AC010285.3	6.26805	4.9379	1.71224	2.88388	0.00392802	0.0257402
AC010343.1	17.1207	3.82952	0.757473	5.05566	4.28912e-07	8.09422e-06
AC010478.1	162.296	1.82602	0.255076	7.15874	8.1423e-13	3.47819e-11
AC010503.4	18.4291	1.93852	0.716521	2.70545	0.00682111	0.0407371
AC010538.1	12.3154	3.08248	0.908023	3.39471	0.000687004	0.00593148
AC010615.2	143.204	-0.633818	0.240809	-2.63203	0.00848752	0.0486543
AC011476.3	8.52495	3.94289	1.01945	3.86765	0.000109889	0.00119607
AC012676.5	26.9416	5.74428	0.96018	5.9825	2.1974e-09	6.10458e-08
AC013489.1	2.86815	6.00348	2.02358	2.96677	0.00300945	0.0206346
AC015813.1	169.561	-1.1188	0.214156	-5.22424	1.74872e-07	3.55648e-06
AC015849.3	14.8629	7.78258	1.60735	4.84186	1.28629e-06	2.21644e-05
AC015849.4	3.10817	6.01022	2.00677	2.99497	0.00274468	0.0191058
AC015849.5	6.29572	6.78077	1.74063	3.89559	9.79598e-05	0.00108414
AC015922.2	13.4848	4.75195	1.05548	4.50215	6.7268e-06	9.97491e-05
AC015961.1	21.5779	2.13336	0.527738	4.04246	5.28935e-05	0.000629757
AC016205.1	11.8921	-2.26605	0.78753	-2.87741	0.00400954	0.0261711
AC016747.1	24.1838	-1.78081	0.606088	-2.93821	0.00330116	0.0222307
AC017100.1	22.6729	1.64875	0.56276	2.92976	0.00339219	0.0227322
AC018553.2	36.8942	-3.45431	0.669983	-5.15582	2.52527e-07	4.95327e-06
AC018638.8	2.92487	-5.94458	2.15721	-2.75568	0.00585699	0.0359249
AC019155.2	18.3252	1.5421	0.565758	2.72572	0.00641606	0.0385776
AC020656.2	146.445	3.79559	1.11909	3.39169	0.000694639	0.00597717
AC020915.3	73.6397	3.86871	0.398389	9.7109	2.70942e-22	2.73879e-20
AC020915.4	17.1157	-8.54036	1.56886	-5.44368	5.21905e-08	1.18937e-06
AC020916.1	49.2841	1.41745	0.404151	3.50723	0.000452795	0.00410916
AC020978.7	6.47385	6.89821	1.73271	3.98118	6.85753e-05	0.000797857
AC020978.9	7.21855	6.204	1.74608	3.5531	0.000380724	0.00353042
AC022613.1	13.263	3.69238	0.948678	3.89213	9.93669e-05	0.00109734
AC022613.3	3.61191	5.51744	1.95402	2.82363	0.00474834	0.0301387
AC023301.1	59.9316	-2.40505	0.459495	-5.23411	1.65784e-07	3.39533e-06
AC023886.2	5.16433	3.25506	1.18991	2.73556	0.00622738	0.0376761
AC024293.1	34.3777	2.94974	0.483001	6.1071	1.01458e-09	2.98081e-08
AC025594.2	16.6121	-7.00097	1.5571	-4.49617	6.91897e-06	0.000102154
AC026271.3	79.6123	10.617	1.47097	7.21765	5.28948e-13	2.29996e-11
AC026271.4	18.4165	-8.64634	1.56242	-5.53393	3.13136e-08	7.51343e-07
AC026401.3	32.4652	8.33249	1.52169	5.47582	4.35495e-08	1.01165e-06
AC026801.2	8.83009	5.57056	1.62935	3.41888	0.000628789	0.00549155
AC027309.2	4.93463	6.00958	1.82204	3.29827	0.000972825	0.00793929
AC048341.2	26.5255	-1.65483	0.540695	-3.06057	0.00220917	0.0159227
AC064799.1	6.16254	2.96636	1.05744	2.80523	0.00502799	0.0316287
AC064802.1	8.08851	-4.69851	1.32349	-3.5501	0.000385081	0.00356597
AC067750.1	53.4201	0.971138	0.367891	2.63974	0.00829686	0.0478029
AC068473.5	35.0483	7.56761	1.45809	5.19009	2.1019e-07	4.19128e-06
AC068587.4	208.928	3.9771	0.281407	14.1329	2.37975e-45	8.52493e-43
AC068587.6	60.1268	-10.3593	1.48794	-6.96221	3.34984e-12	1.36528e-10
AC068775.1	6.63384	-7.15783	1.7654	-4.0545	5.02417e-05	0.000600635
AC068831.1	2.29766	6.2059	2.08894	2.97083	0.00296995	0.0204393
AC068831.7	63.9518	8.58708	1.43118	5.99999	1.9733e-09	5.50449e-08
AC069120.1	6.42637	2.97485	1.08479	2.74233	0.00610053	0.0370844
AC073861.1	48.9049	-2.00656	0.387429	-5.17918	2.22868e-07	4.40964e-06
AC078842.1	11.5851	-2.46614	0.927629	-2.65854	0.00784799	0.0456157
AC078993.1	69.6724	-1.31112	0.41962	-3.12453	0.00178088	0.0133152
AC079896.1	11.2872	-2.51814	0.820919	-3.06747	0.00215881	0.0156385
AC087481.3	58.6903	6.57849	0.793404	8.29147	1.11854e-16	6.96325e-15
AC087564.1	5.67712	7.35819	1.75775	4.18615	2.83729e-05	0.00036029
AC087623.1	24.7808	9.55587	1.51877	6.29183	3.13752e-10	9.96346e-09
AC090498.1	6.41698	2.68342	1.01346	2.64779	0.00810197	0.0468917
AC090970.2	5.84489	3.97998	1.45884	2.72818	0.00636848	0.0383367
AC091057.1	88.9188	10.4392	1.46995	7.10175	1.23185e-12	5.19693e-11
AC091982.3	5.41256	6.3717	1.78562	3.56835	0.00035924	0.00336174
AC092117.1	59.8926	1.26573	0.380937	3.32267	0.000891607	0.00738569
AC092364.2	3.6588	6.01675	1.98411	3.03247	0.00242558	0.0172451
AC092490.1	200.84	-0.826812	0.243489	-3.39569	0.000684556	0.00591283
AC092902.5	10.7264	5.58124	1.2844	4.3454	1.39023e-05	0.000190901
AC093422.1	6.04501	-5.48515	1.77313	-3.09349	0.0019782	0.0145246
AC093627.5	9.98888	4.48712	1.13669	3.94754	7.89582e-05	0.000905757
AC093724.1	8.46621	6.65712	1.6818	3.95833	7.54747e-05	0.000868725
AC096746.1	12.0017	2.71202	0.920357	2.94671	0.00321179	0.0217734
AC096888.1	39.3885	3.48367	1.10248	3.15985	0.00157852	0.0120403
AC100803.2	33.341	8.68727	1.51147	5.74758	9.05323e-09	2.31362e-07
AC100810.1	41.6617	2.47671	0.466454	5.30966	1.09833e-07	2.34344e-06
AC103810.1	11.1961	3.44431	0.94501	3.64474	0.000267665	0.0026163
AC104257.1	246.456	-3.0091	0.24734	-12.1658	4.72585e-34	9.84665e-32
AC104564.3	2.79799	5.77662	2.09272	2.76034	0.00577417	0.0354702
AC104825.1	26.7327	8.87236	1.5237	5.82291	5.78308e-09	1.51197e-07
AC105105.1	11.6489	-2.6611	0.877226	-3.03354	0.00241701	0.0171962
AC106795.1	79.9808	2.97306	0.33495	8.87611	6.92396e-19	5.23631e-17
AC107220.1	7.31075	3.82154	1.10246	3.46638	0.000527518	0.00470674
AC107294.3	5.38401	-5.3845	1.767	-3.04726	0.00230939	0.0165574
AC108010.1	68.1984	0.967898	0.32535	2.97494	0.00293042	0.0202013
AC109779.1	15.1967	-2.73628	0.751094	-3.64307	0.000269408	0.00263082
AC112220.2	14.1363	2.07836	0.716005	2.90271	0.00369945	0.0244621
AC114490.1	11.1297	-2.87678	0.829579	-3.46775	0.000524833	0.00468791
AC115223.1	18.5762	-2.06265	0.685307	-3.00983	0.00261398	0.0183545
AC115837.1	45.0926	2.2961	0.429025	5.3519	8.7037e-08	1.89873e-06
AC116050.1	3.40169	-6.00459	1.97272	-3.04381	0.00233601	0.0166955
AC116562.4	89.1488	-1.63087	0.373398	-4.36765	1.25593e-05	0.000174573
AC117386.2	3.90446	-5.93315	1.83051	-3.24126	0.00119005	0.00946244
AC117500.2	2.72245	6.20568	2.02035	3.07159	0.00212921	0.015472
AC117503.2	6.75545	6.36272	1.75474	3.62601	0.000287833	0.0027723
AC117503.4	9.92457	3.04546	0.858762	3.54634	0.000390629	0.00361407
AC117945.2	56.3286	-3.00647	0.432867	-6.94548	3.77172e-12	1.52505e-10
AC120036.4	2.12727	5.99613	2.13593	2.80727	0.0049964	0.0314547
AC120049.1	36.962	1.63218	0.503832	3.23953	0.00119726	0.00951608
AC120114.2	4.69184	-6.64756	1.89704	-3.50418	0.000458022	0.0041494
AC120114.3	12.0643	7.44846	1.60769	4.63302	3.60375e-06	5.69102e-05
AC120114.4	2.98636	-5.82226	2.04116	-2.85242	0.00433872	0.0280089
AC125232.1	12.9016	-8.13004	1.61099	-5.0466	4.49742e-07	8.42502e-06
AC125232.2	22.9426	2.7534	0.569667	4.83335	1.34256e-06	2.29788e-05
AC125807.2	213.68	0.911113	0.215038	4.23698	2.26549e-05	0.000294269
AC126544.2	18.7463	8.52256	1.54586	5.51314	3.52487e-08	8.35939e-07
AC127070.4	5.37933	6.37635	1.78651	3.56917	0.000358117	0.00335277
AC129507.4	2.38724	6.01773	2.15649	2.79052	0.00526227	0.0328896
AC131235.1	17.6851	2.89749	0.66033	4.38794	1.14428e-05	0.000160475
AC136632.1	5.4831	3.25848	1.23889	2.63015	0.00853472	0.04887
AC137932.1	38.7057	1.22439	0.42878	2.85552	0.00429663	0.0277723
AC138035.1	23.7554	-2.40934	0.566626	-4.25209	2.11782e-05	0.000277027
AC138392.1	8.47588	2.50583	0.949763	2.63837	0.00833057	0.047916
AC138866.1	19.4893	4.52457	0.935013	4.83904	1.30467e-06	2.24242e-05
AC138866.2	20.2432	6.11708	1.16728	5.24044	1.60197e-07	3.29082e-06
AC138932.3	4.59378	6.52142	1.81719	3.58875	0.000332273	0.00314106
AC138969.2	2.93555	-5.9484	2.17169	-2.73907	0.00616138	0.0373765
AC139495.3	11.6043	2.64181	0.824424	3.20443	0.00135331	0.010531
AC140134.1	9.54695	2.75999	1.04195	2.64887	0.00807617	0.0467689
AC234782.3	5.38829	3.79274	1.33148	2.84852	0.00439238	0.0282749
AC239809.3	13.5024	-1.98036	0.725799	-2.72852	0.00636186	0.0383081
AC241585.2	6.21954	-3.8678	1.36142	-2.84099	0.00449731	0.0288232
AC241952.1	80.3857	-1.20417	0.335342	-3.59088	0.000329569	0.00311838
AC242376.2	35.9158	-1.24498	0.454567	-2.73882	0.00616595	0.0373922
AC243562.3	12.4435	2.30088	0.778462	2.95568	0.00311982	0.0212558
AC243732.1	5.06693	6.22256	1.92554	3.23159	0.00123103	0.00972769
AC243773.2	4.49092	-6.53997	1.88884	-3.46242	0.000535341	0.00476094
AC245884.3	2.50389	5.78448	2.11154	2.73947	0.00615389	0.0373421
AC245884.8	4.60895	6.52143	1.82642	3.57061	0.000356153	0.00333591
AC246787.1	3.27249	6.19951	1.94292	3.19082	0.00141871	0.010973
AC253536.6	3.83088	5.20824	1.97389	2.63856	0.00832581	0.0479022
AC254562.3	7.56992	3.55265	1.23307	2.88115	0.0039623	0.0259398
ACAA2	938.604	0.609669	0.117324	5.19644	2.03137e-07	4.06621e-06
ACAT1	159.069	-0.709326	0.240926	-2.94417	0.00323826	0.0219019
ACBD7	105.266	0.916829	0.281102	3.26156	0.00110802	0.00888986
ACE	41.7008	1.68214	0.483992	3.47556	0.000509782	0.00456545
ACOX2	74.7493	2.21226	0.368943	5.99622	2.01965e-09	5.62609e-08
ACSL1	63.464	1.53986	0.325738	4.7273	2.2753e-06	3.73768e-05
ACSM3	32.9964	1.67761	0.4293	3.90779	9.31457e-05	0.00103931
ACSS3	306.158	-1.60601	0.262371	-6.12114	9.29071e-10	2.74938e-08
ACTA1	51.7248	-1.67455	0.404906	-4.13564	3.53962e-05	0.000441512
ACTA2	262.788	1.90343	0.250898	7.58649	3.28694e-14	1.63299e-12
ACTG1P10	16.0769	-2.59247	0.851309	-3.04528	0.00232465	0.0166201
ACTN2	123.021	2.9746	0.370365	8.03155	9.62462e-16	5.39904e-14
ACTN3	50.2984	-1.3508	0.444086	-3.04175	0.00235206	0.0167926
ACVR1B	695.072	0.739606	0.151083	4.89535	9.81291e-07	1.72882e-05
ACVR2B.AS1	77.7686	2.22933	0.302311	7.37432	1.65192e-13	7.5629e-12
ACVRL1	25.2296	1.65207	0.533656	3.09577	0.00196305	0.0144289
ADA	288.045	-1.51409	0.233324	-6.48919	8.62998e-11	2.93204e-09
ADAM11	105.073	-1.8226	0.274283	-6.64498	3.03259e-11	1.09792e-09
ADAM12	206.797	-3.97897	0.614096	-6.47939	9.20939e-11	3.10821e-09
ADAM28	212.965	-0.971348	0.250154	-3.88299	0.000103178	0.00113329
ADAM33	71.9666	-1.16797	0.337273	-3.46298	0.000534223	0.00475514
ADAM8	49.0485	1.21022	0.413532	2.92653	0.00342764	0.0229021
ADAMTS10	193.117	-1.02	0.230655	-4.42219	9.77054e-06	0.000139319
ADAMTS13	201.707	-0.752742	0.19921	-3.77864	0.000157687	0.00164612
ADAMTS15	118.266	-1.4875	0.304041	-4.89243	9.95985e-07	1.75168e-05
ADAMTS18	144.883	2.79253	0.36539	7.64258	2.12905e-14	1.06552e-12
ADAMTS2	373.9	-0.76115	0.185291	-4.10786	3.99338e-05	0.000489734
ADAMTS20	45.9324	-1.56288	0.411929	-3.79405	0.000148211	0.00155915
ADAP2	7.90016	3.06473	0.910156	3.36726	0.000759197	0.00643796
ADCK2	142.753	1.44843	0.257639	5.62195	1.88809e-08	4.60608e-07
ADCY2	265.627	-1.24262	0.219768	-5.65426	1.5652e-08	3.85523e-07
ADCY5	322.05	-3.09692	0.4966	-6.23624	4.48218e-10	1.38459e-08
ADCY7	251.912	1.08857	0.21849	4.98223	6.28565e-07	1.14903e-05
ADCY8	157.713	-1.7747	0.293225	-6.05236	1.42738e-09	4.08202e-08
ADCY9	186.205	-1.56763	0.28427	-5.51458	3.49605e-08	8.30067e-07
ADCYAP1R1	138.931	-1.375	0.2688	-5.11533	3.13191e-07	6.05019e-06
ADD3	1629.99	1.63108	0.128195	12.7234	4.38121e-37	1.10444e-34
ADGRB2	665.354	-1.89215	0.390805	-4.84166	1.2876e-06	2.21682e-05
ADGRD1	226.305	-1.4059	0.216887	-6.48217	9.04119e-11	3.05649e-09
ADGRF3	23.6696	2.30535	0.599663	3.84441	0.000120841	0.00129797
ADGRF5	10.7762	4.47217	0.869388	5.14405	2.68878e-07	5.24878e-06
ADGRG1	30.7166	1.94635	0.483777	4.02324	5.74021e-05	0.000678688
ADGRG6	458.227	2.89398	0.635494	4.55391	5.26585e-06	7.97651e-05
ADHFE1	39.5507	-1.72779	0.481002	-3.59207	0.000328058	0.00310841
ADI1	134.66	1.67442	0.267835	6.25167	4.06086e-10	1.26124e-08
ADM	282.848	1.54457	0.286823	5.38507	7.24149e-08	1.5968e-06
ADRA1B	70.6251	-1.20809	0.449134	-2.68983	0.00714888	0.042311
AES	1090.95	0.875638	0.222084	3.94281	8.05311e-05	0.000918127
AF107885.2	7.72758	2.63823	0.976977	2.7004	0.00692555	0.0412643
AF131215.6	19.6869	1.56665	0.59019	2.65449	0.00794286	0.0460623
AF228730.5	6.10835	5.78433	1.78828	3.23457	0.00121825	0.00965285
AFF2	228.626	0.775768	0.193113	4.01717	5.89002e-05	0.000693189
AFF3	89.1386	-2.08132	0.405955	-5.12698	2.94425e-07	5.72014e-06
AGER	51.8683	0.970667	0.367263	2.64298	0.00821802	0.0474156
AGGF1	102.636	-0.99774	0.273577	-3.64701	0.000265308	0.00260032
AGK	248.632	1.09485	0.19198	5.70292	1.1777e-08	2.94699e-07
AGL	859.453	0.680511	0.196327	3.4662	0.000527863	0.00470674
AGPAT1	476.532	3.56275	0.162862	21.8759	4.41162e-106	6.92929e-103
AGPAT3	384.212	0.665297	0.207648	3.20396	0.00135549	0.0105439
AGT	7.93847	3.55031	0.996187	3.5639	0.000365379	0.00340981
AGXT	3.23241	3.91822	1.46874	2.66774	0.00763624	0.0446008
AHCTF1	563.878	-0.624722	0.155272	-4.02341	5.73609e-05	0.000678594
AHDC1	974.696	-0.607796	0.156006	-3.89599	9.77979e-05	0.00108318
AHI1	193.186	-0.768239	0.207696	-3.69886	0.000216573	0.00217735
AHNAK	12420.3	0.693194	0.127952	5.41762	6.03972e-08	1.3612e-06
AHR	31.6835	1.75176	0.481639	3.63707	0.000275752	0.00267359
AKT3	528.259	1.83803	0.186304	9.86577	5.85817e-23	6.29568e-21
AL009031.1	95.2664	-3.3803	0.413675	-8.17139	3.04856e-16	1.80344e-14
AL021368.2	21.9502	-7.18661	1.524	-4.71561	2.40985e-06	3.93737e-05
AL021878.2	4.54715	6.00973	1.85585	3.23826	0.0012026	0.00955109
AL031274.1	2.38147	5.7765	2.12202	2.72217	0.00648547	0.0389605
AL031281.2	7.75061	2.6738	0.978779	2.73177	0.00629956	0.0380002
AL031282.1	22.9477	-2.82653	0.598357	-4.72382	2.31455e-06	3.79911e-05
AL032819.2	15.707	2.17903	0.764515	2.8502	0.00436911	0.0281784
AL035411.1	15.7421	6.41311	1.52789	4.19736	2.70041e-05	0.000344839
AL049543.1	2.32394	6.21272	2.19054	2.83616	0.00456596	0.0291807
AL109918.1	209.584	0.662853	0.20189	3.28324	0.00102621	0.00831516
AL117378.1	7.61013	-7.16699	1.69272	-4.23401	2.29557e-05	0.000297797
AL121839.2	5.78245	7.00004	1.76511	3.96578	7.31553e-05	0.000844886
AL133367.1	41.559	1.25405	0.39743	3.1554	0.00160276	0.0122024
AL135960.1	2.23471	6.77987	2.21402	3.06224	0.00219686	0.0158564
AL137847.2	4.04278	6.17084	1.81237	3.40485	0.000662003	0.00574348
AL138756.1	33.571	1.48311	0.455298	3.25744	0.00112422	0.0090057
AL139099.2	2.8314	6.01034	2.06047	2.91697	0.00353446	0.0235158
AL157392.3	188.343	0.651394	0.205122	3.17565	0.00149503	0.011485
AL161911.1	9.31544	-4.43996	1.1754	-3.77742	0.000158463	0.00165337
AL162151.2	15.5485	2.67822	0.691848	3.87111	0.00010834	0.00118173
AL162430.1	30.3672	1.69558	0.45662	3.71332	0.000204556	0.00206978
AL353052.1	4.3605	-6.13783	1.83258	-3.34929	0.000810199	0.00681362
AL353803.1	3.24511	5.53374	2.00315	2.76252	0.00573578	0.035298
AL353803.2	6.28011	5.53189	1.87692	2.94733	0.00320531	0.0217439
AL354892.2	23.7214	5.0348	0.821099	6.13179	8.68963e-10	2.59027e-08
AL354892.3	3.92682	4.15043	1.5755	2.63436	0.00842956	0.0484036
AL357060.1	17.9638	7.10036	1.60251	4.43076	9.39016e-06	0.000134553
AL358613.2	17.6016	-3.77776	0.781037	-4.83685	1.31915e-06	2.2616e-05
AL390334.1	27.8685	-1.66208	0.536873	-3.09584	0.00196254	0.0144289
AL390879.1	16.8867	8.15013	1.56407	5.21085	1.87981e-07	3.79832e-06
AL391005.1	7.24055	-5.5691	1.71813	-3.24136	0.0011896	0.00946244
AL391684.1	66.5117	1.15812	0.335247	3.45454	0.000551231	0.00487889
AL392023.2	2.80904	-5.29668	2.01631	-2.62692	0.00861619	0.0492674
AL450306.1	9.37545	7.2021	1.64855	4.36874	1.24964e-05	0.000174173
AL513523.2	2.90769	6.54339	2.20523	2.96722	0.0030051	0.0206186
AL590652.1	9.67596	2.31209	0.838758	2.75657	0.0058411	0.0358382
AL591742.2	18.9791	-2.50271	0.651283	-3.84274	0.00012167	0.00130551
AL592430.1	13.9061	1.8409	0.698561	2.63528	0.00840688	0.0483005
AL603750.1	32.6286	2.06863	0.463463	4.46342	8.0661e-06	0.000116976
AL627402.1	5.99529	2.90247	1.07902	2.6899	0.00714728	0.042311
AL645608.1	104.05	-7.32056	0.714986	-10.2388	1.32934e-24	1.569e-22
AL645608.2	66.7934	6.61414	0.735431	8.99355	2.39361e-19	1.90175e-17
AL645608.3	22.9445	-6.49143	1.14655	-5.6617	1.49877e-08	3.70053e-07
AL645608.6	10.1722	7.58416	1.6396	4.62562	3.73479e-06	5.8527e-05
AL662795.2	95.8002	10.5388	1.46712	7.1833	6.80482e-13	2.93758e-11
AL928654.3	2.92028	-5.94148	2.15911	-2.75182	0.00592657	0.0362971
AL928654.4	35.9671	9.48431	1.49813	6.33075	2.43966e-10	7.85731e-09
ALAS2	187.349	5.07303	0.271651	18.6748	7.94065e-78	6.23616e-75
ALCAM	336.407	1.21342	0.214037	5.66923	1.43438e-08	3.55877e-07
ALDH1A2	80.3374	-4.98981	0.785677	-6.35097	2.13964e-10	6.9569e-09
ALDH1A3	20.0605	-1.98673	0.596585	-3.33018	0.000867906	0.00722231
ALDH1B1	433.796	-0.744018	0.152193	-4.88866	1.01525e-06	1.77944e-05
ALDH5A1	177.262	1.14588	0.224079	5.11373	3.15851e-07	6.09581e-06
ALDOA	1013.55	-6.58131	0.206873	-31.8132	4.24594e-222	8.66979e-218
ALG13	369.423	-0.692764	0.167378	-4.13891	3.48954e-05	0.000436332
ALG1L6P	49.3388	-1.14407	0.408037	-2.80383	0.00504999	0.0317182
ALOX5	37.5654	4.13429	0.514272	8.03911	9.04968e-16	5.09051e-14
ALPK2	1637.89	-1.94886	0.157666	-12.3607	4.26464e-35	9.46519e-33
ALPK3	2537.41	0.671351	0.149467	4.49163	7.06795e-06	0.000104127
ALPL	1467.36	0.61877	0.128481	4.81605	1.46425e-06	2.4874e-05
AMBN	4.23815	7.84693	1.90673	4.11539	3.86524e-05	0.000476597
AMBP	13.5617	3.07722	0.773737	3.97709	6.97639e-05	0.00080938
AMER1	505.006	0.720644	0.159099	4.52954	5.91132e-06	8.86221e-05
AMER3	124.266	-2.08798	0.276199	-7.5597	4.04e-14	1.98778e-12
AMHR2	136.807	0.764272	0.237801	3.21391	0.00130941	0.0102518
AMIGO2	244.107	-2.28415	0.270163	-8.45471	2.79788e-17	1.87927e-15
AMMECR1	217.682	1.20536	0.202042	5.96587	2.43332e-09	6.71433e-08
AMN	40.6142	1.7908	0.505831	3.54031	0.000399651	0.00368918
AMOT	2116.86	1.76413	0.393344	4.48495	7.29312e-06	0.000107033
AMPH	74.5888	-1.04454	0.338945	-3.08174	0.00205792	0.0150342
ANGPT2	69.9442	-3.39503	0.419037	-8.10198	5.40724e-16	3.11894e-14
ANGPTL4	85.7617	0.844064	0.31399	2.68819	0.00718407	0.0424332
ANK2	384.734	-0.654465	0.186436	-3.5104	0.000447435	0.00406775
ANK3	1454.14	1.15913	0.134187	8.63818	5.71142e-18	4.09198e-16
ANKDD1B	12.0923	2.93233	0.852351	3.44029	0.000581093	0.00510777
ANKH	330.899	0.693133	0.17178	4.03501	5.46e-05	0.000648185
ANKMY1	127.879	1.14416	0.240614	4.75517	1.98278e-06	3.29693e-05
ANKRD18A	26.1826	-1.62322	0.563857	-2.87878	0.00399218	0.0260852
ANKRD20A5P	18.0554	-3.73308	0.930484	-4.01198	6.02126e-05	0.000706618
ANKRD30B	2.83269	-5.69446	2.05832	-2.76657	0.00566502	0.0349797
ANKRD36BP2	3.59564	-4.91212	1.86129	-2.6391	0.0083126	0.0478515
ANKRD50	624.869	-0.796197	0.176769	-4.50417	6.66335e-06	9.888e-05
ANKRD55	13.4042	2.74102	0.866364	3.16382	0.00155714	0.0118861
ANKRD63	43.1841	-1.36729	0.445627	-3.06823	0.00215329	0.0156081
ANKS4B	22.6238	3.17998	0.718935	4.42318	9.7258e-06	0.000138778
ANO6	1109.7	0.6314	0.127276	4.96088	7.01743e-07	1.27481e-05
ANOS1	340.16	-1.47253	0.202637	-7.26682	3.68037e-13	1.62416e-11
ANPEP	258.581	-3.29072	0.318429	-10.3343	4.93191e-25	5.85492e-23
ANTXR2	328.607	0.768353	0.18516	4.14966	3.32965e-05	0.000418131
ANXA2	1413.89	0.607116	0.119475	5.08155	3.74377e-07	7.11769e-06
ANXA3	347.585	2.00911	0.612325	3.28112	0.00103398	0.00836177
ANXA9	21.4756	1.81571	0.56643	3.20553	0.00134814	0.0104987
AOX1	61.822	-1.64519	0.354268	-4.64393	3.41846e-06	5.4278e-05
AP000344.1	3.40514	6.53154	1.9621	3.32886	0.000872022	0.00724697
AP000344.2	5.27637	6.37189	1.83882	3.46521	0.000529808	0.0047179
AP000350.6	26.9546	7.37637	1.4731	5.00738	5.51763e-07	1.02043e-05
AP000350.7	2.19394	5.79263	2.16499	2.67559	0.00745968	0.0438708
AP000553.1	21.0486	2.06023	0.762456	2.7021	0.00689039	0.0410788
AP000688.2	11.052	-2.39868	0.819556	-2.92681	0.00342462	0.0228895
AP000943.2	49.8265	-2.46713	0.486319	-5.07307	3.91447e-07	7.42841e-06
AP001528.2	81.385	2.57365	0.313244	8.21612	2.10198e-16	1.26983e-14
AP001528.3	112.965	2.82584	0.288233	9.80402	1.08197e-22	1.13296e-20
AP001636.3	32.4666	2.60992	0.495776	5.26431	1.40717e-07	2.92895e-06
AP002360.2	8.12029	-3.58447	1.07946	-3.32061	0.000898224	0.00741943
AP002884.3	3.48564	-6.07871	1.96021	-3.10105	0.00192837	0.0142201
AP006284.1	23.2318	2.94791	0.668557	4.40937	1.03671e-05	0.000147106
AP2A2	807.477	1.11766	0.128899	8.67081	4.29059e-18	3.09575e-16
AP3B2	206.752	-0.937973	0.235679	-3.97987	6.89515e-05	0.000801321
APBA1	44.3685	2.98106	0.481083	6.19657	5.77083e-10	1.7561e-08
APBA2	224.085	1.74128	0.194077	8.97216	2.90764e-19	2.26607e-17
APBB1	828.619	0.727792	0.120065	6.06163	1.3475e-09	3.8644e-08
APCDD1	44.5957	1.31218	0.448059	2.92858	0.0034051	0.0227984
APCDD1L	221.827	-0.687036	0.250316	-2.74468	0.00605703	0.0368859
APELA	520.686	2.28111	0.211663	10.7771	4.41634e-27	5.89394e-25
APEX2	562.843	1.16688	0.174071	6.7035	2.03481e-11	7.51334e-10
APH1B	189.347	0.661837	0.212677	3.11193	0.00185869	0.0138211
APLN	18.8071	4.8258	0.75443	6.39662	1.58852e-10	5.25707e-09
APLNR	3438.63	-1.78914	0.183434	-9.75356	1.7811e-22	1.81841e-20
APOA1	207.287	3.94851	0.696974	5.66522	1.46835e-08	3.63861e-07
APOA2	19.2166	2.52253	0.673336	3.74631	0.000179454	0.0018432
APOB	194.663	2.53771	0.892721	2.84267	0.00447369	0.0286988
APOBEC3B	24.6507	-1.85752	0.5917	-3.13929	0.00169358	0.0127628
APOBEC3F	70.3456	1.01491	0.346025	2.93306	0.0033564	0.0225442
APOM	22.7611	3.41915	0.563426	6.0685	1.2911e-09	3.72358e-08
APPL1	849.022	0.828851	0.119505	6.93572	4.04144e-12	1.63087e-10
APPL2	381.418	0.605176	0.160246	3.77655	0.000159015	0.00165829
AQP7	6.49044	2.86819	1.03862	2.76154	0.00575294	0.035393
ARHGAP11A	368.375	1.04317	0.180743	5.77154	7.85483e-09	2.02e-07
ARHGAP11B	10.8436	-7.74283	1.61653	-4.78978	1.66968e-06	2.81065e-05
ARHGAP18	71.2752	2.32032	0.356519	6.50826	7.6025e-11	2.609e-09
ARHGAP20	3.76989	-5.86274	1.97904	-2.96242	0.00305232	0.0208516
ARHGAP23	262.949	1.73203	0.178715	9.69156	3.27488e-22	3.27793e-20
ARHGAP27	102.343	2.12881	0.295234	7.21061	5.57024e-13	2.41483e-11
ARHGAP28	768.326	1.48605	0.127791	11.6288	2.94234e-31	5.46178e-29
ARHGAP31	201.036	0.594634	0.209438	2.83918	0.00452289	0.0289508
ARHGAP40	163.16	-1.90969	0.710179	-2.68903	0.00716601	0.0423923
ARHGAP42	1172.59	1.17133	0.14548	8.05153	8.17686e-16	4.62502e-14
ARHGAP5	567.725	-0.86835	0.163836	-5.30012	1.15727e-07	2.45382e-06
ARHGAP6	280.942	0.602646	0.207471	2.90472	0.0036758	0.0243137
ARHGEF10	44.3637	5.33825	0.668422	7.98635	1.3899e-15	7.62914e-14
ARHGEF10L	436.301	-0.651893	0.146015	-4.46458	8.02269e-06	0.000116429
ARHGEF15	97.8907	1.22247	0.300689	4.06556	4.79176e-05	0.000576904
ARHGEF19	279.653	1.13637	0.267135	4.25394	2.10044e-05	0.000275282
ARHGEF26	139.219	2.13917	0.248881	8.59514	8.31658e-18	5.79578e-16
ARHGEF28	19.2437	2.31025	0.66779	3.45955	0.000541083	0.00479739
ARHGEF37	9.52936	2.19389	0.798099	2.7489	0.0059796	0.0364906
ARHGEF6	73.37	-1.26672	0.350279	-3.61634	0.000298803	0.0028631
ARL17A	28.0452	5.02215	0.875774	5.73453	9.77854e-09	2.48653e-07
ARL17B	16.2046	4.88707	0.897406	5.44578	5.158e-08	1.17855e-06
ARMC4	29.2567	-1.56608	0.508917	-3.07728	0.00208898	0.015223
ARRDC3	436.004	0.603765	0.149807	4.0303	5.5706e-05	0.000660163
ARSE	211.942	1.02574	0.288813	3.55158	0.000382924	0.00354921
ARSG	61.5508	1.85895	0.331837	5.60198	2.11912e-08	5.1451e-07
ARSI	73.2721	-1.7836	0.334345	-5.33462	9.57455e-08	2.071e-06
ARVCF	436.735	-0.79991	0.1483	-5.39387	6.89572e-08	1.53214e-06
ASPM	899.283	-0.759454	0.204773	-3.70876	0.000208273	0.00210115
ASRGL1	145.86	0.808587	0.238289	3.3933	0.000690569	0.00594801
ASS1	609.097	-0.918082	0.146873	-6.25086	4.08212e-10	1.26484e-08
ASTN1	279.927	-0.615383	0.225164	-2.73305	0.00627514	0.0379118
ATAT1	196.691	1.20602	0.204994	5.8832	4.02411e-09	1.07269e-07
ATCAY	55.4334	-2.45887	0.439526	-5.59438	2.21409e-08	5.3693e-07
ATF6B	280.805	1.07544	0.183146	5.87205	4.3044e-09	1.13997e-07
ATG16L2	226.323	-0.635064	0.236357	-2.68688	0.00721219	0.0425869
ATG9B	31.2711	1.68638	0.443673	3.80095	0.000144142	0.00152026
ATL2	839.589	-0.789907	0.146524	-5.39099	7.00712e-08	1.55351e-06
ATOH8	38.6553	-1.75912	0.528724	-3.32711	0.000877522	0.00728083
ATP10B	16.8465	3.64636	0.898694	4.0574	4.96229e-05	0.000593933
ATP11B	818.194	-0.872153	0.194456	-4.48509	7.28832e-06	0.000107033
ATP13A4	17.4076	2.44994	0.603243	4.06129	4.88022e-05	0.000585483
ATP1A1	3735.21	0.819772	0.125182	6.54865	5.80587e-11	2.0265e-09
ATP1A2	257.322	-2.12242	0.317962	-6.67508	2.47094e-11	9.00965e-10
ATP1A3	10.1794	-7.69426	1.6578	-4.64126	3.46297e-06	5.48569e-05
ATP2B1	1660.5	0.971562	0.159475	6.09226	1.1133e-09	3.2475e-08
ATP2B1.AS1	23.2985	2.10816	0.601268	3.50618	0.000454584	0.00412173
ATP6V0E2	74.654	1.06704	0.394449	2.70514	0.00682763	0.0407522
ATP6V1G2	19.4731	4.05193	0.870882	4.65267	3.27662e-06	5.21883e-05
ATP7B	700.075	0.764691	0.197895	3.86413	0.000111487	0.00120895
ATP8A1	276.09	0.975425	0.270707	3.60326	0.000314255	0.0029915
ATP8B3	147.325	-1.36149	0.23279	-5.84857	4.95808e-09	1.30463e-07
ATRIP	124.232	5.86102	0.431094	13.5957	4.24723e-42	1.42171e-39
ATRX	1218.21	-0.68972	0.183165	-3.76558	0.000166166	0.00172581
ATXN3	181.888	-0.71768	0.224634	-3.19488	0.00139888	0.0108525
ATXN7	69.061	-7.0821	0.788318	-8.9838	2.61562e-19	2.066e-17
AXIN2	100.434	-1.05671	0.291641	-3.62334	0.000290823	0.00279188
AZIN1.AS1	31.3274	1.3382	0.467975	2.85957	0.0042422	0.0274553
AZU1	15.1701	3.53808	0.751438	4.70841	2.49661e-06	4.0685e-05
B3GALNT2	197.793	-0.614042	0.196113	-3.13107	0.00174172	0.01307
B3GALT4	13.6153	6.62493	1.5416	4.29743	1.72792e-05	0.000231209
B3GALT5	98.034	-1.27215	0.279541	-4.55085	5.34304e-06	8.08144e-05
B3GAT2	16.658	-3.7775	0.804904	-4.6931	2.69093e-06	4.34356e-05
B3GLCT	164.079	-0.924016	0.22852	-4.04347	5.26651e-05	0.000627403
B4GALT1	1101.13	1.1517	0.172592	6.67294	2.50733e-11	9.10981e-10
B4GALT4	524.573	0.839767	0.183983	4.56437	5.00992e-06	7.63414e-05
B4GALT6	346.134	1.56793	0.188865	8.30189	1.02472e-16	6.39872e-15
B4GALT7	220.556	0.605433	0.186617	3.24425	0.0011776	0.00938905
BAALC	229.646	-1.68784	0.284967	-5.92291	3.16296e-09	8.57696e-08
BACE1.AS	85.5364	2.09186	0.304088	6.87913	6.02182e-12	2.38756e-10
BAG6	3203.61	0.944485	0.102185	9.24285	2.40007e-20	2.07657e-18
BAMBI	1354.67	1.16248	0.215223	5.40129	6.61617e-08	1.47484e-06
BASP1	493.051	0.966291	0.158574	6.09363	1.10377e-09	3.22431e-08
BBS9	178.37	-0.641799	0.228423	-2.80969	0.00495888	0.031271
BCAM	1233.34	0.777666	0.207973	3.73927	0.000184554	0.00188893
BCAP31	515.997	0.608423	0.157388	3.86575	0.000110747	0.00120284
BCAR3	212.005	-0.640377	0.241963	-2.6466	0.00813066	0.0470178
BCAT1	1989.35	-1.5116	0.120938	-12.499	7.55977e-36	1.71514e-33
BCHE	11.4057	-4.51972	1.22674	-3.68433	0.000229307	0.00228736
BCL2L1	484.888	1.01604	0.192971	5.26525	1.39997e-07	2.91693e-06
BCL6	131.959	2.1005	0.243815	8.61514	6.98545e-18	4.90158e-16
BCL6B	27.8398	1.37022	0.454697	3.01347	0.00258277	0.0181718
BCO1	11.2496	6.08297	1.14894	5.29443	1.19387e-07	2.52095e-06
BCR	2289.6	0.72905	0.12617	5.77834	7.54425e-09	1.94257e-07
BDP1	423.494	0.988422	0.195331	5.06024	4.18728e-07	7.90935e-06
BEND3	209.156	-0.64	0.207643	-3.08222	0.00205463	0.015021
BFAR	350.259	2.01734	0.173263	11.6432	2.48486e-31	4.6549e-29
BGN	169.384	-2.06567	0.258056	-8.00472	1.1974e-15	6.64395e-14
BHLHE40	13.2663	-4.2763	1.04619	-4.08749	4.36073e-05	0.00052938
BICD1	331.695	0.604181	0.175178	3.44897	0.000562737	0.00496351
BMF	969.995	1.50027	0.138349	10.8441	2.12733e-27	2.95497e-25
BMP2	1824.65	1.01027	0.15496	6.51952	7.05315e-11	2.43274e-09
BMP2K	222.729	0.847263	0.20875	4.05875	4.93369e-05	0.000590857
BMP5	220.507	1.67363	0.218785	7.64968	2.01472e-14	1.01078e-12
BMPER	2913.46	-0.891393	0.143053	-6.23121	4.62858e-10	1.42766e-08
BMPR1B	25.4282	-1.76657	0.613902	-2.87761	0.00400705	0.0261711
BNC1	328.304	0.712558	0.199788	3.56657	0.00036168	0.00338077
BOC	1357.34	-0.917845	0.176092	-5.2123	1.86518e-07	3.77829e-06
BOK	342.959	-0.836042	0.166973	-5.00705	5.52716e-07	1.02043e-05
BOP1	349.011	-0.69847	0.159891	-4.36841	1.25154e-05	0.00017432
BPNT1	122.294	1.12398	0.265875	4.22745	2.3635e-05	0.000305638
BRCA2	287.345	-0.79116	0.233275	-3.39154	0.000695011	0.00597785
BRD2	1624.07	1.31667	0.110868	11.876	1.57715e-32	3.0381e-30
BRINP1	281.655	-2.04986	0.228572	-8.96811	3.0165e-19	2.3243e-17
BRIP1	252.229	-0.785914	0.183742	-4.27727	1.89202e-05	0.000250864
BRSK2	40.3009	-1.27781	0.41115	-3.10789	0.00188427	0.0139655
BTBD11	23.49	-1.67671	0.531896	-3.15233	0.00161971	0.0123131
BTBD7	681.484	2.87106	0.136622	21.0146	4.81781e-98	6.55833e-95
BTBD8	54.1672	6.13644	0.728416	8.42435	3.62752e-17	2.3971e-15
BTG2	430.705	0.668963	0.151201	4.42433	9.67404e-06	0.000138232
BTG3.AS1	9.26741	5.56125	1.60778	3.45896	0.000542268	0.0048058
BX284668.2	32.0234	2.24385	0.54444	4.12139	3.76591e-05	0.000465755
BX322557.1	27.6345	-9.22675	1.52143	-6.06451	1.32358e-09	3.80649e-08
BX890604.1	13.3922	-8.18365	1.60372	-5.10292	3.34457e-07	6.41849e-06
BX890604.2	138.878	11.2563	1.46366	7.6905	1.46562e-14	7.42591e-13
BZW1	814.012	-0.713482	0.137702	-5.18136	2.2027e-07	4.37518e-06
C10orf71	47.8035	-4.66733	0.576189	-8.10034	5.4807e-16	3.14355e-14
C10orf82	135.518	0.915555	0.294031	3.11381	0.00184689	0.0137433
C11orf45	21.9173	-3.09514	0.670157	-4.61853	3.86475e-06	6.024e-05
C12orf49	714.404	0.603141	0.154292	3.9091	9.26425e-05	0.00103575
C12orf75	236.064	1.31039	0.239878	5.46275	4.68818e-08	1.07923e-06
C13orf42	39.263	-1.71786	0.432174	-3.97493	7.04001e-05	0.000816297
C14orf119	373.418	-0.627973	0.197717	-3.17613	0.00149255	0.0114702
C16orf45	153.112	2.5245	0.256217	9.85298	6.65422e-23	7.11374e-21
C16orf54	21.713	-2.14489	0.61016	-3.51528	0.000439283	0.0040115
C18orf54	511.526	-1.30846	0.254342	-5.14447	2.68272e-07	5.24699e-06
C1orf115	105.489	2.33595	0.338922	6.89231	5.48938e-12	2.18921e-10
C1orf116	11.0763	2.00449	0.746524	2.6851	0.00725091	0.0427909
C1orf210	33.8927	1.95978	0.509503	3.84646	0.000119839	0.00128925
C1orf216	193.668	-0.792585	0.205847	-3.85036	0.000117943	0.00127153
C1orf50	55.0771	3.20956	0.400124	8.02142	1.04531e-15	5.83173e-14
C1S	20.6199	-1.68238	0.60339	-2.78821	0.00530008	0.0330652
C2orf72	57.2745	2.29726	0.347507	6.61068	3.82553e-11	1.37012e-09
C3	69.0813	-5.45533	0.522242	-10.446	1.52872e-25	1.90335e-23
C3orf58	401.339	-1.08761	0.190631	-5.70528	1.16153e-08	2.91726e-07
C3orf80	8.56213	2.63581	0.846059	3.1154	0.00183697	0.0136794
C4orf36	6.02348	-5.35508	1.72182	-3.11014	0.00187	0.01389
C5orf30	154.758	-0.736369	0.245095	-3.00443	0.00266082	0.0186194
C6orf136	42.7067	1.23827	0.389014	3.1831	0.00145709	0.0112146
C6orf47	88.3586	8.04085	1.06022	7.58417	3.34625e-14	1.65843e-12
C8orf49	34.9457	1.72546	0.448566	3.8466	0.000119769	0.00128917
C9orf64	19.5194	-3.11088	0.695441	-4.47324	7.70414e-06	0.000112125
CA4	30.6609	1.53443	0.51509	2.97896	0.00289227	0.0199788
CAB39L	155.54	0.657271	0.225051	2.92054	0.00349431	0.0232639
CACNA1A	112.217	-0.750933	0.264379	-2.84036	0.00450625	0.0288623
CACNA1B	83.2287	-1.32948	0.309445	-4.29632	1.73656e-05	0.00023206
CACNA1G	198.811	-1.69818	0.260586	-6.51679	7.18261e-11	2.47322e-09
CACNB3	365.564	1.18681	0.16025	7.40599	1.30174e-13	6.02726e-12
CACNG7	207.531	-1.30532	0.247985	-5.26371	1.41174e-07	2.93164e-06
CAD	1503.22	-0.591852	0.107048	-5.52886	3.22323e-08	7.69768e-07
CADM1	2315.31	-1.43175	0.199567	-7.1743	7.26804e-13	3.12413e-11
CADM4	147.396	0.764477	0.238156	3.20999	0.0013274	0.0103637
CALB1	129.361	-0.897084	0.297422	-3.0162	0.00255966	0.0180538
CALB2	40.0669	-1.80356	0.430874	-4.18581	2.84156e-05	0.000360607
CALD1	1497.78	1.11871	0.123125	9.08595	1.02801e-19	8.36289e-18
CALM3	4944.43	0.649297	0.0963077	6.7419	1.56333e-11	5.8896e-10
CAMK2D	777.988	1.22384	0.16829	7.2722	3.53683e-13	1.56997e-11
CAMK2N1	91.6598	1.54682	0.366025	4.22598	2.37902e-05	0.000307451
CAMKV	25.9417	-3.66898	0.654093	-5.60926	2.03193e-08	4.95106e-07
CAMSAP3	324.859	0.768523	0.218536	3.51668	0.000436977	0.00399434
CAPG	247.473	-0.639121	0.18264	-3.49934	0.000466404	0.00421394
CAPN1	1255.16	0.808126	0.133914	6.03465	1.59305e-09	4.53674e-08
CAPRIN2	402.07	-0.598686	0.165484	-3.61778	0.000297136	0.0028498
CARMIL1	411.829	0.829246	0.18877	4.39289	1.11852e-05	0.000157446
CARMN	49.3092	-1.63613	0.516992	-3.16471	0.00155236	0.0118584
CAST	664.465	-1.1257	0.207761	-5.41827	6.01791e-08	1.35779e-06
CAVIN1	224.874	0.726244	0.195981	3.70568	0.000210824	0.00212479
CAVIN3	33.5777	-2.17202	0.496645	-4.37339	1.22333e-05	0.000170739
CBLN1	28.4807	-3.0063	0.552104	-5.44516	5.17594e-08	1.18087e-06
CBR1	114.005	-1.44885	0.265648	-5.454	4.92487e-08	1.1299e-06
CBX6	181.356	-0.643319	0.227545	-2.82722	0.00469545	0.0298402
CBX7	172.556	1.03745	0.218957	4.73814	2.15684e-06	3.56026e-05
CCDC3	543.703	-1.31534	0.24327	-5.40694	6.41121e-08	1.43385e-06
CCDC39	8.92479	-5.88657	1.6431	-3.5826	0.000340188	0.00320697
CCDC71L	116.319	0.696502	0.244379	2.85009	0.00437063	0.0281793
CCDC80	406.575	3.07591	0.697119	4.41231	1.02274e-05	0.000145325
CCDC88A	850.093	-0.981657	0.183909	-5.33773	9.41181e-08	2.04012e-06
CCDC92	345.554	4.06899	0.201518	20.1917	1.15734e-90	1.07417e-87
CCHCR1	313.935	0.927748	0.176778	5.24808	1.53691e-07	3.17955e-06
CCM2L	31.1966	1.20862	0.457444	2.64212	0.00823893	0.047496
CCNB1IP1	1128.64	-0.686524	0.113937	-6.02548	1.68611e-09	4.76852e-08
CCND1	579.114	-1.25517	0.150259	-8.35337	6.63437e-17	4.27341e-15
CCNG1	3079.64	-0.682028	0.124351	-5.48469	4.14187e-08	9.65443e-07
CD163	16.6365	2.04908	0.766409	2.6736	0.00750408	0.0440051
CD163L1	4.75087	-4.91807	1.82366	-2.69682	0.00700061	0.0416144
CD177	8.40448	-5.68826	1.66201	-3.42251	0.000620454	0.0054234
CD1D	7.61588	-4.10034	1.30066	-3.1525	0.00161877	0.0123105
CD24	3152.52	1.16898	0.178198	6.55999	5.38129e-11	1.88798e-09
CD24P4	6.32276	3.29826	1.15274	2.86123	0.00421996	0.0273287
CD300E	10.5699	3.9764	0.977309	4.06872	4.72722e-05	0.00057048
CD34	105.457	3.99731	0.434676	9.19606	3.71324e-20	3.15919e-18
CD37	174.316	-0.637689	0.23187	-2.7502	0.00595593	0.0363858
CD82	209.966	-1.70833	0.388502	-4.39722	1.09644e-05	0.000154829
CD93	11.4754	3.6823	0.804972	4.57444	4.77493e-06	7.31428e-05
CD99	945.506	0.85059	0.147066	5.78374	7.30573e-09	1.88591e-07
CDA	17.3037	-1.94565	0.631284	-3.08204	0.00205585	0.0150245
CDC20B	17.8214	2.34115	0.75374	3.10605	0.00189606	0.0140274
CDC42	211.494	-6.87781	0.432817	-15.8908	7.33867e-57	3.94338e-54
CDC42EP2	15.7739	-8.40995	1.57593	-5.3365	9.47598e-08	2.05186e-06
CDCA7	474.244	-0.759467	0.159266	-4.76856	1.8555e-06	3.09286e-05
CDH11	1909.37	-3.046	0.343677	-8.86297	7.79119e-19	5.82741e-17
CDH13	122.43	1.40561	0.297284	4.72816	2.26559e-06	3.72579e-05
CDH2	4067.7	1.28605	0.298665	4.306	1.66234e-05	0.000223165
CDH22	57.903	-5.00375	0.569759	-8.78221	1.60287e-18	1.1773e-16
CDH23	126.729	-2.00996	0.318881	-6.30315	2.91659e-10	9.30529e-09
CDH24	711.37	-1.37418	0.15079	-9.11322	7.99739e-20	6.58463e-18
CDH3	2062.53	0.893862	0.149333	5.9857	2.15466e-09	5.99402e-08
CDH5	74.2851	6.22946	0.46369	13.4346	3.79325e-41	1.15604e-38
CDHR5	16.3184	2.12307	0.758184	2.8002	0.00510709	0.0320472
CDIP1	561.797	3.55457	0.154628	22.9879	6.15824e-117	1.25745e-113
CDK5R1	83.8944	-1.03935	0.290589	-3.57671	0.000347947	0.00327105
CDK6	2795.18	0.747853	0.109514	6.82881	8.56189e-12	3.33636e-10
CDKN1A	181.464	-0.755243	0.252698	-2.98872	0.00280152	0.0194308
CDKN1C	191.239	3.06995	0.227683	13.4835	1.95701e-41	6.24377e-39
CDKN2C	4.18505	5.20795	1.95127	2.66901	0.00760751	0.0444839
CEBPA	18.1395	2.88585	0.615553	4.68823	2.75582e-06	4.44128e-05
CELF4	36.9954	2.74692	0.476588	5.76372	8.22796e-09	2.11329e-07
CELSR1	859.596	0.662427	0.156934	4.22106	2.43153e-05	0.000313246
CELSR2	1261.74	1.09413	0.158979	6.88225	5.89155e-12	2.34046e-10
CENPBD1	80.5845	1.28909	0.302701	4.25864	2.05678e-05	0.000270427
CENPO	279.131	-0.610001	0.196659	-3.10182	0.00192333	0.0141931
CENPT	273.795	-0.58095	0.192087	-3.02442	0.00249114	0.0176314
CEP170	449.948	1.2132	0.211435	5.73791	9.58503e-09	2.44036e-07
CER1	41.0795	-4.89946	0.619616	-7.90725	2.6313e-15	1.4102e-13
CERS6	929.974	1.09847	0.156787	7.00614	2.4498e-12	1.01056e-10
CFAP221	25.489	1.86119	0.57368	3.24431	0.00117737	0.00938905
CFC1	313.491	-1.45921	0.270045	-5.40357	6.53267e-08	1.45942e-06
CFC1B	20.8985	-7.27954	1.5532	-4.68679	2.77518e-06	4.46896e-05
CGN	764.647	1.58494	0.394203	4.02063	5.80438e-05	0.000685085
CHCHD10	130.463	0.868146	0.262382	3.30871	0.000937272	0.00768909
CHCHD3P3	9.22208	5.77995	1.61811	3.57204	0.000354215	0.00331928
CHD4	1173.39	-4.43886	0.158876	-27.9392	8.91249e-172	3.63968e-168
CHML	355.206	-0.835192	0.18654	-4.47727	7.56028e-06	0.000110345
CHMP1B	257.864	0.706302	0.175768	4.01839	5.85978e-05	0.000690806
CHN2	13.9885	-2.99173	0.803803	-3.72197	0.000197672	0.00200809
CHRD	282.548	-0.670626	0.189878	-3.53188	0.000412609	0.00379337
CHRM4	16.1391	-3.52152	0.856791	-4.11013	3.9544e-05	0.000486122
CHRNA3	105.827	-2.20063	0.445057	-4.9446	7.63019e-07	1.3727e-05
CHRNB4	159.135	-3.09677	0.671868	-4.60919	4.04245e-06	6.26273e-05
CHST11	377.976	-0.70845	0.171372	-4.13399	3.56526e-05	0.000444168
CHST13	29.4553	2.4581	0.586357	4.19217	2.76304e-05	0.000352395
CHST14	588.306	0.67132	0.134689	4.98423	6.22095e-07	1.13924e-05
CHST2	97.9831	-1.60482	0.293443	-5.46893	4.52749e-08	1.04578e-06
CHST3	467.073	1.81834	0.192919	9.42539	4.28515e-21	3.94137e-19
CHST4	9.8059	-3.82048	1.18417	-3.22628	0.0012541	0.00987941
CHST8	58.3085	1.24978	0.420378	2.97299	0.00294917	0.0203168
CKB	1614.12	0.935881	0.144782	6.46407	1.01927e-10	3.42874e-09
CLCN4	122.745	-0.82142	0.26691	-3.07751	0.00208735	0.0152166
CLDN19	414.34	1.50272	0.175673	8.55409	1.18806e-17	8.1406e-16
CLDN3	227.384	1.51	0.350258	4.31109	1.62452e-05	0.000218518
CLDN4	233.486	1.75642	0.259825	6.76001	1.37978e-11	5.25629e-10
CLDN7	216.574	0.876254	0.304529	2.87741	0.00400958	0.0261711
CLGN	139.387	-0.908627	0.279644	-3.24923	0.00115719	0.00923717
CLIC1	1001.48	1.27326	0.116501	10.9292	8.35481e-28	1.1847e-25
CLIC6	52.099	-1.60738	0.38469	-4.17839	2.93581e-05	0.000371876
CLIP1	466.174	0.61798	0.165445	3.73525	0.00018753	0.00191746
CLMN	226.703	1.00485	0.221182	4.54311	5.54311e-06	8.35311e-05
CLMP	318.053	-0.884217	0.195862	-4.51449	6.347e-06	9.49446e-05
CLN8	144.607	5.64886	0.425109	13.288	2.71654e-40	8.15722e-38
CLPTM1L	422.056	0.815342	0.161412	5.05131	4.38792e-07	8.24258e-06
CLSTN2	3968.58	-1.36721	0.149343	-9.15484	5.44395e-20	4.57449e-18
CLSTN3	797.966	0.879543	0.169102	5.20126	1.97937e-07	3.97412e-06
CLTCL1	242.617	-0.636507	0.19118	-3.32936	0.000870456	0.00723691
CLU	394.632	1.49807	0.179138	8.36265	6.13245e-17	3.96261e-15
CMTM7	483.162	-0.666918	0.150302	-4.43719	9.11416e-06	0.000130965
CNGB1	7.19888	2.96005	0.993517	2.97936	0.0028885	0.0199595
CNKSR2	132.925	1.96636	0.361725	5.43608	5.4467e-08	1.23573e-06
CNN1	202.061	-0.837651	0.241659	-3.46625	0.000527777	0.00470674
CNNM2	377.382	0.652905	0.155895	4.18811	2.81281e-05	0.00035785
CNOT3	449.023	0.721644	0.14878	4.85041	1.23206e-06	2.13199e-05
CNTFR	587.606	-1.82604	0.206618	-8.83776	9.76537e-19	7.25087e-17
CNTN3	13.9661	2.36315	0.81421	2.90239	0.0037033	0.0244718
CNTNAP2	2145.34	2.03299	0.127014	16.006	1.16042e-57	6.58185e-55
CNTNAP3	11.9043	-3.03557	0.996008	-3.04774	0.00230571	0.0165368
CNTNAP4	57.703	2.46199	0.405795	6.06707	1.30266e-09	3.75161e-08
COBL	278.946	1.08679	0.240834	4.51262	6.40329e-06	9.57165e-05
COBLL1	292.478	1.34212	0.200656	6.68867	2.25214e-11	8.24129e-10
COCH	118.281	-0.74183	0.26282	-2.82257	0.004764	0.0302194
COG8	327.214	2.10349	0.174487	12.0553	1.81948e-33	3.60698e-31
COL11A1	175.169	-1.24103	0.24642	-5.03624	4.74762e-07	8.86933e-06
COL11A2	268.757	1.97878	0.242603	8.15648	3.4494e-16	2.02395e-14
COL13A1	427.634	-3.01452	0.206939	-14.5672	4.54295e-48	1.75024e-45
COL14A1	96.7399	-0.938243	0.329995	-2.8432	0.00446626	0.0286782
COL16A1	59.8686	-1.7628	0.384423	-4.58557	4.52759e-06	6.9707e-05
COL18A1	5261.32	0.749584	0.151605	4.94433	7.64075e-07	1.37338e-05
COL19A1	224.219	2.0151	0.702289	2.86933	0.00411349	0.0267324
COL1A1	8804.85	0.79079	0.166434	4.75138	2.02028e-06	3.35111e-05
COL1A2	4161.14	-1.22924	0.18802	-6.53781	6.24241e-11	2.17144e-09
COL22A1	38.7862	-4.04026	1.52847	-2.64335	0.00820913	0.0473777
COL3A1	2040.68	4.11925	0.852306	4.83307	1.34443e-06	2.29916e-05
COL4A1	6573.83	1.6776	0.18104	9.26646	1.92425e-20	1.67197e-18
COL4A2	3885.77	0.965396	0.11024	8.75726	2.00048e-18	1.45366e-16
COL5A1	3897.01	-0.639058	0.111982	-5.70681	1.15116e-08	2.89477e-07
COL5A2	1381.16	-0.968982	0.14648	-6.6151	3.71304e-11	1.33245e-09
COL5A3	9.78756	-6.03013	1.6325	-3.69379	0.000220939	0.00221561
COL6A1	5350.84	-1.26772	0.100307	-12.6384	1.29601e-36	3.15037e-34
COL6A4P2	54.7218	-1.16144	0.36199	-3.20848	0.0013344	0.0104076
COL7A1	172.963	-1.73747	0.269221	-6.45371	1.09147e-10	3.65957e-09
COMT	52.8611	-1.09453	0.374147	-2.9254	0.0034401	0.0229735
CORO7	29.885	3.30932	0.581591	5.69012	1.26949e-08	3.16892e-07
COTL1	491.701	-0.976311	0.203501	-4.79757	1.60602e-06	2.7102e-05
COX15	346.453	-0.808272	0.160932	-5.02243	5.10208e-07	9.47948e-06
CPED1	116.895	1.21272	0.262888	4.61308	3.96742e-06	6.1652e-05
CPLX2	18.9422	-3.19121	0.793291	-4.02274	5.75242e-05	0.000679345
CPM	7.98771	-3.59696	1.09882	-3.27348	0.00106232	0.00855451
CPN1	37.2499	4.29552	0.611246	7.02748	2.10293e-12	8.72758e-11
CPNE7	21.7025	-1.66641	0.566798	-2.94005	0.00328158	0.0221582
CPT1A	53.0213	-1.22778	0.369798	-3.32013	0.000899742	0.00742674
CPT2	227.835	0.582226	0.187864	3.09918	0.00194056	0.0143048
CPVL	306.875	1.22828	0.164647	7.46007	8.64798e-14	4.09706e-12
CRABP1	88.217	-1.7294	0.298672	-5.79032	7.02545e-09	1.81816e-07
CRABP2	1267.91	-1.18385	0.178412	-6.63546	3.23498e-11	1.16499e-09
CRB3	75.3399	1.38267	0.483889	2.85741	0.00427115	0.0276339
CREBRF	142.901	0.647244	0.23995	2.69742	0.00698798	0.0415635
CREG1	801.365	0.948116	0.144157	6.57695	4.80185e-11	1.69635e-09
CRHBP	40.8132	8.64549	1.09087	7.92529	2.27606e-15	1.22625e-13
CRISPLD2	44.2647	1.33181	0.395269	3.36938	0.000753367	0.00640424
CRK	708.525	3.79727	0.151752	25.0228	3.45706e-138	8.8237e-135
CRLF1	351.582	-0.750221	0.241326	-3.10874	0.00187887	0.0139305
CRNDE	237.845	-2.43296	0.29276	-8.3104	9.53765e-17	5.97391e-15
CRYBG2	42.9321	1.72088	0.458611	3.75238	0.000175166	0.00180551
CRYL1	24.4318	1.68716	0.538633	3.1323	0.00173442	0.013025
CRYM	105.563	2.10782	0.417198	5.05232	4.36469e-07	8.2065e-06
CRYZP1	4.43599	6.53095	1.87213	3.48851	0.000485719	0.0043672
CSAD	204.152	0.629919	0.199946	3.15044	0.00163025	0.0123748
CSAG1	13.1418	-8.10928	1.5964	-5.07974	3.77943e-07	7.17882e-06
CSAG3	24.0431	-3.60114	0.765911	-4.70177	2.57911e-06	4.19289e-05
CSF3R	43.8371	-1.73068	0.42409	-4.08091	4.48588e-05	0.000542637
CSMD2	69.7281	-2.20748	0.351349	-6.28285	3.32417e-10	1.05293e-08
CSNK2A3	8.87398	3.62832	1.18022	3.07427	0.00211021	0.0153558
CSNK2B	59.9727	1.8928	0.35601	5.3167	1.05666e-07	2.26638e-06
CSPG4P10	90.2026	1.14409	0.282536	4.04938	5.1354e-05	0.000612499
CSRNP1	203.763	0.703728	0.211064	3.33419	0.000855479	0.00713855
CSRP2	899.546	0.647012	0.132261	4.89195	9.98414e-07	1.75444e-05
CST3	490.961	1.17544	0.199471	5.89276	3.79797e-09	1.01639e-07
CTNNA3	33.2797	1.27753	0.470377	2.71597	0.00660818	0.0396394
CTSH	117.603	0.898232	0.301196	2.98222	0.00286169	0.0198145
CTSL	572.546	0.778094	0.172525	4.51003	6.48196e-06	9.67508e-05
CTSO	24.3265	3.06213	0.562564	5.44317	5.234e-08	1.19145e-06
CTTNBP2	426.626	0.794649	0.164215	4.83908	1.30441e-06	2.24242e-05
CUBN	55.2639	1.05844	0.36739	2.88098	0.00396445	0.0259455
CUX2	97.9692	1.26578	0.288329	4.39005	1.13324e-05	0.000159251
CWC25	105.97	1.35731	0.262744	5.16589	2.39294e-07	4.70274e-06
CXADRP3	7.22378	-7.25909	1.76428	-4.11447	3.88068e-05	0.000477635
CXCL12	131.961	-1.10529	0.265152	-4.16852	3.06584e-05	0.000386906
CXCL14	54.0963	-2.30141	0.485783	-4.73753	2.16334e-06	3.56585e-05
CXCL16	15.6659	1.72541	0.605683	2.8487	0.0043898	0.0282672
CXCL5	9.32978	-3.35084	0.996204	-3.36361	0.000769306	0.00651263
CXorf36	2.36878	7.01106	2.17558	3.22261	0.00127027	0.00998369
CXorf56	93.6937	1.10639	0.268374	4.12256	3.74684e-05	0.000463958
CXXC5	902.364	-0.706774	0.132143	-5.34857	8.86502e-08	1.93185e-06
CYB5D2	108.071	0.777314	0.253321	3.0685	0.0021514	0.0155999
CYFIP2	809.379	0.794864	0.150786	5.27148	1.35324e-07	2.82824e-06
CYGB	23.0487	-2.62636	0.643556	-4.08101	4.48395e-05	0.000542637
CYP11A1	25.3148	-1.41026	0.534632	-2.63781	0.00834424	0.0479676
CYP1B1	503.523	-2.20034	0.178991	-12.293	9.87163e-35	2.14435e-32
CYP1B1.AS1	27.8267	-1.76764	0.525113	-3.36621	0.000762073	0.00645943
CYP26A1	404.816	-4.49347	0.215153	-20.885	7.33102e-97	8.66981e-94
CYP26C1	6.17126	-5.30078	1.76538	-3.00263	0.00267659	0.0186977
CYP2A7P2	8.78296	-3.08655	1.01906	-3.02881	0.00245521	0.0174315
CYP2D6	9.41775	2.95239	1.00011	2.95206	0.00315666	0.0214638
CYP2U1	71.3392	1.13253	0.302369	3.74554	0.000180007	0.00184795
CYP4A11	3.33953	4.99763	1.6988	2.94186	0.00326243	0.0220508
CYP4B1	7.51363	3.4361	1.07953	3.18296	0.00145779	0.0112158
CYP4X1	56.1095	3.36998	0.389214	8.65843	4.78318e-18	3.439e-16
CYSLTR2	65.9672	3.03874	0.577291	5.2638	1.41106e-07	2.93164e-06
D2HGDH	145.138	0.588813	0.221041	2.66382	0.00772597	0.0450226
DAB1	686.204	-0.590949	0.151405	-3.90311	9.49664e-05	0.00105669
DAB2	797.788	1.16995	0.197004	5.93868	2.87335e-09	7.82278e-08
DACT1	559.737	-1.9899	0.484718	-4.10527	4.03842e-05	0.000494664
DACT2	42.9646	1.23596	0.421344	2.93337	0.003353	0.0225288
DAG1	3678.14	0.850492	0.156383	5.43853	5.37224e-08	1.2202e-06
DAXX	475.319	1.68278	0.152454	11.0379	2.50744e-28	3.82085e-26
DBNDD1	381.736	0.850879	0.243451	3.49507	0.000473936	0.00427443
DCAF13	455.211	-0.772521	0.155131	-4.9798	6.36489e-07	1.16247e-05
DCAF6	256.7	0.699746	0.17867	3.91641	8.9879e-05	0.00100837
DCBLD1	214.265	0.613089	0.189057	3.24288	0.00118328	0.00942039
DCLK1	167.778	-3.63995	0.283961	-12.8185	1.29205e-37	3.47136e-35
DCP1A	925.809	0.812407	0.125404	6.47834	9.27348e-11	3.12467e-09
DCUN1D1	342.78	-0.84782	0.2181	-3.8873	0.000101364	0.0011178
DDAH2	682.981	1.40098	0.128035	10.9421	7.24765e-28	1.04957e-25
DDC	4.45484	5.14142	1.56423	3.28686	0.0010131	0.0082351
DDIT4	217.14	-1.54513	0.340716	-4.53496	5.76147e-06	8.65661e-05
DDIT4L	46.6094	1.79462	0.481518	3.727	0.000193776	0.00197244
DDR1	1191.35	1.29843	0.133085	9.75635	1.73286e-22	1.77805e-20
DDTL	10.857	3.67989	1.00487	3.66205	0.000250206	0.0024728
DDX12P	89.8746	-0.76761	0.282943	-2.71295	0.00666868	0.039967
DDX24	690.586	1.56682	0.135302	11.5802	5.19239e-31	9.46637e-29
DDX25	28.2955	-1.37441	0.51388	-2.67456	0.00748264	0.043892
DDX39B	572.099	6.96744	0.312429	22.3009	3.62312e-110	6.7255e-107
DDX52	541.941	1.85337	0.142216	13.0321	8.03211e-39	2.30997e-36
DECR2	72.8552	1.87912	0.304384	6.17351	6.67923e-10	2.02049e-08
DEGS1	267.703	-0.645211	0.18855	-3.42196	0.000621705	0.00543201
DENND1C	79.7694	1.30352	0.373239	3.49245	0.00047861	0.00430897
DENND2A	359.238	0.821872	0.162018	5.07271	3.92182e-07	7.43544e-06
DENND2C	322.084	2.58019	0.258889	9.96642	2.13806e-23	2.37266e-21
DENND6A	221.221	0.587052	0.186321	3.15076	0.00162845	0.0123657
DEPDC5	137.975	-0.623283	0.233325	-2.67131	0.0075556	0.0442713
DET1	74.0954	-1.96253	0.332536	-5.90171	3.59759e-09	9.65297e-08
DEXI	35.4953	1.32682	0.463946	2.85987	0.00423812	0.0274376
DGAT2	53.5313	1.10504	0.35546	3.10877	0.0018787	0.0139305
DGCR9	9.05537	2.6288	0.836742	3.14171	0.00167965	0.0126884
DGKI	933.714	-1.82983	0.174676	-10.4755	1.11903e-25	1.4018e-23
DGKK	795.577	1.52007	0.435921	3.48702	0.000488432	0.00438772
DGKQ	347.914	-0.612357	0.168644	-3.63105	0.000282267	0.00272382
DHFRP1	5.54348	6.00409	1.79645	3.34219	0.000831215	0.00696168
DHPS	104.539	-4.71138	0.372601	-12.6446	1.19887e-36	2.94936e-34
DHRS11	143.506	1.11135	0.227497	4.88511	1.03369e-06	1.80555e-05
DHX16	376.497	0.896328	0.151807	5.90439	3.53947e-09	9.52207e-08
DIABLO	6.88287	-7.18469	1.73895	-4.13164	3.60189e-05	0.000447912
DIAPH2	154.373	-0.920039	0.217086	-4.23813	2.25394e-05	0.000293142
DIO3	103.965	1.50509	0.434287	3.46566	0.00052894	0.00471223
DIRAS1	126.861	-1.4805	0.260198	-5.68987	1.27135e-08	3.16969e-07
DISC1	154.875	-0.76947	0.257215	-2.99155	0.00277568	0.0192712
DISP1	253.269	-0.683846	0.216888	-3.15299	0.00161607	0.0122991
DISP3	122.588	-2.37119	0.27558	-8.60438	7.67316e-18	5.36569e-16
DIXDC1	313.196	0.612626	0.167384	3.66	0.000252216	0.00248792
DLG5	1683.98	0.882486	0.1287	6.85695	7.03479e-12	2.77304e-10
DLG5.AS1	3.24347	6.18753	1.97624	3.13097	0.00174232	0.01307
DLGAP1.AS2	30.9289	-1.33743	0.496633	-2.69299	0.00708144	0.0420215
DLL3	567.291	-3.71276	0.521192	-7.12359	1.0515e-12	4.46376e-11
DLL4	6.29307	3.62877	1.07948	3.3616	0.000774925	0.00654977
DMBT1	15.6378	-2.9498	0.752736	-3.91877	8.9003e-05	0.00100019
DMBX1	73.2216	-2.26679	0.454742	-4.98479	6.20281e-07	1.13694e-05
DNAH10	31.1145	2.94447	0.604689	4.8694	1.1194e-06	1.94859e-05
DNAH10OS	40.1868	9.15645	1.50189	6.09664	1.08322e-09	3.1688e-08
DNAH2	281.938	0.927375	0.185815	4.99086	6.01112e-07	1.10577e-05
DNAJA3	373.413	1.6738	0.16644	10.0565	8.60111e-24	9.757e-22
DNAJB2	227.627	0.75607	0.224753	3.364	0.000768222	0.00650615
DNAJB4	111.835	0.797049	0.293936	2.71164	0.00669508	0.0401135
DNAJC22	35.249	1.5727	0.42993	3.65804	0.000254148	0.00250336
DNAJC28	10.6537	5.4943	1.26116	4.35656	1.32126e-05	0.000182234
DNAJC6	525.954	1.05555	0.150404	7.01811	2.24888e-12	9.31439e-11
DND1P1	15.4501	6.96119	1.52681	4.55931	5.13213e-06	7.79709e-05
DNM1	647.222	-0.857192	0.135776	-6.31328	2.73187e-10	8.77076e-09
DNMBP	888.938	1.35558	0.204208	6.63822	3.17503e-11	1.14542e-09
DNMT3B	2091.04	-0.771159	0.0989963	-7.78978	6.71261e-15	3.51448e-13
DOCK11	181.679	-1.1843	0.254566	-4.65225	3.28328e-06	5.22535e-05
DOCK8	132.014	1.20714	0.317816	3.79823	0.000145733	0.00153466
DOK4	2570.11	0.887254	0.138013	6.42876	1.28652e-10	4.29239e-09
DOK5	24.8298	-1.69768	0.564387	-3.00801	0.00262963	0.018422
DOK6	115.158	1.96469	0.256249	7.66711	1.75912e-14	8.84717e-13
DPEP1	14.2345	2.94426	0.745025	3.95189	7.75355e-05	0.00089144
DPEP3	18.4911	-7.10088	1.56202	-4.54597	5.46828e-06	8.25864e-05
DPP10	93.3401	-1.26564	0.305497	-4.14289	3.42957e-05	0.000429358
DPP4	18.4685	1.91964	0.590442	3.25119	0.00114924	0.0091845
DPPA4	489.333	-1.22363	0.142847	-8.56601	1.07129e-17	7.3652e-16
DPY19L1	842.909	0.749328	0.120705	6.20795	5.36812e-10	1.64089e-08
DPY19L2	125.424	-0.884381	0.265946	-3.32541	0.000882874	0.00731929
DPY19L2P1	25.57	-1.77854	0.565989	-3.14235	0.00167598	0.0126654
DPYD	40.0413	2.47138	0.49673	4.97529	6.51504e-07	1.18671e-05
DPYSL2	914.349	-0.669577	0.146423	-4.57288	4.81072e-06	7.35805e-05
DPYSL3	1461.43	1.104	0.147629	7.47819	7.53514e-14	3.57814e-12
DRAXIN	222.501	-1.08334	0.240814	-4.49867	6.83808e-06	0.000101252
DRD2	69.3814	-5.63753	0.621441	-9.07172	1.17153e-19	9.45511e-18
DSCC1	143.407	-0.691405	0.233079	-2.9664	0.0030131	0.0206458
DSE	343.564	-0.72105	0.160846	-4.48287	7.36466e-06	0.000107876
DSEL	45.8298	2.72498	0.604785	4.50571	6.61526e-06	9.83093e-05
DTD1	106.318	-1.02674	0.253787	-4.04569	5.21701e-05	0.000621868
DTNB	315.465	0.864696	0.162921	5.30745	1.1117e-07	2.36456e-06
DTWD2	86.2531	-0.783333	0.292815	-2.67518	0.00746882	0.0438788
DTX2	124.58	0.777844	0.232744	3.34207	0.000831575	0.00696184
DTX3L	50.0679	1.29814	0.356314	3.64323	0.000269234	0.00263037
DTX4	414.576	1.26947	0.207052	6.13118	8.72288e-10	2.59639e-08
DUSP14	166.14	3.66567	0.272831	13.4357	3.73583e-41	1.15579e-38
DUSP27	38.0545	1.32911	0.454674	2.92321	0.00346445	0.0231103
DUSP5	569.768	-1.02057	0.15284	-6.67738	2.43254e-11	8.88551e-10
DUSP9	45.7371	1.85026	0.466869	3.96312	7.3976e-05	0.000853253
DUT	232.652	-0.593508	0.200386	-2.96182	0.00305822	0.0208779
DXO	84.9067	1.34963	0.296223	4.55614	5.2103e-06	7.90409e-05
DYNC1I2P1	11.534	2.53401	0.8264	3.06632	0.00216709	0.0156858
DYNLT3	230.858	2.26295	0.510704	4.43104	9.37818e-06	0.000134475
DYRK3	97.1137	-0.757026	0.282057	-2.68395	0.00727583	0.0428883
DYSF	278.343	3.34528	0.19318	17.3169	3.50893e-67	2.31125e-64
E2F1	270.289	-0.584	0.184578	-3.16397	0.0015563	0.0118841
E2F5	324.711	0.584777	0.190269	3.07342	0.00211622	0.0153886
EBF2	143.258	-2.879	0.422876	-6.80813	9.88724e-12	3.83088e-10
EBF3	50.5078	-3.47276	0.707158	-4.91087	9.06739e-07	1.60718e-05
ECE2	13.5993	-8.20619	1.60072	-5.12657	2.95075e-07	5.72731e-06
ECHDC2	209.354	0.785798	0.288238	2.72621	0.00640659	0.038532
EDIL3	262.889	-0.787102	0.189742	-4.14827	3.35004e-05	0.000420175
EDNRA	183.298	1.92778	0.264492	7.2886	3.13187e-13	1.40858e-11
EDNRB	392.818	-0.890147	0.164033	-5.42662	5.74323e-08	1.29725e-06
EEF1A1P19	63.9075	1.92901	0.340996	5.65699	1.54048e-08	3.79891e-07
EEF1A1P5	232.033	-2.29328	0.235034	-9.75722	1.71799e-22	1.7717e-20
EEF1A1P6	24.5982	-1.49664	0.544721	-2.74754	0.00600448	0.0366205
EEF1A2	347.041	1.88349	0.231139	8.14876	3.67685e-16	2.14508e-14
EEF1D	509.745	1.3911	0.164979	8.432	3.39813e-17	2.26014e-15
EEFSEC	224.032	0.604438	0.185575	3.25711	0.00112551	0.00901247
EFCAB1	8.82117	-2.82482	1.02985	-2.74293	0.00608932	0.0370384
EFEMP1	236.693	1.72828	0.28288	6.1096	9.98788e-10	2.94289e-08
EFNA1	356.96	1.41071	0.188563	7.48138	7.35479e-14	3.51704e-12
EFNB1	508.93	-1.9597	0.429778	-4.55979	5.12057e-06	7.78532e-05
EFNB2	483.516	-0.790401	0.221676	-3.56558	0.000363057	0.00338969
EGFL8	10.2562	7.36942	1.65961	4.44045	8.97716e-06	0.00012927
EGFLAM	480.018	1.29828	0.163981	7.91723	2.42867e-15	1.30503e-13
EGFLAM.AS4	16.8584	-4.77776	0.968432	-4.9335	8.07676e-07	1.44539e-05
EGLN2	107.62	-0.75527	0.26569	-2.84268	0.00447365	0.0286988
EHD1	444.022	0.78941	0.146966	5.37139	7.81309e-08	1.71728e-06
EHD2	214.766	-0.723883	0.206681	-3.50242	0.000461056	0.00416931
EHHADH	132.86	1.04472	0.273074	3.82577	0.000130363	0.00139237
EIF1AXP1	8.22431	3.52592	0.992899	3.55114	0.000383569	0.00355359
EIF3C	155.848	-1.07208	0.224092	-4.78411	1.7175e-06	2.88638e-05
EIF3CL	23.7528	-7.51553	1.52343	-4.9333	8.08523e-07	1.44564e-05
EIF4BP3	11.8113	2.69183	0.789288	3.41046	0.000648541	0.00564241
EIF4E	431.486	-0.589088	0.157148	-3.74862	0.000177808	0.00182812
EIF4EBP2	2626.25	0.958871	0.116386	8.23873	1.74055e-16	1.06728e-14
EIF5A2	53.472	-1.03243	0.373526	-2.764	0.00570972	0.0351801
ELF1	227.441	0.865193	0.200927	4.30601	1.66226e-05	0.000223165
ELF3.AS1	22.9393	2.08291	0.574274	3.62703	0.0002867	0.00276269
ELF4	133.407	0.780636	0.243196	3.20991	0.00132776	0.0103637
ELFN1	545.608	-0.581429	0.157329	-3.69564	0.000219336	0.00220079
ELMO1	588.833	-0.789841	0.182029	-4.3391	1.43071e-05	0.000195933
ELN	270.741	-1.18952	0.191994	-6.19564	5.80479e-10	1.76381e-08
ELOVL1	199.085	0.77371	0.193599	3.99646	6.42975e-05	0.000750223
ELOVL6	849.251	-0.658318	0.137514	-4.78728	1.69057e-06	2.84347e-05
EME2	95.0857	-0.932361	0.334992	-2.78323	0.00538205	0.0334743
EMG1	108.526	1.39451	0.255318	5.46184	4.71221e-08	1.08354e-06
EMILIN1	465.216	-1.04836	0.190847	-5.49323	3.94658e-08	9.25203e-07
EMILIN3	195.087	-0.811232	0.20494	-3.95839	7.54572e-05	0.000868725
EML5	21.3346	3.23988	0.610506	5.30688	1.11517e-07	2.36947e-06
EMP2	1136.63	0.743755	0.160877	4.62314	3.77968e-06	5.91851e-05
ENG	31.3777	1.39347	0.453472	3.07288	0.00212002	0.0154107
ENO3	224.981	0.813884	0.20793	3.91423	9.06948e-05	0.00101641
ENPP1	226.206	-1.73189	0.298854	-5.7951	6.82824e-09	1.76936e-07
ENPP2	323.492	1.25489	0.209903	5.97844	2.25289e-09	6.24175e-08
EOGT	202.637	-0.999158	0.21356	-4.67858	2.88868e-06	4.63347e-05
EOMES	375.541	-2.24282	0.198572	-11.2947	1.39339e-29	2.29449e-27
EPAS1	206.385	1.32459	0.24027	5.51291	3.52955e-08	8.36079e-07
EPB41L1	574.937	0.713112	0.137871	5.17232	2.31205e-07	4.56284e-06
EPHA2	967.562	-0.83165	0.132388	-6.28193	3.34391e-10	1.05696e-08
EPHB1	44.4801	-1.4587	0.470227	-3.10213	0.00192136	0.0141889
EPHB2	2195.38	1.08479	0.146596	7.39981	1.36376e-13	6.28592e-12
EPHB3	1236.52	-1.38668	0.204451	-6.78246	1.18146e-11	4.56035e-10
EPHB4	1276.45	0.60031	0.115607	5.19265	2.07317e-07	4.13803e-06
EPHB6	588.96	0.680931	0.156525	4.35031	1.35946e-05	0.000186802
EPHX2	135.772	1.00675	0.224741	4.4796	7.47839e-06	0.000109307
EPOP	77.2593	8.79957	1.42738	6.16483	7.0557e-10	2.12807e-08
EPPK1	345.289	1.03518	0.267643	3.86778	0.000109832	0.00119607
EPSTI1	153.94	2.12681	0.712639	2.98442	0.00284115	0.0196789
ERBB3	375.878	0.69208	0.182099	3.80057	0.000144366	0.00152185
ERG	21.9115	3.34183	0.62689	5.33081	9.77784e-08	2.1105e-06
ERICH2	25.1547	1.50591	0.500428	3.00924	0.00261906	0.0183839
ERMARD	96.2167	1.28576	0.27194	4.72811	2.26624e-06	3.72579e-05
ERRFI1	751.32	1.44655	0.375245	3.85494	0.000115757	0.00124995
ERVH48.1	296.147	-0.72859	0.185779	-3.92182	8.78831e-05	0.000990333
ERVMER61.1	10.1566	7.36206	1.64642	4.47157	7.76472e-06	0.000112926
ESAM	13.1729	4.98189	0.87094	5.72013	1.06443e-08	2.70332e-07
ESRG	23.3805	-4.01839	0.761903	-5.27415	1.33371e-07	2.79888e-06
ESRP1	361.346	0.731084	0.24088	3.03506	0.00240488	0.0171233
ESRRG	194.649	2.94926	0.565871	5.21189	1.86928e-07	3.78283e-06
ESYT1	1588.68	0.641713	0.102799	6.24239	4.30928e-10	1.3332e-08
ETNPPL	24.3628	-1.40408	0.524881	-2.67505	0.00747179	0.0438788
ETS1	321.675	1.17543	0.159146	7.38585	1.5148e-13	6.96638e-12
ETV1	183.792	-1.56278	0.257162	-6.07703	1.22429e-09	3.54594e-08
ETV4	40.193	-2.24794	0.485934	-4.62601	3.72778e-06	5.8527e-05
ETV5	200.737	-2.26155	0.569098	-3.97392	7.06994e-05	0.000819303
ETV6	199.35	-1.13992	0.222101	-5.13242	2.86035e-07	5.56243e-06
EVC	452.166	0.800257	0.157174	5.09154	3.55162e-07	6.77762e-06
EXOC3L1	74.9988	1.12449	0.297583	3.77874	0.000157623	0.00164612
EXOC6	113.107	1.44527	0.297564	4.85701	1.19171e-06	2.06743e-05
EXPH5	264.24	3.04889	0.276633	11.0214	3.01272e-28	4.52329e-26
EXT1	608.057	1.01734	0.16168	6.29232	3.12757e-10	9.94734e-09
EZR	1284.77	0.628188	0.126063	4.98313	6.25625e-07	1.14468e-05
F10	140.131	1.40031	0.284225	4.92677	8.35989e-07	1.49003e-05
F11R	854.2	0.981471	0.179146	5.47861	4.28673e-08	9.97438e-07
F2	34.2899	4.38262	0.664409	6.59627	4.21619e-11	1.49983e-09
F2R	487.77	1.15946	0.148993	7.78198	7.14008e-15	3.71922e-13
F2RL2	118.11	9.07765	0.761731	11.9171	9.63606e-33	1.87389e-30
F7	34.8943	2.21739	0.480103	4.61858	3.86384e-06	6.024e-05
FABP5	59.8795	-1.45238	0.339586	-4.27693	1.89492e-05	0.000251087
FADS2	2553.85	0.703573	0.124893	5.6334	1.76696e-08	4.33128e-07
FAM107B	341.911	1.17227	0.190008	6.16959	6.84666e-10	2.06808e-08
FAM111A	142.881	1.14057	0.287279	3.97026	7.17934e-05	0.000831038
FAM111A.DT	13.9676	2.05418	0.686486	2.99231	0.00276878	0.0192429
FAM118A	415.048	0.955222	0.150856	6.33203	2.41949e-10	7.80468e-09
FAM120B	264.169	2.50847	0.18534	13.5344	9.79555e-42	3.17485e-39
FAM122C	100.985	1.36151	0.308345	4.41555	1.00754e-05	0.000143266
FAM124A	175.544	-1.05229	0.268446	-3.91992	8.85768e-05	0.000996135
FAM126A	1223.16	0.638864	0.136723	4.6727	2.97271e-06	4.76076e-05
FAM135A	249.139	-0.646408	0.185232	-3.48973	0.00048351	0.00434925
FAM166B	9.22638	2.46257	0.8803	2.79742	0.00515122	0.0322845
FAM184A	559.537	1.07396	0.392788	2.7342	0.00625319	0.0378099
FAM189A1	121.816	3.16984	0.318889	9.94025	2.78122e-23	3.05321e-21
FAM189A2	69.7326	-1.66345	0.525578	-3.16498	0.00155091	0.0118521
FAM189B	656.445	1.29132	0.133604	9.66527	4.23482e-22	4.19762e-20
FAM198A	41.8828	1.30059	0.444873	2.92352	0.00346103	0.023095
FAM19A4	97.1617	1.83802	0.397102	4.62858	3.68173e-06	5.78732e-05
FAM20A	116.236	-0.849039	0.245555	-3.45763	0.000544955	0.00482543
FAM20C	180.629	1.91723	0.242567	7.90395	2.70209e-15	1.44057e-13
FAM238C	19.8459	-2.03567	0.638965	-3.18588	0.00144312	0.0111365
FAM43A	43.9333	-1.37152	0.421468	-3.25414	0.00113738	0.0090968
FAM45BP	2.78555	6.18708	2.04425	3.02658	0.00247334	0.0175236
FAM78A	61.5139	-1.83327	0.383217	-4.78391	1.71919e-06	2.88685e-05
FAM83H	1009.02	3.45597	0.137034	25.2197	2.43705e-140	7.10887e-137
FAM86B3P	84.6603	-0.945382	0.309534	-3.05421	0.00225652	0.0162239
FAM86DP	206.383	-0.725209	0.19544	-3.71064	0.000206734	0.00208872
FAM86GP	57.4413	-1.33014	0.366133	-3.63293	0.000280218	0.00270789
FAM89A	628.879	-0.894514	0.156485	-5.71629	1.08873e-08	2.75474e-07
FAM98A	289.641	-0.889086	0.232621	-3.82204	0.000132351	0.00140901
FAN1	265.229	1.14878	0.197166	5.82647	5.66104e-09	1.48196e-07
FAR1	853.591	-0.615556	0.134792	-4.56669	4.9548e-06	7.56143e-05
FAR2	157.064	1.18335	0.285094	4.15073	3.31411e-05	0.000416436
FAR2P1	208.979	-0.931768	0.253518	-3.67536	0.000237518	0.00236348
FAR2P2	78.708	-2.22511	0.341263	-6.52024	7.01947e-11	2.42522e-09
FAR2P3	19.8417	-3.00413	0.689175	-4.35902	1.30648e-05	0.000180616
FARP1	1844.97	1.53675	0.174383	8.81251	1.22375e-18	9.05351e-17
FAT3	577.557	-0.829492	0.189981	-4.36619	1.26433e-05	0.000175505
FAT4	275.828	-0.702871	0.187373	-3.75119	0.000175995	0.0018114
FBN1	836.89	-0.952009	0.13657	-6.97084	3.15047e-12	1.28917e-10
FBN2	13904.9	-1.10621	0.103137	-10.7256	7.71942e-27	1.0104e-24
FBXL16	43.1968	-1.29525	0.392466	-3.30028	0.000965894	0.00788903
FBXL18	187.066	0.837248	0.197446	4.2404	2.23125e-05	0.000290747
FBXO2	219	-0.67933	0.228895	-2.96786	0.00299878	0.0206099
FBXO32	32.133	2.72661	0.489957	5.565	2.62151e-08	6.3049e-07
FBXW8	483.222	0.667195	0.14403	4.63234	3.61551e-06	5.69903e-05
FCF1P2	4.35557	-6.53784	1.93103	-3.38567	0.000710052	0.00608672
FCGRT	244.316	0.827138	0.183554	4.50625	6.5984e-06	9.81302e-05
FER1L4	103.923	-1.09225	0.268895	-4.062	4.86531e-05	0.000584038
FERMT1	62.694	1.31963	0.4022	3.28102	0.00103432	0.00836177
FGA	63.0098	3.61201	1.15175	3.13611	0.00171202	0.0128714
FGB	34.4597	6.07735	1.34794	4.5086	6.52553e-06	9.7188e-05
FGD6	1790.5	1.43807	0.344571	4.1735	2.99961e-05	0.000379016
FGF12	54.0046	-1.93705	0.388332	-4.98812	6.09688e-07	1.11953e-05
FGF17	57.142	-3.81357	0.607655	-6.27587	3.47677e-10	1.09556e-08
FGF2	129.553	-1.36819	0.248884	-5.49729	3.8568e-08	9.07282e-07
FGF3	4.22899	-6.43804	1.91518	-3.36158	0.000774976	0.00654977
FGF8	73.4433	-3.24644	0.538057	-6.03363	1.60314e-09	4.55279e-08
FGFBP3	36.2229	-1.37964	0.456499	-3.02222	0.00250927	0.017729
FGFR1	5726.1	0.773564	0.155708	4.96804	6.76318e-07	1.22972e-05
FGFR2	1547.63	1.20184	0.172473	6.96829	3.2081e-12	1.31012e-10
FGFR4	1208.51	1.47043	0.329486	4.4628	8.08961e-06	0.000117233
FGG	4.9703	6.63709	1.75535	3.78106	0.000156159	0.00163368
FILIP1	136.758	2.19542	0.250487	8.7646	1.87435e-18	1.36687e-16
FILIP1L	96.1566	1.7038	0.370003	4.60483	4.12796e-06	6.38552e-05
FKBP5	277.088	-1.10438	0.210663	-5.24241	1.58496e-07	3.26243e-06
FKBPL	22.086	7.34177	1.48439	4.94597	7.57664e-07	1.36462e-05
FLG	16.2081	-2.54712	0.736237	-3.45965	0.000540876	0.00479739
FLI1	41.5223	7.17373	0.75565	9.49346	2.23486e-21	2.11267e-19
FLJ13224	2.8775	6.19346	1.99855	3.09897	0.00194192	0.0143097
FLNB	4251.01	0.856421	0.113011	7.57819	3.50406e-14	1.73243e-12
FLNC	9019.73	-0.68094	0.137334	-4.95829	7.11175e-07	1.2908e-05
FLOT1	1026.8	0.744128	0.114588	6.49394	8.362e-11	2.85048e-09
FLRT2	473.439	0.87922	0.141157	6.22867	4.70402e-10	1.44533e-08
FLRT3	1718.11	2.77756	0.533341	5.20785	1.91043e-07	3.84706e-06
FMO2	8.25084	4.56484	1.03818	4.39696	1.09778e-05	0.000154911
FMO4	32.1944	1.29921	0.442013	2.9393	0.00328959	0.022183
FNDC4	181.818	-0.760033	0.267302	-2.84335	0.00446422	0.0286741
FNIP2	423.361	1.0405	0.15164	6.86165	6.80719e-12	2.68851e-10
FOLR1	150.882	2.22633	0.280381	7.94038	2.01566e-15	1.08883e-13
FOPNL	179.675	1.7599	0.212681	8.27482	1.28653e-16	7.96052e-15
FOSL1	11.6505	-2.27564	0.843475	-2.69793	0.00697724	0.0415238
FOSL2	90.5613	1.61455	0.293554	5.50002	3.79758e-08	8.95414e-07
FOXA1	288.031	1.85357	0.556673	3.32974	0.000869284	0.0072301
FOXA2	512.513	1.75359	0.583867	3.0034	0.00266981	0.0186567
FOXC1	477.684	-1.89779	0.238517	-7.95663	1.76789e-15	9.57521e-14
FOXC2	159.046	-5.79319	0.861366	-6.72559	1.74888e-11	6.52839e-10
FOXI2	44.9093	-3.65571	0.507858	-7.19829	6.09726e-13	2.63771e-11
FOXK1	738.998	0.647981	0.129592	5.00018	5.72777e-07	1.05555e-05
FOXL1	27.354	-5.79396	1.22819	-4.71747	2.38793e-06	3.91012e-05
FOXL2NB	13.9399	-3.47664	0.978358	-3.55354	0.000380082	0.00352608
FOXO4	201.732	0.751736	0.207368	3.62513	0.000288816	0.00277818
FP236383.3	100.537	-11.102	1.498	-7.41117	1.25187e-13	5.82275e-12
FP565260.6	6.70473	-3.13982	1.19361	-2.63052	0.0085254	0.0488426
FP671120.4	51.6782	3.53708	0.616168	5.74045	9.44227e-09	2.40701e-07
FRAS1	3852.75	1.25519	0.344673	3.64168	0.000270862	0.00264272
FRAT1	63.2898	1.15241	0.318823	3.61459	0.000300818	0.00287971
FRAT2	221.957	0.808236	0.223042	3.6237	0.000290423	0.00279065
FREM2	2166.73	2.49438	0.341989	7.29375	3.01439e-13	1.36174e-11
FRG1.DT	5.00262	4.16043	1.47007	2.83008	0.00465363	0.0296575
FRG1BP	87.1948	0.737143	0.276978	2.66138	0.0077821	0.0452972
FRK	15.7986	2.05806	0.665859	3.09084	0.0019959	0.014644
FRMD4A	351.245	1.80481	0.21445	8.41599	3.89585e-17	2.56611e-15
FRMD4B	270.79	0.879417	0.19364	4.54151	5.58524e-06	8.4104e-05
FRMD6	961.075	0.827383	0.149869	5.5207	3.37642e-08	8.04471e-07
FRMPD2	26.9614	-2.99778	0.715867	-4.18762	2.81894e-05	0.000358182
FRMPD3	42.5199	-1.16757	0.436537	-2.67461	0.00748164	0.043892
FRS2	687.289	0.64768	0.133933	4.83584	1.32585e-06	2.27118e-05
FRY	497.939	2.33983	0.645067	3.62727	0.000286436	0.00276145
FRZB	161.898	0.756072	0.250124	3.02279	0.0025046	0.0177082
FSHR	230.737	-0.85033	0.199823	-4.25542	2.08654e-05	0.000273635
FST	71.5823	-1.10309	0.308284	-3.57816	0.000346017	0.00325591
FTCD	8.4498	3.23966	1.04146	3.1107	0.00186645	0.0138687
FTLP3	7.86467	4.08046	1.08459	3.76221	0.000168421	0.00174568
FTX	368.22	0.771021	0.196554	3.9227	8.75629e-05	0.000987271
FURIN	1856.84	0.808153	0.116535	6.93487	4.06605e-12	1.63757e-10
FXYD4	2.50777	6.36058	2.16871	2.93288	0.0033583	0.0225495
FXYD6	496.027	0.778363	0.161062	4.83269	1.34701e-06	2.30164e-05
FYCO1	273.806	0.862122	0.175075	4.92429	8.46658e-07	1.50592e-05
FZD2	1423.32	-1.20421	0.129768	-9.27973	1.69907e-20	1.48262e-18
FZD4	1490.93	1.27397	0.167589	7.60175	2.92158e-14	1.45502e-12
GABARAP	73.1887	0.839261	0.303929	2.76138	0.00575584	0.0354002
GABBR1	559.625	1.2029	0.144037	8.35132	6.75017e-17	4.32074e-15
GABBR2	50.1172	-2.10858	0.404863	-5.20813	1.90749e-07	3.84492e-06
GABRA5	7.15546	-2.90694	1.08496	-2.67929	0.00737775	0.0434014
GABRB3	221.486	-3.19516	0.233503	-13.6836	1.27295e-42	4.40549e-40
GABRE	55.1647	-1.81907	0.370661	-4.90762	9.2187e-07	1.63117e-05
GABRG2	28.6272	-2.00353	0.511596	-3.91623	8.99437e-05	0.00100855
GAL	82.8927	-3.75208	0.417659	-8.9836	2.62057e-19	2.066e-17
GAL3ST1	116.397	1.64012	0.307525	5.33328	9.64549e-08	2.08414e-06
GAL3ST2	3.85428	6.51172	1.90233	3.42303	0.000619268	0.00541534
GALC	479.92	0.637541	0.15915	4.00591	6.17799e-05	0.000723328
GALNT10	351.294	0.827942	0.15859	5.22065	1.78294e-07	3.62246e-06
GALNT6	128.382	0.735062	0.280207	2.62328	0.0087088	0.0496718
GALNT9	5.75429	-3.91039	1.40486	-2.78347	0.00537808	0.0334634
GAMT	232.758	0.784867	0.198998	3.94409	8.01026e-05	0.000914773
GAPDHP1	27.457	1.85273	0.507181	3.65299	0.000259205	0.0025464
GAPDHP65	17.7642	1.79187	0.622238	2.87972	0.00398027	0.0260241
GAS5	662.335	-0.96834	0.12872	-7.52282	5.36077e-14	2.59388e-12
GAS6	448.713	1.30748	0.237536	5.50436	3.70505e-08	8.75619e-07
GAS7	497.191	-1.45417	0.161884	-8.9828	2.63955e-19	2.07296e-17
GATA2	144.063	2.27887	0.278249	8.19002	2.61175e-16	1.55934e-14
GATA2.AS1	57.1315	2.25555	0.369306	6.10753	1.01184e-09	2.97705e-08
GATA3	993.447	1.50996	0.559715	2.69772	0.00698156	0.0415374
GATA4	2500.67	1.79276	0.159506	11.2395	2.60945e-29	4.19546e-27
GATA5	399.161	1.40887	0.155616	9.05351	1.38445e-19	1.11295e-17
GATAD2B	521.156	2.04035	0.158455	12.8765	6.10108e-38	1.66104e-35
GBA	175.369	1.28649	0.248854	5.16967	2.34503e-07	4.61747e-06
GBAP1	49.8117	1.31663	0.389904	3.3768	0.000733343	0.00625486
GCK	49.8817	-1.32764	0.410194	-3.23662	0.00120956	0.00958771
GCNT1	169.111	-0.936051	0.213255	-4.38935	1.13691e-05	0.000159551
GCNT2	613.278	-0.795437	0.161709	-4.91893	8.70188e-07	1.54373e-05
GCSH	25.7038	-1.66816	0.545008	-3.0608	0.00220747	0.015916
GDAP1L1	34.8544	-1.64681	0.489946	-3.3612	0.000776034	0.00655599
GDF6	42.2528	2.88216	0.645201	4.46708	7.92956e-06	0.000115159
GDPD5	95.8168	1.44056	0.262135	5.49549	3.89622e-08	9.15499e-07
GEN1	178.921	-0.621179	0.218797	-2.83906	0.00452462	0.0289527
GFPT2	342.272	-1.6738	0.194266	-8.61604	6.9311e-18	4.8971e-16
GFRA1	141.249	-3.02923	0.91197	-3.32163	0.000894934	0.00739994
GFY	9.92075	2.93785	0.813457	3.61156	0.000304359	0.00290814
GGCT	140.07	-0.760188	0.225302	-3.37409	0.000740601	0.00630623
GGCX	590.947	0.925785	0.135795	6.81752	9.26245e-12	3.60247e-10
GGNBP2	452.033	1.00705	0.149071	6.7555	1.4234e-11	5.41236e-10
GGPS1	162.464	-0.763149	0.224696	-3.39636	0.000682884	0.00590089
GGT1	44.7717	1.59401	0.37215	4.28324	1.84189e-05	0.000244854
GIMAP4	2.24533	6.90223	2.16537	3.18755	0.00143485	0.011081
GIMAP8	7.47073	8.68706	1.69489	5.12544	2.96843e-07	5.74642e-06
GJA5	32.7451	-1.35057	0.492464	-2.74248	0.0060978	0.0370789
GJB1	7.29886	5.10779	1.21042	4.21984	2.44475e-05	0.00031475
GLB1L3	11.683	-2.24094	0.768984	-2.91416	0.00356651	0.0236982
GLDC	339.601	1.39769	0.262268	5.32926	9.8613e-08	2.12627e-06
GLI3	719.381	-1.12325	0.205614	-5.4629	4.68426e-08	1.07923e-06
GLIPR2	230.101	-0.746206	0.192604	-3.87431	0.000106927	0.00117007
GLIS1	24.1943	-1.90147	0.553989	-3.43232	0.00059844	0.00525346
GLIS2	206.803	2.3199	0.211738	10.9565	6.18699e-28	9.08864e-26
GLRA4	47.6316	-2.70079	0.450031	-6.00135	1.95683e-09	5.46601e-08
GLRX2	54.6626	2.05304	0.380676	5.39315	6.92322e-08	1.53658e-06
GLUD2	78.0282	2.93226	0.349099	8.39953	4.48266e-17	2.92432e-15
GLUL	3660.36	1.0479	0.0971602	10.7853	4.04052e-27	5.4638e-25
GLYATL1	112.91	2.49174	0.392927	6.34148	2.27567e-10	7.364e-09
GLYATL1P1	5.76332	3.04423	1.13068	2.69238	0.00709436	0.042037
GLYATL1P2	45.9973	2.55056	0.569322	4.47999	7.46476e-06	0.000109186
GLYATL2	27.0448	2.36886	0.529864	4.4707	7.79655e-06	0.000113308
GLYCTK	92.2037	0.917458	0.28743	3.19194	0.00141323	0.010943
GMPR	63.3178	-1.0569	0.382779	-2.76111	0.00576051	0.0354182
GNAL	296.025	-0.654116	0.179671	-3.64063	0.000271971	0.0026496
GNAO1	86.4354	-1.25345	0.379541	-3.30253	0.000958168	0.0078322
GNG11	34.8429	1.8861	0.446758	4.22176	2.42406e-05	0.00031248
GNG12.AS1	29.4368	-1.40495	0.507339	-2.76926	0.00561835	0.0347534
GNG2	107.209	1.9267	0.33186	5.80576	6.40745e-09	1.66244e-07
GNG4	94.6904	-0.90198	0.281699	-3.20193	0.00136508	0.0106104
GNG5	108.602	-2.09725	0.272562	-7.69459	1.41954e-14	7.22831e-13
GNL1	457.135	0.978966	0.148613	6.58736	4.47709e-11	1.58436e-09
GNL3L	244.505	0.583945	0.184243	3.16942	0.00152743	0.0116899
GNPNAT1	485.146	-0.783386	0.17887	-4.37963	1.18883e-05	0.00016638
GOLGA2P10	104.991	0.908629	0.273798	3.31862	0.000904645	0.00746342
GOLGA6L9	68.9216	1.32809	0.336515	3.94661	7.92658e-05	0.000908775
GOLGA8A	232.817	-0.674791	0.199371	-3.3846	0.000712829	0.00610539
GOLGA8B	261.187	-1.15578	0.200652	-5.76014	8.40425e-09	2.15586e-07
GON7	24.4386	3.2719	0.642183	5.09496	3.48809e-07	6.66885e-06
GPAM	430.791	-0.856539	0.166637	-5.14015	2.74516e-07	5.34861e-06
GPANK1	139.83	2.95066	0.255546	11.5465	7.69097e-31	1.37756e-28
GPC3	1285.59	0.999008	0.210064	4.75572	1.97736e-06	3.2906e-05
GPC4	984.588	-1.09709	0.157861	-6.94972	3.66014e-12	1.48287e-10
GPD1	10.3197	3.12241	0.83873	3.72279	0.000197035	0.00200362
GPR153	112.832	-1.10827	0.291928	-3.79639	0.000146816	0.00154528
GPR157	76.9329	0.94982	0.309503	3.06885	0.00214882	0.015587
GPR160	30.3211	1.92381	0.520447	3.69645	0.000218636	0.00219594
GPR176	450.227	0.98445	0.161027	6.11357	9.74289e-10	2.87902e-08
GPR20	37.8353	5.8404	0.937679	6.22857	4.70709e-10	1.44533e-08
GPR39	16.9854	2.57561	0.708545	3.63507	0.000277907	0.00269193
GPRC5C	754.891	0.956983	0.170617	5.60897	2.03534e-08	4.95347e-07
GPRIN1	70.6946	-0.928957	0.306773	-3.02816	0.00246047	0.0174506
GPRIN2	90.4988	0.922524	0.327924	2.81322	0.00490475	0.0309583
GPRIN3	56.1072	1.4744	0.356371	4.13726	3.51483e-05	0.000438688
GPSM2	155.483	-0.796197	0.234582	-3.39412	0.000688502	0.00593544
GPSM3	48.0029	1.89337	0.374639	5.05386	4.3297e-07	8.16089e-06
GPX3	255.516	-0.591518	0.214462	-2.75814	0.0058131	0.0356771
GRB14	139.946	1.55806	0.261425	5.95989	2.52406e-09	6.94593e-08
GRB7	133.817	2.15606	0.318273	6.77424	1.25062e-11	4.79199e-10
GREB1L	1095.74	-0.708315	0.218408	-3.24308	0.00118247	0.00942039
GREM1	69.441	5.48248	0.873675	6.2752	3.49192e-10	1.09864e-08
GRHL1	18.8493	1.84712	0.590754	3.12671	0.00176774	0.0132218
GRHL2	143.42	1.11873	0.347314	3.22109	0.00127702	0.0100291
GRID1	35.6444	-1.42396	0.508438	-2.80065	0.00509993	0.0320122
GRID2	110.467	-1.63942	0.266622	-6.14886	7.80442e-10	2.33663e-08
GRIK3	546.575	-1.62163	0.523444	-3.098	0.00194829	0.0143514
GRIN2B	70.5078	-1.1085	0.321878	-3.44384	0.000573517	0.00504769
GRINA	1306.03	0.644608	0.128047	5.03417	4.7993e-07	8.95767e-06
GRIP1	149.224	0.768882	0.244141	3.14933	0.00163644	0.0124125
GRIP2	41.3741	-1.36843	0.477963	-2.86304	0.00419602	0.0271995
GRK5	196.129	0.875812	0.260018	3.36827	0.000756418	0.00642751
GRM4	177.286	-3.22474	0.260883	-12.3609	4.25588e-35	9.46519e-33
GSDMD	100.261	1.08649	0.321403	3.38047	0.000723617	0.00618482
GSTA2	10.7195	3.94509	1.00556	3.92326	8.73592e-05	0.000985518
GSTM3	40.5383	1.17024	0.408002	2.86822	0.0041279	0.0267979
GSTO2	95.2475	-1.81004	0.297903	-6.07594	1.23262e-09	3.56501e-08
GTF2IP1	30.1798	-1.29407	0.472171	-2.74069	0.00613106	0.0372257
GTPBP8	82.0721	0.988473	0.298221	3.31456	0.00091786	0.00754804
GUCY1A2	63.6771	1.73877	0.405092	4.29229	1.76839e-05	0.00023585
GULP1	462.473	-0.946152	0.175411	-5.39391	6.89414e-08	1.53214e-06
GXYLT2	59.6743	1.0306	0.39236	2.62668	0.00862236	0.0492889
GYPC	212.899	-1.92892	0.264516	-7.29226	3.048e-13	1.37389e-11
GYPE	56.8812	-1.5437	0.384754	-4.01216	6.01647e-05	0.000706618
H19	160.551	-7.49502	0.674171	-11.1174	1.03258e-28	1.62186e-26
H1FX	854.459	0.594979	0.119333	4.98588	6.16806e-07	1.13159e-05
H3F3A	978.72	-1.40046	0.126817	-11.0432	2.36514e-28	3.63112e-26
H6PD	1110.43	1.22953	0.123065	9.99092	1.67022e-23	1.88421e-21
HABP2	156.262	5.71876	1.85107	3.08943	0.00200544	0.0147035
HAGHL	29.3444	-2.18319	0.532976	-4.09622	4.19946e-05	0.000512545
HAND2	293.062	3.11166	0.208336	14.9358	1.92699e-50	8.19733e-48
HAND2.AS1	89.347	2.80039	0.346233	8.08816	6.05735e-16	3.45489e-14
HAS2	3888.59	-1.43915	0.173843	-8.27845	1.24785e-16	7.74466e-15
HAVCR1	10.6461	2.5885	0.868255	2.98127	0.00287056	0.0198557
HCG18	325.641	3.96911	0.206667	19.2054	3.33766e-82	2.83965e-79
HCG25	4.25008	5.78439	1.87856	3.07915	0.00207589	0.0151493
HCN2	25.1678	-2.24989	0.569892	-3.94791	7.88351e-05	0.000904854
HCN3	49.977	1.87089	0.385537	4.85269	1.218e-06	2.10944e-05
HCP5	9.98531	4.88918	1.28721	3.79827	0.00014571	0.00153466
HDAC9	36.6187	-1.3834	0.49264	-2.80814	0.0049829	0.0313837
HELLPAR	57.7987	-1.20315	0.354872	-3.39039	0.000697936	0.00599796
HES4	45.8331	-1.22033	0.404808	-3.01459	0.00257325	0.0181308
HEY1	236.222	-1.25458	0.308442	-4.06748	4.75233e-05	0.000572833
HGF	10.8949	-2.61002	0.86671	-3.01141	0.00260035	0.0182651
HGSNAT	383.963	0.957938	0.161154	5.94424	2.77745e-09	7.58192e-08
HHEX	244.219	1.75144	0.640244	2.73558	0.00622698	0.0376761
HHIPL1	25.6216	-1.56518	0.562502	-2.78254	0.00539358	0.0335358
HHLA1	3.15197	-5.37602	2.05046	-2.62185	0.00874528	0.0498534
HIBADH	449.963	0.932002	0.148791	6.26384	3.75605e-10	1.1763e-08
HIBCH	192.577	0.682295	0.210988	3.23381	0.0012215	0.00967298
HID1	190.931	2.21595	0.321626	6.88981	5.58653e-12	2.22362e-10
HINT2	17.4978	-1.68041	0.626455	-2.68242	0.00730926	0.0430729
HIST2H2BC	39.835	4.13092	0.63658	6.48924	8.62701e-11	2.93204e-09
HIST2H2BD	12.8446	3.35568	0.925681	3.6251	0.000288852	0.00277818
HIVEP2	242.347	-1.58523	0.243869	-6.50035	8.01334e-11	2.74078e-09
HLA.A	620.81	1.44567	0.147535	9.79888	1.13846e-22	1.18603e-20
HLA.B	801.646	3.70733	0.431949	8.58281	9.25866e-18	6.43036e-16
HLA.C	638.588	6.29949	0.211801	29.7425	2.16545e-194	1.10541e-190
HLA.DOA	67.6009	4.23818	0.38935	10.8853	1.35494e-27	1.90804e-25
HLA.DPA1	19.5067	2.86553	0.593166	4.83091	1.35908e-06	2.31645e-05
HLA.DPB1	47.5353	1.97455	0.381936	5.16986	2.34274e-07	4.6174e-06
HLA.DQB1	14.7141	2.10342	0.632804	3.32396	0.000887476	0.00735446
HLA.DRB1	19.3569	5.24124	0.823724	6.36286	1.98027e-10	6.47998e-09
HLA.DRB5	4.04242	6.78881	1.92081	3.53435	0.000408781	0.00376665
HLA.DRB6	2.38209	6.52152	2.1279	3.06477	0.00217835	0.0157501
HLA.E	380.57	2.5212	0.158502	15.9064	5.71747e-57	3.15527e-54
HLA.H	48.4406	10.4627	1.48462	7.0474	1.8229e-12	7.62741e-11
HLA.J	4.92006	5.32984	1.75157	3.04289	0.00234315	0.0167406
HLA.L	33.2728	3.21889	0.502335	6.40785	1.47583e-10	4.90799e-09
HMGA2	1454.08	-0.838918	0.126908	-6.61045	3.83142e-11	1.37012e-09
HMGCS2	64.1846	7.31196	0.617581	11.8397	2.43353e-32	4.64395e-30
HMGN2P5	11.9687	7.79631	1.63348	4.77283	1.81656e-06	3.03329e-05
HMOX1	43.6604	1.66278	0.391641	4.24568	2.17929e-05	0.000284537
HMOX2	89.7172	1.27072	0.309331	4.10796	3.99176e-05	0.000489734
HNF1A	11.8925	2.8843	1.00643	2.86586	0.00415874	0.026975
HNF1A.AS1	106.439	3.54344	0.539031	6.57373	4.9071e-11	1.73054e-09
HNF1B	408.548	4.15093	0.449417	9.23626	2.55263e-20	2.19924e-18
HNF4A	202.925	3.35952	0.934941	3.59329	0.000326529	0.00309535
HNF4G	18.1097	1.80585	0.588444	3.06885	0.00214885	0.015587
HNMT	54.2661	-1.82243	0.372682	-4.89003	1.00822e-06	1.76863e-05
HNRNPCP2	42.0045	1.68906	0.410385	4.1158	3.85841e-05	0.000476041
HNRNPH1P3	2.67044	-5.55204	2.08681	-2.66054	0.00780149	0.0453842
HNRNPKP1	7.3971	5.82928	1.66837	3.49401	0.000475826	0.00428768
HNRNPKP2	5.50521	3.78771	1.29408	2.92695	0.00342309	0.0228867
HNRNPLP2	17.1035	1.72155	0.629428	2.7351	0.00623618	0.0377182
HOXA1	21.6389	-4.28356	1.53604	-2.7887	0.00529201	0.0330302
HOXB1	29.694	-2.38618	0.582379	-4.09729	4.18012e-05	0.00051049
HOXB4	57.7513	2.1828	0.441843	4.94021	7.80387e-07	1.40024e-05
HOXB5	15.3392	1.92941	0.634513	3.04078	0.00235969	0.0168352
HOXB6	7.06428	3.55784	1.09212	3.25773	0.00112308	0.00900003
HPD	10.0273	2.37266	0.828161	2.86498	0.00417035	0.0270417
HPDL	52.9749	-1.21251	0.405356	-2.99122	0.00277865	0.0192853
HPGD	15.011	-2.41352	0.736383	-3.27754	0.00104717	0.00844808
HPN	289.675	1.21571	0.281563	4.31771	1.57653e-05	0.000212623
HPX	62.019	2.26152	0.449039	5.03635	4.74487e-07	8.86933e-06
HRAS	129.547	0.747333	0.24621	3.03535	0.0024026	0.0171174
HS3ST3A1	189.13	-0.685402	0.233179	-2.93939	0.00328862	0.022183
HS6ST1P1	11.215	3.86737	0.833397	4.64049	3.47586e-06	5.49757e-05
HSD11B2	38.3653	1.24852	0.467523	2.67049	0.00757402	0.0443516
HSD3BP5	21.6842	1.89711	0.667632	2.84154	0.00448956	0.0287825
HSP90AA2P	12.2168	2.43635	0.80002	3.04537	0.00232398	0.0166201
HSP90AB3P	28.6008	2.42898	0.501434	4.84406	1.27215e-06	2.19392e-05
HSPA12A	143.756	0.691699	0.221836	3.11806	0.00182043	0.0135761
HSPA12B	34.9392	-1.39402	0.449484	-3.10138	0.00192624	0.0142095
HSPA14	232.877	0.665292	0.186761	3.56227	0.000367665	0.00342958
HSPA1A	41.8543	4.17805	0.605873	6.89591	5.35218e-12	2.14286e-10
HSPA1B	72.9663	8.95184	1.42483	6.28277	3.32601e-10	1.05293e-08
HSPA1L	12.1218	3.38533	0.862799	3.92366	8.72124e-05	0.00098495
HSPA2	131.985	-2.60849	0.274574	-9.50013	2.09623e-21	1.99083e-19
HSPB7	23.5506	2.90737	0.67049	4.33618	1.44978e-05	0.000198014
HSPG2	8361.22	0.779986	0.119853	6.50784	7.62393e-11	2.61196e-09
HTR7	33.9437	-2.5399	0.48749	-5.21015	1.88687e-07	3.80712e-06
HYDIN	21.7582	-1.84887	0.585624	-3.15709	0.00159354	0.0121367
IBTK	400.89	-1.11356	0.180755	-6.16062	7.24623e-10	2.17589e-08
ID2	1091.28	1.35284	0.217131	6.23053	4.64865e-10	1.43169e-08
ID2.AS1	85.4973	2.31292	0.350021	6.60797	3.89636e-11	1.39091e-09
ID3	783.086	-0.636068	0.126382	-5.03289	4.8314e-07	8.99291e-06
ID4	838.187	0.701426	0.19667	3.56651	0.00036177	0.00338077
IDH2	750.573	1.28314	0.167244	7.67223	1.69031e-14	8.54317e-13
IER3	30.7884	2.41789	0.572334	4.22461	2.3935e-05	0.000309127
IER5L	172.929	-0.922652	0.237029	-3.89258	9.91845e-05	0.00109591
IFFO1	170.776	-0.654573	0.232616	-2.81397	0.00489341	0.0309059
IFFO2	99.3474	-0.947762	0.276368	-3.42934	0.000605044	0.00530915
IFI27	17.2166	2.93208	0.723816	4.05086	5.10292e-05	0.00060898
IFI27L1	76.1515	1.70661	0.321925	5.30128	1.14993e-07	2.44079e-06
IFITM1	290.343	-1.54833	0.172621	-8.96955	2.97727e-19	2.31152e-17
IFNAR2	27.5943	-2.03017	0.496138	-4.09194	4.27772e-05	0.000521162
IFNGR2	218.513	1.19642	0.188904	6.33351	2.39643e-10	7.74251e-09
IGF1	6.24533	5.2461	1.25226	4.18929	2.7983e-05	0.000356225
IGF2	677.853	-2.90716	0.494686	-5.87677	4.18345e-09	1.11226e-07
IGFBP3	626.519	3.35995	0.729422	4.60632	4.0985e-06	6.34475e-05
IGFBP5	399.581	3.806	0.52333	7.27266	3.52473e-13	1.568e-11
IGFBP6	169.388	2.48735	0.250656	9.92337	3.29453e-23	3.59738e-21
IGFBPL1	124.528	-1.55026	0.28884	-5.36718	7.99781e-08	1.75411e-06
IGSF10	26.9383	2.54653	0.49375	5.15753	2.50233e-07	4.913e-06
IGSF21	23.0493	1.66553	0.534721	3.11476	0.00184097	0.0137043
IL10RB	10.3785	-3.03425	0.90498	-3.35284	0.000799871	0.00673231
IL17RD	793.676	-0.849186	0.146088	-5.81282	6.14275e-09	1.59986e-07
IL6ST	966.992	0.640278	0.169339	3.78104	0.000156175	0.00163368
IMPA1	174.653	-0.69508	0.222678	-3.12146	0.00179956	0.0134352
IMPDH1P5	10.3202	6.17966	1.66358	3.71468	0.000203464	0.00205975
INAFM2	268.59	-0.805709	0.201317	-4.00218	6.27618e-05	0.000733143
INHBA	18.46	-1.81257	0.681729	-2.65878	0.00784231	0.0455957
INPP5F	1125.84	-0.745709	0.122848	-6.07019	1.27756e-09	3.68974e-08
INSIG2	153.624	0.718263	0.228296	3.14619	0.00165411	0.0125187
INSRR	102.096	-1.90382	0.315761	-6.02928	1.64688e-09	4.6705e-08
INTS3	1033.2	0.974426	0.133771	7.28427	3.23427e-13	1.44826e-11
IPO5P1	238.867	0.691398	0.23782	2.90723	0.0036465	0.0241589
IQANK1	34.3534	4.16542	0.580547	7.175	7.23086e-13	3.11491e-11
IQGAP2	195.721	-0.955653	0.231104	-4.13517	3.54698e-05	0.00044216
IQSEC3	18.2634	-1.96056	0.671448	-2.9199	0.0035014	0.0233035
IRF2	73.0057	0.812234	0.292465	2.7772	0.00548293	0.034037
IRF6	149.612	1.18537	0.28074	4.22231	2.41812e-05	0.000312109
IRX2	230.305	-1.12136	0.29558	-3.79377	0.000148375	0.00156008
IRX3	610.117	-2.59299	0.242503	-10.6926	1.10261e-26	1.43402e-24
IRX5	197.343	-2.79898	0.36052	-7.76374	8.24578e-15	4.27336e-13
ISLR	20.1716	-2.43198	0.723832	-3.35986	0.000779812	0.00658247
ISX	12.9065	4.23425	0.890827	4.75316	2.00258e-06	3.32444e-05
ISYNA1	3538.62	-1.55866	0.16209	-9.61603	6.84209e-22	6.65279e-20
ITFG2.AS1	3.09666	6.20551	1.97746	3.13812	0.00170038	0.0127976
ITGA2B	50.8557	-1.27575	0.362973	-3.51472	0.000440215	0.00401642
ITGA3	261.455	0.961271	0.222868	4.31319	1.60919e-05	0.000216742
ITGA8	501.713	-1.2316	0.410015	-3.00379	0.00266638	0.0186505
ITGA9	472.814	-1.30557	0.228314	-5.71832	1.07582e-08	2.72884e-07
ITGAV	1541.1	0.588049	0.140293	4.19158	2.77014e-05	0.00035308
ITGB4	42.2905	1.56391	0.40251	3.88538	0.000102169	0.00112402
ITIH5	81.1935	0.938078	0.282871	3.31628	0.000912251	0.00751402
ITLN1	5.80148	4.15888	1.26596	3.28517	0.00101921	0.00827488
ITM2A	51.1284	-1.09964	0.386544	-2.8448	0.00444388	0.0285794
ITPK1	418.518	1.89369	0.173241	10.931	8.19518e-28	1.17019e-25
ITPR3	1017.79	0.753234	0.208347	3.61528	0.000300028	0.00287348
JADE1	980.145	1.06356	0.130161	8.1711	3.05592e-16	1.80344e-14
JADE2	181.72	-1.04564	0.204351	-5.11691	3.10577e-07	6.00538e-06
JAG1	1792.26	-2.55794	0.602482	-4.24567	2.17942e-05	0.000284537
JAKMIP1	15.0457	-5.20996	1.08463	-4.80345	1.55952e-06	2.63827e-05
JPH2	394.813	-0.866866	0.205793	-4.21232	2.52763e-05	0.000324602
JPH4	39.0473	-2.88953	0.488333	-5.91714	3.27594e-09	8.8598e-08
JRK	660.989	-0.689991	0.137646	-5.01281	5.36412e-07	9.94822e-06
JTB	101.778	-2.05992	0.275368	-7.48058	7.39928e-14	3.53004e-12
JUN	162.699	0.926529	0.252678	3.66683	0.000245572	0.00243651
JUP	4363.91	0.98497	0.105117	9.37019	7.24015e-21	6.54144e-19
KALRN	390.761	0.87586	0.163559	5.35503	8.55441e-08	1.87016e-06
KANK1	1721.79	0.918018	0.135283	6.78593	1.15344e-11	4.46062e-10
KANK4	32.0633	2.11257	0.560607	3.76836	0.000164326	0.00170843
KANSL1	734.707	2.96589	0.225151	13.1729	1.25705e-39	3.71994e-37
KANSL1.AS1	17.4641	5.12978	1.19213	4.30304	1.6847e-05	0.000225721
KAT14	219.035	0.768251	0.195638	3.92691	8.60449e-05	0.00097338
KAZALD1	75.6841	1.22105	0.364807	3.34711	0.00081659	0.00685325
KAZN	326.826	-0.92753	0.216931	-4.2757	1.90538e-05	0.000251982
KBTBD11	136.722	7.43891	0.590926	12.5886	2.44021e-36	5.59849e-34
KCNA1	53.1454	-4.03888	0.481041	-8.39611	4.6151e-17	3.00114e-15
KCNA2	18.5726	-1.96568	0.714452	-2.75131	0.00593574	0.036304
KCNA3	6.60659	-3.973	1.3636	-2.91361	0.00357272	0.0237317
KCNA5	27.7307	-1.63136	0.609784	-2.67531	0.00746591	0.0438788
KCND2	10.7971	-3.17143	0.908342	-3.49144	0.000480419	0.00432335
KCNH6	17.4491	1.73273	0.604475	2.8665	0.00415037	0.0269292
KCNIP3	18.9615	-2.13973	0.686448	-3.1171	0.00182637	0.0136154
KCNJ12	94.9749	-2.17038	0.379626	-5.71716	1.08321e-08	2.74419e-07
KCNJ5	159.636	-2.757	0.287158	-9.60097	7.91978e-22	7.66417e-20
KCNK1	196.454	1.33949	0.284599	4.70659	2.51892e-06	4.09831e-05
KCNK10	6.9671	3.49319	1.10326	3.16625	0.0015442	0.0118094
KCNK12	500.8	0.743234	0.139107	5.34288	9.14825e-08	1.98721e-06
KCNMA1	108.784	1.22486	0.426229	2.87372	0.00405667	0.0264052
KCNMB4	284.433	-1.59509	0.202861	-7.86297	3.75145e-15	1.98448e-13
KCNQ1	26.9883	2.21752	0.515262	4.30367	1.67994e-05	0.000225231
KCNQ5	81.2276	-1.4877	0.371313	-4.00658	6.16041e-05	0.000721684
KCNT2	140.161	-0.797116	0.265227	-3.00541	0.00265225	0.0185657
KCNV1	53.467	2.35842	0.429694	5.48862	4.05094e-08	9.46408e-07
KCP	430.678	-1.46402	0.157172	-9.31473	1.22267e-20	1.08077e-18
KCTD1	102.88	1.15034	0.275347	4.17778	2.94362e-05	0.000372403
KCTD11	164.771	0.807129	0.216333	3.73096	0.000190751	0.00194489
KCTD12	312.091	1.39288	0.218551	6.37324	1.85074e-10	6.0854e-09
KCTD9	150.452	-0.66246	0.229619	-2.88504	0.00391362	0.0256655
KDELC2	447.988	0.890505	0.150223	5.92789	3.06844e-09	8.33171e-08
KDM4A	430.892	-0.995706	0.148267	-6.71563	1.87259e-11	6.95207e-10
KDR	3836.51	1.20039	0.106269	11.2958	1.37602e-29	2.28431e-27
KIAA0040	89.0421	1.01594	0.344841	2.94611	0.00321801	0.0217871
KIAA0355	622.859	1.25194	0.140725	8.89636	5.77102e-19	4.39696e-17
KIAA0895	128.507	1.38085	0.260081	5.3093	1.10047e-07	2.34557e-06
KIAA0895L	270.294	-0.649999	0.210603	-3.08637	0.00202619	0.0148343
KIAA1147	962.738	3.62126	0.141681	25.5593	4.33196e-144	1.47424e-140
KIAA1217	646.457	1.0961	0.221573	4.94688	7.54106e-07	1.36025e-05
KIAA1324	106.15	2.31706	0.31953	7.25148	4.12245e-13	1.80636e-11
KIAA1549L	157.861	-0.804944	0.252484	-3.1881	0.0014321	0.011064
KIAA1671	786.168	0.671607	0.135976	4.93917	7.84552e-07	1.40648e-05
KIF12	130.818	2.73772	0.642919	4.25827	2.06014e-05	0.000270695
KIF13B	324.949	1.12345	0.215967	5.20195	1.97211e-07	3.96343e-06
KIF15	232.573	-0.595117	0.210245	-2.83059	0.00464618	0.0296192
KIF21A	477.123	1.60717	0.221147	7.26745	3.66342e-13	1.62263e-11
KIF26B	325.659	1.36159	0.291082	4.67767	2.90159e-06	4.65051e-05
KIFAP3	339.414	1.54688	0.226076	6.8423	7.7931e-12	3.05427e-10
KIFC1	597.481	1.38335	0.16047	8.62064	6.65812e-18	4.72056e-16
KIFC3	166.106	0.6956	0.261733	2.65767	0.00786818	0.0456949
KL	2.75459	5.58184	2.05088	2.72168	0.00649515	0.0390072
KLF13	360.065	4.10732	0.195602	20.9984	6.78361e-98	8.65716e-95
KLF2	4.85178	7.77285	1.85346	4.1937	2.74443e-05	0.00035024
KLF4	130.251	0.721334	0.243416	2.96338	0.00304283	0.0208007
KLF6	361.148	0.651057	0.170439	3.81988	0.000133518	0.00141995
KLHDC7A	51.2076	1.25514	0.475609	2.63902	0.00831467	0.0478515
KLHL17	202.664	-0.847011	0.233168	-3.63262	0.000280556	0.00270988
KLHL29	62.5717	-1.2674	0.350966	-3.61116	0.000304828	0.00291127
KLHL3	245.811	0.939682	0.220503	4.26154	2.03027e-05	0.000267287
KLHL4	270.587	-0.959548	0.243215	-3.94526	7.97129e-05	0.000911398
KLHL5	516.207	0.722252	0.147502	4.89656	9.75303e-07	1.71975e-05
KLK6	31.0859	-2.13872	0.569177	-3.75757	0.000171573	0.00177309
KLK7	3.07981	-5.59362	2.02273	-2.76539	0.00568554	0.0350797
KLKB1	16.8159	-3.57618	0.758835	-4.71273	2.44424e-06	3.98952e-05
KNTC1	954.407	-0.621102	0.132298	-4.69473	2.66954e-06	4.31928e-05
KPTN	153.244	-0.619527	0.218205	-2.8392	0.00452266	0.0289508
KRIT1	98.8027	-2.44626	0.303306	-8.06531	7.3048e-16	4.14324e-14
KRT19	6731.63	1.04624	0.139668	7.49096	6.83721e-14	3.27721e-12
KRT79	2.63544	5.61494	2.07651	2.70403	0.00685048	0.0408647
KRT8P3	62.7049	0.936168	0.345466	2.70987	0.006731	0.0402814
KTI12	33.0321	-1.51585	0.448259	-3.38165	0.000720518	0.0061629
KTN1.AS1	87.6564	1.15246	0.297687	3.87137	0.000108225	0.0011811
L1CAM	271.468	-1.54891	0.194064	-7.98145	1.44619e-15	7.89566e-14
L3MBTL3	117.398	0.733574	0.245008	2.99408	0.00275276	0.0191447
LAMA1	8712.69	1.26073	0.0974074	12.9428	2.57975e-38	7.21588e-36
LAMA2	55.7917	-1.51374	0.361477	-4.18764	2.81868e-05	0.000358182
LAMB1	4581.78	1.3179	0.122119	10.792	3.75726e-27	5.14896e-25
LAMC3	235.962	-0.83038	0.208199	-3.98841	6.65186e-05	0.000775253
LANCL3	6.32722	2.90778	1.06394	2.73302	0.00627562	0.0379118
LAPTM5	9.87555	3.74672	0.865339	4.32978	1.49261e-05	0.000202374
LCK	28.3997	-1.81788	0.524541	-3.46567	0.000528917	0.00471223
LCP1	192.529	1.78601	0.259675	6.87788	6.07484e-12	2.40392e-10
LCP2	2.36871	7.01951	2.35893	2.97572	0.00292301	0.020157
LDB2	139.131	-1.24023	0.241092	-5.14422	2.6863e-07	5.24878e-06
LDHA	2886.88	-1.14144	0.163522	-6.98031	2.9452e-12	1.21002e-10
LDHAP4	21.3724	-1.96469	0.589076	-3.3352	0.000852383	0.00711562
LDHB	960.417	-3.90977	0.192464	-20.3143	9.61402e-92	9.81544e-89
LEF1	535.189	-1.30093	0.237793	-5.47085	4.47871e-08	1.03686e-06
LEFTY2	220.112	-9.19005	0.868231	-10.5848	3.50556e-26	4.47375e-24
LENG8	1230.43	1.26078	0.128832	9.78624	1.2901e-22	1.33718e-20
LENG8.AS1	19.1689	7.18684	1.49902	4.79436	1.63199e-06	2.74947e-05
LENG9	18.5405	8.69084	1.54431	5.62766	1.82669e-08	4.46696e-07
LGALS3BP	368.579	0.813122	0.180337	4.5089	6.51634e-06	9.71219e-05
LGI1	8.1776	-6.75774	1.68439	-4.01197	6.02142e-05	0.000706618
LGI2	413.793	2.39378	0.715252	3.34676	0.000817618	0.00685905
LHFPL6	55.7776	-1.82838	0.407328	-4.48872	7.16528e-06	0.000105333
LHX6	33.2984	1.58733	0.544287	2.91634	0.0035416	0.0235557
LIFR	3058.52	1.42944	0.113345	12.6115	1.826e-36	4.33549e-34
LIFR.AS1	35.7506	1.90823	0.463704	4.1152	3.86846e-05	0.000476705
LIMD2	153.189	-0.695668	0.223948	-3.10639	0.00189387	0.0140169
LIN28B	1466.11	-0.602143	0.147159	-4.09178	4.28076e-05	0.000521221
LIN7A	241.378	-0.85103	0.211216	-4.02919	5.59683e-05	0.000662887
LINC00173	48.0172	1.11556	0.41827	2.6671	0.00765098	0.0446614
LINC00205	603.514	2.66597	0.153647	17.3513	1.92871e-67	1.31274e-64
LINC00235	12.6688	7.58676	1.60143	4.7375	2.16371e-06	3.56585e-05
LINC00242	5.08243	7.71483	1.80159	4.28225	1.85016e-05	0.000245793
LINC00294	149.581	0.608592	0.229023	2.65734	0.00787602	0.0457266
LINC00339	29.4709	-1.42548	0.493195	-2.89029	0.00384886	0.0252945
LINC00348	7.55566	3.89545	1.09606	3.55404	0.000379357	0.00352095
LINC00458	318.291	-1.49772	0.286953	-5.21938	1.79523e-07	3.6402e-06
LINC00479	28.9198	2.5092	0.531913	4.71731	2.38985e-06	3.91013e-05
LINC00511	24.4308	2.99975	0.598943	5.00841	5.48823e-07	1.01599e-05
LINC00574	2.76878	6.78457	2.12671	3.19018	0.00142185	0.0109931
LINC00632	56.3324	2.85166	0.42068	6.77869	1.21271e-11	4.67213e-10
LINC00664	20.0859	-7.38106	1.5335	-4.81321	1.48522e-06	2.51883e-05
LINC00678	9.90962	-3.24305	0.958919	-3.38199	0.000719637	0.00615853
LINC00680	11.1553	-6.2952	1.63493	-3.85045	0.000117901	0.00127153
LINC00698	5.86506	-4.31594	1.46337	-2.94931	0.00318484	0.0216338
LINC00941	5.50351	-6.88444	1.84634	-3.72869	0.000192474	0.00196017
LINC01115	5.12697	5.9921	1.85931	3.22275	0.00126966	0.00998278
LINC01128	142.943	0.759447	0.250021	3.03753	0.00238528	0.0170059
LINC01198	16.0668	6.18988	1.02948	6.01262	1.82553e-09	5.1273e-08
LINC01238.1	4.42944	6.01012	1.97022	3.05049	0.00228469	0.0164128
LINC01521	84.7725	1.0071	0.301864	3.33626	0.000849123	0.00709131
LINC01630	9.59839	-2.42274	0.875754	-2.76646	0.00566691	0.0349797
LINC01828	9.24731	-4.93163	1.26729	-3.89149	9.96322e-05	0.00109967
LINC01829	5.1992	-3.46479	1.31996	-2.62492	0.00866681	0.0494876
LINC02038	5.68962	3.56432	1.29631	2.74959	0.00596701	0.0364246
LINC02210	367.302	6.10132	0.302092	20.1969	1.0433e-90	1.01444e-87
LINC02381	27.2851	2.1091	0.495418	4.25721	2.06997e-05	0.000271812
LINC02413	12.233	2.43646	0.905386	2.69108	0.00712215	0.0421895
LINC02521	2.36906	5.77641	2.14817	2.68899	0.00716676	0.0423923
LINGO1	179.698	-0.758179	0.241238	-3.14286	0.00167306	0.012648
LIPA	154.181	-0.774246	0.228436	-3.38934	0.000700613	0.00601843
LIX1	2227.24	-1.91502	0.365001	-5.24661	1.54927e-07	3.20187e-06
LIX1L	228.216	-1.09267	0.264015	-4.13864	3.49367e-05	0.00043658
LLCFC1	7.197	5.67454	1.71036	3.31776	0.000907435	0.00748039
LLGL2	1400.84	1.14487	0.188361	6.07808	1.21632e-09	3.52784e-08
LMBRD1	160.485	0.907486	0.241097	3.76399	0.000167226	0.00173594
LMLN2	152.22	-2.44097	0.287259	-8.49748	1.93757e-17	1.31004e-15
LMNB1	1920.69	-0.616023	0.104037	-5.92122	3.19556e-09	8.65388e-08
LMNTD2	35.2791	3.36252	0.516111	6.5151	7.26389e-11	2.49699e-09
LMO2	48.3249	3.00352	0.398723	7.53285	4.96446e-14	2.41356e-12
LMO3	36.894	1.57201	0.555832	2.8282	0.00468102	0.0297856
LNCPRESS2	3.89294	-5.98018	1.91018	-3.13069	0.00174399	0.0130777
LNPK	197.425	0.801367	0.194122	4.12817	3.65664e-05	0.000453535
LOX	61.2317	-3.464	0.415894	-8.32904	8.14976e-17	5.16801e-15
LOXL1	398.728	0.99524	0.170675	5.83119	5.50343e-09	1.4444e-07
LPAR4	24.1742	-1.65675	0.619965	-2.67233	0.00753273	0.0441604
LPAR5	22.8574	2.01752	0.558483	3.6125	0.000303261	0.00289978
LPAR6	30.9287	1.2878	0.49069	2.62447	0.00867828	0.0495254
LPCAT1	1020.4	1.40307	0.142546	9.84297	7.35104e-23	7.77725e-21
LPIN2	624.189	0.588437	0.135168	4.35339	1.34048e-05	0.000184567
LRCH1	231.353	1.09176	0.206688	5.28216	1.27673e-07	2.68481e-06
LRCH2	64.7939	1.02611	0.351877	2.91611	0.00354427	0.0235658
LRIG1	353.231	-0.878919	0.167783	-5.23841	1.61963e-07	3.32374e-06
LRIG3	1023.09	-1.50835	0.139844	-10.7859	4.01103e-27	5.46008e-25
LRP10	510.378	-0.594857	0.150761	-3.94569	7.957e-05	0.000910729
LRP11	40.9547	-2.26365	0.441653	-5.1254	2.96904e-07	5.74642e-06
LRP1B	265.854	1.61743	0.570105	2.83707	0.00455294	0.0291249
LRP5	1231.38	0.767306	0.158278	4.84783	1.24819e-06	2.15624e-05
LRP8	287.771	-2.79357	0.22944	-12.1756	4.19175e-34	8.82385e-32
LRRC1	126.683	0.862562	0.233876	3.68812	0.000225916	0.00225828
LRRC15	15.1479	-2.58539	0.871185	-2.96767	0.00300066	0.0206145
LRRC2	45.3186	-1.7229	0.396781	-4.34219	1.41071e-05	0.000193453
LRRC3	316.298	-1.3884	0.265185	-5.23561	1.64437e-07	3.37112e-06
LRRC32	735.505	0.997681	0.141858	7.03297	2.02186e-12	8.40824e-11
LRRC37A2	41.9906	5.70465	0.766293	7.44447	9.73347e-14	4.59002e-12
LRRC37A3	19.1294	1.57359	0.589522	2.66927	0.00760173	0.0444756
LRRC37A9P	7.96436	4.41972	1.32614	3.33278	0.000859833	0.00716902
LRRC55	55.8366	-2.1163	0.422258	-5.01185	5.39081e-07	9.98865e-06
LRRC61	45.0712	-3.44042	0.52735	-6.52399	6.84632e-11	2.37343e-09
LRRC75B	204.546	0.619676	0.192843	3.21338	0.00131183	0.0102669
LRRC8C	93.0421	0.877014	0.279316	3.13987	0.00169024	0.0127496
LRRC8D	223.109	0.86618	0.183145	4.72947	2.25106e-06	3.7068e-05
LRRK2	14.9127	2.36217	0.740162	3.19143	0.00141571	0.0109581
LRRN2	195.501	1.14114	0.209004	5.45988	4.76455e-08	1.09435e-06
LRRTM1	602.101	-1.34363	0.400441	-3.35538	0.000792551	0.00667895
LSAMP	60.7069	-1.15408	0.348654	-3.31009	0.000932649	0.00765425
LSM12	110.235	-0.753665	0.259777	-2.9012	0.00371733	0.0245406
LSM12P1	13.2974	4.62639	0.946745	4.88663	1.02576e-06	1.79324e-05
LSM14A	961.84	1.4897	0.11723	12.7075	5.37378e-37	1.33814e-34
LSS	1112.33	1.15938	0.124588	9.30577	1.33021e-20	1.17075e-18
LTBP3	343.973	0.836596	0.16897	4.95114	7.37796e-07	1.33201e-05
LTBP4	1920.11	-0.580107	0.1489	-3.89594	9.78199e-05	0.00108318
LUM	273.987	2.7627	0.784452	3.52183	0.000428584	0.00392434
LY6E	986.165	1.61941	0.146802	11.0312	2.70155e-28	4.08614e-26
LY6G5B	18.2073	5.97559	1.1757	5.08258	3.7234e-07	7.08556e-06
LY6G5C	5.73314	5.47142	1.73697	3.14999	0.00163278	0.0123893
LYN	256.658	-0.803298	0.255094	-3.14903	0.00163812	0.012416
LYNX1	81.581	-1.97288	0.311787	-6.32766	2.48904e-10	8.00375e-09
LYPD6B	85.1263	1.48166	0.37866	3.91291	9.11886e-05	0.00102082
LZTR1	221.387	-1.5043	0.213214	-7.05536	1.72158e-12	7.2331e-11
LZTS1	123.63	-2.44673	0.260385	-9.39657	5.63717e-21	5.16168e-19
MAFA	21.0551	-2.52019	0.645415	-3.90476	9.43177e-05	0.00105083
MAFA.AS1	3.79534	-4.9069	1.8668	-2.62851	0.0085759	0.0490645
MAFB	56.334	-1.61459	0.452607	-3.5673	0.00036068	0.00337367
MAGEA12	61.3852	-6.31035	0.671706	-9.39451	5.74826e-21	5.2399e-19
MAGEA2	3.8911	-6.1577	1.88644	-3.2642	0.00109774	0.00881325
MAGEB17	49.5878	-1.90032	0.494298	-3.84448	0.000120807	0.00129797
MAGEB3	18.8967	-2.39475	0.69876	-3.42714	0.000609966	0.00534316
MAGED4	9.60858	-3.41913	0.968902	-3.52887	0.000417334	0.00383508
MAGED4B	9.35698	-4.4231	1.1601	-3.8127	0.000137455	0.00145576
MAGEH1	232.912	1.50273	0.205765	7.30316	2.81094e-13	1.27265e-11
MAGEL2	170.794	0.86258	0.238002	3.62426	0.000289793	0.00278592
MAGI1	575.318	0.622742	0.158527	3.92829	8.55513e-05	0.000968333
MAL2	328.815	1.68172	0.46204	3.63978	0.000272868	0.00265319
MALT1	729.762	-1.66509	0.16085	-10.3518	4.10501e-25	4.9306e-23
MAMDC2	56.4812	1.72346	0.443538	3.88571	0.000102033	0.00112313
MAN1A1	413.599	-0.982838	0.172147	-5.7093	1.13445e-08	2.8598e-07
MANEA	243.107	0.888484	0.27145	3.27311	0.00106373	0.00856141
MANSC1	37.7247	1.26621	0.438384	2.88836	0.0038726	0.0254341
MAOA	272.39	-1.85556	0.225351	-8.23406	1.80975e-16	1.10639e-14
MAP1A	293.741	0.612124	0.182053	3.36234	0.000772858	0.00653999
MAP1B	5899.57	-1.9283	0.443966	-4.34336	1.4032e-05	0.000192553
MAP2K6	466.834	1.31837	0.188782	6.98353	2.87863e-12	1.18505e-10
MAP3K1	634.121	0.596366	0.135017	4.41699	1.00086e-05	0.000142415
MAP3K10	154.689	0.623952	0.221654	2.81498	0.004878	0.0308275
MAP6	42.8456	1.7663	0.424458	4.16131	3.16433e-05	0.00039835
MAP7	186.028	0.98278	0.261548	3.75755	0.000171586	0.00177309
MAPK12	286.701	-1.07145	0.179708	-5.96215	2.48947e-09	6.86e-08
MAPK8IP1P2	12.8781	8.09848	1.59823	5.06716	4.03803e-07	7.64157e-06
MARF1	398.728	1.52973	0.177556	8.6155	6.96396e-18	4.90158e-16
MARVELD2	168.691	3.72886	0.258571	14.421	3.81504e-47	1.41635e-44
MAT2A	1635.65	-0.611047	0.164366	-3.7176	0.000201121	0.0020411
MATR3	13.1555	-1.87819	0.705284	-2.66302	0.00774425	0.0451155
MB	13.0509	2.52295	0.757358	3.33125	0.000864578	0.00719976
MBD2	180.086	-1.09291	0.226772	-4.81942	1.43973e-06	2.44779e-05
MBOAT1	94.31	-0.947195	0.330166	-2.86885	0.00411968	0.0267557
MBOAT7	1125.3	1.64088	0.113086	14.51	1.04751e-47	3.96096e-45
MBP	102.162	1.13565	0.312543	3.63359	0.0002795	0.00270223
MCC	1840.83	1.12807	0.12725	8.865	7.6507e-19	5.76456e-17
MCM10	241.736	-0.663149	0.186293	-3.55971	0.000371259	0.00345678
MCRIP2P1	3.55538	-6.23566	2.03882	-3.05846	0.00222477	0.0160239
MCTS2P	4.18743	-6.47967	1.95079	-3.32157	0.000895139	0.00739994
MDC1	883.108	2.20582	0.132582	16.6374	3.73271e-62	2.17766e-59
MECOM	163.204	1.50296	0.344103	4.36777	1.2552e-05	0.000174573
MED12	1663.48	0.599098	0.102275	5.8577	4.69308e-09	1.23649e-07
MEDAG	3.7638	-6.21792	1.98339	-3.135	0.00171857	0.0129155
MEF2C	177.659	3.11269	0.274233	11.3505	7.37006e-30	1.25408e-27
MEF2C.AS1	13.3934	2.63586	0.904931	2.91278	0.00358229	0.0237799
MEGF10	25.6068	-1.69928	0.548802	-3.09635	0.00195918	0.0144109
MEIOC	22.1159	-1.58153	0.587381	-2.69251	0.00709159	0.042037
MEIS1	1134.24	-0.767113	0.146668	-5.23028	1.69257e-07	3.45261e-06
MELTF	206.736	-0.881628	0.191535	-4.60297	4.16511e-06	6.43811e-05
MESP1	30.822	-3.70238	0.604404	-6.12567	9.03005e-10	2.68001e-08
MESP2	50.897	-5.40319	0.657611	-8.21639	2.09722e-16	1.26983e-14
MEST	1744.56	-2.02269	0.313249	-6.45714	1.06704e-10	3.58352e-09
METRN	341.56	-1.05893	0.19878	-5.32716	9.97594e-08	2.14872e-06
METRNL	92.8055	1.13242	0.28554	3.96589	7.3124e-05	0.000844886
METTL7A	51.5454	1.35591	0.492822	2.75133	0.00593546	0.036304
MFAP3L	116.621	1.0264	0.269285	3.81157	0.000138087	0.00146169
MFAP4	521.713	-0.825506	0.18278	-4.51638	6.29058e-06	9.41696e-05
MFSD14C	620.05	2.24481	0.147729	15.1955	3.78864e-52	1.68175e-49
MFSD2B	11.3115	-2.73612	0.85267	-3.20888	0.00133252	0.0103969
MFSD4B	186.205	0.713473	0.232867	3.06387	0.00218497	0.0157873
MGAM	9.04922	-3.45708	1.04211	-3.31737	0.000908678	0.00748761
MGAT4A	77.8523	1.26992	0.337521	3.76248	0.000168236	0.00174465
MGAT5	1064.36	0.658374	0.173887	3.78622	0.000152955	0.00160246
MIB2	552.634	-0.822123	0.189486	-4.3387	1.43331e-05	0.000196158
MICA	37.8765	1.63455	0.449831	3.63369	0.000279393	0.00270223
MICALL2	87.9485	-1.1675	0.286988	-4.06811	4.7396e-05	0.000571636
MICB	18.6305	2.40591	0.642444	3.74493	0.000180444	0.0018515
MID1IP1	919.663	-0.723126	0.138535	-5.21982	1.79098e-07	3.63519e-06
MIF	5.17654	4.91023	1.7452	2.81357	0.00489952	0.0309348
MIF.AS1	8.62226	4.1898	1.08211	3.87189	0.000107993	0.00117921
MIF4GD	148.85	0.859352	0.216723	3.96521	7.33301e-05	0.000846425
MIGA2	217.982	-0.677831	0.206538	-3.28188	0.00103118	0.0083521
MIIP	269.266	-0.586639	0.181176	-3.23795	0.00120392	0.00955787
MIR130B	4.23216	-6.41206	1.90854	-3.35966	0.00078037	0.00658446
MIR210HG	35.2282	1.78672	0.506586	3.52699	0.000420315	0.00385726
MIR22HG	19.6841	5.63185	1.00145	5.6237	1.86909e-08	4.56519e-07
MIR4500HG	5.06363	-6.00439	1.76894	-3.39435	0.000687918	0.00593544
MIR4664	16.6381	6.93826	1.51639	4.57552	4.7504e-06	7.28763e-05
MIR621	32.471	1.7124	0.437662	3.9126	9.13065e-05	0.00102158
MIXL1	51.4513	-4.53168	0.532676	-8.50739	1.77896e-17	1.21082e-15
MLLT6	423.179	2.09752	0.210475	9.96566	2.15437e-23	2.37785e-21
MMADHC	486.022	-1.23451	0.153742	-8.02974	9.76777e-16	5.46433e-14
MME	508.229	-0.868947	0.201743	-4.3072	1.65335e-05	0.00022225
MMP11	1045.92	3.38042	0.182053	18.5683	5.7964e-77	4.38358e-74
MMP17	72.9549	-1.33369	0.313638	-4.25232	2.11566e-05	0.00027692
MMP2	2436.53	-1.13154	0.135678	-8.33988	7.43683e-17	4.73061e-15
MMP25	49.0336	-1.01608	0.378472	-2.6847	0.00725959	0.0428171
MMRN1	4.44375	5.40602	1.48593	3.63813	0.000274625	0.00266773
MMRN2	89.1867	3.08864	0.290128	10.6458	1.825e-26	2.35852e-24
MN1	539.356	-2.29439	0.245697	-9.33827	9.79212e-21	8.73124e-19
MOAP1	165.662	5.13674	0.34906	14.7159	5.09386e-49	2.08023e-46
MOK	395.024	-0.98112	0.18484	-5.30795	1.10868e-07	2.36059e-06
MORC4	57.1396	-1.03757	0.391	-2.65363	0.00796302	0.0461661
MORF4L1P1	54.2098	5.01817	0.572117	8.77122	1.76744e-18	1.29352e-16
MPC2	133.956	1.11861	0.256485	4.36131	1.29288e-05	0.000178973
MPHOSPH9	450.57	-0.682842	0.187733	-3.63731	0.000275499	0.00267359
MPIG6B	3.64883	6.77601	1.90619	3.55474	0.000378352	0.00351642
MPP2	262.85	-0.74017	0.196126	-3.77395	0.000160685	0.001674
MPP7	105.125	0.954036	0.263794	3.6166	0.000298499	0.00286153
MPV17L	7.29218	4.23926	1.08646	3.90189	9.5445e-05	0.00106091
MRC1	15.3984	4.43906	0.764273	5.80821	6.31437e-09	1.64037e-07
MRM1	35.6783	2.04551	0.426245	4.79891	1.59532e-06	2.69436e-05
MROH6	37.9084	2.1789	0.45866	4.75058	2.02832e-06	3.3617e-05
MRPL45	421.005	1.0479	0.151652	6.90987	4.8511e-12	1.94606e-10
MRPS18B	200.229	1.37248	0.196828	6.97301	3.10226e-12	1.27199e-10
MRS2	443.995	0.652366	0.199507	3.2699	0.00107587	0.00864546
MSANTD2	132.816	1.06405	0.239718	4.43875	9.04841e-06	0.000130204
MSH5	29.552	3.12459	0.548161	5.70014	1.19711e-08	2.99188e-07
MSRB2	160.532	0.588352	0.220519	2.66803	0.00762982	0.044576
MT.RNR1	5445	-1.32688	0.127925	-10.3723	3.31388e-25	4.07627e-23
MT.RNR2	37759.8	-0.596794	0.110787	-5.38684	7.17066e-08	1.58597e-06
MTCL1	237.701	-1.08973	0.250283	-4.35399	1.3368e-05	0.000184184
MTHFD1L	258.842	-0.667612	0.183402	-3.64016	0.000272465	0.00265053
MTHFD2	646.198	-0.718957	0.241508	-2.97694	0.00291139	0.0200904
MTMR10	210.792	1.62171	0.209218	7.75128	9.09739e-15	4.67908e-13
MTND2P28	670.278	-0.672615	0.127883	-5.25959	1.44377e-07	2.9899e-06
MTRNR2L1	111.08	-2.00363	0.298673	-6.70842	1.96741e-11	7.29083e-10
MTRNR2L8	5.46535	-6.38691	1.74503	-3.66007	0.000252146	0.00248792
MTSS1	178.025	2.22744	0.330674	6.73607	1.6273e-11	6.10806e-10
MTTP	73.5184	5.3679	0.421123	12.7466	3.25496e-37	8.41304e-35
MTURN	204.638	1.03355	0.193552	5.33991	9.29942e-08	2.0179e-06
MTX1P1	20.5894	2.58544	0.613218	4.21619	2.48461e-05	0.000319479
MUC16	57.5324	1.0848	0.377375	2.87458	0.00404561	0.0263416
MUC6	10.3176	7.52364	1.63222	4.60946	4.03714e-06	6.25925e-05
MVB12B	350.985	0.885981	0.165806	5.34347	9.11837e-08	1.98283e-06
MXI1	425.527	1.59413	0.164081	9.71548	2.59035e-22	2.63146e-20
MXRA5	149.422	1.73167	0.340422	5.08682	3.64115e-07	6.94199e-06
MXRA8	766.63	-0.653072	0.133939	-4.87591	1.08309e-06	1.887e-05
MYC	69.6316	-1.05115	0.350614	-2.99802	0.00271743	0.0189506
MYCL	391.506	1.81224	0.15679	11.5584	6.696e-31	1.20996e-28
MYH6	775.237	4.18457	0.412589	10.1422	3.58808e-24	4.13926e-22
MYH7	41.2283	6.05729	1.2171	4.97682	6.4639e-07	1.1795e-05
MYH9	8054.83	0.623143	0.0939343	6.63383	3.27096e-11	1.17588e-09
MYO18A	692.693	1.17022	0.130114	8.99385	2.38711e-19	1.90175e-17
MYO1C	865.504	0.639426	0.123768	5.16631	2.38764e-07	4.69684e-06
MYO3B	78.568	1.33311	0.429152	3.10638	0.00189395	0.0140169
MYO5B	299.042	1.35422	0.230557	5.87368	4.26228e-09	1.13175e-07
MYO9A	605.804	0.7853	0.127916	6.13919	8.2945e-10	2.4761e-08
MYOM3	6.05253	2.92816	1.04701	2.79668	0.00516306	0.0323388
MYOZ2	2.88372	5.78445	2.01165	2.87548	0.00403414	0.0262921
MZT2A	145.337	-0.669635	0.223783	-2.99234	0.00276848	0.0192429
N4BP2	531.84	-0.601059	0.170873	-3.51758	0.000435508	0.00398416
NAA30	441.984	0.757069	0.142472	5.31381	1.07357e-07	2.29782e-06
NAB1	387.369	1.11782	0.182503	6.12497	9.0702e-10	2.68802e-08
NACA	1321.33	-0.649618	0.129273	-5.02517	5.0298e-07	9.35368e-06
NANP	110.028	-0.893075	0.272931	-3.27216	0.00106727	0.00858654
NAP1L2	38.3853	-1.53044	0.494044	-3.09778	0.00194974	0.0143569
NAP1L3	110.257	-1.77177	0.341786	-5.18385	2.17348e-07	4.32557e-06
NAP1L4	887.276	1.08381	0.118008	9.18428	4.14303e-20	3.51023e-18
NAPEPLD	91.7849	4.19819	0.362299	11.5876	4.76053e-31	8.75723e-29
NAT9	303.291	-0.588629	0.174546	-3.37235	0.000745299	0.00634358
NATD1	400.525	0.795615	0.149678	5.31552	1.06351e-07	2.27869e-06
NAV1	1970.35	-0.850773	0.310645	-2.73873	0.00616764	0.0373922
NAV2	1479.26	0.799092	0.124117	6.43819	1.20906e-10	4.04717e-09
NBEA	475.986	-0.615787	0.198012	-3.10985	0.00187181	0.0138984
NBEAL2	570.259	0.823594	0.241491	3.41045	0.00064855	0.00564241
NBPF14	119.175	-0.895141	0.278519	-3.21394	0.00130929	0.0102518
NBPF19	113.855	-1.11292	0.25739	-4.32386	1.53319e-05	0.000207464
NBPF26	96.7486	-1.08212	0.270199	-4.00491	6.20416e-05	0.000725976
NCALD	77.9993	1.70711	0.41826	4.08145	4.47557e-05	0.000542032
NCAM1	1362.3	-1.30571	0.193968	-6.73158	1.6783e-11	6.28792e-10
NCAN	153.509	-3.95808	0.308986	-12.8099	1.44314e-37	3.82695e-35
NCOA3	567.07	0.698378	0.15525	4.49841	6.8462e-06	0.000101299
NDE1	209.086	2.18593	0.225135	9.7094	2.74942e-22	2.76554e-20
NDN	788.337	-0.822212	0.147395	-5.57828	2.42905e-08	5.85583e-07
NDRG2	408.722	1.45357	0.188699	7.70314	1.32761e-14	6.77712e-13
NDRG4	205.747	-0.912641	0.221687	-4.11679	3.84183e-05	0.00047457
NDUFA3	99.7328	0.713312	0.264195	2.69994	0.00693513	0.0413093
NDUFA6	173.872	1.09506	0.218698	5.00718	5.52329e-07	1.02043e-05
NDUFA9P1	2.28377	6.21932	2.20077	2.82598	0.00471365	0.0299372
NEAT1	346.743	-1.41849	0.215162	-6.59268	4.31966e-11	1.53397e-09
NEBL	1793.26	-0.588629	0.141346	-4.16446	3.1209e-05	0.000393369
NEDD4L	706.559	1.74812	0.213089	8.20371	2.33081e-16	1.39979e-14
NEDD9	413.086	0.643577	0.226972	2.83549	0.00457548	0.0292324
NEFM	15.0359	-4.85152	1.21773	-3.98406	6.77468e-05	0.000788667
NEK2	491.628	0.750839	0.173192	4.3353	1.45563e-05	0.000198681
NEK3	173.114	0.715971	0.215157	3.32767	0.000875751	0.00727192
NELFE	538.976	0.640111	0.139677	4.5828	4.58785e-06	7.05417e-05
NELL2	234.288	-1.4096	0.204434	-6.89511	5.38238e-12	2.15074e-10
NETO1	305.994	-2.57841	0.307546	-8.38382	5.12388e-17	3.32142e-15
NEU1	392.026	2.35314	0.155796	15.104	1.52425e-51	6.62206e-49
NFASC	59.7963	-2.54662	0.450856	-5.64842	1.61927e-08	3.9836e-07
NFATC1	253.268	-1.23902	0.199777	-6.20201	5.57457e-10	1.69891e-08
NFATC2	33.858	1.81833	0.468401	3.88199	0.000103603	0.00113674
NFE2L2	249.142	0.666573	0.206181	3.23296	0.00122517	0.00969262
NFIC	83.514	-0.926673	0.331304	-2.79705	0.00515718	0.0323119
NFKBIL1	97.297	2.46404	0.275582	8.94123	3.84856e-19	2.94321e-17
NGEF	50.2101	-1.24559	0.420678	-2.96092	0.00306724	0.0209255
NID2	4106.63	0.993647	0.126088	7.88056	3.25928e-15	1.73142e-13
NIN	264.179	-0.948667	0.205296	-4.62098	3.81935e-06	5.97147e-05
NKAIN4	16.0751	-1.87714	0.686955	-2.73255	0.00628459	0.0379435
NKX2.1	3.31784	5.35139	1.9773	2.70642	0.00680127	0.0406543
NKX2.3	15.0187	2.93078	0.846424	3.46254	0.000535094	0.00476082
NKX2.8	8.51639	3.42235	1.03776	3.29783	0.000974339	0.00794847
NLGN4X	300.69	-1.05826	0.257792	-4.10511	4.04124e-05	0.000494712
NLRP2	266.56	1.80051	0.22134	8.13456	4.13431e-16	2.39825e-14
NLRP7	8.87864	4.93081	1.06476	4.63092	3.64038e-06	5.72673e-05
NME8	9.64129	-2.73618	0.891104	-3.07055	0.00213664	0.015515
NMNAT2	226.204	0.627036	0.237384	2.64144	0.00825536	0.0475773
NMRAL1	76.1187	0.92813	0.290549	3.1944	0.00140124	0.0108667
NMRK1	61.398	0.948307	0.333364	2.84466	0.00444586	0.0285831
NMRK2	40.082	-1.31751	0.463802	-2.84068	0.00450179	0.0288428
NMU	21.964	-1.69549	0.617369	-2.74632	0.00602677	0.0367235
NOC3L	162.594	-0.819295	0.224284	-3.65293	0.000259267	0.0025464
NOD1	432.907	-0.957608	0.162651	-5.88751	3.92051e-09	1.04781e-07
NOMO1	432.127	0.950685	0.156186	6.08688	1.1513e-09	3.3478e-08
NOP2	76.0101	-5.30202	0.483946	-10.9558	6.23205e-28	9.08944e-26
NOS2	61.6375	-1.4997	0.380507	-3.94132	8.10345e-05	0.000922835
NOS3	73.9198	1.94342	0.291238	6.67298	2.50663e-11	9.10981e-10
NOSTRIN	37.1665	2.24565	0.433947	5.17495	2.27976e-07	4.50633e-06
NOTCH1	1106.89	-0.944628	0.153276	-6.16293	7.14131e-10	2.15071e-08
NOTCH4	11.7743	4.24028	0.839197	5.05278	4.35434e-07	8.19458e-06
NOV	5.99873	-4.09079	1.37222	-2.98115	0.00287172	0.0198569
NOVA2	93.4958	1.27878	0.271638	4.70767	2.50563e-06	4.07994e-05
NPAP1	9.9928	-4.16352	1.16763	-3.56578	0.000362774	0.0033886
NPBWR1	14.7627	2.79177	0.714677	3.90634	9.37041e-05	0.00104497
NPC1L1	40.8743	3.12334	0.466106	6.70092	2.07118e-11	7.63381e-10
NPIPA1	39.0925	1.64055	0.422783	3.88036	0.0001043	0.00114378
NPIPB13	20.5242	2.12231	0.654112	3.24457	0.00117628	0.00938589
NPIPP1	15.3424	2.83008	0.779766	3.6294	0.000284084	0.00274006
NPM3	167.978	-1.16862	0.253193	-4.61553	3.921e-06	6.10235e-05
NPNT	51.5347	2.9343	0.526266	5.5757	2.46541e-08	5.93646e-07
NPR1	99.7699	-1.8492	0.289857	-6.37972	1.77415e-10	5.86187e-09
NR0B1	81.3632	-2.23565	0.384027	-5.8216	5.82882e-09	1.52198e-07
NR2F1	62.3918	-2.76796	0.804441	-3.44084	0.000579905	0.00509951
NR2F2	35.9018	2.55046	0.473592	5.38536	7.22995e-08	1.59598e-06
NRG1	214.388	-2.03698	0.305507	-6.66753	2.60147e-11	9.43505e-10
NRG2	167.189	-1.27436	0.258736	-4.92532	8.42217e-07	1.49932e-05
NRG3	29.5509	-4.24484	0.705013	-6.02094	1.73406e-09	4.88382e-08
NRM	486.453	2.29188	0.147261	15.5634	1.29014e-54	6.42523e-52
NRXN3	238.889	-0.903051	0.207002	-4.36251	1.28576e-05	0.000178234
NSF	367.9	1.4544	0.193277	7.52495	5.27418e-14	2.55804e-12
NSMCE3	361.015	8.7219	0.504824	17.2771	6.9957e-67	4.46392e-64
NT5DC3	137.268	-0.723281	0.240023	-3.01338	0.00258352	0.0181718
NTN1	78.9007	-4.70425	0.448547	-10.4878	9.83337e-26	1.23943e-23
NTNG1	25.0374	1.70057	0.524621	3.24152	0.00118894	0.00946099
NTRK2	483.107	1.98203	0.667927	2.96743	0.00300301	0.0206182
NTRK3	39.6767	-4.35156	0.591174	-7.36088	1.82707e-13	8.32745e-12
NTS	66.413	-4.60576	0.558006	-8.25396	1.53225e-16	9.42383e-15
NUP210	1448.68	1.15778	0.209396	5.52911	3.21857e-08	7.69555e-07
NUP35	106.429	-0.784734	0.262657	-2.98768	0.00281105	0.0194902
NUP62CL	75.1861	0.953183	0.311854	3.0565	0.00223936	0.0161175
NUS1P1	11.2812	2.24584	0.793211	2.83133	0.00463546	0.0295601
NUSAP1	265.648	-2.61527	0.232638	-11.2418	2.54205e-29	4.11953e-27
NWD2	17.4793	-2.16013	0.789101	-2.73745	0.00619168	0.0375046
NXPE3	198.168	-0.714738	0.221714	-3.22369	0.00126548	0.00996142
NXPH2	116.36	1.24936	0.310371	4.02539	5.6882e-05	0.000673319
OARD1	199.104	-0.612364	0.199813	-3.06468	0.00217905	0.0157501
OCLN	187.092	2.63276	0.27375	9.61738	6.75297e-22	6.59755e-20
ODC1	1804.6	1.30727	0.322476	4.05386	5.03801e-05	0.000601938
OIT3	5.95924	4.49624	1.21099	3.71287	0.000204921	0.00207245
OLFM1	147.104	-2.15892	0.342412	-6.30504	2.88111e-10	9.20647e-09
OLFML1	150.887	-0.775487	0.249688	-3.10582	0.00189749	0.0140329
OLFML2A	377.886	-0.760515	0.211295	-3.59931	0.000319061	0.00303019
OLFML3	292.858	-0.593342	0.210393	-2.82015	0.00480005	0.0304291
OMA1	82.4649	1.06441	0.292651	3.63715	0.000275674	0.00267359
ONECUT1	8.54857	2.56026	0.904244	2.83138	0.00463471	0.0295601
OPRL1	85.8771	3.57396	0.35356	10.1085	5.06547e-24	5.81078e-22
OR13A1	7.91032	6.14162	1.66605	3.68634	0.000227504	0.00227159
OR2H2	8.30065	5.77909	1.75959	3.28433	0.00102226	0.00829298
OR51B5	2.74676	6.77066	2.13388	3.17293	0.00150911	0.011567
OR52A1	5.12221	-5.00395	1.8067	-2.76966	0.00561141	0.0347315
OR7E12P	87.3852	-1.35349	0.302112	-4.48009	7.46104e-06	0.000109186
OR7E145P	10.5707	2.27262	0.855118	2.65767	0.00786833	0.0456949
ORC6	491.728	-0.84498	0.151413	-5.58062	2.39658e-08	5.78436e-07
OSBPL3	244.79	-2.4771	0.28889	-8.57456	9.94654e-18	6.86143e-16
OSBPL5	329.788	-0.738772	0.195111	-3.78642	0.00015283	0.00160197
OTOGL	125.633	0.882405	0.317376	2.78031	0.00543062	0.033725
OTUB2	52.681	2.50016	0.403556	6.19533	5.81642e-10	1.76472e-08
OVOL1	25.3946	1.73702	0.588996	2.94911	0.00318689	0.0216405
OVOL2	83.7124	1.87258	0.495282	3.78082	0.000156311	0.00163426
OXTR	42.1759	1.46941	0.376765	3.90006	9.61674e-05	0.0010672
P2RY6	39.5821	2.49059	0.493125	5.05062	4.40381e-07	8.26483e-06
PACSIN1	93.5806	0.705502	0.264258	2.66974	0.00759095	0.0444252
PALD1	668.644	0.875808	0.14514	6.03421	1.59744e-09	4.54293e-08
PALLD	1251.69	-0.964801	0.132863	-7.26164	3.82428e-13	1.68293e-11
PAM16	27.7605	3.38751	0.595993	5.68381	1.3173e-08	3.27225e-07
PANK4	221.819	0.780634	0.190053	4.10746	4.00031e-05	0.00049029
PAPPA	392.715	-3.88101	0.706974	-5.48961	4.02832e-08	9.42203e-07
PAPPA2	17.9656	-2.28842	0.696397	-3.28609	0.00101588	0.00825111
PARN	245.245	0.727822	0.184238	3.95045	7.80032e-05	0.000895808
PATJ	672.701	0.763215	0.172055	4.43588	9.16989e-06	0.000131581
PAX1	10.3442	3.29041	1.0439	3.15205	0.00162131	0.0123206
PAX7	8.15017	-3.69484	1.17374	-3.14793	0.00164433	0.0124585
PAX8	8.4243	-3.18061	1.03749	-3.06567	0.00217186	0.0157092
PAX8.AS1	40.7928	-6.7315	0.91925	-7.32282	2.42809e-13	1.10176e-11
PBX2	1519.09	1.18739	0.108599	10.9337	7.95254e-28	1.14354e-25
PBX3	1278.81	-1.27529	0.200568	-6.35836	2.03921e-10	6.66218e-09
PCAT7	176.726	1.94683	0.243906	7.98189	1.44112e-15	7.88909e-14
PCBD1	195.561	1.11855	0.275563	4.05914	4.92547e-05	0.000590218
PCDH1	434.557	0.839823	0.239761	3.50276	0.000460472	0.00416587
PCDH10	1459.64	-0.717074	0.185451	-3.86666	0.000110337	0.00119902
PCDH11X	18.1748	-4.06261	0.820021	-4.95428	7.26e-07	1.31304e-05
PCDH11Y	11.4949	-3.28917	0.911256	-3.6095	0.000306794	0.0029273
PCDH17	423.754	2.57733	0.149279	17.2652	8.60198e-67	5.32254e-64
PCDH18	321.452	0.587544	0.170351	3.44903	0.000562614	0.00496351
PCDH19	110.458	-5.66343	0.828427	-6.83637	8.1226e-12	3.1773e-10
PCDH8	104.801	-1.03331	0.365436	-2.82761	0.00468962	0.0298217
PCDHA1	18.9749	-2.09393	0.6885	-3.04129	0.00235568	0.0168125
PCDHA6	116.846	-1.07429	0.273046	-3.93446	8.33842e-05	0.000947188
PCDHB15	92.4811	-0.784104	0.282658	-2.77404	0.00553652	0.03432
PCDHB18P	13.7649	-3.31158	0.85717	-3.86338	0.000111827	0.00121199
PCDHB3	69.5394	-1.50937	0.336203	-4.48945	7.14075e-06	0.000105048
PCDHGA11	151.763	-1.0819	0.253211	-4.27272	1.931e-05	0.000254875
PCDHGA2	4.98022	-4.76889	1.77115	-2.69254	0.00709091	0.042037
PCDHGA3	10.1792	-3.03015	0.930494	-3.2565	0.00112794	0.00902837
PCDHGA4	16.081	-2.10618	0.685843	-3.07094	0.00213389	0.0155005
PCDHGA6	17.4627	-2.45415	0.718968	-3.41344	0.00064149	0.00558575
PCDHGB2	18.156	-1.89624	0.673773	-2.81437	0.00488732	0.0308769
PCDHGB3	14.4335	-1.9988	0.709195	-2.8184	0.00482629	0.0305575
PCDHGB5	46.1705	-2.34299	0.413824	-5.66181	1.49788e-08	3.70053e-07
PCDHGB7	280.301	-0.587948	0.200611	-2.93079	0.00338101	0.0226722
PCDHGC3	288.139	-0.830119	0.216185	-3.83985	0.000123107	0.00132023
PCED1B	33.8147	-1.5665	0.5391	-2.90577	0.00366355	0.0242562
PCGF2	488.865	0.669558	0.149128	4.48982	7.12822e-06	0.00010494
PCGF5	82.5894	1.57482	0.358497	4.39283	1.11883e-05	0.000157446
PCMTD2	521.578	1.71188	0.141862	12.0672	1.57307e-33	3.14908e-31
PCNA	702.961	-0.639635	0.141013	-4.53601	5.73275e-06	8.61981e-05
PCSK6	65.2771	1.16736	0.333381	3.50157	0.000462531	0.00418079
PCSK9	306.785	-0.722142	0.18921	-3.81662	0.000135292	0.00143658
PCTP	194.515	0.829246	0.234703	3.53318	0.000410597	0.00377657
PCYT2	347.879	0.895331	0.256938	3.48462	0.000492842	0.00442395
PDE1C	47.8533	-2.44158	0.456595	-5.34736	8.92443e-08	1.94273e-06
PDE3A	949.348	2.09986	0.475997	4.4115	1.02659e-05	0.000145772
PDE4C	15.0052	-6.71687	1.58873	-4.22782	2.35963e-05	0.000305525
PDE4D	154.023	-0.704266	0.231143	-3.04688	0.0023123	0.0165608
PDGFRA	3730.8	-0.736293	0.173125	-4.25296	2.10959e-05	0.000276303
PDGFRB	1092.2	-1.19321	0.220323	-5.41572	6.10424e-08	1.37271e-06
PDIA3P1	41.9981	1.7761	0.396999	4.47382	7.68359e-06	0.000111905
PDK3	181.887	0.919292	0.202281	4.54463	5.50314e-06	8.30514e-05
PDP1	107.143	-0.808776	0.252259	-3.20614	0.00134529	0.010487
PDXDC1	1530.28	1.6033	0.180873	8.86423	7.70359e-19	5.78307e-17
PDZD2	166.303	-0.643811	0.226385	-2.84388	0.00445679	0.0286354
PDZD3	6.98432	3.50111	1.00189	3.49449	0.000474964	0.00428181
PDZD4	417.92	-1.4448	0.178643	-8.08762	6.08402e-16	3.46043e-14
PDZRN3	463.903	1.27687	0.151321	8.43813	3.22447e-17	2.15165e-15
PECAM1	26.5975	3.87142	0.535796	7.22554	4.99133e-13	2.17773e-11
PEG10	9274.92	2.14845	0.407754	5.26899	1.3718e-07	2.86117e-06
PELI1	700.265	0.726349	0.194353	3.73727	0.000186029	0.00190307
PER3	103.483	-1.55934	0.30254	-5.15417	2.54755e-07	4.99218e-06
PEX6	382.132	0.690147	0.161336	4.27771	1.88826e-05	0.000250529
PFDN6	63.5895	1.28667	0.338115	3.80541	0.000141567	0.0014962
PFN2	1444.96	-0.883351	0.119326	-7.40284	1.33299e-13	6.15799e-12
PGAM1	1397.57	-0.748774	0.117891	-6.35143	2.13321e-10	6.94704e-09
PGF	299.547	-1.02547	0.261235	-3.92547	8.65599e-05	0.000978664
PGK1	2300.59	-0.594704	0.112774	-5.27343	1.33899e-07	2.80659e-06
PGPEP1	117.488	0.826297	0.247416	3.33971	0.000838649	0.00701244
PHACTR2	840.631	0.782327	0.171338	4.56598	4.97177e-06	7.58167e-05
PHC1	472.694	-1.43428	0.174403	-8.22395	1.96913e-16	1.20023e-14
PHC1P1	106.697	-0.975937	0.26258	-3.71673	0.000201821	0.00204617
PHC2	586.929	0.900558	0.137524	6.54838	5.81626e-11	2.02666e-09
PHF24	34.1871	1.3072	0.433761	3.01365	0.00258128	0.0181718
PHKA1	232.791	0.596254	0.216719	2.75127	0.00593638	0.036304
PHLDA1	208.061	-0.692642	0.210951	-3.28342	0.00102555	0.00831309
PHLDB2	472.2	0.954017	0.196345	4.85889	1.18046e-06	2.04964e-05
PHRF1	621.685	1.75494	0.139237	12.604	2.00806e-36	4.65939e-34
PIGV	182.859	0.702188	0.20648	3.40075	0.000672006	0.00582415
PIGW	39.9037	4.03358	0.515888	7.81871	5.33653e-15	2.80842e-13
PIK3CD	234.527	0.8938	0.193006	4.63094	3.64015e-06	5.72673e-05
PIK3R1	480.688	0.709757	0.153963	4.60991	4.02844e-06	6.25052e-05
PIM2	88.5376	-1.32773	0.290315	-4.57342	4.79824e-06	7.34448e-05
PINX1	9.73446	-7.71927	1.66327	-4.64101	3.4671e-06	5.48796e-05
PIP4K2B	1386.63	2.71862	0.128088	21.2246	5.65691e-100	8.25061e-97
PITPNM1	894.314	-0.633035	0.136281	-4.64508	3.39942e-06	5.40177e-05
PITX1	95.5239	1.95316	0.328143	5.95215	2.64647e-09	7.24374e-08
PITX2	74.6426	1.72706	0.446018	3.87218	0.000107867	0.00117846
PKD1	1049.31	-0.924123	0.134826	-6.8542	7.17129e-12	2.8214e-10
PKD1P6	113.417	1.52445	0.257839	5.91242	3.37119e-09	9.0933e-08
PKD1P6.NPIPP1	13.7905	2.55444	0.810663	3.15105	0.00162687	0.0123583
PKDCC	2428.83	-0.713589	0.152801	-4.67004	3.01144e-06	4.81901e-05
PKIA	124.482	0.804486	0.250567	3.21065	0.00132433	0.0103488
PKNOX2	199.365	-0.740802	0.22376	-3.3107	0.00093063	0.00764382
PLA2G12A	173.733	-0.800326	0.227752	-3.51403	0.00044137	0.00402336
PLA2G12B	3.35475	6.52148	1.9701	3.31023	0.000932182	0.00765349
PLA2G16	97.8605	1.28208	0.382401	3.35271	0.000800239	0.00673263
PLAT	77.6177	3.02988	0.322778	9.3869	6.17913e-21	5.60763e-19
PLAUR	66.4964	-0.88287	0.319516	-2.76315	0.00572464	0.0352401
PLBD2	344.779	-0.951005	0.183068	-5.19483	2.04912e-07	4.09403e-06
PLCB1	380.62	-1.3342	0.187428	-7.11845	1.0915e-12	4.62391e-11
PLCD1	537.356	0.918675	0.167687	5.47852	4.2889e-08	9.97438e-07
PLCE1	750.707	-1.03553	0.199919	-5.17975	2.22186e-07	4.40468e-06
PLCG2	271.334	1.7169	0.215465	7.96838	1.6077e-15	8.73076e-14
PLCL1	4.41468	3.69345	1.27003	2.90816	0.00363561	0.0240947
PLD1	134.132	0.951508	0.292687	3.25094	0.00115024	0.00918884
PLD3	2770.86	0.594586	0.111781	5.31923	1.04206e-07	2.23742e-06
PLEKHA1	528.648	-0.69183	0.147191	-4.70023	2.59863e-06	4.22127e-05
PLEKHA7	250.749	0.645572	0.207729	3.10776	0.00188508	0.0139664
PLEKHG1	68.1439	1.54698	0.346943	4.45889	8.2386e-06	0.000119054
PLEKHG4B	711.383	0.645783	0.162261	3.97989	6.89457e-05	0.000801321
PLEKHH1	550.919	0.813766	0.20045	4.0597	4.91365e-05	0.000589148
PLEKHM1	178.901	2.54003	0.22861	11.1108	1.11209e-28	1.73342e-26
PLG	7.16565	7.02044	1.64093	4.27833	1.88297e-05	0.000249989
PLLP	142.902	0.79252	0.221319	3.5809	0.00034241	0.00322494
PLPP3	428.971	1.45116	0.268006	5.41466	6.14047e-08	1.37934e-06
PLPP6	155.995	1.36345	0.226181	6.02813	1.65863e-09	4.69729e-08
PLSCR1	185.135	-0.615252	0.232659	-2.64444	0.00818267	0.0472651
PLSCR4	71.1351	-1.08722	0.338483	-3.21204	0.00131797	0.010307
PLVAP	44.4928	6.57923	0.646705	10.1735	2.60482e-24	3.05677e-22
PLXDC2	506.866	-1.70044	0.186224	-9.13117	6.7765e-20	5.602e-18
PLXNA2	1760.29	-3.3221	0.420258	-7.90491	2.68124e-15	1.4332e-13
PLXNA4	327.537	-0.95283	0.186848	-5.0995	3.40547e-07	6.5231e-06
PMAIP1	166.372	-1.96895	0.253769	-7.75884	8.57069e-15	4.41932e-13
PMFBP1	29.7047	-1.71999	0.508089	-3.38521	0.000711226	0.00609421
PMM1	158.671	1.252	0.20664	6.05883	1.37117e-09	3.92679e-08
PNP	188.633	-0.735597	0.206717	-3.55847	0.000373017	0.00347157
PODXL	5762.41	0.882815	0.137246	6.43234	1.25653e-10	4.19919e-09
POLA2	133.418	-2.30372	0.243794	-9.44947	3.40547e-21	3.17517e-19
POLR1B	345.025	-0.695208	0.160954	-4.31928	1.56536e-05	0.000211536
POLR2F	87.8609	3.65017	0.343436	10.6284	2.19888e-26	2.82384e-24
POLR3G	35.6397	-1.20664	0.45719	-2.63926	0.0083088	0.0478515
POPDC2	98.3197	1.27897	0.369873	3.45787	0.000544472	0.00482324
POTEC	17.6749	-7.08292	1.5631	-4.53132	5.86149e-06	8.79396e-05
POU5F1	378.397	-1.09086	0.162329	-6.72008	1.81628e-11	6.76763e-10
PP7080	12.6065	-6.54275	1.58966	-4.11581	3.85827e-05	0.000476041
PPAT	543.234	-0.681981	0.178261	-3.82574	0.000130379	0.00139237
PPFIA2	27.7991	-4.85841	0.894949	-5.4287	5.67653e-08	1.2836e-06
PPFIBP2	838.861	1.61166	0.517814	3.11244	0.00185549	0.0138023
PPIA	2166.18	-0.791885	0.112279	-7.05281	1.75342e-12	7.35175e-11
PPIAP22	30.9483	2.16068	0.53192	4.06203	4.86481e-05	0.000584038
PPIAP46	80.3436	-3.9694	0.426131	-9.31496	1.21994e-20	1.08077e-18
PPL	591.09	0.798138	0.188058	4.24411	2.19466e-05	0.000286343
PPM1B	212.897	-1.33669	0.21051	-6.34978	2.15619e-10	6.99955e-09
PPM1H	632.321	0.896393	0.222092	4.03613	5.43391e-05	0.000645462
PPM1L	415.574	-0.776641	0.20415	-3.80428	0.000142219	0.00150154
PPP1R10	694.122	1.42683	0.126264	11.3003	1.30712e-29	2.18772e-27
PPP1R11	186.926	3.23177	0.229884	14.0583	6.85387e-45	2.41292e-42
PPP1R13B	249.45	0.652957	0.205268	3.181	0.00146768	0.0112833
PPP1R16B	100.012	1.86772	0.311163	6.00237	1.94461e-09	5.43931e-08
PPP1R17	3.67442	-6.07396	2.01306	-3.01727	0.00255061	0.0179962
PPP1R18	249.279	4.47337	0.235916	18.9617	3.53697e-80	2.88886e-77
PPP1R1B	33.8841	-2.77205	0.496068	-5.58805	2.29632e-08	5.54895e-07
PPP1R2	240.154	-0.583487	0.213494	-2.73303	0.00627541	0.0379118
PPP1R21	247.707	0.760631	0.207883	3.65894	0.000253264	0.00249585
PPP1R3F	72.8103	1.15805	0.330549	3.50341	0.000459341	0.00415749
PPP1R9A	165.569	1.4823	0.236864	6.25804	3.89857e-10	1.21349e-08
PPP2R3B	335.622	1.07297	0.165372	6.48819	8.68757e-11	2.9467e-09
PPP2R5D	543.841	-0.760106	0.150174	-5.06151	4.15947e-07	7.86409e-06
PPP3CA	370.791	-0.649383	0.182704	-3.55429	0.000379008	0.00351931
PPT2	93.3586	2.85727	0.302742	9.43798	3.80041e-21	3.51134e-19
PRAG1	543	-0.608652	0.198478	-3.0666	0.00216508	0.0156768
[truncated: 880 more rows]
