# Supplementary material for: GATA6 mutations in hiPSCs inform mechanisms for maldevelopment of the heart, pancreas, and diaphragm
Source: eLife. 2020 Oct 15;9:e53278. doi: 10.7554/eLife.53278 (PMC7593088; doi:10.7554/eLife.53278)
Supplement: Supplementary file 6. [file elife-53278-supp6.xlsx]

## Sheet: Table
Supplemental Table 5: Diminished ATAC peaks (≥ 2-fold) in day 4 GATA6 LOF and missense cells
chrom	start	end	Down In GATA6 +/-	Down In GATA6-/-	Down In GATA6456/456	annotation	geneChr	geneStart	geneEnd	geneLength	geneStrand	geneId	transcriptId	distanceToTSS	ENSEMBL	SYMBOL	GENENAME
chr1	567505	567654		X		Distal Intergenic	1	621096	622034	939	2	729759	uc010nxv.2	54380	ENSG00000284733	OR4F29	olfactory receptor family 4 subfamily F member 29
chr1	569853	570002		X		Distal Intergenic	1	621096	622034	939	2	729759	uc010nxv.2	52032	ENSG00000284733	OR4F29	olfactory receptor family 4 subfamily F member 29
chr1	781145	781294		X		"Intron (uc001abp.2/643837, intron 2 of 5)"	1	763178	794826	31649	1	643837	uc031pjk.1	17967	ENSG00000228794	LINC01128	long intergenic non-protein coding RNA 1128
chr1	805226	805375	X			"Intron (uc001abt.4/284593, intron 2 of 2)"	1	803451	812182	8732	2	284593	uc001abt.4	6807	ENSG00000230368	FAM41C	family with sequence similarity 41 member C
chr1	859289	859419		X	X	Promoter (1-2kb)	1	860530	871276	10747	1	148398	uc001abv.1	-1111	ENSG00000187634	SAMD11	sterile alpha motif domain containing 11
chr1	877176	877325		X		Promoter (<=1kb)	1	876524	879961	3438	1	148398	uc031pkp.1	652	ENSG00000187634	SAMD11	sterile alpha motif domain containing 11
chr1	954944	955082		X	X	Promoter (<=1kb)	1	955503	991499	35997	1	375790	uc001ack.2	-421	ENSG00000188157	AGRN	agrin
chr1	968512	968661		X		"Intron (uc001ack.2/375790, intron 2 of 35)"	1	955503	991499	35997	1	375790	uc001ack.2	13009	ENSG00000188157	AGRN	agrin
chr1	1092920	1093069		X		Promoter (9-10kb)	1	1102484	1102578	95	1	406984	uc001acw.2	-9415	ENSG00000207730	MIR200B	microRNA 200b
chr1	1109206	1109355			X	Promoter (<=1kb)	1	1109286	1133313	24028	1	254173	uc001acy.2	0	ENSG00000162571	TTLL10	tubulin tyrosine ligase like 10
chr1	1141908	1142057			X	Promoter (<=1kb)	1	1138888	1142089	3202	2	8784	uc001adb.3	32	ENSG00000186891	TNFRSF18	TNF receptor superfamily member 18
chr1	1167352	1167501		X		Promoter (<=1kb)	1	1152288	1167447	15160	2	51150	uc001adh.4	0	ENSG00000078808	SDF4	stromal cell derived factor 4
chr1	1209220	1209369		X		Promoter (<=1kb)	1	1189292	1209234	19943	2	118424	uc001ado.3	0	ENSG00000160087	UBE2J2	ubiquitin conjugating enzyme E2 J2
chr1	1243754	1243903		X		Promoter (<=1kb)	1	1243994	1247057	3064	1	126789	uc001aed.3	-91	ENSG00000169972	PUSL1	pseudouridylate synthase-like 1
chr1	1334762	1334911		X		Promoter (<=1kb)	1	1334910	1337426	2517	1	148413	uc001afm.3	0	ENSG00000224870	LOC148413	uncharacterized LOC148413
chr1	1370971	1371120			X	Promoter (<=1kb)	1	1370903	1378262	7360	1	64856	uc001afs.3	68	ENSG00000179403	VWA1	von Willebrand factor A domain containing 1
chr1	1407026	1407175		X		Promoter (<=1kb)	1	1407164	1431582	24419	1	83858	uc001afv.3	0	ENSG00000160072	ATAD3B	"ATPase family, AAA domain containing 3B"
chr1	1509907	1510056			X	Promoter (<=1kb)	1	1477053	1510262	33210	2	29101	uc001agd.3	206	ENSG00000160075	SSU72	"SSU72 homolog, RNA polymerase II CTD phosphatase"
chr1	1510215	1510364			X	Promoter (<=1kb)	1	1477053	1510262	33210	2	29101	uc001agd.3	0	ENSG00000160075	SSU72	"SSU72 homolog, RNA polymerase II CTD phosphatase"
chr1	1565718	1565867			X	Promoter (1-2kb)	1	1564486	1565990	1505	1	142678	uc001ago.3	1232	ENSG00000197530	MIB2	mindbomb E3 ubiquitin protein ligase 2
chr1	1590636	1590762		X	X	"Intron (uc001ags.1/984, intron 2 of 15)"	1	1577747	1580625	2879	2	984	uc010nyr.1	-10011	ENSG00000248333	CDK11B	cyclin dependent kinase 11B
chr1	1655827	1655976		X		Promoter (<=1kb)	1	1640233	1655791	15559	2	728642	uc009vkv.1	-36	ENSG00000008128	CDK11A	cyclin dependent kinase 11A
chr1	1677836	1677985		X		Promoter (<=1kb)	1	1658824	1677438	18615	2	9906	uc001aia.2	-398	ENSG00000215790	SLC35E2A	solute carrier family 35 member E2A
chr1	1709398	1709547			X	Promoter (<=1kb)	1	1682671	1709909	27239	2	65220	uc001aic.3	362	ENSG00000008130	NADK	NAD kinase
chr1	1709808	1709957			X	Promoter (<=1kb)	1	1682671	1709909	27239	2	65220	uc001aic.3	0	ENSG00000008130	NADK	NAD kinase
chr1	1814980	1815128		X	X	"Intron (uc001aif.3/2782, intron 1 of 11)"	1	1716725	1822526	105802	2	2782	uc001aif.3	7398	ENSG00000078369	GNB1	G protein subunit beta 1
chr1	1822752	1822901		X		Promoter (<=1kb)	1	1716725	1822526	105802	2	2782	uc009vky.3	-226	ENSG00000078369	GNB1	G protein subunit beta 1
chr1	1951097	1951246			X	Promoter (<=1kb)	1	1950768	1962192	11425	1	2563	uc001aip.2	329	ENSG00000187730	GABRD	gamma-aminobutyric acid type A receptor delta subunit
chr1	2064696	2064845		X		"Intron (uc001aiq.3/5590, intron 4 of 17)"	1	2076796	2088167	11372	1	5590	uc009vlb.3	-11951	ENSG00000067606	PRKCZ	protein kinase C zeta
chr1	2130839	2130988		X		Promoter (4-5kb)	1	2123334	2126214	2881	2	199990	uc031pkv.1	-4625	ENSG00000162585	FAAP20	Fanconi anemia core complex associated protein 20
chr1	2158609	2158758		X		Promoter (1-2kb)	1	2160134	2241652	81519	1	6497	uc001aja.4	-1376	ENSG00000157933	SKI	SKI proto-oncogene
chr1	2159219	2159368		X		Promoter (<=1kb)	1	2160134	2241652	81519	1	6497	uc001aja.4	-766	ENSG00000157933	SKI	SKI proto-oncogene
chr1	2215950	2216099	X			"Intron (uc001aja.4/6497, intron 1 of 6)"	1	2160134	2241652	81519	1	6497	uc001aja.4	55816	ENSG00000157933	SKI	SKI proto-oncogene
chr1	2246646	2246795		X		Distal Intergenic	1	2281853	2284100	2248	2	100129534	uc001ajc.3	37305	ENSG00000269896	LOC100129534	small nuclear ribonucleoprotein polypeptide N pseudogene
chr1	2323045	2323194		X		Promoter (<=1kb)	1	2323214	2336885	13672	1	11079	uc001aje.2	-20	ENSG00000157916	RER1	retention in endoplasmic reticulum sorting receptor 1
chr1	2344047	2344196		X		Promoter (<=1kb)	1	2336241	2344010	7770	2	5192	uc001ajh.3	-37	ENSG00000157911	PEX10	peroxisomal biogenesis factor 10
chr1	2477494	2477643		X		Distal Intergenic	1	2481359	2484284	2926	2	115110	uc001ajo.2	6641	NA	TNFRSF14-AS1	TNFRSF14 antisense RNA 1
chr1	2542592	2542741			X	"Exon (uc009vlg.1/79258, exon 3 of 23)"	1	2522081	2560960	38880	2	79258	uc009vlg.1	18219	ENSG00000142606	MMEL1	membrane metalloendopeptidase like 1
chr1	2574694	2574843			X	"Intron (uc021oey.1/100287898, intron 6 of 6)"	1	2522081	2564481	42401	2	79258	uc001ajy.2	-10213	ENSG00000142606	MMEL1	membrane metalloendopeptidase like 1
chr1	2937877	2938026			X	Promoter (<=1kb)	1	2938046	2939467	1422	1	140625	uc001ajz.3	-20	ENSG00000169717	ACTRT2	actin related protein T2
chr1	3164382	3164531			X	"Intron (uc001akc.3/63976, intron 3 of 16)"	1	3044539	3044599	61	1	100422968	uc021oez.1	119843	ENSG00000283572	MIR4251	microRNA 4251
chr1	3247455	3247602		X	X	"Intron (uc001akc.3/63976, intron 3 of 16)"	1	3371147	3397677	26531	1	27237	uc001akg.4	-123545	ENSG00000130762	ARHGEF16	Rho guanine nucleotide exchange factor 16
chr1	3265842	3265989		X	X	"Intron (uc001akc.3/63976, intron 3 of 16)"	1	3371147	3397677	26531	1	27237	uc001akg.4	-105158	ENSG00000130762	ARHGEF16	Rho guanine nucleotide exchange factor 16
chr1	3310289	3310392		X	X	"Intron (uc001akc.3/63976, intron 4 of 16)"	1	3371147	3397677	26531	1	27237	uc001akg.4	-60755	ENSG00000130762	ARHGEF16	Rho guanine nucleotide exchange factor 16
chr1	3332048	3332126	X	X		"Intron (uc001akc.3/63976, intron 10 of 16)"	1	3371147	3397677	26531	1	27237	uc001akg.4	-39021	ENSG00000130762	ARHGEF16	Rho guanine nucleotide exchange factor 16
chr1	3332127	3332197	X	X	X	"Intron (uc001akc.3/63976, intron 10 of 16)"	1	3371147	3397677	26531	1	27237	uc001akg.4	-38950	ENSG00000130762	ARHGEF16	Rho guanine nucleotide exchange factor 16
chr1	3447944	3448093		X		Promoter (<=1kb)	1	3404506	3448012	43507	2	1953	uc001akk.3	0	ENSG00000162591	MEGF6	multiple EGF like domains 6
chr1	3482661	3482810		X		Promoter (5-6kb)	1	3477260	3477354	95	2	693135	uc021ofa.1	-5307	ENSG00000207776	MIR551A	microRNA 551a
chr1	3597688	3597837		X		Promoter (9-10kb)	1	3607236	3646315	39080	1	7161	uc010nzj.2	-9399	ENSG00000078900	TP73	tumor protein p73
chr1	3773828	3773977		X		Promoter (<=1kb)	1	3773845	3782564	8720	1	1677	uc009vln.1	0	ENSG00000169598	DFFB	DNA fragmentation factor subunit beta
chr1	4771015	4771164			X	"Intron (uc001alm.1/55966, intron 1 of 5)"	1	4715105	4843851	128747	1	55966	uc001aln.3	55910	ENSG00000196581	AJAP1	adherens junctions associated protein 1
chr1	4863523	4863664		X	X	Distal Intergenic	1	4715105	4843851	128747	1	55966	uc001aln.3	148418	ENSG00000196581	AJAP1	adherens junctions associated protein 1
chr1	5570015	5570164			X	Distal Intergenic	1	5624131	5624203	73	1	100616489	uc021ofm.1	-53967	NA	NA	NA
chr1	5743672	5743821		X	X	Distal Intergenic	1	5624131	5624203	73	1	100616489	uc021ofm.1	119541	NA	NA	NA
chr1	5805997	5806146			X	Distal Intergenic	1	5922732	5922801	70	2	100616421	uc021ofn.1	116655	ENSG00000264101	MIR4689	microRNA 4689
chr1	5831552	5831678		X	X	Distal Intergenic	1	5922732	5922801	70	2	100616421	uc021ofn.1	91123	ENSG00000264101	MIR4689	microRNA 4689
chr1	5890915	5891064			X	Distal Intergenic	1	5922732	5922801	70	2	100616421	uc021ofn.1	31737	ENSG00000264101	MIR4689	microRNA 4689
chr1	6040636	6040785		X		"Intron (uc001alq.2/261734, intron 2 of 29)"	1	6052358	6161253	108896	1	8514	uc009vlv.2	-11573	ENSG00000069424	KCNAB2	potassium voltage-gated channel subfamily A regulatory beta subunit 2
chr1	6060748	6060885		X	X	Promoter (8-9kb)	1	5937153	6052533	115381	2	261734	uc009vlt.2	-8215	ENSG00000131697	NPHP4	nephrocystin 4
chr1	6239924	6240073			X	Promoter (<=1kb)	1	6161847	6240194	78348	2	26038	uc001amb.2	121	ENSG00000116254	CHD5	chromodomain helicase DNA binding protein 5
chr1	6305265	6305414		X		Promoter (1-2kb)	1	6304252	6305638	1387	1	390992	uc009vly.2	1013	ENSG00000173673	HES3	hes family bHLH transcription factor 3
chr1	6321082	6321231		X		Promoter (<=1kb)	1	6307406	6321035	13630	2	387509	uc001amp.2	-47	ENSG00000158292	GPR153	G protein-coupled receptor 153
chr1	6412414	6412563		X		"Intron (uc001amq.3/11332, intron 1 of 8)"	1	6324332	6419004	94673	2	11332	uc001amq.3	6441	ENSG00000097021	ACOT7	acyl-CoA thioesterase 7
chr1	6419738	6419887		X		Promoter (<=1kb)	1	6324332	6419004	94673	2	11332	uc001amq.3	-734	ENSG00000097021	ACOT7	acyl-CoA thioesterase 7
chr1	6453410	6453559		X		Promoter (<=1kb)	1	6324332	6453826	129495	2	11332	uc001amt.3	267	ENSG00000097021	ACOT7	acyl-CoA thioesterase 7
chr1	6479952	6480101		X		Promoter (<=1kb)	1	6475294	6479979	4686	2	54626	uc001amx.3	0	ENSG00000069812	HES2	hes family bHLH transcription factor 2
chr1	6500438	6500587		X		Promoter (7-8kb)	1	6508103	6521004	12902	1	83715	uc001amz.3	-7516	ENSG00000187017	ESPN	espin
chr1	6500744	6500893		X		Promoter (7-8kb)	1	6508103	6521004	12902	1	83715	uc001amz.3	-7210	ENSG00000187017	ESPN	espin
chr1	6508014	6508163			X	Promoter (<=1kb)	1	6508103	6521004	12902	1	83715	uc001amz.3	0	ENSG00000187017	ESPN	espin
chr1	6509096	6509245	X			Promoter (<=1kb)	1	6508103	6521004	12902	1	83715	uc001amz.3	993	ENSG00000187017	ESPN	espin
chr1	6515257	6515406			X	"Intron (uc001amy.3/83715, intron 10 of 12)"	1	6508103	6521004	12902	1	83715	uc001amz.3	7154	ENSG00000187017	ESPN	espin
chr1	6526310	6526459			X	Promoter (<=1kb)	1	6524171	6526255	2085	2	8718	uc001ani.1	-55	ENSG00000215788	TNFRSF25	TNF receptor superfamily member 25
chr1	6577772	6577921	X	X		Promoter (2-3kb)	1	6526152	6580121	53970	2	57449	uc001anp.2	2200	ENSG00000171680	PLEKHG5	pleckstrin homology and RhoGEF domain containing G5
chr1	6580085	6580234		X		Promoter (<=1kb)	1	6526152	6580121	53970	2	57449	uc001anp.2	0	ENSG00000171680	PLEKHG5	pleckstrin homology and RhoGEF domain containing G5
chr1	6662814	6662963		X		Promoter (<=1kb)	1	6650779	6662929	12151	2	9903	uc001anz.1	0	ENSG00000162413	KLHL21	kelch like family member 21
chr1	6673552	6673701		X		Promoter (<=1kb)	1	6673756	6684093	10338	1	148479	uc001aob.4	-55	ENSG00000116273	PHF13	PHD finger protein 13
chr1	6845267	6845416		X		Promoter (<=1kb)	1	6845384	6932107	86724	1	23261	uc001aoh.3	0	ENSG00000171735	CAMTA1	calmodulin binding transcription activator 1
chr1	7149790	7149939	X			"Intron (uc001aoi.3/23261, intron 3 of 22)"	1	6845384	7829766	984383	1	23261	uc001aoi.3	304406	ENSG00000171735	CAMTA1	calmodulin binding transcription activator 1
chr1	7153419	7153568		X		"Intron (uc001aoi.3/23261, intron 4 of 22)"	1	6845384	7829766	984383	1	23261	uc001aoi.3	308035	ENSG00000171735	CAMTA1	calmodulin binding transcription activator 1
chr1	7615004	7615009	X	X		"Intron (uc001aoi.3/23261, intron 6 of 22)"	1	7732054	7805082	73029	1	23261	uc010nzv.1	-117045	ENSG00000171735	CAMTA1	calmodulin binding transcription activator 1
chr1	7615010	7615153	X	X	X	"Intron (uc001aoi.3/23261, intron 6 of 22)"	1	7732054	7805082	73029	1	23261	uc010nzv.1	-116901	ENSG00000171735	CAMTA1	calmodulin binding transcription activator 1
chr1	7618135	7618144	X	X		"Intron (uc001aoi.3/23261, intron 6 of 22)"	1	7732054	7805082	73029	1	23261	uc010nzv.1	-113910	ENSG00000171735	CAMTA1	calmodulin binding transcription activator 1
chr1	7618145	7618284	X	X	X	"Intron (uc001aoi.3/23261, intron 6 of 22)"	1	7732054	7805082	73029	1	23261	uc010nzv.1	-113770	ENSG00000171735	CAMTA1	calmodulin binding transcription activator 1
chr1	7648313	7648427	X	X	X	"Intron (uc001aoi.3/23261, intron 6 of 22)"	1	7732054	7805082	73029	1	23261	uc010nzv.1	-83627	ENSG00000171735	CAMTA1	calmodulin binding transcription activator 1
chr1	7648428	7648462	X	X		"Intron (uc001aoi.3/23261, intron 6 of 22)"	1	7732054	7805082	73029	1	23261	uc010nzv.1	-83592	ENSG00000171735	CAMTA1	calmodulin binding transcription activator 1
chr1	7682019	7682168		X		"Intron (uc001aoi.3/23261, intron 6 of 22)"	1	7732054	7805082	73029	1	23261	uc010nzv.1	-49886	ENSG00000171735	CAMTA1	calmodulin binding transcription activator 1
chr1	7729682	7729831			X	Promoter (2-3kb)	1	7732054	7805082	73029	1	23261	uc010nzv.1	-2223	ENSG00000171735	CAMTA1	calmodulin binding transcription activator 1
chr1	7764029	7764178		X		"Intron (uc001aoi.3/23261, intron 11 of 22)"	1	7740148	7829766	89619	1	23261	uc001aok.4	23881	ENSG00000171735	CAMTA1	calmodulin binding transcription activator 1
chr1	7812669	7812818		X		"Intron (uc001aoi.3/23261, intron 21 of 22)"	1	7804895	7829766	24872	1	23261	uc009vmf.3	7774	ENSG00000171735	CAMTA1	calmodulin binding transcription activator 1
chr1	7843943	7844092		X		Promoter (<=1kb)	1	7844380	7864018	19639	1	8863	uc001aon.3	-288	ENSG00000049246	PER3	period circadian regulator 3
chr1	7899711	7899838		X	X	"Intron (uc001aoo.3/8863, intron 20 of 20)"	1	7907672	7913178	5507	2	10911	uc001aor.3	13340	ENSG00000049247	UTS2	urotensin 2
chr1	7912952	7913101		X		Promoter (<=1kb)	1	7907672	7913178	5507	2	10911	uc001aor.3	77	ENSG00000049247	UTS2	urotensin 2
chr1	7945709	7945858		X		"Intron (uc001aoq.3/10911, intron 1 of 7)"	1	7903143	7973294	70152	2	10911	uc001aoq.3	27436	ENSG00000049247	UTS2	urotensin 2
chr1	7973145	7973294		X		Promoter (<=1kb)	1	7903143	7973294	70152	2	10911	uc001aoq.3	0	ENSG00000049247	UTS2	urotensin 2
chr1	7987325	7987418		X	X	"Intron (uc001aot.3/3604, intron 8 of 8)"	1	7903143	7973294	70152	2	10911	uc001aoq.3	-14031	ENSG00000049247	UTS2	urotensin 2
chr1	8086277	8086426		X		Promoter (<=1kb)	1	8071779	8086393	14615	2	54206	uc001aoz.3	0	ENSG00000116285	ERRFI1	ERBB receptor feedback inhibitor 1
chr1	8144247	8144396			X	Distal Intergenic	1	8071779	8086393	14615	2	54206	uc001aoz.3	-57854	ENSG00000116285	ERRFI1	ERBB receptor feedback inhibitor 1
chr1	8168055	8168055	X	X		Distal Intergenic	1	8071779	8086393	14615	2	54206	uc001aoz.3	-81662	ENSG00000116285	ERRFI1	ERBB receptor feedback inhibitor 1
chr1	8168056	8168204	X	X	X	Distal Intergenic	1	8071779	8086393	14615	2	54206	uc001aoz.3	-81663	ENSG00000116285	ERRFI1	ERBB receptor feedback inhibitor 1
chr1	8181140	8181145	X	X		Distal Intergenic	1	8071779	8086393	14615	2	54206	uc001aoz.3	-94747	ENSG00000116285	ERRFI1	ERBB receptor feedback inhibitor 1
chr1	8181146	8181289	X	X	X	Distal Intergenic	1	8071779	8086393	14615	2	54206	uc001aoz.3	-94753	ENSG00000116285	ERRFI1	ERBB receptor feedback inhibitor 1
chr1	8221649	8221769	X	X	X	Distal Intergenic	1	8071779	8086393	14615	2	54206	uc001aoz.3	-135256	ENSG00000116285	ERRFI1	ERBB receptor feedback inhibitor 1
chr1	8221770	8221798	X	X		Distal Intergenic	1	8071779	8086393	14615	2	54206	uc001aoz.3	-135377	ENSG00000116285	ERRFI1	ERBB receptor feedback inhibitor 1
chr1	8227314	8227459		X	X	Distal Intergenic	1	8071779	8086393	14615	2	54206	uc001aoz.3	-140921	ENSG00000116285	ERRFI1	ERBB receptor feedback inhibitor 1
chr1	8230288	8230366	X		X	Distal Intergenic	1	8071779	8086393	14615	2	54206	uc001aoz.3	-143895	ENSG00000116285	ERRFI1	ERBB receptor feedback inhibitor 1
chr1	8503758	8503907		X		"Intron (uc001ape.3/473, intron 12 of 23)"	1	8412464	8483747	71284	2	473	uc001apd.3	-20011	ENSG00000142599	RERE	arginine-glutamic acid dipeptide repeats
chr1	8623463	8623608		X	X	"Intron (uc001ape.3/473, intron 5 of 23)"	1	8420172	8585844	165673	2	473	uc010nzx.1	-37619	ENSG00000142599	RERE	arginine-glutamic acid dipeptide repeats
chr1	8624085	8624092	X	X		"Intron (uc001ape.3/473, intron 5 of 23)"	1	8420172	8585844	165673	2	473	uc010nzx.1	-38241	ENSG00000142599	RERE	arginine-glutamic acid dipeptide repeats
chr1	8624093	8624234	X	X	X	"Intron (uc001ape.3/473, intron 5 of 23)"	1	8420172	8585844	165673	2	473	uc010nzx.1	-38249	ENSG00000142599	RERE	arginine-glutamic acid dipeptide repeats
chr1	8686611	8686760	X	X		"Intron (uc001ape.3/473, intron 3 of 23)"	1	8420172	8585844	165673	2	473	uc010nzx.1	-100767	ENSG00000142599	RERE	arginine-glutamic acid dipeptide repeats
chr1	8763417	8763566		X		"Intron (uc001ape.3/473, intron 2 of 23)"	1	8525030	8813897	288868	2	473	uc001aph.1	50331	ENSG00000142599	RERE	arginine-glutamic acid dipeptide repeats
chr1	8877727	8877876		X		Promoter (<=1kb)	1	8412464	8877699	465236	2	473	uc001apf.3	-28	ENSG00000142599	RERE	arginine-glutamic acid dipeptide repeats
chr1	8968815	8968964	X	X		Distal Intergenic	1	8931006	8939151	8146	2	2023	uc009vmm.3	-29664	ENSG00000074800	ENO1	enolase 1
chr1	9062049	9062152	X	X	X	Downstream (1-2kb)	1	9063359	9086404	23046	2	155184	uc009vmo.1	24252	ENSG00000197241	SLC2A7	solute carrier family 2 member 7
chr1	9062153	9062198	X	X		Downstream (1-2kb)	1	9063359	9086404	23046	2	155184	uc009vmo.1	24206	ENSG00000197241	SLC2A7	solute carrier family 2 member 7
chr1	9242340	9242489		X		5' UTR	1	9211727	9211836	110	2	407040	uc021ofw.1	-30504	ENSG00000284357	MIR34A	microRNA 34a
chr1	9258700	9258849			X	Distal Intergenic	1	9294863	9331394	36532	1	9563	uc001apt.3	-36014	ENSG00000049239	H6PD	hexose-6-phosphate dehydrogenase/glucose 1-dehydrogenase
chr1	9294560	9294709		X		Promoter (<=1kb)	1	9294863	9331394	36532	1	9563	uc001apt.3	-154	ENSG00000049239	H6PD	hexose-6-phosphate dehydrogenase/glucose 1-dehydrogenase
chr1	9352808	9352957		X		Promoter (<=1kb)	1	9352941	9429590	76650	1	80176	uc010oae.2	0	ENSG00000171621	SPSB1	splA/ryanodine receptor domain and SOCS box containing 1
chr1	9380186	9380335			X	"Intron (uc010oae.2/80176, intron 1 of 2)"	1	9352941	9429590	76650	1	80176	uc010oae.2	27245	ENSG00000171621	SPSB1	splA/ryanodine receptor domain and SOCS box containing 1
chr1	9509295	9509444		X		Distal Intergenic	1	9599528	9642831	43304	1	84275	uc001apw.3	-90084	ENSG00000171612	SLC25A33	solute carrier family 25 member 33
chr1	9749649	9749798			X	Promoter (1-2kb)	1	9751525	9789172	37648	1	5293	uc010oaf.2	-1727	ENSG00000171608	PIK3CD	"phosphatidylinositol-4,5-bisphosphate 3-kinase catalytic subunit delta"
chr1	9865284	9865433		X		"Intron (uc001aqh.3/22883, intron 1 of 18)"	1	9789079	9884550	95472	2	22883	uc001aqh.3	19117	ENSG00000171603	CLSTN1	calsyntenin 1
chr1	9883983	9884128		X	X	Promoter (<=1kb)	1	9789079	9884550	95472	2	22883	uc001aqh.3	422	ENSG00000171603	CLSTN1	calsyntenin 1
chr1	9913151	9913300			X	"Intron (uc001aqk.1/56998, intron 5 of 5)"	1	9789079	9884550	95472	2	22883	uc010oag.2	-28601	ENSG00000171603	CLSTN1	calsyntenin 1
chr1	10092756	10092905		X		Promoter (<=1kb)	1	10093041	10241296	148256	1	10277	uc001aqr.4	-136	ENSG00000130939	UBE4B	ubiquitination factor E4B
chr1	10411987	10412136		X		"Intron (uc001aqw.4/23095, intron 35 of 46)"	1	10459085	10480201	21117	1	5226	uc001arc.3	-46949	ENSG00000142657	PGD	phosphogluconate dehydrogenase
chr1	10490634	10490783		X		Promoter (<=1kb)	1	10490804	10512060	21257	1	100526739	uc021ogf.1	-21	ENSG00000251503	CENPS-CORT	CENPS-CORT readthrough
chr1	10498734	10498883	X			"Intron (uc001are.3/378708, intron 3 of 4)"	1	10490804	10512060	21257	1	100526739	uc021ogg.1	7930	ENSG00000251503	CENPS-CORT	CENPS-CORT readthrough
chr1	10698428	10698577			X	3' UTR	1	10718064	10721455	3392	2	54897	uc001arq.1	22878	ENSG00000130940	CASZ1	castor zinc finger 1
chr1	10754768	10754903		X	X	Promoter (<=1kb)	1	10713041	10754507	41467	2	54897	uc009vmx.2	-261	ENSG00000130940	CASZ1	castor zinc finger 1
chr1	10764704	10764852		X	X	"Intron (uc001aro.4/54897, intron 3 of 20)"	1	10713041	10754507	41467	2	54897	uc009vmx.2	-10197	ENSG00000130940	CASZ1	castor zinc finger 1
chr1	10948481	10948630			X	Distal Intergenic	1	11006530	11024328	17799	2	148345	uc001arr.2	75698	ENSG00000175262	C1orf127	chromosome 1 open reading frame 127
chr1	10948952	10949095		X	X	Distal Intergenic	1	11006530	11024328	17799	2	148345	uc001arr.2	75233	ENSG00000175262	C1orf127	chromosome 1 open reading frame 127
chr1	10958475	10958624		X		Distal Intergenic	1	11006530	11024328	17799	2	148345	uc001arr.2	65704	ENSG00000175262	C1orf127	chromosome 1 open reading frame 127
chr1	11018793	11018942			X	"Exon (uc001arr.2/148345, exon 2 of 8)"	1	11006530	11024328	17799	2	148345	uc001arr.2	5386	ENSG00000175262	C1orf127	chromosome 1 open reading frame 127
chr1	11238495	11238590	X	X	X	"Intron (uc001asd.3/2475, intron 28 of 57)"	1	11249346	11256038	6693	1	10218	uc001ase.4	-10756	ENSG00000171819	ANGPTL7	angiopoietin like 7
chr1	11238591	11238644	X	X		"Intron (uc001asd.3/2475, intron 28 of 57)"	1	11249346	11256038	6693	1	10218	uc001ase.4	-10702	ENSG00000171819	ANGPTL7	angiopoietin like 7
chr1	11372428	11372482	X	X		Distal Intergenic	1	11333255	11348491	15237	1	29914	uc001asg.3	39173	ENSG00000120942	UBIAD1	UbiA prenyltransferase domain containing 1
chr1	11372483	11372577	X	X	X	Distal Intergenic	1	11333255	11348491	15237	1	29914	uc001asg.3	39228	ENSG00000120942	UBIAD1	UbiA prenyltransferase domain containing 1
chr1	11400065	11400214		X		Distal Intergenic	1	11333255	11348491	15237	1	29914	uc001asg.3	66810	ENSG00000120942	UBIAD1	UbiA prenyltransferase domain containing 1
chr1	11539091	11539240		X		Promoter (<=1kb)	1	11539295	11541938	2644	1	57540	uc009vmz.1	-55	ENSG00000204624	DISP3	dispatched RND transporter family member 3
chr1	11581473	11581605	X	X	X	"Intron (uc001ash.4/57540, intron 10 of 20)"	1	11561047	11586928	25882	1	57540	uc001asi.1	20426	ENSG00000204624	DISP3	dispatched RND transporter family member 3
chr1	11581606	11581622	X	X		"Intron (uc001ash.4/57540, intron 10 of 20)"	1	11561047	11586928	25882	1	57540	uc001asi.1	20559	ENSG00000204624	DISP3	dispatched RND transporter family member 3
chr1	11598648	11598720		X	X	Distal Intergenic	1	11561047	11586928	25882	1	57540	uc001asi.1	37601	ENSG00000204624	DISP3	dispatched RND transporter family member 3
chr1	11600002	11600150		X	X	Distal Intergenic	1	11561047	11586928	25882	1	57540	uc001asi.1	38955	ENSG00000204624	DISP3	dispatched RND transporter family member 3
chr1	11618553	11618647		X	X	Distal Intergenic	1	11561047	11586928	25882	1	57540	uc001asi.1	57506	ENSG00000204624	DISP3	dispatched RND transporter family member 3
chr1	11623732	11623881		X		Distal Intergenic	1	11561047	11586928	25882	1	57540	uc001asi.1	62685	ENSG00000204624	DISP3	dispatched RND transporter family member 3
chr1	11647424	11647560		X	X	Distal Intergenic	1	11709144	11714401	5258	2	26232	uc009vnb.1	66841	ENSG00000116661	FBXO2	F-box protein 2
chr1	11714726	11714872		X	X	Promoter (<=1kb)	1	11708418	11714888	6471	2	26232	uc001asj.3	16	ENSG00000116661	FBXO2	F-box protein 2
chr1	11741206	11741355		X		Promoter (<=1kb)	1	11734537	11741495	6959	2	10459	uc001asp.3	140	ENSG00000116670	MAD2L2	mitotic arrest deficient 2 like 2
chr1	11751574	11751723		X		Promoter (<=1kb)	1	11734537	11751678	17142	2	10459	uc001asq.4	0	ENSG00000116670	MAD2L2	mitotic arrest deficient 2 like 2
chr1	11863614	11863763		X		Promoter (<=1kb)	1	11845787	11863440	17654	2	4524	uc001atb.1	-174	ENSG00000177000	MTHFR	methylenetetrahydrofolate reductase
chr1	11865987	11866136		X		Promoter (<=1kb)	1	11866153	11876844	10692	1	1185	uc009vne.2	-17	ENSG00000011021	CLCN6	chloride voltage-gated channel 6
chr1	11907817	11907956		X	X	Promoter (<=1kb)	1	11905767	11907840	2074	2	4878	uc001ati.3	0	ENSG00000175206	NPPA	natriuretic peptide A
chr1	11936254	11936403			X	Distal Intergenic	1	11917521	11918992	1472	2	4879	uc001atj.3	-17262	ENSG00000120937	NPPB	natriuretic peptide B
chr1	11968568	11968717		X		Distal Intergenic	1	11979645	11986485	6841	2	90231	uc001atk.3	17768	ENSG00000116685	KIAA2013	KIAA2013
chr1	11968993	11969142		X		Distal Intergenic	1	11979645	11986485	6841	2	90231	uc001atk.3	17343	ENSG00000116685	KIAA2013	KIAA2013
chr1	11969393	11969542		X		Distal Intergenic	1	11979645	11986485	6841	2	90231	uc001atk.3	16943	ENSG00000116685	KIAA2013	KIAA2013
chr1	12040292	12040441		X		Promoter (<=1kb)	1	12040238	12073572	33335	1	9927	uc009vni.3	54	ENSG00000116688	MFN2	mitofusin 2
chr1	12079313	12079462		X		Promoter (<=1kb)	1	12079299	12092106	12808	1	60672	uc001ato.2	14	ENSG00000116691	MIIP	migration and invasion inhibitory protein
chr1	12097709	12097826		X	X	Distal Intergenic	1	12079299	12092106	12808	1	60672	uc001ato.2	18410	ENSG00000116691	MIIP	migration and invasion inhibitory protein
chr1	12221959	12222108		X		Promoter (4-5kb)	1	12227060	12269277	42218	1	7133	uc001att.3	-4952	ENSG00000028137	TNFRSF1B	TNF receptor superfamily member 1B
chr1	12235218	12235367		X		"Intron (uc001att.3/7133, intron 1 of 9)"	1	12227060	12269277	42218	1	7133	uc009vnk.3	8158	ENSG00000028137	TNFRSF1B	TNF receptor superfamily member 1B
chr1	12244377	12244526		X		Promoter (7-8kb)	1	12251762	12251839	78	1	100616438	uc021ogi.1	-7236	ENSG00000263676	MIR4632	microRNA 4632
chr1	12441413	12441562			X	"Intron (uc001atv.3/55187, intron 57 of 69)"	1	12427725	12572098	144374	1	55187	uc009vnl.3	13688	ENSG00000048707	VPS13D	vacuolar protein sorting 13 homolog D
chr1	12493684	12493833		X		"Intron (uc001atv.3/55187, intron 65 of 69)"	1	12469884	12572098	102215	1	55187	uc010obd.2	23800	ENSG00000048707	VPS13D	vacuolar protein sorting 13 homolog D
chr1	12509030	12509128	X	X	X	"Intron (uc001atv.3/55187, intron 65 of 69)"	1	12469884	12572098	102215	1	55187	uc010obd.2	39146	ENSG00000048707	VPS13D	vacuolar protein sorting 13 homolog D
chr1	12509129	12509179	X	X		"Intron (uc001atv.3/55187, intron 65 of 69)"	1	12469884	12572098	102215	1	55187	uc010obd.2	39245	ENSG00000048707	VPS13D	vacuolar protein sorting 13 homolog D
chr1	12591510	12591659		X		Distal Intergenic	1	12567300	12567451	152	1	677882	uc001atz.1	24210	ENSG00000266079	SNORA59B	"small nucleolar RNA, H/ACA box 59B"
chr1	12655285	12655434		X		Promoter (<=1kb)	1	12640551	12656106	15556	2	9249	uc001aue.1	672	ENSG00000162496	DHRS3	dehydrogenase/reductase 3
chr1	12655926	12656075		X		Promoter (<=1kb)	1	12640551	12656106	15556	2	9249	uc001aue.1	31	ENSG00000162496	DHRS3	dehydrogenase/reductase 3
chr1	12664506	12664655		X		Promoter (8-9kb)	1	12640551	12656106	15556	2	9249	uc001aue.1	-8400	ENSG00000162496	DHRS3	dehydrogenase/reductase 3
chr1	12678305	12678454		X		Promoter (<=1kb)	1	12640131	12677820	37690	2	9249	uc001aud.4	-485	ENSG00000162496	DHRS3	dehydrogenase/reductase 3
chr1	12714785	12714901	X		X	"Intron (uc001auf.3/343066, intron 2 of 3)"	1	12704566	12727097	22532	1	343066	uc001auf.3	10219	ENSG00000204518	AADACL4	arylacetamide deacetylase like 4
chr1	13910214	13910363		X		Promoter (<=1kb)	1	13910252	13944452	34201	1	10630	uc001avc.3	0	ENSG00000162493	PDPN	podoplanin
chr1	14026627	14026776			X	Promoter (<=1kb)	1	14026735	14151574	124840	1	7799	uc001avg.3	0	ENSG00000116731	PRDM2	PR/SET domain 2
chr1	14075816	14075965		X		Promoter (<=1kb)	1	14075856	14107358	31503	1	7799	uc021ogk.1	0	ENSG00000116731	PRDM2	PR/SET domain 2
chr1	14215128	14215277	X			Distal Intergenic	1	14075856	14151574	75719	1	7799	uc009vof.3	139272	ENSG00000116731	PRDM2	PR/SET domain 2
chr1	14278965	14279078	X	X		Distal Intergenic	1	14075856	14151574	75719	1	7799	uc009vof.3	203109	ENSG00000116731	PRDM2	PR/SET domain 2
chr1	14279079	14279114	X	X	X	Distal Intergenic	1	14075856	14151574	75719	1	7799	uc009vof.3	203223	ENSG00000116731	PRDM2	PR/SET domain 2
chr1	14279587	14279733		X	X	Distal Intergenic	1	14075856	14151574	75719	1	7799	uc009vof.3	203731	ENSG00000116731	PRDM2	PR/SET domain 2
chr1	14445396	14445545		X		Distal Intergenic	1	14075856	14151574	75719	1	7799	uc009vof.3	369540	ENSG00000116731	PRDM2	PR/SET domain 2
chr1	14671673	14671822		X		Distal Intergenic	1	14925213	15394651	469439	1	23254	uc009vog.1	-253391	ENSG00000189337	KAZN	"kazrin, periplakin interacting protein"
chr1	14672838	14672987		X		Distal Intergenic	1	14925213	15394651	469439	1	23254	uc009vog.1	-252226	ENSG00000189337	KAZN	"kazrin, periplakin interacting protein"
chr1	14717515	14717612	X	X	X	Distal Intergenic	1	14925213	15394651	469439	1	23254	uc009vog.1	-207601	ENSG00000189337	KAZN	"kazrin, periplakin interacting protein"
chr1	14717613	14717664	X	X		Distal Intergenic	1	14925213	15394651	469439	1	23254	uc009vog.1	-207549	ENSG00000189337	KAZN	"kazrin, periplakin interacting protein"
chr1	14769810	14769959		X		Distal Intergenic	1	14925213	15394651	469439	1	23254	uc009vog.1	-155254	ENSG00000189337	KAZN	"kazrin, periplakin interacting protein"
chr1	14925165	14925314		X		Promoter (<=1kb)	1	14925213	15394651	469439	1	23254	uc009vog.1	0	ENSG00000189337	KAZN	"kazrin, periplakin interacting protein"
chr1	14953855	14954004		X		"Intron (uc009vog.1/23254, intron 1 of 7)"	1	14925213	15444544	519332	1	23254	uc001avm.4	28642	ENSG00000189337	KAZN	"kazrin, periplakin interacting protein"
chr1	14976090	14976239		X		"Intron (uc009vog.1/23254, intron 1 of 7)"	1	14925213	15444544	519332	1	23254	uc001avm.4	50877	ENSG00000189337	KAZN	"kazrin, periplakin interacting protein"
chr1	15009531	15009667	X	X	X	"Intron (uc009vog.1/23254, intron 1 of 7)"	1	14925213	15444544	519332	1	23254	uc001avm.4	84318	ENSG00000189337	KAZN	"kazrin, periplakin interacting protein"
chr1	15009668	15009680	X	X		"Intron (uc009vog.1/23254, intron 1 of 7)"	1	14925213	15444544	519332	1	23254	uc001avm.4	84455	ENSG00000189337	KAZN	"kazrin, periplakin interacting protein"
chr1	15023576	15023714	X	X	X	"Intron (uc009vog.1/23254, intron 1 of 7)"	1	14925213	15444544	519332	1	23254	uc001avm.4	98363	ENSG00000189337	KAZN	"kazrin, periplakin interacting protein"
chr1	15023715	15023725	X	X		"Intron (uc009vog.1/23254, intron 1 of 7)"	1	14925213	15444544	519332	1	23254	uc001avm.4	98502	ENSG00000189337	KAZN	"kazrin, periplakin interacting protein"
chr1	15052363	15052450		X	X	"Intron (uc009vog.1/23254, intron 1 of 7)"	1	14925213	15444544	519332	1	23254	uc001avm.4	127150	ENSG00000189337	KAZN	"kazrin, periplakin interacting protein"
chr1	15082448	15082597	X	X		"Intron (uc009vog.1/23254, intron 1 of 7)"	1	14925213	15444544	519332	1	23254	uc001avm.4	157235	ENSG00000189337	KAZN	"kazrin, periplakin interacting protein"
chr1	15093733	15093878	X	X	X	"Intron (uc009vog.1/23254, intron 1 of 7)"	1	15250625	15394651	144027	1	23254	uc001avo.2	-156747	ENSG00000189337	KAZN	"kazrin, periplakin interacting protein"
chr1	15093879	15093882	X	X		"Intron (uc009vog.1/23254, intron 1 of 7)"	1	15250625	15394651	144027	1	23254	uc001avo.2	-156743	ENSG00000189337	KAZN	"kazrin, periplakin interacting protein"
chr1	15109830	15109976		X	X	"Intron (uc009vog.1/23254, intron 1 of 7)"	1	15250625	15394651	144027	1	23254	uc001avo.2	-140649	ENSG00000189337	KAZN	"kazrin, periplakin interacting protein"
chr1	15129244	15129393	X	X		"Intron (uc009vog.1/23254, intron 1 of 7)"	1	15250625	15394651	144027	1	23254	uc001avo.2	-121232	ENSG00000189337	KAZN	"kazrin, periplakin interacting protein"
chr1	15202374	15202523		X	X	"Intron (uc009vog.1/23254, intron 1 of 7)"	1	15250625	15394651	144027	1	23254	uc001avo.2	-48102	ENSG00000189337	KAZN	"kazrin, periplakin interacting protein"
chr1	15221811	15221937		X	X	"Intron (uc009vog.1/23254, intron 1 of 7)"	1	15250625	15394651	144027	1	23254	uc001avo.2	-28688	ENSG00000189337	KAZN	"kazrin, periplakin interacting protein"
chr1	15227930	15228079		X		"Intron (uc009vog.1/23254, intron 1 of 7)"	1	15250625	15394651	144027	1	23254	uc001avo.2	-22546	ENSG00000189337	KAZN	"kazrin, periplakin interacting protein"
chr1	15466408	15466557		X		"Intron (uc001avv.4/200197, intron 1 of 4)"	1	15438311	15478960	40650	2	200197	uc001avv.4	12403	ENSG00000175147	TMEM51-AS1	TMEM51 antisense RNA 1
chr1	15480045	15480194		X		Promoter (<=1kb)	1	15480229	15546874	66646	1	55092	uc001avz.3	-35	ENSG00000171729	TMEM51	transmembrane protein 51
chr1	15827173	15827322		X		"Intron (uc001awm.2/842, intron 6 of 7)"	1	15817324	15850940	33617	2	842	uc001awm.2	23618	ENSG00000132906	CASP9	caspase 9
chr1	15853149	15853298		X		Promoter (<=1kb)	1	15853352	15893091	39740	1	23341	uc001awr.1	-54	ENSG00000116138	DNAJC16	DnaJ heat shock protein family (Hsp40) member C16
chr1	15943721	15943870		X		Promoter (<=1kb)	1	15943953	15960796	16844	1	84301	uc001aww.3	-83	ENSG00000197312	DDI2	DNA damage inducible 1 homolog 2
chr1	16003566	16003715		X		Promoter (7-8kb)	1	16010827	16061264	50438	1	23207	uc010obo.2	-7112	ENSG00000116786	PLEKHM2	pleckstrin homology and RUN domain containing M2
chr1	16011435	16011584			X	Promoter (<=1kb)	1	16010827	16061264	50438	1	23207	uc010obo.2	608	ENSG00000116786	PLEKHM2	pleckstrin homology and RUN domain containing M2
chr1	16085083	16085232		X		Promoter (<=1kb)	1	16085255	16113084	27830	1	54751	uc001axe.1	-23	ENSG00000162458	FBLIM1	filamin binding LIM protein 1
chr1	16126759	16126908		X		Distal Intergenic	1	16133657	16134194	538	2	440567	uc009vol.1	7286	ENSG00000233954	UQCRHL	ubiquinol-cytochrome c reductase hinge protein like
chr1	16161404	16161553		X		"Exon (uc001axj.2/729614, exon 2 of 2)"	1	16174359	16266950	92592	1	23013	uc001axk.1	-12806	ENSG00000065526	SPEN	spen family transcriptional repressor
chr1	16162393	16162542		X		"Exon (uc001axj.2/729614, exon 2 of 2)"	1	16174359	16266950	92592	1	23013	uc001axk.1	-11817	ENSG00000065526	SPEN	spen family transcriptional repressor
chr1	16288159	16288308			X	"Intron (uc001axl.4/7709, intron 2 of 15)"	1	16268364	16302627	34264	2	7709	uc001axl.4	14319	ENSG00000116809	ZBTB17	zinc finger and BTB domain containing 17
chr1	16339750	16339899		X		Downstream (<1kb)	1	16340523	16345285	4763	2	27129	uc001axo.2	5386	ENSG00000173641	HSPB7	heat shock protein family B (small) member 7
chr1	16353309	16353458		X		Promoter (1-2kb)	1	16355007	16357169	2163	1	1187	uc010obx.1	-1549	ENSG00000186510	CLCNKA	chloride voltage-gated channel Ka
chr1	16399615	16399764			X	Promoter (<=1kb)	1	16384264	16400127	15864	2	348487	uc001axz.4	363	ENSG00000185519	FAM131C	family with sequence similarity 131 member C
chr1	16400076	16400217	X		X	Promoter (<=1kb)	1	16384264	16400127	15864	2	348487	uc001axz.4	0	ENSG00000185519	FAM131C	family with sequence similarity 131 member C
chr1	16442500	16442648		X	X	Distal Intergenic	1	16450832	16482582	31751	2	1969	uc001aya.2	39934	ENSG00000142627	EPHA2	EPH receptor A2
chr1	16470418	16470566		X	X	"Intron (uc001aya.2/1969, intron 3 of 16)"	1	16450832	16482582	31751	2	1969	uc001aya.2	12016	ENSG00000142627	EPHA2	EPH receptor A2
chr1	16472879	16473028		X		"Intron (uc001aya.2/1969, intron 3 of 16)"	1	16450832	16482582	31751	2	1969	uc001aya.2	9554	ENSG00000142627	EPHA2	EPH receptor A2
chr1	16678936	16679085		X		Promoter (<=1kb)	1	16576559	16678948	102390	2	54455	uc001ayg.3	0	ENSG00000037637	FBXO42	F-box protein 42
chr1	16693562	16693711		X		Promoter (<=1kb)	1	16693525	16724643	31119	1	26099	uc031plh.1	37	ENSG00000055070	SZRD1	SUZ RNA binding domain containing 1
chr1	16825686	16825833		X	X	Promoter (6-7kb)	1	16793931	16819196	25266	2	114819	uc001ayt.2	-6490	ENSG00000080947	CROCCP3	"ciliary rootlet coiled-coil, rootletin pseudogene 3"
chr1	16840501	16840650		X		Distal Intergenic	1	16793931	16819196	25266	2	114819	uc001ayt.2	-21305	ENSG00000080947	CROCCP3	"ciliary rootlet coiled-coil, rootletin pseudogene 3"
chr1	16965991	16966124	X	X	X	"Intron (uc001azg.1/84809, intron 2 of 9)"	1	16951873	16971178	19306	2	84809	uc001azg.1	5054	ENSG00000215908	CROCCP2	"ciliary rootlet coiled-coil, rootletin pseudogene 2"
chr1	16966125	16966140	X	X		"Intron (uc001azg.1/84809, intron 2 of 9)"	1	16951873	16971178	19306	2	84809	uc001azg.1	5038	ENSG00000215908	CROCCP2	"ciliary rootlet coiled-coil, rootletin pseudogene 2"
chr1	16973849	16973998			X	Promoter (<=1kb)	1	16973908	16976915	3008	1	11209	uc001azm.4	0	NA	MST1P2	macrophage stimulating 1 pseudogene 2
chr1	17013915	17014062	X		X	Distal Intergenic	1	17007750	17007823	74	1	100500876	uc021ogy.1	6165	ENSG00000263811	MIR3675	microRNA 3675
chr1	17020387	17020536			X	"Intron (uc001azn.1/284729, intron 10 of 10)"	1	17007750	17007823	74	1	100500876	uc021ogy.1	12637	ENSG00000263811	MIR3675	microRNA 3675
chr1	17027122	17027269		X	X	"Intron (uc001azn.1/284729, intron 6 of 10)"	1	17007750	17007823	74	1	100500876	uc021ogy.1	19372	ENSG00000263811	MIR3675	microRNA 3675
chr1	17222660	17222809		X		"Exon (uc021ohi.1/uc021ohi.1, exon 1 of 1)"	1	17248445	17299474	51030	1	9696	uc001azt.2	-25636	ENSG00000058453	CROCC	"ciliary rootlet coiled-coil, rootletin"
chr1	17231360	17231509		X		"Intron (uc009voy.1/9696, intron 1 of 8)"	1	17248445	17299474	51030	1	9696	uc001azt.2	-16936	ENSG00000058453	CROCC	"ciliary rootlet coiled-coil, rootletin"
chr1	17240436	17240585		X		Promoter (7-8kb)	1	17248445	17299474	51030	1	9696	uc001azt.2	-7860	ENSG00000058453	CROCC	"ciliary rootlet coiled-coil, rootletin"
chr1	17493655	17493804	X			Distal Intergenic	1	17531621	17572501	40881	1	29943	uc001bah.1	-37817	ENSG00000142623	PADI1	peptidyl arginine deiminase 1
chr1	17764370	17764514		X	X	Promoter (<=1kb)	1	17733251	17765059	31809	2	55920	uc001bal.3	545	ENSG00000179051	RCC2	regulator of chromosome condensation 2
chr1	17764981	17765130			X	Promoter (<=1kb)	1	17733251	17765059	31809	2	55920	uc001bal.3	0	ENSG00000179051	RCC2	regulator of chromosome condensation 2
chr1	17848571	17848714		X	X	Promoter (1-2kb)	1	17846827	17909697	62871	1	55160	uc031pli.1	1744	ENSG00000074964	ARHGEF10L	Rho guanine nucleotide exchange factor 10 like
chr1	17858787	17858936		X		Promoter (7-8kb)	1	17866330	18016673	150344	1	55160	uc009vpe.1	-7394	ENSG00000074964	ARHGEF10L	Rho guanine nucleotide exchange factor 10 like
chr1	17914568	17914700		X	X	Promoter (<=1kb)	1	17914911	17966476	51566	1	55160	uc010ocr.1	-211	ENSG00000074964	ARHGEF10L	Rho guanine nucleotide exchange factor 10 like
chr1	18028094	18028242		X	X	Distal Intergenic	1	18020542	18024370	3829	1	55160	uc001bas.3	7552	ENSG00000074964	ARHGEF10L	Rho guanine nucleotide exchange factor 10 like
chr1	18030802	18030942		X	X	Distal Intergenic	1	18020542	18024370	3829	1	55160	uc001bas.3	10260	ENSG00000074964	ARHGEF10L	Rho guanine nucleotide exchange factor 10 like
chr1	18145864	18145940		X	X	"Intron (uc001bat.3/81569, intron 1 of 2)"	1	18081808	18153558	71751	1	81569	uc001bat.3	64056	ENSG00000117148	ACTL8	actin like 8
chr1	18196115	18196225	X	X		Distal Intergenic	1	18081808	18153558	71751	1	81569	uc001bat.3	114307	ENSG00000117148	ACTL8	actin like 8
chr1	18196226	18196264	X	X	X	Distal Intergenic	1	18081808	18153558	71751	1	81569	uc001bat.3	114418	ENSG00000117148	ACTL8	actin like 8
chr1	18212604	18212609	X	X		Distal Intergenic	1	18081808	18153558	71751	1	81569	uc001bat.3	130796	ENSG00000117148	ACTL8	actin like 8
chr1	18212610	18212753	X	X	X	Distal Intergenic	1	18081808	18153558	71751	1	81569	uc001bat.3	130802	ENSG00000117148	ACTL8	actin like 8
chr1	18285048	18285189		X	X	Distal Intergenic	1	18434240	18704977	270738	1	84966	uc001bau.2	-149051	ENSG00000117154	IGSF21	immunoglobin superfamily member 21
chr1	18335989	18336129		X	X	Distal Intergenic	1	18434240	18704977	270738	1	84966	uc001bau.2	-98111	ENSG00000117154	IGSF21	immunoglobin superfamily member 21
chr1	18417282	18417431		X		Distal Intergenic	1	18434240	18704977	270738	1	84966	uc001bau.2	-16809	ENSG00000117154	IGSF21	immunoglobin superfamily member 21
chr1	18419785	18419934			X	Distal Intergenic	1	18434240	18704977	270738	1	84966	uc001bau.2	-14306	ENSG00000117154	IGSF21	immunoglobin superfamily member 21
chr1	18503198	18503347			X	"Intron (uc001bau.2/84966, intron 1 of 9)"	1	18434240	18704977	270738	1	84966	uc001bau.2	68958	ENSG00000117154	IGSF21	immunoglobin superfamily member 21
chr1	18517206	18517341		X	X	"Intron (uc001bau.2/84966, intron 1 of 9)"	1	18434240	18704977	270738	1	84966	uc001bau.2	82966	ENSG00000117154	IGSF21	immunoglobin superfamily member 21
chr1	18526141	18526141	X	X		"Intron (uc001bau.2/84966, intron 1 of 9)"	1	18434240	18704977	270738	1	84966	uc001bau.2	91901	ENSG00000117154	IGSF21	immunoglobin superfamily member 21
chr1	18526142	18526290	X	X	X	"Intron (uc001bau.2/84966, intron 1 of 9)"	1	18434240	18704977	270738	1	84966	uc001bau.2	91902	ENSG00000117154	IGSF21	immunoglobin superfamily member 21
chr1	18659242	18659391			X	"Intron (uc001bau.2/84966, intron 3 of 9)"	1	18687861	18704977	17117	1	84966	uc001bav.2	-28470	ENSG00000117154	IGSF21	immunoglobin superfamily member 21
chr1	18681244	18681390		X	X	Promoter (6-7kb)	1	18687861	18704977	17117	1	84966	uc001bav.2	-6471	ENSG00000117154	IGSF21	immunoglobin superfamily member 21
chr1	18725114	18725263			X	Distal Intergenic	1	18687861	18704977	17117	1	84966	uc001bav.2	37253	ENSG00000117154	IGSF21	immunoglobin superfamily member 21
chr1	18823387	18823534		X	X	Distal Intergenic	1	18807424	18812480	5057	1	127707	uc001bax.3	15963	ENSG00000179023	KLHDC7A	kelch domain containing 7A
chr1	18957747	18957896		X		Promoter (<=1kb)	1	18957500	19075360	117861	1	5081	uc010oct.2	247	ENSG00000009709	PAX7	paired box 7
chr1	18966872	18967001		X	X	"Intron (uc001bay.3/5081, intron 4 of 7)"	1	18957500	19075360	117861	1	5081	uc010oct.2	9372	ENSG00000009709	PAX7	paired box 7
chr1	18967520	18967657		X	X	"Intron (uc001bay.3/5081, intron 4 of 7)"	1	18957500	19075360	117861	1	5081	uc010oct.2	10020	ENSG00000009709	PAX7	paired box 7
chr1	18976648	18976794		X	X	"Intron (uc001bay.3/5081, intron 4 of 7)"	1	18957500	19075360	117861	1	5081	uc010oct.2	19148	ENSG00000009709	PAX7	paired box 7
chr1	19048967	19049063		X	X	"Intron (uc001bay.3/5081, intron 7 of 7)"	1	18957500	19075360	117861	1	5081	uc010oct.2	91467	ENSG00000009709	PAX7	paired box 7
chr1	19095732	19095876	X	X	X	Distal Intergenic	1	19166093	19186155	20063	2	80834	uc001bba.1	90279	ENSG00000179002	TAS1R2	taste 1 receptor member 2
chr1	19095877	19095881	X	X		Distal Intergenic	1	19166093	19186155	20063	2	80834	uc001bba.1	90274	ENSG00000179002	TAS1R2	taste 1 receptor member 2
chr1	19121204	19121347		X	X	Distal Intergenic	1	19166093	19186155	20063	2	80834	uc001bba.1	64808	ENSG00000179002	TAS1R2	taste 1 receptor member 2
chr1	19222960	19222964	X	X		Promoter (5-6kb)	1	19197924	19217385	19462	2	8659	uc010ocu.2	-5575	ENSG00000159423	ALDH4A1	aldehyde dehydrogenase 4 family member A1
chr1	19222965	19223109	X	X	X	Promoter (5-6kb)	1	19197924	19217385	19462	2	8659	uc010ocu.2	-5580	ENSG00000159423	ALDH4A1	aldehyde dehydrogenase 4 family member A1
chr1	19265305	19265454		X		"Intron (uc001bbd.2/126917, intron 1 of 8)"	1	19230774	19282826	52053	2	126917	uc001bbd.2	17372	ENSG00000169991	IFFO2	intermediate filament family orphan 2
chr1	19305356	19305505			X	Distal Intergenic	1	19230774	19282826	52053	2	126917	uc001bbd.2	-22530	ENSG00000169991	IFFO2	intermediate filament family orphan 2
chr1	19306348	19306497		X		Distal Intergenic	1	19230774	19282826	52053	2	126917	uc001bbd.2	-23522	ENSG00000169991	IFFO2	intermediate filament family orphan 2
chr1	19334210	19334345	X	X	X	Distal Intergenic	1	19230774	19282826	52053	2	126917	uc001bbd.2	-51384	ENSG00000169991	IFFO2	intermediate filament family orphan 2
chr1	19334346	19334359	X	X		Distal Intergenic	1	19230774	19282826	52053	2	126917	uc001bbd.2	-51520	ENSG00000169991	IFFO2	intermediate filament family orphan 2
chr1	19680202	19680351			X	"Intron (uc010ocz.2/832, intron 6 of 8)"	1	19638740	19658922	20183	1	54896	uc021ohq.1	41462	ENSG00000040487	PQLC2	PQ loop repeat containing 2
chr1	19690413	19690562		X		"Intron (uc010ocz.2/832, intron 4 of 8)"	1	19638740	19658922	20183	1	54896	uc021ohq.1	51673	ENSG00000040487	PQLC2	PQ loop repeat containing 2
chr1	19812091	19812240			X	Promoter (<=1kb)	1	19665267	19812066	146800	2	832	uc021ohr.1	-25	ENSG00000077549	CAPZB	capping actin protein of muscle Z-line beta subunit
chr1	19856201	19856350		X		Distal Intergenic	1	19665267	19812066	146800	2	832	uc021ohr.1	-44135	ENSG00000077549	CAPZB	capping actin protein of muscle Z-line beta subunit
chr1	19908867	19909016			X	Distal Intergenic	1	19923471	19984949	61479	1	100532736	uc009vpl.2	-14455	ENSG00000270136	MINOS1-NBL1	MINOS1-NBL1 readthrough
chr1	19970634	19970783			X	Promoter (<=1kb)	1	19970667	19984949	14283	1	4681	uc001bck.3	0	ENSG00000158747	NBL1	"neuroblastoma 1, DAN family BMP antagonist"
chr1	20525609	20525612	X	X		Distal Intergenic	1	20512578	20519942	7365	1	127733	uc001bdb.3	13031	ENSG00000162543	UBXN10	UBX domain protein 10
chr1	20525613	20525758	X	X	X	Distal Intergenic	1	20512578	20519942	7365	1	127733	uc001bdb.3	13035	ENSG00000162543	UBXN10	UBX domain protein 10
chr1	20635134	20635266		X	X	"Intron (uc001bdd.2/127731, intron 1 of 14)"	1	20617412	20681387	63976	1	127731	uc010odc.1	17722	ENSG00000158816	VWA5B1	von Willebrand factor A domain containing 5B1
chr1	20775299	20775421	X	X	X	Distal Intergenic	1	20686294	20755287	68994	2	339505	uc001bdf.2	-20012	NA	LINC01141	long intergenic non-protein coding RNA 1141
chr1	20775422	20775448	X	X		Distal Intergenic	1	20686294	20755287	68994	2	339505	uc001bdf.2	-20135	NA	LINC01141	long intergenic non-protein coding RNA 1141
chr1	20776049	20776118	X	X		Distal Intergenic	1	20686294	20755287	68994	2	339505	uc001bdf.2	-20762	NA	LINC01141	long intergenic non-protein coding RNA 1141
chr1	20776119	20776198	X	X	X	Distal Intergenic	1	20686294	20755287	68994	2	339505	uc001bdf.2	-20832	NA	LINC01141	long intergenic non-protein coding RNA 1141
chr1	20802990	20803139			X	Distal Intergenic	1	20808884	20812728	3845	2	55450	uc001bdh.3	9589	ENSG00000162545	CAMK2N1	calcium/calmodulin dependent protein kinase II inhibitor 1
chr1	20959854	20960003			X	Promoter (<=1kb)	1	20959948	20978004	18057	1	65018	uc001bdm.3	0	ENSG00000158828	PINK1	PTEN induced putative kinase 1
chr1	20960344	20960493		X		Promoter (<=1kb)	1	20959948	20978004	18057	1	65018	uc001bdm.3	396	ENSG00000158828	PINK1	PTEN induced putative kinase 1
chr1	21058643	21058792		X		Promoter (<=1kb)	1	21046225	21059133	12909	2	400745	uc001bdt.1	341	ENSG00000189410	SH2D5	SH2 domain containing 5
chr1	21113382	21113531		X		Promoter (<=1kb)	1	21069171	21113181	44011	2	50809	uc001bdw.1	-201	ENSG00000127483	HP1BP3	heterochromatin protein 1 binding protein 3
chr1	21384684	21384696	X	X		Promoter (7-8kb)	1	21267738	21377487	109750	2	8672	uc001beg.3	-7197	ENSG00000075151	EIF4G3	eukaryotic translation initiation factor 4 gamma 3
chr1	21384697	21384833	X	X	X	Promoter (7-8kb)	1	21267738	21377487	109750	2	8672	uc001beg.3	-7210	ENSG00000075151	EIF4G3	eukaryotic translation initiation factor 4 gamma 3
chr1	21433343	21433471	X	X	X	"Intron (uc001bec.3/8672, intron 1 of 31)"	1	21132785	21437876	305092	2	8672	uc001bec.3	4405	ENSG00000075151	EIF4G3	eukaryotic translation initiation factor 4 gamma 3
chr1	21433472	21433492	X	X		"Intron (uc001bec.3/8672, intron 1 of 31)"	1	21132785	21437876	305092	2	8672	uc001bec.3	4384	ENSG00000075151	EIF4G3	eukaryotic translation initiation factor 4 gamma 3
chr1	21503412	21503561		X		Promoter (<=1kb)	1	21132785	21503381	370597	2	8672	uc001bef.3	-31	ENSG00000075151	EIF4G3	eukaryotic translation initiation factor 4 gamma 3
chr1	21568427	21568576			X	"Intron (uc001bej.2/1889, intron 8 of 16)"	1	21543740	21606183	62444	2	1889	uc001bej.2	37607	ENSG00000117298	ECE1	endothelin converting enzyme 1
chr1	21629185	21629331		X	X	"Intron (uc001bem.2/1889, intron 1 of 18)"	1	21619783	21626362	6580	1	100506801	uc001beo.2	9402	ENSG00000231105	LOC100506801	uncharacterized LOC100506801
chr1	21647726	21647848		X	X	"Intron (uc001bem.2/1889, intron 1 of 18)"	1	21543740	21672034	128295	2	1889	uc001bem.2	24186	ENSG00000117298	ECE1	endothelin converting enzyme 1
chr1	21754785	21754934			X	Distal Intergenic	1	21766583	21811393	44811	1	84224	uc001ber.4	-11649	ENSG00000142794	NBPF3	NBPF member 3
chr1	21818466	21818615			X	Distal Intergenic	1	21835858	21904905	69048	1	249	uc001bet.3	-17243	ENSG00000162551	ALPL	"alkaline phosphatase, liver/bone/kidney"
chr1	21835635	21835784		X		Promoter (<=1kb)	1	21835858	21904905	69048	1	249	uc001bet.3	-74	ENSG00000162551	ALPL	"alkaline phosphatase, liver/bone/kidney"
chr1	21895402	21895551		X		"Intron (uc001bet.3/249, intron 7 of 11)"	1	21877772	21904905	27134	1	249	uc001beu.4	17630	ENSG00000162551	ALPL	"alkaline phosphatase, liver/bone/kidney"
chr1	21901317	21901466		X		"Intron (uc001bet.3/249, intron 9 of 11)"	1	21877772	21904905	27134	1	249	uc001beu.4	23545	ENSG00000162551	ALPL	"alkaline phosphatase, liver/bone/kidney"
chr1	21948960	21949109			X	Promoter (<=1kb)	1	21943799	21949011	5213	2	5909	uc001bez.1	0	ENSG00000076864	RAP1GAP	RAP1 GTPase activating protein
chr1	21958801	21958950		X		Promoter (9-10kb)	1	21943799	21949011	5213	2	5909	uc001bez.1	-9790	ENSG00000076864	RAP1GAP	RAP1 GTPase activating protein
chr1	21966184	21966333		X		"Intron (uc001bew.3/5909, intron 2 of 24)"	1	21922708	21978348	55641	2	5909	uc001bew.3	12015	ENSG00000076864	RAP1GAP	RAP1 GTPase activating protein
chr1	22109655	22109804		X		Promoter (<=1kb)	1	22004792	22109688	104897	2	84196	uc001bfb.3	0	ENSG00000090686	USP48	ubiquitin specific peptidase 48
chr1	22110113	22110262		X		Promoter (<=1kb)	1	22054339	22109688	55350	2	84196	uc001bff.3	-425	ENSG00000090686	USP48	ubiquitin specific peptidase 48
chr1	22249247	22249382		X	X	"Intron (uc001bfj.3/3339, intron 1 of 96)"	1	22148737	22263750	115014	2	3339	uc001bfj.3	14368	ENSG00000142798	HSPG2	heparan sulfate proteoglycan 2
chr1	22301329	22301477	X	X	X	Promoter (1-2kb)	1	22303418	22315847	12430	1	23436	uc001bfk.3	-1941	ENSG00000219073	CELA3B	chymotrypsin like elastase family member 3B
chr1	22301478	22301478	X	X		Promoter (1-2kb)	1	22303418	22315847	12430	1	23436	uc001bfk.3	-1940	ENSG00000219073	CELA3B	chymotrypsin like elastase family member 3B
chr1	22352355	22352504		X		Promoter (<=1kb)	1	22352042	22357715	5674	1	29092	uc001bfn.4	313	ENSG00000218510	LINC00339	long intergenic non-protein coding RNA 339
chr1	22358082	22358231	X	X		Distal Intergenic	1	22352042	22357715	5674	1	29092	uc001bfn.4	6040	ENSG00000218510	LINC00339	long intergenic non-protein coding RNA 339
chr1	22379691	22379840		X		Promoter (<=1kb)	1	22379120	22419436	40317	1	998	uc010ods.2	571	ENSG00000070831	CDC42	cell division cycle 42
chr1	22481298	22481441		X	X	Distal Intergenic	1	22443798	22470385	26588	2	54361	uc010odt.2	-10913	ENSG00000162552	WNT4	Wnt family member 4
chr1	22511632	22511781			X	Distal Intergenic	1	22443798	22470385	26588	2	54361	uc010odt.2	-41247	ENSG00000162552	WNT4	Wnt family member 4
chr1	22589220	22589366		X	X	Distal Intergenic	1	22443798	22470385	26588	2	54361	uc010odt.2	-118835	ENSG00000162552	WNT4	Wnt family member 4
chr1	22652788	22652937			X	Distal Intergenic	1	22778344	22857650	79307	1	9923	uc001bft.2	-125407	ENSG00000184677	ZBTB40	zinc finger and BTB domain containing 40
chr1	22668611	22668703	X	X	X	Distal Intergenic	1	22778344	22857650	79307	1	9923	uc001bft.2	-109641	ENSG00000184677	ZBTB40	zinc finger and BTB domain containing 40
chr1	22668704	22668760	X	X		Distal Intergenic	1	22778344	22857650	79307	1	9923	uc001bft.2	-109584	ENSG00000184677	ZBTB40	zinc finger and BTB domain containing 40
chr1	22675020	22675169			X	Distal Intergenic	1	22778344	22857650	79307	1	9923	uc001bft.2	-103175	ENSG00000184677	ZBTB40	zinc finger and BTB domain containing 40
chr1	22690029	22690178	X	X		Distal Intergenic	1	22778344	22857650	79307	1	9923	uc001bft.2	-88166	ENSG00000184677	ZBTB40	zinc finger and BTB domain containing 40
chr1	22740784	22740926	X		X	Distal Intergenic	1	22778344	22857650	79307	1	9923	uc001bft.2	-37418	ENSG00000184677	ZBTB40	zinc finger and BTB domain containing 40
chr1	22769937	22770081		X	X	Promoter (8-9kb)	1	22778344	22857650	79307	1	9923	uc001bft.2	-8263	ENSG00000184677	ZBTB40	zinc finger and BTB domain containing 40
chr1	23036840	23036974		X	X	Promoter (<=1kb)	1	23037331	23241082	203752	1	2048	uc009vqj.1	-357	ENSG00000133216	EPHB2	EPH receptor B2
chr1	23043622	23043771			X	Promoter (2-3kb)	1	23046010	23046091	82	1	100616391	uc021oib.1	-2239	ENSG00000265422	MIR4684	microRNA 4684
chr1	23067786	23067914		X	X	"Intron (uc009vqj.1/2048, intron 1 of 16)"	1	23046010	23046091	82	1	100616391	uc021oib.1	21776	ENSG00000265422	MIR4684	microRNA 4684
chr1	23072301	23072450	X	X	X	"Intron (uc009vqj.1/2048, intron 1 of 16)"	1	23046010	23046091	82	1	100616391	uc021oib.1	26291	ENSG00000265422	MIR4684	microRNA 4684
chr1	23073154	23073207		X	X	"Intron (uc009vqj.1/2048, intron 1 of 16)"	1	23046010	23046091	82	1	100616391	uc021oib.1	27144	ENSG00000265422	MIR4684	microRNA 4684
chr1	23077842	23077990		X	X	"Intron (uc009vqj.1/2048, intron 1 of 16)"	1	23046010	23046091	82	1	100616391	uc021oib.1	31832	ENSG00000265422	MIR4684	microRNA 4684
chr1	23154260	23154394		X	X	"Intron (uc009vqj.1/2048, intron 3 of 16)"	1	23189652	23189719	68	2	100422914	uc021oic.1	35325	ENSG00000264014	MIR4253	microRNA 4253
chr1	23575068	23575216		X	X	Distal Intergenic	1	23518388	23521222	2835	2	3352	uc001bgn.3	-53846	ENSG00000179546	HTR1D	5-hydroxytryptamine receptor 1D
chr1	23670911	23671060		X		Promoter (<=1kb)	1	23636276	23670853	34578	2	10236	uc010odx.2	-58	ENSG00000125944	HNRNPR	heterogeneous nuclear ribonucleoprotein R
chr1	23750246	23750395		X		Promoter (<=1kb)	1	23707555	23751261	43707	2	6920	uc021oig.1	866	ENSG00000204219	TCEA3	transcription elongation factor A3
chr1	23751167	23751316			X	Promoter (<=1kb)	1	23707555	23751261	43707	2	6920	uc021oig.1	0	ENSG00000204219	TCEA3	transcription elongation factor A3
chr1	23881550	23881699		X		Downstream (2-3kb)	1	23884421	23886285	1865	2	3399	uc001bhh.4	4586	ENSG00000117318	ID3	"inhibitor of DNA binding 3, HLH protein"
chr1	23886001	23886150		X		Promoter (<=1kb)	1	23884421	23886285	1865	2	3399	uc001bhh.4	135	ENSG00000117318	ID3	"inhibitor of DNA binding 3, HLH protein"
chr1	23946309	23946458			X	Promoter (6-7kb)	1	23953226	23967056	13831	1	259283	uc001bhj.3	-6768	ENSG00000197880	MDS2	myelodysplastic syndrome 2 translocation associated
chr1	23956449	23956598			X	"Intron (uc001bhi.3/259283, intron 5 of 6)"	1	23953226	23967056	13831	1	259283	uc001bhj.3	3223	ENSG00000197880	MDS2	myelodysplastic syndrome 2 translocation associated
chr1	24069529	24069678			X	Promoter (<=1kb)	1	24069856	24088549	18694	1	6924	uc001bho.3	-178	ENSG00000011007	ELOA	elongin A
chr1	24104708	24104857		X		Promoter (<=1kb)	1	24086872	24104787	17916	2	100506963	uc001bhp.2	0	ENSG00000236810	ELOA-AS1	ELOA antisense RNA 1
chr1	24229428	24229577	X			"Intron (uc001bif.3/1269, intron 1 of 1)"	1	24200460	24239817	39358	2	1269	uc001bif.3	10240	ENSG00000188822	CNR2	cannabinoid receptor 2
chr1	24513762	24513911		X		Promoter (<=1kb)	1	24480647	24513765	33119	2	163702	uc001bir.3	0	ENSG00000185436	IFNLR1	interferon lambda receptor 1
chr1	24648228	24648337		X	X	Promoter (1-2kb)	1	24649530	24681808	32279	1	57822	uc001biy.3	-1193	ENSG00000158055	GRHL3	grainyhead like transcription factor 3
chr1	24648727	24648872		X	X	Promoter (<=1kb)	1	24649530	24681808	32279	1	57822	uc001biy.3	-658	ENSG00000158055	GRHL3	grainyhead like transcription factor 3
chr1	24716077	24716226			X	Promoter (1-2kb)	1	24695211	24718169	22959	2	90529	uc001bjf.3	1943	ENSG00000001460	STPG1	sperm tail PG-rich repeat containing 1
chr1	24829264	24829413			X	Promoter (<=1kb)	1	24829387	24863510	34124	1	11123	uc001bjj.3	0	ENSG00000117602	RCAN3	RCAN family member 3
chr1	25020967	25021116	X	X		Distal Intergenic	1	24975350	24993416	18067	1	10250	uc010oem.1	45617	ENSG00000133226	SRRM1	serine and arginine repetitive matrix 1
chr1	25022984	25023128	X	X	X	Distal Intergenic	1	24975350	24993416	18067	1	10250	uc010oem.1	47634	ENSG00000133226	SRRM1	serine and arginine repetitive matrix 1
chr1	25023129	25023133	X	X		Distal Intergenic	1	24975350	24993416	18067	1	10250	uc010oem.1	47779	ENSG00000133226	SRRM1	serine and arginine repetitive matrix 1
chr1	25031094	25031221		X	X	Distal Intergenic	1	25071760	25170815	99056	1	25932	uc001bjo.2	-40539	ENSG00000169504	CLIC4	chloride intracellular channel 4
chr1	25040370	25040498		X	X	Distal Intergenic	1	25071760	25170815	99056	1	25932	uc001bjo.2	-31262	ENSG00000169504	CLIC4	chloride intracellular channel 4
chr1	25051897	25052046		X		Distal Intergenic	1	25071760	25170815	99056	1	25932	uc001bjo.2	-19714	ENSG00000169504	CLIC4	chloride intracellular channel 4
chr1	25071587	25071736		X		Promoter (<=1kb)	1	25071760	25170815	99056	1	25932	uc001bjo.2	-24	ENSG00000169504	CLIC4	chloride intracellular channel 4
chr1	25174569	25174718		X		Distal Intergenic	1	25226002	25256770	30769	2	864	uc001bjq.3	82052	ENSG00000020633	RUNX3	runt related transcription factor 3
chr1	25240954	25241101		X	X	"Intron (uc001bjq.3/864, intron 3 of 4)"	1	25226002	25256770	30769	2	864	uc001bjq.3	15669	ENSG00000020633	RUNX3	runt related transcription factor 3
chr1	25256788	25256937		X		Promoter (<=1kb)	1	25226002	25256770	30769	2	864	uc010oen.2	-18	ENSG00000020633	RUNX3	runt related transcription factor 3
chr1	25311688	25311837		X		Distal Intergenic	1	25256078	25291612	35535	2	864	uc009vrl.1	-20076	ENSG00000020633	RUNX3	runt related transcription factor 3
chr1	25349477	25349626		X		Distal Intergenic	1	25256078	25291612	35535	2	864	uc009vrl.1	-57865	ENSG00000020633	RUNX3	runt related transcription factor 3
chr1	25574010	25574159		X		Promoter (<=1kb)	1	25568740	25573985	5246	2	57035	uc021oji.1	-25	ENSG00000117616	RSRP1	arginine and serine rich protein 1
chr1	25664804	25664953		X		Promoter (<=1kb)	1	25664789	25688852	24064	1	23585	uc010oeq.2	15	ENSG00000183726	TMEM50A	transmembrane protein 50A
chr1	25833575	25833712		X	X	Distal Intergenic	1	25870076	25895377	25302	1	26119	uc001bkl.4	-36364	ENSG00000157978	LDLRAP1	low density lipoprotein receptor adaptor protein 1
chr1	26033911	26034060		X		"Intron (uc001bkm.2/57134, intron 2 of 11)"	1	25943959	26111258	167300	1	57134	uc009vry.1	89952	ENSG00000117643	MAN1C1	mannosidase alpha class 1C member 1
chr1	26054541	26054690		X		"Intron (uc001bkm.2/57134, intron 2 of 11)"	1	26126667	26144713	18047	1	57190	uc021ojk.1	-71977	ENSG00000162430	SELENON	selenoprotein N
chr1	26101666	26101760	X	X	X	"Intron (uc001bkm.2/57134, intron 8 of 11)"	1	26126667	26144713	18047	1	57190	uc021ojk.1	-24907	ENSG00000162430	SELENON	selenoprotein N
chr1	26101761	26101815	X	X		"Intron (uc001bkm.2/57134, intron 8 of 11)"	1	26126667	26144713	18047	1	57190	uc021ojk.1	-24852	ENSG00000162430	SELENON	selenoprotein N
chr1	26106863	26107012		X		"Intron (uc001bkm.2/57134, intron 9 of 11)"	1	26126667	26144713	18047	1	57190	uc021ojk.1	-19655	ENSG00000162430	SELENON	selenoprotein N
chr1	26126467	26126616			X	Promoter (<=1kb)	1	26126667	26144713	18047	1	57190	uc021ojk.1	-51	ENSG00000162430	SELENON	selenoprotein N
chr1	26146374	26146523		X		Promoter (<=1kb)	1	26146397	26159433	13037	1	56181	uc001bkq.4	0	ENSG00000117640	MTFR1L	mitochondrial fission regulator 1 like
chr1	26175110	26175259			X	"Intron (uc001bkw.1/79000, intron 1 of 2)"	1	26160497	26185848	25352	2	79000	uc001bkw.1	10589	ENSG00000127423	AUNIP	aurora kinase A and ninein interacting protein
chr1	26185940	26186080		X	X	Promoter (<=1kb)	1	26160497	26185848	25352	2	79000	uc001bkw.1	-92	ENSG00000127423	AUNIP	aurora kinase A and ninein interacting protein
chr1	26231984	26232133		X		Promoter (<=1kb)	1	26226607	26232644	6038	2	3925	uc001bkz.3	511	ENSG00000117632	STMN1	stathmin 1
chr1	26232809	26232958		X		Promoter (<=1kb)	1	26232853	26232945	93	2	100500808	uc021ojn.1	0	ENSG00000283938	MIR3917	microRNA 3917
chr1	26324636	26324785		X		Promoter (<=1kb)	1	26286258	26324648	38391	2	5051	uc001bld.4	0	ENSG00000158006	PAFAH2	platelet activating factor acetylhydrolase 2
chr1	26339330	26339479			X	Promoter (8-9kb)	1	26348271	26362954	14684	1	2134	uc001blf.3	-8792	ENSG00000158008	EXTL1	exostosin like glycosyltransferase 1
chr1	26361905	26362054		X		3' UTR	1	26364514	26372604	8091	2	7780	uc001blg.1	10550	ENSG00000158014	SLC30A2	solute carrier family 30 member 2
chr1	26392960	26393101	X	X	X	Promoter (1-2kb)	1	26377796	26394125	16330	2	84676	uc001bli.2	1024	ENSG00000158022	TRIM63	tripartite motif containing 63
chr1	26393102	26393109	X	X		Promoter (1-2kb)	1	26377796	26394125	16330	2	84676	uc001bli.2	1016	ENSG00000158022	TRIM63	tripartite motif containing 63
chr1	26393447	26393594		X	X	Promoter (<=1kb)	1	26377796	26394125	16330	2	84676	uc001bli.2	531	ENSG00000158022	TRIM63	tripartite motif containing 63
chr1	26437531	26437680		X		Promoter (<=1kb)	1	26437656	26452039	14384	1	149420	uc010oew.2	0	ENSG00000175087	PDIK1L	PDLIM1 interacting kinase 1 like
chr1	26438123	26438233		X	X	Promoter (<=1kb)	1	26438268	26452039	13772	1	149420	uc001blj.4	-35	ENSG00000175087	PDIK1L	PDLIM1 interacting kinase 1 like
chr1	26452978	26453127		X		Distal Intergenic	1	26438268	26452039	13772	1	149420	uc009vsb.3	14710	ENSG00000175087	PDIK1L	PDLIM1 interacting kinase 1 like
chr1	26481326	26481475		X		Promoter (4-5kb)	1	26485511	26489119	3609	1	79927	uc001blk.3	-4036	ENSG00000197245	FAM110D	family with sequence similarity 110 member D
chr1	26551875	26552024			X	Promoter (8-9kb)	1	26560693	26605298	44606	1	64793	uc001blr.3	-8669	ENSG00000130695	CEP85	centrosomal protein 85
chr1	26705040	26705149		X	X	Promoter (5-6kb)	1	26688125	26699266	11142	2	257101	uc009vsj.1	-5774	ENSG00000176083	ZNF683	zinc finger protein 683
chr1	26736693	26736842		X		Promoter (<=1kb)	1	26737269	26756210	18942	1	79727	uc001bmi.1	-427	ENSG00000131914	LIN28A	lin-28 homolog A
chr1	26737141	26737290		X		Promoter (<=1kb)	1	26737269	26756210	18942	1	79727	uc001bmi.1	0	ENSG00000131914	LIN28A	lin-28 homolog A
chr1	26798850	26798999		X		Promoter (<=1kb)	1	26798902	26803133	4232	1	3151	uc001bmp.4	0	ENSG00000198830	HMGN2	high mobility group nucleosomal binding domain 2
chr1	26856169	26856300		X	X	Promoter (<=1kb)	1	26856249	26901520	45272	1	6195	uc001bmr.1	0	ENSG00000117676	RPS6KA1	ribosomal protein S6 kinase A1
chr1	26947063	26947212		X		Distal Intergenic	1	26881033	26881084	52	1	100302190	uc021ojp.1	66030	ENSG00000238705	MIR1976	microRNA 1976
chr1	27019009	27019158		X		Promoter (3-4kb)	1	27022522	27102198	79677	1	8289	uc001bmt.1	-3364	ENSG00000117713	ARID1A	AT-rich interaction domain 1A
chr1	27049972	27050121		X		Promoter (5-6kb)	1	27055871	27101711	45841	1	8289	uc001bmw.1	-5750	ENSG00000117713	ARID1A	AT-rich interaction domain 1A
chr1	27240675	27240820	X		X	Promoter (<=1kb)	1	27237975	27240567	2593	2	8431	uc001bnf.3	-108	ENSG00000131910	NR0B2	nuclear receptor subfamily 0 group B member 2
chr1	27286885	27287034			X	Promoter (<=1kb)	1	27276047	27286901	10855	2	126695	uc001bni.2	0	ENSG00000175707	KDF1	keratinocyte differentiation factor 1
chr1	27320140	27320289		X		Promoter (<=1kb)	1	27320195	27327377	7183	1	388610	uc001bnj.4	0	ENSG00000253368	TRNP1	TMF1-regulated nuclear protein 1
chr1	27339427	27339576		X		Promoter (<=1kb)	1	27331511	27339333	7823	2	115572	uc010ofj.2	-94	ENSG00000158246	FAM46B	family with sequence similarity 46 member B
chr1	27384574	27384723			X	"Intron (uc021ojq.1/uc021ojq.1, intron 1 of 1)"	1	27331511	27339333	7823	2	115572	uc010ofj.2	-45241	ENSG00000158246	FAM46B	family with sequence similarity 46 member B
chr1	27385567	27385716			X	"Intron (uc021ojq.1/uc021ojq.1, intron 1 of 1)"	1	27425300	27430513	5214	2	6548	uc001bnl.3	44797	ENSG00000090020	SLC9A1	solute carrier family 9 member A1
chr1	27560844	27560993		X		Promoter (<=1kb)	1	27561007	27635124	74118	1	23038	uc001bno.4	-14	ENSG00000142784	WDTC1	WD and tetratricopeptide repeats 1
chr1	27692655	27692804		X		Promoter (<=1kb)	1	27681670	27693337	11668	2	9064	uc001bny.1	533	ENSG00000142733	MAP3K6	mitogen-activated protein kinase kinase kinase 6
chr1	27709783	27709932			X	Promoter (<=1kb)	1	27705596	27709805	4210	2	388611	uc001boc.3	0	ENSG00000174950	CD164L2	CD164 molecule like 2
chr1	27718953	27719102		X		Promoter (<=1kb)	1	27719148	27722317	3170	1	2827	uc001bod.4	-46	ENSG00000181773	GPR3	G protein-coupled receptor 3
chr1	27845842	27845991			X	Distal Intergenic	1	27730734	27816678	85945	2	10163	uc010ofl.2	-29164	ENSG00000158195	WASF2	WAS protein family member 2
chr1	27869525	27869674	X	X		"Intron (uc009vsy.3/27245, intron 6 of 6)"	1	27730734	27816678	85945	2	10163	uc010ofl.2	-52847	ENSG00000158195	WASF2	WAS protein family member 2
chr1	27895062	27895211		X		"Intron (uc009vsy.3/27245, intron 1 of 6)"	1	27860756	27930143	69388	2	27245	uc009vsy.3	34932	ENSG00000126705	AHDC1	AT-hook DNA binding motif containing 1
chr1	27896410	27896559		X		"Intron (uc009vsy.3/27245, intron 1 of 6)"	1	27860756	27930143	69388	2	27245	uc009vsy.3	33584	ENSG00000126705	AHDC1	AT-hook DNA binding motif containing 1
chr1	27901697	27901845		X	X	"Intron (uc009vsy.3/27245, intron 1 of 6)"	1	27860756	27930143	69388	2	27245	uc009vsy.3	28298	ENSG00000126705	AHDC1	AT-hook DNA binding motif containing 1
chr1	27902502	27902651		X		"Intron (uc009vsy.3/27245, intron 1 of 6)"	1	27860756	27930143	69388	2	27245	uc009vsy.3	27492	ENSG00000126705	AHDC1	AT-hook DNA binding motif containing 1
chr1	27930597	27930746		X		Promoter (<=1kb)	1	27877380	27930361	52982	2	27245	uc001boh.1	-236	ENSG00000126705	AHDC1	AT-hook DNA binding motif containing 1
chr1	27941611	27941760			X	Promoter (<=1kb)	1	27938801	27942174	3374	2	2268	uc001boi.3	414	ENSG00000000938	FGR	"FGR proto-oncogene, Src family tyrosine kinase"
chr1	27977350	27977499		X		Distal Intergenic	1	27938801	27961727	22927	2	2268	uc001bom.3	-15623	ENSG00000000938	FGR	"FGR proto-oncogene, Src family tyrosine kinase"
chr1	28052302	28052451		X		Promoter (<=1kb)	1	28052490	28086275	33786	1	199870	uc009vtb.3	-39	ENSG00000009780	FAM76A	family with sequence similarity 76 member A
chr1	28586701	28586850		X		Promoter (<=1kb)	1	28585963	28609002	23040	1	83667	uc001bps.3	738	ENSG00000130766	SESN2	sestrin 2
chr1	28655401	28655550			X	Promoter (<=1kb)	1	28655513	28661861	6349	1	54797	uc021okc.1	0	ENSG00000130772	MED18	mediator complex subunit 18
chr1	28844687	28844836		X		Promoter (<=1kb)	1	28844745	28865708	20964	1	1104	uc001bqe.2	0	ENSG00000180198	RCC1	regulator of chromosome condensation 1
chr1	28908300	28908449		X		Promoter (<=1kb)	1	28905050	28908366	3317	2	85028	uc001bqk.3	0	ENSG00000197989	SNHG12	small nucleolar RNA host gene 12
chr1	28918850	28918999			X	Promoter (<=1kb)	1	28919007	28921088	2082	1	115273	uc001bqv.3	-8	ENSG00000188060	RAB42	"RAB42, member RAS oncogene family"
chr1	28969585	28969734		X		Promoter (<=1kb)	1	28929609	28969604	39996	2	6883	uc001bqx.3	0	ENSG00000120656	TAF12	TATA-box binding protein associated factor 12
chr1	28975088	28975237		X		Promoter (<=1kb)	1	28975112	28975246	135	1	26824	uc009vtj.1	0	ENSG00000274978	RNU11	"RNA, U11 small nuclear"
chr1	28994717	28994864		X	X	Promoter (<=1kb)	1	28995240	29042115	46876	1	10691	uc001bqz.3	-376	ENSG00000162419	GMEB1	glucocorticoid modulatory element binding protein 1
chr1	28995132	28995276		X	X	Promoter (<=1kb)	1	28995240	29042115	46876	1	10691	uc001bqz.3	0	ENSG00000162419	GMEB1	glucocorticoid modulatory element binding protein 1
chr1	29063185	29063334		X		Promoter (<=1kb)	1	29063136	29096287	33152	1	51441	uc010ofx.2	49	ENSG00000198492	YTHDF2	YTH N6-methyladenosine RNA binding protein 2
chr1	29101769	29101918			X	Distal Intergenic	1	29138654	29190208	51555	1	4985	uc001brf.1	-36736	ENSG00000116329	OPRD1	opioid receptor delta 1
chr1	29172622	29172771			X	"Intron (uc001brf.1/4985, intron 1 of 2)"	1	29138654	29190208	51555	1	4985	uc001brf.1	33968	ENSG00000116329	OPRD1	opioid receptor delta 1
chr1	29240868	29241017		X		Promoter (<=1kb)	1	29241088	29380164	139077	1	2035	uc009vtk.2	-71	ENSG00000159023	EPB41	erythrocyte membrane protein band 4.1
chr1	29448747	29448896		X		Promoter (<=1kb)	1	29445937	29449013	3077	2	399474	uc021okh.1	117	ENSG00000253304	TMEM200B	transmembrane protein 200B
chr1	29507988	29508137		X		Promoter (<=1kb)	1	29474250	29508637	34388	2	6429	uc001bro.3	500	ENSG00000116350	SRSF4	serine and arginine rich splicing factor 4
chr1	29508460	29508609		X		Promoter (<=1kb)	1	29474250	29508637	34388	2	6429	uc001bro.3	28	ENSG00000116350	SRSF4	serine and arginine rich splicing factor 4
chr1	29562953	29563102			X	Promoter (<=1kb)	1	29563028	29653325	90298	1	10076	uc001bru.3	0	ENSG00000060656	PTPRU	"protein tyrosine phosphatase, receptor type U"
chr1	29609674	29609823		X		"Intron (uc001bru.3/10076, intron 12 of 30)"	1	29646722	29653325	6604	1	10076	uc001brx.3	-36899	ENSG00000060656	PTPRU	"protein tyrosine phosphatase, receptor type U"
chr1	29624989	29625138			X	"Intron (uc001bru.3/10076, intron 16 of 30)"	1	29646722	29653325	6604	1	10076	uc001brx.3	-21584	ENSG00000060656	PTPRU	"protein tyrosine phosphatase, receptor type U"
chr1	29632646	29632795			X	"Intron (uc001bru.3/10076, intron 19 of 30)"	1	29646722	29653325	6604	1	10076	uc001brx.3	-13927	ENSG00000060656	PTPRU	"protein tyrosine phosphatase, receptor type U"
chr1	29651435	29651554		X	X	"Intron (uc001bru.3/10076, intron 29 of 30)"	1	29646722	29653325	6604	1	10076	uc001brx.3	4713	ENSG00000060656	PTPRU	"protein tyrosine phosphatase, receptor type U"
chr1	29798610	29798725		X	X	Distal Intergenic	1	29646722	29653325	6604	1	10076	uc001brx.3	151888	ENSG00000060656	PTPRU	"protein tyrosine phosphatase, receptor type U"
chr1	29801073	29801191	X	X	X	Distal Intergenic	1	29646722	29653325	6604	1	10076	uc001brx.3	154351	ENSG00000060656	PTPRU	"protein tyrosine phosphatase, receptor type U"
chr1	29801192	29801222	X	X		Distal Intergenic	1	29646722	29653325	6604	1	10076	uc001brx.3	154470	ENSG00000060656	PTPRU	"protein tyrosine phosphatase, receptor type U"
chr1	29825420	29825569	X	X		Distal Intergenic	1	29646722	29653325	6604	1	10076	uc001brx.3	178698	ENSG00000060656	PTPRU	"protein tyrosine phosphatase, receptor type U"
chr1	29876561	29876710	X			Distal Intergenic	1	29646722	29653325	6604	1	10076	uc001brx.3	229839	ENSG00000060656	PTPRU	"protein tyrosine phosphatase, receptor type U"
chr1	30277298	30277435		X	X	Distal Intergenic	1	29646722	29653325	6604	1	10076	uc001brx.3	630576	ENSG00000060656	PTPRU	"protein tyrosine phosphatase, receptor type U"
chr1	30318891	30319033		X	X	Distal Intergenic	1	29646722	29653325	6604	1	10076	uc001brx.3	672169	ENSG00000060656	PTPRU	"protein tyrosine phosphatase, receptor type U"
chr1	30322742	30322890	X	X	X	Distal Intergenic	1	29646722	29653325	6604	1	10076	uc001brx.3	676020	ENSG00000060656	PTPRU	"protein tyrosine phosphatase, receptor type U"
chr1	30322891	30322891	X	X		Distal Intergenic	1	29646722	29653325	6604	1	10076	uc001brx.3	676169	ENSG00000060656	PTPRU	"protein tyrosine phosphatase, receptor type U"
chr1	30497444	30497591		X	X	"Intron (uc001bry.3/uc001bry.3, intron 4 of 6)"	1	31191619	31199593	7975	1	100129196	uc001bsb.1	-694028	ENSG00000186056	MATN1-AS1	MATN1 antisense RNA 1
chr1	30586241	30586347	X	X	X	Distal Intergenic	1	31191619	31199593	7975	1	100129196	uc001bsb.1	-605272	ENSG00000186056	MATN1-AS1	MATN1 antisense RNA 1
chr1	30586348	30586390	X	X		Distal Intergenic	1	31191619	31199593	7975	1	100129196	uc001bsb.1	-605229	ENSG00000186056	MATN1-AS1	MATN1 antisense RNA 1
chr1	30593587	30593736		X	X	Distal Intergenic	1	31191619	31199593	7975	1	100129196	uc001bsb.1	-597883	ENSG00000186056	MATN1-AS1	MATN1 antisense RNA 1
chr1	30601812	30601954		X	X	Distal Intergenic	1	31191619	31199593	7975	1	100129196	uc001bsb.1	-589665	ENSG00000186056	MATN1-AS1	MATN1 antisense RNA 1
chr1	30627015	30627164		X		Distal Intergenic	1	31191619	31199593	7975	1	100129196	uc001bsb.1	-564455	ENSG00000186056	MATN1-AS1	MATN1 antisense RNA 1
chr1	30773668	30773740		X	X	Distal Intergenic	1	31191619	31199593	7975	1	100129196	uc001bsb.1	-417879	ENSG00000186056	MATN1-AS1	MATN1 antisense RNA 1
chr1	30805064	30805123		X	X	Distal Intergenic	1	31191619	31199593	7975	1	100129196	uc001bsb.1	-386496	ENSG00000186056	MATN1-AS1	MATN1 antisense RNA 1
chr1	30880261	30880410			X	Distal Intergenic	1	31191619	31199593	7975	1	100129196	uc001bsb.1	-311209	ENSG00000186056	MATN1-AS1	MATN1 antisense RNA 1
chr1	30885981	30886124	X	X	X	Distal Intergenic	1	31191619	31199593	7975	1	100129196	uc001bsb.1	-305495	ENSG00000186056	MATN1-AS1	MATN1 antisense RNA 1
chr1	30886125	30886130	X	X		Distal Intergenic	1	31191619	31199593	7975	1	100129196	uc001bsb.1	-305489	ENSG00000186056	MATN1-AS1	MATN1 antisense RNA 1
chr1	31158326	31158475		X		Distal Intergenic	1	31191619	31199593	7975	1	100129196	uc001bsb.1	-33144	ENSG00000186056	MATN1-AS1	MATN1 antisense RNA 1
chr1	31229504	31229653		X		Promoter (1-2kb)	1	31205315	31230683	25369	2	7805	uc001bsc.2	1030	ENSG00000162511	LAPTM5	lysosomal protein transmembrane 5
chr1	31310629	31310765		X	X	Distal Intergenic	1	31342313	31351587	9275	2	9672	uc001bsd.2	40822	ENSG00000162512	SDC3	syndecan 3
chr1	31538584	31538733		X		Promoter (<=1kb)	1	31404353	31538564	134212	2	9698	uc010oga.1	-20	ENSG00000134644	PUM1	pumilio RNA binding family member 1
chr1	31627657	31627806		X		Distal Intergenic	1	31652592	31661034	8443	2	79570	uc010ogc.2	33228	ENSG00000084628	NKAIN1	sodium/potassium transporting ATPase interacting 1
chr1	31628203	31628352		X		Distal Intergenic	1	31652592	31661034	8443	2	79570	uc010ogc.2	32682	ENSG00000084628	NKAIN1	sodium/potassium transporting ATPase interacting 1
chr1	31643736	31643885		X		Distal Intergenic	1	31652592	31661034	8443	2	79570	uc010ogc.2	17149	ENSG00000084628	NKAIN1	sodium/potassium transporting ATPase interacting 1
chr1	31645167	31645316	X	X		Distal Intergenic	1	31652592	31661034	8443	2	79570	uc010ogc.2	15718	ENSG00000084628	NKAIN1	sodium/potassium transporting ATPase interacting 1
chr1	31747909	31748056	X	X	X	Promoter (5-6kb)	1	31732415	31742513	10099	2	9410	uc009vtt.3	-5396	ENSG00000060688	SNRNP40	small nuclear ribonucleoprotein U5 subunit 40
chr1	31748057	31748058	X	X		Promoter (5-6kb)	1	31732415	31742513	10099	2	9410	uc009vtt.3	-5544	ENSG00000060688	SNRNP40	small nuclear ribonucleoprotein U5 subunit 40
chr1	31885986	31886135			X	Promoter (<=1kb)	1	31885963	31907527	21565	1	347735	uc001bst.3	23	ENSG00000168528	SERINC2	serine incorporator 2
chr1	32121636	32121638	X	X		"Intron (uc001btj.1/1307, intron 60 of 64)"	1	32099887	32110838	10952	2	553115	uc010ogm.2	-10798	ENSG00000162517	PEF1	penta-EF-hand domain containing 1
chr1	32121639	32121785	X	X	X	"Intron (uc001btj.1/1307, intron 60 of 64)"	1	32099887	32110838	10952	2	553115	uc010ogm.2	-10801	ENSG00000162517	PEF1	penta-EF-hand domain containing 1
chr1	32212539	32212686		X	X	Promoter (2-3kb)	1	32192718	32210332	17615	2	576	uc010ogo.2	-2207	ENSG00000121753	ADGRB2	adhesion G protein-coupled receptor B2
chr1	32235791	32235940		X		Promoter (6-7kb)	1	32192718	32229648	36931	2	576	uc001bto.3	-6143	ENSG00000121753	ADGRB2	adhesion G protein-coupled receptor B2
chr1	32241876	32242023		X	X	Distal Intergenic	1	32192718	32229648	36931	2	576	uc001bto.3	-12228	ENSG00000121753	ADGRB2	adhesion G protein-coupled receptor B2
chr1	32338548	32338697		X		Distal Intergenic	1	32372022	32385259	13238	2	8073	uc001btx.2	46562	ENSG00000184007	PTP4A2	"protein tyrosine phosphatase type IVA, member 2"
chr1	32410096	32410245		X		Promoter (6-7kb)	1	32372022	32403988	31967	2	8073	uc001bty.2	-6108	ENSG00000184007	PTP4A2	"protein tyrosine phosphatase type IVA, member 2"
chr1	32420682	32420782		X	X	Distal Intergenic	1	32372022	32403988	31967	2	8073	uc001bty.2	-16694	ENSG00000184007	PTP4A2	"protein tyrosine phosphatase type IVA, member 2"
chr1	32538707	32538856		X		Promoter (<=1kb)	1	32538503	32568467	29965	1	55116	uc010ogw.2	204	ENSG00000121775	TMEM39B	transmembrane protein 39B
chr1	32615599	32615748	X	X		"Intron (uc001bug.3/23633, intron 1 of 13)"	1	32608580	32642168	33589	1	23633	uc010ogy.2	7019	ENSG00000025800	KPNA6	karyopherin subunit alpha 6
chr1	32645214	32645363		X		Promoter (<=1kb)	1	32645345	32663886	18542	1	200081	uc001bui.3	0	ENSG00000084652	TXLNA	taxilin alpha
chr1	32705936	32706085		X		Promoter (<=1kb)	1	32697261	32706265	9005	2	339483	uc001but.3	180	NA	MTMR9LP	"myotubularin related protein 9-like, pseudogene"
chr1	32757507	32757656		X		Promoter (<=1kb)	1	32757708	32793590	35883	1	3065	uc010ohd.1	-52	ENSG00000116478	HDAC1	histone deacetylase 1
chr1	32787438	32787587			X	Promoter (7-8kb)	1	32795081	32799224	4144	1	3065	uc001bvc.1	-7494	ENSG00000116478	HDAC1	histone deacetylase 1
chr1	32801610	32801759			X	Promoter (<=1kb)	1	32799430	32801840	2411	2	65108	uc001bvd.4	81	ENSG00000175130	MARCKSL1	MARCKS like 1
chr1	32801810	32801959		X		Promoter (<=1kb)	1	32799430	32801840	2411	2	65108	uc001bvd.4	0	ENSG00000175130	MARCKSL1	MARCKS like 1
chr1	32817142	32817289		X	X	Distal Intergenic	1	32826871	32827844	974	2	100128071	uc021oku.1	10555	ENSG00000225828	FAM229A	family with sequence similarity 229 member A
chr1	32827655	32827804			X	Promoter (<=1kb)	1	32826871	32827844	974	2	100128071	uc021oku.1	40	ENSG00000225828	FAM229A	family with sequence similarity 229 member A
chr1	32860120	32860269		X		Promoter (<=1kb)	1	32830776	32860062	29287	2	55108	uc001bvj.3	-58	ENSG00000160058	BSDC1	BSD domain containing 1
chr1	32903908	32904057	X	X		Distal Intergenic	1	32930658	33071542	140885	1	653121	uc001bvk.3	-26601	ENSG00000160062	ZBTB8A	zinc finger and BTB domain containing 8A
chr1	32912149	32912298	X	X		Distal Intergenic	1	32930658	33071542	140885	1	653121	uc001bvk.3	-18360	ENSG00000160062	ZBTB8A	zinc finger and BTB domain containing 8A
chr1	32920458	32920588		X	X	Distal Intergenic	1	32930658	33071542	140885	1	653121	uc001bvk.3	-10070	ENSG00000160062	ZBTB8A	zinc finger and BTB domain containing 8A
chr1	32992777	32992926		X		"Intron (uc001bvk.3/653121, intron 4 of 9)"	1	33004772	33066226	61455	1	653121	uc001bvm.3	-11846	ENSG00000160062	ZBTB8A	zinc finger and BTB domain containing 8A
chr1	33006336	33006437		X	X	Promoter (1-2kb)	1	33004772	33071542	66771	1	653121	uc001bvn.3	1564	ENSG00000160062	ZBTB8A	zinc finger and BTB domain containing 8A
chr1	33077853	33078002			X	"Intron (uc001bvo.1/339487, intron 1 of 1)"	1	33065773	33116185	50413	2	339487	uc001bvo.1	38183	ENSG00000176261	ZBTB8OS	zinc finger and BTB domain containing 8 opposite strand
chr1	33197082	33197210		X	X	Distal Intergenic	1	33207512	33240571	33060	1	57648	uc001bvu.1	-10302	ENSG00000162522	KIAA1522	KIAA1522
chr1	33207418	33207567		X		Promoter (<=1kb)	1	33207512	33240571	33060	1	57648	uc001bvu.1	0	ENSG00000162522	KIAA1522	KIAA1522
chr1	33207753	33207902		X		Promoter (<=1kb)	1	33207512	33240571	33060	1	57648	uc001bvu.1	241	ENSG00000162522	KIAA1522	KIAA1522
chr1	33219746	33219894		X	X	Promoter (<=1kb)	1	33219687	33240571	20885	1	57648	uc010ohm.1	59	ENSG00000162522	KIAA1522	KIAA1522
chr1	33236865	33236979		X	X	"Exon (uc001bvu.1/57648, exon 6 of 7)"	1	33231235	33240571	9337	1	57648	uc010ohn.1	5630	ENSG00000162522	KIAA1522	KIAA1522
chr1	33283643	33283792		X		Promoter (<=1kb)	1	33240840	33283633	42794	2	8565	uc001bvy.1	-10	ENSG00000134684	YARS	tyrosyl-tRNA synthetase
chr1	33358965	33359114		X		"Intron (uc001bwh.3/3208, intron 2 of 3)"	1	33352098	33360247	8150	1	3208	uc001bwh.3	6867	ENSG00000121905	HPCA	hippocalcin
chr1	33367025	33367160		X	X	Promoter (<=1kb)	1	33360196	33366953	6758	2	113452	uc001bwk.1	-72	ENSG00000121900	TMEM54	transmembrane protein 54
chr1	33373142	33373291	X	X		Promoter (6-7kb)	1	33360196	33366953	6758	2	113452	uc001bwk.1	-6189	ENSG00000121900	TMEM54	transmembrane protein 54
chr1	33399738	33399887	X	X		Downstream (2-3kb)	1	33402050	33430286	28237	2	127544	uc001bwm.4	30399	ENSG00000116514	RNF19B	ring finger protein 19B
chr1	33413340	33413489	X	X		"Intron (uc001bwm.4/127544, intron 3 of 8)"	1	33402050	33430286	28237	2	127544	uc001bwm.4	16797	ENSG00000116514	RNF19B	ring finger protein 19B
chr1	33471826	33471975			X	"Intron (uc001bwn.3/uc001bwn.3, intron 1 of 1)"	1	33473541	33502512	28972	2	204	uc001bwo.2	30537	ENSG00000004455	AK2	adenylate kinase 2
chr1	33713923	33714072	X	X		Promoter (8-9kb)	1	33722174	33766320	44147	1	149076	uc001bxc.1	-8102	ENSG00000160094	ZNF362	zinc finger protein 362
chr1	33721676	33721825			X	Promoter (<=1kb)	1	33722174	33766320	44147	1	149076	uc001bxc.1	-349	ENSG00000160094	ZNF362	zinc finger protein 362
chr1	33815089	33815238			X	Promoter (<=1kb)	1	33789224	33815499	26276	2	1912	uc001bxe.1	261	ENSG00000134686	PHC2	polyhomeotic homolog 2
chr1	33982068	33982217			X	3' UTR	1	33938252	33961995	23744	1	7579	uc009vui.3	43816	ENSG00000121903	ZSCAN20	zinc finger and SCAN domain containing 20
chr1	34185018	34185167	X	X		Promoter (9-10kb)	1	34057407	34175104	117698	2	114784	uc001bxo.1	-9914	ENSG00000121904	CSMD2	CUB and Sushi multiple domains 2
chr1	34327763	34327764	X	X		Promoter (1-2kb)	1	34326076	34330392	4317	1	127540	uc001bxp.3	1687	ENSG00000176256	HMGB4	high mobility group box 4
chr1	34327765	34327912	X	X	X	Promoter (1-2kb)	1	34326076	34330392	4317	1	127540	uc001bxp.3	1689	ENSG00000176256	HMGB4	high mobility group box 4
chr1	34368476	34368625		X		"Intron (uc001bxm.1/114784, intron 5 of 70)"	1	34334557	34351059	16503	1	402779	uc001bxr.3	33919	ENSG00000231163	CSMD2-AS1	CSMD2 antisense RNA 1
chr1	34485556	34485558	X	X		"Intron (uc001bxm.1/114784, intron 3 of 70)"	1	33979609	34630875	651267	2	114784	uc001bxm.1	145317	ENSG00000121904	CSMD2	CUB and Sushi multiple domains 2
chr1	34485559	34485705	X	X	X	"Intron (uc001bxm.1/114784, intron 3 of 70)"	1	33979609	34630875	651267	2	114784	uc001bxm.1	145170	ENSG00000121904	CSMD2	CUB and Sushi multiple domains 2
chr1	34520600	34520749			X	"Intron (uc001bxm.1/114784, intron 2 of 70)"	1	33979609	34630875	651267	2	114784	uc001bxm.1	110126	ENSG00000121904	CSMD2	CUB and Sushi multiple domains 2
chr1	35239731	35239880	X	X		Promoter (6-7kb)	1	35246790	35251967	5178	1	2707	uc001bxx.3	-6910	ENSG00000188910	GJB3	gap junction protein beta 3
chr1	35258532	35258681			X	Promoter (<=1kb)	1	35258599	35261348	2750	1	2701	uc001bya.3	0	ENSG00000187513	GJA4	gap junction protein alpha 4
chr1	35309972	35310120		X	X	Distal Intergenic	1	35315963	35324646	8684	2	113444	uc021olc.1	14526	ENSG00000163866	SMIM12	small integral membrane protein 12
chr1	35497261	35497410		X		Promoter (<=1kb)	1	35449368	35497291	47924	2	9204	uc001byf.1	0	ENSG00000163867	ZMYM6	zinc finger MYM-type containing 6
chr1	35550675	35550824	X			"Intron (uc001byl.1/79830, intron 1 of 3)"	1	35544972	35581455	36484	1	79830	uc010ohu.2	5703	ENSG00000197056	ZMYM1	zinc finger MYM-type containing 1
chr1	35658768	35658917		X		Promoter (<=1kb)	1	35649201	35658743	9543	2	6421	uc001bys.3	-25	ENSG00000116560	SFPQ	splicing factor proline and glutamine rich
chr1	35856864	35857012		X	X	"Intron (uc001byt.3/9202, intron 15 of 29)"	1	35824526	35887545	63020	1	9202	uc009vuv.3	32338	ENSG00000146463	ZMYM4	zinc finger MYM-type containing 4
chr1	35891871	35891871	X	X		Distal Intergenic	1	35899091	35920237	21147	2	79932	uc001byw.3	28366	ENSG00000142687	KIAA0319L	KIAA0319 like
chr1	35891872	35892020	X	X	X	Distal Intergenic	1	35899091	35920237	21147	2	79932	uc001byw.3	28217	ENSG00000142687	KIAA0319L	KIAA0319 like
chr1	35965469	35965615		X	X	"Intron (uc001byx.3/79932, intron 3 of 20)"	1	35904143	35936561	32419	2	79932	uc010ohv.1	-28908	ENSG00000142687	KIAA0319L	KIAA0319 like
chr1	35999338	35999487		X		"Intron (uc001byx.3/79932, intron 2 of 20)"	1	35932209	36023003	90795	2	79932	uc010ohx.1	23516	ENSG00000142687	KIAA0319L	KIAA0319 like
chr1	36165587	36165736			X	Distal Intergenic	1	36179477	36184790	5314	2	127703	uc001bzh.1	19054	ENSG00000142686	C1orf216	chromosome 1 open reading frame 216
chr1	36235588	36235737		X		Promoter (<=1kb)	1	36197713	36235551	37839	2	63967	uc009vux.3	-37	ENSG00000092853	CLSPN	claspin
chr1	36273579	36273728			X	Promoter (<=1kb)	1	36273828	36323490	49663	1	192670	uc001bzj.2	-100	ENSG00000134698	AGO4	"argonaute 4, RISC catalytic component"
chr1	36349461	36349610		X		Promoter (<=1kb)	1	36348810	36389899	41090	1	26523	uc001bzl.3	651	ENSG00000092847	AGO1	"argonaute 1, RISC catalytic component"
chr1	36615144	36615293		X		Promoter (<=1kb)	1	36602170	36615115	12946	2	27095	uc031plw.1	-29	ENSG00000054116	TRAPPC3	trafficking protein particle complex 3
chr1	36621656	36621805			X	Promoter (<=1kb)	1	36621803	36646441	24639	1	55700	uc001bzz.3	0	ENSG00000116871	MAP7D1	MAP7 domain containing 1
chr1	36689869	36690018		X		Promoter (<=1kb)	1	36690017	36770957	80941	1	9967	uc001cae.4	0	ENSG00000054118	THRAP3	thyroid hormone receptor associated protein 3
chr1	36771859	36772008		X		Promoter (<=1kb)	1	36771994	36787379	15386	1	79729	uc010oia.1	0	ENSG00000214193	SH3D21	SH3 domain containing 21
chr1	36772545	36772694		X		Promoter (<=1kb)	1	36772708	36787379	14672	1	79729	uc010oib.1	-14	ENSG00000214193	SH3D21	SH3 domain containing 21
chr1	36851623	36851772		X		Promoter (<=1kb)	1	36805225	36851485	46261	2	83931	uc001cam.1	-138	ENSG00000196182	STK40	serine/threonine kinase 40
chr1	36877581	36877730		X		Distal Intergenic	1	36859031	36863493	4463	2	84967	uc001cao.1	-14088	ENSG00000181817	LSM10	"LSM10, U7 small nuclear RNA associated"
chr1	36947501	36947650		X		Promoter (1-2kb)	1	36931644	36948915	17272	2	1441	uc001cav.2	1265	ENSG00000119535	CSF3R	colony stimulating factor 3 receptor
chr1	36958241	36958357	X	X	X	Promoter (9-10kb)	1	36931644	36948915	17272	2	1441	uc001cax.2	-9326	ENSG00000119535	CSF3R	colony stimulating factor 3 receptor
chr1	36958358	36958390	X	X		Promoter (9-10kb)	1	36931644	36948915	17272	2	1441	uc001cax.2	-9443	ENSG00000119535	CSF3R	colony stimulating factor 3 receptor
chr1	36986716	36986865			X	Distal Intergenic	1	36931644	36948915	17272	2	1441	uc001cax.2	-37801	ENSG00000119535	CSF3R	colony stimulating factor 3 receptor
chr1	37088965	37089114		X		Distal Intergenic	1	36931644	36948915	17272	2	1441	uc001cax.2	-140050	ENSG00000119535	CSF3R	colony stimulating factor 3 receptor
chr1	37223406	37223555		X		Distal Intergenic	1	36931644	36948915	17272	2	1441	uc001cax.2	-274491	ENSG00000119535	CSF3R	colony stimulating factor 3 receptor
chr1	37224073	37224222		X		Distal Intergenic	1	36931644	36948915	17272	2	1441	uc001cax.2	-275158	ENSG00000119535	CSF3R	colony stimulating factor 3 receptor
chr1	37237339	37237488			X	Distal Intergenic	1	37261128	37499844	238717	2	2899	uc001caz.2	262356	ENSG00000163873	GRIK3	glutamate ionotropic receptor kainate type subunit 3
chr1	37244912	37245028		X	X	Distal Intergenic	1	37261128	37499844	238717	2	2899	uc001caz.2	254816	ENSG00000163873	GRIK3	glutamate ionotropic receptor kainate type subunit 3
chr1	37256001	37256150			X	Distal Intergenic	1	37261128	37499844	238717	2	2899	uc001caz.2	243694	ENSG00000163873	GRIK3	glutamate ionotropic receptor kainate type subunit 3
chr1	37375621	37375770			X	"Intron (uc001caz.2/2899, intron 1 of 15)"	1	37261128	37499844	238717	2	2899	uc001caz.2	124074	ENSG00000163873	GRIK3	glutamate ionotropic receptor kainate type subunit 3
chr1	37538980	37539127		X	X	Distal Intergenic	1	37270219	37499844	229626	2	2899	uc001cba.1	-39136	ENSG00000163873	GRIK3	glutamate ionotropic receptor kainate type subunit 3
chr1	37651962	37652111		X		Distal Intergenic	1	37627164	37627235	72	1	100422898	uc021oll.1	24798	ENSG00000264698	MIR4255	microRNA 4255
chr1	37940036	37940185		X		Promoter (<=1kb)	1	37920480	37940044	19565	2	728431	uc021olm.1	0	ENSG00000233621	LINC01137	long intergenic non-protein coding RNA 1137
chr1	38157936	38158085		X		Promoter (<=1kb)	1	38158073	38175391	17319	1	55143	uc001cbr.4	0	ENSG00000134690	CDCA8	cell division cycle associated 8
chr1	38201115	38201264			X	Promoter (3-4kb)	1	38179553	38197254	17702	2	284656	uc009vvh.2	-3861	ENSG00000183317	EPHA10	EPH receptor A10
chr1	38230823	38230925		X	X	Promoter (<=1kb)	1	38181646	38230824	49179	2	284656	uc009vvi.3	0	ENSG00000183317	EPHA10	EPH receptor A10
chr1	38273880	38274029		X		Promoter (<=1kb)	1	38268614	38273865	5252	2	79693	uc001cca.1	-15	ENSG00000196449	YRDC	yrdC N6-threonylcarbamoyltransferase domain containing
chr1	38461712	38461861			X	Promoter (5-6kb)	1	38422652	38455761	33110	2	10946	uc010oik.2	-5951	ENSG00000183431	SF3A3	splicing factor 3a subunit 3
chr1	38471279	38471428		X		Promoter (<=1kb)	1	38462442	38471187	8746	2	2275	uc001ccm.3	-92	ENSG00000183386	FHL3	four and a half LIM domains 3
chr1	38496055	38496111	X	X		Distal Intergenic	1	38509523	38512450	2928	2	5453	uc001ccp.1	16339	ENSG00000185668	POU3F1	POU class 3 homeobox 1
chr1	38496112	38496204	X	X	X	Distal Intergenic	1	38509523	38512450	2928	2	5453	uc001ccp.1	16246	ENSG00000185668	POU3F1	POU class 3 homeobox 1
chr1	38512494	38512643		X		Promoter (<=1kb)	1	38509523	38512450	2928	2	5453	uc001ccp.1	-44	ENSG00000185668	POU3F1	POU class 3 homeobox 1
chr1	38518926	38519075			X	Promoter (6-7kb)	1	38509523	38512450	2928	2	5453	uc001ccp.1	-6476	ENSG00000185668	POU3F1	POU class 3 homeobox 1
chr1	38709953	38710102			X	Distal Intergenic	1	38674706	38680439	5734	2	339442	uc021olp.1	-29514	ENSG00000237290	LINC01343	long intergenic non-protein coding RNA 1343
chr1	38721459	38721608	X	X		Distal Intergenic	1	38674706	38680439	5734	2	339442	uc021olp.1	-41020	ENSG00000237290	LINC01343	long intergenic non-protein coding RNA 1343
chr1	39035646	39035795	X	X		Distal Intergenic	1	39303869	39325495	21627	2	64121	uc001ccq.3	289700	ENSG00000116954	RRAGC	Ras related GTP binding C
chr1	39207021	39207170	X	X		Distal Intergenic	1	39303869	39325495	21627	2	64121	uc001ccq.3	118325	ENSG00000116954	RRAGC	Ras related GTP binding C
chr1	39269879	39269981		X	X	Distal Intergenic	1	39303869	39325495	21627	2	64121	uc001ccq.3	55514	ENSG00000116954	RRAGC	Ras related GTP binding C
chr1	39571429	39571574		X	X	"Intron (uc001cdc.2/23499, intron 1 of 61)"	1	39587985	39901433	313449	1	23499	uc001cda.1	-16411	ENSG00000127603	MACF1	microtubule-actin crosslinking factor 1
chr1	39625016	39625165		X		"Intron (uc001cdc.2/23499, intron 1 of 61)"	1	39587985	39901433	313449	1	23499	uc001cda.1	37031	ENSG00000127603	MACF1	microtubule-actin crosslinking factor 1
chr1	39679764	39679913		X		"Intron (uc001cdc.2/23499, intron 1 of 61)"	1	39670423	39748740	78318	1	23499	uc010oit.1	9341	ENSG00000127603	MACF1	microtubule-actin crosslinking factor 1
chr1	39741968	39741980	X	X		"Intron (uc001cdc.2/23499, intron 5 of 61)"	1	39765882	39790406	24525	1	23499	uc009vvq.1	-23902	ENSG00000127603	MACF1	microtubule-actin crosslinking factor 1
chr1	39741981	39742117	X	X	X	"Intron (uc001cdc.2/23499, intron 5 of 61)"	1	39765882	39790406	24525	1	23499	uc009vvq.1	-23765	ENSG00000127603	MACF1	microtubule-actin crosslinking factor 1
chr1	39874489	39874638		X		Promoter (<=1kb)	1	39875176	39882154	6979	1	643314	uc009vvt.1	-538	ENSG00000127603	KIAA0754	KIAA0754
chr1	39980578	39980727			X	"Intron (uc001cdi.3/353500, intron 3 of 6)"	1	39987952	39991357	3406	2	728448	uc001cdj.2	10630	NA	PPIEL	peptidylprolyl isomerase E like pseudogene
chr1	39990075	39990224	X			Promoter (1-2kb)	1	39987952	39991357	3406	2	728448	uc001cdj.2	1133	NA	PPIEL	peptidylprolyl isomerase E like pseudogene
chr1	40254526	40254675			X	Promoter (<=1kb)	1	40223903	40254533	30631	2	656	uc001cdz.1	0	ENSG00000116985	BMP8B	bone morphogenetic protein 8b
chr1	40301735	40301884	X	X		Distal Intergenic	1	40306706	40319740	13035	2	54802	uc001cec.4	17856	ENSG00000043514	TRIT1	tRNA isopentenyltransferase 1
chr1	40367662	40367805		X	X	Promoter (<=1kb)	1	40361096	40367687	6592	2	4610	uc001cer.2	0	ENSG00000116990	MYCL	"MYCL proto-oncogene, bHLH transcription factor"
chr1	40442522	40442671		X		Distal Intergenic	1	40420784	40435628	14845	1	84879	uc010ojc.2	21738	ENSG00000168389	MFSD2A	major facilitator superfamily domain containing 2A
chr1	40506182	40506331		X		Promoter (<=1kb)	1	40506255	40525833	19579	1	10487	uc010ojd.1	0	ENSG00000131236	CAP1	cyclase associated actin cytoskeleton regulatory protein 1
chr1	40723639	40723788		X		Promoter (<=1kb)	1	40723722	40759856	36135	1	10269	uc001cfg.4	0	ENSG00000084073	ZMPSTE24	zinc metallopeptidase STE24
chr1	40782045	40782182		X	X	Promoter (<=1kb)	1	40766163	40782981	16819	2	1298	uc001cfh.1	799	ENSG00000049089	COL9A2	collagen type IX alpha 2 chain
chr1	40782900	40783049	X	X		Promoter (<=1kb)	1	40766163	40782981	16819	2	1298	uc001cfh.1	0	ENSG00000049089	COL9A2	collagen type IX alpha 2 chain
chr1	40974337	40974486	X			Promoter (<=1kb)	1	40974433	40982214	7782	1	64789	uc001cfp.3	0	ENSG00000164002	EXO5	exonuclease 5
chr1	41115793	41115942			X	"Intron (uc001cfu.1/9783, intron 1 of 7)"	1	41086352	41131324	44973	2	9783	uc001cfu.1	15382	ENSG00000117016	RIMS3	regulating synaptic membrane exocytosis 3
chr1	41119656	41119805			X	"Intron (uc001cfu.1/9783, intron 1 of 7)"	1	41086352	41131324	44973	2	9783	uc001cfu.1	11519	ENSG00000117016	RIMS3	regulating synaptic membrane exocytosis 3
chr1	41157759	41157908		X		Promoter (<=1kb)	1	41154752	41157933	3182	2	100130557	uc010ojl.1	25	NA	NFYC-AS1	NFYC antisense RNA 1
chr1	41215622	41215771			X	Promoter (4-5kb)	1	41220027	41220118	92	1	407034	uc001cgf.2	-4256	ENSG00000198974	MIR30E	microRNA 30e
chr1	41268060	41268209			X	"Intron (uc001cgh.2/9132, intron 1 of 13)"	1	41249684	41306124	56441	1	9132	uc001cgi.2	18376	ENSG00000117013	KCNQ4	potassium voltage-gated channel subfamily Q member 4
chr1	41385263	41385407	X		X	Distal Intergenic	1	41326728	41328018	1291	2	163732	uc001cgj.3	-57245	ENSG00000179862	CITED4	Cbp/p300 interacting transactivator with Glu/Asp rich carboxy-terminal domain 4
chr1	41445546	41445695		X		Promoter (<=1kb)	1	41445007	41478235	33229	1	1503	uc010ojo.2	539	ENSG00000171793	CTPS1	CTP synthase 1
chr1	41487688	41487837	X			Promoter (<=1kb)	1	41481269	41487427	6159	2	200172	uc001cgn.2	-261	ENSG00000171790	SLFNL1	schlafen like 1
chr1	41616735	41616884		X		"Intron (uc010ojr.2/22955, intron 1 of 8)"	1	41492871	41625605	132735	2	22955	uc010ojr.2	8721	ENSG00000010803	SCMH1	Scm polycomb group protein homolog 1
chr1	41847756	41847905			X	Distal Intergenic	1	41944446	41949874	5429	2	1907	uc001cgu.3	101969	ENSG00000127129	EDN2	endothelin 2
chr1	41948373	41948522			X	Promoter (1-2kb)	1	41944446	41949874	5429	2	1907	uc001cgu.3	1352	ENSG00000127129	EDN2	endothelin 2
chr1	41951474	41951623		X		Promoter (1-2kb)	1	41944446	41950344	5899	2	1907	uc001cgx.3	-1130	ENSG00000127129	EDN2	endothelin 2
chr1	41987588	41987737		X		"Intron (uc001cgy.3/59269, intron 2 of 4)"	1	41944446	41950344	5899	2	1907	uc001cgx.3	-37244	ENSG00000127129	EDN2	endothelin 2
chr1	42501232	42501376		X	X	Promoter (<=1kb)	1	42312860	42501596	188737	2	59269	uc001chb.2	220	ENSG00000127124	HIVEP3	human immunodeficiency virus type I enhancer binding protein 3
chr1	42630433	42630448	X	X		Promoter (<=1kb)	1	42628362	42630395	2034	2	2980	uc001chd.1	-38	ENSG00000197273	GUCA2A	guanylate cyclase activator 2A
chr1	42630449	42630582	X	X	X	Promoter (<=1kb)	1	42628362	42630395	2034	2	2980	uc001chd.1	-54	ENSG00000197273	GUCA2A	guanylate cyclase activator 2A
chr1	42800927	42801076		X		Promoter (<=1kb)	1	42642210	42800903	158694	2	22887	uc001chh.2	-24	ENSG00000198815	FOXJ3	forkhead box J3
chr1	43147928	43148077		X		Promoter (<=1kb)	1	43148066	43168020	19955	1	4904	uc001chs.3	0	ENSG00000065978	YBX1	Y-box binding protein 1
chr1	43232754	43232903		X		Promoter (<=1kb)	1	43212006	43232755	20750	2	64175	uc001chv.2	0	ENSG00000117385	P3H1	prolyl 3-hydroxylase 1
chr1	43282903	43283052		X		Promoter (<=1kb)	1	43272723	43283059	10337	2	374969	uc001cib.2	7	ENSG00000177868	SVBP	small vasohibin binding protein
chr1	43291091	43291240	X			Promoter (<=1kb)	1	43291249	43310660	19412	1	114625	uc001cie.1	-9	ENSG00000164010	ERMAP	erythroblast membrane associated protein (Scianna blood group)
chr1	43297050	43297191		X	X	Promoter (1-2kb)	1	43295586	43310660	15075	1	114625	uc001cif.1	1464	ENSG00000164010	ERMAP	erythroblast membrane associated protein (Scianna blood group)
chr1	43300643	43300741	X	X	X	"Exon (uc010ojw.1/114625, exon 5 of 8)"	1	43295586	43310660	15075	1	114625	uc001cif.1	5057	ENSG00000164010	ERMAP	erythroblast membrane associated protein (Scianna blood group)
chr1	43300742	43300792	X	X		"Exon (uc010ojw.1/114625, exon 5 of 8)"	1	43295586	43310660	15075	1	114625	uc001cif.1	5156	ENSG00000164010	ERMAP	erythroblast membrane associated protein (Scianna blood group)
chr1	43424515	43424664		X		Promoter (<=1kb)	1	43424720	43449029	24310	1	440584	uc001cil.3	-56	ENSG00000227533	SLC2A1-AS1	SLC2A1 antisense RNA 1
chr1	43457883	43457895	X	X		Distal Intergenic	1	43391046	43424847	33802	2	6513	uc001cik.2	-33036	ENSG00000117394	SLC2A1	solute carrier family 2 member 1
chr1	43457896	43458032	X	X	X	Distal Intergenic	1	43391046	43424847	33802	2	6513	uc001cik.2	-33049	ENSG00000117394	SLC2A1	solute carrier family 2 member 1
chr1	43483903	43484026	X	X	X	Distal Intergenic	1	43391046	43424847	33802	2	6513	uc001cik.2	-59056	ENSG00000117394	SLC2A1	solute carrier family 2 member 1
chr1	43484027	43484052	X	X		Distal Intergenic	1	43391046	43424847	33802	2	6513	uc001cik.2	-59180	ENSG00000117394	SLC2A1	solute carrier family 2 member 1
chr1	43518950	43518955	X	X		Distal Intergenic	1	43391046	43424847	33802	2	6513	uc001cik.2	-94103	ENSG00000117394	SLC2A1	solute carrier family 2 member 1
chr1	43518956	43519099	X	X	X	Distal Intergenic	1	43391046	43424847	33802	2	6513	uc001cik.2	-94109	ENSG00000117394	SLC2A1	solute carrier family 2 member 1
chr1	43585678	43585827			X	"Exon (uc009vwn.1/uc009vwn.1, exon 1 of 3)"	1	43613594	43622067	8474	1	440585	uc009vwo.3	-27767	ENSG00000186973	FAM183A	family with sequence similarity 183 member A
chr1	43814758	43814907		X		Promoter (9-10kb)	1	43824626	43828873	4248	1	991	uc001cix.3	-9719	ENSG00000117399	CDC20	cell division cycle 20
chr1	43833652	43833801		X		Promoter (<=1kb)	1	43829068	43833745	4678	2	64834	uc001cjb.4	0	ENSG00000066322	ELOVL1	ELOVL fatty acid elongase 1
chr1	43918858	43919004		X	X	Promoter (<=1kb)	1	43916674	43919176	2503	2	81888	uc001cjm.3	172	ENSG00000178922	HYI	hydroxypyruvate isomerase (putative)
chr1	43996403	43996552			X	Promoter (<=1kb)	1	43996547	44045736	49190	1	5792	uc001cjq.4	0	ENSG00000142949	PTPRF	"protein tyrosine phosphatase, receptor type F"
chr1	44015871	44016020		X		"Intron (uc001cjq.4/5792, intron 3 of 7)"	1	44003869	44045736	41868	1	5792	uc001cjt.4	12002	ENSG00000142949	PTPRF	"protein tyrosine phosphatase, receptor type F"
chr1	44031321	44031463		X	X	"Intron (uc001cjq.4/5792, intron 5 of 7)"	1	44056643	44089343	32701	1	5792	uc001cju.3	-25180	ENSG00000142949	PTPRF	"protein tyrosine phosphatase, receptor type F"
chr1	44044311	44044447	X		X	"Intron (uc001cjq.4/5792, intron 7 of 7)"	1	44056643	44089343	32701	1	5792	uc001cju.3	-12196	ENSG00000142949	PTPRF	"protein tyrosine phosphatase, receptor type F"
chr1	44115622	44115771		X		Promoter (<=1kb)	1	44115797	44171189	55393	1	9682	uc001cjx.3	-26	ENSG00000066135	KDM4A	lysine demethylase 4A
chr1	44116041	44116190		X		Promoter (<=1kb)	1	44115797	44171189	55393	1	9682	uc010oki.2	244	ENSG00000066135	KDM4A	lysine demethylase 4A
chr1	44173087	44173236		X		Promoter (<=1kb)	1	44173204	44385889	212686	1	6487	uc010okj.2	0	ENSG00000126091	ST3GAL3	"ST3 beta-galactoside alpha-2,3-sialyltransferase 3"
chr1	44231881	44232030		X		"Intron (uc009vwu.1/6487, intron 2 of 7)"	1	44201904	44396837	194934	1	6487	uc001ckl.4	29977	ENSG00000126091	ST3GAL3	"ST3 beta-galactoside alpha-2,3-sialyltransferase 3"
chr1	44466036	44466173		X	X	"Intron (uc009vxe.2/6536, intron 11 of 11)"	1	44457519	44462198	4680	1	149473	uc009vxc.3	8517	ENSG00000159214	CCDC24	coiled-coil domain containing 24
chr1	44600369	44600497		X	X	3' UTR	1	44584522	44600809	16288	1	128209	uc001clp.3	15847	ENSG00000171872	KLF17	Kruppel like factor 17
chr1	44756371	44756490	X	X	X	"Intron (uc010okv.2/79033, intron 4 of 6)"	1	44686742	44818597	131856	2	79033	uc010okv.2	62107	ENSG00000117419	ERI3	ERI1 exoribonuclease family member 3
chr1	44756491	44756520	X	X		"Intron (uc010okv.2/79033, intron 4 of 6)"	1	44686742	44818597	131856	2	79033	uc010okv.2	62077	ENSG00000117419	ERI3	ERI1 exoribonuclease family member 3
chr1	44947560	44947709	X	X		"Intron (uc001clv.1/55182, intron 2 of 14)"	1	44889496	45117396	227901	1	55182	uc010oky.1	58064	ENSG00000187147	RNF220	ring finger protein 220
chr1	45097453	45097602			X	Promoter (<=1kb)	1	45097704	45117395	19692	1	55182	uc010okz.2	-102	ENSG00000187147	RNF220	ring finger protein 220
chr1	45127799	45127948			X	Promoter (1-2kb)	1	45119909	45125967	6059	2	79639	uc010ola.1	-1832	ENSG00000126106	TMEM53	transmembrane protein 53
chr1	45150546	45150693		X	X	"Intron (uc001cmf.2/339541, intron 1 of 11)"	1	45140394	45191263	50870	1	339541	uc001cmf.2	10152	ENSG00000198520	ARMH1	armadillo-like helical domain containing 1
chr1	45196503	45196652		X		Promoter (8-9kb)	1	45205490	45233438	27949	1	11004	uc001cmg.4	-8838	ENSG00000142945	KIF2C	kinesin family member 2C
chr1	45265822	45265971		X		Promoter (<=1kb)	1	45266036	45271667	5632	1	1263	uc001cmn.3	-65	ENSG00000173846	PLK3	polo like kinase 3
chr1	45285375	45285524		X		3' UTR	1	45274154	45279801	5648	1	149478	uc010ole.1	11221	ENSG00000222009	BTBD19	BTB domain containing 19
chr1	45285826	45285975		X		3' UTR	1	45274154	45279801	5648	1	149478	uc010ole.1	11672	ENSG00000222009	BTBD19	BTB domain containing 19
chr1	45308897	45309046		X		Promoter (<=1kb)	1	45287938	45308616	20679	2	8643	uc010olg.2	-281	ENSG00000117425	PTCH2	patched 2
chr1	45477756	45477905		X		Promoter (<=1kb)	1	45477805	45479663	1859	1	7389	uc010oli.2	0	ENSG00000126088	UROD	uroporphyrinogen decarboxylase
chr1	45805708	45805857		X		Promoter (<=1kb)	1	45794914	45805787	10874	2	4595	uc001cnh.3	0	ENSG00000132781	MUTYH	mutY DNA glycosylase
chr1	45912364	45912513		X		"Intron (uc009vxr.1/10420, intron 1 of 8)"	1	45809555	45923543	113989	2	10420	uc009vxr.1	11030	ENSG00000070759	TESK2	testis associated actin remodelling kinase 2
chr1	45956905	45957054		X		Promoter (<=1kb)	1	45864144	45956840	92697	2	10420	uc010olp.1	-65	ENSG00000070759	TESK2	testis associated actin remodelling kinase 2
chr1	45987483	45987632		X		Promoter (<=1kb)	1	45976707	45987610	10904	2	5052	uc001coa.3	0	ENSG00000117450	PRDX1	peroxiredoxin 1
chr1	46049594	46049743		X		Promoter (<=1kb)	1	46049660	46079853	30194	1	4678	uc010olq.2	0	ENSG00000132780	NASP	nuclear autoantigenic sperm protein
chr1	46152224	46152373		X		Promoter (<=1kb)	1	46092976	46152302	59327	2	60313	uc001coq.3	0	ENSG00000159592	GPBP1L1	GC-rich promoter binding protein 1 like 1
chr1	46152833	46152982		X		Promoter (<=1kb)	1	46092976	46152302	59327	2	60313	uc001coq.3	-531	ENSG00000159592	GPBP1L1	GC-rich promoter binding protein 1 like 1
chr1	46269207	46269352		X	X	Promoter (<=1kb)	1	46269285	46501796	232512	1	23139	uc001cov.3	0	ENSG00000086015	MAST2	microtubule associated serine/threonine kinase 2
chr1	46269687	46269836		X		Promoter (<=1kb)	1	46269285	46501796	232512	1	23139	uc001cow.3	402	ENSG00000086015	MAST2	microtubule associated serine/threonine kinase 2
chr1	46379113	46379262		X		Promoter (<=1kb)	1	46379260	46496433	117174	1	23139	uc001coz.1	0	ENSG00000086015	MAST2	microtubule associated serine/threonine kinase 2
chr1	46392950	46393077		X	X	"Intron (uc001cov.3/23139, intron 4 of 28)"	1	46379265	46489944	110680	1	23139	uc009vya.3	13685	ENSG00000086015	MAST2	microtubule associated serine/threonine kinase 2
chr1	46435052	46435201	X	X		"Intron (uc001cov.3/23139, intron 5 of 28)"	1	46471913	46501794	29882	1	23139	uc001cpa.3	-36712	ENSG00000086015	MAST2	microtubule associated serine/threonine kinase 2
chr1	46598621	46598770		X		Promoter (<=1kb)	1	46505812	46598708	92897	2	8503	uc001cpc.4	0	ENSG00000117461	PIK3R3	phosphoinositide-3-kinase regulatory subunit 3
chr1	46664023	46664172			X	Promoter (<=1kb)	1	46654353	46664121	9769	2	55624	uc001cpe.3	0	ENSG00000085998	POMGNT1	"protein O-linked mannose N-acetylglucosaminyltransferase 1 (beta 1,2-)"
chr1	46720148	46720297		X		"Intron (uc001cpl.2/8438, intron 3 of 17)"	1	46713367	46744145	30779	1	8438	uc009vye.2	6781	ENSG00000085999	RAD54L	RAD54 like
chr1	46872154	46872303		X		Promoter (<=1kb)	1	46871260	46879520	8261	1	2166	uc001cpv.2	894	ENSG00000117480	FAAH	fatty acid amide hydrolase
chr1	46955355	46955504		X		Distal Intergenic	1	46972668	46979886	7219	1	127343	uc001cpw.3	-17164	ENSG00000197587	DMBX1	diencephalon/mesencephalon homeobox 1
chr1	46962711	46962776		X	X	Promoter (9-10kb)	1	46972668	46979886	7219	1	127343	uc001cpw.3	-9892	ENSG00000197587	DMBX1	diencephalon/mesencephalon homeobox 1
chr1	46991005	46991154			X	Distal Intergenic	1	47004368	47035927	31560	1	100507423	uc021onb.1	-13214	ENSG00000269956	MKNK1-AS1	MKNK1 antisense RNA 1
chr1	46998881	46999030			X	Promoter (5-6kb)	1	47004368	47035927	31560	1	100507423	uc021onb.1	-5338	ENSG00000269956	MKNK1-AS1	MKNK1 antisense RNA 1
chr1	47069896	47070045		X		Promoter (<=1kb)	1	47023079	47069966	46888	2	8569	uc001cqb.4	0	ENSG00000079277	MKNK1	MAP kinase interacting serine/threonine kinase 1
chr1	47184811	47184960		X		Promoter (<=1kb)	1	47140831	47184736	43906	2	9813	uc001cqk.4	-75	ENSG00000159658	EFCAB14	EF-hand calcium binding domain 14
chr1	47220969	47220974	X	X		Distal Intergenic	1	47140831	47184736	43906	2	9813	uc001cqk.4	-36233	ENSG00000159658	EFCAB14	EF-hand calcium binding domain 14
chr1	47220975	47221118	X	X	X	Distal Intergenic	1	47140831	47184736	43906	2	9813	uc001cqk.4	-36239	ENSG00000159658	EFCAB14	EF-hand calcium binding domain 14
chr1	47254516	47254640	X	X		Distal Intergenic	1	47264670	47281083	16414	1	1580	uc009vyl.1	-10030	ENSG00000142973	CYP4B1	cytochrome P450 family 4 subfamily B member 1
chr1	47254641	47254665	X	X	X	Distal Intergenic	1	47264670	47281083	16414	1	1580	uc009vyl.1	-10005	ENSG00000142973	CYP4B1	cytochrome P450 family 4 subfamily B member 1
chr1	47595830	47595832	X	X		Promoter (7-8kb)	1	47603107	47613153	10047	1	284541	uc009vyo.3	-7275	ENSG00000162365	CYP4A22	cytochrome P450 family 4 subfamily A member 22
chr1	47595833	47595979	X	X	X	Promoter (7-8kb)	1	47603107	47613153	10047	1	284541	uc009vyo.3	-7128	ENSG00000162365	CYP4A22	cytochrome P450 family 4 subfamily A member 22
chr1	47773626	47773731		X	X	"Intron (uc001crb.1/6491, intron 1 of 1)"	1	47715811	47778828	63018	2	6491	uc010omn.1	5097	ENSG00000123473	STIL	"STIL, centriolar assembly protein"
chr1	47779897	47780046		X		Promoter (<=1kb)	1	47725961	47779819	53859	2	6491	uc001crg.1	-78	ENSG00000123473	STIL	"STIL, centriolar assembly protein"
chr1	47799389	47799538		X		Promoter (<=1kb)	1	47799469	47824547	25079	1	51727	uc001crh.2	0	ENSG00000162368	CMPK1	cytidine/uridine monophosphate kinase 1
chr1	47882351	47882500			X	Promoter (<=1kb)	1	47881744	47883724	1981	1	2301	uc001crk.3	607	ENSG00000186790	FOXE3	forkhead box E3
chr1	47903486	47903635		X		Promoter (1-2kb)	1	47901689	47906363	4675	1	2306	uc001crm.3	1797	ENSG00000186564	FOXD2	forkhead box D2
chr1	47998874	47999023		X		Distal Intergenic	1	47901689	47906363	4675	1	2306	uc001crm.3	97185	ENSG00000186564	FOXD2	forkhead box D2
chr1	48038794	48038943		X		Distal Intergenic	1	47901689	47906363	4675	1	2306	uc001crm.3	137105	ENSG00000186564	FOXD2	forkhead box D2
chr1	48152384	48152533		X		Distal Intergenic	1	47901689	47906363	4675	1	2306	uc001crm.3	250695	ENSG00000186564	FOXD2	forkhead box D2
chr1	48169048	48169197	X			Distal Intergenic	1	47901689	47906363	4675	1	2306	uc001crm.3	267359	ENSG00000186564	FOXD2	forkhead box D2
chr1	48231094	48231187		X	X	3' UTR	1	48226200	48462562	236363	2	388630	uc021ong.1	231375	ENSG00000269113	TRABD2B	TraB domain containing 2B
chr1	48247889	48248038	X	X		"Intron (uc021ong.1/388630, intron 4 of 6)"	1	48226200	48462562	236363	2	388630	uc021ong.1	214524	ENSG00000269113	TRABD2B	TraB domain containing 2B
chr1	48363944	48364093		X		"Intron (uc021ong.1/388630, intron 2 of 6)"	1	48226200	48462562	236363	2	388630	uc021ong.1	98469	ENSG00000269113	TRABD2B	TraB domain containing 2B
chr1	48413928	48414039		X	X	"Intron (uc021ong.1/388630, intron 2 of 6)"	1	48226200	48462562	236363	2	388630	uc021ong.1	48523	ENSG00000269113	TRABD2B	TraB domain containing 2B
chr1	48449872	48450021		X		"Intron (uc021ong.1/388630, intron 2 of 6)"	1	48226200	48462562	236363	2	388630	uc021ong.1	12541	ENSG00000269113	TRABD2B	TraB domain containing 2B
chr1	48463372	48463521		X		Promoter (<=1kb)	1	48226200	48462562	236363	2	388630	uc021ong.1	-810	ENSG00000269113	TRABD2B	TraB domain containing 2B
chr1	48490930	48491079		X		Distal Intergenic	1	48226200	48462562	236363	2	388630	uc021ong.1	-28368	ENSG00000269113	TRABD2B	TraB domain containing 2B
chr1	48502839	48502988		X		Distal Intergenic	1	48226200	48462562	236363	2	388630	uc021ong.1	-40277	ENSG00000269113	TRABD2B	TraB domain containing 2B
chr1	48514751	48514900		X		Distal Intergenic	1	48226200	48462562	236363	2	388630	uc021ong.1	-52189	ENSG00000269113	TRABD2B	TraB domain containing 2B
chr1	48515911	48516060		X		Distal Intergenic	1	48226200	48462562	236363	2	388630	uc021ong.1	-53349	ENSG00000269113	TRABD2B	TraB domain containing 2B
chr1	48533986	48534015	X	X		Distal Intergenic	1	48226200	48462562	236363	2	388630	uc021ong.1	-71424	ENSG00000269113	TRABD2B	TraB domain containing 2B
chr1	48534016	48534135	X	X	X	Distal Intergenic	1	48226200	48462562	236363	2	388630	uc021ong.1	-71454	ENSG00000269113	TRABD2B	TraB domain containing 2B
chr1	48627218	48627367		X		"Intron (uc010omr.1/391037, intron 6 of 9)"	1	48567387	48648100	80714	2	391037	uc010omr.1	20733	NA	SKINT1L	Skint1 like (pseudogene)
chr1	48680222	48680371		X		Promoter (7-8kb)	1	48688357	48703519	15163	1	200010	uc010oms.1	-7986	ENSG00000117834	SLC5A9	solute carrier family 5 member 9
chr1	48908615	48908741		X	X	"Intron (uc001crr.2/54558, intron 3 of 12)"	1	48761044	48937876	176833	2	54558	uc001crr.2	29135	ENSG00000132122	SPATA6	spermatogenesis associated 6
chr1	48937797	48937946		X		Promoter (<=1kb)	1	48761044	48937876	176833	2	54558	uc001crr.2	0	ENSG00000132122	SPATA6	spermatogenesis associated 6
chr1	48946298	48946447		X		Promoter (8-9kb)	1	48761044	48937876	176833	2	54558	uc010omv.2	-8422	ENSG00000132122	SPATA6	spermatogenesis associated 6
chr1	48966261	48966410		X		Distal Intergenic	1	48761044	48937876	176833	2	54558	uc010omv.2	-28385	ENSG00000132122	SPATA6	spermatogenesis associated 6
chr1	49066645	49066794	X	X		"Intron (uc001cru.2/84871, intron 9 of 13)"	1	48761044	48937876	176833	2	54558	uc010omv.2	-128769	ENSG00000132122	SPATA6	spermatogenesis associated 6
chr1	49076764	49076913		X		"Intron (uc001cru.2/84871, intron 9 of 13)"	1	48761044	48937876	176833	2	54558	uc010omv.2	-138888	ENSG00000132122	SPATA6	spermatogenesis associated 6
chr1	49119891	49120040	X	X		"Intron (uc001cru.2/84871, intron 7 of 13)"	1	49193540	49242547	49008	2	79656	uc001crw.4	122507	ENSG00000162373	BEND5	BEN domain containing 5
chr1	49120236	49120385		X		"Intron (uc001cru.2/84871, intron 7 of 13)"	1	49193540	49242547	49008	2	79656	uc001crw.4	122162	ENSG00000162373	BEND5	BEN domain containing 5
chr1	49136235	49136384	X	X		"Intron (uc001cru.2/84871, intron 6 of 13)"	1	49193540	49242547	49008	2	79656	uc001crw.4	106163	ENSG00000162373	BEND5	BEN domain containing 5
chr1	49209790	49209904	X	X	X	"Intron (uc001cru.2/84871, intron 6 of 13)"	1	49193540	49242547	49008	2	79656	uc001crw.4	32643	ENSG00000162373	BEND5	BEN domain containing 5
chr1	49209905	49209939	X	X		"Intron (uc001cru.2/84871, intron 6 of 13)"	1	49193540	49242547	49008	2	79656	uc001crw.4	32608	ENSG00000162373	BEND5	BEN domain containing 5
chr1	49517424	49517573		X		Promoter (5-6kb)	1	49049542	49511472	461931	2	84871	uc010omy.1	-5952	ENSG00000186094	AGBL4	ATP/GTP binding protein like 4
chr1	49587474	49587623		X		"Intron (uc001cru.2/84871, intron 4 of 13)"	1	49049542	49511472	461931	2	84871	uc010omy.1	-76002	ENSG00000186094	AGBL4	ATP/GTP binding protein like 4
chr1	49812686	49812835	X	X		"Intron (uc001cru.2/84871, intron 3 of 13)"	1	49049542	49511472	461931	2	84871	uc010omy.1	-301214	ENSG00000186094	AGBL4	ATP/GTP binding protein like 4
chr1	49931021	49931170		X		"Intron (uc001cru.2/84871, intron 3 of 13)"	1	49049542	49511472	461931	2	84871	uc010omy.1	-419549	ENSG00000186094	AGBL4	ATP/GTP binding protein like 4
chr1	50051062	50051211		X		"Intron (uc001cru.2/84871, intron 3 of 13)"	1	48998527	50489626	1491100	2	84871	uc001cru.2	438415	ENSG00000186094	AGBL4	ATP/GTP binding protein like 4
chr1	50108230	50108237	X	X		"Intron (uc001cru.2/84871, intron 3 of 13)"	1	48998527	50489626	1491100	2	84871	uc001cru.2	381389	ENSG00000186094	AGBL4	ATP/GTP binding protein like 4
chr1	50108238	50108379	X	X	X	"Intron (uc001cru.2/84871, intron 3 of 13)"	1	48998527	50489626	1491100	2	84871	uc001cru.2	381247	ENSG00000186094	AGBL4	ATP/GTP binding protein like 4
chr1	50513884	50514033		X		Promoter (<=1kb)	1	50513686	50667540	153855	1	1996	uc001cry.3	198	ENSG00000162374	ELAVL4	ELAV like RNA binding protein 4
chr1	50576484	50576630		X	X	Promoter (1-2kb)	1	50575479	50667540	92062	1	1996	uc010omz.2	1005	ENSG00000162374	ELAVL4	ELAV like RNA binding protein 4
chr1	50592715	50592864		X		"Intron (uc001cry.3/1996, intron 1 of 6)"	1	50575479	50667540	92062	1	1996	uc010omz.2	17236	ENSG00000162374	ELAVL4	ELAV like RNA binding protein 4
chr1	50605225	50605368	X	X	X	"Intron (uc001cry.3/1996, intron 1 of 6)"	1	50575479	50667540	92062	1	1996	uc010omz.2	29746	ENSG00000162374	ELAVL4	ELAV like RNA binding protein 4
chr1	50605369	50605374	X	X		"Intron (uc001cry.3/1996, intron 1 of 6)"	1	50575479	50667540	92062	1	1996	uc010omz.2	29890	ENSG00000162374	ELAVL4	ELAV like RNA binding protein 4
chr1	50613256	50613405	X	X		"Intron (uc001cry.3/1996, intron 2 of 6)"	1	50575479	50667540	92062	1	1996	uc010omz.2	37777	ENSG00000162374	ELAVL4	ELAV like RNA binding protein 4
chr1	50664361	50664510		X		"Intron (uc001cry.3/1996, intron 6 of 6)"	1	50575479	50667540	92062	1	1996	uc010omz.2	88882	ENSG00000162374	ELAVL4	ELAV like RNA binding protein 4
chr1	50731195	50731344		X		Distal Intergenic	1	50575479	50667540	92062	1	1996	uc010omz.2	155716	ENSG00000162374	ELAVL4	ELAV like RNA binding protein 4
chr1	50859486	50859635		X		Distal Intergenic	1	50883223	50887304	4082	2	63950	uc010ona.2	27669	ENSG00000142700	DMRTA2	DMRT like family A2
chr1	50884534	50884683		X		Promoter (2-3kb)	1	50883223	50887304	4082	2	63950	uc010ona.2	2621	ENSG00000142700	DMRTA2	DMRT like family A2
chr1	50889100	50889249		X		Promoter (<=1kb)	1	50883223	50889119	5897	2	63950	uc010onb.2	0	ENSG00000142700	DMRTA2	DMRT like family A2
chr1	50908565	50908581	X	X		"Intron (uc010onc.1/11124, intron 11 of 11)"	1	50883223	50889119	5897	2	63950	uc010onb.2	-19446	ENSG00000142700	DMRTA2	DMRT like family A2
chr1	50908582	50908714	X	X	X	"Intron (uc010onc.1/11124, intron 11 of 11)"	1	50883223	50889119	5897	2	63950	uc010onb.2	-19463	ENSG00000142700	DMRTA2	DMRT like family A2
chr1	50920682	50920831		X		"Intron (uc010onc.1/11124, intron 11 of 11)"	1	50883223	50889119	5897	2	63950	uc010onb.2	-31563	ENSG00000142700	DMRTA2	DMRT like family A2
chr1	50996506	50996508	X	X		"Intron (uc010onc.1/11124, intron 8 of 11)"	1	50906935	51078170	171236	2	11124	uc010onc.1	81662	ENSG00000185104	FAF1	Fas associated factor 1
chr1	50996509	50996655	X	X	X	"Intron (uc010onc.1/11124, intron 8 of 11)"	1	50906935	51078170	171236	2	11124	uc010onc.1	81515	ENSG00000185104	FAF1	Fas associated factor 1
chr1	51034640	51034789	X	X		"Intron (uc010onc.1/11124, intron 5 of 11)"	1	50906935	51078170	171236	2	11124	uc010onc.1	43381	ENSG00000185104	FAF1	Fas associated factor 1
chr1	51120696	51120837		X	X	"Intron (uc009vyw.1/11124, intron 7 of 15)"	1	50906935	51078170	171236	2	11124	uc010onc.1	-42526	ENSG00000185104	FAF1	Fas associated factor 1
chr1	51186243	51186392		X		"Intron (uc009vyw.1/11124, intron 6 of 15)"	1	50906935	51078170	171236	2	11124	uc010onc.1	-108073	ENSG00000185104	FAF1	Fas associated factor 1
chr1	51186856	51187005		X		"Intron (uc009vyw.1/11124, intron 6 of 15)"	1	50906935	51078170	171236	2	11124	uc010onc.1	-108686	ENSG00000185104	FAF1	Fas associated factor 1
chr1	51376115	51376264	X	X		"Intron (uc009vyw.1/11124, intron 1 of 15)"	1	50906935	51425525	518591	2	11124	uc009vyw.1	49261	ENSG00000185104	FAF1	Fas associated factor 1
chr1	51397008	51397157	X	X		"Intron (uc009vyw.1/11124, intron 1 of 15)"	1	50906935	51425525	518591	2	11124	uc009vyw.1	28368	ENSG00000185104	FAF1	Fas associated factor 1
chr1	51434159	51434308		X		Promoter (<=1kb)	1	51433608	51440309	6702	1	1031	uc001csf.3	551	ENSG00000123080	CDKN2C	cyclin dependent kinase inhibitor 2C
chr1	51435342	51435491		X		Promoter (<=1kb)	1	51435642	51440309	4668	1	1031	uc001csg.3	-151	ENSG00000123080	CDKN2C	cyclin dependent kinase inhibitor 2C
chr1	51443888	51444037		X		Distal Intergenic	1	51435642	51440309	4668	1	1031	uc001csg.3	8246	ENSG00000123080	CDKN2C	cyclin dependent kinase inhibitor 2C
chr1	51701867	51702016		X		Promoter (<=1kb)	1	51701945	51739119	37175	1	26994	uc001csi.4	0	ENSG00000123091	RNF11	ring finger protein 11
chr1	51984839	51984988		X		Promoter (<=1kb)	1	51819935	51984995	165061	2	2060	uc001csq.1	7	ENSG00000085832	EPS15	epidermal growth factor receptor pathway substrate 15
chr1	52107398	52107547		X		"Intron (uc001css.4/114883, intron 4 of 25)"	1	52082546	52254891	172346	1	114883	uc009vza.3	24852	ENSG00000117859	OSBPL9	oxysterol binding protein like 9
chr1	52114075	52114224		X		"Intron (uc001css.4/114883, intron 4 of 25)"	1	52082546	52254891	172346	1	114883	uc009vza.3	31529	ENSG00000117859	OSBPL9	oxysterol binding protein like 9
chr1	52195294	52195443		X		Promoter (<=1kb)	1	52195486	52254891	59406	1	114883	uc001csy.3	-43	ENSG00000117859	OSBPL9	oxysterol binding protein like 9
chr1	52429506	52429650		X	X	"Intron (uc001cth.3/5865, intron 2 of 4)"	1	52373628	52456436	82809	2	5865	uc001cth.3	26786	ENSG00000169213	RAB3B	"RAB3B, member RAS oncogene family"
chr1	52442995	52443114	X	X	X	"Intron (uc001cth.3/5865, intron 1 of 4)"	1	52373628	52456436	82809	2	5865	uc001cth.3	13322	ENSG00000169213	RAB3B	"RAB3B, member RAS oncogene family"
chr1	52443115	52443144	X	X		"Intron (uc001cth.3/5865, intron 1 of 4)"	1	52373628	52456436	82809	2	5865	uc001cth.3	13292	ENSG00000169213	RAB3B	"RAB3B, member RAS oncogene family"
chr1	52472093	52472242	X	X	X	Distal Intergenic	1	52373628	52456436	82809	2	5865	uc001cth.3	-15657	ENSG00000169213	RAB3B	"RAB3B, member RAS oncogene family"
chr1	52585493	52585582	X	X		Distal Intergenic	1	52607766	52729719	121954	1	9372	uc001ctn.4	-22184	ENSG00000157077	ZFYVE9	zinc finger FYVE-type containing 9
chr1	52585583	52585642	X	X	X	Distal Intergenic	1	52607766	52729719	121954	1	9372	uc001ctn.4	-22124	ENSG00000157077	ZFYVE9	zinc finger FYVE-type containing 9
chr1	52607681	52607830		X		Promoter (<=1kb)	1	52607766	52729719	121954	1	9372	uc001ctn.4	0	ENSG00000157077	ZFYVE9	zinc finger FYVE-type containing 9
chr1	52706294	52706443		X		"Intron (uc001ctn.4/9372, intron 4 of 4)"	1	52607766	52812358	204593	1	9372	uc001ctp.4	98528	ENSG00000157077	ZFYVE9	zinc finger FYVE-type containing 9
chr1	53018452	53018601		X		Promoter (<=1kb)	1	52888948	53018762	129815	2	23318	uc001ctx.2	161	ENSG00000134744	ZCCHC11	zinc finger CCHC-type containing 11
chr1	53018872	53019021		X		Promoter (<=1kb)	1	52903892	53018772	114881	2	23318	uc009vze.1	-100	ENSG00000134744	ZCCHC11	zinc finger CCHC-type containing 11
chr1	53068086	53068235			X	Promoter (<=1kb)	1	53068043	53074723	6681	1	2882	uc001cue.3	43	ENSG00000116157	GPX7	glutathione peroxidase 7
chr1	53078590	53078709	X	X	X	Distal Intergenic	1	53068043	53074723	6681	1	2882	uc001cue.3	10547	ENSG00000116157	GPX7	glutathione peroxidase 7
chr1	53078710	53078739	X	X		Distal Intergenic	1	53068043	53074723	6681	1	2882	uc001cue.3	10667	ENSG00000116157	GPX7	glutathione peroxidase 7
chr1	53102408	53102557		X		"Intron (uc001cuf.3/348378, intron 1 of 2)"	1	53099066	53135339	36274	1	348378	uc001cuh.3	3342	ENSG00000182183	SHISAL2A	shisa like 2A
chr1	53103179	53103328		X	X	"Intron (uc001cuf.3/348378, intron 1 of 2)"	1	53099066	53135339	36274	1	348378	uc001cuh.3	4113	ENSG00000182183	SHISAL2A	shisa like 2A
chr1	53140555	53140704		X		Distal Intergenic	1	53152014	53164038	12025	2	65260	uc001cui.2	23334	ENSG00000162377	COA7	cytochrome c oxidase assembly factor 7 (putative)
chr1	53192069	53192218		X		Promoter (<=1kb)	1	53192131	53282312	90182	1	79699	uc009vzg.3	0	ENSG00000162378	ZYG11B	"zyg-11 family member B, cell cycle regulator"
chr1	53581725	53581873	X	X	X	"Exon (uc001cva.1/uc001cva.1, exon 1 of 2)"	1	53552855	53556654	3800	2	6512	uc001cux.3	-25071	ENSG00000162383	SLC1A7	solute carrier family 1 member 7
chr1	53581874	53581874	X	X		"Exon (uc001cva.1/uc001cva.1, exon 1 of 2)"	1	53552855	53556654	3800	2	6512	uc001cux.3	-25220	ENSG00000162383	SLC1A7	solute carrier family 1 member 7
chr1	53611847	53611996		X		Promoter (3-4kb)	1	53573600	53608289	34690	2	6512	uc001cuz.4	-3558	ENSG00000162383	SLC1A7	solute carrier family 1 member 7
chr1	53791945	53792094		X		Promoter (<=1kb)	1	53708041	53793071	85031	2	7804	uc001cvh.2	977	ENSG00000157193	LRP8	LDL receptor related protein 8
chr1	53814659	53814757		X	X	Distal Intergenic	1	53708041	53793821	85781	2	7804	uc001cvl.2	-20838	ENSG00000157193	LRP8	LDL receptor related protein 8
chr1	53816590	53816739			X	Distal Intergenic	1	53708041	53793821	85781	2	7804	uc001cvl.2	-22769	ENSG00000157193	LRP8	LDL receptor related protein 8
chr1	53836876	53837025			X	Distal Intergenic	1	53708041	53793821	85781	2	7804	uc001cvl.2	-43055	ENSG00000157193	LRP8	LDL receptor related protein 8
chr1	53850580	53850710		X	X	Distal Intergenic	1	53904043	53905693	1651	2	163742	uc009vzj.3	54983	ENSG00000236253	SLC25A3P1	solute carrier family 25 member 3 pseudogene 1
chr1	53851519	53851668			X	Distal Intergenic	1	53904043	53905693	1651	2	163742	uc009vzj.3	54025	ENSG00000236253	SLC25A3P1	solute carrier family 25 member 3 pseudogene 1
chr1	53881169	53881243		X	X	Distal Intergenic	1	53904043	53905693	1651	2	163742	uc009vzj.3	24450	ENSG00000236253	SLC25A3P1	solute carrier family 25 member 3 pseudogene 1
chr1	53891518	53891667		X	X	Distal Intergenic	1	53904043	53905693	1651	2	163742	uc009vzj.3	14026	ENSG00000236253	SLC25A3P1	solute carrier family 25 member 3 pseudogene 1
chr1	54048030	54048179		X	X	"Intron (uc001cvr.1/148979, intron 3 of 9)"	1	53925072	53933158	8087	1	63948	uc001cvq.1	122958	ENSG00000143006	DMRTB1	DMRT like family B with proline rich C-terminal 1
chr1	54203703	54203852		X		Promoter (3-4kb)	1	53971906	54199877	227972	2	148979	uc001cvr.1	-3826	ENSG00000174332	GLIS1	GLIS family zinc finger 1
chr1	54204966	54205115		X		Promoter (5-6kb)	1	53971906	54199877	227972	2	148979	uc001cvr.1	-5089	ENSG00000174332	GLIS1	GLIS family zinc finger 1
chr1	54519081	54519230		X		Promoter (<=1kb)	1	54497349	54519111	21763	2	9528	uc001cwp.3	0	ENSG00000116209	TMEM59	transmembrane protein 59
chr1	54739565	54739714		X		"Intron (uc001cxe.4/23648, intron 5 of 17)"	1	54665840	54684056	18217	1	51253	uc009vzp.3	73725	ENSG00000116221	MRPL37	mitochondrial ribosomal protein L37
chr1	54740094	54740243		X		"Intron (uc001cxe.4/23648, intron 5 of 17)"	1	54665840	54684056	18217	1	51253	uc009vzp.3	74254	ENSG00000116221	MRPL37	mitochondrial ribosomal protein L37
chr1	54791671	54791820			X	"Intron (uc001cxe.4/23648, intron 4 of 17)"	1	54691104	54872068	180965	2	23648	uc001cxe.4	80248	ENSG00000157216	SSBP3	single stranded DNA binding protein 3
chr1	54849143	54849292	X			"Intron (uc001cxe.4/23648, intron 4 of 17)"	1	54691104	54872068	180965	2	23648	uc001cxe.4	22776	ENSG00000157216	SSBP3	single stranded DNA binding protein 3
chr1	54872335	54872431		X	X	Promoter (<=1kb)	1	54691104	54872068	180965	2	23648	uc001cxg.4	-267	ENSG00000157216	SSBP3	single stranded DNA binding protein 3
chr1	54873311	54873458		X	X	Promoter (1-2kb)	1	54691104	54872068	180965	2	23648	uc001cxg.4	-1243	ENSG00000157216	SSBP3	single stranded DNA binding protein 3
chr1	54875030	54875075	X	X		Promoter (2-3kb)	1	54691104	54872068	180965	2	23648	uc001cxg.4	-2962	ENSG00000157216	SSBP3	single stranded DNA binding protein 3
chr1	54875076	54875179	X	X	X	Promoter (3-4kb)	1	54691104	54872068	180965	2	23648	uc001cxg.4	-3008	ENSG00000157216	SSBP3	single stranded DNA binding protein 3
chr1	54925450	54925599		X		Distal Intergenic	1	54691104	54872068	180965	2	23648	uc001cxg.4	-53382	ENSG00000157216	SSBP3	single stranded DNA binding protein 3
chr1	54953929	54954075		X	X	Distal Intergenic	1	55007930	55076005	68076	1	26027	uc001cxj.2	-53855	ENSG00000162390	ACOT11	acyl-CoA thioesterase 11
chr1	54955156	54955305		X		Distal Intergenic	1	55007930	55076005	68076	1	26027	uc001cxj.2	-52625	ENSG00000162390	ACOT11	acyl-CoA thioesterase 11
chr1	54956084	54956233		X		Distal Intergenic	1	55007930	55076005	68076	1	26027	uc001cxj.2	-51697	ENSG00000162390	ACOT11	acyl-CoA thioesterase 11
chr1	54982339	54982488	X			Distal Intergenic	1	55007930	55076005	68076	1	26027	uc001cxj.2	-25442	ENSG00000162390	ACOT11	acyl-CoA thioesterase 11
chr1	55007914	55008063		X		Promoter (<=1kb)	1	55007930	55076005	68076	1	26027	uc001cxj.2	0	ENSG00000162390	ACOT11	acyl-CoA thioesterase 11
chr1	55013789	55013938		X		Promoter (<=1kb)	1	55013807	55064515	50709	1	26027	uc001cxk.3	0	ENSG00000162390	ACOT11	acyl-CoA thioesterase 11
chr1	55047505	55047654	X			"Intron (uc001cxj.2/26027, intron 1 of 14)"	1	55013807	55100417	86611	1	26027	uc001cxm.2	33698	ENSG00000162390	ACOT11	acyl-CoA thioesterase 11
chr1	55114883	55115032		X		Promoter (2-3kb)	1	55117461	55175939	58479	1	374977	uc001cxr.1	-2429	ENSG00000184313	MROH7	maestro heat like repeat family member 7
chr1	55217704	55217853		X		Distal Intergenic	1	55222571	55230226	7656	2	25973	uc001cxy.3	12373	ENSG00000162396	PARS2	"prolyl-tRNA synthetase 2, mitochondrial"
chr1	55230321	55230470		X		Promoter (<=1kb)	1	55222571	55230226	7656	2	25973	uc001cxy.3	-95	ENSG00000162396	PARS2	"prolyl-tRNA synthetase 2, mitochondrial"
chr1	55246959	55247108			X	"Exon (uc009vzt.1/55001, exon 7 of 7)"	1	55222571	55230226	7656	2	25973	uc001cxy.3	-16733	ENSG00000162396	PARS2	"prolyl-tRNA synthetase 2, mitochondrial"
chr1	55342690	55342839		X		Promoter (<=1kb)	1	55315300	55341720	26421	2	1718	uc010ooj.1	-970	ENSG00000116133	DHCR24	24-dehydrocholesterol reductase
chr1	55352937	55353086		X		Promoter (<=1kb)	1	55315300	55352921	37622	2	1718	uc001cyc.1	-16	ENSG00000116133	DHCR24	24-dehydrocholesterol reductase
chr1	55367463	55367612			X	Distal Intergenic	1	55315300	55352921	37622	2	1718	uc001cyc.1	-14542	ENSG00000116133	DHCR24	24-dehydrocholesterol reductase
chr1	55505009	55505141		X	X	Promoter (<=1kb)	1	55505149	55518464	13316	1	255738	uc010ool.2	-8	ENSG00000169174	PCSK9	proprotein convertase subtilisin/kexin type 9
chr1	55662841	55662851	X	X		"Intron (uc001cyg.4/23358, intron 1 of 64)"	1	55532032	55680763	148732	2	23358	uc001cyg.4	17912	ENSG00000162402	USP24	ubiquitin specific peptidase 24
chr1	55662852	55662990	X	X	X	"Intron (uc001cyg.4/23358, intron 1 of 64)"	1	55532032	55680763	148732	2	23358	uc001cyg.4	17773	ENSG00000162402	USP24	ubiquitin specific peptidase 24
chr1	55680329	55680477		X	X	Promoter (<=1kb)	1	55532032	55680763	148732	2	23358	uc001cyg.4	286	ENSG00000162402	USP24	ubiquitin specific peptidase 24
chr1	55681003	55681152		X		Promoter (<=1kb)	1	55681081	55683128	2048	1	100507634	uc021onx.1	0	NA	LOC100507634	uncharacterized LOC100507634
chr1	55698914	55699063	X	X		Distal Intergenic	1	55691314	55691396	83	1	100616272	uc021ony.1	7600	ENSG00000265822	MIR4422	microRNA 4422
chr1	55731168	55731317		X	X	Distal Intergenic	1	55691314	55691396	83	1	100616272	uc021ony.1	39854	ENSG00000265822	MIR4422	microRNA 4422
chr1	55996621	55996770	X			Distal Intergenic	1	55691314	55691396	83	1	100616272	uc021ony.1	305307	ENSG00000265822	MIR4422	microRNA 4422
chr1	56021826	56021975		X		Distal Intergenic	1	55691314	55691396	83	1	100616272	uc021ony.1	330512	ENSG00000265822	MIR4422	microRNA 4422
chr1	56089652	56089783		X	X	"Intron (uc001cyi.1/uc001cyi.1, intron 2 of 2)"	1	55691314	55691396	83	1	100616272	uc021ony.1	398338	ENSG00000265822	MIR4422	microRNA 4422
chr1	56139218	56139367	X	X		"Intron (uc001cyi.1/uc001cyi.1, intron 2 of 2)"	1	55691314	55691396	83	1	100616272	uc021ony.1	447904	ENSG00000265822	MIR4422	microRNA 4422
chr1	56170394	56170498	X		X	"Intron (uc001cyi.1/uc001cyi.1, intron 2 of 2)"	1	55691314	55691396	83	1	100616272	uc021ony.1	479080	ENSG00000265822	MIR4422	microRNA 4422
chr1	56226720	56226869	X	X		Distal Intergenic	1	55691314	55691396	83	1	100616272	uc021ony.1	535406	ENSG00000265822	MIR4422	microRNA 4422
chr1	56252195	56252344	X	X		Distal Intergenic	1	55691314	55691396	83	1	100616272	uc021ony.1	560881	ENSG00000265822	MIR4422	microRNA 4422
chr1	56279510	56279659	X	X		Distal Intergenic	1	55691314	55691396	83	1	100616272	uc021ony.1	588196	ENSG00000265822	MIR4422	microRNA 4422
chr1	56293661	56293810	X			Distal Intergenic	1	55691314	55691396	83	1	100616272	uc021ony.1	602347	ENSG00000265822	MIR4422	microRNA 4422
chr1	56301795	56301944		X		Distal Intergenic	1	55691314	55691396	83	1	100616272	uc021ony.1	610481	ENSG00000265822	MIR4422	microRNA 4422
chr1	56409558	56409707		X		Distal Intergenic	1	56960419	57045257	84839	2	8613	uc001cyj.2	635550	ENSG00000162407	PLPP3	phospholipid phosphatase 3
chr1	56498199	56498348	X	X		Distal Intergenic	1	56960419	57045257	84839	2	8613	uc001cyj.2	546909	ENSG00000162407	PLPP3	phospholipid phosphatase 3
chr1	56636680	56636829	X			Distal Intergenic	1	56960419	57045257	84839	2	8613	uc001cyj.2	408428	ENSG00000162407	PLPP3	phospholipid phosphatase 3
chr1	56654982	56655131			X	Distal Intergenic	1	56960419	57045257	84839	2	8613	uc001cyj.2	390126	ENSG00000162407	PLPP3	phospholipid phosphatase 3
chr1	56841179	56841328		X		Distal Intergenic	1	56960419	57045257	84839	2	8613	uc001cyj.2	203929	ENSG00000162407	PLPP3	phospholipid phosphatase 3
chr1	56862454	56862588		X	X	Distal Intergenic	1	56960419	57045257	84839	2	8613	uc001cyj.2	182669	ENSG00000162407	PLPP3	phospholipid phosphatase 3
chr1	56863697	56863839		X	X	Distal Intergenic	1	56960419	57045257	84839	2	8613	uc001cyj.2	181418	ENSG00000162407	PLPP3	phospholipid phosphatase 3
chr1	56882113	56882244	X	X	X	Distal Intergenic	1	56960419	57045257	84839	2	8613	uc001cyj.2	163013	ENSG00000162407	PLPP3	phospholipid phosphatase 3
chr1	56882245	56882262	X	X		Distal Intergenic	1	56960419	57045257	84839	2	8613	uc001cyj.2	162995	ENSG00000162407	PLPP3	phospholipid phosphatase 3
chr1	56902734	56902881		X	X	Distal Intergenic	1	56960419	57045257	84839	2	8613	uc001cyj.2	142376	ENSG00000162407	PLPP3	phospholipid phosphatase 3
chr1	56943022	56943171	X	X		Distal Intergenic	1	56960419	57045257	84839	2	8613	uc001cyj.2	102086	ENSG00000162407	PLPP3	phospholipid phosphatase 3
chr1	56960068	56960217		X		Downstream (<1kb)	1	56960419	57045257	84839	2	8613	uc001cyj.2	85040	ENSG00000162407	PLPP3	phospholipid phosphatase 3
chr1	56986983	56987001	X	X		"Intron (uc001cyj.2/8613, intron 4 of 5)"	1	56960419	57045257	84839	2	8613	uc001cyj.2	58256	ENSG00000162407	PLPP3	phospholipid phosphatase 3
chr1	56987002	56987132	X	X	X	"Intron (uc001cyj.2/8613, intron 4 of 5)"	1	56960419	57045257	84839	2	8613	uc001cyj.2	58125	ENSG00000162407	PLPP3	phospholipid phosphatase 3
chr1	57035437	57035586	X			"Intron (uc001cyj.2/8613, intron 1 of 5)"	1	56960419	57045257	84839	2	8613	uc001cyj.2	9671	ENSG00000162407	PLPP3	phospholipid phosphatase 3
chr1	57217718	57217867	X	X	X	"Intron (uc001cyl.3/199920, intron 4 of 13)"	1	57184477	57227686	43210	2	199920	uc001cyl.3	9819	ENSG00000187889	FYB2	FYN binding protein 2
chr1	57218532	57218558	X	X		"Intron (uc001cyl.3/199920, intron 4 of 13)"	1	57184477	57227686	43210	2	199920	uc001cyl.3	9128	ENSG00000187889	FYB2	FYN binding protein 2
chr1	57218559	57218681	X	X	X	"Intron (uc001cyl.3/199920, intron 4 of 13)"	1	57184477	57227686	43210	2	199920	uc001cyl.3	9005	ENSG00000187889	FYB2	FYN binding protein 2
chr1	57277108	57277257		X		"Intron (uc001cym.4/199920, intron 1 of 19)"	1	57184477	57285369	100893	2	199920	uc001cym.4	8112	ENSG00000187889	FYB2	FYN binding protein 2
chr1	57476245	57476389	X	X	X	3' UTR	1	57394883	57431688	36806	2	732	uc010ooo.2	-44557	ENSG00000021852	C8B	complement C8 beta chain
chr1	57476390	57476394	X	X		"Exon (uc001cyq.1/1600, exon 13 of 14)"	1	57394883	57431688	36806	2	732	uc010ooo.2	-44702	ENSG00000021852	C8B	complement C8 beta chain
chr1	57532771	57532920		X	X	"Intron (uc001cyq.1/1600, intron 5 of 13)"	1	57394883	57431688	36806	2	732	uc010ooo.2	-101083	ENSG00000021852	C8B	complement C8 beta chain
chr1	57597061	57597210		X		"Intron (uc001cyq.1/1600, intron 3 of 13)"	1	57463579	57756838	293260	2	1600	uc001cyq.1	159628	ENSG00000173406	DAB1	"DAB1, reelin adaptor protein"
chr1	57684508	57684657	X	X		"Intron (uc001cyq.1/1600, intron 1 of 13)"	1	57463579	57756838	293260	2	1600	uc001cyq.1	72181	ENSG00000173406	DAB1	"DAB1, reelin adaptor protein"
chr1	57813813	57813962		X		"Intron (uc001cys.1/1600, intron 3 of 16)"	1	57463579	57773037	309459	2	1600	uc009vzw.1	-40776	ENSG00000173406	DAB1	"DAB1, reelin adaptor protein"
chr1	57847609	57847758		X		"Intron (uc001cys.1/1600, intron 3 of 16)"	1	57476353	57888872	412520	2	1600	uc009vzx.1	41114	ENSG00000173406	DAB1	"DAB1, reelin adaptor protein"
chr1	57874797	57874946		X		"Intron (uc001cys.1/1600, intron 3 of 16)"	1	57476353	57888872	412520	2	1600	uc009vzx.1	13926	ENSG00000173406	DAB1	"DAB1, reelin adaptor protein"
chr1	57889679	57889813		X	X	Promoter (<=1kb)	1	57476353	57888872	412520	2	1600	uc009vzx.1	-807	ENSG00000173406	DAB1	"DAB1, reelin adaptor protein"
chr1	57890363	57890512		X		Promoter (1-2kb)	1	57476353	57888872	412520	2	1600	uc009vzx.1	-1491	ENSG00000173406	DAB1	"DAB1, reelin adaptor protein"
chr1	57913341	57913490		X		"Intron (uc001cys.1/1600, intron 3 of 16)"	1	57476353	57888872	412520	2	1600	uc009vzx.1	-24469	ENSG00000173406	DAB1	"DAB1, reelin adaptor protein"
chr1	58019572	58019720		X	X	"Intron (uc001cys.1/1600, intron 3 of 16)"	1	57476353	57888872	412520	2	1600	uc009vzx.1	-130700	ENSG00000173406	DAB1	"DAB1, reelin adaptor protein"
chr1	58047892	58048041			X	"Intron (uc001cys.1/1600, intron 3 of 16)"	1	57476353	57888872	412520	2	1600	uc009vzx.1	-159020	ENSG00000173406	DAB1	"DAB1, reelin adaptor protein"
chr1	58057689	58057838		X		"Intron (uc001cys.1/1600, intron 3 of 16)"	1	57476353	57888872	412520	2	1600	uc009vzx.1	-168817	ENSG00000173406	DAB1	"DAB1, reelin adaptor protein"
chr1	58062816	58062963		X	X	"Intron (uc001cys.1/1600, intron 3 of 16)"	1	57476353	57888872	412520	2	1600	uc009vzx.1	-173944	ENSG00000173406	DAB1	"DAB1, reelin adaptor protein"
chr1	58085563	58085701	X	X	X	"Intron (uc001cys.1/1600, intron 3 of 16)"	1	57476353	57888872	412520	2	1600	uc009vzx.1	-196691	ENSG00000173406	DAB1	"DAB1, reelin adaptor protein"
chr1	58085702	58085712	X	X		"Intron (uc001cys.1/1600, intron 3 of 16)"	1	57476353	57888872	412520	2	1600	uc009vzx.1	-196830	ENSG00000173406	DAB1	"DAB1, reelin adaptor protein"
chr1	58086369	58086516		X	X	"Intron (uc001cys.1/1600, intron 3 of 16)"	1	57476353	57888872	412520	2	1600	uc009vzx.1	-197497	ENSG00000173406	DAB1	"DAB1, reelin adaptor protein"
chr1	58740236	58740385		X		"Intron (uc001cyt.1/1600, intron 4 of 20)"	1	57463579	58716211	1252633	2	1600	uc001cys.1	-24025	ENSG00000173406	DAB1	"DAB1, reelin adaptor protein"
chr1	58902666	58902794	X	X	X	"Intron (uc001cyt.1/1600, intron 3 of 20)"	1	58939504	59004982	65479	2	115209	uc001cyx.1	102188	ENSG00000162600	OMA1	OMA1 zinc metallopeptidase
chr1	58902795	58902815	X	X		"Intron (uc001cyt.1/1600, intron 3 of 20)"	1	58939504	59004982	65479	2	115209	uc001cyx.1	102167	ENSG00000162600	OMA1	OMA1 zinc metallopeptidase
chr1	58913652	58913801		X		"Intron (uc001cyt.1/1600, intron 3 of 20)"	1	58939504	59004982	65479	2	115209	uc001cyx.1	91181	ENSG00000162600	OMA1	OMA1 zinc metallopeptidase
chr1	58928933	58929043		X	X	"Intron (uc001cyt.1/1600, intron 3 of 20)"	1	58939504	59004982	65479	2	115209	uc001cyx.1	75939	ENSG00000162600	OMA1	OMA1 zinc metallopeptidase
chr1	58932717	58932864	X	X	X	"Intron (uc001cyt.1/1600, intron 3 of 20)"	1	58939504	59004982	65479	2	115209	uc001cyx.1	72118	ENSG00000162600	OMA1	OMA1 zinc metallopeptidase
chr1	58932865	58932866	X	X		"Intron (uc001cyt.1/1600, intron 3 of 20)"	1	58939504	59004982	65479	2	115209	uc001cyx.1	72116	ENSG00000162600	OMA1	OMA1 zinc metallopeptidase
chr1	59012369	59012518		X		Promoter (<=1kb)	1	58946391	59012446	66056	2	115209	uc001cyy.3	0	ENSG00000162600	OMA1	OMA1 zinc metallopeptidase
chr1	59034657	59034806		X		Distal Intergenic	1	59041095	59043166	2072	2	4070	uc001cyz.4	8360	ENSG00000184292	TACSTD2	tumor associated calcium signal transducer 2
chr1	59074414	59074563	X	X		Distal Intergenic	1	59041095	59043166	2072	2	4070	uc001cyz.4	-31248	ENSG00000184292	TACSTD2	tumor associated calcium signal transducer 2
chr1	59085985	59086134			X	Distal Intergenic	1	59041095	59043166	2072	2	4070	uc001cyz.4	-42819	ENSG00000184292	TACSTD2	tumor associated calcium signal transducer 2
chr1	59161033	59161182			X	"Intron (uc009wab.2/114803, intron 1 of 19)"	1	59120411	59165747	45337	2	114803	uc009wab.2	4565	ENSG00000162601	MYSM1	"Myb like, SWIRM and MPN domains 1"
chr1	59165681	59165830		X		Promoter (<=1kb)	1	59120411	59165747	45337	2	114803	uc009wab.2	0	ENSG00000162601	MYSM1	"Myb like, SWIRM and MPN domains 1"
chr1	59220618	59220767		X		Distal Intergenic	1	59246463	59249785	3323	2	3725	uc001cze.3	29018	ENSG00000177606	JUN	"Jun proto-oncogene, AP-1 transcription factor subunit"
chr1	59238895	59239044	X			Distal Intergenic	1	59246463	59249785	3323	2	3725	uc001cze.3	10741	ENSG00000177606	JUN	"Jun proto-oncogene, AP-1 transcription factor subunit"
chr1	59249712	59249861		X		Promoter (<=1kb)	1	59246463	59249785	3323	2	3725	uc001cze.3	0	ENSG00000177606	JUN	"Jun proto-oncogene, AP-1 transcription factor subunit"
chr1	59351113	59351247	X		X	"Intron (uc001czf.2/100131060, intron 1 of 3)"	1	59250823	59365384	114562	1	100131060	uc010oop.1	100290	ENSG00000234807	LINC01135	long intergenic non-protein coding RNA 1135
chr1	59362371	59362520		X		"Intron (uc001czf.2/100131060, intron 3 of 3)"	1	59250823	59365384	114562	1	100131060	uc010oop.1	111548	ENSG00000234807	LINC01135	long intergenic non-protein coding RNA 1135
chr1	59364782	59364931	X	X		"Exon (uc001czf.2/100131060, exon 4 of 4)"	1	59250823	59365384	114562	1	100131060	uc010oop.1	113959	ENSG00000234807	LINC01135	long intergenic non-protein coding RNA 1135
chr1	59456595	59456733		X	X	Distal Intergenic	1	59597608	59612479	14872	2	729467	uc010ooq.2	155746	ENSG00000224609	HSD52	uncharacterized LOC729467
chr1	59474364	59474513		X		Distal Intergenic	1	59597608	59612479	14872	2	729467	uc010ooq.2	137966	ENSG00000224609	HSD52	uncharacterized LOC729467
chr1	59537031	59537180			X	Distal Intergenic	1	59597608	59612479	14872	2	729467	uc010ooq.2	75299	ENSG00000224609	HSD52	uncharacterized LOC729467
chr1	59543822	59543943		X	X	Distal Intergenic	1	59597608	59612479	14872	2	729467	uc010ooq.2	68536	ENSG00000224609	HSD52	uncharacterized LOC729467
chr1	59605223	59605372		X		"Intron (uc010ooq.2/729467, intron 1 of 2)"	1	59597608	59612479	14872	2	729467	uc010ooq.2	7107	ENSG00000224609	HSD52	uncharacterized LOC729467
chr1	59690060	59690209		X		Distal Intergenic	1	59762625	60092526	329902	1	55277	uc001czg.2	-72416	ENSG00000172456	FGGY	FGGY carbohydrate kinase domain containing
chr1	59785375	59785521		X	X	"Intron (uc001czg.2/55277, intron 1 of 8)"	1	59775750	60228402	452653	1	55277	uc001czl.4	9625	ENSG00000172456	FGGY	FGGY carbohydrate kinase domain containing
chr1	59887280	59887429	X	X		"Intron (uc001czg.2/55277, intron 4 of 8)"	1	59981301	60228402	247102	1	55277	uc001czm.5	-93872	ENSG00000172456	FGGY	FGGY carbohydrate kinase domain containing
chr1	59912173	59912322	X	X		"Intron (uc001czg.2/55277, intron 4 of 8)"	1	59981301	60228402	247102	1	55277	uc001czm.5	-68979	ENSG00000172456	FGGY	FGGY carbohydrate kinase domain containing
chr1	60019828	60019977		X		5' UTR	1	59981301	60228402	247102	1	55277	uc001czm.5	38527	ENSG00000172456	FGGY	FGGY carbohydrate kinase domain containing
chr1	60142365	60142514		X		"Intron (uc001czh.2/55277, intron 15 of 16)"	1	60198899	60198968	70	2	100616409	uc021oob.1	56454	ENSG00000266150	MIR4711	microRNA 4711
chr1	60235224	60235373		X		Distal Intergenic	1	60198899	60198968	70	2	100616409	uc021oob.1	-36256	ENSG00000266150	MIR4711	microRNA 4711
chr1	60518497	60518646		X		"Intron (uc001czs.2/127795, intron 3 of 11)"	1	60454824	60539442	84619	2	127795	uc001czs.2	20796	ENSG00000162598	C1orf87	chromosome 1 open reading frame 87
chr1	60785263	60785412		X		Distal Intergenic	1	60454824	60539442	84619	2	127795	uc001czs.2	-245821	ENSG00000162598	C1orf87	chromosome 1 open reading frame 87
chr1	60956141	60956290		X		Distal Intergenic	1	60454824	60539442	84619	2	127795	uc001czs.2	-416699	ENSG00000162598	C1orf87	chromosome 1 open reading frame 87
chr1	61352775	61352924		X		Distal Intergenic	1	61542946	61928460	385515	1	4774	uc001czy.3	-190022	ENSG00000162599	NFIA	nuclear factor I A
chr1	61361510	61361659		X		Distal Intergenic	1	61542946	61928460	385515	1	4774	uc001czy.3	-181287	ENSG00000162599	NFIA	nuclear factor I A
chr1	61382006	61382008	X	X		Distal Intergenic	1	61542946	61928460	385515	1	4774	uc001czy.3	-160938	ENSG00000162599	NFIA	nuclear factor I A
chr1	61382009	61382155	X	X	X	Distal Intergenic	1	61542946	61928460	385515	1	4774	uc001czy.3	-160791	ENSG00000162599	NFIA	nuclear factor I A
chr1	61426570	61426719		X		"Intron (uc001czu.3/uc001czu.3, intron 2 of 6)"	1	61542946	61928460	385515	1	4774	uc001czy.3	-116227	ENSG00000162599	NFIA	nuclear factor I A
chr1	61542649	61542798		X		Promoter (<=1kb)	1	61542946	61928460	385515	1	4774	uc001czy.3	-148	ENSG00000162599	NFIA	nuclear factor I A
chr1	61902610	61902759		X		"Intron (uc001czy.3/4774, intron 10 of 10)"	1	61872234	61928460	56227	1	4774	uc009wae.3	30376	ENSG00000162599	NFIA	nuclear factor I A
chr1	62338025	62338174		X		"Intron (uc009waf.1/10207, intron 20 of 35)"	1	62271120	62629176	358057	1	10207	uc001dac.3	66905	ENSG00000132849	PATJ	"PATJ, crumbs cell polarity complex component"
chr1	62339362	62339511	X	X		"Intron (uc009waf.1/10207, intron 20 of 35)"	1	62271120	62629176	358057	1	10207	uc001dac.3	68242	ENSG00000132849	PATJ	"PATJ, crumbs cell polarity complex component"
chr1	62448034	62448183	X			"Intron (uc009waf.1/10207, intron 27 of 35)"	1	62439040	62580582	141543	1	10207	uc010oou.1	8994	ENSG00000132849	PATJ	"PATJ, crumbs cell polarity complex component"
chr1	62499679	62499828		X		"Intron (uc009waf.1/10207, intron 29 of 35)"	1	62439040	62580582	141543	1	10207	uc010oou.1	60639	ENSG00000132849	PATJ	"PATJ, crumbs cell polarity complex component"
chr1	62555842	62555991		X		"Intron (uc009waf.1/10207, intron 33 of 35)"	1	62660474	62678001	17528	1	54596	uc001dae.4	-104483	ENSG00000240563	L1TD1	LINE1 type transposase domain containing 1
chr1	62643427	62643576	X	X		"Intron (uc009wag.3/10207, intron 16 of 16)"	1	62660474	62678001	17528	1	54596	uc001dae.4	-16898	ENSG00000240563	L1TD1	LINE1 type transposase domain containing 1
chr1	62695763	62695912	X	X		Distal Intergenic	1	62701837	62729096	27260	2	163782	uc001daf.4	33184	ENSG00000132854	KANK4	KN motif and ankyrin repeat domains 4
chr1	62744969	62745118	X			Promoter (6-7kb)	1	62701837	62738463	36627	2	163782	uc001dag.4	-6506	ENSG00000132854	KANK4	KN motif and ankyrin repeat domains 4
chr1	62902062	62902211		X		Promoter (<=1kb)	1	62901975	62917475	15501	1	7398	uc001dak.2	87	ENSG00000162607	USP1	ubiquitin specific peptidase 1
chr1	63153442	63153591		X		Promoter (<=1kb)	1	62920397	63154039	233643	2	85440	uc001dan.4	448	ENSG00000116641	DOCK7	dedicator of cytokinesis 7
chr1	63225785	63225786	X	X		Distal Intergenic	1	63249777	63330941	81165	1	84938	uc001dat.3	-23991	ENSG00000125703	ATG4C	autophagy related 4C cysteine peptidase
chr1	63225787	63225934	X	X	X	Distal Intergenic	1	63249777	63330941	81165	1	84938	uc001dat.3	-23843	ENSG00000125703	ATG4C	autophagy related 4C cysteine peptidase
chr1	63226206	63226245	X	X		Distal Intergenic	1	63249777	63330941	81165	1	84938	uc001dat.3	-23532	ENSG00000125703	ATG4C	autophagy related 4C cysteine peptidase
chr1	63226246	63226355	X	X	X	Distal Intergenic	1	63249777	63330941	81165	1	84938	uc001dat.3	-23422	ENSG00000125703	ATG4C	autophagy related 4C cysteine peptidase
chr1	63240773	63240922		X		Promoter (8-9kb)	1	63249777	63330941	81165	1	84938	uc001dat.3	-8855	ENSG00000125703	ATG4C	autophagy related 4C cysteine peptidase
chr1	63249666	63249815		X		Promoter (<=1kb)	1	63249777	63330941	81165	1	84938	uc001dat.3	0	ENSG00000125703	ATG4C	autophagy related 4C cysteine peptidase
chr1	63466455	63466604		X		Distal Intergenic	1	63249777	63330941	81165	1	84938	uc001dau.3	216678	ENSG00000125703	ATG4C	autophagy related 4C cysteine peptidase
chr1	63509303	63509452		X		Distal Intergenic	1	63249777	63330941	81165	1	84938	uc001dau.3	259526	ENSG00000125703	ATG4C	autophagy related 4C cysteine peptidase
chr1	63833162	63833311		X		Promoter (<=1kb)	1	63833261	63904233	70973	1	29929	uc021oof.1	0	ENSG00000088035	ALG6	"ALG6, alpha-1,3-glucosyltransferase"
chr1	64040186	64040235	X	X	X	Distal Intergenic	1	64058947	64125916	66970	1	5236	uc001dbh.3	-18712	ENSG00000079739	PGM1	phosphoglucomutase 1
chr1	64040236	64040335	X	X		Distal Intergenic	1	64058947	64125916	66970	1	5236	uc001dbh.3	-18612	ENSG00000079739	PGM1	phosphoglucomutase 1
chr1	64066046	64066195	X	X		"Intron (uc001dbh.3/5236, intron 1 of 10)"	1	64059480	64125916	66437	1	5236	uc010ooy.2	6566	ENSG00000079739	PGM1	phosphoglucomutase 1
chr1	64078839	64078988	X	X	X	Promoter (9-10kb)	1	64088887	64125916	37030	1	5236	uc010ooz.2	-9899	ENSG00000079739	PGM1	phosphoglucomutase 1
chr1	64195928	64196077		X		Distal Intergenic	1	64239690	64609052	369363	1	4919	uc001dbi.4	-43613	ENSG00000185483	ROR1	receptor tyrosine kinase like orphan receptor 1
chr1	64256012	64256107		X	X	"Intron (uc001dbi.4/4919, intron 1 of 6)"	1	64239690	64647179	407490	1	4919	uc001dbj.3	16322	ENSG00000185483	ROR1	receptor tyrosine kinase like orphan receptor 1
chr1	64309067	64309189		X	X	"Intron (uc001dbi.4/4919, intron 1 of 6)"	1	64239690	64647179	407490	1	4919	uc001dbj.3	69377	ENSG00000185483	ROR1	receptor tyrosine kinase like orphan receptor 1
chr1	64378519	64378664		X	X	"Intron (uc001dbi.4/4919, intron 1 of 6)"	1	64239690	64647179	407490	1	4919	uc001dbj.3	138829	ENSG00000185483	ROR1	receptor tyrosine kinase like orphan receptor 1
chr1	64472422	64472495	X	X		"Intron (uc001dbi.4/4919, intron 1 of 6)"	1	64669490	64710027	40538	1	148581	uc001dbn.1	-196995	ENSG00000177414	UBE2U	ubiquitin conjugating enzyme E2 U
chr1	64472496	64472571	X	X	X	"Intron (uc001dbi.4/4919, intron 1 of 6)"	1	64669490	64710027	40538	1	148581	uc001dbn.1	-196919	ENSG00000177414	UBE2U	ubiquitin conjugating enzyme E2 U
chr1	64615190	64615337		X	X	"Intron (uc001dbj.3/4919, intron 7 of 8)"	1	64669490	64710027	40538	1	148581	uc001dbn.1	-54153	ENSG00000177414	UBE2U	ubiquitin conjugating enzyme E2 U
chr1	64628030	64628179		X		"Intron (uc001dbj.3/4919, intron 8 of 8)"	1	64669490	64710027	40538	1	148581	uc001dbn.1	-41311	ENSG00000177414	UBE2U	ubiquitin conjugating enzyme E2 U
chr1	64695153	64695300	X	X	X	"Intron (uc001dbn.1/148581, intron 6 of 8)"	1	64669490	64710027	40538	1	148581	uc001dbn.1	25663	ENSG00000177414	UBE2U	ubiquitin conjugating enzyme E2 U
chr1	64695301	64695302	X	X		"Intron (uc001dbn.1/148581, intron 6 of 8)"	1	64669490	64710027	40538	1	148581	uc001dbn.1	25811	ENSG00000177414	UBE2U	ubiquitin conjugating enzyme E2 U
chr1	64696922	64697071	X	X		"Intron (uc001dbn.1/148581, intron 6 of 8)"	1	64669490	64710027	40538	1	148581	uc001dbn.1	27432	ENSG00000177414	UBE2U	ubiquitin conjugating enzyme E2 U
chr1	64747639	64747788		X		Distal Intergenic	1	64669490	64710027	40538	1	148581	uc001dbn.1	78149	ENSG00000177414	UBE2U	ubiquitin conjugating enzyme E2 U
chr1	64809319	64809468		X		Distal Intergenic	1	64936476	65158741	222266	1	57685	uc001dbo.1	-127008	ENSG00000158966	CACHD1	cache domain containing 1
chr1	64823270	64823419		X		Distal Intergenic	1	64936476	65158741	222266	1	57685	uc001dbo.1	-113057	ENSG00000158966	CACHD1	cache domain containing 1
chr1	64889351	64889500		X		Distal Intergenic	1	64936476	65158741	222266	1	57685	uc001dbo.1	-46976	ENSG00000158966	CACHD1	cache domain containing 1
chr1	64917069	64917160	X	X	X	Distal Intergenic	1	64936476	65158741	222266	1	57685	uc001dbo.1	-19316	ENSG00000158966	CACHD1	cache domain containing 1
chr1	64917161	64917218	X	X		Distal Intergenic	1	64936476	65158741	222266	1	57685	uc001dbo.1	-19258	ENSG00000158966	CACHD1	cache domain containing 1
chr1	64935663	64935812		X		Promoter (<=1kb)	1	64936476	65158741	222266	1	57685	uc001dbo.1	-664	ENSG00000158966	CACHD1	cache domain containing 1
chr1	64938617	64938766		X		Promoter (2-3kb)	1	64936476	65158741	222266	1	57685	uc001dbo.1	2141	ENSG00000158966	CACHD1	cache domain containing 1
chr1	64971411	64971560		X		Promoter (<=1kb)	1	64971597	65158741	187145	1	57685	uc001dbp.1	-37	ENSG00000158966	CACHD1	cache domain containing 1
chr1	64983529	64983678		X		"Intron (uc001dbo.1/57685, intron 1 of 26)"	1	64971597	65158741	187145	1	57685	uc001dbp.1	11932	ENSG00000158966	CACHD1	cache domain containing 1
chr1	64984598	64984726	X	X	X	"Intron (uc001dbo.1/57685, intron 1 of 26)"	1	64971597	65158741	187145	1	57685	uc001dbp.1	13001	ENSG00000158966	CACHD1	cache domain containing 1
chr1	64984727	64984747	X	X		"Intron (uc001dbo.1/57685, intron 1 of 26)"	1	64971597	65158741	187145	1	57685	uc001dbp.1	13130	ENSG00000158966	CACHD1	cache domain containing 1
chr1	65038431	65038580	X	X		Promoter (6-7kb)	1	65045530	65045604	75	1	100616338	uc021ooh.1	-6950	ENSG00000264470	MIR4794	microRNA 4794
chr1	65061939	65062086		X	X	"Intron (uc001dbo.1/57685, intron 3 of 26)"	1	65045530	65045604	75	1	100616338	uc021ooh.1	16409	ENSG00000264470	MIR4794	microRNA 4794
chr1	65063829	65063978		X		"Intron (uc001dbo.1/57685, intron 3 of 26)"	1	65045530	65045604	75	1	100616338	uc021ooh.1	18299	ENSG00000264470	MIR4794	microRNA 4794
chr1	65432116	65432265		X		Promoter (<=1kb)	1	65298906	65432187	133282	2	3716	uc001dbu.1	0	ENSG00000162434	JAK1	Janus kinase 1
chr1	65468276	65468425		X		Distal Intergenic	1	65298906	65432619	133714	2	3716	uc009wam.1	-35657	ENSG00000162434	JAK1	Janus kinase 1
chr1	65533340	65533489		X		Promoter (9-10kb)	1	65524117	65524191	75	2	406893	uc001dbx.3	-9149	ENSG00000199135	MIR101-1	microRNA 101-1
chr1	65556275	65556424		X		Distal Intergenic	1	65524117	65524191	75	2	406893	uc001dbx.3	-32084	ENSG00000199135	MIR101-1	microRNA 101-1
chr1	65614646	65614795		X		Promoter (<=1kb)	1	65613850	65697828	83979	1	205	uc001dca.3	796	ENSG00000162433	AK4	adenylate kinase 4
chr1	65695648	65695651	X	X		3' UTR	1	65720148	65858548	138401	1	9829	uc001dcc.1	-24497	ENSG00000116675	DNAJC6	DnaJ heat shock protein family (Hsp40) member C6
chr1	65695652	65695797	X	X	X	3' UTR	1	65720148	65858548	138401	1	9829	uc001dcc.1	-24351	ENSG00000116675	DNAJC6	DnaJ heat shock protein family (Hsp40) member C6
chr1	65720113	65720262		X		Promoter (<=1kb)	1	65720148	65858548	138401	1	9829	uc001dcc.1	0	ENSG00000116675	DNAJC6	DnaJ heat shock protein family (Hsp40) member C6
chr1	65775040	65775189		X		Promoter (<=1kb)	1	65775218	65881552	106335	1	9829	uc001dce.2	-29	ENSG00000116675	DNAJC6	DnaJ heat shock protein family (Hsp40) member C6
chr1	65885981	65886130		X		Promoter (<=1kb)	1	65886131	66096095	209965	1	3953	uc001dcg.3	-1	ENSG00000116678	LEPR	leptin receptor
chr1	65909914	65910063		X		"Intron (uc001dcg.3/3953, intron 2 of 19)"	1	65886131	65901690	15560	1	54741	uc009wap.3	23783	ENSG00000213625	LEPROT	leptin receptor overlapping transcript
chr1	66087558	66087707		X		"Intron (uc001dcg.3/3953, intron 18 of 19)"	1	65991372	66101111	109740	1	3953	uc001dck.3	96186	ENSG00000116678	LEPR	leptin receptor
chr1	66153560	66153709		X		Distal Intergenic	1	66258193	66840262	582070	1	5142	uc001dcn.3	-104484	ENSG00000184588	PDE4B	phosphodiesterase 4B
chr1	66622348	66622497		X		"Intron (uc001dcn.3/5142, intron 3 of 16)"	1	66458390	66840262	381873	1	5142	uc001dcp.3	163958	ENSG00000184588	PDE4B	phosphodiesterase 4B
chr1	66744624	66744773		X		"Intron (uc001dcn.3/5142, intron 7 of 16)"	1	66797793	66840262	42470	1	5142	uc001dcq.3	-53020	ENSG00000184588	PDE4B	phosphodiesterase 4B
chr1	66917987	66918021	X	X	X	Distal Intergenic	1	66999825	67210768	210944	1	84251	uc001dcr.3	-81804	ENSG00000118473	SGIP1	SH3 domain GRB2 like endophilin interacting protein 1
chr1	66918022	66918136	X	X		Distal Intergenic	1	66999825	67210768	210944	1	84251	uc001dcr.3	-81689	ENSG00000118473	SGIP1	SH3 domain GRB2 like endophilin interacting protein 1
chr1	67018130	67018263		X	X	"Intron (uc001dcr.3/84251, intron 1 of 24)"	1	66999825	67210768	210944	1	84251	uc001dcr.3	18305	ENSG00000118473	SGIP1	SH3 domain GRB2 like endophilin interacting protein 1
chr1	67150049	67150198		X		"Intron (uc001dcr.3/84251, intron 15 of 24)"	1	67160377	67210768	50392	1	84251	uc001dcu.3	-10179	ENSG00000118473	SGIP1	SH3 domain GRB2 like endophilin interacting protein 1
chr1	67156809	67156958		X		Promoter (3-4kb)	1	67160377	67210768	50392	1	84251	uc001dcu.3	-3419	ENSG00000118473	SGIP1	SH3 domain GRB2 like endophilin interacting protein 1
chr1	67313911	67314060		X		"Intron (uc009waw.3/79819, intron 3 of 11)"	1	67278572	67340620	62049	2	79819	uc009waw.3	26560	ENSG00000152763	WDR78	WD repeat domain 78
chr1	67382084	67382233		X		"Intron (uc001dcx.3/79819, intron 1 of 16)"	1	67278572	67390570	111999	2	79819	uc001dcx.3	8337	ENSG00000152763	WDR78	WD repeat domain 78
chr1	67390984	67391133		X		Promoter (<=1kb)	1	67390578	67454302	63725	1	57708	uc010opg.1	406	ENSG00000198160	MIER1	MIER1 transcriptional regulator
chr1	67395861	67396010		X		Promoter (<=1kb)	1	67395926	67454302	58377	1	57708	uc001ddi.2	0	ENSG00000198160	MIER1	MIER1 transcriptional regulator
chr1	67519986	67520135		X		Promoter (<=1kb)	1	67465015	67520080	55066	2	23169	uc001ddk.2	0	ENSG00000116704	SLC35D1	solute carrier family 35 member D1
chr1	67624384	67624533		X		Promoter (7-8kb)	1	67632169	67725650	93482	1	149233	uc001ddo.3	-7636	ENSG00000162594	IL23R	interleukin 23 receptor
chr1	67624942	67625091	X	X		Promoter (7-8kb)	1	67632169	67725650	93482	1	149233	uc001ddo.3	-7078	ENSG00000162594	IL23R	interleukin 23 receptor
chr1	67732627	67732776		X		Distal Intergenic	1	67773047	67862583	89537	1	3595	uc001ddu.3	-40271	ENSG00000081985	IL12RB2	interleukin 12 receptor subunit beta 2
chr1	67842133	67842282		X		"Intron (uc001ddu.3/3595, intron 12 of 15)"	1	67873493	67896123	22631	2	26135	uc001ddv.3	53841	ENSG00000142864	SERBP1	SERPINE1 mRNA binding protein 1
chr1	67855612	67855755		X	X	"Exon (uc001ddu.3/3595, exon 15 of 16)"	1	67873493	67896123	22631	2	26135	uc001ddv.3	40368	ENSG00000142864	SERBP1	SERPINE1 mRNA binding protein 1
chr1	67896101	67896250		X		Promoter (<=1kb)	1	67873493	67896123	22631	2	26135	uc001ddv.3	0	ENSG00000142864	SERBP1	SERPINE1 mRNA binding protein 1
chr1	67905069	67905218		X		Promoter (8-9kb)	1	67873493	67896123	22631	2	26135	uc001ddy.3	-8946	ENSG00000142864	SERBP1	SERPINE1 mRNA binding protein 1
chr1	67981130	67981279		X		Distal Intergenic	1	67873493	67896123	22631	2	26135	uc001ddy.3	-85007	ENSG00000142864	SERBP1	SERPINE1 mRNA binding protein 1
chr1	68005951	68005956		X	X	Distal Intergenic	1	67873493	67896123	22631	2	26135	uc001ddy.3	-109828	ENSG00000142864	SERBP1	SERPINE1 mRNA binding protein 1
chr1	68067291	68067434		X	X	Distal Intergenic	1	68150860	68154021	3162	1	1647	uc001ddz.2	-83426	ENSG00000116717	GADD45A	growth arrest and DNA damage inducible alpha
chr1	68070562	68070711		X		Distal Intergenic	1	68150860	68154021	3162	1	1647	uc001ddz.2	-80149	ENSG00000116717	GADD45A	growth arrest and DNA damage inducible alpha
chr1	68150777	68150926		X		Promoter (<=1kb)	1	68150860	68154021	3162	1	1647	uc001ddz.2	0	ENSG00000116717	GADD45A	growth arrest and DNA damage inducible alpha
chr1	68166599	68166748		X		Downstream (<1kb)	1	68150860	68154021	3162	1	1647	uc009wbd.2	15739	ENSG00000116717	GADD45A	growth arrest and DNA damage inducible alpha
chr1	68177278	68177283	X	X		"Intron (uc001dea.2/55970, intron 2 of 3)"	1	68150860	68154021	3162	1	1647	uc009wbd.2	26418	ENSG00000116717	GADD45A	growth arrest and DNA damage inducible alpha
chr1	68177284	68177427	X	X	X	"Intron (uc001dea.2/55970, intron 2 of 3)"	1	68150860	68154021	3162	1	1647	uc009wbd.2	26424	ENSG00000116717	GADD45A	growth arrest and DNA damage inducible alpha
chr1	68186662	68186811		X		"Intron (uc001dea.2/55970, intron 2 of 3)"	1	68150860	68154021	3162	1	1647	uc009wbd.2	35802	ENSG00000116717	GADD45A	growth arrest and DNA damage inducible alpha
chr1	68204169	68204239	X	X		"Intron (uc001dea.2/55970, intron 2 of 3)"	1	68150860	68154021	3162	1	1647	uc009wbd.2	53309	ENSG00000116717	GADD45A	growth arrest and DNA damage inducible alpha
chr1	68204240	68204318	X	X	X	"Intron (uc001dea.2/55970, intron 2 of 3)"	1	68150860	68154021	3162	1	1647	uc009wbd.2	53380	ENSG00000116717	GADD45A	growth arrest and DNA damage inducible alpha
chr1	68422854	68423003		X		"Intron (uc001deb.2/100289178, intron 1 of 9)"	1	68511645	68516481	4837	2	9077	uc001ded.3	93478	ENSG00000162595	DIRAS3	DIRAS family GTPase 3
chr1	68613334	68613483		X		"Intron (uc001deb.2/100289178, intron 9 of 9)"	1	68649201	68649293	93	2	100302279	uc021oos.1	35810	ENSG00000221203	MIR1262	microRNA 1262
chr1	68698175	68698324		X		Promoter (<=1kb)	1	68564142	68698284	134143	2	79971	uc001dee.3	0	ENSG00000116729	WLS	wntless Wnt ligand secretion mediator
chr1	68742225	68742374		X		Distal Intergenic	1	68659539	68698284	38746	2	79971	uc001deh.2	-43941	ENSG00000116729	WLS	wntless Wnt ligand secretion mediator
chr1	68757745	68757894		X		Distal Intergenic	1	68659539	68698284	38746	2	79971	uc001deh.2	-59461	ENSG00000116729	WLS	wntless Wnt ligand secretion mediator
chr1	68920338	68920487		X		Promoter (4-5kb)	1	68894507	68915642	21136	2	6121	uc001dei.1	-4696	ENSG00000116745	RPE65	"RPE65, retinoid isomerohydrolase"
chr1	68930717	68930866		X		Distal Intergenic	1	68894507	68915642	21136	2	6121	uc001dei.1	-15075	ENSG00000116745	RPE65	"RPE65, retinoid isomerohydrolase"
chr1	68962780	68962929		X		Promoter (<=1kb)	1	68939835	68962799	22965	2	55635	uc001del.4	0	ENSG00000024526	DEPDC1	DEP domain containing 1
chr1	68994184	68994333		X		"Intron (uc001den.3/uc001den.3, intron 1 of 2)"	1	68939835	68962799	22965	2	55635	uc001dem.4	-31385	ENSG00000024526	DEPDC1	DEP domain containing 1
chr1	69065864	69066013		X		Distal Intergenic	1	68939835	68962799	22965	2	55635	uc001dem.4	-103065	ENSG00000024526	DEPDC1	DEP domain containing 1
chr1	69163275	69163424		X		Distal Intergenic	1	68939835	68962799	22965	2	55635	uc001dem.4	-200476	ENSG00000024526	DEPDC1	DEP domain containing 1
chr1	69205256	69205405		X		Distal Intergenic	1	68939835	68962799	22965	2	55635	uc001dem.4	-242457	ENSG00000024526	DEPDC1	DEP domain containing 1
chr1	69313379	69313528		X		Distal Intergenic	1	68939835	68962799	22965	2	55635	uc001dem.4	-350580	ENSG00000024526	DEPDC1	DEP domain containing 1
chr1	69354128	69354277		X		Distal Intergenic	1	68939835	68962799	22965	2	55635	uc001dem.4	-391329	ENSG00000024526	DEPDC1	DEP domain containing 1
chr1	69389497	69389646		X		Distal Intergenic	1	68939835	68962799	22965	2	55635	uc001dem.4	-426698	ENSG00000024526	DEPDC1	DEP domain containing 1
chr1	69406768	69406917		X		Distal Intergenic	1	68939835	68962799	22965	2	55635	uc001dem.4	-443969	ENSG00000024526	DEPDC1	DEP domain containing 1
chr1	69441391	69441540		X		Distal Intergenic	1	68939835	68962799	22965	2	55635	uc001dem.4	-478592	ENSG00000024526	DEPDC1	DEP domain containing 1
chr1	69466651	69466800	X	X		Distal Intergenic	1	68939835	68962799	22965	2	55635	uc001dem.4	-503852	ENSG00000024526	DEPDC1	DEP domain containing 1
chr1	69687434	69687583		X		Distal Intergenic	1	70032868	70340687	307820	1	57554	uc001deo.1	-345285	ENSG00000033122	LRRC7	leucine rich repeat containing 7
chr1	69889162	69889311		X		Distal Intergenic	1	70032868	70340687	307820	1	57554	uc001deo.1	-143557	ENSG00000033122	LRRC7	leucine rich repeat containing 7
chr1	69891681	69891830		X		Distal Intergenic	1	70032868	70340687	307820	1	57554	uc001deo.1	-141038	ENSG00000033122	LRRC7	leucine rich repeat containing 7
chr1	69910642	69910791		X		Distal Intergenic	1	70032868	70340687	307820	1	57554	uc001deo.1	-122077	ENSG00000033122	LRRC7	leucine rich repeat containing 7
chr1	70005854	70006003		X		Distal Intergenic	1	70032868	70340687	307820	1	57554	uc001deo.1	-26865	ENSG00000033122	LRRC7	leucine rich repeat containing 7
chr1	70032969	70033118		X		Promoter (<=1kb)	1	70032868	70340687	307820	1	57554	uc001deo.1	101	ENSG00000033122	LRRC7	leucine rich repeat containing 7
chr1	70053232	70053376		X	X	"Intron (uc001deo.1/57554, intron 1 of 7)"	1	70032868	70340687	307820	1	57554	uc001deo.1	20364	ENSG00000033122	LRRC7	leucine rich repeat containing 7
chr1	70117525	70117674		X		"Intron (uc001deo.1/57554, intron 1 of 7)"	1	70032868	70340687	307820	1	57554	uc001deo.1	84657	ENSG00000033122	LRRC7	leucine rich repeat containing 7
chr1	70203373	70203522		X		"Intron (uc001deo.1/57554, intron 2 of 7)"	1	70225858	70589171	363314	1	57554	uc001dep.3	-22336	ENSG00000033122	LRRC7	leucine rich repeat containing 7
chr1	70204282	70204431		X		"Intron (uc001deo.1/57554, intron 2 of 7)"	1	70225858	70589171	363314	1	57554	uc001dep.3	-21427	ENSG00000033122	LRRC7	leucine rich repeat containing 7
chr1	70312072	70312172		X	X	"Intron (uc001deo.1/57554, intron 7 of 7)"	1	70385005	70386000	996	1	5301	uc009wbh.2	-72833	ENSG00000229359	PIN1P1	"peptidylprolyl cis/trans isomerase, NIMA-interacting 1 pseudogene 1"
chr1	70383046	70383195		X		Promoter (1-2kb)	1	70385005	70386000	996	1	5301	uc009wbh.2	-1810	ENSG00000229359	PIN1P1	"peptidylprolyl cis/trans isomerase, NIMA-interacting 1 pseudogene 1"
chr1	70433303	70433452		X		"Intron (uc001dep.3/57554, intron 6 of 24)"	1	70385005	70386000	996	1	5301	uc009wbh.2	48298	ENSG00000229359	PIN1P1	"peptidylprolyl cis/trans isomerase, NIMA-interacting 1 pseudogene 1"
chr1	70578664	70578813		X		"Intron (uc001dep.3/57554, intron 24 of 24)"	1	70502127	70589171	87045	1	57554	uc001deq.3	76537	ENSG00000033122	LRRC7	leucine rich repeat containing 7
chr1	70606703	70606852		X		Distal Intergenic	1	70610485	70671361	60877	2	55631	uc001der.2	64509	ENSG00000066557	LRRC40	leucine rich repeat containing 40
chr1	70671224	70671373		X		Promoter (<=1kb)	1	70610485	70671361	60877	2	55631	uc001der.2	0	ENSG00000066557	LRRC40	leucine rich repeat containing 40
chr1	70827844	70827993		X		"Intron (uc001dfa.3/11147, intron 1 of 2)"	1	70820493	70833705	13213	1	11147	uc010oqp.2	7351	ENSG00000197568	HHLA3	HERV-H LTR-associating 3
chr1	70876740	70876889		X		Promoter (<=1kb)	1	70876901	70897918	21018	1	1491	uc009wbl.2	-12	ENSG00000116761	CTH	cystathionine gamma-lyase
chr1	70970545	70970694		X		Distal Intergenic	1	70876901	70905534	28634	1	1491	uc010oqq.2	93644	ENSG00000116761	CTH	cystathionine gamma-lyase
chr1	71059284	71059433		X		Distal Intergenic	1	70876901	70905534	28634	1	1491	uc010oqq.2	182383	ENSG00000116761	CTH	cystathionine gamma-lyase
chr1	71066263	71066412		X		Distal Intergenic	1	70876901	70905534	28634	1	1491	uc010oqq.2	189362	ENSG00000116761	CTH	cystathionine gamma-lyase
chr1	71140926	71141075		X		Distal Intergenic	1	70876901	70905534	28634	1	1491	uc010oqq.2	264025	ENSG00000116761	CTH	cystathionine gamma-lyase
chr1	71141548	71141697		X		Distal Intergenic	1	70876901	70905534	28634	1	1491	uc010oqq.2	264647	ENSG00000116761	CTH	cystathionine gamma-lyase
chr1	71179985	71180134		X		"Intron (uc001dff.3/uc001dff.3, intron 5 of 6)"	1	70876901	70905534	28634	1	1491	uc010oqq.2	303084	ENSG00000116761	CTH	cystathionine gamma-lyase
chr1	71292234	71292383		X		Distal Intergenic	1	71512189	71532865	20677	1	100132618	uc001dfr.3	-219806	NA	ZRANB2-AS1	ZRANB2 antisense RNA 1
chr1	71513399	71513548		X		Promoter (<=1kb)	1	71318036	71513491	195456	2	5733	uc001dfg.1	0	ENSG00000050628	PTGER3	prostaglandin E receptor 3
chr1	71650197	71650346		X		"Intron (uc001dfu.2/100852410, intron 2 of 3)"	1	71547007	71703406	156400	1	100852410	uc001dfu.2	103190	ENSG00000229956	ZRANB2-AS2	ZRANB2 antisense RNA 2 (head to head)
chr1	71651095	71651244		X		"Intron (uc001dfu.2/100852410, intron 2 of 3)"	1	71547007	71703406	156400	1	100852410	uc001dfu.2	104088	ENSG00000229956	ZRANB2-AS2	ZRANB2 antisense RNA 2 (head to head)
chr1	71694535	71694684		X		"Intron (uc001dfu.2/100852410, intron 3 of 3)"	1	71547007	71703406	156400	1	100852410	uc001dfu.2	147528	ENSG00000229956	ZRANB2-AS2	ZRANB2 antisense RNA 2 (head to head)
chr1	71761130	71761279		X		Distal Intergenic	1	71547007	71703406	156400	1	100852410	uc001dfu.2	214123	ENSG00000229956	ZRANB2-AS2	ZRANB2 antisense RNA 2 (head to head)
chr1	71790465	71790614		X		Distal Intergenic	1	71547007	71703406	156400	1	100852410	uc001dfu.2	243458	ENSG00000229956	ZRANB2-AS2	ZRANB2 antisense RNA 2 (head to head)
chr1	71912723	71912872		X		"Intron (uc001dfv.3/257194, intron 6 of 6)"	1	71547007	71703406	156400	1	100852410	uc001dfu.2	365716	ENSG00000229956	ZRANB2-AS2	ZRANB2 antisense RNA 2 (head to head)
chr1	71937455	71937604		X		"Intron (uc001dfv.3/257194, intron 6 of 6)"	1	72259915	72302695	42781	2	100852409	uc031pmw.1	365091	ENSG00000228853	NEGR1-IT1	NEGR1 intronic transcript 1
chr1	72204070	72204219		X		"Intron (uc001dfv.3/257194, intron 3 of 6)"	1	72259915	72302695	42781	2	100852409	uc031pmw.1	98476	ENSG00000228853	NEGR1-IT1	NEGR1 intronic transcript 1
chr1	72466541	72466690		X		"Intron (uc001dfv.3/257194, intron 1 of 6)"	1	71868625	72566614	697990	2	257194	uc001dfv.3	99924	ENSG00000172260	NEGR1	neuronal growth regulator 1
chr1	72475882	72476031		X		"Intron (uc001dfv.3/257194, intron 1 of 6)"	1	71868625	72566614	697990	2	257194	uc001dfv.3	90583	ENSG00000172260	NEGR1	neuronal growth regulator 1
chr1	72478945	72479094		X		"Intron (uc001dfv.3/257194, intron 1 of 6)"	1	71868625	72566614	697990	2	257194	uc001dfv.3	87520	ENSG00000172260	NEGR1	neuronal growth regulator 1
chr1	72668310	72668459		X		"Intron (uc001dfw.3/257194, intron 1 of 6)"	1	71868625	72748405	879781	2	257194	uc001dfw.3	79946	ENSG00000172260	NEGR1	neuronal growth regulator 1
chr1	72672857	72673006		X		"Intron (uc001dfw.3/257194, intron 1 of 6)"	1	71868625	72748405	879781	2	257194	uc001dfw.3	75399	ENSG00000172260	NEGR1	neuronal growth regulator 1
chr1	72748518	72748667		X		Promoter (<=1kb)	1	71868625	72748405	879781	2	257194	uc010oqs.2	-113	ENSG00000172260	NEGR1	neuronal growth regulator 1
chr1	72749395	72749544		X		Promoter (<=1kb)	1	71868625	72748405	879781	2	257194	uc010oqs.2	-990	ENSG00000172260	NEGR1	neuronal growth regulator 1
chr1	72750091	72750240		X		Promoter (1-2kb)	1	71868625	72748405	879781	2	257194	uc010oqs.2	-1686	ENSG00000172260	NEGR1	neuronal growth regulator 1
chr1	72837118	72837267		X		Distal Intergenic	1	71868625	72748405	879781	2	257194	uc010oqs.2	-88713	ENSG00000172260	NEGR1	neuronal growth regulator 1
chr1	73107326	73107475		X		Distal Intergenic	1	71868625	72748405	879781	2	257194	uc010oqs.2	-358921	ENSG00000172260	NEGR1	neuronal growth regulator 1
chr1	73144508	73144657		X		Distal Intergenic	1	71868625	72748405	879781	2	257194	uc010oqs.2	-396103	ENSG00000172260	NEGR1	neuronal growth regulator 1
chr1	73235542	73235691		X		Distal Intergenic	1	71868625	72748405	879781	2	257194	uc010oqs.2	-487137	ENSG00000172260	NEGR1	neuronal growth regulator 1
chr1	73296371	73296520		X		Distal Intergenic	1	71868625	72748405	879781	2	257194	uc010oqs.2	-547966	ENSG00000172260	NEGR1	neuronal growth regulator 1
chr1	73641454	73641603		X		Distal Intergenic	1	71868625	72748405	879781	2	257194	uc010oqs.2	-893049	ENSG00000172260	NEGR1	neuronal growth regulator 1
chr1	73646486	73646635		X		Distal Intergenic	1	71868625	72748405	879781	2	257194	uc010oqs.2	-898081	ENSG00000172260	NEGR1	neuronal growth regulator 1
chr1	73766573	73766722		X		Distal Intergenic	1	74491702	74663871	172170	2	127255	uc001dfy.4	897149	ENSG00000162620	LRRIQ3	leucine rich repeats and IQ motif containing 3
chr1	73776788	73776937		X		"Intron (uc001dfx.3/uc001dfx.3, intron 3 of 3)"	1	74491702	74663871	172170	2	127255	uc001dfy.4	886934	ENSG00000162620	LRRIQ3	leucine rich repeats and IQ motif containing 3
chr1	73853397	73853546		X		Distal Intergenic	1	74491702	74663871	172170	2	127255	uc001dfy.4	810325	ENSG00000162620	LRRIQ3	leucine rich repeats and IQ motif containing 3
chr1	74003232	74003381		X		Distal Intergenic	1	74491702	74663871	172170	2	127255	uc001dfy.4	660490	ENSG00000162620	LRRIQ3	leucine rich repeats and IQ motif containing 3
chr1	74118366	74118515		X		Distal Intergenic	1	74491702	74663871	172170	2	127255	uc001dfy.4	545356	ENSG00000162620	LRRIQ3	leucine rich repeats and IQ motif containing 3
chr1	74120328	74120477		X		Distal Intergenic	1	74491702	74663871	172170	2	127255	uc001dfy.4	543394	ENSG00000162620	LRRIQ3	leucine rich repeats and IQ motif containing 3
chr1	74140732	74140881		X		Distal Intergenic	1	74491702	74663871	172170	2	127255	uc001dfy.4	522990	ENSG00000162620	LRRIQ3	leucine rich repeats and IQ motif containing 3
chr1	74389033	74389182		X		Distal Intergenic	1	74491702	74663871	172170	2	127255	uc001dfy.4	274689	ENSG00000162620	LRRIQ3	leucine rich repeats and IQ motif containing 3
chr1	74463421	74463438	X	X		Distal Intergenic	1	74491702	74663871	172170	2	127255	uc001dfy.4	200433	ENSG00000162620	LRRIQ3	leucine rich repeats and IQ motif containing 3
chr1	74463439	74463570	X	X	X	Distal Intergenic	1	74491702	74663871	172170	2	127255	uc001dfy.4	200301	ENSG00000162620	LRRIQ3	leucine rich repeats and IQ motif containing 3
chr1	74470372	74470521		X		Distal Intergenic	1	74491702	74663871	172170	2	127255	uc001dfy.4	193350	ENSG00000162620	LRRIQ3	leucine rich repeats and IQ motif containing 3
chr1	74571681	74571830		X		"Intron (uc001dfy.4/127255, intron 5 of 7)"	1	74491702	74663871	172170	2	127255	uc001dfy.4	92041	ENSG00000162620	LRRIQ3	leucine rich repeats and IQ motif containing 3
chr1	74663849	74663998		X		Promoter (<=1kb)	1	74663896	74837776	173881	1	100526835	uc001dgc.2	0	ENSG00000259030	FPGT-TNNI3K	FPGT-TNNI3K readthrough
chr1	74681892	74682041		X		"Intron (uc001dgc.2/100526835, intron 3 of 18)"	1	74663896	74674148	10253	1	8790	uc010oqu.2	17996	ENSG00000254685	FPGT	fucose-1-phosphate guanylyltransferase
chr1	74790848	74790997		X		"Intron (uc001dgc.2/100526835, intron 7 of 18)"	1	74701071	75010116	309046	1	51086	uc001dgf.2	89777	ENSG00000116783	TNNI3K	TNNI3 interacting kinase
chr1	74828900	74829049		X		"Intron (uc001dgc.2/100526835, intron 13 of 18)"	1	74701071	75010116	309046	1	51086	uc001dgf.2	127829	ENSG00000116783	TNNI3K	TNNI3 interacting kinase
chr1	74858653	74858802		X		"Intron (uc001dgd.3/100526835, intron 19 of 23)"	1	74701071	75010116	309046	1	51086	uc001dgf.2	157582	ENSG00000116783	TNNI3K	TNNI3 interacting kinase
chr1	74895306	74895455		X		"Intron (uc001dgd.3/100526835, intron 19 of 23)"	1	74701071	75010116	309046	1	51086	uc001dgf.2	194235	ENSG00000116783	TNNI3K	TNNI3 interacting kinase
chr1	74933607	74933756		X		"Intron (uc001dge.2/100526835, intron 23 of 26)"	1	75055011	75100538	45528	2	127254	uc001dgi.4	166782	ENSG00000178965	ERICH3	glutamate rich 3
chr1	74936801	74936950		X		"Intron (uc001dge.2/100526835, intron 23 of 26)"	1	75055011	75100538	45528	2	127254	uc001dgi.4	163588	ENSG00000178965	ERICH3	glutamate rich 3
chr1	75016511	75016660		X		Distal Intergenic	1	75055011	75100538	45528	2	127254	uc001dgi.4	83878	ENSG00000178965	ERICH3	glutamate rich 3
chr1	75037684	75037833		X		"Exon (uc001dgg.3/127254, exon 14 of 15)"	1	75055011	75100538	45528	2	127254	uc001dgi.4	62705	ENSG00000178965	ERICH3	glutamate rich 3
chr1	75198733	75198882		X		Promoter (<=1kb)	1	75198836	75232360	33525	1	127253	uc001dgn.3	0	ENSG00000162623	TYW3	tRNA-yW synthesizing protein 3 homolog
chr1	75277295	75277444		X		Distal Intergenic	1	75171172	75199092	27921	2	1429	uc001dgm.3	-78203	ENSG00000116791	CRYZ	crystallin zeta
chr1	75343210	75343359		X		Distal Intergenic	1	75171172	75199092	27921	2	1429	uc001dgm.3	-144118	ENSG00000116791	CRYZ	crystallin zeta
chr1	75452616	75452765		X		Distal Intergenic	1	75594119	75627218	33100	1	431707	uc001dgo.3	-141354	ENSG00000162624	LHX8	LIM homeobox 8
chr1	75524248	75524315	X	X		Distal Intergenic	1	75594119	75627218	33100	1	431707	uc001dgo.3	-69804	ENSG00000162624	LHX8	LIM homeobox 8
chr1	75524316	75524397	X	X	X	Distal Intergenic	1	75594119	75627218	33100	1	431707	uc001dgo.3	-69722	ENSG00000162624	LHX8	LIM homeobox 8
chr1	75548096	75548245		X		Distal Intergenic	1	75594119	75627218	33100	1	431707	uc001dgo.3	-45874	ENSG00000162624	LHX8	LIM homeobox 8
chr1	75557863	75558012		X		Distal Intergenic	1	75594119	75627218	33100	1	431707	uc001dgo.3	-36107	ENSG00000162624	LHX8	LIM homeobox 8
chr1	75664176	75664325		X		Distal Intergenic	1	75600567	75627218	26652	1	431707	uc031pmx.1	63609	ENSG00000162624	LHX8	LIM homeobox 8
chr1	75699130	75699279		X		"Intron (uc001dgr.2/204962, intron 14 of 25)"	1	75600567	75627218	26652	1	431707	uc031pmx.1	98563	ENSG00000162624	LHX8	LIM homeobox 8
chr1	75841909	75842058		X		"Intron (uc001dgr.2/204962, intron 4 of 25)"	1	75667816	76076799	408984	2	204962	uc001dgr.2	234741	ENSG00000137968	SLC44A5	solute carrier family 44 member 5
chr1	75868991	75869140		X		"Intron (uc001dgr.2/204962, intron 2 of 25)"	1	75667816	76076799	408984	2	204962	uc001dgr.2	207659	ENSG00000137968	SLC44A5	solute carrier family 44 member 5
chr1	75906067	75906216		X		"Intron (uc001dgr.2/204962, intron 2 of 25)"	1	75667816	76076799	408984	2	204962	uc001dgr.2	170583	ENSG00000137968	SLC44A5	solute carrier family 44 member 5
chr1	75988173	75988322		X		"Intron (uc001dgr.2/204962, intron 2 of 25)"	1	75667816	76076799	408984	2	204962	uc001dgr.2	88477	ENSG00000137968	SLC44A5	solute carrier family 44 member 5
chr1	76095758	76095907		X		"Intron (uc010oqz.1/204962, intron 1 of 22)"	1	75672075	76081694	409620	2	204962	uc010ora.2	-14064	ENSG00000137968	SLC44A5	solute carrier family 44 member 5
chr1	76138354	76138503		X		"Intron (uc010oqz.1/204962, intron 1 of 22)"	1	75667816	76143610	475795	2	204962	uc010oqz.1	5107	ENSG00000137968	SLC44A5	solute carrier family 44 member 5
chr1	76190292	76190441		X		Promoter (<=1kb)	1	76190043	76229355	39313	1	34	uc010orf.2	249	ENSG00000117054	ACADM	acyl-CoA dehydrogenase medium chain
chr1	76419207	76419356		X		Distal Intergenic	1	76384558	76398116	13559	2	127247	uc001dhf.2	-21091	ENSG00000154007	ASB17	ankyrin repeat and SOCS box containing 17
chr1	76482141	76482282	X	X	X	Distal Intergenic	1	76540389	77042892	502504	1	256435	uc001dhg.4	-58107	ENSG00000184005	ST6GALNAC3	"ST6 N-acetylgalactosaminide alpha-2,6-sialyltransferase 3"
chr1	76482283	76482290	X	X		Distal Intergenic	1	76540389	77042892	502504	1	256435	uc001dhg.4	-58099	ENSG00000184005	ST6GALNAC3	"ST6 N-acetylgalactosaminide alpha-2,6-sialyltransferase 3"
chr1	76506140	76506289		X		Distal Intergenic	1	76540389	77042892	502504	1	256435	uc001dhg.4	-34100	ENSG00000184005	ST6GALNAC3	"ST6 N-acetylgalactosaminide alpha-2,6-sialyltransferase 3"
chr1	76518757	76518906		X		Distal Intergenic	1	76540389	77042892	502504	1	256435	uc001dhg.4	-21483	ENSG00000184005	ST6GALNAC3	"ST6 N-acetylgalactosaminide alpha-2,6-sialyltransferase 3"
chr1	76540260	76540409		X		Promoter (<=1kb)	1	76540389	77042892	502504	1	256435	uc001dhg.4	0	ENSG00000184005	ST6GALNAC3	"ST6 N-acetylgalactosaminide alpha-2,6-sialyltransferase 3"
chr1	76548354	76548503		X		"Intron (uc001dhg.4/256435, intron 1 of 3)"	1	76540389	77096669	556281	1	256435	uc010orh.1	7965	ENSG00000184005	ST6GALNAC3	"ST6 N-acetylgalactosaminide alpha-2,6-sialyltransferase 3"
chr1	76554188	76554337		X		"Intron (uc001dhg.4/256435, intron 1 of 3)"	1	76540389	77096669	556281	1	256435	uc010orh.1	13799	ENSG00000184005	ST6GALNAC3	"ST6 N-acetylgalactosaminide alpha-2,6-sialyltransferase 3"
chr1	76606068	76606217		X		"Intron (uc001dhg.4/256435, intron 1 of 3)"	1	76540389	77096669	556281	1	256435	uc010orh.1	65679	ENSG00000184005	ST6GALNAC3	"ST6 N-acetylgalactosaminide alpha-2,6-sialyltransferase 3"
chr1	76852154	76852303		X		"Intron (uc001dhg.4/256435, intron 2 of 3)"	1	76540389	77096669	556281	1	256435	uc010orh.1	311765	ENSG00000184005	ST6GALNAC3	"ST6 N-acetylgalactosaminide alpha-2,6-sialyltransferase 3"
chr1	76900539	76900688		X		"Intron (uc001dhg.4/256435, intron 3 of 3)"	1	76540389	77096669	556281	1	256435	uc010orh.1	360150	ENSG00000184005	ST6GALNAC3	"ST6 N-acetylgalactosaminide alpha-2,6-sialyltransferase 3"
chr1	76909038	76909187		X		"Intron (uc001dhg.4/256435, intron 3 of 3)"	1	76540389	77096669	556281	1	256435	uc010orh.1	368649	ENSG00000184005	ST6GALNAC3	"ST6 N-acetylgalactosaminide alpha-2,6-sialyltransferase 3"
chr1	76967698	76967847		X		"Intron (uc001dhg.4/256435, intron 3 of 3)"	1	77333186	77529737	196552	1	81849	uc001dhi.3	-365339	ENSG00000117069	ST6GALNAC5	"ST6 N-acetylgalactosaminide alpha-2,6-sialyltransferase 5"
chr1	77436974	77437123		X		"Intron (uc001dhi.3/81849, intron 2 of 4)"	1	77334182	77529737	195556	1	81849	uc009wbw.3	102792	ENSG00000117069	ST6GALNAC5	"ST6 N-acetylgalactosaminide alpha-2,6-sialyltransferase 5"
chr1	77490298	77490447		X		"Intron (uc001dhi.3/81849, intron 2 of 4)"	1	77334182	77529737	195556	1	81849	uc009wbw.3	156116	ENSG00000117069	ST6GALNAC5	"ST6 N-acetylgalactosaminide alpha-2,6-sialyltransferase 5"
chr1	77740870	77741019		X		Promoter (6-7kb)	1	77747662	77780745	33084	1	26289	uc001dhm.2	-6643	ENSG00000154027	AK5	adenylate kinase 5
chr1	78011394	78011543		X		"Intron (uc001dhn.3/26289, intron 13 of 13)"	1	78030190	78099090	68901	2	26009	uc001dhp.3	87547	ENSG00000036549	ZZZ3	zinc finger ZZ-type containing 3
chr1	78121248	78121397		X		"Intron (uc001dhq.3/26009, intron 1 of 14)"	1	78030190	78099090	68901	2	26009	uc001dhp.3	-22158	ENSG00000036549	ZZZ3	zinc finger ZZ-type containing 3
chr1	78148583	78148732		X		Promoter (<=1kb)	1	78050202	78148343	98142	2	26009	uc009wbz.1	-240	ENSG00000036549	ZZZ3	zinc finger ZZ-type containing 3
chr1	78149093	78149242		X		Promoter (<=1kb)	1	78030190	78149104	118915	2	26009	uc001dhr.3	0	ENSG00000036549	ZZZ3	zinc finger ZZ-type containing 3
chr1	78354531	78354680		X		Promoter (<=1kb)	1	78354200	78409578	55379	1	91624	uc001dic.4	331	ENSG00000162614	NEXN	nexilin F-actin binding protein
chr1	78612845	78612994	X	X		Distal Intergenic	1	78695283	78759574	64292	1	149047	uc001dil.1	-82289	ENSG00000237413	MGC27382	uncharacterized MGC27382
chr1	78665910	78666059		X		Distal Intergenic	1	78695283	78759574	64292	1	149047	uc001dil.1	-29224	ENSG00000237413	MGC27382	uncharacterized MGC27382
chr1	78692926	78692961	X	X	X	Promoter (2-3kb)	1	78695283	78759574	64292	1	149047	uc001dil.1	-2322	ENSG00000237413	MGC27382	uncharacterized MGC27382
chr1	78692962	78693075	X	X		Promoter (2-3kb)	1	78695283	78759574	64292	1	149047	uc001dil.1	-2208	ENSG00000237413	MGC27382	uncharacterized MGC27382
chr1	78956762	78956911		X		Promoter (<=1kb)	1	78956728	79006386	49659	1	5737	uc001din.3	34	ENSG00000122420	PTGFR	prostaglandin F receptor
chr1	79053580	79053729		X		Distal Intergenic	1	79086088	79111830	25743	1	10964	uc010oro.2	-32359	ENSG00000137959	IFI44L	interferon induced protein 44 like
chr1	79243929	79244078		X		Distal Intergenic	1	79115477	79129763	14287	1	10561	uc001dip.4	128452	ENSG00000137965	IFI44	interferon induced protein 44
chr1	79534091	79534240		X		Distal Intergenic	1	79355449	79472495	117047	2	64123	uc001diq.4	-61596	ENSG00000162618	ADGRL4	adhesion G protein-coupled receptor L4
chr1	79727571	79727720		X		Distal Intergenic	1	79355449	79472495	117047	2	64123	uc001diq.4	-255076	ENSG00000162618	ADGRL4	adhesion G protein-coupled receptor L4
chr1	79728549	79728698		X		Distal Intergenic	1	79355449	79472495	117047	2	64123	uc001diq.4	-256054	ENSG00000162618	ADGRL4	adhesion G protein-coupled receptor L4
chr1	79852527	79852676		X		Distal Intergenic	1	79355449	79472495	117047	2	64123	uc001diq.4	-380032	ENSG00000162618	ADGRL4	adhesion G protein-coupled receptor L4
chr1	80051576	80051725		X		Distal Intergenic	1	79355449	79472495	117047	2	64123	uc001diq.4	-579081	ENSG00000162618	ADGRL4	adhesion G protein-coupled receptor L4
chr1	80070284	80070397		X	X	Distal Intergenic	1	79355449	79472495	117047	2	64123	uc001diq.4	-597789	ENSG00000162618	ADGRL4	adhesion G protein-coupled receptor L4
chr1	80108357	80108506		X		Distal Intergenic	1	79355449	79472495	117047	2	64123	uc001diq.4	-635862	ENSG00000162618	ADGRL4	adhesion G protein-coupled receptor L4
chr1	80160316	80160449		X	X	Distal Intergenic	1	79355449	79472495	117047	2	64123	uc001diq.4	-687821	ENSG00000162618	ADGRL4	adhesion G protein-coupled receptor L4
chr1	80168397	80168546		X		Distal Intergenic	1	79355449	79472495	117047	2	64123	uc001diq.4	-695902	ENSG00000162618	ADGRL4	adhesion G protein-coupled receptor L4
chr1	80243287	80243436		X		Distal Intergenic	1	79355449	79472495	117047	2	64123	uc001diq.4	-770792	ENSG00000162618	ADGRL4	adhesion G protein-coupled receptor L4
chr1	80322353	80322502		X		Distal Intergenic	1	79355449	79472495	117047	2	64123	uc001diq.4	-849858	ENSG00000162618	ADGRL4	adhesion G protein-coupled receptor L4
chr1	80724467	80724616		X		Distal Intergenic	1	81771845	82458107	686263	1	23266	uc001dis.3	-1047229	ENSG00000117114	ADGRL2	adhesion G protein-coupled receptor L2
chr1	80832923	80833072		X		Distal Intergenic	1	81771845	82458107	686263	1	23266	uc001dis.3	-938773	ENSG00000117114	ADGRL2	adhesion G protein-coupled receptor L2
chr1	81014227	81014376		X		Distal Intergenic	1	81771845	82458107	686263	1	23266	uc001dis.3	-757469	ENSG00000117114	ADGRL2	adhesion G protein-coupled receptor L2
chr1	81031809	81031954		X	X	Distal Intergenic	1	81771845	82458107	686263	1	23266	uc001dis.3	-739891	ENSG00000117114	ADGRL2	adhesion G protein-coupled receptor L2
chr1	81060124	81060273		X		Distal Intergenic	1	81771845	82458107	686263	1	23266	uc001dis.3	-711572	ENSG00000117114	ADGRL2	adhesion G protein-coupled receptor L2
chr1	81151076	81151225		X		Distal Intergenic	1	81771845	82458107	686263	1	23266	uc001dis.3	-620620	ENSG00000117114	ADGRL2	adhesion G protein-coupled receptor L2
chr1	81242023	81242172	X			Distal Intergenic	1	81771845	82458107	686263	1	23266	uc001dis.3	-529673	ENSG00000117114	ADGRL2	adhesion G protein-coupled receptor L2
chr1	81314277	81314426	X	X		Distal Intergenic	1	81771845	82458107	686263	1	23266	uc001dis.3	-457419	ENSG00000117114	ADGRL2	adhesion G protein-coupled receptor L2
chr1	81318767	81318916		X		Distal Intergenic	1	81771845	82458107	686263	1	23266	uc001dis.3	-452929	ENSG00000117114	ADGRL2	adhesion G protein-coupled receptor L2
chr1	81473500	81473649		X		Distal Intergenic	1	81771845	82458107	686263	1	23266	uc001dis.3	-298196	ENSG00000117114	ADGRL2	adhesion G protein-coupled receptor L2
chr1	81485341	81485490		X		Distal Intergenic	1	81771845	82458107	686263	1	23266	uc001dis.3	-286355	ENSG00000117114	ADGRL2	adhesion G protein-coupled receptor L2
chr1	81801684	81801833		X		"Intron (uc001dis.3/23266, intron 1 of 8)"	1	81771845	82458107	686263	1	23266	uc001dis.3	29839	ENSG00000117114	ADGRL2	adhesion G protein-coupled receptor L2
chr1	81979592	81979741		X		"Intron (uc001dis.3/23266, intron 2 of 8)"	1	82165455	82458107	292653	1	23266	uc001dit.4	-185714	ENSG00000117114	ADGRL2	adhesion G protein-coupled receptor L2
chr1	82128823	82128971	X	X	X	"Intron (uc001dis.3/23266, intron 4 of 8)"	1	82165455	82458107	292653	1	23266	uc001dit.4	-36484	ENSG00000117114	ADGRL2	adhesion G protein-coupled receptor L2
chr1	82128972	82128972	X	X		"Intron (uc001dis.3/23266, intron 4 of 8)"	1	82165455	82458107	292653	1	23266	uc001dit.4	-36483	ENSG00000117114	ADGRL2	adhesion G protein-coupled receptor L2
chr1	82266399	82266548		X		Promoter (<=1kb)	1	82266082	82458107	192026	1	23266	uc009wcd.3	317	ENSG00000117114	ADGRL2	adhesion G protein-coupled receptor L2
chr1	82266960	82267109		X		Promoter (<=1kb)	1	82266082	82458107	192026	1	23266	uc009wcd.3	878	ENSG00000117114	ADGRL2	adhesion G protein-coupled receptor L2
chr1	82540587	82540736	X	X		Distal Intergenic	1	82435998	82447660	11663	1	23266	uc009wce.1	104589	ENSG00000117114	ADGRL2	adhesion G protein-coupled receptor L2
chr1	82590902	82591051		X		Distal Intergenic	1	82435998	82447660	11663	1	23266	uc009wce.1	154904	ENSG00000117114	ADGRL2	adhesion G protein-coupled receptor L2
chr1	82660655	82660804	X	X		Distal Intergenic	1	82435998	82447660	11663	1	23266	uc009wce.1	224657	ENSG00000117114	ADGRL2	adhesion G protein-coupled receptor L2
chr1	82711829	82711978	X	X		Distal Intergenic	1	82435998	82447660	11663	1	23266	uc009wce.1	275831	ENSG00000117114	ADGRL2	adhesion G protein-coupled receptor L2
chr1	82952265	82952414		X		Distal Intergenic	1	82435998	82447660	11663	1	23266	uc009wce.1	516267	ENSG00000117114	ADGRL2	adhesion G protein-coupled receptor L2
chr1	83015704	83015853	X	X		Distal Intergenic	1	82435998	82447660	11663	1	23266	uc009wce.1	579706	ENSG00000117114	ADGRL2	adhesion G protein-coupled receptor L2
chr1	83325545	83325583	X	X		Distal Intergenic	1	82435998	82447660	11663	1	23266	uc009wce.1	889547	ENSG00000117114	ADGRL2	adhesion G protein-coupled receptor L2
chr1	83325584	83325694	X	X	X	Distal Intergenic	1	82435998	82447660	11663	1	23266	uc009wce.1	889586	ENSG00000117114	ADGRL2	adhesion G protein-coupled receptor L2
chr1	83568465	83568614		X		Distal Intergenic	1	84259598	84379059	119462	2	100847084	uc031pmy.1	810445	ENSG00000264406	MIR548AP	microRNA 548ap
chr1	83646427	83646576		X		Distal Intergenic	1	84259598	84379059	119462	2	100847084	uc031pmy.1	732483	ENSG00000264406	MIR548AP	microRNA 548ap
chr1	83648403	83648552		X		Distal Intergenic	1	84259598	84379059	119462	2	100847084	uc031pmy.1	730507	ENSG00000264406	MIR548AP	microRNA 548ap
chr1	83944542	83944691		X		Distal Intergenic	1	84259598	84379059	119462	2	100847084	uc031pmy.1	434368	ENSG00000264406	MIR548AP	microRNA 548ap
chr1	84012651	84012800	X	X		Distal Intergenic	1	84259598	84379059	119462	2	100847084	uc031pmy.1	366259	ENSG00000264406	MIR548AP	microRNA 548ap
chr1	84014112	84014244	X	X	X	Distal Intergenic	1	84259598	84379059	119462	2	100847084	uc031pmy.1	364815	ENSG00000264406	MIR548AP	microRNA 548ap
chr1	84014245	84014261	X	X		Distal Intergenic	1	84259598	84379059	119462	2	100847084	uc031pmy.1	364798	ENSG00000264406	MIR548AP	microRNA 548ap
chr1	84025150	84025299	X	X		Distal Intergenic	1	84259598	84379059	119462	2	100847084	uc031pmy.1	353760	ENSG00000264406	MIR548AP	microRNA 548ap
chr1	84320304	84320453		X		"Intron (uc001diz.4/uc001diz.4, intron 1 of 2)"	1	84259598	84379059	119462	2	100847084	uc031pmy.1	58606	ENSG00000264406	MIR548AP	microRNA 548ap
chr1	84486000	84486149	X	X		Distal Intergenic	1	84335381	84464833	129453	2	79739	uc001djg.3	-21167	ENSG00000137941	TTLL7	tubulin tyrosine ligase like 7
chr1	84543563	84543712		X		Promoter (<=1kb)	1	84543745	84670979	127235	1	5567	uc001dji.3	-33	ENSG00000142875	PRKACB	protein kinase cAMP-activated catalytic subunit beta
chr1	84971837	84971986		X		Promoter (<=1kb)	1	84964006	84972262	8257	2	2787	uc001djw.4	276	ENSG00000174021	GNG5	G protein subunit gamma 5
chr1	85048989	85049138		X		Promoter (8-9kb)	1	85018804	85040163	21360	2	1486	uc001dkb.2	-8826	ENSG00000117151	CTBS	chitobiase
chr1	85069007	85069156		X		Distal Intergenic	1	85093913	85097429	3517	2	439927	uc010ory.1	28273	ENSG00000180869	LINC01555	long intergenic non-protein coding RNA 1555
chr1	85156202	85156351		X		Promoter (<=1kb)	1	85109390	85156240	46851	2	117178	uc001dki.3	0	ENSG00000117155	SSX2IP	SSX family member 2 interacting protein
chr1	85170807	85170956		X		Distal Intergenic	1	85121148	85156440	35293	2	117178	uc001dkk.1	-14367	ENSG00000117155	SSX2IP	SSX family member 2 interacting protein
chr1	85187682	85187831	X	X		Distal Intergenic	1	85121148	85156440	35293	2	117178	uc001dkk.1	-31242	ENSG00000117155	SSX2IP	SSX family member 2 interacting protein
chr1	85213933	85214082		X		Distal Intergenic	1	85121148	85156440	35293	2	117178	uc001dkk.1	-57493	ENSG00000117155	SSX2IP	SSX family member 2 interacting protein
chr1	85313234	85313383		X		"Intron (uc001dkl.2/23566, intron 1 of 1)"	1	85279086	85331842	52757	2	23566	uc001dkl.2	18459	ENSG00000171517	LPAR3	lysophosphatidic acid receptor 3
chr1	85315289	85315438	X	X		"Intron (uc001dkl.2/23566, intron 1 of 1)"	1	85279086	85331842	52757	2	23566	uc001dkl.2	16404	ENSG00000171517	LPAR3	lysophosphatidic acid receptor 3
chr1	85358835	85358984		X		Promoter (<=1kb)	1	85279086	85358896	79811	2	23566	uc009wcj.1	0	ENSG00000171517	LPAR3	lysophosphatidic acid receptor 3
chr1	85666684	85666833		X		Promoter (<=1kb)	1	85623356	85666728	43373	2	84144	uc009wcm.3	0	ENSG00000097096	SYDE2	synapse defective Rho GTPase homolog 2
chr1	85667374	85667523		X		Promoter (<=1kb)	1	85646846	85666728	19883	2	84144	uc001dku.4	-646	ENSG00000097096	SYDE2	synapse defective Rho GTPase homolog 2
chr1	85725338	85725487		X		Promoter (<=1kb)	1	85715637	85725355	9719	2	148423	uc001dkv.3	0	ENSG00000162642	C1orf52	chromosome 1 open reading frame 52
chr1	85742264	85742413		X		Promoter (<=1kb)	1	85731460	85742587	11128	2	8915	uc021opd.1	174	ENSG00000142867	BCL10	B cell CLL/lymphoma 10
chr1	85930320	85930469		X		Promoter (<=1kb)	1	85784168	85930267	146100	2	23576	uc009wco.3	-53	ENSG00000153904	DDAH1	dimethylarginine dimethylaminohydrolase 1
chr1	86046980	86047129		X		Promoter (<=1kb)	1	86046444	86049648	3205	1	3491	uc001dle.3	536	ENSG00000142871	CYR61	cysteine rich angiogenic inducer 61
chr1	86107989	86108138		X		Distal Intergenic	1	86046444	86049648	3205	1	3491	uc001dle.3	61545	ENSG00000142871	CYR61	cysteine rich angiogenic inducer 61
chr1	86442680	86442829		X		"Intron (uc001dlj.3/255631, intron 20 of 59)"	1	86194916	86428932	234017	2	255631	uc001dli.3	-13748	ENSG00000171502	COL24A1	collagen type XXIV alpha 1 chain
chr1	86622611	86622760		X		Promoter (<=1kb)	1	86510811	86622446	111636	2	255631	uc009wcq.3	-165	ENSG00000171502	COL24A1	collagen type XXIV alpha 1 chain
chr1	86657772	86657921		X		Distal Intergenic	1	86510811	86622446	111636	2	255631	uc009wcq.3	-35326	ENSG00000171502	COL24A1	collagen type XXIV alpha 1 chain
chr1	86673224	86673373		X		Distal Intergenic	1	86510811	86622446	111636	2	255631	uc009wcq.3	-50778	ENSG00000171502	COL24A1	collagen type XXIV alpha 1 chain
chr1	86861946	86862095		X		Promoter (<=1kb)	1	86812507	86862025	49519	2	57489	uc001dlp.3	0	ENSG00000122417	ODF2L	outer dense fiber of sperm tails 2 like
chr1	86875375	86875524		X		Distal Intergenic	1	86826109	86862025	35917	2	57489	uc009wcr.2	-13350	ENSG00000122417	ODF2L	outer dense fiber of sperm tails 2 like
chr1	86968516	86968665		X		Distal Intergenic	1	86934395	86965974	31580	1	1179	uc001dlt.3	34121	ENSG00000016490	CLCA1	chloride channel accessory 1
chr1	87170164	87170313		X		Promoter (<=1kb)	1	87170253	87213867	43615	1	51100	uc001dlw.3	0	ENSG00000097033	SH3GLB1	"SH3 domain containing GRB2 like, endophilin B1"
chr1	87228746	87228802	X	X		Distal Intergenic	1	87170253	87213867	43615	1	51100	uc001dlz.3	58493	ENSG00000097033	SH3GLB1	"SH3 domain containing GRB2 like, endophilin B1"
chr1	87228803	87228895	X	X	X	Distal Intergenic	1	87170253	87213867	43615	1	51100	uc001dlz.3	58550	ENSG00000097033	SH3GLB1	"SH3 domain containing GRB2 like, endophilin B1"
chr1	87230875	87231024	X	X		Distal Intergenic	1	87170253	87213867	43615	1	51100	uc001dlz.3	60622	ENSG00000097033	SH3GLB1	"SH3 domain containing GRB2 like, endophilin B1"
chr1	87239980	87240129		X		Distal Intergenic	1	87170253	87213867	43615	1	51100	uc001dlz.3	69727	ENSG00000097033	SH3GLB1	"SH3 domain containing GRB2 like, endophilin B1"
chr1	87241221	87241370	X	X		Distal Intergenic	1	87170253	87213867	43615	1	51100	uc001dlz.3	70968	ENSG00000097033	SH3GLB1	"SH3 domain containing GRB2 like, endophilin B1"
chr1	87245212	87245361		X		Distal Intergenic	1	87170253	87213867	43615	1	51100	uc001dlz.3	74959	ENSG00000097033	SH3GLB1	"SH3 domain containing GRB2 like, endophilin B1"
chr1	87258858	87259007	X	X		Distal Intergenic	1	87170253	87213867	43615	1	51100	uc001dlz.3	88605	ENSG00000097033	SH3GLB1	"SH3 domain containing GRB2 like, endophilin B1"
chr1	87380073	87380222		X		Promoter (<=1kb)	1	87328128	87380107	51980	2	9403	uc021oph.1	0	ENSG00000183291	SELENOF	selenoprotein F
chr1	87457601	87457750		X		Promoter (<=1kb)	1	87458690	87634886	176197	1	339524	uc001dme.2	-940	ENSG00000267272	LINC01140	long intergenic non-protein coding RNA 1140
chr1	87555628	87555777		X		"Intron (uc001dmc.4/9653, intron 3 of 4)"	1	87595448	87602352	6905	1	339524	uc010osl.2	-39671	ENSG00000267272	LINC01140	long intergenic non-protein coding RNA 1140
chr1	87599445	87599520	X	X		Promoter (1-2kb)	1	87597609	87602352	4744	1	339524	uc010oso.2	1836	ENSG00000267272	LINC01140	long intergenic non-protein coding RNA 1140
chr1	87599521	87599594	X	X	X	Promoter (1-2kb)	1	87597609	87602352	4744	1	339524	uc010oso.2	1912	ENSG00000267272	LINC01140	long intergenic non-protein coding RNA 1140
chr1	87655724	87655873		X		Distal Intergenic	1	87597609	87602352	4744	1	339524	uc010oso.2	58115	ENSG00000267272	LINC01140	long intergenic non-protein coding RNA 1140
chr1	87685167	87685316		X		Distal Intergenic	1	87597609	87602352	4744	1	339524	uc010oso.2	87558	ENSG00000267272	LINC01140	long intergenic non-protein coding RNA 1140
chr1	87794037	87794186		X		Promoter (<=1kb)	1	87794151	87814607	20457	1	8543	uc001dmi.3	0	ENSG00000143013	LMO4	LIM domain only 4
chr1	87800414	87800563		X		"Intron (uc001dmi.3/8543, intron 2 of 4)"	1	87797351	87814607	17257	1	8543	uc001dmj.3	3063	ENSG00000143013	LMO4	LIM domain only 4
chr1	87835530	87835679		X		Promoter (1-2kb)	1	87819210	87837338	18129	2	100505768	uc001dmk.3	1659	ENSG00000227290	LINC01364	long intergenic non-protein coding RNA 1364
chr1	87915098	87915247		X		Distal Intergenic	1	87819210	87837338	18129	2	100505768	uc001dmk.3	-77760	ENSG00000227290	LINC01364	long intergenic non-protein coding RNA 1364
chr1	87938870	87939019	X	X		Distal Intergenic	1	87819210	87837338	18129	2	100505768	uc001dmk.3	-101532	ENSG00000227290	LINC01364	long intergenic non-protein coding RNA 1364
chr1	88195333	88195482		X		Distal Intergenic	1	87819210	87837338	18129	2	100505768	uc001dmk.3	-357995	ENSG00000227290	LINC01364	long intergenic non-protein coding RNA 1364
chr1	88202196	88202330		X	X	Distal Intergenic	1	87819210	87837338	18129	2	100505768	uc001dmk.3	-364858	ENSG00000227290	LINC01364	long intergenic non-protein coding RNA 1364
chr1	88252676	88252825		X		Distal Intergenic	1	87819210	87837338	18129	2	100505768	uc001dmk.3	-415338	ENSG00000227290	LINC01364	long intergenic non-protein coding RNA 1364
chr1	88393485	88393634		X		Distal Intergenic	1	87819210	87837338	18129	2	100505768	uc001dmk.3	-556147	ENSG00000227290	LINC01364	long intergenic non-protein coding RNA 1364
chr1	89114493	89114642		X		"Intron (uc021opn.1/uc021opn.1, intron 1 of 3)"	1	89149922	89301938	152017	1	5586	uc001dmn.3	-35280	ENSG00000065243	PKN2	protein kinase N2
chr1	89116504	89116653		X		"Intron (uc021opn.1/uc021opn.1, intron 1 of 3)"	1	89149922	89301938	152017	1	5586	uc001dmn.3	-33269	ENSG00000065243	PKN2	protein kinase N2
chr1	89128066	89128215		X		"Intron (uc021opn.1/uc021opn.1, intron 1 of 3)"	1	89149922	89301938	152017	1	5586	uc001dmn.3	-21707	ENSG00000065243	PKN2	protein kinase N2
chr1	89149699	89149848		X		Promoter (<=1kb)	1	89149922	89301938	152017	1	5586	uc001dmn.3	-74	ENSG00000065243	PKN2	protein kinase N2
chr1	89150598	89150747		X		Promoter (<=1kb)	1	89149922	89301938	152017	1	5586	uc010osq.2	676	ENSG00000065243	PKN2	protein kinase N2
chr1	89240023	89240172		X		Promoter (6-7kb)	1	89246722	89301938	55217	1	5586	uc010osr.2	-6550	ENSG00000065243	PKN2	protein kinase N2
chr1	89357171	89357320		X		Promoter (<=1kb)	1	89318321	89357301	38981	2	2959	uc001dmo.4	0	ENSG00000137947	GTF2B	general transcription factor IIB
chr1	89458602	89458751		X		Promoter (<=1kb)	1	89445139	89458643	13505	2	494115	uc001dms.3	0	ENSG00000213516	RBMXL1	"RNA binding motif protein, X-linked like 1"
chr1	89486044	89486193		X		Promoter (2-3kb)	1	89472360	89488549	16190	2	2635	uc001dmt.3	2356	ENSG00000117226	GBP3	guanylate binding protein 3
chr1	89488036	89488185		X		Promoter (<=1kb)	1	89472360	89488549	16190	2	2635	uc001dmt.3	364	ENSG00000117226	GBP3	guanylate binding protein 3
chr1	89685695	89685844		X		Distal Intergenic	1	89646831	89664633	17803	2	115361	uc001dnb.3	-21062	ENSG00000162654	GBP4	guanylate binding protein 4
chr1	89727142	89727223		X	X	"Intron (uc001dnc.3/115362, intron 11 of 11)"	1	89728366	89738487	10122	2	115362	uc001dne.1	11264	ENSG00000154451	GBP5	guanylate binding protein 5
chr1	89875323	89875472		X		Promoter (2-3kb)	1	89873238	89890493	17256	1	400759	uc009wcy.1	2085	ENSG00000225492	GBP1P1	guanylate binding protein 1 pseudogene 1
chr1	89920803	89920952		X		Distal Intergenic	1	89873238	89890493	17256	1	400759	uc009wcy.1	47565	ENSG00000225492	GBP1P1	guanylate binding protein 1 pseudogene 1
chr1	89990299	89990448		X		Promoter (<=1kb)	1	89990397	90063420	73024	1	23507	uc001dnh.3	0	ENSG00000197147	LRRC8B	leucine rich repeat containing 8 VRAC subunit B
chr1	90016635	90016784		X		Promoter (7-8kb)	1	90024270	90063420	39151	1	23507	uc001dnj.3	-7486	ENSG00000197147	LRRC8B	leucine rich repeat containing 8 VRAC subunit B
chr1	90098450	90098599		X		Promoter (<=1kb)	1	90090408	90098453	8046	2	400761	uc001dnk.1	0	ENSG00000231999	LRRC8C-DT	LRRC8C divergent transcript
chr1	90218144	90218293		X		Distal Intergenic	1	90286573	90401989	115417	1	55144	uc001dnm.3	-68280	ENSG00000171492	LRRC8D	leucine rich repeat containing 8 VRAC subunit D
chr1	90278309	90278458		X		Promoter (8-9kb)	1	90286573	90401989	115417	1	55144	uc001dnm.3	-8115	ENSG00000171492	LRRC8D	leucine rich repeat containing 8 VRAC subunit D
chr1	90384021	90384170			X	"Intron (uc001dnm.3/55144, intron 2 of 2)"	1	90458824	90460525	1702	2	492303	uc001dno.3	76355	NA	GEMIN8P4	gem nuclear organelle associated protein 8 pseudogene 4
chr1	90408623	90408772	X	X		Distal Intergenic	1	90458824	90460525	1702	2	492303	uc001dno.3	51753	NA	GEMIN8P4	gem nuclear organelle associated protein 8 pseudogene 4
chr1	90439179	90439328		X		Distal Intergenic	1	90458824	90460525	1702	2	492303	uc001dno.3	21197	NA	GEMIN8P4	gem nuclear organelle associated protein 8 pseudogene 4
chr1	90460538	90460687		X		Promoter (<=1kb)	1	90460678	90472000	11323	1	284695	uc001dnp.4	0	ENSG00000162664	ZNF326	zinc finger protein 326
chr1	90808634	90808783		X		Distal Intergenic	1	90460678	90494094	33417	1	284695	uc009wda.1	347956	ENSG00000162664	ZNF326	zinc finger protein 326
chr1	90825606	90825755		X		Distal Intergenic	1	91177579	91182794	5216	2	343472	uc001dns.3	357039	ENSG00000143032	BARHL2	BarH like homeobox 2
chr1	91023834	91023983		X		Distal Intergenic	1	91177579	91182794	5216	2	343472	uc001dns.3	158811	ENSG00000143032	BARHL2	BarH like homeobox 2
chr1	91057052	91057201		X		Distal Intergenic	1	91177579	91182794	5216	2	343472	uc001dns.3	125593	ENSG00000143032	BARHL2	BarH like homeobox 2
chr1	91183563	91183712		X		Promoter (<=1kb)	1	91177579	91182794	5216	2	343472	uc001dns.3	-769	ENSG00000143032	BARHL2	BarH like homeobox 2
chr1	91214428	91214566	X	X	X	Distal Intergenic	1	91177579	91182794	5216	2	343472	uc001dns.3	-31634	ENSG00000143032	BARHL2	BarH like homeobox 2
chr1	91214567	91214577	X	X		Distal Intergenic	1	91177579	91182794	5216	2	343472	uc001dns.3	-31773	ENSG00000143032	BARHL2	BarH like homeobox 2
chr1	91292490	91292639		X		Distal Intergenic	1	91177579	91182794	5216	2	343472	uc001dns.3	-109696	ENSG00000143032	BARHL2	BarH like homeobox 2
chr1	91299195	91299331		X	X	"Intron (uc001dnt.1/uc001dnt.1, intron 1 of 1)"	1	91177579	91182794	5216	2	343472	uc001dns.3	-116401	ENSG00000143032	BARHL2	BarH like homeobox 2
chr1	91368342	91368481		X	X	Distal Intergenic	1	91380857	91487065	106209	2	84146	uc001dnv.3	118584	ENSG00000122482	ZNF644	zinc finger protein 644
chr1	91414018	91414162		X	X	"Intron (uc001dnv.3/84146, intron 2 of 3)"	1	91380857	91487065	106209	2	84146	uc001dnv.3	72903	ENSG00000122482	ZNF644	zinc finger protein 644
chr1	91869960	91870109		X		Promoter (<=1kb)	1	91726323	91870426	144104	2	164045	uc001doa.4	317	ENSG00000162669	HFM1	"HFM1, ATP dependent DNA helicase homolog"
chr1	91923026	91923175	X			Distal Intergenic	1	91966404	91991321	24918	1	8317	uc001doe.3	-43229	ENSG00000097046	CDC7	cell division cycle 7
chr1	91966887	91967036		X		Promoter (<=1kb)	1	91966665	91991321	24657	1	8317	uc009wdc.3	222	ENSG00000097046	CDC7	cell division cycle 7
chr1	92014701	92014850		X		Distal Intergenic	1	91980376	91991321	10946	1	8317	uc009wdd.3	34325	ENSG00000097046	CDC7	cell division cycle 7
chr1	92014955	92015104			X	Distal Intergenic	1	91980376	91991321	10946	1	8317	uc009wdd.3	34579	ENSG00000097046	CDC7	cell division cycle 7
chr1	92060385	92060534	X	X		Distal Intergenic	1	91980376	91991321	10946	1	8317	uc009wdd.3	80009	ENSG00000097046	CDC7	cell division cycle 7
chr1	92173223	92173308	X	X		"Intron (uc009wde.3/7049, intron 17 of 19)"	1	92145900	92327603	181704	2	7049	uc009wde.3	154295	ENSG00000069702	TGFBR3	transforming growth factor beta receptor 3
chr1	92173309	92173372	X	X	X	"Intron (uc009wde.3/7049, intron 17 of 19)"	1	92145900	92327603	181704	2	7049	uc009wde.3	154231	ENSG00000069702	TGFBR3	transforming growth factor beta receptor 3
chr1	92178608	92178757		X		"Intron (uc009wde.3/7049, intron 15 of 19)"	1	92145900	92327603	181704	2	7049	uc009wde.3	148846	ENSG00000069702	TGFBR3	transforming growth factor beta receptor 3
chr1	92341746	92341895		X		"Intron (uc001doh.3/7049, intron 1 of 16)"	1	92145900	92351836	205937	2	7049	uc001doh.3	9941	ENSG00000069702	TGFBR3	transforming growth factor beta receptor 3
chr1	92495835	92495984		X		Promoter (<=1kb)	1	92495533	92529093	33561	1	253152	uc001don.2	302	ENSG00000172031	EPHX4	epoxide hydrolase 4
chr1	92545952	92546101		X		Promoter (<=1kb)	1	92545862	92613401	67540	1	284697	uc010otc.2	90	ENSG00000284413	BTBD8	BTB domain containing 8
chr1	92764421	92764570		X		Promoter (<=1kb)	1	92711955	92764566	52612	2	11146	uc001dor.3	0	ENSG00000174842	GLMN	"glomulin, FKBP associated protein"
chr1	92912188	92912337	X	X		Distal Intergenic	1	92940318	92949356	9039	2	2672	uc001dou.4	37019	ENSG00000162676	GFI1	growth factor independent 1 transcriptional repressor
chr1	93240261	93240404		X	X	"Intron (uc001dox.3/7813, intron 1 of 17)"	1	92974253	93257961	283709	2	7813	uc001dox.3	17557	ENSG00000067208	EVI5	ecotropic viral integration site 5
chr1	93250702	93250851		X		"Intron (uc001dox.3/7813, intron 1 of 17)"	1	92974253	93257961	283709	2	7813	uc001dox.3	7110	ENSG00000067208	EVI5	ecotropic viral integration site 5
chr1	93426891	93427040		X	X	Promoter (<=1kb)	1	93298286	93427079	128794	2	388650	uc001dpc.3	39	ENSG00000154511	FAM69A	family with sequence similarity 69 member A
chr1	93544668	93544817		X		Promoter (<=1kb)	1	93544792	93604638	59847	1	22823	uc001dpi.4	0	ENSG00000143033	MTF2	metal response element binding transcription factor 2
chr1	93645966	93646115		X		Promoter (<=1kb)	1	93615299	93646246	30948	2	50999	uc001dpn.3	131	ENSG00000117500	TMED5	transmembrane p24 trafficking protein 5
chr1	93743029	93743175	X	X	X	"Intron (uc021opx.1/343099, intron 27 of 27)"	1	93720028	93730500	10473	1	343099	uc001dpr.1	23001	ENSG00000122483	CCDC18	coiled-coil domain containing 18
chr1	93743176	93743178	X	X		"Intron (uc021opx.1/343099, intron 27 of 27)"	1	93720028	93730500	10473	1	343099	uc001dpr.1	23148	ENSG00000122483	CCDC18	coiled-coil domain containing 18
chr1	93811310	93811459		X		Promoter (<=1kb)	1	93775666	93811368	35703	2	100131564	uc001dpt.2	0	NA	CCDC18-AS1	CCDC18 antisense RNA 1
chr1	93907980	93908129	X	X		Promoter (5-6kb)	1	93913688	94020218	106531	1	54874	uc001dpv.3	-5559	ENSG00000137942	FNBP1L	formin binding protein 1 like
chr1	93913535	93913684		X		Promoter (<=1kb)	1	93913688	94020218	106531	1	54874	uc001dpv.3	-4	ENSG00000137942	FNBP1L	formin binding protein 1 like
chr1	93914220	93914369		X		Promoter (<=1kb)	1	93913688	94020218	106531	1	54874	uc010otk.2	532	ENSG00000137942	FNBP1L	formin binding protein 1 like
chr1	93939951	93939962	X	X		"Intron (uc001dpv.3/54874, intron 1 of 14)"	1	93913688	94020218	106531	1	54874	uc010otk.2	26263	ENSG00000137942	FNBP1L	formin binding protein 1 like
chr1	93939963	93940100	X	X	X	"Intron (uc001dpv.3/54874, intron 1 of 14)"	1	93913688	94020218	106531	1	54874	uc010otk.2	26275	ENSG00000137942	FNBP1L	formin binding protein 1 like
chr1	93975666	93975815		X		"Intron (uc001dpv.3/54874, intron 2 of 14)"	1	94009664	94020218	10555	1	54874	uc010otl.2	-33849	ENSG00000137942	FNBP1L	formin binding protein 1 like
chr1	94074212	94074361	X	X		"Intron (uc001dpy.4/8412, intron 1 of 9)"	1	94027343	94079702	52360	2	8412	uc001dpy.4	5341	ENSG00000137936	BCAR3	"BCAR3, NSP family adaptor protein"
chr1	94080962	94081111		X		Promoter (1-2kb)	1	94027343	94079702	52360	2	8412	uc001dpy.4	-1260	ENSG00000137936	BCAR3	"BCAR3, NSP family adaptor protein"
chr1	94087883	94087946	X	X	X	Promoter (8-9kb)	1	94027343	94079702	52360	2	8412	uc001dpy.4	-8181	ENSG00000137936	BCAR3	"BCAR3, NSP family adaptor protein"
chr1	94087947	94088032	X	X		Promoter (8-9kb)	1	94027343	94079702	52360	2	8412	uc001dpy.4	-8245	ENSG00000137936	BCAR3	"BCAR3, NSP family adaptor protein"
chr1	94130608	94130757	X	X		"Intron (uc001dpz.4/8412, intron 2 of 11)"	1	94027343	94146926	119584	2	8412	uc001dpz.4	16169	ENSG00000137936	BCAR3	"BCAR3, NSP family adaptor protein"
chr1	94181286	94181435		X		"Intron (uc001dqb.4/8412, intron 2 of 13)"	1	94027343	94147394	120052	2	8412	uc001dqa.4	-33892	ENSG00000137936	BCAR3	"BCAR3, NSP family adaptor protein"
chr1	94234243	94234392		X		"Intron (uc001dqb.4/8412, intron 2 of 13)"	1	94312388	94312467	80	1	100126348	uc021oqa.1	-77996	ENSG00000211575	MIR760	microRNA 760
chr1	94302288	94302437		X		Promoter (9-10kb)	1	94312388	94312467	80	1	100126348	uc021oqa.1	-9951	ENSG00000211575	MIR760	microRNA 760
chr1	94329838	94329987		X		Distal Intergenic	1	94335014	94344762	9749	2	30836	uc001dqf.3	14775	ENSG00000067334	DNTTIP2	deoxynucleotidyltransferase terminal interacting protein 2
chr1	94375054	94375203		X		Promoter (<=1kb)	1	94352590	94375012	22423	2	2730	uc031pnc.1	-42	ENSG00000023909	GCLM	glutamate-cysteine ligase modifier subunit
chr1	94499436	94499585		X		"Intron (uc001dqh.3/24, intron 26 of 49)"	1	94475933	94484228	8296	2	24	uc009wdp.1	-15208	ENSG00000198691	ABCA4	ATP binding cassette subfamily A member 4
chr1	94516349	94516496		X	X	"Intron (uc001dqh.3/24, intron 17 of 49)"	1	94475933	94484228	8296	2	24	uc009wdp.1	-32121	ENSG00000198691	ABCA4	ATP binding cassette subfamily A member 4
chr1	94570846	94570857	X	X		"Intron (uc001dqh.3/24, intron 4 of 49)"	1	94458394	94586705	128312	2	24	uc001dqh.3	15848	ENSG00000198691	ABCA4	ATP binding cassette subfamily A member 4
chr1	94570858	94570995	X	X	X	"Intron (uc001dqh.3/24, intron 4 of 49)"	1	94458394	94586705	128312	2	24	uc001dqh.3	15710	ENSG00000198691	ABCA4	ATP binding cassette subfamily A member 4
chr1	94713217	94713366		X		Promoter (9-10kb)	1	94667452	94703307	35856	2	9411	uc001dql.3	-9910	ENSG00000137962	ARHGAP29	Rho GTPase activating protein 29
chr1	94792018	94792167		X		Distal Intergenic	1	94615403	94740624	125222	2	9411	uc009wdq.1	-51394	ENSG00000137962	ARHGAP29	Rho GTPase activating protein 29
chr1	94793066	94793215	X	X		Distal Intergenic	1	94615403	94740624	125222	2	9411	uc009wdq.1	-52442	ENSG00000137962	ARHGAP29	Rho GTPase activating protein 29
chr1	94808139	94808155	X	X		Distal Intergenic	1	94615403	94740624	125222	2	9411	uc009wdq.1	-67515	ENSG00000137962	ARHGAP29	Rho GTPase activating protein 29
chr1	94808156	94808288	X	X	X	Distal Intergenic	1	94615403	94740624	125222	2	9411	uc009wdq.1	-67532	ENSG00000137962	ARHGAP29	Rho GTPase activating protein 29
chr1	94860834	94860983			X	Distal Intergenic	1	94883933	94944260	60328	1	5825	uc001dqm.4	-22950	ENSG00000117528	ABCD3	ATP binding cassette subfamily D member 3
chr1	94883836	94883985		X		Promoter (<=1kb)	1	94883933	94944260	60328	1	5825	uc001dqm.4	0	ENSG00000117528	ABCD3	ATP binding cassette subfamily D member 3
chr1	94891564	94891713			X	"Intron (uc001dqm.4/5825, intron 1 of 8)"	1	94883933	94984219	100287	1	5825	uc010otp.2	7631	ENSG00000117528	ABCD3	ATP binding cassette subfamily D member 3
chr1	94929095	94929244		X		"Intron (uc001dqm.4/5825, intron 2 of 8)"	1	94947049	94984219	37171	1	5825	uc001dqo.4	-17805	ENSG00000117528	ABCD3	ATP binding cassette subfamily D member 3
chr1	95007389	95007538		X		Promoter (<=1kb)	1	94994732	95007413	12682	2	2152	uc001dqr.3	0	ENSG00000117525	F3	"coagulation factor III, tissue factor"
chr1	95033659	95033758	X	X	X	Distal Intergenic	1	95005813	95007413	1601	2	2152	uc001dqt.3	-26246	ENSG00000117525	F3	"coagulation factor III, tissue factor"
chr1	95033759	95033808	X	X		Distal Intergenic	1	95005813	95007413	1601	2	2152	uc001dqt.3	-26346	ENSG00000117525	F3	"coagulation factor III, tissue factor"
chr1	95093658	95093807	X	X		Distal Intergenic	1	95005813	95007413	1601	2	2152	uc001dqt.3	-86245	ENSG00000117525	F3	"coagulation factor III, tissue factor"
chr1	95123459	95123608		X		"Exon (uc001dqu.3/uc001dqu.3, exon 5 of 5)"	1	95005813	95007413	1601	2	2152	uc001dqt.3	-116046	ENSG00000117525	F3	"coagulation factor III, tissue factor"
chr1	95154386	95154455		X	X	"Intron (uc001dqu.3/uc001dqu.3, intron 3 of 4)"	1	95285898	95360803	74906	1	126969	uc001dqv.5	-131443	ENSG00000143036	SLC44A3	solute carrier family 44 member 3
chr1	95163559	95163708			X	"Intron (uc001dqu.3/uc001dqu.3, intron 3 of 4)"	1	95285898	95360803	74906	1	126969	uc001dqv.5	-122190	ENSG00000143036	SLC44A3	solute carrier family 44 member 3
chr1	95221455	95221604		X		"Intron (uc001dqu.3/uc001dqu.3, intron 1 of 4)"	1	95285898	95360803	74906	1	126969	uc001dqv.5	-64294	ENSG00000143036	SLC44A3	solute carrier family 44 member 3
chr1	95392653	95392802		X		Promoter (<=1kb)	1	95362507	95392735	30229	2	1266	uc001dqz.4	0	ENSG00000117519	CNN3	calponin 3
chr1	95527221	95527370	X	X		"Intron (uc001dra.2/199857, intron 2 of 3)"	1	95448279	95538507	90229	2	199857	uc001dra.2	11137	ENSG00000172339	ALG14	"ALG14, UDP-N-acetylglucosaminyltransferase subunit"
chr1	95538449	95538598		X		Promoter (<=1kb)	1	95448279	95538507	90229	2	199857	uc001dra.2	0	ENSG00000172339	ALG14	"ALG14, UDP-N-acetylglucosaminyltransferase subunit"
chr1	95552000	95552149		X		Promoter (5-6kb)	1	95558073	95663161	105089	1	148534	uc021oqe.1	-5924	ENSG00000152078	TMEM56	transmembrane protein 56
chr1	95587978	95588127		X		"Intron (uc021oqe.1/148534, intron 1 of 6)"	1	95583479	95710509	127031	1	100527978	uc001drd.4	4499	ENSG00000271092	TMEM56-RWDD3	TMEM56-RWDD3 readthrough
chr1	95699566	95699715		X		Promoter (<=1kb)	1	95699711	95710509	10799	1	100527978	uc009wdt.3	0	ENSG00000271092	TMEM56-RWDD3	TMEM56-RWDD3 readthrough
chr1	95772812	95772961		X		Distal Intergenic	1	95699711	95712781	13071	1	25950	uc031pnd.1	73101	ENSG00000122481	RWDD3	RWD domain containing 3
chr1	95833488	95833637		X		Distal Intergenic	1	95940293	95944912	4620	1	440594	uc021oqf.1	-106656	ENSG00000233907	LINC01761	long intergenic non-protein coding RNA 1761
chr1	95975713	95975862		X		Distal Intergenic	1	95940293	95944912	4620	1	440594	uc021oqf.1	35420	ENSG00000233907	LINC01761	long intergenic non-protein coding RNA 1761
chr1	96047851	96047998	X		X	Distal Intergenic	1	95940293	95944912	4620	1	440594	uc021oqf.1	107558	ENSG00000233907	LINC01761	long intergenic non-protein coding RNA 1761
chr1	96049479	96049628		X		Distal Intergenic	1	95940293	95944912	4620	1	440594	uc021oqf.1	109186	ENSG00000233907	LINC01761	long intergenic non-protein coding RNA 1761
chr1	96093006	96093155		X		Distal Intergenic	1	95940293	95944912	4620	1	440594	uc021oqf.1	152713	ENSG00000233907	LINC01761	long intergenic non-protein coding RNA 1761
chr1	96208282	96208431		X		Distal Intergenic	1	95940293	95944912	4620	1	440594	uc021oqf.1	267989	ENSG00000233907	LINC01761	long intergenic non-protein coding RNA 1761
chr1	96275037	96275186		X		Distal Intergenic	1	95940293	95944912	4620	1	440594	uc021oqf.1	334744	ENSG00000233907	LINC01761	long intergenic non-protein coding RNA 1761
chr1	96275781	96275927	X	X	X	Distal Intergenic	1	95940293	95944912	4620	1	440594	uc021oqf.1	335488	ENSG00000233907	LINC01761	long intergenic non-protein coding RNA 1761
chr1	96275928	96275930	X	X		Distal Intergenic	1	95940293	95944912	4620	1	440594	uc021oqf.1	335635	ENSG00000233907	LINC01761	long intergenic non-protein coding RNA 1761
chr1	96303521	96303670		X		Distal Intergenic	1	95940293	95944912	4620	1	440594	uc021oqf.1	363228	ENSG00000233907	LINC01761	long intergenic non-protein coding RNA 1761
chr1	96377359	96377508		X		Distal Intergenic	1	95940293	95944912	4620	1	440594	uc021oqf.1	437066	ENSG00000233907	LINC01761	long intergenic non-protein coding RNA 1761
chr1	96413692	96413841		X		Distal Intergenic	1	95940293	95944912	4620	1	440594	uc021oqf.1	473399	ENSG00000233907	LINC01761	long intergenic non-protein coding RNA 1761
chr1	96455660	96455805		X	X	Distal Intergenic	1	95940293	95944912	4620	1	440594	uc021oqf.1	515367	ENSG00000233907	LINC01761	long intergenic non-protein coding RNA 1761
chr1	96615796	96615945	X	X		Distal Intergenic	1	97187175	97239518	52344	1	58155	uc001drm.2	-571230	ENSG00000117569	PTBP2	polypyrimidine tract binding protein 2
chr1	96650815	96650964		X		Distal Intergenic	1	97187175	97239518	52344	1	58155	uc001drm.2	-536211	ENSG00000117569	PTBP2	polypyrimidine tract binding protein 2
chr1	96875341	96875490		X		Distal Intergenic	1	97187175	97239518	52344	1	58155	uc001drm.2	-311685	ENSG00000117569	PTBP2	polypyrimidine tract binding protein 2
chr1	97085840	97085989		X		Distal Intergenic	1	97187175	97239518	52344	1	58155	uc001drm.2	-101186	ENSG00000117569	PTBP2	polypyrimidine tract binding protein 2
chr1	97097658	97097756	X	X	X	Distal Intergenic	1	97187175	97239518	52344	1	58155	uc001drm.2	-89419	ENSG00000117569	PTBP2	polypyrimidine tract binding protein 2
chr1	97097757	97097807	X	X		Distal Intergenic	1	97187175	97239518	52344	1	58155	uc001drm.2	-89368	ENSG00000117569	PTBP2	polypyrimidine tract binding protein 2
chr1	97181199	97181348		X		Promoter (5-6kb)	1	97187175	97239518	52344	1	58155	uc001drm.2	-5827	ENSG00000117569	PTBP2	polypyrimidine tract binding protein 2
chr1	97187103	97187252		X		Promoter (<=1kb)	1	97187175	97239518	52344	1	58155	uc001drm.2	0	ENSG00000117569	PTBP2	polypyrimidine tract binding protein 2
chr1	97303509	97303658		X		Distal Intergenic	1	97250615	97280605	29991	1	58155	uc001drt.3	52894	ENSG00000117569	PTBP2	polypyrimidine tract binding protein 2
chr1	97324346	97324495		X		Distal Intergenic	1	97250615	97280605	29991	1	58155	uc001drt.3	73731	ENSG00000117569	PTBP2	polypyrimidine tract binding protein 2
chr1	97454940	97455089		X		Distal Intergenic	1	97561479	97788511	227033	1	100873932	uc031pne.1	-106390	ENSG00000232878	DPYD-AS1	DPYD antisense RNA 1
chr1	97456534	97456538	X	X		Distal Intergenic	1	97561479	97788511	227033	1	100873932	uc031pne.1	-104941	ENSG00000232878	DPYD-AS1	DPYD antisense RNA 1
chr1	97456539	97456683	X	X	X	Distal Intergenic	1	97561479	97788511	227033	1	100873932	uc031pne.1	-104796	ENSG00000232878	DPYD-AS1	DPYD antisense RNA 1
chr1	97463384	97463533		X		Distal Intergenic	1	97561479	97788511	227033	1	100873932	uc031pne.1	-97946	ENSG00000232878	DPYD-AS1	DPYD antisense RNA 1
chr1	97483583	97483732		X		Distal Intergenic	1	97561479	97788511	227033	1	100873932	uc031pne.1	-77747	ENSG00000232878	DPYD-AS1	DPYD antisense RNA 1
chr1	97974495	97974644		X		"Intron (uc001drv.3/1806, intron 13 of 22)"	1	97543300	98386615	843316	2	1806	uc001drv.3	411971	ENSG00000188641	DPYD	dihydropyrimidine dehydrogenase
chr1	98056192	98056341		X		"Intron (uc001drv.3/1806, intron 10 of 22)"	1	97543300	98386615	843316	2	1806	uc001drv.3	330274	ENSG00000188641	DPYD	dihydropyrimidine dehydrogenase
chr1	98096679	98096828		X		"Intron (uc001drv.3/1806, intron 8 of 22)"	1	97543300	98386615	843316	2	1806	uc001drv.3	289787	ENSG00000188641	DPYD	dihydropyrimidine dehydrogenase
chr1	98100560	98100709	X	X		"Intron (uc001drv.3/1806, intron 8 of 22)"	1	97543300	98386615	843316	2	1806	uc001drv.3	285906	ENSG00000188641	DPYD	dihydropyrimidine dehydrogenase
chr1	98129226	98129375		X		"Intron (uc001drv.3/1806, intron 8 of 22)"	1	97543300	98386615	843316	2	1806	uc001drv.3	257240	ENSG00000188641	DPYD	dihydropyrimidine dehydrogenase
chr1	98386484	98386633		X		Promoter (<=1kb)	1	97543300	98386615	843316	2	1806	uc001drv.3	0	ENSG00000188641	DPYD	dihydropyrimidine dehydrogenase
chr1	98396157	98396306		X		Promoter (9-10kb)	1	98185314	98386615	201302	2	1806	uc001drw.3	-9542	ENSG00000188641	DPYD	dihydropyrimidine dehydrogenase
chr1	98519722	98519871		X		Promoter (4-5kb)	1	98453556	98515249	61694	2	400765	uc001drx.2	-4473	ENSG00000225206	MIR137HG	MIR137 host gene
chr1	98670978	98671127		X		Promoter (5-6kb)	1	98676267	98738214	61948	1	729987	uc031pnf.1	-5140	ENSG00000226053	LINC01776	long intergenic non-protein coding RNA 1776
chr1	98789514	98789663		X		Distal Intergenic	1	98676267	98738214	61948	1	729987	uc031pnf.1	113247	ENSG00000226053	LINC01776	long intergenic non-protein coding RNA 1776
chr1	98903194	98903336		X	X	Distal Intergenic	1	99127236	99226056	98821	1	51375	uc001dsa.3	-223900	ENSG00000162627	SNX7	sorting nexin 7
chr1	99054677	99054826		X		Distal Intergenic	1	99127236	99226056	98821	1	51375	uc001dsa.3	-72410	ENSG00000162627	SNX7	sorting nexin 7
chr1	99127170	99127319		X		Promoter (<=1kb)	1	99127236	99226056	98821	1	51375	uc001dsa.3	0	ENSG00000162627	SNX7	sorting nexin 7
chr1	99198945	99199094		X		"Intron (uc001dsa.3/51375, intron 8 of 8)"	1	99127236	99226056	98821	1	51375	uc010oud.2	71709	ENSG00000162627	SNX7	sorting nexin 7
chr1	99309189	99309338		X		Distal Intergenic	1	99469832	99614408	144577	1	100129620	uc001dsd.1	-160494	ENSG00000232825	LOC100129620	uncharacterized LOC100129620
chr1	99319837	99319981		X	X	Distal Intergenic	1	99469832	99614408	144577	1	100129620	uc001dsd.1	-149851	ENSG00000232825	LOC100129620	uncharacterized LOC100129620
chr1	99484054	99484203		X		"Intron (uc001dsd.1/100129620, intron 1 of 2)"	1	99355801	99470449	114649	2	163404	uc001dsc.3	-13605	ENSG00000117598	PLPPR5	phospholipid phosphatase related 5
chr1	99745139	99745288		X		"Intron (uc001dse.3/9890, intron 1 of 6)"	1	99729848	99775138	45291	1	9890	uc010oue.2	15291	ENSG00000117600	PLPPR4	phospholipid phosphatase related 4
chr1	99905227	99905376		X		Distal Intergenic	1	99729848	99775138	45291	1	9890	uc010oue.2	175379	ENSG00000117600	PLPPR4	phospholipid phosphatase related 4
chr1	99992818	99992967		X		Distal Intergenic	1	100111431	100160097	48667	1	54873	uc001dsg.3	-118464	ENSG00000099260	PALMD	palmdelphin
chr1	100052612	100052761		X		Distal Intergenic	1	100111431	100160097	48667	1	54873	uc001dsg.3	-58670	ENSG00000099260	PALMD	palmdelphin
chr1	100111936	100112085		X		Promoter (<=1kb)	1	100111431	100160097	48667	1	54873	uc001dsg.3	505	ENSG00000099260	PALMD	palmdelphin
chr1	100293610	100293759		X		Distal Intergenic	1	100315640	100389579	73940	1	178	uc001dsi.1	-21881	ENSG00000162688	AGL	"amylo-alpha-1, 6-glucosidase, 4-alpha-glucanotransferase"
chr1	100301777	100301926		X		Distal Intergenic	1	100315640	100389579	73940	1	178	uc001dsi.1	-13714	ENSG00000162688	AGL	"amylo-alpha-1, 6-glucosidase, 4-alpha-glucanotransferase"
chr1	100409098	100409213	X	X		Distal Intergenic	1	100435345	100492534	57190	1	23443	uc001dsp.2	-26132	ENSG00000117620	SLC35A3	solute carrier family 35 member A3
chr1	100409214	100409247	X	X	X	Distal Intergenic	1	100435345	100492534	57190	1	23443	uc001dsp.2	-26098	ENSG00000117620	SLC35A3	solute carrier family 35 member A3
chr1	100410147	100410285	X	X	X	Distal Intergenic	1	100435345	100492534	57190	1	23443	uc001dsp.2	-25060	ENSG00000117620	SLC35A3	solute carrier family 35 member A3
chr1	100410286	100410296	X	X		Distal Intergenic	1	100435345	100492534	57190	1	23443	uc001dsp.2	-25049	ENSG00000117620	SLC35A3	solute carrier family 35 member A3
chr1	100416142	100416291		X		Distal Intergenic	1	100435345	100492534	57190	1	23443	uc001dsp.2	-19054	ENSG00000117620	SLC35A3	solute carrier family 35 member A3
chr1	100424997	100425146		X		Distal Intergenic	1	100435345	100492534	57190	1	23443	uc001dsp.2	-10199	ENSG00000117620	SLC35A3	solute carrier family 35 member A3
chr1	100503544	100503693		X		Promoter (<=1kb)	1	100503789	100548929	45141	1	64645	uc001dst.3	-96	ENSG00000156875	MFSD14A	major facilitator superfamily domain containing 14A
chr1	100514314	100514414		X	X	"Intron (uc001dst.3/64645, intron 1 of 11)"	1	100503789	100548929	45141	1	64645	uc001dst.3	10525	ENSG00000156875	MFSD14A	major facilitator superfamily domain containing 14A
chr1	100598557	100598706		X		Promoter (<=1kb)	1	100598706	100616054	17349	1	54482	uc001dsv.3	0	ENSG00000122435	TRMT13	tRNA methyltransferase 13 homolog
chr1	100803565	100803702	X	X	X	Promoter (6-7kb)	1	100810584	100963763	153180	1	8556	uc009web.2	-6882	ENSG00000079335	CDC14A	cell division cycle 14A
chr1	100803703	100803714	X	X		Promoter (6-7kb)	1	100810584	100963763	153180	1	8556	uc009web.2	-6870	ENSG00000079335	CDC14A	cell division cycle 14A
chr1	100816803	100816952		X		Promoter (1-2kb)	1	100818023	100856616	38594	1	8556	uc009wec.1	-1071	ENSG00000079335	CDC14A	cell division cycle 14A
chr1	100817785	100817934		X		Promoter (<=1kb)	1	100818023	100856616	38594	1	8556	uc009wec.1	-89	ENSG00000079335	CDC14A	cell division cycle 14A
chr1	100905786	100905935		X		"Intron (uc009web.2/8556, intron 5 of 13)"	1	100818023	100985833	167811	1	8556	uc009wee.3	87763	ENSG00000079335	CDC14A	cell division cycle 14A
chr1	101103275	101103424		X		"Intron (uc021oqr.1/100128787, intron 3 of 4)"	1	101092606	101112560	19955	2	100128787	uc021oqr.1	9136	NA	LINC01349	long intergenic non-protein coding RNA 1349
chr1	101123538	101123687	X	X		Distal Intergenic	1	101092606	101112560	19955	2	100128787	uc021oqr.1	-10978	NA	LINC01349	long intergenic non-protein coding RNA 1349
chr1	101185129	101185278		X		Promoter (<=1kb)	1	101185196	101204601	19406	1	7412	uc001dti.3	0	ENSG00000162692	VCAM1	vascular cell adhesion molecule 1
chr1	101251403	101251552		X		Distal Intergenic	1	101185196	101204601	19406	1	7412	uc010ouj.2	66207	ENSG00000162692	VCAM1	vascular cell adhesion molecule 1
chr1	101361471	101361620		X		Promoter (<=1kb)	1	101361632	101447311	85680	1	148867	uc001dtn.2	-12	ENSG00000162695	SLC30A7	solute carrier family 30 member 7
chr1	101702399	101702548		X		Promoter (<=1kb)	1	101702459	101707076	4618	1	1901	uc009weg.2	0	ENSG00000170989	S1PR1	sphingosine-1-phosphate receptor 1
chr1	101723646	101723795		X		Distal Intergenic	1	101702459	101707076	4618	1	1901	uc009weg.2	21187	ENSG00000170989	S1PR1	sphingosine-1-phosphate receptor 1
chr1	101749125	101749274		X		Distal Intergenic	1	101702459	101707076	4618	1	1901	uc009weg.2	46666	ENSG00000170989	S1PR1	sphingosine-1-phosphate receptor 1
chr1	101757212	101757361		X		Distal Intergenic	1	101806425	101806451	27	2	100873740	uc031pni.1	49090	NA	RNU6-31P	"RNA, U6 small nuclear 31, pseudogene"
chr1	101764912	101765061	X	X		Distal Intergenic	1	101806425	101806451	27	2	100873740	uc031pni.1	41390	NA	RNU6-31P	"RNA, U6 small nuclear 31, pseudogene"
chr1	101775249	101775398		X		Distal Intergenic	1	101806425	101806451	27	2	100873740	uc031pni.1	31053	NA	RNU6-31P	"RNA, U6 small nuclear 31, pseudogene"
chr1	101814080	101814229		X		Promoter (7-8kb)	1	101806425	101806451	27	2	100873740	uc031pni.1	-7629	NA	RNU6-31P	"RNA, U6 small nuclear 31, pseudogene"
chr1	101847782	101847931		X		Distal Intergenic	1	101806425	101806451	27	2	100873740	uc031pni.1	-41331	NA	RNU6-31P	"RNA, U6 small nuclear 31, pseudogene"
chr1	101876565	101876714		X		Distal Intergenic	1	101806425	101806451	27	2	100873740	uc031pni.1	-70114	NA	RNU6-31P	"RNA, U6 small nuclear 31, pseudogene"
chr1	101910587	101910736		X		Distal Intergenic	1	101806425	101806451	27	2	100873740	uc031pni.1	-104136	NA	RNU6-31P	"RNA, U6 small nuclear 31, pseudogene"
chr1	101947954	101948103		X		Distal Intergenic	1	101806425	101806451	27	2	100873740	uc031pni.1	-141503	NA	RNU6-31P	"RNA, U6 small nuclear 31, pseudogene"
chr1	102066340	102066485		X	X	Distal Intergenic	1	102268127	102312600	44474	2	118427	uc001due.2	246115	ENSG00000118733	OLFM3	olfactomedin 3
chr1	102119072	102119221		X		Distal Intergenic	1	102268127	102312600	44474	2	118427	uc001due.2	193379	ENSG00000118733	OLFM3	olfactomedin 3
chr1	102149223	102149372		X		Distal Intergenic	1	102268127	102312600	44474	2	118427	uc001due.2	163228	ENSG00000118733	OLFM3	olfactomedin 3
chr1	102199050	102199199		X		Distal Intergenic	1	102268127	102312600	44474	2	118427	uc001due.2	113401	ENSG00000118733	OLFM3	olfactomedin 3
chr1	102253711	102253860		X		Distal Intergenic	1	102268127	102312600	44474	2	118427	uc001due.2	58740	ENSG00000118733	OLFM3	olfactomedin 3
chr1	102372904	102373053		X		"Intron (uc001dug.2/118427, intron 1 of 5)"	1	102337567	102360299	22733	1	94236	uc021oqv.1	35337	NA	DNAJA1P5	DnaJ heat shock protein family (Hsp40) member A1 pseudogene 5
chr1	102462469	102462618		X		Promoter (<=1kb)	1	102268127	102462790	194664	2	118427	uc001dug.2	172	ENSG00000118733	OLFM3	olfactomedin 3
chr1	102651453	102651602		X		Distal Intergenic	1	102268127	102462790	194664	2	118427	uc001duj.2	-188663	ENSG00000118733	OLFM3	olfactomedin 3
chr1	102676799	102676948		X		Distal Intergenic	1	102268127	102462790	194664	2	118427	uc001duj.2	-214009	ENSG00000118733	OLFM3	olfactomedin 3
chr1	102718627	102718776		X		Distal Intergenic	1	102268127	102462790	194664	2	118427	uc001duj.2	-255837	ENSG00000118733	OLFM3	olfactomedin 3
chr1	103016397	103016546		X		Distal Intergenic	1	103342023	103496800	154778	2	1301	uc001duk.3	480254	ENSG00000060718	COL11A1	collagen type XI alpha 1 chain
chr1	103223017	103223166		X		Distal Intergenic	1	103342023	103496800	154778	2	1301	uc001duk.3	273634	ENSG00000060718	COL11A1	collagen type XI alpha 1 chain
chr1	103240655	103240804	X	X		Distal Intergenic	1	103342023	103496800	154778	2	1301	uc001duk.3	255996	ENSG00000060718	COL11A1	collagen type XI alpha 1 chain
chr1	103241752	103241901		X		Distal Intergenic	1	103342023	103496800	154778	2	1301	uc001duk.3	254899	ENSG00000060718	COL11A1	collagen type XI alpha 1 chain
chr1	103483895	103484044		X		"Intron (uc001duk.3/1301, intron 6 of 63)"	1	103342023	103496800	154778	2	1301	uc001duk.3	12756	ENSG00000060718	COL11A1	collagen type XI alpha 1 chain
chr1	103508079	103508228		X		"Intron (uc001dul.3/1301, intron 4 of 66)"	1	103342023	103496800	154778	2	1301	uc001duk.3	-11279	ENSG00000060718	COL11A1	collagen type XI alpha 1 chain
chr1	103523496	103523645		X		"Intron (uc001dul.3/1301, intron 4 of 66)"	1	103342023	103496800	154778	2	1301	uc001duk.3	-26696	ENSG00000060718	COL11A1	collagen type XI alpha 1 chain
chr1	103574101	103574250		X		Promoter (<=1kb)	1	103342023	103574052	232030	2	1301	uc009weh.3	-49	ENSG00000060718	COL11A1	collagen type XI alpha 1 chain
chr1	104068260	104068409		X		Promoter (<=1kb)	1	104068578	104096306	27729	1	55599	uc010oul.1	-169	ENSG00000185946	RNPC3	"RNA binding region (RNP1, RRM) containing 3"
chr1	104641452	104641601		X		Distal Intergenic	1	104615645	104619693	4049	1	100129138	uc021oqw.1	25807	ENSG00000215869	LOC100129138	THAP domain containing 3 pseudogene
chr1	104677477	104677626		X		Distal Intergenic	1	104615645	104619693	4049	1	100129138	uc021oqw.1	61832	ENSG00000215869	LOC100129138	THAP domain containing 3 pseudogene
chr1	104777877	104778026		X		Distal Intergenic	1	104615645	104619693	4049	1	100129138	uc021oqw.1	162232	ENSG00000215869	LOC100129138	THAP domain containing 3 pseudogene
chr1	104779286	104779435		X		Distal Intergenic	1	104615645	104619693	4049	1	100129138	uc021oqw.1	163641	ENSG00000215869	LOC100129138	THAP domain containing 3 pseudogene
chr1	104801497	104801646		X		Distal Intergenic	1	104615645	104619693	4049	1	100129138	uc021oqw.1	185852	ENSG00000215869	LOC100129138	THAP domain containing 3 pseudogene
chr1	104801958	104802107	X	X		Distal Intergenic	1	104615645	104619693	4049	1	100129138	uc021oqw.1	186313	ENSG00000215869	LOC100129138	THAP domain containing 3 pseudogene
chr1	104802486	104802634	X	X	X	Distal Intergenic	1	104615645	104619693	4049	1	100129138	uc021oqw.1	186841	ENSG00000215869	LOC100129138	THAP domain containing 3 pseudogene
chr1	104802635	104802635	X	X		Distal Intergenic	1	104615645	104619693	4049	1	100129138	uc021oqw.1	186990	ENSG00000215869	LOC100129138	THAP domain containing 3 pseudogene
chr1	104957180	104957329		X		Distal Intergenic	1	104615645	104619693	4049	1	100129138	uc021oqw.1	341535	ENSG00000215869	LOC100129138	THAP domain containing 3 pseudogene
chr1	105163944	105164093		X		Distal Intergenic	1	104615645	104619693	4049	1	100129138	uc021oqw.1	548299	ENSG00000215869	LOC100129138	THAP domain containing 3 pseudogene
chr1	105164641	105164790		X		Distal Intergenic	1	104615645	104619693	4049	1	100129138	uc021oqw.1	548996	ENSG00000215869	LOC100129138	THAP domain containing 3 pseudogene
chr1	105214747	105214896		X		Distal Intergenic	1	104615645	104619693	4049	1	100129138	uc021oqw.1	599102	ENSG00000215869	LOC100129138	THAP domain containing 3 pseudogene
chr1	105248210	105248359		X		Distal Intergenic	1	104615645	104619693	4049	1	100129138	uc021oqw.1	632565	ENSG00000215869	LOC100129138	THAP domain containing 3 pseudogene
chr1	105421243	105421392		X		Distal Intergenic	1	104615645	104619693	4049	1	100129138	uc021oqw.1	805598	ENSG00000215869	LOC100129138	THAP domain containing 3 pseudogene
chr1	105645103	105645252		X		Distal Intergenic	1	104615645	104619693	4049	1	100129138	uc021oqw.1	1029458	ENSG00000215869	LOC100129138	THAP domain containing 3 pseudogene
chr1	105680186	105680335		X		Distal Intergenic	1	104615645	104619693	4049	1	100129138	uc021oqw.1	1064541	ENSG00000215869	LOC100129138	THAP domain containing 3 pseudogene
chr1	106128424	106128573		X		Distal Intergenic	1	107599267	107601916	2650	1	55170	uc010ous.2	-1470694	ENSG00000198890	PRMT6	protein arginine methyltransferase 6
chr1	106175598	106175600	X	X		Distal Intergenic	1	107599267	107601916	2650	1	55170	uc010ous.2	-1423667	ENSG00000198890	PRMT6	protein arginine methyltransferase 6
chr1	106175601	106175747	X	X	X	Distal Intergenic	1	107599267	107601916	2650	1	55170	uc010ous.2	-1423520	ENSG00000198890	PRMT6	protein arginine methyltransferase 6
chr1	106427170	106427319		X		Distal Intergenic	1	107599267	107601916	2650	1	55170	uc010ous.2	-1171948	ENSG00000198890	PRMT6	protein arginine methyltransferase 6
chr1	106452561	106452710		X		Distal Intergenic	1	107599267	107601916	2650	1	55170	uc010ous.2	-1146557	ENSG00000198890	PRMT6	protein arginine methyltransferase 6
chr1	106456658	106456807		X		Distal Intergenic	1	107599267	107601916	2650	1	55170	uc010ous.2	-1142460	ENSG00000198890	PRMT6	protein arginine methyltransferase 6
chr1	106868327	106868476		X		Distal Intergenic	1	107599267	107601916	2650	1	55170	uc010ous.2	-730791	ENSG00000198890	PRMT6	protein arginine methyltransferase 6
chr1	106950123	106950272		X		Distal Intergenic	1	107599267	107601916	2650	1	55170	uc010ous.2	-648995	ENSG00000198890	PRMT6	protein arginine methyltransferase 6
chr1	107067409	107067558		X		Distal Intergenic	1	107599267	107601916	2650	1	55170	uc010ous.2	-531709	ENSG00000198890	PRMT6	protein arginine methyltransferase 6
chr1	107076069	107076218		X		Distal Intergenic	1	107599267	107601916	2650	1	55170	uc010ous.2	-523049	ENSG00000198890	PRMT6	protein arginine methyltransferase 6
chr1	107107121	107107270		X		Distal Intergenic	1	107599267	107601916	2650	1	55170	uc010ous.2	-491997	ENSG00000198890	PRMT6	protein arginine methyltransferase 6
chr1	107232148	107232297		X		Distal Intergenic	1	107599267	107601916	2650	1	55170	uc010ous.2	-366970	ENSG00000198890	PRMT6	protein arginine methyltransferase 6
chr1	107407456	107407605		X		Distal Intergenic	1	107599267	107601916	2650	1	55170	uc010ous.2	-191662	ENSG00000198890	PRMT6	protein arginine methyltransferase 6
chr1	107431807	107431956		X		Distal Intergenic	1	107599267	107601916	2650	1	55170	uc010ous.2	-167311	ENSG00000198890	PRMT6	protein arginine methyltransferase 6
chr1	107492874	107493023		X		Distal Intergenic	1	107599267	107601916	2650	1	55170	uc010ous.2	-106244	ENSG00000198890	PRMT6	protein arginine methyltransferase 6
chr1	107509255	107509404		X		Distal Intergenic	1	107599267	107601916	2650	1	55170	uc010ous.2	-89863	ENSG00000198890	PRMT6	protein arginine methyltransferase 6
chr1	107762592	107762741		X		"Intron (uc001dvc.4/22854, intron 2 of 5)"	1	107683549	107953207	269659	1	22854	uc001dvd.1	79043	ENSG00000162631	NTNG1	netrin G1
chr1	108098340	108098489		X		Distal Intergenic	1	108113782	108220631	106850	2	10451	uc010ouu.1	122142	ENSG00000134215	VAV3	vav guanine nucleotide exchange factor 3
chr1	108194594	108194743		X		"Intron (uc010ouu.1/10451, intron 1 of 9)"	1	108113782	108220631	106850	2	10451	uc010ouu.1	25888	ENSG00000134215	VAV3	vav guanine nucleotide exchange factor 3
chr1	108407474	108407623		X		"Intron (uc001dvk.1/10451, intron 2 of 26)"	1	108211463	108506218	294756	2	10451	uc001dvl.1	98595	ENSG00000134215	VAV3	vav guanine nucleotide exchange factor 3
chr1	108408403	108408483		X	X	"Intron (uc001dvk.1/10451, intron 2 of 26)"	1	108211463	108506218	294756	2	10451	uc001dvl.1	97735	ENSG00000134215	VAV3	vav guanine nucleotide exchange factor 3
chr1	108437486	108437635		X		"Intron (uc001dvk.1/10451, intron 1 of 26)"	1	108211463	108506218	294756	2	10451	uc001dvl.1	68583	ENSG00000134215	VAV3	vav guanine nucleotide exchange factor 3
chr1	108507322	108507457		X	X	Promoter (<=1kb)	1	108113782	108507545	393764	2	10451	uc001dvk.1	88	ENSG00000134215	VAV3	vav guanine nucleotide exchange factor 3
chr1	108507843	108507992		X		Promoter (<=1kb)	1	108211463	108507545	296083	2	10451	uc010oux.1	-298	ENSG00000134215	VAV3	vav guanine nucleotide exchange factor 3
chr1	108559170	108559319		X		Distal Intergenic	1	108211463	108507545	296083	2	10451	uc010oux.1	-51625	ENSG00000134215	VAV3	vav guanine nucleotide exchange factor 3
chr1	108575435	108575584		X		Distal Intergenic	1	108211463	108507545	296083	2	10451	uc010oux.1	-67890	ENSG00000134215	VAV3	vav guanine nucleotide exchange factor 3
chr1	108593618	108593767		X		Distal Intergenic	1	108211463	108507545	296083	2	10451	uc010oux.1	-86073	ENSG00000134215	VAV3	vav guanine nucleotide exchange factor 3
chr1	108594703	108594852	X	X		Distal Intergenic	1	108211463	108507545	296083	2	10451	uc010oux.1	-87158	ENSG00000134215	VAV3	vav guanine nucleotide exchange factor 3
chr1	108622287	108622436		X		Distal Intergenic	1	108677344	108735431	58088	2	29957	uc001dvm.4	112995	ENSG00000085491	SLC25A24	solute carrier family 25 member 24
chr1	109045865	109046014		X		Distal Intergenic	1	108992904	109013260	20357	1	653149	uc009weq.3	52961	ENSG00000186086	NBPF6	NBPF member 6
chr1	109102499	109102648		X		Promoter (<=1kb)	1	109102971	109181949	78979	1	284611	uc010ouy.2	-323	ENSG00000162636	FAM102B	family with sequence similarity 102 member B
chr1	109103046	109103195		X		Promoter (<=1kb)	1	109102971	109181949	78979	1	284611	uc010ouy.2	75	ENSG00000162636	FAM102B	family with sequence similarity 102 member B
chr1	109234832	109234981		X		Promoter (<=1kb)	1	109234932	109244422	9491	1	55119	uc001dvv.4	0	ENSG00000134186	PRPF38B	pre-mRNA processing factor 38B
chr1	109289213	109289362		X		Promoter (<=1kb)	1	109289285	109319053	29769	1	6814	uc021oqz.1	0	ENSG00000116266	STXBP3	syntaxin binding protein 3
chr1	109385233	109385374		X	X	"Intron (uc001dwa.4/254268, intron 6 of 15)"	1	109358520	109399726	41207	2	254268	uc001dwa.4	14352	ENSG00000162641	AKNAD1	AKNA domain containing 1
chr1	109388116	109388265		X		"Intron (uc001dwa.4/254268, intron 5 of 15)"	1	109358520	109399726	41207	2	254268	uc001dwa.4	11461	ENSG00000162641	AKNAD1	AKNA domain containing 1
chr1	109388826	109388975		X		"Intron (uc001dwa.4/254268, intron 5 of 15)"	1	109358520	109399726	41207	2	254268	uc001dwa.4	10751	ENSG00000162641	AKNAD1	AKNA domain containing 1
chr1	109419543	109419692		X		Promoter (<=1kb)	1	109419603	109473044	53442	1	29899	uc010ovc.2	0	ENSG00000121957	GPSM2	G protein signaling modulator 2
chr1	109584675	109584824		X		Promoter (<=1kb)	1	109512838	109584850	72013	2	22911	uc001dwi.3	26	ENSG00000085433	WDR47	WD repeat domain 47
chr1	109719086	109719235			X	Promoter (9-10kb)	1	109729171	109749403	20233	1	57535	uc031pnl.1	-9936	ENSG00000116299	KIAA1324	KIAA1324
chr1	109723999	109724140	X	X	X	Promoter (5-6kb)	1	109729171	109749403	20233	1	57535	uc031pnl.1	-5031	ENSG00000116299	KIAA1324	KIAA1324
chr1	109724141	109724148	X	X		Promoter (5-6kb)	1	109729171	109749403	20233	1	57535	uc031pnl.1	-5023	ENSG00000116299	KIAA1324	KIAA1324
chr1	109772491	109772640		X		"Intron (uc001dwu.2/6301, intron 4 of 10)"	1	109756515	109780804	24290	1	6301	uc001dwu.2	15976	ENSG00000031698	SARS	seryl-tRNA synthetase
chr1	109825803	109825952		X		Promoter (<=1kb)	1	109822176	109825808	3633	2	84722	uc001dxj.3	0	ENSG00000134222	PSRC1	proline and serine rich coiled-coil 1
chr1	109940633	109940782		X		Promoter (<=1kb)	1	109852188	109940563	88376	2	6272	uc001dxm.2	-70	ENSG00000134243	SORT1	sortilin 1
chr1	109986159	109986308		X		Distal Intergenic	1	109941653	109969108	27456	2	5686	uc021ore.1	-17051	ENSG00000143106	PSMA5	proteasome subunit alpha 5
chr1	110009115	110009264			X	Promoter (<=1kb)	1	110009100	110024764	15665	1	284612	uc010ovk.2	15	ENSG00000143028	SYPL2	synaptophysin like 2
chr1	110026739	110026888			X	Promoter (<=1kb)	1	110026561	110035420	8860	1	127002	uc001dxr.3	178	ENSG00000162650	ATXN7L2	ataxin 7 like 2
chr1	110052343	110052492			X	Promoter (<=1kb)	1	110049446	110052336	2891	2	57463	uc001dxx.4	-7	ENSG00000181754	AMIGO1	adhesion molecule with Ig like domain 1
chr1	110274470	110274619	X	X		Downstream (1-2kb)	1	110280001	110283133	3133	2	2947	uc010ovv.2	8514	ENSG00000134202	GSTM3	glutathione S-transferase mu 3
chr1	110303422	110303565		X	X	"Intron (uc001dyq.2/79574, intron 3 of 18)"	1	110292702	110306644	13943	2	79574	uc001dyq.2	3079	ENSG00000198758	EPS8L3	EPS8 like 3
chr1	110303867	110304016	X	X		Promoter (2-3kb)	1	110292702	110306644	13943	2	79574	uc001dyq.2	2628	ENSG00000198758	EPS8L3	EPS8 like 3
chr1	110400470	110400619		X		Distal Intergenic	1	110453233	110467824	14592	1	1435	uc001dyt.2	-52614	ENSG00000184371	CSF1	colony stimulating factor 1
chr1	110453500	110453649	X			Promoter (<=1kb)	1	110453233	110473616	20384	1	1435	uc021orj.2	267	ENSG00000184371	CSF1	colony stimulating factor 1
chr1	110496900	110497049	X	X		Distal Intergenic	1	110527387	110566364	38978	1	10768	uc001dyx.3	-30338	ENSG00000168710	AHCYL1	adenosylhomocysteinase like 1
chr1	110527228	110527377		X		Promoter (<=1kb)	1	110527387	110566364	38978	1	10768	uc001dyx.3	-10	ENSG00000168710	AHCYL1	adenosylhomocysteinase like 1
chr1	110601901	110602050	X	X		Downstream (<1kb)	1	110602997	110613322	10326	2	257	uc001dzb.3	11272	ENSG00000156150	ALX3	ALX homeobox 3
chr1	110632349	110632498		X		Distal Intergenic	1	110602997	110613322	10326	2	257	uc001dzb.3	-19027	ENSG00000156150	ALX3	ALX homeobox 3
chr1	110678027	110678176			X	Distal Intergenic	1	110693132	110744823	51692	1	388662	uc009wfq.3	-14956	ENSG00000197106	SLC6A17	solute carrier family 6 member 17
chr1	110752681	110752824		X	X	Promoter (<=1kb)	1	110753336	110766705	13370	1	3749	uc001dzf.3	-512	ENSG00000116396	KCNC4	potassium voltage-gated channel subfamily C member 4
chr1	110758428	110758577			X	"Intron (uc001dzf.3/3749, intron 1 of 1)"	1	110753336	110776674	23339	1	3749	uc001dzi.3	5092	ENSG00000116396	KCNC4	potassium voltage-gated channel subfamily C member 4
chr1	110843232	110843381		X		"Intron (uc001dzj.3/440600, intron 2 of 3)"	1	110828999	110881793	52795	2	440600	uc001dzj.3	38412	ENSG00000227963	RBM15-AS1	RBM15 antisense RNA 1
chr1	110881831	110881980		X		Promoter (<=1kb)	1	110881945	110889303	7359	1	64783	uc001dzl.1	0	ENSG00000162775	RBM15	RNA binding motif protein 15
chr1	111149151	111149300		X		Promoter (<=1kb)	1	111145776	111148975	3200	2	3737	uc009wfw.3	-176	ENSG00000177301	KCNA2	potassium voltage-gated channel subfamily A member 2
chr1	111217522	111217671		X		Promoter (<=1kb)	1	111214310	111217655	3346	2	3738	uc001dzv.1	0	ENSG00000177272	KCNA3	potassium voltage-gated channel subfamily A member 3
chr1	111249575	111249724	X	X		Distal Intergenic	1	111214310	111217655	3346	2	3738	uc001dzv.1	-31920	ENSG00000177272	KCNA3	potassium voltage-gated channel subfamily A member 3
chr1	111251595	111251735		X	X	Distal Intergenic	1	111214310	111217655	3346	2	3738	uc001dzv.1	-33940	ENSG00000177272	KCNA3	potassium voltage-gated channel subfamily A member 3
chr1	111393507	111393656	X	X		Distal Intergenic	1	111413821	111442558	28738	1	963	uc001dzw.3	-20165	ENSG00000143119	CD53	CD53 molecule
chr1	111506603	111506752		X		Promoter (<=1kb)	1	111489812	111506566	16755	2	55791	uc001eab.3	-37	ENSG00000121931	LRIF1	ligand dependent nuclear receptor interacting factor 1
chr1	111704673	111704822		X		"Intron (uc001eah.1/10390, intron 4 of 8)"	1	111659954	111682838	22885	2	128338	uc009wfy.3	-21835	ENSG00000156171	DRAM2	DNA damage regulated autophagy modulator 2
chr1	111757305	111757453	X	X	X	Distal Intergenic	1	111728591	111747160	18570	2	79961	uc001eal.2	-10145	ENSG00000162777	DENND2D	DENN domain containing 2D
chr1	111757454	111757454	X	X		Distal Intergenic	1	111728591	111747160	18570	2	79961	uc001eal.2	-10294	ENSG00000162777	DENND2D	DENN domain containing 2D
chr1	111762221	111762356		X	X	Promoter (7-8kb)	1	111770281	111786062	15782	1	1117	uc001eam.3	-7925	ENSG00000064886	CHI3L2	chitinase 3 like 2
chr1	111778648	111778797	X	X		"Exon (uc001eam.3/1117, exon 7 of 11)"	1	111772333	111786062	13730	1	1117	uc001eao.3	6315	ENSG00000064886	CHI3L2	chitinase 3 like 2
chr1	111822480	111822595	X	X	X	Promoter (<=1kb)	1	111823146	111828730	5585	1	149620	uc009wgb.3	-551	ENSG00000203878	CHIAP2	"chitinase, acidic pseudogene 2"
chr1	111822596	111822629	X	X		Promoter (<=1kb)	1	111823146	111828730	5585	1	149620	uc009wgb.3	-517	ENSG00000203878	CHIAP2	"chitinase, acidic pseudogene 2"
chr1	111829661	111829759		X	X	Promoter (3-4kb)	1	111833474	111863188	29715	1	27159	uc001eaq.4	-3715	ENSG00000134216	CHIA	"chitinase, acidic"
chr1	111847963	111848110	X	X	X	"Intron (uc001eaq.4/27159, intron 1 of 10)"	1	111833474	111863188	29715	1	27159	uc009wgd.4	14489	ENSG00000134216	CHIA	"chitinase, acidic"
chr1	111848111	111848112	X	X		"Intron (uc001eaq.4/27159, intron 1 of 10)"	1	111833474	111863188	29715	1	27159	uc009wgd.4	14637	ENSG00000134216	CHIA	"chitinase, acidic"
chr1	111863681	111863830		X		Distal Intergenic	1	111889195	111895639	6445	1	128344	uc001eaw.2	-25365	ENSG00000173947	PIFO	primary cilia formation
chr1	111902696	111902845		X		Distal Intergenic	1	111889195	111895639	6445	1	128344	uc009wge.1	13501	ENSG00000173947	PIFO	primary cilia formation
chr1	111907438	111907587		X		Distal Intergenic	1	111889195	111895639	6445	1	128344	uc009wge.1	18243	ENSG00000173947	PIFO	primary cilia formation
chr1	111991858	111992007		X		Promoter (<=1kb)	1	111983819	111991830	8012	2	79084	uc021orq.1	-28	ENSG00000116455	WDR77	WD repeat domain 77
chr1	112094756	112094886	X	X	X	"Intron (uc001ebi.3/5906, intron 1 of 7)"	1	112085055	112256101	171047	1	5906	uc001ebi.3	9701	ENSG00000116473	RAP1A	"RAP1A, member of RAS oncogene family"
chr1	112094887	112094905	X	X		"Intron (uc001ebi.3/5906, intron 1 of 7)"	1	112085055	112256101	171047	1	5906	uc001ebi.3	9832	ENSG00000116473	RAP1A	"RAP1A, member of RAS oncogene family"
chr1	112119279	112119428		X		"Intron (uc001ebi.3/5906, intron 1 of 7)"	1	112025970	112106597	80628	2	140	uc001ebg.4	-12682	ENSG00000282608	ADORA3	adenosine A3 receptor
chr1	112182646	112182795			X	"Intron (uc001ebi.3/5906, intron 1 of 7)"	1	112162405	112256101	93697	1	5906	uc001ebl.3	20241	ENSG00000116473	RAP1A	"RAP1A, member of RAS oncogene family"
chr1	112281141	112281290		X		Promoter (<=1kb)	1	112264686	112282046	17361	2	55924	uc001ebo.2	756	ENSG00000197852	FAM212B	family with sequence similarity 212 member B
chr1	112282040	112282189		X		Promoter (<=1kb)	1	112264686	112282046	17361	2	55924	uc001ebo.2	0	ENSG00000197852	FAM212B	family with sequence similarity 212 member B
chr1	112404245	112404394		X		"Intron (uc001ebu.1/3752, intron 2 of 7)"	1	112303019	112310199	7181	1	11218	uc001ebt.3	101226	ENSG00000064703	DDX20	DEAD-box helicase 20
chr1	112561562	112561665	X	X	X	Distal Intergenic	1	112533190	112541463	8274	1	643355	uc001ebw.4	28372	ENSG00000231437	LINC01750	long intergenic non-protein coding RNA 1750
chr1	112561666	112561711	X	X		Distal Intergenic	1	112533190	112541463	8274	1	643355	uc001ebw.4	28476	ENSG00000231437	LINC01750	long intergenic non-protein coding RNA 1750
chr1	112562249	112562392		X	X	Distal Intergenic	1	112533190	112541463	8274	1	643355	uc001ebw.4	29059	ENSG00000231437	LINC01750	long intergenic non-protein coding RNA 1750
chr1	112675424	112675573		X		Distal Intergenic	1	112533190	112541463	8274	1	643355	uc001ebw.4	142234	ENSG00000231437	LINC01750	long intergenic non-protein coding RNA 1750
chr1	112764685	112764834		X		Distal Intergenic	1	112938800	113003786	64987	1	55917	uc001ebx.3	-173966	ENSG00000143079	CTTNBP2NL	CTTNBP2 N-terminal like
chr1	112848489	112848491	X	X		Distal Intergenic	1	112938800	113003786	64987	1	55917	uc001ebx.3	-90309	ENSG00000143079	CTTNBP2NL	CTTNBP2 N-terminal like
chr1	112848492	112848638	X	X	X	Distal Intergenic	1	112938800	113003786	64987	1	55917	uc001ebx.3	-90162	ENSG00000143079	CTTNBP2NL	CTTNBP2 N-terminal like
chr1	112850514	112850663			X	Distal Intergenic	1	112938800	113003786	64987	1	55917	uc001ebx.3	-88137	ENSG00000143079	CTTNBP2NL	CTTNBP2 N-terminal like
chr1	112871801	112871946		X	X	Distal Intergenic	1	112938800	113003786	64987	1	55917	uc001ebx.3	-66854	ENSG00000143079	CTTNBP2NL	CTTNBP2 N-terminal like
chr1	112889371	112889520		X		Distal Intergenic	1	112938800	113003786	64987	1	55917	uc001ebx.3	-49280	ENSG00000143079	CTTNBP2NL	CTTNBP2 N-terminal like
chr1	113217244	113217393		X		Promoter (<=1kb)	1	113217470	113239156	21687	1	4343	uc009wgj.1	-77	ENSG00000155363	MOV10	Mov10 RISC complex RNA helicase
chr1	113247744	113247893		X		Promoter (1-2kb)	1	113243749	113249678	5930	2	389	uc001ecp.1	1785	ENSG00000155366	RHOC	ras homolog family member C
chr1	113249982	113250131		X		Promoter (<=1kb)	1	113243749	113250025	6277	2	389	uc001ecq.1	0	ENSG00000155366	RHOC	ras homolog family member C
chr1	113258042	113258191		X		Promoter (<=1kb)	1	113252616	113257950	5335	2	333926	uc001ect.1	-92	ENSG00000155367	PPM1J	"protein phosphatase, Mg2+/Mn2+ dependent 1J"
chr1	113265298	113265447		X		Promoter (2-3kb)	1	113263189	113269856	6668	1	284467	uc010owl.2	2109	ENSG00000184599	FAM19A3	"family with sequence similarity 19 member A3, C-C motif chemokine like"
chr1	113271793	113271942			X	Distal Intergenic	1	113263189	113269856	6668	1	284467	uc010owl.2	8604	ENSG00000184599	FAM19A3	"family with sequence similarity 19 member A3, C-C motif chemokine like"
chr1	113336777	113336926			X	Distal Intergenic	1	113263189	113269856	6668	1	284467	uc010owl.2	73588	ENSG00000184599	FAM19A3	"family with sequence similarity 19 member A3, C-C motif chemokine like"
chr1	113337379	113337528		X		Distal Intergenic	1	113263189	113269856	6668	1	284467	uc010owl.2	74190	ENSG00000184599	FAM19A3	"family with sequence similarity 19 member A3, C-C motif chemokine like"
chr1	113352200	113352349		X		Distal Intergenic	1	113263189	113269856	6668	1	284467	uc010owl.2	89011	ENSG00000184599	FAM19A3	"family with sequence similarity 19 member A3, C-C motif chemokine like"
chr1	113368363	113368512			X	"Intron (uc001ecw.1/uc001ecw.1, intron 4 of 6)"	1	113465972	113467295	1324	1	246182	uc001eda.1	-97460	NA	AKR7A2P1	aldo-keto reductase family 7 member A2 pseudogene 1
chr1	113368893	113369037		X	X	"Intron (uc001ecw.1/uc001ecw.1, intron 4 of 6)"	1	113465972	113467295	1324	1	246182	uc001eda.1	-96935	NA	AKR7A2P1	aldo-keto reductase family 7 member A2 pseudogene 1
chr1	113383962	113384097		X	X	"Intron (uc001ecw.1/uc001ecw.1, intron 2 of 6)"	1	113465972	113467295	1324	1	246182	uc001eda.1	-81875	NA	AKR7A2P1	aldo-keto reductase family 7 member A2 pseudogene 1
chr1	113392248	113392397			X	"Exon (uc001ecw.1/uc001ecw.1, exon 1 of 7)"	1	113465972	113467295	1324	1	246182	uc001eda.1	-73575	NA	AKR7A2P1	aldo-keto reductase family 7 member A2 pseudogene 1
chr1	113421003	113421152			X	Distal Intergenic	1	113465972	113467295	1324	1	246182	uc001eda.1	-44820	NA	AKR7A2P1	aldo-keto reductase family 7 member A2 pseudogene 1
chr1	113498833	113498982		X		Promoter (<=1kb)	1	113454470	113498975	44506	2	6566	uc001ecy.3	0	ENSG00000155380	SLC16A1	solute carrier family 16 member 1
chr1	113540555	113540704		X		"Intron (uc001edc.1/uc001edc.1, intron 2 of 2)"	1	113454470	113498975	44506	2	6566	uc001ecy.3	-41580	ENSG00000155380	SLC16A1	solute carrier family 16 member 1
chr1	113582869	113583018	X	X		"Intron (uc001ede.1/uc001ede.1, intron 2 of 2)"	1	113615831	113667342	51512	1	9860	uc001edf.1	-32813	ENSG00000198799	LRIG2	leucine rich repeats and immunoglobulin like domains 2
chr1	113584383	113584532	X	X	X	"Intron (uc001ede.1/uc001ede.1, intron 2 of 2)"	1	113615831	113667342	51512	1	9860	uc001edf.1	-31299	ENSG00000198799	LRIG2	leucine rich repeats and immunoglobulin like domains 2
chr1	113615649	113615798		X		Promoter (<=1kb)	1	113615831	113667342	51512	1	9860	uc001edf.1	-33	ENSG00000198799	LRIG2	leucine rich repeats and immunoglobulin like domains 2
chr1	113683466	113683615		X		Distal Intergenic	1	113739404	113748875	9472	2	643441	uc001edg.2	65260	NA	LOC643441	uncharacterized LOC643441
chr1	113689555	113689704		X		Distal Intergenic	1	113739404	113748875	9472	2	643441	uc001edg.2	59171	NA	LOC643441	uncharacterized LOC643441
chr1	113701567	113701716		X		Distal Intergenic	1	113739404	113748875	9472	2	643441	uc001edg.2	47159	NA	LOC643441	uncharacterized LOC643441
chr1	113754250	113754399		X		Promoter (5-6kb)	1	113739404	113748875	9472	2	643441	uc001edg.2	-5375	NA	LOC643441	uncharacterized LOC643441
chr1	113760567	113760657		X	X	Distal Intergenic	1	113739404	113748875	9472	2	643441	uc001edg.2	-11692	NA	LOC643441	uncharacterized LOC643441
chr1	113766313	113766339	X	X		Distal Intergenic	1	113739404	113748875	9472	2	643441	uc001edg.2	-17438	NA	LOC643441	uncharacterized LOC643441
chr1	113766340	113766462	X	X	X	Distal Intergenic	1	113739404	113748875	9472	2	643441	uc001edg.2	-17465	NA	LOC643441	uncharacterized LOC643441
chr1	113777006	113777130		X	X	Distal Intergenic	1	113739404	113748875	9472	2	643441	uc001edg.2	-28131	NA	LOC643441	uncharacterized LOC643441
chr1	113794961	113795067		X	X	Distal Intergenic	1	113739404	113748875	9472	2	643441	uc001edg.2	-46086	NA	LOC643441	uncharacterized LOC643441
chr1	113818387	113818536		X		Distal Intergenic	1	113739404	113748875	9472	2	643441	uc001edg.2	-69512	NA	LOC643441	uncharacterized LOC643441
chr1	113819958	113820107		X		Distal Intergenic	1	113739404	113748875	9472	2	643441	uc001edg.2	-71083	NA	LOC643441	uncharacterized LOC643441
chr1	113932867	113933016		X		Promoter (<=1kb)	1	113933475	114224924	291450	1	260425	uc001edh.3	-459	ENSG00000081026	MAGI3	"membrane associated guanylate kinase, WW and PDZ domain containing 3"
chr1	113976785	113976929	X	X	X	"Intron (uc001edh.3/260425, intron 1 of 21)"	1	113933475	114228545	295071	1	260425	uc010owm.2	43310	ENSG00000081026	MAGI3	"membrane associated guanylate kinase, WW and PDZ domain containing 3"
chr1	113976930	113976934	X	X		"Intron (uc001edh.3/260425, intron 1 of 21)"	1	113933475	114228545	295071	1	260425	uc010owm.2	43455	ENSG00000081026	MAGI3	"membrane associated guanylate kinase, WW and PDZ domain containing 3"
chr1	113977304	113977450		X	X	"Intron (uc001edh.3/260425, intron 1 of 21)"	1	113933475	114228545	295071	1	260425	uc010owm.2	43829	ENSG00000081026	MAGI3	"membrane associated guanylate kinase, WW and PDZ domain containing 3"
chr1	114154883	114155005		X	X	"Intron (uc001edh.3/260425, intron 6 of 21)"	1	114133106	114228545	95440	1	260425	uc001edj.3	21777	ENSG00000081026	MAGI3	"membrane associated guanylate kinase, WW and PDZ domain containing 3"
chr1	114354962	114355111		X		Promoter (<=1kb)	1	114304454	114355070	50617	2	54665	uc001edq.3	0	ENSG00000081019	RSBN1	round spermatid basic protein 1
chr1	114447742	114447891		X		Promoter (<=1kb)	1	114437371	114447741	10371	2	10717	uc010owp.2	-1	ENSG00000134262	AP4B1	adaptor related protein complex 4 beta 1 subunit
chr1	114489470	114489619		X		Promoter (4-5kb)	1	114493767	114520491	26725	1	204851	uc001eeo.3	-4148	ENSG00000163349	HIPK1	homeodomain interacting protein kinase 1
chr1	114623251	114623391		X	X	Distal Intergenic	1	114631914	114641887	9974	2	148281	uc001eeu.3	18496	ENSG00000134207	SYT6	synaptotagmin 6
chr1	114695446	114695595		X		Promoter (<=1kb)	1	114631914	114695062	63149	2	148281	uc021orz.1	-384	ENSG00000134207	SYT6	synaptotagmin 6
chr1	114696483	114696631		X	X	Promoter (<=1kb)	1	114631914	114696472	64559	2	148281	uc001eev.3	-11	ENSG00000134207	SYT6	synaptotagmin 6
chr1	114830258	114830403	X	X	X	Distal Intergenic	1	114946948	114949722	2775	2	51592	uc001eey.1	119319	ENSG00000197323	TRIM33	tripartite motif containing 33
chr1	114830404	114830407	X	X		Distal Intergenic	1	114946948	114949722	2775	2	51592	uc001eey.1	119315	ENSG00000197323	TRIM33	tripartite motif containing 33
chr1	114881133	114881282			X	Distal Intergenic	1	114946948	114949722	2775	2	51592	uc001eey.1	68440	ENSG00000197323	TRIM33	tripartite motif containing 33
chr1	114922730	114922861		X	X	Distal Intergenic	1	114946948	114949722	2775	2	51592	uc001eey.1	26861	ENSG00000197323	TRIM33	tripartite motif containing 33
chr1	114931087	114931236	X	X		Distal Intergenic	1	114946948	114949722	2775	2	51592	uc001eey.1	18486	ENSG00000197323	TRIM33	tripartite motif containing 33
chr1	115053765	115053914			X	Promoter (<=1kb)	1	114935399	115053781	118383	2	51592	uc001eew.3	0	ENSG00000197323	TRIM33	tripartite motif containing 33
chr1	115185167	115185316		X		"Intron (uc001eez.3/163259, intron 1 of 29)"	1	115127196	115212732	85537	2	163259	uc001efc.1	27416	ENSG00000175984	DENND2C	DENN domain containing 2C
chr1	115212674	115212823		X		Promoter (<=1kb)	1	115127196	115212732	85537	2	163259	uc001efc.1	0	ENSG00000175984	DENND2C	DENN domain containing 2C
chr1	115475535	115475684		X		"Intron (uc001efq.3/6847, intron 23 of 31)"	1	115397455	115537990	140536	1	6847	uc010owt.2	78080	ENSG00000198765	SYCP1	synaptonemal complex protein 1
chr1	115579869	115580018	X	X		Distal Intergenic	1	115576567	115576930	364	1	7252	uc031pnq.1	3302	ENSG00000134200	TSHB	thyroid stimulating hormone beta
chr1	115678937	115678976	X	X		Distal Intergenic	1	115590633	115632121	41489	2	10100	uc021osc.1	-46816	ENSG00000134198	TSPAN2	tetraspanin 2
chr1	115678977	115679086	X	X	X	Distal Intergenic	1	115590633	115632121	41489	2	10100	uc021osc.1	-46856	ENSG00000134198	TSPAN2	tetraspanin 2
chr1	115691094	115691243		X		Distal Intergenic	1	115590633	115632121	41489	2	10100	uc021osc.1	-58973	ENSG00000134198	TSPAN2	tetraspanin 2
chr1	115721996	115722145		X		Distal Intergenic	1	115590633	115632121	41489	2	10100	uc021osc.1	-89875	ENSG00000134198	TSPAN2	tetraspanin 2
chr1	115731795	115731944		X		Distal Intergenic	1	115590633	115632121	41489	2	10100	uc021osc.1	-99674	ENSG00000134198	TSPAN2	tetraspanin 2
chr1	115760000	115760149		X		Distal Intergenic	1	115828537	115880857	52321	2	4803	uc001efu.1	120708	ENSG00000134259	NGF	nerve growth factor
chr1	115845296	115845445		X		"Intron (uc001efu.1/4803, intron 1 of 2)"	1	115828537	115880857	52321	2	4803	uc001efu.1	35412	ENSG00000134259	NGF	nerve growth factor
chr1	115899056	115899205	X	X		Distal Intergenic	1	115828537	115880857	52321	2	4803	uc001efu.1	-18199	ENSG00000134259	NGF	nerve growth factor
chr1	116078989	116079022	X	X		Distal Intergenic	1	116184574	116240845	56272	1	81839	uc001efv.1	-105552	ENSG00000173218	VANGL1	VANGL planar cell polarity protein 1
chr1	116079023	116079138	X	X	X	Distal Intergenic	1	116184574	116240845	56272	1	81839	uc001efv.1	-105436	ENSG00000173218	VANGL1	VANGL planar cell polarity protein 1
chr1	116136365	116136514	X	X		Distal Intergenic	1	116184574	116240845	56272	1	81839	uc001efv.1	-48060	ENSG00000173218	VANGL1	VANGL planar cell polarity protein 1
chr1	116220918	116221067	X	X		"Intron (uc001efv.1/81839, intron 4 of 7)"	1	116185250	116240845	55596	1	81839	uc021ose.1	35668	ENSG00000173218	VANGL1	VANGL planar cell polarity protein 1
chr1	116257593	116257742		X		"Intron (uc001efx.4/845, intron 8 of 10)"	1	116242626	116311426	68801	2	845	uc001efx.4	53684	ENSG00000118729	CASQ2	calsequestrin 2
chr1	116260264	116260413		X		"Intron (uc001efx.4/845, intron 8 of 10)"	1	116242626	116311426	68801	2	845	uc001efx.4	51013	ENSG00000118729	CASQ2	calsequestrin 2
chr1	116353946	116353957	X	X		Distal Intergenic	1	116378999	116383333	4335	2	4808	uc009wgz.3	29376	ENSG00000177551	NHLH2	nescient helix-loop-helix 2
chr1	116353958	116354095	X	X	X	Distal Intergenic	1	116378999	116383333	4335	2	4808	uc009wgz.3	29238	ENSG00000177551	NHLH2	nescient helix-loop-helix 2
chr1	116370848	116370997		X		Distal Intergenic	1	116378999	116383333	4335	2	4808	uc009wgz.3	12336	ENSG00000177551	NHLH2	nescient helix-loop-helix 2
chr1	116371411	116371531		X	X	Distal Intergenic	1	116378999	116383333	4335	2	4808	uc009wgz.3	11802	ENSG00000177551	NHLH2	nescient helix-loop-helix 2
chr1	116380517	116380666		X		Promoter (2-3kb)	1	116378999	116383333	4335	2	4808	uc009wgz.3	2667	ENSG00000177551	NHLH2	nescient helix-loop-helix 2
chr1	116519057	116519206			X	Promoter (<=1kb)	1	116519119	116574511	55393	1	55356	uc001ega.2	0	ENSG00000163393	SLC22A15	solute carrier family 22 member 15
chr1	116915762	116915911		X		Promoter (<=1kb)	1	116915795	116928766	12972	1	476	uc001egd.2	0	ENSG00000163399	ATP1A1	ATPase Na+/K+ transporting subunit alpha 1
chr1	116958487	116958636		X		Promoter (2-3kb)	1	116935487	116961244	25758	2	84852	uc009whb.2	2608	ENSG00000203865	ATP1A1-AS1	ATP1A1 antisense RNA 1
chr1	116975984	116976133		X		Distal Intergenic	1	116947336	116961244	13909	2	84852	uc001egk.3	-14740	ENSG00000203865	ATP1A1-AS1	ATP1A1 antisense RNA 1
chr1	117017818	117017967	X	X		Distal Intergenic	1	116947336	116961244	13909	2	84852	uc001egk.3	-56574	ENSG00000203865	ATP1A1-AS1	ATP1A1 antisense RNA 1
chr1	117174944	117175093	X	X		"Intron (uc031pnr.1/3321, intron 1 of 10)"	1	117127161	117150953	23793	2	3321	uc001egs.1	-23991	ENSG00000143061	IGSF3	immunoglobulin superfamily member 3
chr1	117191015	117191164		X		"Intron (uc031pnr.1/3321, intron 1 of 10)"	1	117117020	117209578	92559	2	3321	uc031pnr.1	18414	ENSG00000143061	IGSF3	immunoglobulin superfamily member 3
chr1	117210262	117210411		X		Promoter (<=1kb)	1	117117020	117210377	93358	2	3321	uc001egr.2	0	ENSG00000143061	IGSF3	immunoglobulin superfamily member 3
chr1	117230343	117230492		X		Distal Intergenic	1	117214371	117214449	79	1	100302117	uc021osk.1	15972	ENSG00000211543	MIR320B1	microRNA 320b-1
chr1	117602707	117602856		X		Promoter (<=1kb)	1	117602949	117624997	22049	1	8458	uc001egx.1	-93	ENSG00000116830	TTF2	transcription termination factor 2
chr1	117664370	117664519		X		Promoter (<=1kb)	1	117653677	117664411	10735	2	80263	uc001egz.2	0	ENSG00000134253	TRIM45	tripartite motif containing 45
chr1	117724389	117724538		X		"Intron (uc021osn.1/79679, intron 1 of 5)"	1	117686209	117746458	60250	2	79679	uc021osn.1	21920	ENSG00000134258	VTCN1	V-set domain containing T cell activation inhibitor 1
chr1	117753767	117753916		X		Promoter (<=1kb)	1	117686209	117753582	67374	2	79679	uc021oso.1	-185	ENSG00000134258	VTCN1	V-set domain containing T cell activation inhibitor 1
chr1	117811565	117811714		X		Distal Intergenic	1	117686209	117753582	67374	2	79679	uc021oso.1	-57983	ENSG00000134258	VTCN1	V-set domain containing T cell activation inhibitor 1
chr1	117842931	117843080	X	X		Distal Intergenic	1	117910085	118042176	132092	1	10905	uc009whg.1	-67005	ENSG00000198162	MAN1A2	mannosidase alpha class 1A member 2
chr1	117844630	117844779		X		Distal Intergenic	1	117910085	118042176	132092	1	10905	uc009whg.1	-65306	ENSG00000198162	MAN1A2	mannosidase alpha class 1A member 2
chr1	117909416	117909565		X		Promoter (<=1kb)	1	117910085	118042176	132092	1	10905	uc009whg.1	-520	ENSG00000198162	MAN1A2	mannosidase alpha class 1A member 2
chr1	117909945	117910094		X		Promoter (<=1kb)	1	117910085	118042176	132092	1	10905	uc009whg.1	0	ENSG00000198162	MAN1A2	mannosidase alpha class 1A member 2
chr1	117959395	117959544		X		"Intron (uc009whg.1/10905, intron 2 of 8)"	1	117910085	118068320	158236	1	10905	uc001ehd.1	49310	ENSG00000198162	MAN1A2	mannosidase alpha class 1A member 2
chr1	118220935	118220935	X	X		Distal Intergenic	1	118148604	118171011	22408	1	54855	uc001ehe.3	72331	ENSG00000183508	FAM46C	family with sequence similarity 46 member C
chr1	118220936	118221084	X	X	X	Distal Intergenic	1	118148604	118171011	22408	1	54855	uc001ehe.3	72332	ENSG00000183508	FAM46C	family with sequence similarity 46 member C
chr1	118275116	118275265		X		Distal Intergenic	1	118148604	118171011	22408	1	54855	uc001ehe.3	126512	ENSG00000183508	FAM46C	family with sequence similarity 46 member C
chr1	118283131	118283280	X			Distal Intergenic	1	118148604	118171011	22408	1	54855	uc001ehe.3	134527	ENSG00000183508	FAM46C	family with sequence similarity 46 member C
chr1	118324826	118324975		X		Distal Intergenic	1	118406107	118472302	66196	2	54834	uc001ehf.3	147327	ENSG00000196505	GDAP2	ganglioside induced differentiation associated protein 2
chr1	118358416	118358565	X	X		Distal Intergenic	1	118406107	118472302	66196	2	54834	uc001ehf.3	113737	ENSG00000196505	GDAP2	ganglioside induced differentiation associated protein 2
chr1	118889638	118889787		X		Distal Intergenic	1	118496288	118727848	231561	2	200162	uc001ehk.2	-161790	ENSG00000155761	SPAG17	sperm associated antigen 17
chr1	119076084	119076233		X		Distal Intergenic	1	118496288	118727848	231561	2	200162	uc001ehk.2	-348236	ENSG00000155761	SPAG17	sperm associated antigen 17
chr1	119106881	119107030		X		Distal Intergenic	1	119425666	119441748	16083	2	6913	uc009whj.1	334718	ENSG00000092607	TBX15	T-box 15
chr1	119132277	119132426		X		Distal Intergenic	1	119425666	119441748	16083	2	6913	uc009whj.1	309322	ENSG00000092607	TBX15	T-box 15
chr1	119170927	119171076		X		Distal Intergenic	1	119425666	119441748	16083	2	6913	uc009whj.1	270672	ENSG00000092607	TBX15	T-box 15
chr1	119202391	119202540		X		Distal Intergenic	1	119425666	119441748	16083	2	6913	uc009whj.1	239208	ENSG00000092607	TBX15	T-box 15
chr1	119309228	119309377		X		Distal Intergenic	1	119425666	119441748	16083	2	6913	uc009whj.1	132371	ENSG00000092607	TBX15	T-box 15
chr1	119530980	119531129		X		Promoter (1-2kb)	1	119425666	119532179	106514	2	6913	uc001ehl.1	1050	ENSG00000092607	TBX15	T-box 15
chr1	119683226	119683375		X		Promoter (<=1kb)	1	119573839	119683295	109457	2	10352	uc001ehm.3	0	ENSG00000116874	WARS2	"tryptophanyl tRNA synthetase 2, mitochondrial"
chr1	119869875	119870024		X		Distal Intergenic	1	119911402	119936751	25350	1	51179	uc001ehq.1	-41378	ENSG00000116882	HAO2	hydroxyacid oxidase 2
chr1	119947503	119947652		X		Promoter (9-10kb)	1	119957270	119965662	8393	1	3284	uc001ehs.3	-9618	ENSG00000203859	HSD3B2	"hydroxy-delta-5-steroid dehydrogenase, 3 beta- and steroid delta-isomerase 2"
chr1	119974566	119974715		X		"Intron (uc001ehu.3/3284, intron 3 of 3)"	1	119957743	119989122	31380	1	3284	uc001ehu.3	16823	ENSG00000203859	HSD3B2	"hydroxy-delta-5-steroid dehydrogenase, 3 beta- and steroid delta-isomerase 2"
chr1	120026581	120026730		X		Distal Intergenic	1	120049826	120057681	7856	1	3283	uc001ehv.1	-23096	ENSG00000203857	HSD3B1	"hydroxy-delta-5-steroid dehydrogenase, 3 beta- and steroid delta-isomerase 1"
chr1	120218054	120218203		X		Distal Intergenic	1	120162000	120190390	28391	2	90874	uc001ehy.1	-27664	ENSG00000143067	ZNF697	zinc finger protein 697
chr1	120309210	120309359	X			Promoter (1-2kb)	1	120299896	120307249	7354	2	3158	uc021osx.1	-1961	ENSG00000134240	HMGCS2	3-hydroxy-3-methylglutaryl-CoA synthase 2
chr1	120317800	120317916	X	X	X	Promoter (6-7kb)	1	120290619	120311555	20937	2	3158	uc010oxj.2	-6245	ENSG00000134240	HMGCS2	3-hydroxy-3-methylglutaryl-CoA synthase 2
chr1	120317917	120317949	X	X		Promoter (6-7kb)	1	120290619	120311555	20937	2	3158	uc010oxj.2	-6362	ENSG00000134240	HMGCS2	3-hydroxy-3-methylglutaryl-CoA synthase 2
chr1	120357069	120357218		X		Promoter (2-3kb)	1	120344946	120354203	9258	2	83998	uc001eih.1	-2866	ENSG00000134193	REG4	regenerating family member 4
chr1	120637762	120637911		X		Distal Intergenic	1	120492743	120612317	119575	2	4853	uc001eim.4	-25445	ENSG00000134250	NOTCH2	notch 2
chr1	120695777	120695922		X	X	Distal Intergenic	1	120492743	120612317	119575	2	4853	uc001eim.4	-83460	ENSG00000134250	NOTCH2	notch 2
chr1	120838609	120838758		X		Promoter (<=1kb)	1	120839005	120855681	16677	1	653820	uc009whp.3	-247	ENSG00000188610	FAM72B	family with sequence similarity 72 member B
chr1	120925497	120925646		X		Downstream (<1kb)	1	120926128	120935944	9817	2	2210	uc001eip.3	10298	ENSG00000198019	FCGR1B	Fc fragment of IgG receptor Ib
chr1	120925929	120926078		X		Downstream (<1kb)	1	120926128	120935944	9817	2	2210	uc001eip.3	9866	ENSG00000198019	FCGR1B	Fc fragment of IgG receptor Ib
chr1	121118492	121118641		X		"Intron (uc031pnu.1/100996712, intron 3 of 5)"	1	121107152	121129827	22676	1	100996712	uc031pnu.1	11340	NA	SRGAP2D	SLIT-ROBO Rho GTPase activating protein 2D (pseudogene)
chr1	121261341	121261490		X		Promoter (<=1kb)	1	121260910	121313686	52777	1	647121	uc001eiu.1	431	ENSG00000231752	EMBP1	embigin pseudogene 1
chr1	143913370	143913519		X		Promoter (<=1kb)	1	143896452	143913143	16692	2	728833	uc010evy.1	-227	ENSG00000215784	FAM72D	family with sequence similarity 72 member D
chr1	143967252	143967391		X	X	"Intron (uc010oxm.1/uc010oxm.1, intron 1 of 3)"	1	143896452	143913143	16692	2	728833	uc010evy.1	-54109	ENSG00000215784	FAM72D	family with sequence similarity 72 member D
chr1	144061678	144061827		X		"Intron (uc010oxm.1/uc010oxm.1, intron 3 of 3)"	1	144146811	146467744	2320934	1	100288142	uc021ott.2	-84984	ENSG00000162825	NBPF20	NBPF member 20
chr1	144302830	144302979		X		"Intron (uc010oxn.2/728841, intron 15 of 18)"	1	144300512	144340773	40262	2	728855	uc001ekr.4	37794	NA	LINC00623	long intergenic non-protein coding RNA 623
chr1	144311620	144311769		X		"Intron (uc010oxn.2/728841, intron 15 of 18)"	1	144300512	144340773	40262	2	728855	uc001ekr.4	29004	NA	LINC00623	long intergenic non-protein coding RNA 623
chr1	144491848	144491997		X		"Intron (uc010oxn.2/728841, intron 15 of 18)"	1	144480745	144521009	40265	2	728875	uc001ela.4	29012	NA	NA	NA
chr1	144518213	144518360	X	X	X	Promoter (2-3kb)	1	144480745	144521009	40265	2	728875	uc001ela.4	2649	NA	NA	NA
chr1	144518361	144518362	X	X		Promoter (2-3kb)	1	144480745	144521009	40265	2	728875	uc001ela.4	2647	NA	NA	NA
chr1	144533628	144533777		X		"Intron (uc010oxn.2/728841, intron 15 of 18)"	1	144480746	144521969	41224	2	728875	uc001ekz.4	-11659	NA	NA	NA
chr1	144534228	144534377		X		"Intron (uc010oxn.2/728841, intron 15 of 18)"	1	144480746	144521969	41224	2	728875	uc001ekz.4	-12259	NA	NA	NA
chr1	144539674	144539823			X	"Intron (uc010oxn.2/728841, intron 15 of 18)"	1	144480746	144521969	41224	2	728875	uc001ekz.4	-17705	NA	NA	NA
chr1	144604114	144604122	X	X		"Exon (uc001ele.3/uc001ele.3, exon 3 of 3)"	1	144610815	144612727	1913	2	767846	uc001elf.4	8605	ENSG00000270392	PFN1P2	profilin 1 pseudogene 2
chr1	144604123	144604263	X	X	X	"Exon (uc001ele.3/uc001ele.3, exon 3 of 3)"	1	144610815	144612727	1913	2	767846	uc001elf.4	8464	ENSG00000270392	PFN1P2	profilin 1 pseudogene 2
chr1	144706974	144707123		X		"Intron (uc010oxn.2/728841, intron 15 of 18)"	1	144676437	144680025	3589	2	653513	uc021oue.1	-26949	ENSG00000178104	LOC653513	phosphodiesterase 4D interacting protein-like
chr1	144881507	144881656	X			"Exon (uc001elv.4/9659, exon 5 of 24)"	1	144851424	144894125	42702	2	9659	uc001elv.4	12469	ENSG00000178104	PDE4DIP	phosphodiesterase 4D interacting protein
chr1	144886699	144886848	X	X		"Intron (uc021ott.2/100288142, intron 53 of 131)"	1	144851424	144894125	42702	2	9659	uc001elv.4	7277	ENSG00000178104	PDE4DIP	phosphodiesterase 4D interacting protein
chr1	144893963	144894112	X	X		Promoter (<=1kb)	1	144851424	144894125	42702	2	9659	uc001elv.4	13	ENSG00000178104	PDE4DIP	phosphodiesterase 4D interacting protein
chr1	144931964	144932113		X		Promoter (<=1kb)	1	144890591	144932032	41442	2	9659	uc001emb.1	0	ENSG00000178104	PDE4DIP	phosphodiesterase 4D interacting protein
chr1	144961014	144961162		X	X	"Intron (uc021ott.2/100288142, intron 53 of 131)"	1	144890591	144932032	41442	2	9659	uc001emb.1	-28982	ENSG00000178104	PDE4DIP	phosphodiesterase 4D interacting protein
chr1	144992975	144993124	X	X		Promoter (1-2kb)	1	144676437	144995033	318597	2	653513	uc001elk.2	1909	ENSG00000178104	LOC653513	phosphodiesterase 4D interacting protein-like
chr1	145119689	145119697	X	X		"Intron (uc021ott.2/100288142, intron 53 of 131)"	1	145096407	145116997	20591	1	9554	uc031poa.1	23282	ENSG00000265808	SEC22B	"SEC22 homolog B, vesicle trafficking protein (gene/pseudogene)"
chr1	145119698	145119838	X	X	X	"Intron (uc021ott.2/100288142, intron 53 of 131)"	1	145096407	145116997	20591	1	9554	uc031poa.1	23291	ENSG00000265808	SEC22B	"SEC22 homolog B, vesicle trafficking protein (gene/pseudogene)"
chr1	145139845	145139994			X	"Intron (uc021ott.2/100288142, intron 53 of 131)"	1	145096407	145116997	20591	1	9554	uc031poa.1	43438	ENSG00000265808	SEC22B	"SEC22 homolog B, vesicle trafficking protein (gene/pseudogene)"
chr1	145140573	145140722			X	"Intron (uc021ott.2/100288142, intron 53 of 131)"	1	145096407	145116997	20591	1	9554	uc031poa.1	44166	ENSG00000265808	SEC22B	"SEC22 homolog B, vesicle trafficking protein (gene/pseudogene)"
chr1	145190579	145190728			X	"Intron (uc021ott.2/100288142, intron 53 of 131)"	1	145209111	145304652	95542	1	100132406	uc021ouk.1	-18383	ENSG00000271425	NBPF10	NBPF member 10
chr1	145196970	145197098		X	X	"Intron (uc021ott.2/100288142, intron 53 of 131)"	1	145209111	145304652	95542	1	100132406	uc021ouk.1	-12013	ENSG00000271425	NBPF10	NBPF member 10
chr1	145281493	145281642			X	5' UTR	1	145293233	145311154	17922	1	100132406	uc001emq.1	-11591	ENSG00000271425	NBPF10	NBPF member 10
chr1	145470366	145470515		X		Promoter (<=1kb)	1	145470508	145475647	5140	1	284615	uc001enq.1	0	ENSG00000272031	ANKRD34A	ankyrin repeat domain 34A
chr1	145476954	145477103		X		Promoter (<=1kb)	1	145477085	145499091	22007	1	128077	uc001enr.3	0	ENSG00000271601	LIX1L	limb and CNS expressed 1 like
chr1	145502228	145502362		X	X	Promoter (5-6kb)	1	145507557	145513535	5979	1	9939	uc001ent.2	-5195	ENSG00000265241	RBM8A	RNA binding motif protein 8A
chr1	145516048	145516197		X		Promoter (<=1kb)	1	145516165	145523732	7568	1	8799	uc001eny.2	0	ENSG00000131779	PEX11B	peroxisomal biogenesis factor 11 beta
chr1	145562743	145562892			X	"Exon (uc010oyx.1/148741, exon 9 of 9)"	1	145575290	145580662	5373	1	10401	uc010oyy.1	-12398	ENSG00000131788	PIAS3	protein inhibitor of activated STAT 3
chr1	145575121	145575270		X		Promoter (<=1kb)	1	145575290	145580662	5373	1	10401	uc010oyy.1	-20	ENSG00000131788	PIAS3	protein inhibitor of activated STAT 3
chr1	145575903	145576052		X		Promoter (<=1kb)	1	145575988	145586546	10559	1	10401	uc001eoc.1	0	ENSG00000131788	PIAS3	protein inhibitor of activated STAT 3
chr1	145669161	145669303	X	X	X	"Intron (uc021ott.2/100288142, intron 99 of 131)"	1	145698953	145706827	7875	2	11126	uc010oyz.1	37524	ENSG00000117281	CD160	CD160 molecule
chr1	145669304	145669310	X	X		"Intron (uc021ott.2/100288142, intron 99 of 131)"	1	145698953	145706827	7875	2	11126	uc010oyz.1	37517	ENSG00000117281	CD160	CD160 molecule
chr1	146342958	146342960	X	X		"Intron (uc021ott.2/100288142, intron 99 of 131)"	1	146334190	146460493	126304	1	149013	uc010ozk.2	8768	ENSG00000268043	NBPF12	NBPF member 12
chr1	146342961	146343107	X	X	X	"Intron (uc021ott.2/100288142, intron 99 of 131)"	1	146334190	146460493	126304	1	149013	uc010ozk.2	8771	ENSG00000268043	NBPF12	NBPF member 12
chr1	146383808	146383957		X		"Intron (uc021ott.2/100288142, intron 99 of 131)"	1	146373857	146467744	93888	1	149013	uc031poi.1	9951	ENSG00000268043	NBPF12	NBPF member 12
chr1	146578174	146578322		X	X	"Intron (uc031poj.1/644861, intron 4 of 5)"	1	146571066	146585928	14863	2	644861	uc031poj.1	7606	NA	NBPF13P	"NBPF member 13, pseudogene"
chr1	146643911	146644060		X		Promoter (<=1kb)	1	146626685	146644129	17445	2	5565	uc001epe.3	69	ENSG00000131791	PRKAB2	protein kinase AMP-activated non-catalytic subunit beta 2
chr1	146714182	146714331		X		Promoter (<=1kb)	1	146714291	146767447	53157	1	9557	uc001epm.5	0	ENSG00000131778	CHD1L	chromodomain helicase DNA binding protein 1 like
chr1	146860498	146860647	X	X		"Intron (uc021ovk.1/100289211, intron 3 of 3)"	1	146736039	146767447	31409	1	9557	uc009wji.4	124459	ENSG00000131778	CHD1L	chromodomain helicase DNA binding protein 1 like
chr1	146998404	146998537		X	X	Promoter (8-9kb)	1	146853914	146989699	135786	2	100289211	uc021ovk.1	-8705	ENSG00000278811	LINC00624	long intergenic non-protein coding RNA 624
chr1	147013113	147013262		X		Promoter (<=1kb)	1	147013182	147098015	84834	1	607	uc001epq.3	0	ENSG00000116128	BCL9	B cell CLL/lymphoma 9
chr1	147071636	147071785		X		"Intron (uc001epq.3/607, intron 1 of 9)"	1	147083377	147096757	13381	1	607	uc010ozr.1	-11592	ENSG00000116128	BCL9	B cell CLL/lymphoma 9
chr1	147118301	147118449	X	X	X	Downstream (<1kb)	1	147119168	147142634	23467	2	51205	uc001epr.2	24185	ENSG00000162836	ACP6	"acid phosphatase 6, lysophosphatidic"
chr1	147118450	147118450	X	X		Downstream (<1kb)	1	147119168	147142634	23467	2	51205	uc001epr.2	24184	ENSG00000162836	ACP6	"acid phosphatase 6, lysophosphatidic"
chr1	147221047	147221196		X		Distal Intergenic	1	147228332	147232714	4383	2	2702	uc001eps.1	11518	ENSG00000265107	GJA5	gap junction protein alpha 5
chr1	147253154	147253303	X	X		Promoter (7-8kb)	1	147228332	147245484	17153	2	2702	uc001ept.1	-7670	ENSG00000265107	GJA5	gap junction protein alpha 5
chr1	147283614	147283763	X	X		Distal Intergenic	1	147228332	147245484	17153	2	2702	uc001ept.1	-38130	ENSG00000265107	GJA5	gap junction protein alpha 5
chr1	147293177	147293230	X	X	X	Distal Intergenic	1	147228332	147245484	17153	2	2702	uc001ept.1	-47693	ENSG00000265107	GJA5	gap junction protein alpha 5
chr1	147293231	147293326	X	X		Distal Intergenic	1	147228332	147245484	17153	2	2702	uc001ept.1	-47747	ENSG00000265107	GJA5	gap junction protein alpha 5
chr1	147320099	147320185		X	X	Distal Intergenic	1	147374946	147381395	6450	1	2703	uc001epu.2	-54761	ENSG00000121634	GJA8	gap junction protein alpha 8
chr1	147334172	147334321	X			Distal Intergenic	1	147374946	147381395	6450	1	2703	uc001epu.2	-40625	ENSG00000121634	GJA8	gap junction protein alpha 8
chr1	147394256	147394328	X	X	X	Promoter (6-7kb)	1	147400506	147465025	64520	1	51463	uc010ozs.1	-6178	ENSG00000188092	GPR89B	G protein-coupled receptor 89B
chr1	147394329	147394405	X	X		Promoter (6-7kb)	1	147400506	147465025	64520	1	51463	uc010ozs.1	-6101	ENSG00000188092	GPR89B	G protein-coupled receptor 89B
chr1	147735703	147735852		X		"Intron (uc001eqe.3/728841, intron 12 of 13)"	1	147806603	147806678	76	2	100847044	uc031pom.1	70826	ENSG00000283676	MIR5087	microRNA 5087
chr1	147770221	147770367	X	X	X	"Intron (uc001eqe.3/728841, intron 12 of 13)"	1	147806603	147806678	76	2	100847044	uc031pom.1	36311	ENSG00000283676	MIR5087	microRNA 5087
chr1	147770368	147770370	X	X		"Intron (uc001eqe.3/728841, intron 12 of 13)"	1	147806603	147806678	76	2	100847044	uc031pom.1	36308	ENSG00000283676	MIR5087	microRNA 5087
chr1	147806792	147806941		X		Promoter (<=1kb)	1	147806603	147806678	76	2	100847044	uc031pom.1	-114	ENSG00000283676	MIR5087	microRNA 5087
chr1	147994196	147994345		X		"Intron (uc001eqe.3/728841, intron 12 of 13)"	1	148005403	148011788	6386	2	728841	uc010pad.1	17443	ENSG00000270231	NBPF8	NBPF member 8
chr1	148000647	148000796		X		"Intron (uc001eqe.3/728841, intron 12 of 13)"	1	148005403	148011788	6386	2	728841	uc010pad.1	10992	ENSG00000270231	NBPF8	NBPF member 8
chr1	148241510	148241659		X		"Intron (uc001eqe.3/728841, intron 1 of 13)"	1	148011680	148258489	246810	2	25832	uc021owf.2	16830	ENSG00000270629	NBPF14	NBPF member 14
chr1	148604827	148604976		X		Distal Intergenic	1	148644011	148644795	785	1	730262	uc010paz.2	-39035	ENSG00000271567	PPIAL4E	peptidylprolyl isomerase A like 4E
chr1	148855158	148855307			X	Distal Intergenic	1	148806015	148806799	785	1	728945	uc010pbb.2	49143	ENSG00000279782	PPIAL4F	peptidylprolyl isomerase A like 4F
chr1	148864539	148864688			X	Distal Intergenic	1	148806015	148806799	785	1	728945	uc010pbb.2	58524	ENSG00000279782	PPIAL4F	peptidylprolyl isomerase A like 4F
chr1	149223840	149223989		X		Distal Intergenic	1	149279476	149291742	12267	1	388692	uc010pbf.2	-55487	NA	LOC388692	uncharacterized LOC388692
chr1	149231351	149231500		X		"Intron (uc010pbe.1/uc010pbe.1, intron 1 of 1)"	1	149279476	149291742	12267	1	388692	uc010pbf.2	-47976	NA	LOC388692	uncharacterized LOC388692
chr1	149514066	149514215		X		Distal Intergenic	1	149553003	149553787	785	1	653505	uc001esj.3	-38788	ENSG00000263353	PPIAL4A	peptidylprolyl isomerase A like 4A
chr1	149605447	149605596			X	"Intron (uc001esk.5/728855, intron 1 of 1)"	1	149576262	149616786	40525	1	728855	uc001esl.5	29185	NA	LINC00623	long intergenic non-protein coding RNA 623
chr1	149783915	149784064		X		Promoter (<=1kb)	1	149754245	149783928	29684	2	440689	uc010pbj.2	0	ENSG00000203814	HIST2H2BF	histone cluster 2 H2B family member f
chr1	149785167	149785316		X		Promoter (<=1kb)	1	149784780	149785236	457	2	653604	uc010pbl.2	0	ENSG00000183598	HIST2H3D	histone cluster 2 H3 family member d
chr1	149858310	149858459		X		Promoter (<=1kb)	1	149858525	149858961	437	1	8338	uc001etd.3	-66	ENSG00000184260	HIST2H2AC	histone cluster 2 H2A family member c
chr1	149859546	149859695		X		Promoter (<=1kb)	1	149859019	149859466	448	2	317772	uc001ete.3	-80	ENSG00000184270	HIST2H2AB	histone cluster 2 H2A family member b
chr1	150121961	150122109		X	X	Promoter (<=1kb)	1	150122170	150131825	9656	1	51177	uc001ett.3	-61	ENSG00000023902	PLEKHO1	pleckstrin homology domain containing O1
chr1	150208450	150208599		X		Promoter (<=1kb)	1	150190717	150208504	17788	2	81611	uc001etw.3	0	ENSG00000143401	ANP32E	acidic nuclear phosphoprotein 32 family member E
chr1	150336442	150336591		X		Promoter (<=1kb)	1	150336990	150446032	109043	1	23248	uc010pcc.1	-399	ENSG00000163125	RPRD2	regulation of nuclear pre-mRNA domain containing 2
chr1	150488048	150488197		X		Promoter (<=1kb)	1	150488233	150490508	2276	1	100874054	uc031pos.1	-36	ENSG00000228126	FALEC	focally amplified long non-coding RNA in epithelial cancer
chr1	150552048	150552197		X		Promoter (<=1kb)	1	150547027	150552086	5060	2	4170	uc010pch.2	0	ENSG00000143384	MCL1	"MCL1, BCL2 family apoptosis regulator"
chr1	150601622	150601771		X		Promoter (<=1kb)	1	150595754	150601609	5856	2	2029	uc001evf.3	-13	ENSG00000143420	ENSA	endosulfine alpha
chr1	150614018	150614167			X	Distal Intergenic	1	150599522	150602098	2577	2	2029	uc001evi.3	-11920	ENSG00000143420	ENSA	endosulfine alpha
chr1	150783556	150783705		X		Promoter (2-3kb)	1	150778337	150780917	2581	2	1513	uc009wma.2	-2639	ENSG00000143387	CTSK	cathepsin K
chr1	150849132	150849281		X		Promoter (<=1kb)	1	150782181	150849244	67064	2	405	uc001evr.2	0	ENSG00000143437	ARNT	aryl hydrocarbon receptor nuclear translocator
chr1	150898684	150898833		X		Promoter (<=1kb)	1	150898815	150917797	18983	1	9869	uc001evw.4	0	ENSG00000143379	SETDB1	SET domain bifurcated 1
chr1	151032743	151032892		X		Promoter (<=1kb)	1	151032151	151040973	8823	1	10962	uc001ewq.3	592	ENSG00000213190	MLLT11	"MLLT11, transcription factor 7 cofactor"
chr1	151119154	151119303		X		Promoter (<=1kb)	1	151109333	151119140	9808	2	10500	uc009wml.2	-14	ENSG00000143434	SEMA6C	semaphorin 6C
chr1	151253830	151253979		X		Promoter (<=1kb)	1	151254094	151260882	6789	1	57592	uc001exp.1	-115	ENSG00000143373	ZNF687	zinc finger protein 687
chr1	151254519	151254668		X		Promoter (<=1kb)	1	151254791	151264381	9591	1	57592	uc001exq.3	-123	ENSG00000143373	ZNF687	zinc finger protein 687
chr1	151430954	151431075		X	X	Promoter (<=1kb)	1	151375200	151431941	56742	2	23126	uc001eyd.2	866	ENSG00000143442	POGZ	pogo transposable element derived with ZNF domain
chr1	151464817	151464966			X	Distal Intergenic	1	151483862	151511167	27306	1	57530	uc009wmw.3	-18896	ENSG00000143375	CGN	cingulin
chr1	151475558	151475707		X		Promoter (8-9kb)	1	151483862	151511167	27306	1	57530	uc009wmw.3	-8155	ENSG00000143375	CGN	cingulin
chr1	151483753	151483902		X		Promoter (<=1kb)	1	151483862	151511167	27306	1	57530	uc009wmw.3	0	ENSG00000143375	CGN	cingulin
chr1	151512618	151512767		X		Promoter (<=1kb)	1	151512781	151556059	43279	1	7286	uc001eyl.3	-14	ENSG00000143367	TUFT1	tuftelin 1
chr1	151763023	151763172		X		Promoter (<=1kb)	1	151746575	151763010	16436	2	11022	uc010pdn.1	-13	ENSG00000182134	TDRKH	tudor and KH domain containing
chr1	151803311	151803460		X		Promoter (<=1kb)	1	151778547	151804348	25802	2	6097	uc001ezh.3	888	ENSG00000143365	RORC	RAR related orphan receptor C
chr1	151845359	151845508		X		3' UTR	1	151819577	151826173	6597	2	284486	uc021oyw.1	-19186	ENSG00000196407	THEM5	thioesterase superfamily member 5
chr1	151878318	151878467			X	"Intron (uc001ezj.2/117145, intron 1 of 5)"	1	151843343	151882361	39019	2	117145	uc001ezj.2	3894	ENSG00000159445	THEM4	thioesterase superfamily member 4
chr1	151881980	151882129		X		Promoter (<=1kb)	1	151843343	151882361	39019	2	117145	uc001ezj.2	232	ENSG00000159445	THEM4	thioesterase superfamily member 4
chr1	151894064	151894213	X	X		Distal Intergenic	1	151843343	151882361	39019	2	117145	uc001ezk.2	-11703	ENSG00000159445	THEM4	thioesterase superfamily member 4
chr1	151909315	151909424		X	X	Distal Intergenic	1	151843343	151882361	39019	2	117145	uc001ezk.2	-26954	ENSG00000159445	THEM4	thioesterase superfamily member 4
chr1	151934638	151934787	X	X		Distal Intergenic	1	151955386	151966714	11329	2	6281	uc001ezl.3	31927	ENSG00000197747	S100A10	S100 calcium binding protein A10
chr1	151949458	151949607		X		Distal Intergenic	1	151955386	151966714	11329	2	6281	uc001ezl.3	17107	ENSG00000197747	S100A10	S100 calcium binding protein A10
chr1	151960952	151961101	X	X		"Intron (uc001ezl.3/6281, intron 1 of 2)"	1	151955386	151966714	11329	2	6281	uc001ezl.3	5613	ENSG00000197747	S100A10	S100 calcium binding protein A10
chr1	151966650	151966799		X		Promoter (<=1kb)	1	151955386	151966714	11329	2	6281	uc001ezl.3	0	ENSG00000197747	S100A10	S100 calcium binding protein A10
chr1	152007687	152007836		X		Promoter (1-2kb)	1	152004982	152009511	4530	2	6282	uc001ezn.3	1675	ENSG00000163191	S100A11	S100 calcium binding protein A11
chr1	152020702	152020851		X		Distal Intergenic	1	152004982	152009511	4530	2	6282	uc001ezn.3	-11191	ENSG00000163191	S100A11	S100 calcium binding protein A11
chr1	152059446	152059586		X	X	Promoter (1-2kb)	1	152056620	152061540	4921	2	126637	uc001ezo.1	1954	ENSG00000182898	TCHHL1	trichohyalin like 1
chr1	152129057	152129206	X	X		Promoter (2-3kb)	1	152126071	152131704	5634	2	126638	uc001ezs.1	2498	ENSG00000215853	RPTN	repetin
chr1	152651694	152651843	X	X		Distal Intergenic	1	152647791	152649049	1259	1	353140	uc001fah.4	3903	ENSG00000187180	LCE2C	late cornified envelope 2C
chr1	152652048	152652197	X	X		Distal Intergenic	1	152647791	152649049	1259	1	353140	uc001fah.4	4257	ENSG00000187180	LCE2C	late cornified envelope 2C
chr1	152718617	152718765	X	X	X	Distal Intergenic	1	152730506	152734529	4024	1	448834	uc001fal.1	-11741	ENSG00000203786	KPRP	keratinocyte proline rich protein
chr1	152718766	152718766	X	X		Distal Intergenic	1	152730506	152734529	4024	1	448834	uc001fal.1	-11740	ENSG00000203786	KPRP	keratinocyte proline rich protein
chr1	152913964	152914113		X		Distal Intergenic	1	152943128	152945069	1942	1	163778	uc001fav.1	-29015	ENSG00000184148	SPRR4	small proline rich protein 4
chr1	152935624	152935725	X	X	X	Promoter (7-8kb)	1	152943128	152945069	1942	1	163778	uc001fav.1	-7403	ENSG00000184148	SPRR4	small proline rich protein 4
chr1	152935726	152935773	X	X		Promoter (7-8kb)	1	152943128	152945069	1942	1	163778	uc001fav.1	-7355	ENSG00000184148	SPRR4	small proline rich protein 4
chr1	153262745	153262894		X		Distal Intergenic	1	153270338	153283194	12857	2	114771	uc001fbn.1	20300	ENSG00000159527	PGLYRP3	peptidoglycan recognition protein 3
chr1	153439731	153439880	X	X		Promoter (6-7kb)	1	153430220	153433137	2918	2	6278	uc001fbv.1	-6594	ENSG00000143556	S100A7	S100 calcium binding protein A7
chr1	153450893	153451038	X	X	X	Distal Intergenic	1	153430220	153433137	2918	2	6278	uc001fbv.1	-17756	ENSG00000143556	S100A7	S100 calcium binding protein A7
chr1	153451039	153451042	X	X		Distal Intergenic	1	153430220	153433137	2918	2	6278	uc001fbv.1	-17902	ENSG00000143556	S100A7	S100 calcium binding protein A7
chr1	153551383	153551532	X	X		Distal Intergenic	1	153533585	153538306	4722	2	6273	uc001fcb.3	-13077	ENSG00000196754	S100A2	S100 calcium binding protein A2
chr1	153585481	153585630	X			Promoter (<=1kb)	1	153579367	153585514	6148	2	140576	uc001fcd.1	0	ENSG00000188643	S100A16	S100 calcium binding protein A16
chr1	153599984	153600133		X		Promoter (<=1kb)	1	153591276	153600117	8842	2	6284	uc001fch.3	0	ENSG00000189171	S100A13	S100 calcium binding protein A13
chr1	153643520	153643669		X		Promoter (<=1kb)	1	153637669	153643504	5836	2	3608	uc009wol.2	-16	ENSG00000143621	ILF2	interleukin enhancer binding factor 2
chr1	153747663	153747812		X		Promoter (<=1kb)	1	153747768	153752633	4866	1	11000	uc001fcz.3	0	ENSG00000143554	SLC27A3	solute carrier family 27 member 3
chr1	153748587	153748736		X		Promoter (<=1kb)	1	153747768	153752633	4866	1	11000	uc009won.3	819	ENSG00000143554	SLC27A3	solute carrier family 27 member 3
chr1	153895453	153895602		X		Promoter (<=1kb)	1	153777203	153895451	118249	2	57459	uc001fdb.4	-2	ENSG00000143614	GATAD2B	GATA zinc finger domain containing 2B
chr1	153936059	153936208		X		Promoter (<=1kb)	1	153931575	153936117	4543	2	27173	uc001fdk.4	0	ENSG00000143570	SLC39A1	solute carrier family 39 member 1
chr1	153939811	153939960		X		Promoter (<=1kb)	1	153931575	153940208	8634	2	27173	uc001fdl.4	248	ENSG00000143570	SLC39A1	solute carrier family 39 member 1
chr1	153940164	153940313		X		Promoter (<=1kb)	1	153931575	153940208	8634	2	27173	uc001fdl.4	0	ENSG00000143570	SLC39A1	solute carrier family 39 member 1
chr1	154306777	154306926		X		"Intron (uc001few.3/57198, intron 10 of 11)"	1	154301275	154310020	8746	1	57198	uc001fey.1	5502	ENSG00000143515	ATP8B2	ATPase phospholipid transporting 8B2
chr1	154326994	154327143	X	X		Distal Intergenic	1	154301275	154310020	8746	1	57198	uc001fey.1	25719	ENSG00000143515	ATP8B2	ATPase phospholipid transporting 8B2
chr1	154377737	154377886		X		Promoter (<=1kb)	1	154377669	154441926	64258	1	3570	uc001ffa.2	68	ENSG00000160712	IL6R	interleukin 6 receptor
chr1	154405239	154405388		X		"Intron (uc021paf.1/3570, intron 3 of 6)"	1	154377669	154441926	64258	1	3570	uc001ffa.2	27570	ENSG00000160712	IL6R	interleukin 6 receptor
chr1	154453593	154453717		X	X	3' UTR	1	154451954	154474526	22573	2	126669	uc001ffb.3	20809	ENSG00000169291	SHE	Src homology 2 domain containing E
chr1	154461866	154462013		X	X	"Intron (uc001ffb.3/126669, intron 2 of 5)"	1	154451954	154474526	22573	2	126669	uc001ffb.3	12513	ENSG00000169291	SHE	Src homology 2 domain containing E
chr1	154474252	154474401			X	Promoter (<=1kb)	1	154451954	154474526	22573	2	126669	uc001ffb.3	125	ENSG00000169291	SHE	Src homology 2 domain containing E
chr1	154474864	154475013			X	Promoter (<=1kb)	1	154474695	154520623	45929	1	126668	uc009wow.3	169	ENSG00000163239	TDRD10	tudor domain containing 10
chr1	154656401	154656405	X	X		Distal Intergenic	1	154554534	154600456	45923	2	103	uc001ffk.3	-55945	ENSG00000160710	ADAR	"adenosine deaminase, RNA specific"
chr1	154656406	154656550	X	X	X	Distal Intergenic	1	154554534	154600456	45923	2	103	uc001ffk.3	-55950	ENSG00000160710	ADAR	"adenosine deaminase, RNA specific"
chr1	154715330	154715479			X	"Intron (uc001ffo.3/3782, intron 3 of 7)"	1	154554534	154600456	45923	2	103	uc001ffk.3	-114874	ENSG00000160710	ADAR	"adenosine deaminase, RNA specific"
chr1	154717842	154717990		X	X	"Intron (uc001ffo.3/3782, intron 3 of 7)"	1	154669942	154832338	162397	2	3782	uc001ffo.3	114348	ENSG00000143603	KCNN3	potassium calcium-activated channel subfamily N member 3
chr1	154720569	154720718			X	"Intron (uc001ffo.3/3782, intron 3 of 7)"	1	154669942	154832338	162397	2	3782	uc001ffo.3	111620	ENSG00000143603	KCNN3	potassium calcium-activated channel subfamily N member 3
chr1	154757536	154757685			X	"Intron (uc001ffo.3/3782, intron 2 of 7)"	1	154669942	154832338	162397	2	3782	uc001ffo.3	74653	ENSG00000143603	KCNN3	potassium calcium-activated channel subfamily N member 3
chr1	154786113	154786262		X		"Intron (uc001ffo.3/3782, intron 2 of 7)"	1	154669942	154832338	162397	2	3782	uc001ffo.3	46076	ENSG00000143603	KCNN3	potassium calcium-activated channel subfamily N member 3
chr1	154805453	154805465		X	X	"Intron (uc001ffo.3/3782, intron 1 of 7)"	1	154669942	154832338	162397	2	3782	uc001ffo.3	26873	ENSG00000143603	KCNN3	potassium calcium-activated channel subfamily N member 3
chr1	154946931	154947080		X		Promoter (<=1kb)	1	154934774	154946959	12186	2	6464	uc001ffx.3	0	ENSG00000160691	SHC1	SHC adaptor protein 1
chr1	154973601	154973750		X		Promoter (1-2kb)	1	154975106	154991001	15896	1	51043	uc001fgj.4	-1356	ENSG00000160685	ZBTB7B	zinc finger and BTB domain containing 7B
chr1	154974583	154974732		X		Promoter (<=1kb)	1	154975106	154991001	15896	1	51043	uc001fgj.4	-374	ENSG00000160685	ZBTB7B	zinc finger and BTB domain containing 7B
chr1	154990019	154990168		X		3' UTR	1	154986924	154991001	4078	1	51043	uc001fgl.4	3095	ENSG00000160685	ZBTB7B	zinc finger and BTB domain containing 7B
chr1	155023594	155023743		X		Promoter (<=1kb)	1	155017668	155023641	5974	2	100505666	uc021pam.1	0	NA	DCST1-AS1	DCST1 antisense RNA 1
chr1	155036118	155036267		X		Promoter (<=1kb)	1	155036213	155060014	23802	1	1944	uc010pew.2	0	ENSG00000143590	EFNA3	ephrin A3
chr1	155100270	155100419		X		Promoter (<=1kb)	1	155100349	155107386	7038	1	1942	uc001fhh.3	0	ENSG00000169242	EFNA1	ephrin A1
chr1	155108184	155108333		X		Promoter (<=1kb)	1	155108288	155111334	3047	1	55974	uc001fhj.4	0	ENSG00000169241	SLC50A1	solute carrier family 50 member 1
chr1	155145784	155145933		X		Promoter (<=1kb)	1	155141884	155145804	3921	2	200185	uc001fho.3	0	ENSG00000163463	KRTCAP2	keratinocyte associated protein 2
chr1	155178423	155178572		X		Promoter (<=1kb)	1	155178490	155183624	5135	1	4580	uc001fjb.3	0	ENSG00000173171	MTX1	metaxin 1
chr1	155178922	155179071		X		Promoter (<=1kb)	1	155170242	155178969	8728	2	7059	uc001fja.2	0	ENSG00000169231	THBS3	thrombospondin 3
chr1	155197321	155197470		X		Promoter (<=1kb)	1	155183616	155197325	13710	2	2630	uc001fje.4	0	ENSG00000160766	GBAP1	glucosylceramidase beta pseudogene 1
chr1	155214447	155214596		X		Promoter (<=1kb)	1	155204239	155214653	10415	2	2629	uc001fjk.3	57	ENSG00000177628	GBA	glucosylceramidase beta
chr1	155247025	155247174		X		Promoter (<=1kb)	1	155247218	155258498	11281	1	57657	uc010pfz.2	-44	ENSG00000143630	HCN3	hyperpolarization activated cyclic nucleotide gated potassium channel 3
chr1	155278442	155278591		X		Promoter (<=1kb)	1	155278539	155290457	11919	1	2224	uc001fkc.2	0	ENSG00000160752	FDPS	farnesyl diphosphate synthase
chr1	155293081	155293230		X		Promoter (<=1kb)	1	155293285	155300909	7625	1	23623	uc009wqo.1	-55	ENSG00000160753	RUSC1	RUN and SH3 domain containing 1
chr1	155293562	155293711		X		Promoter (<=1kb)	1	155293728	155300909	7182	1	23623	uc001fkl.2	-17	ENSG00000160753	RUSC1	RUN and SH3 domain containing 1
chr1	155294128	155294277		X		Promoter (<=1kb)	1	155294186	155300909	6724	1	23623	uc001fkn.3	0	ENSG00000160753	RUSC1	RUN and SH3 domain containing 1
chr1	155829158	155829307			X	Promoter (<=1kb)	1	155829260	155854990	25731	1	23208	uc001fmg.3	0	ENSG00000132718	SYT11	synaptotagmin 11
chr1	156023178	156023327		X		Promoter (<=1kb)	1	156005092	156023516	18425	2	56893	uc001fna.3	189	ENSG00000160803	UBQLN4	ubiquilin 4
chr1	156023727	156023876		X		Promoter (<=1kb)	1	156005092	156023516	18425	2	56893	uc010pgx.2	-211	ENSG00000160803	UBQLN4	ubiquilin 4
chr1	156024457	156024606		X		Promoter (<=1kb)	1	156024517	156028605	4089	1	28956	uc001fnb.3	0	ENSG00000116586	LAMTOR2	"late endosomal/lysosomal adaptor, MAPK and MTOR activator 2"
chr1	156031304	156031453		X		Promoter (<=1kb)	1	156030966	156040295	9330	1	57111	uc001fnc.3	338	ENSG00000132698	RAB25	"RAB25, member RAS oncogene family"
chr1	156052260	156052409		X		Promoter (<=1kb)	1	156052369	156108548	56180	1	4000	uc001fnf.1	0	ENSG00000160789	LMNA	lamin A/C
chr1	156076233	156076382		X		Promoter (8-9kb)	1	156084461	156108548	24088	1	4000	uc001fng.2	-8079	ENSG00000160789	LMNA	lamin A/C
chr1	156076743	156076892		X		Promoter (7-8kb)	1	156084461	156108548	24088	1	4000	uc001fng.2	-7569	ENSG00000160789	LMNA	lamin A/C
chr1	156084447	156084596		X		Promoter (<=1kb)	1	156084461	156108548	24088	1	4000	uc001fng.2	0	ENSG00000160789	LMNA	lamin A/C
chr1	156093585	156093734		X		Promoter (2-3kb)	1	156095951	156108548	12598	1	4000	uc001fnj.3	-2217	ENSG00000160789	LMNA	lamin A/C
chr1	156151502	156151642		X	X	Distal Intergenic	1	156163730	156182587	18858	1	9673	uc001fnp.3	-12088	ENSG00000160785	SLC25A44	solute carrier family 25 member 44
chr1	156154063	156154070	X	X		Promoter (9-10kb)	1	156163730	156182587	18858	1	9673	uc001fnp.3	-9660	ENSG00000160785	SLC25A44	solute carrier family 25 member 44
chr1	156154071	156154212	X	X	X	Promoter (9-10kb)	1	156163730	156182587	18858	1	9673	uc001fnp.3	-9518	ENSG00000160785	SLC25A44	solute carrier family 25 member 44
chr1	156215491	156215640			X	Promoter (<=1kb)	1	156213112	156215778	2667	2	79957	uc031pqe.1	138	ENSG00000160781	PAQR6	progestin and adipoQ receptor family member 6
chr1	156225973	156226122		X		Promoter (8-9kb)	1	156213112	156217908	4797	2	79957	uc031pqi.1	-8065	ENSG00000160781	PAQR6	progestin and adipoQ receptor family member 6
chr1	156261272	156261421		X		3' UTR	1	156262478	156265480	3003	2	112770	uc001foh.4	4059	ENSG00000198715	GLMP	glycosylated lysosomal membrane protein
chr1	156308080	156308229		X		Promoter (<=1kb)	1	156278752	156308206	29455	2	7203	uc001fol.2	0	ENSG00000163468	CCT3	chaperonin containing TCP1 subunit 3
chr1	156326808	156326957		X		Distal Intergenic	1	156338980	156352660	13681	1	57127	uc010phm.2	-12023	ENSG00000132677	RHBG	Rh family B glycoprotein (gene/pseudogene)
chr1	156338152	156338301	X	X		Promoter (<=1kb)	1	156338980	156352660	13681	1	57127	uc010phm.2	-679	ENSG00000132677	RHBG	Rh family B glycoprotein (gene/pseudogene)
chr1	156338926	156339068		X	X	Promoter (<=1kb)	1	156338980	156352660	13681	1	57127	uc010phm.2	0	ENSG00000132677	RHBG	Rh family B glycoprotein (gene/pseudogene)
chr1	156358354	156358503			X	Distal Intergenic	1	156338980	156355013	16034	1	57127	uc031pqo.1	19374	ENSG00000132677	RHBG	Rh family B glycoprotein (gene/pseudogene)
chr1	156391522	156391663		X	X	Promoter (1-2kb)	1	156390133	156390221	89	2	407046	uc001foz.1	-1301	ENSG00000207933	MIR9-1	microRNA 9-1
chr1	156399730	156399879	X	X	X	Promoter (<=1kb)	1	156374055	156399371	25317	2	10485	uc001fox.1	-359	ENSG00000125462	C1orf61	chromosome 1 open reading frame 61
chr1	156400247	156400396		X		Promoter (<=1kb)	1	156395430	156400493	5064	2	10485	uc001fpa.3	97	ENSG00000125462	C1orf61	chromosome 1 open reading frame 61
chr1	156408953	156409099		X	X	Promoter (8-9kb)	1	156395430	156400493	5064	2	10485	uc001fpa.3	-8460	ENSG00000125462	C1orf61	chromosome 1 open reading frame 61
chr1	156409776	156409916		X	X	Promoter (9-10kb)	1	156395430	156400493	5064	2	10485	uc001fpa.3	-9283	ENSG00000125462	C1orf61	chromosome 1 open reading frame 61
chr1	156426394	156426543		X		Distal Intergenic	1	156395430	156400493	5064	2	10485	uc001fpa.3	-25901	ENSG00000125462	C1orf61	chromosome 1 open reading frame 61
chr1	156427070	156427219		X		Distal Intergenic	1	156395430	156400493	5064	2	10485	uc001fpa.3	-26577	ENSG00000125462	C1orf61	chromosome 1 open reading frame 61
chr1	156441398	156441547			X	"Intron (uc001fpb.4/4209, intron 8 of 10)"	1	156433513	156460391	26879	2	4209	uc001fpb.4	18844	ENSG00000116604	MEF2D	myocyte enhancer factor 2D
chr1	156529405	156529478	X	X		"Intron (uc001fpf.3/128239, intron 11 of 37)"	1	156495197	156542396	47200	2	128239	uc001fpf.3	12918	ENSG00000183856	IQGAP3	IQ motif containing GTPase activating protein 3
chr1	156529479	156529554	X	X	X	"Intron (uc001fpf.3/128239, intron 11 of 37)"	1	156495197	156542396	47200	2	128239	uc001fpf.3	12842	ENSG00000183856	IQGAP3	IQ motif containing GTPase activating protein 3
chr1	156618875	156619023	X	X	X	"Intron (uc001fpo.3/63827, intron 6 of 7)"	1	156611740	156629324	17585	1	63827	uc001fpp.3	7135	ENSG00000132692	BCAN	brevican
chr1	156619024	156619024	X	X		"Intron (uc001fpo.3/63827, intron 6 of 7)"	1	156611740	156629324	17585	1	63827	uc001fpp.3	7284	ENSG00000132692	BCAN	brevican
chr1	156638106	156638255	X	X		Downstream (<1kb)	1	156638556	156647189	8634	2	10763	uc001fpq.3	8934	ENSG00000132688	NES	nestin
chr1	156645596	156645745			X	Promoter (1-2kb)	1	156638556	156647189	8634	2	10763	uc001fpq.3	1444	ENSG00000132688	NES	nestin
chr1	156647132	156647281		X		Promoter (<=1kb)	1	156638556	156647189	8634	2	10763	uc001fpq.3	0	ENSG00000132688	NES	nestin
chr1	156675334	156675483		X		Promoter (<=1kb)	1	156669400	156675459	6060	2	1382	uc001fpr.3	0	ENSG00000143320	CRABP2	cellular retinoic acid binding protein 2
chr1	156676163	156676312		X		Promoter (<=1kb)	1	156669400	156675608	6209	2	1382	uc021pbi.1	-555	ENSG00000143320	CRABP2	cellular retinoic acid binding protein 2
chr1	156681048	156681197		X		Promoter (5-6kb)	1	156669400	156675608	6209	2	1382	uc021pbi.1	-5440	ENSG00000143320	CRABP2	cellular retinoic acid binding protein 2
chr1	156698517	156698666		X		Promoter (<=1kb)	1	156698263	156706752	8490	1	51093	uc001fpv.3	254	ENSG00000143303	RRNAD1	ribosomal RNA adenine dimethylase domain containing 1
chr1	156710959	156711108		X		Promoter (<=1kb)	1	156707094	156710923	3830	2	79590	uc001fpx.1	-36	ENSG00000143314	MRPL24	mitochondrial ribosomal protein L24
chr1	156717125	156717274		X		"Intron (uc009wsd.3/3068, intron 1 of 5)"	1	156711899	156721085	9187	2	3068	uc009wsd.3	3811	ENSG00000143321	HDGF	heparin binding growth factor
chr1	156721591	156721740		X		Promoter (<=1kb)	1	156711899	156721543	9645	2	3068	uc001fpy.4	-48	ENSG00000143321	HDGF	heparin binding growth factor
chr1	156743047	156743196	X	X		"Intron (uc001fqa.3/5546, intron 1 of 6)"	1	156737274	156770609	33336	1	5546	uc001fqa.3	5773	ENSG00000143294	PRCC	papillary renal cell carcinoma (translocation-associated)
chr1	156766482	156766631	X	X		"Intron (uc001fqa.3/5546, intron 5 of 6)"	1	156785542	156851642	66101	1	4914	uc001fqf.1	-18911	ENSG00000198400	NTRK1	neurotrophic receptor tyrosine kinase 1
chr1	156830558	156830707		X		Promoter (<=1kb)	1	156830671	156851642	20972	1	4914	uc001fqh.1	0	ENSG00000198400	NTRK1	neurotrophic receptor tyrosine kinase 1
chr1	156919063	156919122	X	X		Promoter (<=1kb)	1	156904632	156918806	14175	2	9826	uc010phu.2	-257	ENSG00000132694	ARHGEF11	Rho guanine nucleotide exchange factor 11
chr1	156919123	156919212	X	X	X	Promoter (<=1kb)	1	156904632	156918806	14175	2	9826	uc010phu.2	-317	ENSG00000132694	ARHGEF11	Rho guanine nucleotide exchange factor 11
chr1	157015590	157015739		X		Promoter (<=1kb)	1	156904632	157015162	110531	2	9826	uc001fqo.3	-428	ENSG00000132694	ARHGEF11	Rho guanine nucleotide exchange factor 11
chr1	157204703	157204852	X	X		Distal Intergenic	1	157102976	157108383	5408	2	2117	uc001fqt.3	-96320	ENSG00000117036	ETV3	ETS variant 3
chr1	157210619	157210727	X	X	X	Distal Intergenic	1	157102976	157108383	5408	2	2117	uc001fqt.3	-102236	ENSG00000117036	ETV3	ETS variant 3
chr1	157210728	157210768	X	X		Distal Intergenic	1	157102976	157108383	5408	2	2117	uc001fqt.3	-102345	ENSG00000117036	ETV3	ETS variant 3
chr1	157243369	157243512		X	X	Distal Intergenic	1	157102976	157108383	5408	2	2117	uc001fqt.3	-134986	ENSG00000117036	ETV3	ETS variant 3
chr1	157249465	157249608		X	X	Distal Intergenic	1	157102976	157108383	5408	2	2117	uc001fqt.3	-141082	ENSG00000117036	ETV3	ETS variant 3
chr1	157347170	157347319		X		Distal Intergenic	1	157483167	157522310	39144	2	83416	uc001fqu.3	174991	ENSG00000143297	FCRL5	Fc receptor like 5
chr1	157411968	157412117		X		Distal Intergenic	1	157483167	157522310	39144	2	83416	uc001fqu.3	110193	ENSG00000143297	FCRL5	Fc receptor like 5
chr1	157420849	157420998	X	X		Distal Intergenic	1	157483167	157522310	39144	2	83416	uc001fqu.3	101312	ENSG00000143297	FCRL5	Fc receptor like 5
chr1	158013161	158013310		X		"Intron (uc001frn.4/55243, intron 1 of 14)"	1	158045903	158065844	19942	1	55243	uc009wsq.3	-32593	ENSG00000183853	KIRREL1	kirre like nephrin family adhesion molecule 1
chr1	158162540	158162674		X	X	Distal Intergenic	1	158150685	158152636	1952	1	912	uc009wst.1	11855	ENSG00000158473	CD1D	CD1d molecule
chr1	158182317	158182466		X		Distal Intergenic	1	158150685	158152636	1952	1	912	uc009wst.1	31632	ENSG00000158473	CD1D	CD1d molecule
chr1	158306314	158306463		X		Promoter (4-5kb)	1	158300316	158301321	1006	2	910	uc010pic.1	-4993	ENSG00000158485	CD1B	CD1b molecule
chr1	158969603	158969752		X		Promoter (<=1kb)	1	158969758	158988441	18684	1	3428	uc001ftf.1	-6	ENSG00000163565	IFI16	interferon gamma inducible protein 16
chr1	158975702	158975851		X		Promoter (3-4kb)	1	158979682	159024945	45264	1	3428	uc001ftg.3	-3831	ENSG00000163565	IFI16	interferon gamma inducible protein 16
chr1	158976253	158976402		X		Promoter (3-4kb)	1	158979682	159024945	45264	1	3428	uc001ftg.3	-3280	ENSG00000163565	IFI16	interferon gamma inducible protein 16
chr1	159037891	159038040		X		"Intron (uc001ftj.1/9447, intron 3 of 5)"	1	159032275	159046647	14373	2	9447	uc001ftj.1	8607	ENSG00000163568	AIM2	absent in melanoma 2
chr1	159038219	159038368		X		"Exon (uc001ftj.1/9447, exon 3 of 6)"	1	159032275	159046647	14373	2	9447	uc001ftj.1	8279	ENSG00000163568	AIM2	absent in melanoma 2
chr1	159218335	159218484		X		Distal Intergenic	1	159259506	159278014	18509	1	2205	uc001ftq.3	-41022	ENSG00000179639	FCER1A	Fc fragment of IgE receptor Ia
chr1	159574054	159574203		X		Distal Intergenic	1	159557616	159558661	1046	1	325	uc001ftv.3	16438	ENSG00000132703	APCS	"amyloid P component, serum"
chr1	159633005	159633154		X		Distal Intergenic	1	159682079	159684379	2301	2	1401	uc001ftw.3	51225	ENSG00000132693	CRP	C-reactive protein
chr1	159718406	159718555	X	X		Distal Intergenic	1	159750759	159752333	1575	1	54935	uc001ftz.1	-32204	ENSG00000158716	DUSP23	dual specificity phosphatase 23
chr1	159830407	159830556		X		Promoter (1-2kb)	1	159824106	159832447	8342	2	391123	uc001fuh.3	1891	ENSG00000243284	VSIG8	V-set and immunoglobulin domain containing 8
chr1	159886186	159886335		X		Downstream (1-2kb)	1	159887897	159893507	5611	2	8407	uc031pqt.1	7172	ENSG00000158710	TAGLN2	transgelin 2
chr1	159895311	159895460		X		Promoter (<=1kb)	1	159887897	159895332	7436	2	8407	uc001fun.2	0	ENSG00000158710	TAGLN2	transgelin 2
chr1	159915423	159915572		X		Promoter (<=1kb)	1	159896829	159915386	18558	2	57549	uc001fur.2	-37	ENSG00000085552	IGSF9	immunoglobulin superfamily member 9
chr1	160016421	160016570		X	X	"Intron (uc001fuw.2/3766, intron 1 of 1)"	1	159997462	160001783	4322	2	93183	uc001fuv.1	-14638	ENSG00000143315	PIGM	phosphatidylinositol glycan anchor biosynthesis class M
chr1	160023533	160023682	X			"Intron (uc001fuw.2/3766, intron 1 of 1)"	1	160007257	160040051	32795	2	3766	uc001fuw.2	16369	ENSG00000177807	KCNJ10	potassium voltage-gated channel subfamily J member 10
chr1	160040059	160040208		X		Promoter (<=1kb)	1	160007257	160040051	32795	2	3766	uc001fuw.2	-8	ENSG00000177807	KCNJ10	potassium voltage-gated channel subfamily J member 10
chr1	160068309	160068458		X		Promoter (<=1kb)	1	160061129	160068439	7311	2	93185	uc001fuz.3	0	ENSG00000162729	IGSF8	immunoglobulin superfamily member 8
chr1	160068797	160068946		X		Promoter (<=1kb)	1	160061129	160068618	7490	2	93185	uc009wtf.3	-179	ENSG00000162729	IGSF8	immunoglobulin superfamily member 8
chr1	160232234	160232383		X		Promoter (<=1kb)	1	160185505	160232277	46773	2	50717	uc001fvo.2	0	ENSG00000132716	DCAF8	DDB1 and CUL4 associated factor 8
chr1	160370151	160370300		X		Promoter (<=1kb)	1	160370231	160398468	28238	1	57216	uc001fwb.2	0	ENSG00000162738	VANGL2	VANGL planar cell polarity protein 2
chr1	160510030	160510179		X		Downstream (<1kb)	1	160460431	160493052	32622	2	114836	uc009wtm.2	-16978	ENSG00000162739	SLAMF6	SLAM family member 6
chr1	160537247	160537382		X	X	"Intron (uc001fwf.4/8832, intron 1 of 6)"	1	160510884	160549306	38423	2	8832	uc001fwf.4	11924	ENSG00000066294	CD84	CD84 molecule
chr1	160589713	160589862	X	X		"Intron (uc001fwl.4/6504, intron 4 of 6)"	1	160579891	160617081	37191	2	6504	uc001fwl.4	27219	ENSG00000117090	SLAMF1	signaling lymphocytic activation molecule family member 1
chr1	160600453	160600524	X	X	X	"Intron (uc001fwl.4/6504, intron 3 of 6)"	1	160579891	160617081	37191	2	6504	uc001fwl.4	16557	ENSG00000117090	SLAMF1	signaling lymphocytic activation molecule family member 1
chr1	160600525	160600602	X	X		"Intron (uc001fwl.4/6504, intron 3 of 6)"	1	160579891	160617081	37191	2	6504	uc001fwl.4	16479	ENSG00000117090	SLAMF1	signaling lymphocytic activation molecule family member 1
chr1	160606098	160606247		X		3' UTR	1	160579891	160617081	37191	2	6504	uc001fwl.4	10834	ENSG00000117090	SLAMF1	signaling lymphocytic activation molecule family member 1
chr1	160628343	160628492		X		Distal Intergenic	1	160605541	160617081	11541	2	6504	uc001fwm.3	-11262	ENSG00000117090	SLAMF1	signaling lymphocytic activation molecule family member 1
chr1	160635342	160635491		X		Distal Intergenic	1	160605541	160617081	11541	2	6504	uc001fwm.3	-18261	ENSG00000117090	SLAMF1	signaling lymphocytic activation molecule family member 1
chr1	160635977	160636126	X			Distal Intergenic	1	160605541	160617081	11541	2	6504	uc001fwm.3	-18896	ENSG00000117090	SLAMF1	signaling lymphocytic activation molecule family member 1
chr1	160836172	160836315	X	X	X	Promoter (3-4kb)	1	160808640	160832692	24053	2	51744	uc010pjt.2	-3480	ENSG00000122223	CD244	CD244 molecule
chr1	160836316	160836321	X	X		Promoter (3-4kb)	1	160808640	160832692	24053	2	51744	uc010pjt.2	-3624	ENSG00000122223	CD244	CD244 molecule
chr1	160874673	160874822		X		Distal Intergenic	1	160846330	160854960	8631	2	55600	uc001fxc.3	-19713	ENSG00000179914	ITLN1	intelectin 1
chr1	160881400	160881549		X		Distal Intergenic	1	160846330	160854960	8631	2	55600	uc001fxc.3	-26440	ENSG00000179914	ITLN1	intelectin 1
chr1	160917126	160917275		X		"Intron (uc001fxd.3/142683, intron 7 of 7)"	1	160914816	160924589	9774	2	142683	uc001fxd.3	7314	ENSG00000158764	ITLN2	intelectin 2
chr1	160919081	160919082	X	X		"Intron (uc001fxd.3/142683, intron 6 of 7)"	1	160914816	160924589	9774	2	142683	uc001fxd.3	5507	ENSG00000158764	ITLN2	intelectin 2
chr1	160919083	160919230	X	X	X	"Intron (uc001fxd.3/142683, intron 6 of 7)"	1	160914816	160924589	9774	2	142683	uc001fxd.3	5359	ENSG00000158764	ITLN2	intelectin 2
chr1	160960173	160960322			X	Distal Intergenic	1	160965001	160990902	25902	2	50848	uc010pjv.2	30580	ENSG00000158769	F11R	F11 receptor
chr1	160991046	160991195		X		Promoter (<=1kb)	1	160965001	160991133	26133	2	50848	uc009wtt.3	0	ENSG00000158769	F11R	F11 receptor
chr1	161067567	161067716		X		Promoter (<=1kb)	1	161068151	161070138	1988	1	126823	uc001fxq.3	-435	ENSG00000162755	KLHDC9	kelch domain containing 9
chr1	161087779	161087928		X		Promoter (<=1kb)	1	161087862	161090984	3123	1	4817	uc001fxv.2	0	ENSG00000158793	NIT1	nitrilase 1
chr1	161102274	161102423		X		Promoter (<=1kb)	1	161090769	161102256	11488	2	9191	uc001fxz.3	-18	ENSG00000158796	DEDD	death effector domain containing
chr1	161147272	161147421		X		Promoter (<=1kb)	1	161141100	161147758	6659	2	8703	uc001fyq.2	337	ENSG00000158850	B4GALT3	"beta-1,4-galactosyltransferase 3"
chr1	161359700	161359849		X		Distal Intergenic	1	161334521	161337673	3153	2	257177	uc001gal.4	-22027	ENSG00000188931	CFAP126	cilia and flagella associated protein 126
chr1	161500713	161500862		X		Distal Intergenic	1	161494036	161496687	2652	1	3310	uc001gaq.3	6677	ENSG00000173110	HSPA6	heat shock protein family A (Hsp70) member 6
chr1	161510030	161510179		X		"Exon (uc021pdg.1/uc021pdg.1, exon 1 of 1)"	1	161511551	161519818	8268	2	2214	uc001gar.3	9639	ENSG00000203747	FCGR3A	Fc fragment of IgG receptor IIIa
chr1	161582186	161582335		X		Distal Intergenic	1	161575849	161578341	2493	1	3311	uc010pkp.1	6337	NA	HSPA7	heat shock protein family A (Hsp70) member 7
chr1	162126147	162126288		X	X	Promoter (<=1kb)	1	162126897	162126972	76	1	100616386	uc021pdp.1	-609	ENSG00000266144	MIR4654	microRNA 4654
chr1	162163117	162163234	X	X	X	"Intron (uc010pkr.1/9722, intron 2 of 7)"	1	162126897	162126972	76	1	100616386	uc021pdp.1	36220	ENSG00000266144	MIR4654	microRNA 4654
chr1	162163235	162163266	X	X		"Intron (uc010pkr.1/9722, intron 2 of 7)"	1	162126897	162126972	76	1	100616386	uc021pdp.1	36338	ENSG00000266144	MIR4654	microRNA 4654
chr1	162163695	162163844		X		"Intron (uc010pkr.1/9722, intron 2 of 7)"	1	162126897	162126972	76	1	100616386	uc021pdp.1	36798	ENSG00000266144	MIR4654	microRNA 4654
chr1	162342623	162342772		X	X	Downstream (<1kb)	1	162343515	162346644	3130	2	284680	uc001gbx.2	3872	ENSG00000171722	SPATA46	spermatogenesis associated 46
chr1	162346709	162346858			X	Promoter (<=1kb)	1	162343515	162346644	3130	2	284680	uc001gbx.2	-65	ENSG00000171722	SPATA46	spermatogenesis associated 46
chr1	162347757	162347780	X	X		Promoter (<=1kb)	1	162348696	162356608	7913	1	400793	uc010pkt.1	-916	ENSG00000239887	C1orf226	chromosome 1 open reading frame 226
chr1	162347781	162347906	X	X	X	Promoter (<=1kb)	1	162348696	162356608	7913	1	400793	uc010pkt.1	-790	ENSG00000239887	C1orf226	chromosome 1 open reading frame 226
chr1	162367914	162368063		X		"Intron (uc001gbz.1/117157, intron 3 of 3)"	1	162365056	162381928	16873	2	117157	uc001gbz.1	13865	ENSG00000198574	SH2D1B	SH2 domain containing 1B
chr1	162390067	162390149		X	X	Promoter (8-9kb)	1	162365056	162381928	16873	2	117157	uc001gca.1	-8139	ENSG00000198574	SH2D1B	SH2 domain containing 1B
chr1	162531129	162531278		X		Promoter (<=1kb)	1	162531296	162569633	38338	1	6675	uc001gce.4	-18	ENSG00000117143	UAP1	UDP-N-acetylglucosamine pyrophosphorylase 1
chr1	162760220	162760369		X		Promoter (<=1kb)	1	162760496	162782608	22113	1	51478	uc001gci.3	-127	ENSG00000132196	HSD17B7	hydroxysteroid 17-beta dehydrogenase 7
chr1	162802391	162802540		X		"Intron (uc009wuw.1/339512, intron 1 of 1)"	1	162794248	162825573	31326	2	339512	uc009wuw.1	23033	ENSG00000185860	CCDC190	coiled-coil domain containing 190
chr1	162803109	162803258		X		"Intron (uc009wuw.1/339512, intron 1 of 1)"	1	162794248	162825573	31326	2	339512	uc009wuw.1	22315	ENSG00000185860	CCDC190	coiled-coil domain containing 190
chr1	162855204	162855353	X	X		Distal Intergenic	1	162824087	162838605	14519	2	339512	uc009wux.1	-16599	ENSG00000185860	CCDC190	coiled-coil domain containing 190
chr1	162859963	162860112	X	X		Distal Intergenic	1	162824087	162838605	14519	2	339512	uc009wux.1	-21358	ENSG00000185860	CCDC190	coiled-coil domain containing 190
chr1	162863188	162863337		X		Distal Intergenic	1	162824087	162838605	14519	2	339512	uc009wux.1	-24583	ENSG00000185860	CCDC190	coiled-coil domain containing 190
chr1	162907948	162908097		X		Distal Intergenic	1	162824087	162838605	14519	2	339512	uc009wux.1	-69343	ENSG00000185860	CCDC190	coiled-coil domain containing 190
chr1	163074354	163074503		X		Distal Intergenic	1	163041695	163046592	4898	1	5999	uc009wva.3	32659	ENSG00000117152	RGS4	regulator of G protein signaling 4
chr1	163165868	163166017	X	X		"Intron (uc001gcn.3/8490, intron 1 of 4)"	1	163112089	163172963	60875	2	8490	uc001gcn.3	6946	ENSG00000143248	RGS5	regulator of G protein signaling 5
chr1	163172856	163173005		X		Promoter (<=1kb)	1	163112089	163172963	60875	2	8490	uc001gcn.3	0	ENSG00000143248	RGS5	regulator of G protein signaling 5
chr1	163213831	163213943	X	X	X	"Intron (uc021pdu.1/8490, intron 2 of 5)"	1	163112089	163172963	60875	2	8490	uc021pdt.1	-40868	ENSG00000143248	RGS5	regulator of G protein signaling 5
chr1	163213944	163213980	X	X		"Intron (uc021pdu.1/8490, intron 2 of 5)"	1	163112089	163172963	60875	2	8490	uc021pdt.1	-40981	ENSG00000143248	RGS5	regulator of G protein signaling 5
chr1	163214330	163214479	X	X		"Intron (uc021pdu.1/8490, intron 2 of 5)"	1	163112089	163172963	60875	2	8490	uc021pdt.1	-41367	ENSG00000143248	RGS5	regulator of G protein signaling 5
chr1	163268330	163268479	X	X		"Intron (uc021pdu.1/8490, intron 2 of 5)"	1	163112089	163291581	179493	2	8490	uc021pdu.1	23102	ENSG00000143248	RGS5	regulator of G protein signaling 5
chr1	163291570	163291719		X		Promoter (<=1kb)	1	163112089	163291581	179493	2	8490	uc021pdu.1	0	ENSG00000143248	RGS5	regulator of G protein signaling 5
chr1	163531754	163531903		X		Distal Intergenic	1	163291723	163325553	33831	1	83540	uc001gcr.1	240031	ENSG00000143228	NUF2	"NUF2, NDC80 kinetochore complex component"
chr1	163565953	163566102		X		Distal Intergenic	1	163291723	163325553	33831	1	83540	uc001gcr.1	274230	ENSG00000143228	NUF2	"NUF2, NDC80 kinetochore complex component"
chr1	163640419	163640516		X	X	Distal Intergenic	1	163291723	163325553	33831	1	83540	uc001gcr.1	348696	ENSG00000143228	NUF2	"NUF2, NDC80 kinetochore complex component"
chr1	163641232	163641369		X	X	Distal Intergenic	1	163291723	163325553	33831	1	83540	uc001gcr.1	349509	ENSG00000143228	NUF2	"NUF2, NDC80 kinetochore complex component"
chr1	163642662	163642746	X	X	X	Distal Intergenic	1	163291723	163325553	33831	1	83540	uc001gcr.1	350939	ENSG00000143228	NUF2	"NUF2, NDC80 kinetochore complex component"
chr1	163642747	163642811	X	X		Distal Intergenic	1	163291723	163325553	33831	1	83540	uc001gcr.1	351024	ENSG00000143228	NUF2	"NUF2, NDC80 kinetochore complex component"
chr1	163739018	163739025	X	X		Distal Intergenic	1	163291723	163325553	33831	1	83540	uc001gcr.1	447295	ENSG00000143228	NUF2	"NUF2, NDC80 kinetochore complex component"
chr1	163739026	163739167	X	X	X	Distal Intergenic	1	163291723	163325553	33831	1	83540	uc001gcr.1	447303	ENSG00000143228	NUF2	"NUF2, NDC80 kinetochore complex component"
chr1	163740232	163740381	X	X		Distal Intergenic	1	163291723	163325553	33831	1	83540	uc001gcr.1	448509	ENSG00000143228	NUF2	"NUF2, NDC80 kinetochore complex component"
chr1	164026372	164026521		X		Distal Intergenic	1	164528597	164821060	292464	1	5087	uc001gcs.3	-502076	ENSG00000185630	PBX1	PBX homeobox 1
chr1	164156721	164156870		X		Distal Intergenic	1	164528597	164821060	292464	1	5087	uc001gcs.3	-371727	ENSG00000185630	PBX1	PBX homeobox 1
chr1	164528061	164528210		X		Promoter (<=1kb)	1	164528597	164821060	292464	1	5087	uc001gcs.3	-387	ENSG00000185630	PBX1	PBX homeobox 1
chr1	164558255	164558404		X		Promoter (<=1kb)	1	164558766	164854300	295535	1	5087	uc010pkw.1	-362	ENSG00000185630	PBX1	PBX homeobox 1
chr1	164617653	164617795	X		X	"Intron (uc001gcs.3/5087, intron 2 of 7)"	1	164558766	164854300	295535	1	5087	uc010pkw.1	58887	ENSG00000185630	PBX1	PBX homeobox 1
chr1	164659330	164659479		X		"Intron (uc001gcs.3/5087, intron 2 of 7)"	1	164738353	164743878	5526	2	100505795	uc021pdx.1	84399	ENSG00000233693	LOC100505795	uncharacterized LOC100505795
chr1	164681543	164681669	X	X	X	"Intron (uc001gcs.3/5087, intron 2 of 7)"	1	164738353	164743878	5526	2	100505795	uc021pdx.1	62209	ENSG00000233693	LOC100505795	uncharacterized LOC100505795
chr1	164681670	164681692	X	X		"Intron (uc001gcs.3/5087, intron 2 of 7)"	1	164738353	164743878	5526	2	100505795	uc021pdx.1	62186	ENSG00000233693	LOC100505795	uncharacterized LOC100505795
chr1	164744288	164744437		X		Promoter (<=1kb)	1	164738353	164743878	5526	2	100505795	uc021pdx.1	-410	ENSG00000233693	LOC100505795	uncharacterized LOC100505795
chr1	164793336	164793485		X		"Intron (uc001gcs.3/5087, intron 7 of 7)"	1	164738353	164743878	5526	2	100505795	uc021pdx.1	-49458	ENSG00000233693	LOC100505795	uncharacterized LOC100505795
chr1	164825306	164825455		X		"Intron (uc010pkw.1/5087, intron 7 of 7)"	1	164738353	164743878	5526	2	100505795	uc021pdx.1	-81428	ENSG00000233693	LOC100505795	uncharacterized LOC100505795
chr1	164832398	164832519		X	X	"Intron (uc010pkw.1/5087, intron 7 of 7)"	1	164738353	164743878	5526	2	100505795	uc021pdx.1	-88520	ENSG00000233693	LOC100505795	uncharacterized LOC100505795
chr1	164843269	164843418	X	X		"Intron (uc010pkw.1/5087, intron 7 of 7)"	1	164738353	164743878	5526	2	100505795	uc021pdx.1	-99391	ENSG00000233693	LOC100505795	uncharacterized LOC100505795
chr1	164855392	164855480	X	X	X	Distal Intergenic	1	164738353	164743878	5526	2	100505795	uc021pdx.1	-111514	ENSG00000233693	LOC100505795	uncharacterized LOC100505795
chr1	164855481	164855541	X	X		Distal Intergenic	1	164738353	164743878	5526	2	100505795	uc021pdx.1	-111603	ENSG00000233693	LOC100505795	uncharacterized LOC100505795
chr1	164876946	164876975	X	X		Distal Intergenic	1	164738353	164743878	5526	2	100505795	uc021pdx.1	-133068	ENSG00000233693	LOC100505795	uncharacterized LOC100505795
chr1	164876976	164877095	X	X	X	Distal Intergenic	1	164738353	164743878	5526	2	100505795	uc021pdx.1	-133098	ENSG00000233693	LOC100505795	uncharacterized LOC100505795
chr1	164881778	164881927		X		Distal Intergenic	1	164738353	164743878	5526	2	100505795	uc021pdx.1	-137900	ENSG00000233693	LOC100505795	uncharacterized LOC100505795
chr1	164951826	164951975		X		Distal Intergenic	1	164738353	164743878	5526	2	100505795	uc021pdx.1	-207948	ENSG00000233693	LOC100505795	uncharacterized LOC100505795
chr1	164952430	164952579	X	X		Distal Intergenic	1	164738353	164743878	5526	2	100505795	uc021pdx.1	-208552	ENSG00000233693	LOC100505795	uncharacterized LOC100505795
chr1	165155218	165155234	X	X		Distal Intergenic	1	165171104	165182292	11189	2	4009	uc021pdy.1	27058	ENSG00000162761	LMX1A	LIM homeobox transcription factor 1 alpha
chr1	165155235	165155367	X	X	X	Distal Intergenic	1	165171104	165182292	11189	2	4009	uc021pdy.1	26925	ENSG00000162761	LMX1A	LIM homeobox transcription factor 1 alpha
chr1	165177245	165177331		X	X	5' UTR	1	165171104	165182292	11189	2	4009	uc021pdy.1	4961	ENSG00000162761	LMX1A	LIM homeobox transcription factor 1 alpha
chr1	165414278	165414427		X		Promoter (<=1kb)	1	165370159	165414592	44434	2	6258	uc001gda.3	165	ENSG00000143171	RXRG	retinoid X receptor gamma
chr1	165429744	165429893		X		Distal Intergenic	1	165406165	165414592	8428	2	6258	uc001gdb.2	-15152	ENSG00000143171	RXRG	retinoid X receptor gamma
chr1	165430329	165430451		X	X	Distal Intergenic	1	165406165	165414592	8428	2	6258	uc001gdb.2	-15737	ENSG00000143171	RXRG	retinoid X receptor gamma
chr1	165455042	165455082	X	X		"Intron (uc001gdc.2/400794, intron 5 of 6)"	1	165406165	165414592	8428	2	6258	uc001gdb.2	-40450	ENSG00000143171	RXRG	retinoid X receptor gamma
chr1	165455083	165455191	X	X	X	"Intron (uc001gdc.2/400794, intron 5 of 6)"	1	165406165	165414592	8428	2	6258	uc001gdb.2	-40491	ENSG00000143171	RXRG	retinoid X receptor gamma
chr1	165465872	165466021	X	X		"Intron (uc001gdc.2/400794, intron 5 of 6)"	1	165462198	165508849	46652	2	400794	uc010pkx.2	42828	ENSG00000237463	LOC400794	uncharacterized LOC400794
chr1	165530161	165530310			X	"Intron (uc001gde.2/440699, intron 1 of 1)"	1	165458812	165544606	85795	2	400794	uc009wvd.3	14296	ENSG00000237463	LOC400794	uncharacterized LOC400794
chr1	165600317	165600466		X		Promoter (<=1kb)	1	165600110	165625372	25263	1	4259	uc001gdf.3	207	ENSG00000143198	MGST3	microsomal glutathione S-transferase 3
chr1	165667804	165667953		X		Promoter (<=1kb)	1	165631449	165667823	36375	2	223	uc010pky.1	0	ENSG00000143149	ALDH9A1	aldehyde dehydrogenase 9 family member A1
chr1	165765226	165765375		X		"Intron (uc001gdn.4/54499, intron 3 of 8)"	1	165693528	165738159	44632	2	54499	uc031pre.1	-27067	ENSG00000143183	TMCO1	transmembrane and coiled-coil domains 1
chr1	165786153	165786302	X	X		"Intron (uc001gdn.4/54499, intron 1 of 8)"	1	165796732	165880855	84124	1	7371	uc001gdp.3	-10430	ENSG00000143179	UCK2	uridine-cytidine kinase 2
chr1	165870254	165870403		X		Promoter (6-7kb)	1	165877158	165877213	56	1	100500832	uc021pec.1	-6755	ENSG00000283936	MIR3658	microRNA 3658
chr1	165876607	165876756		X		Promoter (<=1kb)	1	165877158	165877213	56	1	100500832	uc021pec.1	-402	ENSG00000283936	MIR3658	microRNA 3658
chr1	166000191	166000340	X	X		Distal Intergenic	1	165877158	165877213	56	1	100500832	uc021pec.1	123033	ENSG00000283936	MIR3658	microRNA 3658
chr1	166105607	166105756		X		"Intron (uc010plc.2/149297, intron 1 of 2)"	1	166123980	166124035	56	2	100126349	uc021peg.1	18279	ENSG00000215952	MIR921	microRNA 921
chr1	166128213	166128248	X	X		Promoter (4-5kb)	1	166123980	166124035	56	2	100126349	uc021peg.1	-4178	ENSG00000215952	MIR921	microRNA 921
chr1	166128249	166128362	X	X	X	Promoter (4-5kb)	1	166123980	166124035	56	2	100126349	uc021peg.1	-4214	ENSG00000215952	MIR921	microRNA 921
chr1	166128997	166129141		X	X	Promoter (4-5kb)	1	166123980	166124035	56	2	100126349	uc021peg.1	-4962	ENSG00000215952	MIR921	microRNA 921
chr1	166136268	166136417		X		Promoter (<=1kb)	1	166039069	166135958	96890	2	149297	uc021pef.1	-310	ENSG00000188859	FAM78B	family with sequence similarity 78 member B
chr1	166166939	166167086	X	X	X	Distal Intergenic	1	166039069	166135958	96890	2	149297	uc021pef.1	-30981	ENSG00000188859	FAM78B	family with sequence similarity 78 member B
chr1	166167087	166167088	X	X		Distal Intergenic	1	166039069	166135958	96890	2	149297	uc021pef.1	-31129	ENSG00000188859	FAM78B	family with sequence similarity 78 member B
[truncated: 32,626 more rows]
