# Supplementary material for: GATA6 mutations in hiPSCs inform mechanisms for maldevelopment of the heart, pancreas, and diaphragm
Source: eLife. 2020 Oct 15;9:e53278. doi: 10.7554/eLife.53278 (PMC7593088; doi:10.7554/eLife.53278)
Supplement: Supplementary file 7. [file elife-53278-supp7.xlsx]

## Sheet: Table
Supplemental Table 6: DNA binding motifs found in ≥ 2-fold diminished ATAC peaks in gene promoters (0-10 kb from TSS) of differentially expressed genes in day 4 GATA6 LOF and missense cells
Motif	Name	Lost in HT	Lost in HM	Lost in MISS	P.value (HT)	Target Sequences with Motif (HT)	% of Target Sequences with Motif (HT)	Background Sequences with Motifs (HT)	% of Background Sequences with Motif (HT)	% Target - % Background (HT)	P.value (HM)	Target Sequences with Motif (HM)	% of Target Sequences with Motif (HM)	Background Sequences with Motifs (HM)	% of Background Sequences with Motif (HM)	% Target - % Background (HM)	P.value (MISS)	Target Sequences with Motif (MISS)	% of Target Sequences with Motif (MISS)	Background Sequences with Motifs (MISS)	% of Background Sequences with Motif (MISS)	% Target - % Background (MISS)
AGCTATGCGACTGCATCGTAAGCTGTACCGATATCGAGTC	Gata6(Zf)/HUG1N-GATA6-ChIP-Seq(GSE51936)/Homer	X	X	X	1e-85	161	0.3618	2603.5	0.0542	0.3076	1e-184	591	0.0888	818.8	0.0208	0.068	1e-49	97	0.236	1667.1	0.0353	0.2007
AGCTAGTCATGCAGCTACGTCGTAACGTAGTCCGATATGC	Gata2(Zf)/K562-GATA2-ChIP-Seq(GSE18829)/Homer	X	X	X	1e-75	132	0.2966	1873.4	0.039	0.2576	1e-172	504	0.0757	635.2	0.0162	0.0595	1e-48	84	0.2044	1193.5	0.0253	0.1791
TACGATGCGCTAACTGCGTAACGTCGTACTGATACGTCGA	Gata4(Zf)/Heart-Gata4-ChIP-Seq(GSE35151)/Homer	X	X	X	1e-74	159	0.3573	3006.2	0.0626	0.2947	1e-166	619	0.093	979	0.0249	0.0681	1e-45	99	0.2409	1927.5	0.0409	0.2
GCTAATCGGCTAGACTGCTATCGATAGCTCGA	GATA3(Zf)/iTreg-Gata3-ChIP-Seq(GSE20898)/Homer	X	X	X	1e-73	192	0.4315	4737	0.0986	0.3329	1e-144	749	0.1126	1518.2	0.0386	0.074	1e-45	121	0.2944	3077	0.0652	0.2292
TAGCGCTAACTGCGTAACGTCGTACGTATACGTCAGTCGA	Gata1(Zf)/K562-GATA1-ChIP-Seq(GSE18829)/Homer	X	X	X	1e-71	123	0.2764	1683.1	0.035	0.2414	1e-177	481	0.0723	562.3	0.0143	0.058	1e-52	84	0.2044	1074.6	0.0228	0.1816
CTAGACTGTGCACGATCGTACTGAATCGACTGGACTAGCT	At1g49010(MYBrelated)/col-At1g49010-DAP-Seq(GSE60143)/Homer	X	X	X	1e-46	172	0.3865	5686.9	0.1184	0.2681	1e-84	723	0.1087	1928.2	0.0491	0.0596	1e-29	111	0.2701	3765.7	0.0798	0.1903
CGTAAGTCTGACAGCTACGTCGTAACGTAGTC	At5g05790(MYBrelated)/col-At5g05790-DAP-Seq(GSE60143)/Homer	X	X	X	1e-44	116	0.2607	2648.5	0.0551	0.2056	1e-114	486	0.073	844.3	0.0215	0.0515	1e-33	81	0.1971	1767.1	0.0375	0.1596
ACTGCGTAACGTCGTACTGAACTGTCAGGCAT	At3g11280(MYBrelated)/col-At3g11280-DAP-Seq(GSE60143)/Homer	X	X	X	1e-44	113	0.2539	2528.1	0.0526	0.2013	1e-112	472	0.0709	812.8	0.0207	0.0502	1e-33	79	0.1922	1685.2	0.0357	0.1565
CTGACTGAAGTCTAGCGACTGCATCTGAAGCTAGTCAGTC	At5g08520(MYBrelated)/colamp-At5g08520-DAP-Seq(GSE60143)/Homer	X	X	X	1e-36	117	0.2629	3258.6	0.0678	0.1951	1e-76	492	0.0739	1128.1	0.0287	0.0452	1e-22	74	0.18	2179.4	0.0462	0.1338
CTGAGATCGCATACTGCGTAACGTCGTACGTATACGTCGA	PQM-1(?)/cElegans-L3-ChIP-Seq(modEncode)/Homer	X	X	X	1e-35	66	0.1483	966.7	0.0201	0.1282	1e-96	226	0.034	223.8	0.0057	0.0283	1e-24	41	0.0998	553.2	0.0117	0.0881
GCATGCATGCTAGCATGATCCGATACGTCGTAACGTAGTCGACTGCATGCATGCATGCAT	At5g58900(MYBrelated)/colamp-At5g58900-DAP-Seq(GSE60143)/Homer	X	X	X	1e-35	128	0.2876	4008	0.0834	0.2042	1e-64	448	0.0673	1065.7	0.0271	0.0402	1e-23	81	0.1971	2566.3	0.0544	0.1427
GCATCTAGCTAGCGTAAGCTCGTACTGACATGCTAGGCAT	AT5G56840(MYBrelated)/colamp-AT5G56840-DAP-Seq(GSE60143)/Homer	X	X	X	1e-22	102	0.2292	3683.4	0.0767	0.1525	1e-29	380	0.0571	1197.6	0.0305	0.0266	1e-10	56	0.1363	2469.5	0.0524	0.0839
CGTACGTAGCATACTGCGTAAGCTCTGACGTATACGCTGA	ELT-3(Gata)/cElegans-L1-ELT3-ChIP-Seq(modEncode)/Homer	X	X	X	1e-20	52	0.1169	1097.2	0.0228	0.0941	1e-80	206	0.031	225.6	0.0057	0.0253	1e-21	41	0.0998	666.7	0.0141	0.0857
GTACGCATACGTCGTAACGTAGTCAGTCCTGA	At5g47390(MYBrelated)/col-At5g47390-DAP-Seq(GSE60143)/Homer	X	X	X	1e-20	98	0.2202	3699	0.077	0.1432	1e-23	381	0.0573	1297.9	0.033	0.0243	1e-05	47	0.1144	2550.3	0.0541	0.0603
CGATCTAGCTGAATGCCTGATCGACGTACTGATCGATAGCAGTCCGTAACTGTCGAATGC	Hand2(bHLH)/Mesoderm-Hand2-ChIP-Seq(GSE61475)/Homer	X	X	X	1e-19	58	0.1303	1497.8	0.0312	0.0991	1e-19	238	0.0358	727.7	0.0185	0.0173	1e-05	27	0.0657	1097	0.0233	0.0424
CTAGAGTCAGCTACTGCGTACAGTCGTACTGATAGCTGAC	Unknown5/Drosophila-Promoters/Homer	X	X	X	1e-18	58	0.1303	1545.8	0.0322	0.0981	1e-45	316	0.0475	751.1	0.0191	0.0284	1e-20	50	0.1217	1117	0.0237	0.098
GATCGCATACGTCGTAACGTAGTCAGTCCGTA	AT5G61620(MYBrelated)/colamp-AT5G61620-DAP-Seq(GSE60143)/Homer	X	X	X	1e-18	102	0.2292	4270.7	0.0889	0.1403	1e-19	418	0.0628	1543.4	0.0393	0.0235	0.0001	48	0.1168	2910.6	0.0617	0.0551
CGATCTAGACGTGTCACGTACGTAAGTCCGTA	Foxo3(Forkhead)/U2OS-Foxo3-ChIP-Seq(E-MTAB-2701)/Homer	X	X	X	1e-14	54	0.1213	1655	0.0345	0.0868	1e-21	197	0.0296	538	0.0137	0.0159	0.001	23	0.056	1177.6	0.025	0.031
CTAGACGTGCATTCGAGTCAGCATATCGCGTACAGTAGCTCTGATGCA	HNF1b(Homeobox)/PDAC-HNF1B-ChIP-Seq(GSE64557)/Homer	X	X	X	1e-13	21	0.0472	231.4	0.0048	0.0424	1e-08	40	0.006	80	0.002	0.004	1e-05	11	0.0268	208.4	0.0044	0.0224
ATGCAGTCGCATAGCTACGTTCAGCGATAGCTGATCATCG	Sox10(HMG)/SciaticNerve-Sox3-ChIP-Seq(GSE35132)/Homer	X	X	X	1e-11	92	0.2067	4653.4	0.0969	0.1098	1e-21	606	0.0911	2389.1	0.0608	0.0303	1e-05	57	0.1387	3361.8	0.0713	0.0674
ATGCGATCCGTAAGCTCAGTATCGGCATAGCTGACTACTG	Sox17(HMG)/Endoderm-Sox17-ChIP-Seq(GSE61475)/Homer	X	X	X	1e-11	51	0.1146	1807.9	0.0376	0.077	1e-21	278	0.0418	882.1	0.0224	0.0194	1e-06	32	0.0779	1296.5	0.0275	0.0504
CTAGCTAGGCATCGATCTGAGTCAGCTAATGCCGTACAGTGACTCGTATGCA	Hnf1(Homeobox)/Liver-Foxa2-Chip-Seq(GSE25694)/Homer	X		X	1e-11	18	0.0404	209.3	0.0044	0.036							1e-08	13	0.0316	158.5	0.0034	0.0282
ATGCGATCCGATACGTACGTACTGCAGTAGCT	Sox3(HMG)/NPC-Sox3-ChIP-Seq(GSE33059)/Homer	X	X	X	1e-10	94	0.2112	5035.7	0.1048	0.1064	1e-20	610	0.0917	2433.6	0.0619	0.0298	1e-06	60	0.146	3540	0.075	0.071
CGATCGTAGCATCTAGACTGCGTAACGTGTCACGTACTAGCTAGGCAT	At1g19000(MYBrelated)/colamp-At1g19000-DAP-Seq(GSE60143)/Homer	X	X	X	1e-10	55	0.1236	2165.6	0.0451	0.0785	1e-16	186	0.028	557	0.0142	0.0138	0.001	25	0.0608	1421.9	0.0301	0.0307
AGTCAGTCCGATACGTACGTACTGACGTAGCTAGTCAGTC	Sox4(HMG)/proB-Sox4-ChIP-Seq(GSE50066)/Homer	X	X	X	1e-10	59	0.1326	2403.8	0.05	0.0826	1e-12	334	0.0502	1307.1	0.0333	0.0169	1e-05	35	0.0852	1733.7	0.0368	0.0484
AGCTTGACCGATCGATCTAGACGTCAGTCAGTGCTAAGTC	FOXK1(Forkhead)/HEK293-FOXK1-ChIP-Seq(GSE51673)/Homer	X	X	X	1e-09	56	0.1258	2467.3	0.0514	0.0744	1e-19	257	0.0386	808.4	0.0206	0.018	0.0001	34	0.0827	1740.5	0.0369	0.0458
ATGCGACTACGTCTAGACGTACGTACGTCTGAGATCGCTAAGCTCGTA	Foxa2(Forkhead)/Liver-Foxa2-ChIP-Seq(GSE25694)/Homer	X	X	X	1e-09	48	0.1079	1820.5	0.0379	0.07	1e-16	199	0.0299	619.6	0.0158	0.0141	1e-06	31	0.0754	1271	0.0269	0.0485
AGTCACGTACTGAGCTACGTACGTGTCAAGTC	Foxo1(Forkhead)/RAW-Foxo1-ChIP-Seq(Fan_et_al.)/Homer	X	X		1e-09	99	0.2225	5741.2	0.1195	0.103	1e-09	594	0.0893	2713.9	0.069	0.0203
ATGCCTGAATCGTACGAGTCCGATTCAGCGATCTAGAGCTGTCAGTCACGTAAGTCCGTATACGCTGA	Fox:Ebox(Forkhead,bHLH)/Panc1-Foxa2-ChIP-Seq(GSE47459)/Homer	X		X	1e-09	55	0.1236	2281	0.0475	0.0761							1e-05	34	0.0827	1599.2	0.0339	0.0488
CTGATCGACGTAATGCCGTACGTACGATCTAGTCAGGATC	Sox15(HMG)/CPA-Sox15-ChIP-Seq(GSE62909)/Homer	X		X	1e-09	66	0.1483	3144.3	0.0655	0.0828							0.001	38	0.0925	2442.6	0.0518	0.0407
ATGCAGTCGATCCGTAACGTACGTACTGACGTAGCTGATC	Sox2(HMG)/mES-Sox2-ChIP-Seq(GSE11431)/Homer	X	X	X	1e-08	54	0.1213	2373.8	0.0494	0.0719	1e-20	347	0.0521	1203.6	0.0306	0.0215	1e-07	40	0.0973	1741.7	0.0369	0.0604
ATGCGTACCGTAAGCTGCATTACGAGCTAGCTAGTCAGCT	Sox6(HMG)/Myotubes-Sox6-ChIP-Seq(GSE32627)/Homer	X	X	X	1e-08	77	0.173	4188.5	0.0872	0.0858	1e-16	480	0.0721	1921.7	0.0489	0.0232	1e-05	50	0.1217	2954.5	0.0626	0.0591
AGTCTAGCGACTACGTCTAGACGTACGTACGTCTGAAGTCGCTAGACTCGTACTAGACTG	Foxa3(Forkhead)/Liver-Foxa3-ChIP-Seq(GSE77670)/Homer	X	X	X	1e-08	26	0.0584	696.3	0.0145	0.0439	1e-13	93	0.014	228.1	0.0058	0.0082	1e-05	17	0.0414	498	0.0106	0.0308
CTGATCAGCAGTCTAGACTGCTAGGATCATCGACTGCTGATCAGGATC	Sp5(Zf)/mES-Sp5.Flag-ChIP-Seq(GSE72989)/Homer	X	X	X	1e-07	94	0.2112	5656.6	0.1178	0.0934	0	3371	0.5066	9417.1	0.2396	0.267	1e-14	147	0.3577	9029.6	0.1914	0.1663
GACTGCATCTAGCGATGATCTCGACATGGATC	Tgif1(Homeobox)/mES-Tgif1-ChIP-Seq(GSE55404)/Homer	X	X	X	1e-07	140	0.3146	9751.6	0.203	0.1116	1e-32	1033	0.1552	4201.6	0.1069	0.0483	0.01	82	0.1995	6911.2	0.1465	0.053
CGTAGCTACGATCTAGACGTGTCACGTACGTAAGTCCGTATGCATACG	FoxL2(Forkhead)/Ovary-FoxL2-ChIP-Seq(GSE60858)/Homer	X	X	X	1e-07	43	0.0966	1876.5	0.0391	0.0575	1e-12	181	0.0272	601.1	0.0153	0.0119	0.0001	28	0.0681	1359.8	0.0288	0.0393
GCATGCATCTGAACGTCTGAACGTCGTACGTACGTAAGTCGTCAGTCA	Foxf1(Forkhead)/Lung-Foxf1-ChIP-Seq(GSE77951)/Homer	X	X	X	1e-07	46	0.1034	1974.5	0.0411	0.0623	1e-12	194	0.0292	653.2	0.0166	0.0126	0.01	23	0.056	1462.3	0.031	0.025
GCTATCGACGTACTAGAGCTGTCAGTCACGTAAGTCCGTA	FOXA1(Forkhead)/LNCAP-FOXA1-ChIP-Seq(GSE27824)/Homer	X	X	X	1e-07	59	0.1326	2916.8	0.0607	0.0719	1e-10	240	0.0361	906.3	0.0231	0.013	0.0001	35	0.0852	2004.8	0.0425	0.0427
GCTATCGACGTACTAGAGCTGTCAGTCACGTAAGTCCGTA	FOXA1(Forkhead)/MCF7-FOXA1-ChIP-Seq(GSE26831)/Homer	X	X	X	1e-07	49	0.1101	2313.2	0.0482	0.0619	1e-10	205	0.0308	734.3	0.0187	0.0121	0.001	30	0.073	1628.4	0.0345	0.0385
TCAGTACGTAGCACGTACTGCGATAGTCCGTATACGAGTC	Meis1(Homeobox)/MastCells-Meis1-ChIP-Seq(GSE48085)/Homer	X	X	X	1e-06	91	0.2045	5672.6	0.1181	0.0864	1e-27	750	0.1127	2944	0.0749	0.0378	0.01	58	0.1411	4447.7	0.0943	0.0468
GCTAGACTGACTTGCACGTAAGTCCGTATAGCGATCGACT	Eomes(T-box)/H9-Eomes-ChIP-Seq(GSE26097)/Homer	X	X	X	1e-06	102	0.2292	6873.2	0.1431	0.0861	1e-16	709	0.1066	3040.4	0.0773	0.0293	1e-12	96	0.2336	5105	0.1082	0.1254
AGCTAGTCAGTCACGTCTAGACGTACGTACGTCGTAAGTCGATCCGTA	FOXP1(Forkhead)/H9-FOXP1-ChIP-Seq(GSE31006)/Homer	X	X		1e-06	26	0.0584	902.7	0.0188	0.0396	1e-15	126	0.0189	330.3	0.0084	0.0105
TACGTAGCGCTACGATCTAGACGTCAGTCAGTGCTAAGTCGTCAGCAT	FOXK2(Forkhead)/U2OS-FOXK2-ChIP-Seq(E-MTAB-2204)/Homer	X	X		1e-06	37	0.0831	1598.7	0.0333	0.0498	1e-12	176	0.0265	574.8	0.0146	0.0119
CGTACGTAGACTCTAGACTGCGTAACGTTCGACTGACATGCTAGGCAT	AT4G00250(GeBP)/col-AT4G00250-DAP-Seq(GSE60143)/Homer	X	X	X	1e-06	35	0.0787	1479.3	0.0308	0.0479	1e-11	130	0.0195	397.5	0.0101	0.0094	0.01	17	0.0414	955.3	0.0203	0.0211
TGACCTAGACTGTAGCCGATACTGATGCCATGATCGATCGATCGTAGCCTGATAGCGCTAACTGCGTAAGCTCGTACTGA	GATA:SCL(Zf,bHLH)/Ter119-SCL-ChIP-Seq(GSE18720)/Homer	X	X	X	1e-05	13	0.0292	291.7	0.0061	0.0231	1e-14	70	0.0105	137.2	0.0035	0.007	0.001	9	0.0219	219.3	0.0046	0.0173
ACGTCTAGAGCTACGTACGTCTGAAGTCGACTAGCTCGTA	FOXM1(Forkhead)/MCF7-FOXM1-ChIP-Seq(GSE72977)/Homer	X	X	X	1e-05	46	0.1034	2481.5	0.0517	0.0517	1e-09	213	0.032	806	0.0205	0.0115	0.0001	32	0.0779	1764.5	0.0374	0.0405
CATGACGTCTAGACGTCAGTACGTCTAGAGTC	PHA-4(Forkhead)/cElegans-Embryos-PHA4-ChIP-Seq(modEncode)/Homer	X	X	X	1e-05	114	0.2562	8017.3	0.1669	0.0893	1e-09	702	0.1055	3291.3	0.0837	0.0218	0.01	72	0.1752	5894	0.125	0.0502
CGTAACTGGTCAACGTATCGCAGTCTAGTCAGCGTAACTGCGTAACGTCGTACTGATACG	GATA3(Zf),DR4/iTreg-Gata3-ChIP-Seq(GSE20898)/Homer	X	X		1e-05	12	0.027	258.7	0.0054	0.0216	1e-07	35	0.0053	72.4	0.0018	0.0035
ACGTCTAGCGTAACGTAGCTCGTATCAGATGC	ATHB34(ZFHD)/colamp-ATHB34-DAP-Seq(GSE60143)/Homer	X	X	X	1e-05	40	0.0899	1932.2	0.0402	0.0497	1e-06	161	0.0242	616.8	0.0157	0.0085	0.01	21	0.0511	1292.8	0.0274	0.0237
GACTGATCGACTACGTCGTAACGTAGTCAGTCCGTAGCATGCTAGCAT	At1g74840(MYBrelated)/col100-At1g74840-DAP-Seq(GSE60143)/Homer	X	X		1e-05	41	0.0921	1952.5	0.0406	0.0515	1e-06	137	0.0206	516.2	0.0131	0.0075
AGTCGATCGCTACGATACGTTACGGCATCTGAGACTACTGAGTCGCTACTGATCGACAGT	Oct4:Sox17(POU,Homeobox,HMG)/F9-Sox17-ChIP-Seq(GSE44553)/Homer	X		X	1e-05	12	0.027	236.9	0.0049	0.0221							0.01	6	0.0146	178.8	0.0038	0.0108
CGTACTAGTCAGTCAGAGTCATGCAGTCGCATAGCTACGTATCGCGAT	Sox9(HMG)/Limb-SOX9-ChIP-Seq(GSE73225)/Homer	X			1e-05	48	0.1079	2437.8	0.0508	0.0571
CTAGTCAGCAGTTCAGACTGACTGGATCCTAGACTGCTAGTCAGATGC	KLF14(Zf)/HEK293-KLF14.GFP-ChIP-Seq(GSE58341)/Homer	X	X	X	0.0001	127	0.2854	10022.5	0.2086	0.0768	0	4071	0.6118	14665.4	0.3731	0.2387	1e-07	182	0.4428	14642.3	0.3104	0.1324
TACGCTAGATGCGATCGTACAGTCCTAGAGTCAGTCAGTCGTACAGTC	Sp1(Zf)/Promoter/Homer	X	X	X	0.0001	36	0.0809	1888.4	0.0393	0.0416	0	2040	0.3066	4491.9	0.1143	0.1923	1e-12	82	0.1995	3932	0.0834	0.1161
GTACCAGTACTGACTGACTGGATCACTGACGTACTGACTGAGTCGATC	KLF6(Zf)/PDAC-KLF6-ChIP-Seq(GSE64557)/Homer	X	X	X	0.0001	77	0.173	5402.2	0.1125	0.0605	1e-267	2657	0.3993	8254.8	0.21	0.1893	1e-08	123	0.2993	8422.6	0.1786	0.1207
TAGCTAGCGACTCTAGAGCTAGTCGTCATGCAACGTATGCGCTATGCA	Pbx3(Homeobox)/GM12878-PBX3-ChIP-Seq(GSE32465)/Homer	X	X	X	0.0001	17	0.0382	612.8	0.0128	0.0254	1e-31	169	0.0254	347.5	0.0088	0.0166	0.01	11	0.0268	483.5	0.0102	0.0166
CTAGTCAGCTGACTGACTAGCTGACATGCATGCTGACTAGCTAGCGTACTAGCGTAGTCA	TF3A(C2H2)/col-TF3A-DAP-Seq(GSE60143)/Homer	X	X	X	0.0001	88	0.1978	6214.7	0.1294	0.0684	1e-28	1150	0.1728	4933.5	0.1255	0.0473	0.001	72	0.1752	5511.4	0.1168	0.0584
AGCTCATGGCATGATCTGCACTAGGATCACGT	Tgif2(Homeobox)/mES-Tgif2-ChIP-Seq(GSE55404)/Homer	X	X	X	0.0001	136	0.3056	10603.7	0.2207	0.0849	1e-18	1085	0.1631	4951.7	0.126	0.0371	0.01	87	0.2117	7818.6	0.1658	0.0459
ACGTCTGACGTAACGTACGTCGTATGCAATCG	ATHB24(ZFHD)/colamp-ATHB24-DAP-Seq(GSE60143)/Homer	X			0.0001	35	0.0787	1713.6	0.0357	0.043
CGATCTAGTCGAAGCTCGATCTGACGTAAGCTACTGCTAGATGCGATC	Hoxb4(Homeobox)/ES-Hoxb4-ChIP-Seq(GSE34014)/Homer	X			0.0001	14	0.0315	433	0.009	0.0225
CTGACTGACATGATCGAGCTATCGGACTCATGCTGAGTCA	Tbr1(T-box)/Cortex-Tbr1-ChIP-Seq(GSE71384)/Homer	X	X	X	0.001	58	0.1303	3947.4	0.0822	0.0481	1e-10	418	0.0628	1788	0.0455	0.0173	1e-10	64	0.1557	2990	0.0634	0.0923
CGTAGCATCGTACGTAAGTCATCGCTAGGCATGCATCGTA	MYB70(MYB)/col-MYB70-DAP-Seq(GSE60143)/Homer	X	X		0.001	52	0.1169	3342.9	0.0696	0.0473	1e-08	294	0.0442	1213.4	0.0309	0.0133
CGTACTAGACTGACTGGACTCTAGCAGTCTAGCATGGATC	KLF5(Zf)/LoVo-KLF5-ChIP-Seq(GSE49402)/Homer	X	X	X	0.001	91	0.2045	6765.7	0.1408	0.0637	9.88131291682493e-323	3203	0.4814	10265.8	0.2611	0.2203	1e-11	151	0.3674	10275.2	0.2178	0.1496
ACGTCTGACGTAACGTACGTCGTATACGACGT	ATHB25(ZFHD)/colamp-ATHB25-DAP-Seq(GSE60143)/Homer	X		X	0.001	47	0.1056	2876	0.0599	0.0457							0.01	28	0.0681	1926.3	0.0408	0.0273
ATCGAGTCAGTCGACTATGCCTGACTAGACTGTACGGTACCTGACGAT	AP-2gamma(AP2)/MCF7-TFAP2C-ChIP-Seq(GSE21234)/Homer	X			0.001	77	0.173	5684.9	0.1183	0.0547
ATGCCGTAACTGCGTAACGTGCTATCGAAGCTCGATCGTAACGTAGTCCGATACTGGATC	GATA(Zf),IR4/iTreg-Gata3-ChIP-Seq(GSE20898)/Homer	X			0.001	8	0.018	205.4	0.0043	0.0137
GACTACGTCTGACGTAACGTACGTCGTATCAGTGACCATG	ATHB23(ZFHD)/col-ATHB23-DAP-Seq(GSE60143)/Homer	X		X	0.001	38	0.0854	2159.4	0.045	0.0404							0.01	23	0.056	1493.6	0.0317	0.0243
GATCGTACCGATACTGACTGCGTACGTAACGTACTGGATC	TEAD(TEA)/Fibroblast-PU.1-ChIP-Seq(Unpublished)/Homer	X			0.001	31	0.0697	1746	0.0363	0.0334
TCAGATCGGACTACTGGACTCAGTCTAGCGTAGTACCGTACTAGATCG	Tbx20(T-box)/Heart-Tbx20-ChIP-Seq(GSE29636)/Homer	X			0.001	16	0.036	593.6	0.0124	0.0236
TCGACTAGAGTCAGTCCGTACGTAACGTTAGCTCAGTACG	NFY(CCAAT)/Promoter/Homer	X	X	X	0.01	30	0.0674	2002.2	0.0417	0.0257	0	1454	0.2185	1616.5	0.0411	0.1774	0.0001	35	0.0852	1860.2	0.0394	0.0458
GACTTCAGCTAGAGTCAGTCGTACAGTCCTGAAGTCAGTCAGTCGACTAGTCACTGATGC	KLF3(Zf)/MEF-Klf3-ChIP-Seq(GSE44748)/Homer	X	X	X	0.01	37	0.0831	2547.9	0.053	0.0301	1e-303	1805	0.2713	4202.3	0.1069	0.1644	1e-12	85	0.2068	4185.6	0.0887	0.1181
TCAGTGACGTACTGCAGTACCTAGGTACATGCAGTCGTCAAGTCGACT	Klf9(Zf)/GBM-Klf9-ChIP-Seq(GSE62211)/Homer	X	X	X	0.01	28	0.0629	1787.2	0.0372	0.0257	1e-203	1323	0.1988	3155.8	0.0803	0.1185	1e-07	61	0.1484	3270.5	0.0693	0.0791
CTAGACTGCTAGTCAGTCAGTACGCTAGACTG	Maz(Zf)/HepG2-Maz-ChIP-Seq(GSE31477)/Homer	X	X	X	0.01	102	0.2292	8262.7	0.172	0.0572	1e-185	3318	0.4986	12813.2	0.326	0.1726	1e-12	178	0.4331	12675.6	0.2687	0.1644
GTACTGACATGCAGTCACTGGATCATCGGATC	SUT1?/SacCer-Promoters/Homer	X	X	X	0.01	305	0.6854	29622	0.6167	0.0687	1e-53	6185	0.9295	34222.1	0.8706	0.0589	0.0001	345	0.8394	35995.4	0.7631	0.0763
TACGATGCGACTACTGAGCTAGTCGTCATGCAACGTAGTCGCTATGCA	Pknox1(Homeobox)/ES-Prep1-ChIP-Seq(GSE63282)/Homer	X	X	X	0.01	13	0.0292	622.4	0.013	0.0162	1e-33	184	0.0277	381.8	0.0097	0.018	0.01	12	0.0292	527.3	0.0112	0.018
CGTATAGCTAGCTGCAACTGCTAGCGTACGTATCAGGACT	EHF(ETS)/LoVo-EHF-ChIP-Seq(GSE49402)/Homer	X	X		0.01	57	0.1281	4202.7	0.0875	0.0406	1e-28	709	0.1066	2718.3	0.0691	0.0375
GCATCGTAGCTAGACTCGATGACTAGTCCAGTAGTCAGTCACTGCTAGGTACCTAGCTGA	AT5G05550(Trihelix)/col-AT5G05550-DAP-Seq(GSE60143)/Homer	X	X		0.01	56	0.1258	4077	0.0849	0.0409	1e-21	1367	0.2054	6314.5	0.1606	0.0448
CGTATGACTAGCTGCAACTGACTGCGTACGTATCAGGACT	ELF3(ETS)/PDAC-ELF3-ChIP-Seq(GSE64557)/Homer	X	X		0.01	31	0.0697	2130.6	0.0444	0.0253	1e-16	332	0.0499	1199.8	0.0305	0.0194
AGTCATCGCTAGAGCTGACTCTAGAGTCAGTCGCTACAGTTCAGTCAGGATCCTGATCGAGATC	RFX(HTH)/K562-RFX3-ChIP-Seq(SRA012198)/Homer	X	X		0.01	7	0.0157	186.5	0.0039	0.0118	1e-15	108	0.0162	262.9	0.0067	0.0095
GATCGCATAGTCAGCTGATCAGCTGATCGACTGATCGACTAGTCACGTGATCAGCTGATC	GAGA-repeat/SacCer-Promoters/Homer	X	X		0.01	174	0.391	15968.2	0.3324	0.0586	1e-14	1759	0.2644	8773.1	0.2232	0.0412
GATCGATCGCTAGTCAGACTATGCTCGACGATCGATCTAG	HAT2(Homeobox)/colamp-HAT2-DAP-Seq(GSE60143)/Homer	X	X		0.01	30	0.0674	1917.7	0.0399	0.0275	1e-11	190	0.0286	649.6	0.0165	0.0121
GACTCTAGCTAGAGTCTGCAACTGACGTACGTCTAGTCAG	AMYB(HTH)/Testes-AMYB-ChIP-Seq(GSE44588)/Homer	X	X		0.01	57	0.1281	4394.6	0.0915	0.0366	1e-10	638	0.0959	2921.2	0.0743	0.0216
GACTAGTCCGTACGTAAGTCAGCTACTGGACTGTACATGC	MYB77(MYB)/col-MYB77-DAP-Seq(GSE60143)/Homer	X	X		0.01	46	0.1034	3232.2	0.0673	0.0361	1e-09	509	0.0765	2259.5	0.0575	0.019
GCTAGCATGACTGCATTCAGGTACGCTAGCATCTGAGCTATAGCGCTACTGACGATCTAG	OCT4-SOX2-TCF-NANOG(POU,Homeobox,HMG)/mES-Oct4-ChIP-Seq(GSE11431)/Homer	X	X		0.01	9	0.0202	306.9	0.0064	0.0138	1e-08	45	0.0068	97.4	0.0025	0.0043
CGTACTAGCGATGATCCTGAACTGCAGTGCATCGTAATCG	MYB33(MYB)/col-MYB33-DAP-Seq(GSE60143)/Homer	X	X		0.01	62	0.1393	4565	0.095	0.0443	1e-07	370	0.0556	1645.4	0.0419	0.0137
ACTGCATGGCTATCGAGCTAAGCTAGCTGTACAGTCTGAC	NFkB-p65-Rel(RHD)/ThioMac-LPS-Expression(GSE23622)/Homer	X			0.01	5	0.0112	131.9	0.0027	0.0085
AGTCCATGACGTACGTACTGCGTAAGTCGACTGCATGCTA	WRKY28(WRKY)/col-WRKY28-DAP-Seq(GSE60143)/Homer	X			0.01	41	0.0921	2815.4	0.0586	0.0335
ATCGGACTCGATCGTACGTACAGTGATCGATCGATCAGCT	Otx2(Homeobox)/EpiLC-Otx2-ChIP-Seq(GSE56098)/Homer	X			0.01	40	0.0899	2822.6	0.0588	0.0311
ATCGGATCGCATCGTAGTCAACGTATGCAGTC	CRX(Homeobox)/Retina-Crx-ChIP-Seq(GSE20012)/Homer	X			0.01	119	0.2674	10513.5	0.2189	0.0485
ATCGTGACATGCCTGATCAGGACTAGTCCGATTCAGTCGACATGCTAGCTAGCGTACTAGCTAGCTGACTAGCTAGATGC	ZSCAN22(Zf)/HEK293-ZSCAN22.GFP-ChIP-Seq(GSE58341)/Homer	X			0.01	10	0.0225	417.6	0.0087	0.0138
ATGCCGTACGTACGTACGTACGTAACTGACGTCGATCTGA	dof43(C2C2dof)/colamp-dof43-DAP-Seq(GSE60143)/Homer	X			0.01	56	0.1258	4144.9	0.0863	0.0395
CAGTGACTGCATTCGAAGTCACGTACGTACGTCGATGACT	OBP3(C2C2dof)/col-OBP3-DAP-Seq(GSE60143)/Homer	X			0.01	105	0.236	9063.4	0.1887	0.0473
CATGGACTGCATACTGAGCTACTGACTGCGTAGCATAGCTATCGTACG	Foxh1(Forkhead)/hESC-FOXH1-ChIP-Seq(GSE29422)/Homer	X			0.01	22	0.0494	1343.3	0.028	0.0214
CGATAGTCCATGGACTACGTCTAGCGTAGATCGACTCGATGCATGACT	WRKY43(WRKY)/colamp-WRKY43-DAP-Seq(GSE60143)/Homer	X			0.01	13	0.0292	634.4	0.0132	0.016
CTAGTAGCATGCCTAGAGTCAGTCCTAGGACTGACTGCTA	CRF10(AP2EREBP)/col100-CRF10-DAP-Seq(GSE60143)/Homer	X			0.01	72	0.1618	5826.4	0.1213	0.0405
CTGAACTGACTGAGTCAGTCAGCTCTAGTACG	ZFX(Zf)/mES-Zfx-ChIP-Seq(GSE11431)/Homer	X			0.01	81	0.182	6494.4	0.1352	0.0468
CTGAATGCGCTAGCATATGCCGTATCGACTGACTAGTCAGTACGGTCA	Tcf4(HMG)/Hct116-Tcf4-ChIP-Seq(SRA012054)/Homer	X			0.01	20	0.0449	1163.2	0.0242	0.0207
CTGATCAGGTACGCTAACTGTGACGCATCATG	SCL(bHLH)/HPC7-Scl-ChIP-Seq(GSE13511)/Homer	X		X	0.01	188	0.4225	17454.3	0.3634	0.0591							0.0001	175	0.4258	15782.1	0.3346	0.0912
GACTTCGACGTACGTACGTACGTACGTACTAGAGCTCGTA	dof45(C2C2dof)/col-dof45-DAP-Seq(GSE60143)/Homer	X			0.01	93	0.209	7861.1	0.1637	0.0453
GATCGCATTCGAAGTCACGTACGTACGTCGATACGTATCG	AT1G47655(C2C2dof)/colamp-AT1G47655-DAP-Seq(GSE60143)/Homer	X			0.01	126	0.2831	11018.1	0.2294	0.0537
GCTACGTACGATCAGTACTGCGATGTACACTGATCGGACTCATGCTAGGCATCAGTCATG	DEAR5(AP2EREBP)/col-DEAR5-DAP-Seq(GSE60143)/Homer	X			0.01	6	0.0135	193.9	0.004	0.0095
GCTACGTAGCTACGTACTGAACTGACGTGTACCGTACTGAGTACACTG	WRKY22(WRKY)/colamp-WRKY22-DAP-Seq(GSE60143)/Homer	X			0.01	21	0.0472	1199.4	0.025	0.0222
GTACACTGATGCTGACCTAGGACTGTACCGTAGCATGCAT	ERF8(AP2EREBP)/colamp-ERF8-DAP-Seq(GSE60143)/Homer	X			0.01	58	0.1303	4290.6	0.0893	0.041
TACGATCGTAGCGATCACTGACGTAGTCACGTCTAGATCG	Smad4(MAD)/ESC-SMAD4-ChIP-Seq(GSE29422)/Homer	X			0.01	71	0.1596	5704.9	0.1188	0.0408
TACGTCGACGTACGTACGTACTGAACTGACGTCGTATCGA	AT2G28810(C2C2dof)/colamp-AT2G28810-DAP-Seq(GSE60143)/Homer	X			0.01	84	0.1888	6796.7	0.1415	0.0473
TAGCTAGCGCATCATGACTGGCTACGTAACGTACTGGATC	TEAD4(TEA)/Tropoblast-Tead4-ChIP-Seq(GSE37350)/Homer	X			0.01	34	0.0764	2361.2	0.0492	0.0272
TCAGAGCTGTCACGTAACGTATGCCGTAACGTACGTCTGA	PHV(HB)/col-PHV-DAP-Seq(GSE60143)/Homer	X			0.01	17	0.0382	873.3	0.0182	0.02
TCAGGACTACGTCGTAACTGACTGACTGAGTCCGTAGTCA	TBP3(MYBrelated)/col-TBP3-DAP-Seq(GSE60143)/Homer	X			0.01	34	0.0764	2294.5	0.0478	0.0286
TCGACTGACGTACGTACGTACGTAACTGACGTCGATCTGA	BBX31(Orphan)/col-BBX31-DAP-Seq(GSE60143)/Homer	X			0.01	59	0.1326	4457	0.0928	0.0398
TCAGCGTAAGTCAGCTCGTAAGTCCTGACGTAAGTCGCATAGTCAGTCAGTCCTGAACTGTGCATCGACATGATCGGATC	Ronin(THAP)/ES-Thap11-ChIP-Seq(GSE51522)/Homer		X								1e-116	180	0.0271	100	0.0025	0.0246
TCGACGTAAGTCAGCTCGTAAGTCTCGAGCTAGACTCGATAGTCAGTCAGTCCTGATCAGTGCATCGACAGTATCGAGTC	GFY-Staf(?,Zf)/Promoter/Homer		X								1e-114	198	0.0298	131.5	0.0033	0.0265
TGCATAGCGACTTGCATGACTGCACGTAAGCTAGCTAGTCAGTCGTAC	GFY(?)/Promoter/Homer		X								1e-97	187	0.0281	143.7	0.0037	0.0244
CATGTGCAGACTCATGCGTAAGTCTCAGGCATTGACCGTA	bZIP50(bZIP)/colamp-bZIP50-DAP-Seq(GSE60143)/Homer		X								1e-96	674	0.1013	1623.4	0.0413	0.06
GACTATCGCTGAAGTCTCAGGACTGTACCTGAAGCTGTAC	TGA6(bZIP)/colamp-TGA6-DAP-Seq(GSE60143)/Homer		X								1e-95	488	0.0733	966.8	0.0246	0.0487
TCGAACGTACTGCGTAAGTCCTAGAGCTTGAC	TGA10(bZIP)/colamp-TGA10-DAP-Seq(GSE60143)/Homer		X								1e-88	437	0.0657	847.7	0.0216	0.0441
ATGCATCGTACGAGCTATCGCTGAAGTCCTAGAGCTATGCCTGAATGC	CRE(bZIP)/Promoter/Homer		X	X							1e-85	377	0.0567	674.8	0.0172	0.0395	0.001	15	0.0365	638.3	0.0135	0.023
CTAGGTACAGTCTGCAAGTCCTGAAGTCAGTCAGTCGCTA	Klf4(Zf)/mES-Klf4-ChIP-Seq(GSE11431)/Homer		X	X							1e-81	746	0.1121	2050.8	0.0522	0.0599	1e-05	42	0.1022	2267.2	0.0481	0.0541
GACTACTGCGTAAGTCTCAGGCATGTACCGTAACGTGATC	TGA1(bZIP)/colamp-TGA1-DAP-Seq(GSE60143)/Homer		X	X							1e-77	343	0.0515	613.1	0.0156	0.0359	0.01	15	0.0365	721.1	0.0153	0.0212
CTGACTAGGCATATGCCGTAAGTCACTGACGTTACGCTGA	HY5(bZIP)/colamp-HY5-DAP-Seq(GSE60143)/Homer		X								1e-76	665	0.0999	1783.5	0.0454	0.0545
ATCGAGCTACTGAGTCACTGAGTCCGTAACGTACTGAGTCACTGAGTC	NRF(NRF)/Promoter/Homer		X	X							1e-75	533	0.0801	1287.7	0.0328	0.0473	0.01	20	0.0487	1108	0.0235	0.0252
TCAGCATGCATGACTGACTGAGCTACTGACGTACTGCAGTATGCAGTC	KLF10(Zf)/HEK293-KLF10.GFP-ChIP-Seq(GSE58341)/Homer		X	X							1e-75	854	0.1283	2571.2	0.0654	0.0629	0.001	41	0.0998	2707.3	0.0574	0.0424
CGTAGATCCTAGACGTGTACCTGAAGCTGATCGCTAGACT	TGA2(bZIP)/colamp-TGA2-DAP-Seq(GSE60143)/Homer		X								1e-74	486	0.073	1121.1	0.0285	0.0445
TCAGGCATACTGCGTAAGTCCTAGGCATTGAC	TGA9(bZIP)/colamp-TGA9-DAP-Seq(GSE60143)/Homer		X								1e-73	590	0.0887	1517.6	0.0386	0.0501
ATGCAGCTTCAGTGACTCAGATGCTGCAACGTATCGGATCACTGAGTC	NRF1(NRF)/MCF7-NRF1-ChIP-Seq(Unpublished)/Homer		X								1e-69	606	0.0911	1627.7	0.0414	0.0497
TCGAGACTATCGCGTAAGTCCTAGGCATGTACCTGAACGTGATCGCTA	TGA4(bZIP)/colamp-TGA4-DAP-Seq(GSE60143)/Homer		X								1e-63	252	0.0379	416.3	0.0106	0.0273
AGTCCTGAAGTCCGATCAGTGATCATGCACTGATCGGACT	Fli1(ETS)/CD8-FLI-ChIP-Seq(GSE20898)/Homer		X	X							1e-59	1069	0.1607	3791.9	0.0965	0.0642	0.01	49	0.1192	3800.4	0.0806	0.0386
TGCATCGATAGCGTACTCAGCTAGGTCAGCTATCAGGACT	ETS(ETS)/Promoter/Homer		X	X							1e-58	499	0.075	1321.4	0.0336	0.0414	0.0001	24	0.0584	1123.8	0.0238	0.0346
GATCTCGAAGTCCGATCGATAGTCATGCACTGATCGGACT	Elk1(ETS)/Hela-Elk1-ChIP-Seq(GSE31477)/Homer		X	X							1e-57	841	0.1264	2777.7	0.0707	0.0557	0.01	33	0.0803	2434.7	0.0516	0.0287
CGTACGATCTAGTGCAAGCTACTGCGTAAGTCCTAGCGATTGACCTGAACGTGTACGCTA	TGA5(bZIP)/col-TGA5-DAP-Seq(GSE60143)/Homer		X	X							1e-54	135	0.0203	143.1	0.0036	0.0167	0.01	5	0.0122	134.1	0.0028	0.0094
GATCCTGAAGTCCGATCGATGATCAGTCACTGATCGAGCT	Elk4(ETS)/Hela-Elk4-ChIP-Seq(GSE31477)/Homer		X								1e-52	827	0.1243	2793.3	0.0711	0.0532
CTAGTACGGATCGTACGCTAAGCTAGCTGTCATCGATAGC	Nanog(Homeobox)/mES-Nanog-ChIP-Seq(GSE11724)/Homer		X	X							1e-48	1642	0.2468	6886.5	0.1752	0.0716	0.01	112	0.2725	10199.5	0.2162	0.0563
ATGCTCAGTCGAGCATACTGCGTAAGTCTCAGGACTTGACCGTAAGCT	Atf2(bZIP)/3T3L1-Atf2-ChIP-Seq(GSE56872)/Homer		X								1e-47	260	0.0391	539.6	0.0137	0.0254
CAGTATCGCTGAAGTCTCAGCAGTTAGCCTGAATGCTACG	FEA4(bZIP)/Corn-FEA4-ChIP-Seq(GSE61954)/Homer		X								1e-47	710	0.1067	2354.7	0.0599	0.0468
ATGCATGCATCGTACGAGCTAGTCGCTAAGTCTCAGGACTACTGTCGA	E-box(bHLH)/Promoter/Homer		X	X							1e-46	186	0.028	309.6	0.0079	0.0201	0.001	9	0.0219	270.2	0.0057	0.0162
CTGATGCATAGCTGACTACGTCAGCTGAGCTATCAGGACT	ELF1(ETS)/Jurkat-ELF1-ChIP-Seq(SRA014231)/Homer		X	X							1e-46	757	0.1138	2580.4	0.0656	0.0482	0.001	35	0.0852	2280.3	0.0483	0.0369
TCGACTGATAGCTGACTCAGTCAGCGTACGTATCAGAGCT	ETV1(ETS)/GIST48-ETV1-ChIP-Seq(GSE22441)/Homer		X	X							1e-46	1070	0.1608	4049.8	0.103	0.0578	0.01	58	0.1411	4417.9	0.0937	0.0474
TCGATCGATAGCGTACTCAGTACGCGTACGTATCAGAGCT	GABPA(ETS)/Jurkat-GABPa-ChIP-Seq(GSE17954)/Homer		X								1e-45	790	0.1187	2750.2	0.07	0.0487
CGTACGTACGTACGTACGTACGTACGTACGTACGTACGTA	SeqBias: polyA-repeat		X	X							1e-42	5136	0.7719	27393.1	0.6968	0.0751	0.0001	341	0.8297	35250.6	0.7473	0.0824
TACGTCGAGACTACTGCTGAAGTCTCAGGACTTGACCTGA	Atf1(bZIP)/K562-ATF1-ChIP-Seq(GSE31477)/Homer		X								1e-42	446	0.067	1297	0.033	0.034
TCAGAGCTATGCCGTAAGTCTCAGACGTATCGTCGAAGTCGATCTGAC	TFE3(bHLH)/MEF-TFE3-ChIP-Seq(GSE75757)/Homer		X								1e-42	144	0.0216	207.2	0.0053	0.0163
TAGCCTAGTCGAGACTACTGCTGAAGTCTCAGGCATTGACCTGAAGCT	Atf7(bZIP)/3T3L1-Atf7-ChIP-Seq(GSE56872)/Homer		X								1e-41	350	0.0526	920.1	0.0234	0.0292
TCGAACGTACTGCTGAAGTCTCAGAGCTGTACCGTAAGCTGATCTCGA	JunD(bZIP)/K562-JunD-ChIP-Seq/Homer		X								1e-41	119	0.0179	149.6	0.0038	0.0141
GCTACGATCTAGTCGAAGCTACTGCGTAAGTCCTAGACGTGTACCTGAAGCTGATCCGTA	TGA3(bZIP)/colamp-TGA3-DAP-Seq(GSE60143)/Homer		X	X							1e-40	99	0.0149	103.9	0.0026	0.0123	0.01	4	0.0097	89.9	0.0019	0.0078
TCGATAGCTGCAACTGACTGCGTACGTACTAGGACTTACG	ETS1(ETS)/Jurkat-ETS1-ChIP-Seq(GSE17954)/Homer		X	X							1e-37	776	0.1166	2851.4	0.0725	0.0441	0.01	43	0.1046	3097.7	0.0657	0.0389
CTAGCTGACTAGCTGACTAGCTGACTAGCTGACTAGCTGA	SeqBias: GA-repeat		X								1e-36	4029	0.6055	20740.9	0.5276	0.0779
GACTCTAGCTAGCTAGACTGTCGACTGACTAGCTAGCTAGGTACGTCA	ZNF467(Zf)/HEK293-ZNF467.GFP-ChIP-Seq(GSE58341)/Homer		X								1e-36	1212	0.1821	5004.5	0.1273	0.0548
AGCTCTGAAGTCACTGAGCTTGCACGTAAGTC	ATAF1(NAC)/col-ATAF1-DAP-Seq(GSE60143)/Homer		X								1e-34	1614	0.2426	7146.9	0.1818	0.0608
CGTACGTAAGCTGACTTGCAGTCAACGTAGCTCTGATCAG	Lhx3(Homeobox)/Neuron-Lhx3-ChIP-Seq(GSE31456)/Homer		X	X							1e-34	480	0.0721	1555.9	0.0396	0.0325	0.01	41	0.0998	2905.7	0.0616	0.0382
ACGTTAGCTGCAGATCTCAGACGTACTGTGCAGATCGATC	Cbf1(bHLH)/Yeast-Cbf1-ChIP-Seq(GSE29506)/Homer		X								1e-33	251	0.0377	625.5	0.0159	0.0218
TAGCGTACAGTCGTACCGATAGTCAGTCAGTCAGTCAGTCCGTAGATC	Zfp281(Zf)/ES-Zfp281-ChIP-Seq(GSE81042)/Homer		X	X							1e-32	436	0.0655	1381.2	0.0351	0.0304	0.01	24	0.0584	1468.9	0.0311	0.0273
ACGTCGTATCAGACGTATGCCTGATGACCTAGCAGTTACGGTCAAGTC	BIM3(bHLH)/col-BIM3-DAP-Seq(GSE60143)/Homer		X								1e-31	162	0.0243	322.3	0.0082	0.0161
TAGCAGTCTGACAGTCCTAGATCGAGTCCATGTGACAGTCGTACAGTCAGTCGCATCTAGATCGGCATACTGATCGGATC	BORIS(Zf)/K562-CTCFL-ChIP-Seq(GSE32465)/Homer		X	X							1e-31	488	0.0733	1633.3	0.0415	0.0318	0.0001	32	0.0779	1570.3	0.0333	0.0446
ATGCAGTCCTGAAGTCCGATACGTAGTCAGTCACGTATCGGACTACGT	Etv2(ETS)/ES-ER71-ChIP-Seq(GSE59402)/Homer(0.967)		X	X							1e-30	599	0.09	2153.9	0.0548	0.0352	0.01	37	0.09	2461.1	0.0522	0.0378
ATGCATCGATGCATCGATGCATCGATGCATCGATGCATCG	SeqBias: CG-repeat		X								1e-30	4392	0.6601	23219.5	0.5907	0.0694
TGCACTGAAGTCGTCAACTGACTGCGTACGTACTGAAGCT	EWS:FLI1-fusion(ETS)/SK_N_MC-EWS:FLI1-ChIP-Seq(SRA014231)/Homer		X	X							1e-30	411	0.0618	1304.2	0.0332	0.0286	0.0001	30	0.073	1548.6	0.0328	0.0402
CATGAGCTACTGACGTAGTCCGTAACTGCGTACTGACGTAGCTACGTACGATGCATCGTA	AtGRF6(GRF)/col-AtGRF6-DAP-Seq(GSE60143)/Homer		X								1e-29	556	0.0836	1982.9	0.0504	0.0332
ATGCGATCGACTAGCTCGATCGATGTCACGATTCGAATCGTAGCTAGC	TATA-Box(TBP)/Promoter/Homer		X	X							1e-28	447	0.0672	1494.7	0.038	0.0292	0.01	39	0.0949	2714.1	0.0575	0.0374
TCAGAGCTATGCCGTAAGCTTCAGCAGTACTGCTGAAGTC	MITF(bHLH)/MastCells-MITF-ChIP-Seq(GSE48085)/Homer		X								1e-28	511	0.0768	1782.1	0.0453	0.0315
TCGATAGCGTCAACTGACTGCGTACGTACTAGAGCTTCAG	ERG(ETS)/VCaP-ERG-ChIP-Seq(GSE14097)/Homer		X								1e-28	949	0.1426	3905.5	0.0994	0.0432
TCGAGCATACTGCTGAAGTCTCAGGACTGTACCGTAAGCTAGTCGATC	c-Jun-CRE(bZIP)/K562-cJun-ChIP-Seq(GSE31477)/Homer		X								1e-27	198	0.0298	483.1	0.0123	0.0175
TCGATCAGCGATCAGTTCGAAGTCACTGACGTTCAGGCAT	NAM(NAC)/col-NAM-DAP-Seq(GSE60143)/Homer		X								1e-27	657	0.0987	2499.5	0.0636	0.0351
TAGCCGTACTGATACGCGTAACGTACTGACTGAGTCTACGCTAGGTAC	YY1(Zf)/Promoter/Homer		X								1e-26	151	0.0227	320	0.0081	0.0146
AGCTGCATACTGACGTAGTCACGTCTAGTACG	Smad3(MAD)/NPC-Smad3-ChIP-Seq(GSE36673)/Homer		X								1e-25	1417	0.213	6441.9	0.1639	0.0491
CGATACTGAGCTTGACCTGAAGTCCTAGGCATATCGCGTA	SPCH(bHLH)/Seedling-SPCH-ChIP-Seq(GSE57497)/Homer		X	X							1e-24	618	0.0929	2374.9	0.0604	0.0325	0.01	37	0.09	2664.7	0.0565	0.0335
CTAGCGATCTAGCGATCTGAGCATTCAGCAGTAGTCCGTAAGTCACTGACGTACTGGTCA	BIM1(bHLH)/colamp-BIM1-DAP-Seq(GSE60143)/Homer		X								1e-24	136	0.0204	285.2	0.0073	0.0131
TACGTCAGAGCTATGCCGTAAGTCTCAGACGTACTGTCGA	USF1(bHLH)/GM12878-Usf1-ChIP-Seq(GSE32465)/Homer		X								1e-23	362	0.0544	1207.6	0.0307	0.0237
TCAGACGTAGTCTCGAAGTCTCAGGCATCTAGCTAGAGCT	Usf2(bHLH)/C2C12-Usf2-ChIP-Seq(GSE36030)/Homer		X								1e-23	277	0.0416	847.1	0.0215	0.0201
ATCGATCGATCGATCGATCGATCGATCGATCGATCGATCG	SeqBias: CG bias		X								1e-22	6428	0.966	36917.6	0.9391	0.0269
CAGTTCAGGATCACTGACGTCTAGACTGACTGGACTCTAG	Egr1(Zf)/K562-Egr1-ChIP-Seq(GSE32465)/Homer		X								1e-22	1239	0.1862	5586.5	0.1421	0.0441
CTAGGCATGATCCGTAAGTCTCAGGACTCTAG	CLOCK(bHLH)/Liver-Clock-ChIP-Seq(GSE39860)/Homer		X								1e-22	377	0.0567	1291	0.0328	0.0239
TGCAGCATAGCTGCATAGTCAGTCAGTCCTGAACTGTCGATCGACAGTATCGAGTCGATC	ZNF143|STAF(Zf)/CUTLL-ZNF143-ChIP-Seq(GSE29600)/Homer		X								1e-22	281	0.0422	877.6	0.0223	0.0199
GCATCGTACGATACTGAGTCGCTACTGACGTACAGTACTGCGTATCAG	Oct6(POU,Homeobox)/NPC-Pou3f1-ChIP-Seq(GSE35496)/Homer		X	X							1e-21	133	0.02	302.8	0.0077	0.0123	0.01	12	0.0292	574.7	0.0122	0.017
CGTACGATCGTACGATCATGACTGCGATAGTCATCGTCAGGACTACTG	At1g36060(AP2EREBP)/colamp-At1g36060-DAP-Seq(GSE60143)/Homer		X								1e-20	580	0.0872	2302	0.0586	0.0286
CTAGATGCATGCCGATACTGGACTATGCGCTATGACAGCTTAGCGCTA	PBX1(Homeobox)/MCF7-PBX1-ChIP-Seq(GSE28007)/Homer		X	X							1e-20	76	0.0114	121.4	0.0031	0.0083	0.001	7	0.017	171	0.0036	0.0134
GACTCGTAACGTACTGAGTCCGTACTGACGTACAGTACGTGTCATCAG	Brn1(POU,Homeobox)/NPC-Brn1-ChIP-Seq(GSE35496)/Homer		X								1e-20	110	0.0165	227.7	0.0058	0.0107
CGTACTGAGTCAACGTAGTCCGTAAGTCACTGACGTACTGTGCAAGCT	bHLH74(bHLH)/col-bHLH74-DAP-Seq(GSE60143)/Homer		X								1e-18	256	0.0385	834	0.0212	0.0173
GATCGTACCTGAAGTCAGTCACTGGCTAGTACGTCAGCATGCATCGAT	DEAR2(AP2EREBP)/colamp-DEAR2-DAP-Seq(GSE60143)/Homer		X								1e-18	902	0.1356	3973.2	0.1011	0.0345
TACGTACGGTACATCGACTGTACGTCGACTGATCGAATCG	E2F6(E2F)/Hela-E2F6-ChIP-Seq(GSE31477)/Homer		X								1e-18	1134	0.1704	5196.7	0.1322	0.0382
ACTGGTACAGTCCTGAATGCACTGAGCTTACG	E-box/Arabidopsis-Promoters/Homer		X								1e-17	370	0.0556	1352.2	0.0344	0.0212
CATGGTACCGTAAGTCCTAGACGTACTGGTACAGTCAGCT	bHLHE40(bHLH)/HepG2-BHLHE40-ChIP-Seq(GSE31477)/Homer		X								1e-17	265	0.0398	890	0.0226	0.0172
ACGTTACGGATCACTGACGTCTAGACTGACTGGATCCTAGCATGCTAG	Egr2(Zf)/Thymocytes-Egr2-ChIP-Seq(GSE34254)/Homer		X								1e-16	466	0.07	1847.2	0.047	0.023
ACTGACGTCATGATCGATCGTGACACTGATCGATCGTGCACTGACGTA	E2F3(E2F)/MEF-E2F3-ChIP-Seq(GSE71376)/Homer		X								1e-16	1234	0.1855	5808.4	0.1478	0.0377
AGCTCGTACGTAAGTCCTAGCTAGGTACGACT	MYB101(MYB)/colamp-MYB101-DAP-Seq(GSE60143)/Homer		X								1e-16	669	0.1005	2839.5	0.0722	0.0283
CTAGTCAGCTGATCAGTGCAACTGTCGATCAG	Trl(Zf)/S2-GAGAfactor-ChIP-Seq(GSE40646)/Homer		X								1e-16	2214	0.3327	11207.1	0.2851	0.0476
GCTAAGTCTACGTGCAATCGTCAGGCTATCGATCAGAGCT	ELF5(ETS)/T47D-ELF5-ChIP-Seq(GSE30407)/Homer		X								1e-16	411	0.0618	1570.8	0.04	0.0218
TACGTACGGTACATCGTACGTACGGTCACTGACGTAGACT	E2F4(E2F)/K562-E2F4-ChIP-Seq(GSE31477)/Homer		X								1e-16	889	0.1336	3989.9	0.1015	0.0321
CGTAACGTAGCTCGATCTAGGTACCGTAAGCTCGTAGCTA	Oct4(POU,Homeobox)/mES-Oct4-ChIP-Seq(GSE11431)/Homer		X	X							1e-15	126	0.0189	326.2	0.0083	0.0106	0.01	13	0.0316	586.2	0.0124	0.0192
CTAGCTAGAGTCTCAGACTGACGTACGTCTGA	MYB(HTH)/ERMYB-Myb-ChIPSeq(GSE22095)/Homer		X	X							1e-15	823	0.1237	3688.9	0.0938	0.0299	0.01	55	0.1338	4392.4	0.0931	0.0407
GCTACTGACTAGCGATCAGTTCGAAGTCACTGACGTTCAGGCATGCTA	NAP(NAC)/col-NAP-DAP-Seq(GSE60143)/Homer		X								1e-15	435	0.0654	1714.5	0.0436	0.0218
TCGAGACTAGCTTGACAGCTGTACTCAGGATCATCGTGCAACTGCTGA	GFX(?)/Promoter/Homer		X								1e-15	43	0.0065	53.7	0.0014	0.0051
CATGCTAGAGTCACTGACTGGTACCATGTACG	AT1G28160(AP2EREBP)/colamp-AT1G28160-DAP-Seq(GSE60143)/Homer		X								1e-14	3565	0.5358	19186.3	0.4881	0.0477
CGTACGTACGATACTGCAGTAGTCACTGACTGAGCTACTG	DREB19(AP2EREBP)/colamp-DREB19-DAP-Seq(GSE60143)/Homer		X								1e-14	413	0.0621	1647	0.0419	0.0202
CTAGCATGTGCAACGTAGTCCGTACATGTCAGACGTACGTGCTAAGTC	Six1(Homeobox)/Myoblast-Six1-ChIP-Chip(GSE20150)/Homer		X								1e-14	102	0.0153	247.5	0.0063	0.009
TGACCTGAAGTCAGTCACTGGATCGACTGCAT	At5g18450(AP2EREBP)/col-At5g18450-DAP-Seq(GSE60143)/Homer		X								1e-14	2450	0.3682	12695.2	0.3229	0.0453
TGCAAGCTCTGAATCGGACTCTAGGTACGATCGTCAAGTCGTACGACTCTAGATCGGCATCATGCATGGATCGTACCTGA	CTCF(Zf)/CD4+-CTCF-ChIP-Seq(Barski_et_al.)/Homer		X								1e-14	182	0.0274	565.1	0.0144	0.013
CATGGTACGATCACTGACGTAGCTCGTACGTA	AT3G10030(Trihelix)/colamp-AT3G10030-DAP-Seq(GSE60143)/Homer		X								1e-13	201	0.0302	663.9	0.0169	0.0133
CGTACGATCAGTCATGCGATGTACCATGACTGGACTCATG	CEJ1(AP2EREBP)/col-CEJ1-DAP-Seq(GSE60143)/Homer		X								1e-13	724	0.1088	3219.3	0.0819	0.0269
CTAGAGCTGACTCATGAGTCAGTCGTCACAGTCTAGTCAGGTACCTGATCGAGATCTGAC	Rfx2(HTH)/LoVo-RFX2-ChIP-Seq(GSE49402)/Homer		X								1e-13	104	0.0156	261.2	0.0066	0.009
CGATCTGACTAGGTACACTGAGTCCTAGAGTC	DPL-1(E2F)/cElegans-Adult-ChIP-Seq(modEncode)/Homer		X								1e-12	1667	0.2505	8394.1	0.2135	0.037
CGTACAGTCATGGTACAGTCCGTAATGCATCGACGTTACGCGTAGATCGTACCGTACGTA	AREB3(bZIP)/col-AREB3-DAP-Seq(GSE60143)/Homer		X								1e-12	188	0.0283	621.9	0.0158	0.0125
CGTACGTACTGACAGTTAGCCGTAGATCCTAGGCATCATGGTACGACT	BIM2(bHLH)/col-BIM2-DAP-Seq(GSE60143)/Homer		X								1e-12	390	0.0586	1564.5	0.0398	0.0188
CGTAGCATCGTACGTAGCATACTGCGATAGTCACTGACTGGACTCTAG	AT1G71450(AP2EREBP)/col-AT1G71450-DAP-Seq(GSE60143)/Homer		X								1e-12	1906	0.2864	9746.1	0.2479	0.0385
GACTCATGGTACAGTCCGTAAGTCACTGACGTTACGCGTAAGTCGATC	bZIP28(bZIP)/col-bZIP28-DAP-Seq(GSE60143)/Homer		X								1e-12	176	0.0265	580.1	0.0148	0.0117
GACTTCAGGCATAGTCGCTAGATCCTGAACGTAGTCGTCA	Replumless(BLH)/Arabidopsis-RPL.GFP-ChIP-Seq(GSE78727)/Homer		X	X							1e-12	348	0.0523	1382.4	0.0352	0.0171	0.001	35	0.0852	2082.4	0.0441	0.0411
GCATGCATGACTGCATTAGCATGCGATCCATGAGTCAGTC	DEL2(E2FDP)/col-DEL2-DAP-Seq(GSE60143)/Homer		X								1e-12	397	0.0597	1610.6	0.041	0.0187
ATGCTCGATACGACGTATGCAGTCACGTAGTCAGTCGATC	Znf263(Zf)/K562-Znf263-ChIP-Seq(GSE31477)/Homer		X								1e-11	1629	0.2448	8223.4	0.2092	0.0356
GCATACTGGTACAGTCCGTAATGCACTGACGTTACGCAGT	bZIP68(bZIP)/col-bZIP68-DAP-Seq(GSE60143)/Homer		X								1e-11	207	0.0311	733.5	0.0187	0.0124
GTCATACGCGATCTAGCTGAGCATCGATCATGTCGAAGTCCGTAAGTCACTGACGTACTG	bHLH34(bHLH)/colamp-bHLH34-DAP-Seq(GSE60143)/Homer		X								1e-11	184	0.0277	624.9	0.0159	0.0118
TAGCACGTCGTAACGTCGTACGTACGTACGTACTAGTAGCTAGCTACG	TATA-box/Drosophila-Promoters/Homer		X	X							1e-11	37	0.0056	56.9	0.0014	0.0042	0.001	6	0.0146	118.4	0.0025	0.0121
TGACCGATACTGACTGACTGGACTACTGACGTACTGACTGGATCGATC	EKLF(Zf)/Erythrocyte-Klf1-ChIP-Seq(GSE20478)/Homer		X								1e-11	172	0.0258	581.2	0.0148	0.011
AGCTAGTCCGTAAGTCCTAGACGTACTGTCAGCGATCATG	PIF5ox(bHLH)/Arabidopsis-PIF5ox-ChIP-Seq(GSE35062)/Homer		X								1e-10	441	0.0663	1902.3	0.0484	0.0179
AGCTGTCATGCAAGTCACGTACGTACGTCGATGACTTACG	AT3G12130(C3H)/colamp-AT3G12130-DAP-Seq(GSE60143)/Homer		X								1e-10	643	0.0966	2933.4	0.0746	0.022
AGTCCGATCTGACGTAACGTCAGTTCAGTGAC	Isl1(Homeobox)/Neuron-Isl1-ChIP-Seq(GSE31456)/Homer		X								1e-10	524	0.0787	2321.7	0.0591	0.0196
AGTCGCATCGTACGTAGTACACGTACTGGATCGATCTCGA	BMYB(HTH)/Hela-BMYB-ChIP-Seq(GSE27030)/Homer		X								1e-10	580	0.0872	2616.4	0.0666	0.0206
CAGTCATGGTACAGTCCGTAAGTCACTGACGTTACGCTGA	bZIP16(bZIP)/colamp-bZIP16-DAP-Seq(GSE60143)/Homer		X								1e-10	180	0.0271	626.8	0.0159	0.0112
CGTAGCTACGATCATGGTACAGTCCGTAAGTCACTGACGTTAGCCGTAAGTCGTACCGTA	GBF6(bZIP)/colamp-GBF6-DAP-Seq(GSE60143)/Homer		X								1e-10	129	0.0194	404.9	0.0103	0.0091
CTGAATGCCGTAACGTAGTCAGTCACGTACTGATCGGCAT	SPDEF(ETS)/VCaP-SPDEF-ChIP-Seq(SRA014231)/Homer		X								1e-10	514	0.0772	2277.6	0.0579	0.0193
CTGACGTAAGTCTAGCACTGACGTGCATGCTA	MYB65(MYB)/colamp-MYB65-DAP-Seq(GSE60143)/Homer		X								1e-10	293	0.044	1150.9	0.0293	0.0147
GATCGCTAAGTCACGTACTGCGTAAGTCCGTAGCTACGATCAGTGCATGCTACGTAGCAT	GRF9(GRF)/colamp-GRF9-DAP-Seq(GSE60143)/Homer		X								1e-10	300	0.0451	1189	0.0302	0.0149
GTACCTGAAGTCAGTCACTGGTCAGATCGCAT	At1g75490(AP2EREBP)/colamp-At1g75490-DAP-Seq(GSE60143)/Homer		X								1e-10	1662	0.2498	8527.3	0.2169	0.0329
ATGCGTACACTGAGTCAGTCACTGGATCGTCACGTACGATGCATCGAT	RRTF1(AP2EREBP)/colamp-RRTF1-DAP-Seq(GSE60143)/Homer		X								1e-09	289	0.0434	1177.1	0.0299	0.0135
CGATCATGATCGGCATATGCCTGAAGTCCTAGGCATCTAGCATGGTACGCTACGTAGCTA	GBF5(bZIP)/colamp-GBF5-DAP-Seq(GSE60143)/Homer		X								1e-09	153	0.023	529.8	0.0135	0.0095
CGTACGATCATGATCGGACTATGCCGTAAGTCCTAGCGATCTAGCATGGTACCGTACGAT	bZIP3(bZIP)/col-bZIP3-DAP-Seq(GSE60143)/Homer		X								1e-09	222	0.0334	832.3	0.0212	0.0122
CGTATACGTCGAACTGACTGCGTACGTATACGAGCTTACG	PU.1(ETS)/ThioMac-PU.1-ChIP-Seq(GSE21512)/Homer		X								1e-09	236	0.0355	919.9	0.0234	0.0121
CTAGCGTAGTCACGTAAGTCGATCAGCTCTAGCGTAACGTGTCAGATC	Six2(Homeobox)/NephronProgenitor-Six2-ChIP-Seq(GSE39837)/Homer		X								1e-09	296	0.0445	1196.3	0.0304	0.0141
GCATCATGTCAGGACTATGCCGTAAGTCACTGACGTACTGACTGGTACGCTACGTAGCTA	bZIP53(bZIP)/colamp-bZIP53-DAP-Seq(GSE60143)/Homer		X								1e-09	186	0.028	673.2	0.0171	0.0109
GCTATGACTGCAATGCACTGAGTCACGTAGTCAGTCGCAT	MYB88(MYB)/col-MYB88-DAP-Seq(GSE60143)/Homer		X								1e-09	2803	0.4213	15084.5	0.3837	0.0376
ATCGTGCAGATCCTAGACGTATCGCGTAAGTCTCAGACTGTCAGGCTA	Knotted(Homeobox)/Corn-KN1-ChIP-Seq(GSE39161)/Homer		X								1e-08	854	0.1283	4154.7	0.1057	0.0226
CATGCTAGAGCTGACTCATGAGTCGATCGCTACGATCTAGTCAGGTACCTGATCGA	X-box(HTH)/NPC-H3K4me1-ChIP-Seq(GSE16256)/Homer		X								1e-08	74	0.0111	199.2	0.0051	0.006
CGTAATCGATGCTAGCCTGAAGTCTCAGGCATTCAGTCAG	PIF4(bHLH)/Seedling-PIF4-ChIP-Seq(GSE35315)/Homer		X								1e-08	486	0.073	2212.6	0.0563	0.0167
CGTACGTACGTACGTACGTAACTGACTGAGTC	dof42(C2C2dof)/col-dof42-DAP-Seq(GSE60143)/Homer		X								1e-08	193	0.029	733.3	0.0187	0.0103
CGTAGACTGACTCTGACTGACGTAGTACATGCTACGCTAG	Unknown3/Arabidopsis-Promoters/Homer		X								1e-08	84	0.0126	242.9	0.0062	0.0064
GACTGATCCTGAAGTCAGTCACTGCGTAAGTCGTACGCTAGCATCGAT	At1g19210(AP2EREBP)/colamp-At1g19210-DAP-Seq(GSE60143)/Homer		X								1e-08	1069	0.1607	5356.3	0.1363	0.0244
GCATACGTATGCCTGACTAGGACTGATCACTG	Initiator/Drosophila-Promoters/Homer		X								1e-08	672	0.101	3173.7	0.0807	0.0203
GCATTCGAACGTCGTAACTGACTGAGCTGCATGACTGCTA	SRS7(SRS)/colamp-SRS7-DAP-Seq(GSE60143)/Homer		X								1e-08	1423	0.2139	7313.7	0.1861	0.0278
GCTAACGTCTAGGTCACGTAACGTCGTACGATCAGTAGTCCGTAACGTCTAGCTGAATCG	OCT:OCT(POU,Homeobox)/NPC-Brn1-ChIP-Seq(GSE35496)/Homer		X								1e-08	10	0.0015	4.5	0.0001	0.0014
AGCTAGCTTAGCATCGAGTCACTGATGCATCGTCGACTGATCGACTGA	E2F(E2F)/Hela-CellCycle-Expression/Homer		X								1e-07	89	0.0134	280.3	0.0071	0.0063
AGCTGCTATGCAAGTCACGTACGTACGTCGATAGCTTCAG	dof24(C2C2dof)/col-dof24-DAP-Seq(GSE60143)/Homer		X								1e-07	517	0.0777	2425.5	0.0617	0.016
AGCTGTCACGTAACGTACGTCTGATCAGATGC	Lhx2(Homeobox)/HFSC-Lhx2-ChIP-Seq(GSE48068)/Homer		X	X							1e-07	238	0.0358	984.2	0.025	0.0108	0.01	27	0.0657	1813.8	0.0385	0.0272
AGTCGACTCAGTGTACAGTCATCGTCAGACTGGTCACGTA	Stat3(Stat)/mES-Stat3-ChIP-Seq(GSE11431)/Homer		X								1e-07	261	0.0392	1095.6	0.0279	0.0113
ATGCAGTCGTACAGCTTCGACTAGGATCCTGAGTCAAGTCGCTATCAG	Rfx5(HTH)/GM12878-Rfx5-ChIP-Seq(GSE31477)/Homer		X								1e-07	177	0.0266	686.3	0.0175	0.0091
ATGCGTACCTGAAGTCAGTCACTGGTCAAGTCGTCAGCATGCATGACT	At5g65130(AP2EREBP)/colamp-At5g65130-DAP-Seq(GSE60143)/Homer		X								1e-07	377	0.0567	1669.4	0.0425	0.0142
CAGTCATGGTACAGTCCGTAAGTCACTGACGTTACGCGTAATGCGTACGCTAGCATGCAT	ABF2(bZIP)/col-ABF2-DAP-Seq(GSE60143)/Homer		X								1e-07	133	0.02	471.5	0.012	0.008
CGATCGATCGATCGATCGATCGATCGATCGATCGATCGAT	SeqBias: A/T bias		X								1e-07	2223	0.3341	11962.3	0.3043	0.0298
CGTACATGAGTCGACTTGCACGTAACGTACGTCTGATCAG	Lhx1(Homeobox)/EmbryoCarcinoma-Lhx1-ChIP-Seq(GSE70957)/Homer		X	X							1e-07	244	0.0367	1002.7	0.0255	0.0112	0.001	30	0.073	1847.2	0.0392	0.0338
CGTACTGACGTACTAGTCGACTAGACTGCGTACGTATACGAGCTATCG	SpiB(ETS)/OCILY3-SPIB-ChIP-Seq(GSE56857)/Homer		X	X							1e-07	114	0.0171	384.7	0.0098	0.0073	0.01	10	0.0243	459.3	0.0097	0.0146
CTGACAGTCTGAAGTCCTAGGACTATCGGTAC	HIF-1b(HLH)/T47D-HIF1b-ChIP-Seq(GSE59937)/Homer		X								1e-07	703	0.1057	3397.8	0.0864	0.0193
GTACGTACGTACGTACGTACGTACGTACGTACGTACGTAC	SeqBias: C/A-bias		X								1e-07	6637	0.9974	39008.7	0.9923	0.0051
TACGTCGATAGCAGTCCGTAAGTCCTAGGCATACTGATCG	n-Myc(bHLH)/mES-nMyc-ChIP-Seq(GSE11431)/Homer		X								1e-07	435	0.0654	1966	0.05	0.0154
TAGCATGCCGTAAGTCCTAGGACTTACGTCAGAGCTGCTA	PIF7(bHLH)/col-PIF7-DAP-Seq(GSE60143)/Homer		X								1e-07	156	0.0234	583.5	0.0148	0.0086
TCGATAGCTGACCTGAAGTCACTGGACTCATG	c-Myc(bHLH)/LNCAP-cMyc-ChIP-Seq(Unpublished)/Homer		X								1e-07	463	0.0696	2117.9	0.0539	0.0157
TCGATGACAGTCCGTAAGTCCTAGACGTACTGACTGAGCTAGTCGCAT	Max(bHLH)/K562-Max-ChIP-Seq(GSE31477)/Homer		X								1e-07	326	0.049	1399.2	0.0356	0.0134
CGTACGTACGTACGATCATGTACGGACTATGCCGTAAGTCCTAGACGTACTGCATGGTAC	bZIP48(bZIP)/colamp-bZIP48-DAP-Seq(GSE60143)/Homer		X								1e-06	155	0.0233	592.8	0.0151	0.0082
CGTAGCATGACTCTAGACGTGTCAAGTCACTGCTAGGCTAGTACGCTA	SPL5(SBP)/colamp-SPL5-DAP-Seq(GSE60143)/Homer		X								1e-06	152	0.0228	586.9	0.0149	0.0079
GACTCATGGTACAGTCCGTAGATCTCAGACGTTAGCCGTAAGCTGATC	GBF3(bZIP)/Arabidopsis-GBF3-ChIP-Seq(GSE80564)/Homer		X								1e-06	179	0.0269	704.1	0.0179	0.009
GACTCTAGCTAGGTACAGTCGATCGACTGACTTAGCTCAG	NLP7(RWPRK)/col-NLP7-DAP-Seq(GSE60143)/Homer		X								1e-06	861	0.1294	4302.2	0.1094	0.02
GCTAGCATGCTAGCATGCATCGTACGTAAGTCAGTCACTGGCATGCATCGTAGCTAGCTA	MYB73(MYB)/col-MYB73-DAP-Seq(GSE60143)/Homer		X								1e-06	341	0.0512	1517.6	0.0386	0.0126
GTACAGCTCTGAGTCATGACACTGCTAGGTACGATCGACT	MYB56(MYB)/colamp-MYB56-DAP-Seq(GSE60143)/Homer		X								1e-06	225	0.0338	926	0.0236	0.0102
TCAGGTACCATGCAGTCTGACGTACGATGCATGACTGTCAGTACACTGAGTCGACTCGAT	LBD23(LOBAS2)/colamp-LBD23-DAP-Seq(GSE60143)/Homer		X								1e-06	1055	0.1586	5399.7	0.1374	0.0212
ACTGCAGTACGTCGTACGTAACGTACTGCTGA	Nkx6.1(Homeobox)/Islet-Nkx6.1-ChIP-Seq(GSE40975)/Homer			X													0.001	65	0.1582	4845	0.1027	0.0555
AGTCGACTGATCCGTAGTACAGTCGCTACGTAGTACAGTCGTACGTAC	MYB63(MYB)/col-MYB63-DAP-Seq(GSE60143)/Homer			X													0.01	16	0.0389	935.4	0.0198	0.0191
AGTCGTACAGCTCTAGAGTCCGATACTGCGTAACTGGTCA	Zic(Zf)/Cerebellum-ZIC1.2-ChIP-Seq(GSE60731)/Homer			X													0.001	52	0.1265	3547.2	0.0752	0.0513
ATGCCATGACGTACGTACTGCGTAAGTCGACTGCATCGAT	WRKY71(WRKY)/col-WRKY71-DAP-Seq(GSE60143)/Homer			X													0.01	18	0.0438	1078.5	0.0229	0.0209
ATGCCATGAGCTCAGTCATGTCGAAGTCGACTCGATCGATCAGTCAGT	WRKY26(WRKY)/colamp-WRKY26-DAP-Seq(GSE60143)/Homer			X													0.01	14	0.0341	760.6	0.0161	0.018
ATGCGATCCGTACGTAACGTATGCCGTAACGTCGATCTAGACTGGTAC	HAT1(Homeobox)/col-HAT1-DAP-Seq(GSE60143)/Homer			X													0.01	7	0.017	230.4	0.0049	0.0121
CATGTACGTAGCGATCGATCATGCGTACGACTTCAGATGCCGATATCGCAGTACTGGTAC	Zic3(Zf)/mES-Zic3-ChIP-Seq(GSE37889)/Homer			X													0.001	54	0.1314	3890.5	0.0825	0.0489
CGATGATCTACGCTGAGCTACGTAGCATAGTCCTAGCGTAGCATCGAT	AT2G15740(C2H2)/col-AT2G15740-DAP-Seq(GSE60143)/Homer			X													0.01	17	0.0414	976	0.0207	0.0207
CGTACGTACTAGACGTACGTCGTAACTGACTGACGTCTGATCGATCGA	MYB4(MYB)/col200-MYB4-DAP-Seq(GSE60143)/Homer			X													0.01	22	0.0535	1222	0.0259	0.0276
CGTACTAGCATGAGCTACTGCGATATCGCGTAGTCAGTCA	Tbet(T-box)/CD8-Tbet-ChIP-Seq(GSE33802)/Homer			X													0.0001	40	0.0973	2343.3	0.0497	0.0476
CTAGACTGACGTCGTAACTGACTGAGCTCTAGTCAGCTAG	MYB93(MYB)/colamp-MYB93-DAP-Seq(GSE60143)/Homer			X													0.01	35	0.0852	2632.9	0.0558	0.0294
CTAGGTACCATGGACTCGATCATGGTCAGTACGACTCGATCGATCGAT	WRKY27(WRKY)/colamp-WRKY27-DAP-Seq(GSE60143)/Homer			X													0.01	21	0.0511	1250.9	0.0265	0.0246
CTGAATGCGCTACGATATGCCGTACGTACGTACTAGTACG	Tcf3(HMG)/mES-Tcf3-ChIP-Seq(GSE11724)/Homer			X													0.001	12	0.0292	410.8	0.0087	0.0205
CTGACTAGATCGAGCTACTGGACTAGTCCTGA	Tbx5(T-box)/HL1-Tbx5.biotin-ChIP-Seq(GSE21529)/Homer			X													0.01	121	0.2944	11324.3	0.2401	0.0543
CTGACTAGATCGGCATACTGGTACATGCCGTAACTGGCTAAGTCCGTA	Tbox:Smad(T-box,MAD)/ESCd5-Smad2_3-ChIP-Seq(GSE29422)/Homer			X													0.0001	15	0.0365	440	0.0093	0.0272
GACTCAGTAGCTCGATAGTCGATCAGTCCGTAATGCTCAG	Rbpj1(?)/Panc1-Rbpj1-ChIP-Seq(GSE47459)/Homer			X													0.01	53	0.129	4004.4	0.0849	0.0441
GATCGATCGTCACGTAACGTTACGCGTAACGTGCATCTAG	ATHB18(Homeobox)/colamp-ATHB18-DAP-Seq(GSE60143)/Homer			X													0.01	7	0.017	231.4	0.0049	0.0121
GCATCTAGACTGACGTCGTAACTGACTGCGATCTAGTCGATCGAGCTA	MYB40(MYB)/col-MYB40-DAP-Seq(GSE60143)/Homer			X													0.01	13	0.0316	678.3	0.0144	0.0172
GCTATCGACGTACTGAACTGACGTAGTCCGTACGTAAGTCCTAGTGCA	WRKY42(WRKY)/colamp-WRKY42-DAP-Seq(GSE60143)/Homer			X													0.01	11	0.0268	531.8	0.0113	0.0155
GTACCATGAGCTACGTACTGCGTAAGTCGACTGCATCGAT	WRKY29(WRKY)/colamp-WRKY29-DAP-Seq(GSE60143)/Homer			X													0.001	27	0.0657	1525.3	0.0323	0.0334
GTCACTAGAGCTTCGATGCACAGTAGCTCGTACTGAACGT	ATHB33(ZFHD)/col-ATHB33-DAP-Seq(GSE60143)/Homer			X													0.01	33	0.0803	2119.5	0.0449	0.0354
TCAGGCATCGTACGTAAGTCATGCACTGGCATGCATGCTAGATCCTGA	MYB81(MYB)/col-MYB81-DAP-Seq(GSE60143)/Homer			X													0.01	33	0.0803	2452	0.052	0.0283
TCGACGTAAGTCCGTACTAGAGTCCGATACTGGACTAGCTACTGGACT	HLH-1(bHLH)/cElegans-Embryo-HLH1-ChIP-Seq(modEncode)/Homer			X													0.01	29	0.0706	1810.8	0.0384	0.0322
TGACGCTATGACCGTATCAGGATCCGTACATGCATGCTAGCTAGCTAG	Unknown-ESC-element(?)/mES-Nanog-ChIP-Seq(GSE11724)/Homer			X													0.01	38	0.0925	2758.3	0.0585	0.034
TGCACTGAATGCGTCAACTGACTGCGTACGTACTAGAGCT	Ets1-distal(ETS)/CD4+-PolII-ChIP-Seq(Barski_et_al.)/Homer			X													0.01	13	0.0316	616.7	0.0131	0.0185
